# Supplementary material for: Modulation of the Drosophila transcriptome by developmental exposure to alcohol
Source: BMC Genomics. 2022 May 6;23:347. doi: 10.1186/s12864-022-08559-9 (PMC9074282; doi:10.1186/s12864-022-08559-9)
Supplement: Supplementary file 1 — Additional file 1. DGRP lines used for transcriptional profiling. [file 12864_2022_8559_MOESM1_ESM.xlsx]

## Sheet: Sheet1
DGRP Line
DGRP_28
DGRP_40
DGRP_45
DGRP_49
DGRP_57
DGRP_59
DGRP_73
DGRP_75
DGRP_83
DGRP_105
DGRP_129
DGRP_142
DGRP_153
DGRP_158
DGRP_176
DGRP_177
DGRP_181
DGRP_195
DGRP_208
DGRP_217
DGRP_228
DGRP_229
DGRP_239
DGRP_280
DGRP_287
DGRP_306
DGRP_313
DGRP_315
DGRP_318
DGRP_320
DGRP_324
DGRP_335
DGRP_340
DGRP_355
DGRP_358
DGRP_360
DGRP_362
DGRP_365
DGRP_367
DGRP_370
DGRP_371
DGRP_374
DGRP_375
DGRP_379
DGRP_380
DGRP_382
DGRP_383
DGRP_385
DGRP_386
DGRP_399
DGRP_406
DGRP_427
DGRP_437
DGRP_439
DGRP_441
DGRP_461
DGRP_486
DGRP_505
DGRP_513
DGRP_517
DGRP_530
DGRP_555
DGRP_589
DGRP_596
DGRP_703
DGRP_705
DGRP_707
DGRP_712
DGRP_716
DGRP_721
DGRP_727
DGRP_730
DGRP_748
DGRP_761
DGRP_765
DGRP_783
DGRP_786
DGRP_787
DGRP_790
DGRP_799
DGRP_801
DGRP_804
DGRP_805
DGRP_808
DGRP_820
DGRP_822
DGRP_837
DGRP_843
DGRP_849
DGRP_850
DGRP_852
DGRP_882
DGRP_890
DGRP_897
DGRP_900
DGRP_911
