# Supplementary material for: Modulation of the Drosophila transcriptome by developmental exposure to alcohol
Source: BMC Genomics. 2022 May 6;23:347. doi: 10.1186/s12864-022-08559-9 (PMC9074282; doi:10.1186/s12864-022-08559-9)
Supplement: Supplementary file 3 — Additional file 3. ANOVA for differences in transcript abundances between flies reared on regular and ethanol supplemented medium for (A) females and (B) males. [file 12864_2022_8559_MOESM3_ESM.xlsx]

## Sheet: A. Female_mixed_model_results
FlyBase Gene ID	Gene Symbol	Gene Locus	Gene Strand	TYPE	Expressed in DGRP	% Variance Explained by Alignment Bias	Alignment Bias Effect P-value	Alignment Bias Effect FDR	Wolbachia Effect P-value	Wolbachia Effect FDR	Treatment Effect P-value	Treatment Effect FDR	H2	Line Effect P-value	Line Effect FDR	Treatment by Line Effect P-value	Treatment by Line Effect FDR	Significant Treatment
FBgn0000003	7SLRNA:CR32864	3R:2648220-2648518	+	Known	YES	0.000608984	0.629751	0.930842	0.94979	0.992801	7.06e-11	4.67542e-10	0.164837	0.00132555	0.00438023	1	1	NONE
FBgn0000008	a	2R:18024473-18060339	+	Known	YES	0.00868471	0.0681224	0.299926	0.186335	0.782809	6.08529e-11	4.04591e-10	0.631656	6.56139e-21	2.08515e-19	1	1	BOTH
FBgn0000014	abd-A	3R:12632936-12655771	-	Known	YES	0.000662988	0.614961	0.921548	0.125209	0.740514	4.44089e-16	4.71912e-15	0.27632	0.00108451	0.00365274	0.328263	1	BASELINE
FBgn0000015	Abd-B	3R:12752932-12797958	-	Known	YES	0.000519465	0.656155	0.945011	0.494761	0.913932	2.11386e-13	1.7259e-12	0.196039	0.0381041	0.087573	0.361687	1	BASELINE
FBgn0000017	Abl	3L:16608966-16640982	-	Known	YES	0.00238833	0.339521	0.715559	0.622527	0.944438	0.145967	0.241509	0.310931	1.45186e-05	7.29893e-05	0.607266	1	BOTH
FBgn0000018	abo	2L:10973443-10975293	-	Known	YES	0.0181513	0.0082041	0.0710096	0.639305	0.947423	0	0	0.392256	7.55457e-07	4.7026e-06	0.304939	1	BOTH
FBgn0000022	ac	X:264064-264980	+	Known	YES	0.00116862	0.504197	0.85058	0.330672	0.857336	0.453119	0.572352	0.25408	0.590306	0.853325	0.00766902	0.154148	ETOH
FBgn0000024	Ace	3R:9048673-9085239	-	Known	YES	0.0194225	0.00622977	0.0580021	0.0453097	0.676857	1.52058e-11	1.05822e-10	0.563828	2.07163e-09	1.82298e-08	0.00923422	0.174224	BOTH
FBgn0000028	acj6	X:15244272-15273097	-	Known	YES	0.00201027	0.380933	0.753948	0.826864	0.978305	0.252687	0.368861	0.058023	1	1	0.501517	1	NONE
FBgn0000032	Acph-1	3R:25816866-25819133	-	Known	YES	0.0081012	0.0781386	0.326386	0.167109	0.769826	0	0	0.335214	2.12797e-07	1.44422e-06	0.958027	1	BASELINE
FBgn0000036	nAChRalpha1	3R:20219618-20282879	-	Known	YES	0.00337299	0.256237	0.627105	0.567486	0.935667	1.05416e-12	8.06462e-12	0.368932	0.000753166	0.00263035	0.03641	0.377468	BOTH
FBgn0000037	mAChR-A	2R:20266153-20277817	-	Known	YES	0.000888052	0.56044	0.888795	0.522257	0.922613	4.03677e-13	3.21064e-12	0.383608	3.26797e-08	2.49125e-07	0.717614	1	BOTH
FBgn0000038	nAChRbeta1	3L:4429349-4435993	+	Known	YES	0.00933644	0.0585289	0.27291	0.276761	0.83399	2.94126e-07	1.4993e-06	0.192079	0.0618144	0.133405	0.311362	1	BASELINE
FBgn0000039	nAChRalpha2	3R:20311150-20316869	+	Known	YES	0.00927621	0.0593521	0.275304	0.519806	0.921725	1.69835e-07	8.8443e-07	0.224382	0.0154562	0.0394459	0.318675	1	BASELINE
FBgn0000042	Act5C	X:5794894-5799432	+	Known	YES	0.00256997	0.321778	0.697952	0.261768	0.827972	1.20792e-13	1.00909e-12	0.38425	0.478947	0.727446	1.93258e-05	0.00166994	BOTH
FBgn0000043	Act42A	2R:1901415-1903194	-	Known	YES	1.84212e-05	0.93319	1	0.96705	0.99554	3.66374e-15	3.53975e-14	0.408764	4.81236e-05	0.000219009	0.040473	0.401105	BOTH
FBgn0000044	Act57B	2R:16831526-16833936	+	Known	YES	0.00258179	0.320666	0.696892	0.681235	0.953856	1.73195e-14	1.5744e-13	0.357273	0.000201169	0.000803981	0.0998525	0.632664	BOTH
FBgn0000045	Act79B	3L:21978310-21980290	+	Known	YES	0.0102965	0.0469138	0.236523	0.84943	0.981808	7.34791e-07	3.61952e-06	0.360527	7.01904e-09	5.77349e-08	1	1	BASELINE
FBgn0000046	Act87E	3R:9251705-9254097	+	Known	YES	0.00496785	0.168083	0.50851	0.727119	0.962315	9.28868e-09	5.30537e-08	0.502098	4.67611e-09	3.93811e-08	0.0832056	0.576342	BOTH
FBgn0000047	Act88F	3R:11265691-11267899	+	Known	YES	0.00730133	0.0945186	0.365168	0.195962	0.789201	0.819977	0.873954	0.371288	3.73261e-10	3.64743e-09	1	1	BASELINE
FBgn0000052	Pfas	2L:6041181-6046050	-	Known	YES	0.00137351	0.468989	0.825775	0.633183	0.946814	0	0	0.521948	3.51421e-15	6.11739e-14	1	1	BOTH
FBgn0000053	Gart	2L:7014623-7023898	-	Known	YES	0.00173379	0.41585	0.781675	0.657581	0.951133	2.22045e-16	2.42491e-15	0.523711	1.99847e-11	2.2575e-10	0.233977	0.935767	BOTH
FBgn0000054	Adf1	2R:2549770-2555590	+	Known	YES	0.0008433	0.570495	0.895073	0.0173054	0.643733	0	0	0.323904	0.00351588	0.0104807	0.0628388	0.500622	BASELINE
FBgn0000055	Adh	2L:14615552-14618902	+	Known	YES	0.115011	8.65068e-12	8.73588e-10	0.95735	0.994345	2.66454e-15	2.6143e-14	0.77196	7.56445e-21	2.38953e-19	0.00147171	0.0519937	BOTH
FBgn0000057	adp	2R:14039209-14041565	+	Known	YES	0.00687107	0.104838	0.389548	0.0241644	0.655419	4.44089e-16	4.71912e-15	0.53503	2.41397e-16	4.78328e-15	1	1	BOTH
FBgn0000061	al	2L:378112-387439	+	Known	YES	0.000193839	0.785661	1	0.069209	0.688979	0.689181	0.774419	0.340001	0.510062	0.764284	0.000214909	0.0123802	ETOH
FBgn0000063	Mps1	3R:13496993-13499550	+	Known	YES	0.014719	0.0173853	0.121992	0.183886	0.780779	1.11022e-15	1.13688e-14	0.340781	0.00375531	0.0111272	0.0359458	0.375157	BOTH
FBgn0000064	Ald	3R:22079791-22087313	-	Known	YES	0.000173779	0.796799	1	0.704281	0.958172	9.45624e-08	5.02434e-07	0.379811	1.1508e-06	6.96187e-06	0.350094	1	BOTH
FBgn0000071	Ama	3R:2588315-2590983	+	Known	YES	0.00010732	0.839645	1	0.748226	0.965999	0.0108527	0.0282734	0.29224	0.0223802	0.0548534	0.0522481	0.454199	BASELINE
FBgn0000075	amd	2L:19110154-19114110	+	Known	YES	0.00011367	0.835034	1	0.7543	0.966888	0.886891	0.922364	0.284728	0.00874563	0.0237325	0.111797	0.667182	BASELINE
FBgn0000077	amx	X:9139948-9141369	-	Known	YES	8.63598e-05	0.855963	1	0.0567985	0.683125	1.22125e-15	1.24905e-14	0.302533	5.58625e-05	0.000250857	0.500905	1	BASELINE
FBgn0000078	Amy-d	2R:13012269-13013874	+	Known	YES	0.00274143	0.306132	0.683243	0.083915	0.705036	0	0	0.90867	5.72152e-32	5.43415e-30	2.79239e-08	5.74359e-06	BOTH
FBgn0000079	Amy-p	2R:13006141-13007808	-	Known	YES	0.0848437	6.03201e-09	3.48081e-07	0.594179	0.940567	0	0	0.902346	3.42392e-35	4.28335e-33	3.27077e-05	0.00255021	BOTH
FBgn0000083	AnxB9	3R:16890963-16896639	+	Known	YES	0.0112429	0.037812	0.2059	0.279974	0.835949	0.0445872	0.0935101	0.431908	2.22034e-12	2.80487e-11	1	1	BOTH
FBgn0000084	AnxB10	X:20065478-20067547	-	Known	YES	0.000963162	0.544302	0.877052	0.766293	0.968455	0.0282477	0.063824	0.272061	3.19441e-06	1.8021e-05	1	1	BASELINE
FBgn0000092	CG2650	X:2586765-2587919	-	Known	YES	0.000631693	0.623436	0.926649	0.44789	0.898191	0.107127	0.189202	0.383526	3.43542e-09	2.94351e-08	0.999999	1	BOTH
FBgn0000094	Anp	3R:26035670-26036104	+	Known	YES	0.00134725	0.473273	0.828523	0.642625	0.947423	0.0273843	0.0621698	0.132204	1	1	0.0729065	0.538875	NONE
FBgn0000097	aop	2L:2156484-2178754	-	Known	YES	0.0119005	0.0325883	0.186831	0.886391	0.985863	0.000511355	0.00181534	0.287983	0.00122803	0.00408615	0.249455	0.960545	BASELINE
FBgn0000099	ap	2R:1593707-1615030	-	Known	YES	9.12721e-05	0.851969	1	0.285111	0.837832	5.76206e-14	4.96328e-13	0.696335	2.12084e-12	2.68424e-11	4.07426e-05	0.00309045	BOTH
FBgn0000100	RpLP0	3L:22068967-22070587	+	Known	YES	0.00137436	0.468853	0.82572	0.498319	0.914748	0.000210089	0.000793571	0.159868	0.000544831	0.00196668	1	1	NONE
FBgn0000108	Appl	X:424534-473077	+	Known	YES	1.29906e-05	0.943876	1	0.254393	0.823558	0	0	0.35349	0.028539	0.0679806	0.004928	0.114032	BOTH
FBgn0000109	Aprt	3L:1883795-1885019	-	Known	YES	0.00101677	0.533302	0.870907	0.360909	0.870219	1.69686e-11	1.17796e-10	0.290739	1.92393e-05	9.44833e-05	0.752052	1	BASELINE
FBgn0000114	bru1	2L:12175004-12313438	+	Known	YES	0.000237175	0.763551	1	0.0920203	0.713763	0	0	0.370652	1.90708e-08	1.4932e-07	0.920108	1	BASELINE
FBgn0000115	Arl1	3L:15976235-15977462	+	Known	YES	0.0312009	0.000506159	0.00773817	0.0704963	0.691433	1.41698e-06	6.79614e-06	0.224474	7.71386e-05	0.000336889	0.999999	1	BASELINE
FBgn0000116	Argk	3L:9041881-9059127	-	Known	YES	0.00424901	0.202472	0.559489	0.585225	0.938935	1.71151e-07	8.91146e-07	0.478592	2.12526e-12	2.68882e-11	0.873961	1	BOTH
FBgn0000117	arm	X:1785434-1794679	-	Known	YES	0.000434839	0.683757	0.961372	0.123577	0.739557	0	0	0.194657	0.00101745	0.00344916	1	1	BASELINE
FBgn0000119	arr	2R:9341145-9370734	-	Known	YES	0.0029836	0.285664	0.660836	0.133102	0.748939	6.66134e-16	6.94437e-15	0.283772	4.03612e-05	0.00018657	0.707996	1	BASELINE
FBgn0000120	Arr1	2L:18078269-18081307	+	Known	YES	0.00403191	0.214427	0.575911	0.104824	0.722409	4.06204e-11	2.74206e-10	0.543923	1.84503e-06	1.0839e-05	0.000519958	0.0242794	BOTH
FBgn0000121	Arr2	3L:8640361-8642036	-	Known	YES	0.0113655	0.0367759	0.202328	0.263121	0.828843	2.30562e-07	1.18739e-06	0.513145	9.93405e-05	0.000425145	0.000168515	0.0100155	BOTH
FBgn0000137	ase	X:354780-357209	+	Known	RARE	0.00340536	0.253964	0.62454	0.423663	0.89048	0.784994	0.847802	0.285341	0.0249216	0.0603151	0.0595304	0.486406	BASELINE
FBgn0000139	ash2	3R:20475847-20479098	+	Known	YES	2.82235e-05	0.917355	1	0.216285	0.805309	0	0	0.419381	1.70879e-10	1.73031e-09	1	1	BOTH
FBgn0000140	asp	3R:20579571-20586235	+	Known	YES	2.24896e-05	0.926199	1	0.109477	0.723886	0	0	0.340591	0.0011179	0.00375211	0.0710194	0.531997	BASELINE
FBgn0000146	aub	2L:10997819-11001476	-	Known	YES	0.0381737	0.000116496	0.00226051	0.965945	0.995342	0	0	0.562774	2.76247e-15	4.87203e-14	0.620758	1	BOTH
FBgn0000147	aurA	3R:7788846-7790548	+	Known	YES	0.00097924	0.54096	0.875157	0.0648642	0.686923	3.08642e-14	2.74243e-13	0.334675	9.6808e-05	0.000415315	0.231951	0.932561	BASELINE
FBgn0000150	awd	3R:27570894-27571799	-	Known	YES	0.00176679	0.411443	0.778952	0.0431744	0.672871	0.527252	0.639596	0.145908	0.00328452	0.00986739	1	1	NONE
FBgn0000152	Axs	X:16574122-16577928	-	Known	YES	0.0182324	0.00806105	0.0702164	0.247099	0.819868	8.57966e-06	3.81678e-05	0.276098	4.90224e-07	3.13599e-06	1	1	BASELINE
FBgn0000153	b	2L:13821248-13823979	+	Known	YES	1.07933e-07	0.99488	1	0.986671	0.997699	2.01214e-07	1.04201e-06	0.408469	2.83886e-06	1.61511e-05	0.135671	0.730574	BOTH
FBgn0000157	Dll	2R:20702345-20723190	+	Known	YES	0.0026257	0.31658	0.693044	0.155786	0.762433	1.36572e-11	9.55404e-11	0.342438	0.183777	0.337066	0.00102634	0.0399652	BOTH
FBgn0000158	bam	3R:21068761-21070779	-	Known	YES	0.004364	0.196458	0.550918	0.660731	0.951407	1.11022e-16	1.26222e-15	0.783062	2.62925e-24	1.19123e-22	0.0159804	0.238865	BOTH
FBgn0000163	baz	X:17054039-17094738	+	Known	YES	0.0132156	0.024268	0.153084	0.90437	0.98905	8.70309e-11	5.72171e-10	0.219716	3.17629e-05	0.000149714	1	1	BASELINE
FBgn0000166	bcd	3R:2581564-2585188	-	Known	YES	0.00146522	0.454506	0.81466	0.0384339	0.670318	0	0	0.325153	8.8465e-05	0.000382065	0.291941	1	BASELINE
FBgn0000173	ben	X:13890378-13893838	+	Known	YES	0.00106848	0.523066	0.86448	3.46834e-13	1.16245e-08	0	0	0.131848	0.0285616	0.0680297	0.937954	1	BASELINE
FBgn0000179	bi	X:4306889-4379680	+	Known	YES	0.00121214	0.496359	0.844826	0.538441	0.927836	8.37108e-14	7.09753e-13	0.181629	0.115702	0.228145	0.273923	0.999217	BASELINE
FBgn0000180	bib	2L:9984645-9995538	+	Known	YES	0.00349834	0.247571	0.61688	0.864993	0.983665	9.32648e-07	4.55267e-06	0.461183	8.412e-10	7.83238e-09	0.403503	1	BOTH
FBgn0000181	bic	2R:8757754-8759299	+	Known	YES	0.00581261	0.135882	0.451521	0.386145	0.878784	0.000113023	0.000442792	0.367841	2.57603e-09	2.23979e-08	1	1	BOTH
FBgn0000182	BicC	2L:16042047-16048757	+	Known	YES	0.0182564	0.0080192	0.0699791	0.180135	0.779905	5.49764e-06	2.48998e-05	0.167823	1	1	0.0283159	0.329617	NONE
FBgn0000183	BicD	2L:17459605-17473215	-	Known	YES	0.00016798	0.800145	1	0.788296	0.971306	3.50404e-09	2.06436e-08	0.571112	5.61714e-10	5.35473e-09	0.0119912	0.20227	BOTH
FBgn0000206	boss	3R:21787716-21792670	+	Known	YES	0.000878056	0.562656	0.890198	0.461614	0.903655	7.78883e-11	5.14486e-10	0.389606	0.00192204	0.00610114	0.00950453	0.176836	BOTH
FBgn0000210	br	X:1469165-1558902	+	Known	YES	0.00705833	0.100203	0.378409	0.452477	0.901028	0.0115137	0.0297391	0.345999	8.0045e-06	4.19717e-05	0.395894	1	BOTH
FBgn0000212	brm	3L:15963182-15975969	-	Known	YES	0.000429232	0.685693	0.962698	0.360452	0.87001	0.12909	0.219322	0.278228	0.000137819	0.000570592	0.579326	1	BASELINE
FBgn0000216	Brd	3L:14965767-14966298	+	Known	YES	0.0265766	0.0013476	0.0173306	0.389076	0.880261	0.837824	0.887163	0.192243	0.156264	0.294598	0.184368	0.841679	NONE
FBgn0000221	brn	X:3998375-3999824	+	Known	YES	8.56722e-05	0.856532	1	0.104633	0.722409	9.83601e-10	6.03669e-09	0.214103	0.000987699	0.00335678	0.840245	1	BASELINE
FBgn0000227	Bsg25A	2L:4683052-4684461	-	Known	YES	1.16884e-05	0.946759	1	0.923105	0.990437	0.0657525	0.128148	0.186406	0.439256	0.680447	0.0919702	0.608206	NONE
FBgn0000228	Bsg25D	2L:5271728-5278548	-	Known	YES	0.0083846	0.0730905	0.313487	0.413834	0.886167	0	0	0.264664	0.00263012	0.00807301	0.298418	1	BASELINE
FBgn0000229	bsk	2L:10247502-10250501	-	Known	YES	0.00146616	0.454361	0.81466	0.602121	0.942149	2.16289e-07	1.11645e-06	0.182138	0.00788338	0.0216078	0.750789	1	NONE
FBgn0000233	btd	X:9588219-9591591	+	Known	YES	6.71041e-05	0.872878	1	0.603292	0.942149	0.00964705	0.0255375	0.0969598	1	1	0.212024	0.895479	NONE
FBgn0000239	bur	2L:21174182-21179683	-	Known	YES	0.0113372	0.0370121	0.203127	0.381495	0.876831	0	0	0.270748	0.00116718	0.00389996	0.354825	1	BASELINE
FBgn0000241	bw	2R:19415328-19426022	-	Known	YES	0.000475767	0.670046	0.95375	0.390245	0.880729	0.250816	0.36661	0.410818	1.127e-07	7.95808e-07	0.345893	1	BOTH
FBgn0000244	by	3R:5353960-5358733	-	Known	YES	0.000456022	0.67657	0.957424	0.01661	0.643733	5.83189e-12	4.20438e-11	0.388981	1.73999e-05	8.61692e-05	0.116005	0.680305	BOTH
FBgn0000246	c(3)G	3R:11615195-11618301	-	Known	YES	0.00734696	0.0934906	0.363107	0.0519842	0.679301	0	0	0.877667	1.30714e-39	2.44829e-37	0.149859	0.764533	BOTH
FBgn0000247	ca	3R:25632533-25640769	+	Known	YES	0.0534882	4.66067e-06	0.000137915	0.89977	0.988075	2.39492e-08	1.32368e-07	0.19215	0.00118067	0.0039407	1	1	BASELINE
FBgn0000250	cact	2L:16313036-16326207	-	Known	YES	0.00299591	0.28467	0.660009	0.268493	0.829922	1.11022e-16	1.26222e-15	0.269145	3.19233e-05	0.000150343	0.881583	1	BASELINE
FBgn0000251	cad	2L:20770731-20783135	+	Known	YES	0.00699215	0.101815	0.382257	0.0800189	0.700819	2.86327e-13	2.30797e-12	0.279956	0.0106587	0.0283164	0.113608	0.67235	BOTH
FBgn0000253	Cam	2R:8146903-8166314	+	Known	YES	0.00114823	0.507943	0.854046	0.777997	0.970138	0	0	0.113514	0.840863	1	0.237801	0.94263	NONE
FBgn0000256	capu	2L:3872646-3902860	-	Known	YES	0.000375876	0.704901	0.974087	0.0665595	0.687533	2.26024e-06	1.06396e-05	0.477941	4.61329e-14	7.10473e-13	1	1	BOTH
FBgn0000257	car	X:19460052-19463434	+	Known	YES	2.47562e-05	0.922581	1	0.000535448	0.429552	2.9023e-11	1.98194e-10	0.216707	3.91449e-05	0.000181473	1	1	BASELINE
FBgn0000259	CkIIbeta	X:11686566-11695620	+	Known	YES	8.75988e-05	0.854945	1	0.0771963	0.697462	0	0	0.259455	0.0812367	0.168886	0.0546481	0.466086	BASELINE
FBgn0000261	Cat	3L:18815704-18821288	+	Known	YES	0.0411318	6.2554e-05	0.00133159	0.417993	0.888116	1.17185e-05	5.1462e-05	0.552161	7.43918e-15	1.2421e-13	0.643554	1	BOTH
FBgn0000273	Pka-C1	2L:9682315-9699297	-	Known	YES	0.0665013	2.99427e-07	1.18804e-05	0.714528	0.960192	5.43224e-05	0.000221197	0.267528	0.079469	0.165766	0.0438625	0.418672	ETOH
FBgn0000274	Pka-C2	3R:26521259-26522860	-	Known	YES	0.00538574	0.151189	0.480178	0.790738	0.971306	0.000638097	0.00222613	0.489969	8.11165e-08	5.85237e-07	0.0418641	0.408492	BOTH
FBgn0000276	CecA1	3R:26036596-26036995	+	Known	YES	0.0037375	0.232005	0.597629	0.467421	0.904715	0.000602354	0.00211243	0.478112	2.37031e-07	1.59449e-06	0.0408768	0.40249	BOTH
FBgn0000277	CecA2	3R:26037878-26038290	+	Known	YES	0.00577354	0.137208	0.454159	0.270724	0.830468	0.000351052	0.00128196	0.470498	0.000356059	0.00134145	0.00074081	0.0315438	BOTH
FBgn0000278	CecB	3R:26039037-26039519	-	Known	YES	0.00873814	0.0672763	0.297569	0.79786	0.972901	0.00534052	0.015236	0.345118	0.00469991	0.0136027	0.0270352	0.321765	BOTH
FBgn0000279	CecC	3R:26042206-26042660	+	Known	YES	2.69126e-05	0.91929	1	0.579116	0.937614	0.00401077	0.0118228	0.504811	7.36719e-05	0.000322918	0.000362716	0.0184998	BOTH
FBgn0000280	Cec-Psi1	3R:26037249-26037475	+	Known	RARE	0.0133883	0.0233519	0.149014	0.0154599	0.640933	0.382829	0.503607	0.156271	0.605662	0.869861	0.136499	0.732766	BASELINE
FBgn0000281	Cec2	3R:26038625-26038864	+	Known	YES	0.0016407	0.428663	0.793135	0.19385	0.788383	0.00177302	0.00567027	0.150034	0.0235283	0.0573406	0.815492	1	NONE
FBgn0000283	Cp190	3R:11096154-11100963	-	Known	YES	0.0101747	0.0482423	0.240759	0.123073	0.738705	0	0	0.235836	0.0171933	0.0433478	0.243909	0.953093	BASELINE
FBgn0000286	Cf2	2L:4876891-4883107	-	Known	YES	0.00488055	0.171877	0.514609	0.816662	0.975659	0.970895	0.980727	0.267199	0.0031991	0.009641	0.263427	0.98198	BASELINE
FBgn0000287	salr	2L:11358873-11373636	+	Known	YES	0.00050422	0.66092	0.947861	0.566631	0.935575	1.03405e-06	5.03154e-06	0.649305	2.38615e-15	4.24856e-14	0.0398896	0.398294	BOTH
FBgn0000289	cg	2R:10061198-10070343	+	Known	YES	0.000603933	0.631175	0.931605	0.146322	0.755434	8.88178e-16	9.16226e-15	0.293696	0.00704143	0.0195235	0.0994784	0.631669	BASELINE
FBgn0000299	Col4a1	2L:5029609-5037279	+	Known	YES	5.87328e-05	0.881009	1	0.15439	0.761659	0	0	0.345685	7.10193e-05	0.000312435	0.202251	0.878464	BOTH
FBgn0000303	ChAT	3R:14531223-14558066	+	Known	YES	5.10253e-05	0.889037	1	0.402277	0.881742	2.58579e-09	1.53526e-08	0.397558	1.83394e-05	9.03814e-05	0.0891829	0.597052	BOTH
FBgn0000307	chif	2L:16342430-16352628	-	Known	YES	0.00861973	0.0691666	0.303125	0.896086	0.98722	0	0	0.280036	0.0639331	0.137359	0.0355283	0.372819	BOTH
FBgn0000308	chic	2L:5972115-5981018	-	Known	YES	0.0032767	0.263149	0.634931	0.272912	0.830948	0	0	0.087346	1	1	0.227004	0.923629	NONE
FBgn0000313	chp	3R:27029902-27036452	-	Known	YES	0.084978	5.86097e-09	3.39967e-07	0.988772	0.997951	1.2077e-11	8.49115e-11	0.388339	1.18352e-05	6.0331e-05	0.136839	0.733812	BOTH
FBgn0000316	cin	X:149707-152502	+	Known	YES	0.000899583	0.557904	0.887051	0.188366	0.784646	0	0	0.197189	0.00266539	0.00816992	0.81852	1	BASELINE
FBgn0000317	ck	2L:15044963-15057862	-	Known	YES	0.0551933	3.25545e-06	9.96761e-05	0.250792	0.822976	2.15383e-14	1.94367e-13	0.382499	0.00142418	0.00467253	0.01534	0.232928	BOTH
FBgn0000318	cl	2L:5520135-5521382	+	Known	YES	0.00805448	0.079006	0.328803	0.0719461	0.694508	5.39901e-13	4.23283e-12	0.740207	9.98463e-29	6.84769e-27	0.999999	1	BOTH
FBgn0000319	Chc	X:15722019-15729523	-	Known	YES	0.00995385	0.0507524	0.24895	0.301608	0.845307	1.83043e-09	1.09846e-08	0.289667	1.39838e-06	8.34373e-06	1	1	BASELINE
FBgn0000320	eya	2L:6527447-6546976	-	Known	YES	0.00231211	0.347356	0.723843	0.168788	0.770223	3.00994e-10	1.90991e-09	0.541607	1.10665e-09	1.01207e-08	0.0336245	0.360746	BOTH
FBgn0000326	clt	2R:17504566-17506584	-	Known	YES	0.0384626	0.000109628	0.00215319	0.474333	0.906733	7.60547e-12	5.44436e-11	0.207055	3.62463e-05	0.000168969	1	1	BASELINE
FBgn0000330	cm	X:6903039-6905178	-	Known	YES	0.0525335	5.69732e-06	0.000164809	0.159004	0.765196	3.65348e-07	1.84803e-06	0.153631	0.00468	0.0135498	1	1	NONE
FBgn0000337	cn	2R:3670302-3672572	-	Known	YES	0.000682809	0.609721	0.918233	0.812861	0.97501	0.358096	0.479158	0.0574238	0.187165	0.342041	1	1	NONE
FBgn0000339	cni	2L:16309292-16310726	-	Known	YES	0.0336859	0.000299639	0.00503054	0.0185127	0.645654	0	0	0.303356	7.31101e-07	4.55861e-06	0.999999	1	BASELINE
FBgn0000346	comt	X:13153054-13156521	+	Known	YES	0.0067121	0.108956	0.398403	0.625945	0.945135	0.000476776	0.00170231	0.690401	2.89138e-14	4.53836e-13	0.000953533	0.0379983	BOTH
FBgn0000351	cort	2L:6674682-6676635	-	Known	YES	0.0202447	0.00521703	0.0505539	0.120606	0.736826	1.01541e-12	7.77885e-12	0.408647	2.709e-05	0.000129543	0.0534685	0.459651	BOTH
FBgn0000352	cos	2R:3269681-3274620	-	Known	YES	0.0265923	0.00134309	0.0172926	0.120221	0.736041	0	0	0.383199	0.000693062	0.00243925	0.0233651	0.295643	BASELINE
FBgn0000355	Cp15	3L:8721581-8722166	+	Known	YES	0.00519617	0.158601	0.492832	0.192126	0.787967	2.37217e-05	0.000100947	0.211798	0.0190957	0.0476071	0.366289	1	BASELINE
FBgn0000356	Cp16	3L:8725044-8725699	+	Known	YES	8.38763e-05	0.858027	1	0.395846	0.881742	1.69569e-05	7.3323e-05	0.175412	0.129875	0.251956	0.288912	1	BASELINE
FBgn0000357	Cp18	3L:8719891-8720713	+	Known	YES	1.55296e-05	0.938646	1	0.349139	0.865735	0.000616741	0.00215747	0.102985	0.550821	0.80983	0.415148	1	BASELINE
FBgn0000358	Cp19	3L:8722965-8723704	+	Known	YES	0.0237234	0.0024742	0.0282532	0.248981	0.821425	0.00292191	0.0088802	0.239777	0.156765	0.295356	0.0565838	0.47415	BASELINE
FBgn0000359	Cp36	X:8373352-8374556	+	Known	YES	2.21563e-06	0.976806	1	0.309863	0.847953	0.0594439	0.118056	0.294598	0.527734	0.783728	0.00179628	0.059878	BASELINE
FBgn0000360	Cp38	X:8375870-8377344	+	Known	YES	0.00450131	0.189548	0.541295	0.239303	0.813487	0.0244505	0.0565706	0.293026	0.597361	0.860814	0.00153435	0.0537537	BASELINE
FBgn0000370	crc	2L:21310866-21319527	+	Known	YES	6.45644e-06	0.960417	1	0.946493	0.992718	0.00660988	0.0184031	0.693168	0.0017862	0.00571486	5.1912e-15	3.41265e-12	BOTH
FBgn0000376	crm	X:2628281-2632806	-	Known	YES	0.00106704	0.523347	0.864688	0.489657	0.9124	0.225872	0.339064	0.292634	0.00181144	0.00578898	0.193418	0.858789	BASELINE
FBgn0000377	crn	X:2141627-2144016	-	Known	YES	0.00217792	0.361757	0.737079	0.255239	0.824042	5.18805e-06	2.35645e-05	0.125393	0.00911853	0.0246606	1	1	NONE
FBgn0000382	csw	X:1988267-2009734	+	Known	YES	0.0845434	6.43296e-09	3.68051e-07	0.730863	0.962833	0.000495856	0.00176405	0.149794	0.0743666	0.156437	0.566948	1	BASELINE
FBgn0000384	cta	2L:22874548-22885683	+	Known	YES	0.00280569	0.300522	0.677068	0.0994917	0.717748	0	0	0.174193	0.0126538	0.0330666	0.728687	1	BASELINE
FBgn0000394	cv	X:5584035-5587117	+	Known	YES	0.0454962	2.50053e-05	0.000605309	0.0145772	0.640933	0.043962	0.0924709	0.716596	1.06543e-28	7.2456e-27	1	1	BOTH
FBgn0000395	cv-2	2R:17242520-17266969	-	Known	YES	0.0192027	0.00653293	0.0602047	0.0428385	0.672871	0	0	0.556598	3.70928e-09	3.1644e-08	0.00994696	0.182336	BOTH
FBgn0000404	CycA	3L:11819819-11826678	-	Known	YES	0.00538603	0.151178	0.480178	0.25809	0.825964	0	0	0.28706	0.000293642	0.00112849	0.410431	1	BASELINE
FBgn0000405	CycB	2R:18691026-18694453	-	Known	YES	6.82777e-05	0.871781	1	0.359374	0.87001	0	0	0.36311	0.000455438	0.00167282	0.0572823	0.477954	BOTH
FBgn0000406	Cyt-b5-r	2L:16788774-16790721	-	Known	YES	0.00877104	0.0667607	0.296184	0.697404	0.956947	0	0	0.684776	2.01572e-14	3.21355e-13	0.00178773	0.0597399	BOTH
FBgn0000409	Cyt-c-p	2L:16719932-16722644	+	Known	YES	0.000454188	0.677185	0.957571	0.968041	0.995589	6.87685e-05	0.000276692	0.396857	2.29294e-09	2.00719e-08	0.920286	1	BASELINE
FBgn0000411	D	3L:14168710-14171720	-	Known	YES	0.0100244	0.0499357	0.246314	0.765052	0.968455	1.2562e-09	7.63977e-09	0.264581	0.0519593	0.114578	0.0654118	0.51037	BASELINE
FBgn0000412	D1	3R:5063805-5066376	-	Known	YES	0.0174447	0.00956642	0.0794091	0.125431	0.740776	9.85878e-14	8.31681e-13	0.22663	0.0223267	0.0547464	0.260215	0.97623	BASELINE
FBgn0000413	da	2L:10388105-10393228	+	Known	YES	0.0142088	0.0194617	0.131498	0.0720884	0.694508	0	0	0.332082	0.00271766	0.00831037	0.056918	0.476001	BASELINE
FBgn0000414	Dab	3L:16705226-16717675	+	Known	YES	0.00135513	0.471981	0.827881	0.867924	0.983822	0.10105	0.180841	0.346621	2.90591e-10	2.87309e-09	1	1	BASELINE
FBgn0000416	Sap-r	3R:26709186-26714784	-	Known	YES	8.45776e-07	0.985668	1	0.107168	0.722943	0	0	0.266637	2.94413e-06	1.67075e-05	1	1	BASELINE
FBgn0000422	Ddc	2L:19116483-19120306	-	Known	YES	0.0254177	0.00172415	0.0209896	0.077716	0.697922	0.00104669	0.00350597	0.593274	2.66945e-12	3.3445e-11	0.040349	0.400195	BOTH
FBgn0000426	SmF	2R:8071349-8071815	-	Known	YES	0.000923191	0.55278	0.883241	0.102541	0.72093	2.9432e-13	2.36898e-12	0.394682	0.000262421	0.00102008	0.027112	0.322334	BOTH
FBgn0000427	dec-1	X:7761194-7767255	-	Known	YES	0.00418746	0.20578	0.563935	0.764708	0.968455	0.368179	0.489014	0.408749	0.0793524	0.165585	9.79091e-05	0.00638638	BOTH
FBgn0000439	Dfd	3R:2617558-2628150	+	Known	YES	2.52572e-05	0.921804	1	0.447842	0.898165	2.04706e-06	9.67553e-06	0.139755	0.0130154	0.0338795	0.999999	1	BASELINE
FBgn0000442	Pkg21D	2L:786153-790798	-	Known	YES	7.01203e-05	0.870078	1	0.538015	0.927589	4.70934e-09	2.75028e-08	0.43672	1.3584e-11	1.57099e-10	1	1	BOTH
FBgn0000447	Dhod	3R:4477113-4478638	-	Known	YES	0.0213907	0.00407714	0.0417625	0.681026	0.953856	5.97855e-13	4.6708e-12	0.465039	9.14798e-16	1.71057e-14	1	1	BOTH
FBgn0000448	Hr3	2R:6091500-6124853	-	Known	YES	0.014848	0.0168973	0.119417	0.8627	0.983664	1.89547e-08	1.0567e-07	0.200308	0.000298612	0.00114628	1	1	BASELINE
FBgn0000449	dib	3L:4062292-4064551	+	Known	YES	0.00264097	0.315175	0.691677	0.898298	0.987866	0.236652	0.351227	0.58196	1.5462e-05	7.72109e-05	5.47785e-06	0.000559926	BOTH
FBgn0000451	ect	3L:10183376-10194937	-	Known	YES	0.00439171	0.19504	0.549316	0.565136	0.935086	0.00470387	0.013618	0.378314	0.000113707	0.000480255	0.0707114	0.531199	BOTH
FBgn0000454	Dip-B	3R:9608010-9611398	+	Known	YES	0.0113174	0.0371789	0.203643	0.125521	0.740776	0	0	0.482981	1.15179e-07	8.12116e-07	0.0465851	0.43193	BOTH
FBgn0000455	Dip-C	3R:8237531-8239481	-	Known	YES	0.0472932	1.71421e-05	0.000436387	0.727097	0.962315	3.94861e-07	1.9907e-06	0.880743	6.28156e-50	3.90003e-47	0.999999	1	BOTH
FBgn0000459	disco	X:16104631-16110783	-	Known	YES	2.54244e-05	0.921546	1	0.35687	0.868996	2.53131e-14	2.27086e-13	0.419804	5.74829e-07	3.63765e-06	0.174965	0.822972	BOTH
FBgn0000463	Dl	3R:15128453-15151939	-	Known	YES	0.0188682	0.00702324	0.0633831	0.0339084	0.664932	0	0	0.354444	0.00153206	0.00499274	0.0391894	0.394566	BOTH
FBgn0000464	Lar	2L:19586623-19732069	+	Known	YES	0.0129524	0.0257364	0.159324	0.696806	0.95665	0.0423159	0.0895876	0.574935	8.64159e-15	1.43571e-13	0.38673	1	BOTH
FBgn0000473	Cyp6a2	2R:2667254-2668996	-	Known	YES	0.00975116	0.0531776	0.256778	0.125928	0.741237	9.0838e-10	5.58731e-09	0.950645	3.59777e-51	2.6805e-48	0.000317397	0.0168628	BOTH
FBgn0000477	DNaseII	3R:13845097-13846883	+	Known	YES	9.77176e-05	0.846894	1	0.403172	0.881778	8.96911e-08	4.77384e-07	0.667103	2.03461e-20	6.15099e-19	0.44573	1	BOTH
FBgn0000479	dnc	X:3070473-3237800	+	Known	YES	0.000176903	0.79502	1	0.783869	0.970648	6.37955e-08	3.42985e-07	0.18138	0.37055	0.594817	0.122164	0.697395	BASELINE
FBgn0000482	dor	X:1559085-1562484	+	Known	YES	0.00162652	0.430667	0.794762	0.379197	0.875408	0.177547	0.281409	0.129763	0.00389059	0.011495	1	1	NONE
FBgn0000489	Pka-C3	3L:15918905-15947897	-	Known	YES	0.0348683	0.000233562	0.00407634	0.56486	0.93498	0.01184	0.0304505	0.577805	2.85864e-13	3.98841e-12	0.151346	0.768201	BOTH
FBgn0000490	dpp	2L:2428372-2459823	+	Known	YES	0.00367071	0.23623	0.602502	0.384299	0.877636	6.54254e-13	5.08888e-12	0.391037	0.000201594	0.000805396	0.0354989	0.372658	BOTH
FBgn0000492	Dr	3R:25382108-25390966	+	Known	YES	0.0017669	0.411429	0.778952	0.730623	0.962833	2.44657e-07	1.25746e-06	0.201383	0.000304968	0.00116817	1	1	BASELINE
FBgn0000497	ds	2L:640013-714983	-	Known	YES	0.00366846	0.236374	0.602654	0.567271	0.935667	0	0	0.389013	0.000113412	0.000479126	0.0508578	0.449305	BASELINE
FBgn0000499	dsh	X:11249914-11252757	+	Known	YES	0.000164093	0.802423	1	0.0145423	0.640933	7.34135e-09	4.22553e-08	0.245041	0.000371022	0.0013925	0.720624	1	BASELINE
FBgn0000500	Dsk	3R:15414-15982	-	Known	YES	0.0054568	0.148512	0.476018	0.0981061	0.716789	3.35673e-05	0.000140472	0.316266	0.00454266	0.0131886	0.0679972	0.521312	BOTH
FBgn0000504	dsx	3R:3750045-3793130	-	Known	YES	0.00107314	0.522161	0.864092	0.979107	0.997334	2.66454e-15	2.6143e-14	0.614179	3.71611e-11	4.07423e-10	0.00436065	0.104953	BOTH
FBgn0000520	dwg	X:2621731-2624075	+	Known	YES	0.000700587	0.605103	0.914732	0.0821731	0.702796	5.73105e-07	2.84903e-06	0.227669	7.53806e-05	0.000329761	1	1	BASELINE
FBgn0000524	dx	X:6428032-6432608	+	Known	YES	0.0310365	0.000524047	0.00795814	0.0624818	0.685568	2.88658e-15	2.8206e-14	0.344699	0.0202984	0.0502879	0.00943889	0.176447	BASELINE
FBgn0000527	e	3R:17055561-17062899	-	Known	YES	0.0158078	0.0136809	0.102682	0.348314	0.865389	1.08403e-08	6.15491e-08	0.537859	5.46633e-06	2.95406e-05	0.000346812	0.0179438	BOTH
FBgn0000529	bsh	2L:19765776-19769067	-	Known	YES	0.00651369	0.114346	0.409362	0.114009	0.729095	0.618233	0.717624	0.0955427	0.0685152	0.145811	1	1	NONE
FBgn0000533	ea	3R:11154451-11156130	+	Known	YES	0.0107069	0.042713	0.222963	0.0745682	0.696501	1.40311e-10	9.10484e-10	0.303379	5.61085e-07	3.55874e-06	1	1	BASELINE
FBgn0000535	eag	X:14849510-14904022	+	Known	YES	0.00209348	0.371242	0.746075	0.0603781	0.685423	0	0	0.354004	2.73181e-06	1.55924e-05	0.452292	1	BOTH
FBgn0000536	eas	X:16172361-16179651	+	Known	YES	0.000560495	0.643736	0.938637	0.410905	0.885368	1.1191e-13	9.39342e-13	0.363428	5.83109e-09	4.84186e-08	1	1	BASELINE
FBgn0000541	E(bx)	3L:233926-246912	-	Known	YES	0.000632287	0.623273	0.926631	0.244442	0.817469	5.55112e-16	5.86727e-15	0.2723	0.00738988	0.0203985	0.164333	0.798491	BASELINE
FBgn0000542	ec	X:3705731-3751654	+	Known	YES	0.0120222	0.031707	0.183033	0.0612505	0.685423	5.56521e-12	4.02164e-11	0.506893	1.73002e-08	1.36028e-07	0.0424578	0.411292	BOTH
FBgn0000543	ecd	3L:2263581-2265857	-	Known	YES	0.0033972	0.254535	0.625232	0.114356	0.729173	1.23878e-06	5.98426e-06	0.286911	2.19549e-07	1.48734e-06	1	1	BASELINE
FBgn0000546	EcR	2R:1975378-2056592	-	Known	YES	0.00843809	0.0721773	0.311248	0.728776	0.962588	4.23547e-05	0.00017478	0.486802	4.61517e-11	5.00429e-10	0.452015	1	BOTH
FBgn0000547	ed	2L:4031377-4115749	+	Known	YES	0.00109309	0.518316	0.861124	0.771638	0.968685	0	0	0.285452	3.57637e-06	2.0013e-05	1	1	BASELINE
FBgn0000551	Edg78E	3L:21289863-21290903	-	Known	YES	0.0149388	0.0165624	0.117666	0.037973	0.670318	0.339086	0.459816	0.0873271	0.224745	0.397752	0.811161	1	NONE
FBgn0000552	Edg84A	3R:2510173-2510855	+	Known	RARE	0.00900338	0.0632383	0.286939	0.518787	0.921455	0.191007	0.298236	0.075632	0.869886	1	0.444827	1	NONE
FBgn0000556	Ef1alpha48D	2R:7778640-7783267	+	Known	YES	0.00358694	0.241661	0.610286	0.121634	0.737503	0	0	0.398892	9.14527e-09	7.43485e-08	0.723564	1	BOTH
FBgn0000557	eEF1alpha2	3R:27564190-27569028	+	Known	YES	0.0425783	4.61589e-05	0.00102352	0.676381	0.953166	0.0359263	0.0780923	0.55438	5.37856e-07	3.41917e-06	0.000634098	0.0280467	BOTH
FBgn0000559	eEF2	2L:21677913-21682164	-	Known	YES	7.87626e-07	0.98617	1	0.724712	0.962117	0	0	0.404606	2.57659e-10	2.56032e-09	1	1	BOTH
FBgn0000560	eg	3L:21801803-21810700	+	Known	YES	0.00206907	0.374049	0.748102	0.57624	0.936742	0.752807	0.823426	0.0534775	0.263636	0.453185	0.999999	1	NONE
FBgn0000562	egl	2R:19622427-19634352	-	Known	YES	0.0110822	0.0392165	0.210954	0.742215	0.964459	5.55112e-15	5.26908e-14	0.411519	3.61969e-10	3.54431e-09	0.997425	1	BASELINE
FBgn0000564	Eh	3R:13272364-13274580	-	Known	YES	0.000953315	0.546368	0.8785	0.582729	0.938062	0.998336	0.999171	0.387344	5.52811e-06	2.98552e-05	0.184224	0.841679	BOTH
FBgn0000565	Eip71CD	3L:15504152-15506302	+	Known	YES	0.000715143	0.601376	0.912525	0.00987654	0.640933	0.241846	0.356955	0.277428	4.45226e-07	2.87225e-06	0.999999	1	NONE
FBgn0000566	Eip55E	2R:14515423-14516900	+	Known	YES	0.00154189	0.442928	0.804794	0.209499	0.799683	0	0	0.39556	4.50324e-10	4.34225e-09	0.999999	1	BOTH
FBgn0000567	Eip74EF	3L:17551772-17612425	-	Known	YES	0.000506634	0.660159	0.947341	0.01949	0.650879	1.75581e-11	1.21787e-10	0.282073	0.000494574	0.00180078	0.382188	1	BASELINE
FBgn0000568	Eip75B	3L:17944053-18057796	-	Known	YES	0.000867806	0.564946	0.891666	0.414377	0.886352	0	0	0.24355	0.000270032	0.00104663	0.785597	1	BASELINE
FBgn0000575	emc	3L:749400-753492	+	Known	YES	0.0482825	1.39246e-05	0.000366156	0.674942	0.953166	0.000510226	0.00181171	0.416874	1.42773e-06	8.5022e-06	0.138482	0.736614	BOTH
FBgn0000576	ems	3R:9727575-9730342	+	Known	YES	0.000756022	0.591163	0.907334	0.803344	0.973721	0.0396165	0.0847279	0	1	1	1	1	NONE
FBgn0000577	en	2R:7411511-7415715	-	Known	YES	0.000913283	0.55492	0.884973	0.302614	0.845307	2.93029e-05	0.000123335	0.217444	0.0224456	0.0549977	0.309477	1	BASELINE
FBgn0000578	ena	2R:15029137-15051210	+	Known	YES	0.043302	3.96487e-05	0.000901833	0.959854	0.994789	8.44547e-13	6.5041e-12	0.416089	1.84735e-07	1.26426e-06	0.270408	0.993642	BOTH
FBgn0000579	Eno	2L:1724768-1729636	-	Known	YES	0.00604557	0.128264	0.436931	0.047121	0.679301	0.180068	0.284635	0.320341	1.15835e-07	8.16225e-07	1	1	BASELINE
FBgn0000581	E(Pc)	2R:7339548-7352775	+	Known	YES	0.0102712	0.0471867	0.237368	0.606065	0.942617	1.0427e-10	6.82426e-10	0.25059	0.00467525	0.0135373	0.314086	1	BASELINE
FBgn0000588	esc	2L:11827204-11829405	-	Known	YES	0.0182887	0.00796316	0.0696392	0.391439	0.881643	0	0	0.325994	0.000668164	0.00236104	0.134162	0.727473	BASELINE
FBgn0000591	E(spl)m8-HLH	3R:21865962-21866730	+	Known	YES	0.000450001	0.678593	0.958348	0.953047	0.993422	0.961489	0.974456	0.143386	0.79221	1	0.135441	0.730055	ETOH
FBgn0000592	Est-6	3L:12181918-12183805	+	Known	YES	0.00422571	0.203717	0.560841	0.106592	0.722409	2.78483e-06	1.29905e-05	0.849917	3.65961e-34	4.36639e-32	0.076419	0.552363	BOTH
FBgn0000594	Est-P	3L:12183833-12185628	+	Known	YES	0.00118889	0.500522	0.848096	0.323866	0.85433	2.36663e-05	0.000100737	0.319042	1.21513e-07	8.53726e-07	0.999999	1	BASELINE
FBgn0000611	exd	X:15886501-15890542	+	Known	YES	5.62233e-05	0.88356	1	0.810792	0.974625	0	0	0.190745	0.000253212	0.000987375	1	1	BASELINE
FBgn0000615	exu	2R:16554932-16558588	-	Known	YES	2.52747e-06	0.975228	1	0.0511818	0.679301	2.28706e-14	2.06001e-13	0.323275	0.000829325	0.00286588	0.130681	0.719312	BASELINE
FBgn0000617	e(y)1	X:17736194-17737381	+	Known	YES	0.0380029	0.000120756	0.00232143	0.026754	0.659914	2.5726e-09	1.5277e-08	0.188813	0.100018	0.201727	0.2585	0.973463	NONE
FBgn0000618	e(y)2	X:11470151-11470653	-	Known	YES	5.67174e-06	0.962899	1	0.105389	0.722409	3.72058e-08	2.03192e-07	0.197333	0.238064	0.417096	0.121266	0.695015	NONE
FBgn0000625	eyg	3L:12455637-12461121	-	Known	YES	0.00500271	0.166594	0.505604	0.626105	0.945216	1.77636e-15	1.77774e-14	0.0796024	0.0982962	0.198744	1	1	BASELINE
FBgn0000629	E(z)	3L:10627675-10631230	-	Known	YES	0.0181588	0.00819087	0.0709417	0.215273	0.804583	1.31539e-12	9.99018e-12	0.476173	4.6196e-10	4.44551e-09	0.337626	1	BOTH
FBgn0000633	CG17716	2R:9510549-9636872	+	Known	YES	0.00690347	0.104019	0.387484	0.0168054	0.643733	7.79226e-10	4.81766e-09	0.402461	2.27294e-07	1.53577e-06	0.341796	1	BASELINE
FBgn0000635	Fas2	X:4026920-4100126	-	Known	YES	0.0102986	0.0468911	0.236506	0.0661871	0.687533	0.00112634	0.00374955	0.478218	7.10521e-07	4.43895e-06	0.024735	0.305114	BOTH
FBgn0000636	Fas3	2L:18320102-18393441	+	Known	YES	0.010233	0.0476015	0.238877	0.0424653	0.672871	0.0195749	0.0468691	0.529577	1.41771e-11	1.63563e-10	0.218649	0.907002	BOTH
FBgn0000639	Fbp1	3L:14087689-14091153	-	Known	YES	0.00443605	0.192796	0.546142	0.564309	0.93498	0.0376701	0.0812616	0.349143	1.58337e-08	1.25113e-07	0.999999	1	BOTH
FBgn0000640	Fbp2	2L:9426784-9427917	+	Known	YES	0.0046616	0.181835	0.530305	0.440351	0.895391	0.769481	0.83587	0.268711	0.0771274	0.161505	0.0433406	0.41574	BOTH
FBgn0000644	Fcp3C	X:3067409-3068507	-	Known	YES	0.000776889	0.586086	0.904807	0.702474	0.958147	0.197727	0.306296	0.206013	0.145681	0.277878	0.142218	0.745953	BASELINE
FBgn0000658	fj	2R:14120266-14123816	+	Known	YES	0.00889018	0.0649292	0.291334	0.222323	0.80891	0.0179558	0.0434988	0.149417	0.00814017	0.022257	1	1	BASELINE
FBgn0000659	fkh	3R:24406698-24410986	-	Known	YES	0.0094472	0.0570462	0.268433	0.71877	0.96073	0	0	0.306427	5.62866e-06	3.03445e-05	0.781126	1	BASELINE
FBgn0000662	fl(2)d	2R:9707129-9712058	-	Known	YES	0.00191131	0.392927	0.763667	0.43196	0.892177	0	0	0.530798	3.70678e-11	4.06799e-10	0.161415	0.792401	BOTH
FBgn0000667	Actn	X:1917855-1936344	-	Known	YES	0.00778831	0.0841497	0.341377	0.929388	0.990599	0.000176282	0.000673229	0.280346	6.67665e-08	4.87687e-07	0.999999	1	BASELINE
FBgn0000709	fliI	X:21210768-21216115	+	Known	YES	0.00299609	0.284656	0.660009	0.300293	0.845307	7.95827e-07	3.90412e-06	0.131035	0.244243	0.426075	0.438219	1	NONE
FBgn0000711	flw	X:10279993-10303850	+	Known	YES	0.00333475	0.258955	0.630135	0.121944	0.737701	0	0	0.122048	0.351754	0.570632	0.410443	1	NONE
FBgn0000715	FMRFa	2R:5793799-5797962	+	Known	YES	0.0103354	0.0464977	0.235275	0.23673	0.813008	0.159501	0.258765	0.436426	1.72047e-08	1.35372e-07	0.327825	1	BOTH
FBgn0000719	fog	X:22226153-22257030	-	Known	YES	0.0220372	0.00354906	0.0375187	0.4894	0.912327	1.82077e-14	1.65244e-13	0.513262	7.69629e-11	8.13986e-10	0.21585	0.901894	BOTH
FBgn0000721	for	2L:3622074-3656953	-	Known	YES	0.00905747	0.062447	0.284465	0.422086	0.890006	3.07088e-13	2.46878e-12	0.302256	4.87953e-07	3.12206e-06	1	1	BASELINE
FBgn0000723	FER	3R:5193325-5220268	-	Known	YES	0.00164013	0.428743	0.793135	0.285467	0.837832	1.08257e-07	5.72295e-07	0.679974	8.00028e-17	1.666e-15	0.0278132	0.326679	BOTH
FBgn0000808	gd	X:11879567-11881797	-	Known	YES	0.00951022	0.0562203	0.266266	0.151478	0.759899	1.24123e-12	9.44405e-12	0.215167	0.0317062	0.0745503	0.276804	1	BASELINE
FBgn0000810	fs(1)K10	X:2136171-2140074	+	Known	YES	0.00992967	0.0510354	0.249863	0.207885	0.799442	0	0	0.374089	4.39114e-06	2.41942e-05	0.268848	0.991609	BOTH
FBgn0000826	png	X:1250521-1251634	-	Known	YES	0.000977064	0.54141	0.875463	0.0391102	0.671288	1.22716e-07	6.46184e-07	0.381905	2.16393e-05	0.000105481	0.128874	0.715003	BOTH
FBgn0000927	fs(1)Ya	X:2618319-2620610	+	Known	YES	0.0107795	0.0420119	0.220644	0.425941	0.890892	1.86544e-11	1.29125e-10	0.329641	8.39017e-06	4.38568e-05	0.517749	1	BOTH
FBgn0000928	fs(1)Yb	X:2614501-2618191	+	Known	YES	0.00656515	0.11292	0.406614	0.371134	0.873312	0.406614	0.527137	0.336047	2.88249e-07	1.91179e-06	0.907661	1	BOTH
FBgn0000964	tj	2L:19464267-19467758	+	Known	YES	0.126924	6.19929e-13	7.58553e-11	0.753283	0.966888	0.247993	0.363434	0.36373	2.78134e-06	1.58507e-05	0.377395	1	BASELINE
FBgn0000996	dup	2R:11264124-11268493	-	Known	YES	0.00304547	0.280716	0.656494	0.0224153	0.655419	7.10543e-15	6.67822e-14	0.399623	0.000505227	0.00183362	0.0153926	0.233621	BOTH
FBgn0001075	ft	2L:4198404-4221796	-	Known	YES	0.00703081	0.10087	0.379773	0.39266	0.881742	0	0	0.635205	9.46564e-12	1.11784e-10	0.00237738	0.0716785	BOTH
FBgn0001077	ftz	3R:2690046-2691966	+	Known	YES	0.0047382	0.178278	0.524907	0.389939	0.880574	0.454276	0.573466	0.0537564	1	1	0.516954	1	NONE
FBgn0001078	ftz-f1	3L:18743707-18794409	-	Known	YES	9.87555e-05	0.846093	1	0.0997608	0.717754	0	0	0.293621	0.000247623	0.000967044	0.384948	1	BASELINE
FBgn0001079	fu	X:18551788-18555237	+	Known	YES	0.00106965	0.522838	0.864316	0.102223	0.72035	1.33227e-15	1.35228e-14	0.207219	0.00114639	0.00383735	0.878007	1	BASELINE
FBgn0001083	fw	X:11886948-11897947	-	Known	YES	0.0272468	0.00116885	0.0154955	0.127802	0.74378	2.11471e-05	9.04847e-05	0.531938	4.54682e-12	5.54332e-11	0.274849	1	BOTH
FBgn0001084	fy	2L:8401476-8403280	-	Known	YES	0.0710463	1.14291e-07	4.95711e-06	0.2539	0.823558	8.68408e-11	5.71033e-10	0.265	0.000503101	0.00182746	0.505058	1	BASELINE
FBgn0001085	fz	3L:14267443-14361739	+	Known	YES	0.0449229	2.8206e-05	0.000671158	0.119541	0.735359	0	0	0.566762	1.7816e-13	2.55591e-12	0.240321	0.94713	BOTH
FBgn0001086	fzy	2L:16310956-16313097	+	Known	YES	0.00011756	0.832277	1	0.0229243	0.655419	2.22045e-16	2.42491e-15	0.349112	0.00284631	0.00866347	0.032383	0.35319	BASELINE
FBgn0001087	g	X:13621237-13630311	-	Known	YES	0.0111317	0.0387778	0.209559	0.194519	0.78873	0	0	0.362686	0.00050275	0.00182639	0.0551841	0.468628	BASELINE
FBgn0001089	Gal	2L:6003574-6006827	-	Known	YES	0.0293736	0.000744806	0.0106215	0.768583	0.968582	6.62825e-09	3.83087e-08	0.823909	4.57494e-27	2.69095e-25	0.00365218	0.0932668	BOTH
FBgn0001090	bnb	X:18688279-18691720	-	Known	YES	0.00142987	0.460003	0.818823	0.409731	0.884957	3.62669e-10	2.28911e-09	0.211409	0.113704	0.22476	0.148396	0.76094	BASELINE
FBgn0001091	Gapdh1	2R:3679406-3680885	-	Known	YES	0.0782667	2.46045e-08	1.22187e-06	0.887951	0.985863	8.70183e-05	0.000345639	0.26505	0.000339831	0.00128711	0.560395	1	BASELINE
FBgn0001092	Gapdh2	X:15762178-15763694	+	Known	YES	0.000249058	0.75788	0.999775	0.0466923	0.679301	0	0	0.613061	2.09915e-16	4.19418e-15	0.315416	1	BOTH
FBgn0001098	Gdh	3R:19761680-19768823	-	Known	YES	0.0128299	0.0264509	0.162183	0.331657	0.85833	4.18253e-06	1.91531e-05	0.470408	4.5749e-14	7.04884e-13	1	1	BOTH
FBgn0001099	gdl	3L:15502545-15504147	+	Known	YES	0.000108281	0.838938	1	0.954487	0.993959	1.88974e-08	1.05385e-07	0.0293444	0.720426	0.989137	0.904716	1	NONE
FBgn0001104	Galphai	3L:6965850-6973144	-	Known	YES	0.00647906	0.115316	0.411738	0.0509604	0.679301	2.22045e-16	2.42491e-15	0.336477	0.000766157	0.00267072	0.0958942	0.621254	BASELINE
FBgn0001105	Gbeta13F	X:15754148-15760208	+	Known	YES	0.00632725	0.119679	0.420859	0.189583	0.785822	0	0	0.0494805	0.254963	0.441285	1	1	BASELINE
FBgn0001108	DCTN1-p150	3L:13922487-13927756	+	Known	YES	0.00395775	0.2187	0.581426	0.183229	0.780318	7.2875e-13	5.63823e-12	0.397524	0.000535396	0.00193617	0.0160924	0.23978	BOTH
FBgn0001112	Gld	3R:3077785-3091425	-	Known	YES	1.93506e-05	0.93153	1	0.590154	0.940253	2.12933e-05	9.10519e-05	0.55913	5.77306e-08	4.2586e-07	0.00196923	0.0635441	BOTH
FBgn0001114	Glt	2L:8672698-8676804	+	Known	YES	0.000215543	0.774287	1	0.060626	0.685423	0.000188679	0.000717386	0.574728	3.33345e-08	2.53771e-07	0.00107869	0.0414935	BOTH
FBgn0001120	gnu	3L:14795480-14796460	-	Known	YES	0.0243148	0.00218079	0.0255024	0.016585	0.643733	8.88178e-15	8.27354e-14	0.607861	5.17546e-13	7.02217e-12	0.0390856	0.393994	BOTH
FBgn0001122	Galphao	2R:6325490-6353206	+	Known	YES	0.00550382	0.146769	0.47224	0.980619	0.997335	7.08771e-05	0.000284834	0.283584	0.0956397	0.194158	0.0225956	0.290779	BASELINE
FBgn0001123	Galphas	2R:19830061-19834459	+	Known	YES	0.0010134	0.533981	0.871324	0.107592	0.723632	0.114691	0.199917	0.290823	0.00173959	0.00558483	0.204727	0.881793	BASELINE
FBgn0001124	Got1	2R:12025857-12029433	+	Known	YES	0.00202179	0.37957	0.752713	0.2803	0.835949	0	0	0.494768	3.73474e-11	4.09065e-10	0.401446	1	BOTH
FBgn0001125	Got2	2L:1984512-1987758	-	Known	YES	5.58339e-06	0.963189	1	0.0425904	0.672871	0	0	0.502162	6.54716e-10	6.18329e-09	0.158916	0.787452	BOTH
FBgn0001128	Gpdh1	2L:5943643-5948968	+	Known	YES	0.0354679	0.000205859	0.00366339	0.363513	0.870919	2.65716e-06	1.24139e-05	0.613265	2.06664e-14	3.28772e-13	0.0934434	0.612838	BOTH
FBgn0001133	grau	2R:16897269-16899426	-	Known	YES	0.00577018	0.137323	0.45445	0.110612	0.725066	2.3495e-11	1.61298e-10	0.166547	0.00249768	0.00771368	1	1	BASELINE
FBgn0001134	Grd	3L:17816433-17832867	+	Known	YES	0.00168234	0.42286	0.787536	0.387187	0.879453	0.638119	0.733443	0.0756875	1	1	0.374754	1	NONE
FBgn0001137	grk	2L:8431086-8433598	-	Known	YES	0.0842086	6.91124e-09	3.90747e-07	0.313691	0.850308	0.000102059	0.000402092	0.560197	4.83378e-17	1.02897e-15	1	1	BOTH
FBgn0001138	grn	3R:3973090-4007166	-	Known	YES	0.00155172	0.441476	0.80381	0.597841	0.941087	1.09968e-12	8.39944e-12	0.223053	0.0554904	0.121557	0.176594	0.826216	BASELINE
FBgn0001139	gro	3R:21867458-21875633	+	Known	YES	0.00741917	0.0918887	0.359196	0.0690466	0.688979	1.26565e-14	1.16474e-13	0.353476	1.52607e-05	7.62931e-05	0.284227	1	BASELINE
FBgn0001142	Gs1	2L:132077-134472	+	Known	YES	0.0105187	0.044588	0.228928	0.967354	0.99554	1.32117e-14	1.21382e-13	0.680875	4.57115e-16	8.82817e-15	0.0133729	0.214908	BOTH
FBgn0001145	Gs2	X:11316865-11324230	+	Known	YES	3.57543e-05	0.907024	1	0.784565	0.970732	6.39488e-13	4.97981e-12	0.376229	1.72895e-08	1.35976e-07	0.875074	1	BOTH
FBgn0001147	gsb-n	2R:20927906-20939854	-	Known	YES	0.008695	0.0679585	0.299448	0.764193	0.968455	0.774479	0.839938	0.120448	1	1	0.13789	0.735216	NONE
FBgn0001148	gsb	2R:20949487-20952166	+	Known	YES	0.00125367	0.489069	0.840096	0.995325	0.999372	0.296797	0.416857	0.0986016	0.918215	1	0.286441	1	NONE
FBgn0001149	GstD1	3R:8193539-8194990	-	Known	YES	0.259704	9.05114e-27	5.41889e-24	0.0971575	0.716789	0.169428	0.271299	0.945132	3.08804e-64	1.29416e-60	1	1	BOTH
FBgn0001150	gt	X:2321146-2323000	-	Known	YES	0.000314851	0.728889	0.986176	0.89847	0.987915	0.641442	0.736232	0.151901	0.198952	0.359836	0.34764	1	NONE
FBgn0001168	h	3L:8668859-8672353	+	Known	YES	0.00690757	0.103916	0.387241	0.191132	0.78666	0.000260313	0.000970699	0.229473	0.00353678	0.0105402	0.495394	1	BASELINE
FBgn0001169	H	3R:16447660-16454637	+	Known	YES	0.000178876	0.793906	1	0.67767	0.953166	1.15083e-05	5.06046e-05	0.272262	0.00212973	0.00669699	0.278479	1	BOTH
FBgn0001170	H2.0	2L:6013059-6019402	-	Known	YES	0.00299948	0.284383	0.659624	0.332228	0.858961	0.630101	0.72737	0.0341727	1	1	0.637053	1	NONE
FBgn0001174	halo	2L:1517533-1518148	-	Known	YES	0.0123748	0.0292903	0.17344	0.629239	0.946082	0.217025	0.328596	0.145974	1	1	0.0795182	0.563281	NONE
FBgn0001179	hay	3L:10624179-10627069	+	Known	YES	0.0324465	0.00038913	0.00621847	0.059068	0.685423	0	0	0.246132	0.000241657	0.000945862	0.779657	1	BASELINE
FBgn0001180	hb	3R:4516702-4523544	-	Known	YES	0.0104676	0.045112	0.230628	0.0650963	0.687533	5.55112e-16	5.86727e-15	0.319894	0.00215839	0.00677568	0.0910145	0.604486	BOTH
FBgn0001185	her	2L:16677185-16679691	+	Known	YES	0.00308921	0.277283	0.652737	0.132845	0.748766	0	0	0.188403	0.00995597	0.0266332	0.651879	1	BASELINE
FBgn0001186	Hex-A	X:9479708-9483846	+	Known	YES	0.046243	2.13745e-05	0.000528482	0.606888	0.942617	2.99804e-06	1.39346e-05	0.320125	1.33315e-05	6.74054e-05	0.539263	1	BOTH
FBgn0001187	Hex-C	2R:11106342-11107834	-	Known	YES	0.0272704	0.00116303	0.0154599	0.639706	0.947423	1.17684e-14	1.08688e-13	0.510125	7.0698e-09	5.81239e-08	0.0539316	0.462328	BOTH
FBgn0001189	hfw	X:1563603-1567641	+	Known	YES	0.00296415	0.287242	0.662244	0.414443	0.886381	0.00268441	0.00822177	0.33615	1.07581e-06	6.5425e-06	0.725871	1	BOTH
FBgn0001197	His2Av	3R:22692651-22694942	+	Known	YES	0.000356207	0.712374	0.97756	0.0525225	0.679301	0	0	0.286991	0.000173777	0.0007045	0.476915	1	BASELINE
FBgn0001202	hook	2L:19030844-19033498	-	Known	YES	0.0072664	0.0953138	0.367224	0.181786	0.779905	0	0	0.249461	4.63295e-06	2.5393e-05	0.999999	1	BASELINE
FBgn0001206	Hmr	X:10484953-10489888	-	Known	YES	0.00129939	0.481245	0.83362	0.0358147	0.667241	1.11022e-16	1.26222e-15	0.366526	0.000557326	0.0020079	0.0463731	0.430888	BASELINE
FBgn0001208	Hn	3L:7753553-7756266	+	Known	YES	0.00109254	0.518422	0.861135	0.015706	0.640933	7.68274e-14	6.54371e-13	0.612905	5.77954e-15	9.75684e-14	0.138261	0.736368	BOTH
FBgn0001215	Hrb98DE	3R:24425556-24431499	+	Known	YES	0.0125351	0.028256	0.169269	0.395206	0.881742	5.55112e-16	5.86727e-15	0.574048	1.21981e-09	1.11042e-08	0.00710071	0.146773	BOTH
FBgn0001216	Hsc70-1	3L:13967161-13970861	+	Known	YES	0.00023354	0.765317	1	0.678282	0.953166	3.70664e-07	1.8735e-06	0.472894	3.00102e-07	1.98687e-06	0.0445809	0.422341	BOTH
FBgn0001217	Hsc70-2	3R:8870481-8873110	+	Known	YES	0.0361833	0.000177078	0.00323714	0.425026	0.890729	0.127654	0.217324	0.888938	1.07374e-47	5.14275e-45	1	1	BOTH
FBgn0001218	Hsc70-3	X:11695729-11701150	-	Known	YES	0.00407565	0.211952	0.572474	0.501348	0.916194	1.11022e-16	1.26222e-15	0.378349	0.0521574	0.114954	0.000857405	0.0351421	BOTH
FBgn0001220	Hsc70-5	2R:10140103-10143697	-	Known	YES	0.00204112	0.377299	0.750379	0.601026	0.941977	4.21885e-15	4.04806e-14	0.299771	7.77825e-07	4.82839e-06	1	1	ETOH
FBgn0001222	Hsf	2R:14017808-14022139	-	Known	YES	0.00021794	0.773069	1	0.130206	0.744469	0	0	0.315227	1.06009e-05	5.44365e-05	0.61147	1	BASELINE
FBgn0001224	Hsp23	3L:9374982-9375865	+	Known	YES	8.21325e-06	0.955361	1	0.995391	0.999372	0.0237963	0.0552783	0.800778	7.46745e-33	7.82379e-31	0.707023	1	BOTH
FBgn0001225	Hsp26	3L:9369518-9370527	-	Known	YES	0.000452996	0.677585	0.957729	0.162701	0.767515	7.49845e-13	5.79474e-12	0.844779	1.36285e-30	1.1338e-28	0.00847406	0.164225	BOTH
FBgn0001226	Hsp27	3L:9377163-9378794	+	Known	YES	0.0109887	0.040059	0.213863	0.200463	0.792113	4.79172e-13	3.78326e-12	0.69782	5.68057e-17	1.19857e-15	0.0108444	0.191821	BOTH
FBgn0001227	Hsp67Ba	3L:9370902-9372634	-	Known	YES	0.00391887	0.220981	0.584754	0.853787	0.982414	0.000458342	0.00164157	0.414291	7.15208e-06	3.79051e-05	0.0803276	0.565312	BOTH
FBgn0001228	CG4456	3L:9365822-9368064	+	Known	YES	0.000154217	0.808341	1	0.502741	0.916574	0.0600703	0.119075	0.0758116	0.119154	0.234016	1	1	NONE
FBgn0001229	Hsp67Bc	3L:9364611-9365597	-	Known	YES	0.0129671	0.0256523	0.158973	0.487883	0.911882	0.634963	0.731044	0.166251	0.016523	0.0418499	0.745059	1	BASELINE
FBgn0001230	Hsp68	3R:19880802-19883032	-	Known	YES	0.0264303	0.00139013	0.0177889	0.22495	0.810304	0.0148341	0.0369733	0.437571	4.34362e-09	3.67842e-08	0.444306	1	BOTH
FBgn0001233	Hsp83	3L:3192969-3197059	+	Known	YES	0.00873165	0.0673784	0.297807	0.0669989	0.688197	0	0	0.2498	3.15124e-05	0.000148659	1	1	BASELINE
FBgn0001234	lncRNA:Hsromega	3R:17121849-17143558	+	Known	YES	0.0173761	0.00971039	0.0803455	0.124212	0.739557	0.124799	0.213602	0.667469	3.73495e-12	4.59192e-11	0.000380738	0.0191209	BOTH
FBgn0001235	hth	3R:6333283-6465290	-	Known	YES	5.21155e-05	0.887865	1	0.0665735	0.687533	4.78385e-05	0.000195937	0.356661	0.0340269	0.0793939	0.00365395	0.0932668	BOTH
FBgn0001247	Ide	3L:20364772-20368996	-	Known	YES	3.08191e-07	0.991349	1	0.123972	0.739557	3.4861e-14	3.07798e-13	0.260665	0.0011499	0.00384757	0.425097	1	BASELINE
FBgn0001248	Idh	3L:8349504-8354006	-	Known	YES	0.000978463	0.541121	0.875375	0.0168139	0.643733	3.41949e-14	3.02235e-13	0.460029	8.23055e-13	1.09372e-11	1	1	BOTH
FBgn0001250	if	X:16646222-16677467	-	Known	YES	6.18456e-05	0.87792	1	0.153903	0.761657	0	0	0.512552	1.29478e-07	9.05318e-07	0.0135089	0.216291	BOTH
FBgn0001253	ImpE1	3L:8365505-8384271	+	Known	YES	0.0088227	0.0659599	0.294152	0.640474	0.947423	0.0692991	0.133823	0.236549	0.00937725	0.0252828	0.31155	1	BASELINE
FBgn0001254	ImpE2	3L:3510974-3512681	-	Known	YES	0.000790194	0.582895	0.902777	0.431146	0.892177	0.87968	0.917341	0.153675	0.00789342	0.0216282	1	1	NONE
FBgn0001255	ImpE3	3R:3854175-3855268	-	Known	YES	0.000361031	0.71052	0.976653	0.944959	0.992629	0.0277603	0.0628914	0.114377	0.0211248	0.0521501	1	1	BASELINE
FBgn0001256	ImpL1	3L:13375865-13377099	+	Known	YES	0.00156777	0.439123	0.801529	0.904739	0.989081	0.647628	0.74101	0.159273	0.00779253	0.0213883	0.961571	1	NONE
FBgn0001257	ImpL2	3L:4224006-4236147	-	Known	YES	0.00208157	0.372608	0.747156	0.132461	0.74803	3.64504e-07	1.84403e-06	0.273813	0.00410717	0.0120632	0.207096	0.886303	BASELINE
FBgn0001258	Ldh	3L:6252205-6255794	-	Known	YES	0.00456761	0.186312	0.536883	0.183702	0.780648	0.000247679	0.000926475	0.54065	7.9949e-07	4.95096e-06	0.0011199	0.0426183	BOTH
FBgn0001259	in	3L:20360298-20363359	+	Known	YES	0.0047003	0.180028	0.527742	0.980576	0.997335	0.000792789	0.00271883	0.253309	3.9263e-05	0.000181945	1	1	BASELINE
FBgn0001263	inaD	2R:18743211-18746317	-	Known	YES	0.0107545	0.0422523	0.221446	0.992498	0.998619	1.4988e-14	1.36877e-13	0.423425	3.14309e-07	2.07547e-06	0.19399	0.860247	BOTH
FBgn0001269	inv	2R:7361970-7397200	+	Known	YES	0.000397019	0.697113	0.970481	0.163481	0.767658	0	0	0.0775657	0.163971	0.306478	0.991853	1	BASELINE
FBgn0001276	ix	2R:7246942-7247668	-	Known	YES	0.033713	0.000297928	0.00500684	0.00935608	0.640933	3.39284e-13	2.71719e-12	0.275576	0.0661849	0.141589	0.0396808	0.397546	BASELINE
FBgn0001280	janA	3R:25864344-25865255	-	Known	YES	0.013627	0.0221437	0.143596	0.354658	0.86796	0	0	0.439416	3.39128e-09	2.9094e-08	0.453077	1	BOTH
FBgn0001281	janB	3R:25863706-25864450	-	Known	YES	0.000486325	0.666622	0.951219	0.857098	0.982903	0.00434309	0.0126908	0.0381389	0.400249	0.632322	1	1	NONE
FBgn0001285	Jon44E	2R:4578953-4580349	+	Known	YES	0.0894802	2.22946e-09	1.42647e-07	0.0991558	0.717748	0.452275	0.571628	0.837652	1.89879e-44	6.56298e-42	1	1	BOTH
FBgn0001291	Jra	2R:5983985-5986061	+	Known	YES	0.0257704	0.00159947	0.0197807	0.0283526	0.660983	2.13074e-12	1.5962e-11	0.274079	0.0541005	0.118807	0.0483598	0.438798	BASELINE
FBgn0001296	kar	3R:8507908-8515089	-	Known	YES	0.0254944	0.00169622	0.0207249	0.0504239	0.679301	1.89769e-06	9.00125e-06	0.39362	2.38863e-10	2.38203e-09	0.999999	1	BOTH
FBgn0001297	kay	3R:25591717-25619835	+	Known	YES	0.0101011	0.0490632	0.243382	0.208964	0.799442	0.116605	0.202703	0.455731	6.24998e-07	3.93139e-06	0.0591878	0.484907	BOTH
FBgn0001301	kel	2L:18129884-18138083	-	Known	YES	0.0147008	0.0174554	0.122305	0.958024	0.994471	0	0	0.215356	0.000124656	0.000521439	0.999999	1	BASELINE
FBgn0001308	Khc	2R:12154465-12159476	-	Known	YES	0.000735039	0.59636	0.910067	0.0208707	0.654925	5.73274e-09	3.33169e-08	0.180126	0.00446126	0.012986	0.87871	1	BASELINE
FBgn0001311	kkv	3R:1203815-1218588	-	Known	YES	0.00560678	0.143034	0.465508	0.516508	0.921321	6.89396e-05	0.000277238	0.357034	3.82868e-07	2.49251e-06	0.662712	1	BOTH
FBgn0001313	kl-2	YHet:81209-148249	+	Known	YES	0	1	1	0.809308	0.974239	0.120587	0.208012	0.0331604	0.439436	0.680569	1	1	NONE
FBgn0001314	kl-3	YHet:34290-65839	+	Known	YES	0	1	1	0.441371	0.895551	0.19985	0.308867	0.0280839	0.511347	0.765662	0.999999	1	NONE
FBgn0001315	kl-5	YHet:311-33413	+	Known	YES	0	1	1	0.834162	0.97871	0.327848	0.448372	0.023665	0.999999	1	0.743907	1	NONE
FBgn0001316	klar	3L:434083-540614	-	Known	YES	0.013374	0.023426	0.149328	0.782932	0.970529	2.24731e-08	1.24477e-07	0.357258	2.07072e-08	1.61454e-07	0.999999	1	BOTH
FBgn0001319	kn	2R:10660155-10694566	-	Known	YES	0.00853133	0.0706149	0.306822	0.809105	0.974205	0.413971	0.534402	0.0657407	0.132143	0.255647	1	1	BASELINE
FBgn0001320	kni	3L:20685430-20688478	-	Known	YES	0.00612055	0.125914	0.432356	0.934177	0.991352	0.00266902	0.00818007	0.0833972	1	1	0.277518	1	NONE
FBgn0001321	knk	3R:5948087-5951386	-	Known	YES	0.00294799	0.288562	0.663967	0.65473	0.950488	0.00170911	0.00548472	0.415776	2.50738e-05	0.000120714	0.0438381	0.418616	BOTH
FBgn0001323	knrl	3L:20590241-20613759	-	Known	YES	0.000819708	0.575938	0.89818	0.0129702	0.640933	7.94753e-12	5.67347e-11	0.209605	0.0497553	0.110412	0.248091	0.95918	BASELINE
FBgn0001324	kto	3L:19829714-19838044	+	Known	YES	0.00496601	0.168161	0.508611	0.748667	0.965999	1.0255e-06	4.99358e-06	0.11985	0.00780044	0.0214032	1	1	NONE
FBgn0001325	Kr	2R:21114134-21118917	+	Known	YES	0.000640922	0.62091	0.92521	0.973137	0.996651	0.00341811	0.0102305	0.28313	0.239413	0.419044	0.00894849	0.170367	BASELINE
FBgn0001330	kz	X:2131891-2136068	-	Known	YES	0.10655	5.52429e-11	4.77352e-09	0.816858	0.975659	0	0	0.399253	5.24766e-09	4.38421e-08	0.789422	1	BOTH
FBgn0001332	L	2R:10368692-10384817	+	Known	YES	0.0155384	0.0145147	0.107141	0.788929	0.971306	0.527798	0.639979	0.449972	2.06441e-07	1.40278e-06	0.108872	0.659144	BOTH
FBgn0001341	Mybbp1A	X:523806-527666	+	Known	YES	0.0091655	0.0608976	0.279914	0.721122	0.96142	0	0	0.403062	5.58852e-07	3.54591e-06	0.263103	0.981369	BOTH
FBgn0001404	egh	X:2482536-2493144	+	Known	YES	0.000234431	0.764883	1	0.146173	0.755434	0.223179	0.335775	0.193345	0.400408	0.632484	0.0845342	0.58137	BASELINE
FBgn0001491	l(1)10Bb	X:11218327-11219341	-	Known	YES	0.00366919	0.236326	0.60258	0.12049	0.736523	0	0	0.186679	0.000194306	0.000779155	1	1	BASELINE
FBgn0001565	Hlc	X:21256545-21258973	-	Known	YES	0.000217894	0.773092	1	0.100375	0.718335	0	0	0.358666	6.21548e-09	5.14026e-08	1	1	BOTH
FBgn0001612	Grip91	X:13630603-13638716	-	Known	YES	0.00491218	0.170492	0.512639	0.0362876	0.667923	0	0	0.264168	3.09535e-05	0.000146186	0.934336	1	BASELINE
FBgn0001624	dlg1	X:11263698-11303809	+	Known	YES	2.11925e-05	0.928353	1	0.778417	0.970288	0.330298	0.450945	0.329834	1.29453e-07	9.05318e-07	1	1	BASELINE
FBgn0001941	ifc	2L:5986348-5988854	+	Known	YES	0.00264936	0.314407	0.690906	0.0595491	0.685423	0	0	0.183909	0.00478256	0.0138133	0.83067	1	BASELINE
FBgn0001942	eIF4A	2L:5981764-5985909	+	Known	YES	0.00379154	0.228652	0.593796	0.731702	0.962845	2.36515e-09	1.40875e-08	0.237166	3.47921e-06	1.94932e-05	1	1	NONE
FBgn0001961	Arpc1	2L:13827941-13829741	-	Known	YES	0.0484187	1.35319e-05	0.000357232	0.207435	0.798852	0.474259	0.592245	0.347973	3.96328e-08	2.98399e-07	1	1	BOTH
FBgn0001965	Sos	2L:13813816-13819826	+	Known	YES	0.0109619	0.0403036	0.214614	0.0399938	0.671288	0.053672	0.108706	0.333564	4.55258e-06	2.49974e-05	0.560614	1	BASELINE
FBgn0001967	NimC3	2L:14019357-14020208	-	Known	YES	0.00207346	0.373542	0.747642	0.83472	0.978882	0.475009	0.593005	0.0420887	0.507728	0.761808	0.938176	1	NONE
FBgn0001970	Pgant35A	2L:14359252-14361411	+	Known	YES	0.000110594	0.837251	1	0.0990284	0.717748	7.31547e-09	4.21208e-08	0.185135	0.00287148	0.00873533	0.915964	1	BASELINE
FBgn0001974	l(2)35Bd	2L:15009939-15011764	+	Known	YES	0.0143805	0.0187358	0.128247	0.172783	0.772636	0	0	0.195354	0.002092	0.0065895	0.879863	1	BASELINE
FBgn0001977	CIAPIN1	2L:15036293-15038861	-	Known	YES	0.000580118	0.637991	0.935494	0.741205	0.964365	9.87002e-11	6.46985e-10	0.355993	1.24148e-08	9.92679e-08	0.999999	1	BOTH
FBgn0001978	stc	2L:15113480-15118069	+	Known	YES	0.0509159	8.00566e-06	0.000224045	0.978985	0.997334	1.0726e-11	7.57144e-11	0.583262	1.06244e-17	2.40679e-16	0.956252	1	BOTH
FBgn0001981	esg	2L:15333866-15336138	+	Known	YES	0.00197037	0.385705	0.757756	0.534082	0.926372	0.503157	0.618061	0.264361	0.00422339	0.0123537	0.249689	0.961008	BASELINE
FBgn0001983	wor	2L:15423297-15425580	-	Known	YES	0.00361564	0.239783	0.607926	0.334235	0.859567	0.136804	0.229444	0.191673	0.141436	0.271019	0.19896	0.870485	NONE
FBgn0001986	Mtr4	2L:15752263-15755900	+	Known	YES	0.0208576	0.00457208	0.0458071	0.0956145	0.714997	0	0	0.372087	8.17516e-08	5.89438e-07	0.715125	1	BOTH
FBgn0001987	Gli	2L:15756002-15762758	-	Known	YES	0.0409672	6.47559e-05	0.00136717	0.640671	0.947423	0.109515	0.192597	0.659085	1.40904e-15	2.57583e-14	0.0295019	0.334951	BOTH
FBgn0001989	ND-B17	2L:15749319-15751078	-	Known	YES	0.00121716	0.495467	0.844108	0.439248	0.895203	4.25002e-06	1.94409e-05	0.218342	0.000160159	0.000653164	1	1	ETOH
FBgn0001990	wek	2L:15766133-15768349	-	Known	YES	0.000184031	0.791025	1	0.210109	0.799721	0	0	0.26685	0.000290854	0.00111918	0.567949	1	BASELINE
FBgn0001991	Ca-alpha1D	2L:16165831-16190540	+	Known	YES	0.0165809	0.01155	0.0909529	0.574276	0.936742	4.44089e-16	4.71912e-15	0.414188	9.19298e-06	4.76741e-05	0.0725213	0.537212	BOTH
FBgn0001992	Cyp303a1	2L:16294183-16296969	+	Known	YES	0.00871067	0.0677099	0.298738	0.235106	0.813008	0.148968	0.245444	0.239474	0.00135588	0.00446988	0.563909	1	BASELINE
FBgn0001994	crp	2L:16263556-16287730	-	Known	YES	0.00907552	0.0621852	0.283587	0.775251	0.969554	3.07754e-13	2.47354e-12	0.265608	0.000116887	0.000492134	0.714772	1	BASELINE
FBgn0001995	mRpL4	2L:16328059-16329132	-	Known	YES	0.046115	2.19567e-05	0.000540487	0.253751	0.823558	5.71553e-06	2.58518e-05	0.337371	6.35435e-07	3.99404e-06	0.785559	1	BOTH
FBgn0002021	l(2)37Bb	2L:19049843-19051612	-	Known	YES	0.0484204	1.3527e-05	0.000357232	0.209579	0.799683	3.33178e-13	2.6702e-12	0.39165	6.39876e-10	6.05507e-09	1	1	BASELINE
FBgn0002022	Catsup	2L:19041862-19043614	+	Known	YES	0.00911643	0.0615963	0.282084	0.770697	0.968602	1.88738e-15	1.88659e-14	0.210774	2.64944e-05	0.000126861	1	1	BASELINE
FBgn0002023	Lim3	2L:19079256-19108427	-	Known	YES	0.000579316	0.638223	0.935541	0.925367	0.990437	0.0101398	0.0266671	0.169768	0.174501	0.322958	0.27114	0.994911	BASELINE
FBgn0002031	l(2)37Cc	2L:19121345-19123869	-	Known	YES	0.0133833	0.023378	0.1491	0.521652	0.922613	1.88738e-15	1.88659e-14	0.280817	4.69096e-06	2.5669e-05	1	1	ETOH
FBgn0002036	CG10561	2L:19114401-19116570	+	Known	YES	0.00183325	0.402774	0.770809	0.346257	0.864378	0.00539286	0.0153736	0.370753	1.31838e-07	9.21053e-07	0.667429	1	BOTH
FBgn0002044	swm	2L:19493251-19497978	+	Known	YES	0.00399014	0.216821	0.579048	0.425752	0.8908	3.15359e-08	1.73209e-07	0.240756	0.196591	0.356245	0.0450714	0.424701	BASELINE
FBgn0002069	AspRS	2R:8764509-8770673	+	Known	YES	0.0189091	0.00696141	0.0629267	0.610377	0.943101	0	0	0.377208	1.11684e-08	8.9902e-08	0.922216	1	BOTH
FBgn0002121	l(2)gl	2L:9839-21376	-	Known	YES	1.57463e-05	0.938221	1	0.530044	0.925164	0	0	0.570061	1.50807e-12	1.9454e-11	0.120091	0.691567	BOTH
FBgn0002174	l(2)tid	2R:19594436-19596549	+	Known	YES	0.0102713	0.0471853	0.237368	0.675872	0.953166	0.527371	0.639678	0.473146	3.40733e-14	5.30647e-13	0.999999	1	BOTH
FBgn0002183	dre4	3L:1871574-1876312	-	Known	YES	0.00268883	0.310824	0.687491	0.223065	0.80891	0	0	0.420813	1.46338e-07	1.01411e-06	0.259726	0.975518	BOTH
FBgn0002283	l(3)73Ah	3L:16581575-16583232	+	Known	YES	0.0133008	0.0238112	0.151041	0.20194	0.793723	0	0	0.196168	0.0226392	0.0554356	0.444862	1	BASELINE
FBgn0002284	Prosbeta6	3L:16602500-16603518	-	Known	YES	0.0464966	2.02651e-05	0.000505152	0.358568	0.8698	2.50917e-06	1.17586e-05	0.157397	0.00266734	0.00817364	0.999999	1	NONE
FBgn0002306	sas	3R:2988600-3009424	+	Known	YES	0.00754038	0.0892661	0.353026	0.875574	0.984909	0	0	0.493672	2.46398e-09	2.14683e-08	0.134711	0.728344	BOTH
FBgn0002354	l(3)87Df	3R:8856635-8857320	+	Known	YES	0.00407245	0.212132	0.572578	0.360387	0.87001	2.55351e-14	2.2865e-13	0.209007	0.00114678	0.0038383	0.861309	1	BASELINE
FBgn0002413	dco	3R:26879807-26886932	-	Known	YES	0.0473205	1.70442e-05	0.000434556	0.0996599	0.717748	9.11493e-14	7.71455e-13	0.239834	0.0417734	0.0947332	0.141789	0.745103	BASELINE
FBgn0002431	hyd	3R:5540345-5551337	-	Known	YES	0.0118369	0.033059	0.188896	0.8198	0.976502	7.77156e-15	7.28592e-14	0.275699	0.0555873	0.121745	0.0451659	0.424891	BASELINE
FBgn0002440	l(3)mbn	3L:6117034-6121907	-	Known	RARE	0.00217225	0.362384	0.737908	0.907447	0.989224	0.00730148	0.0200357	0.16352	0.000466035	0.00170744	1	1	NONE
FBgn0002441	l(3)mbt	3R:23092048-23098995	-	Known	YES	0.0759231	4.05384e-08	1.90889e-06	0.0125861	0.640933	3.24338e-07	1.64755e-06	0.511929	1.41987e-11	1.63756e-10	0.341125	1	BOTH
FBgn0002466	sti	3L:12501098-12507915	-	Known	YES	0.00191924	0.391947	0.762921	0.0148936	0.640933	0	0	0.349154	0.000143096	0.000590543	0.142652	0.746947	BOTH
FBgn0002521	pho	4:1193095-1202254	-	Known	YES	0.000188023	0.788823	1	0.0562558	0.683125	0	0	0.163857	0.00354486	0.0105634	1	1	NONE
FBgn0002522	lab	3R:2487149-2504312	-	Known	YES	0.00856095	0.070126	0.30526	0.886242	0.985863	0.00876733	0.0235303	0.224544	0.460546	0.705304	0.0298985	0.337808	BASELINE
FBgn0002524	lace	2L:15499127-15505018	+	Known	YES	0.0138704	0.0209779	0.138614	0.103452	0.721901	0	0	0.312095	0.00401141	0.0118161	0.0818062	0.570472	BASELINE
FBgn0002525	Lam	2L:5542480-5546642	+	Known	YES	0.000950083	0.547049	0.878986	0.14555	0.755434	1.55431e-15	1.56486e-14	0.299632	3.579e-05	0.000167005	0.583721	1	BASELINE
FBgn0002526	LanA	3L:6196931-6211122	-	Known	YES	0.000487401	0.666276	0.951208	0.0101539	0.640933	0	0	0.635966	1.19812e-14	1.95567e-13	0.0424395	0.411234	BOTH
FBgn0002531	Lcp1	2R:4317620-4318748	-	Known	YES	0.0186151	0.00741897	0.0658554	0.51614	0.921048	0.157698	0.256667	0.492299	1.58597e-07	1.09477e-06	0.0285689	0.330399	BOTH
FBgn0002534	Lcp3	2R:4322815-4323600	+	Known	YES	0.0440875	3.36165e-05	0.00078377	0.748871	0.966021	0.000746018	0.00256895	0.270751	2.11142e-05	0.000103087	0.929659	1	BOTH
FBgn0002535	Lcp4	2R:4325152-4326000	+	Known	YES	0.00568937	0.140115	0.45967	0.753834	0.966888	0.990024	0.993611	0.284271	0.000894747	0.00306354	0.301563	1	ETOH
FBgn0002542	lds	3R:3746153-3750213	+	Known	YES	0.00398113	0.217342	0.579724	0.106582	0.722409	0	0	0.335862	0.000608294	0.0021733	0.108455	0.658742	BASELINE
FBgn0002543	robo2	2L:1380086-1420453	-	Known	YES	0.0423706	4.82177e-05	0.00106285	0.101315	0.718335	0	0	0.498464	5.94131e-07	3.75201e-06	0.0116099	0.198496	BOTH
FBgn0002552	lin	2R:4802029-4805739	+	Known	YES	0.00521264	0.157941	0.4919	0.110006	0.723886	8.54872e-14	7.24264e-13	0.364855	2.856e-05	0.000135859	0.178755	0.830577	BOTH
FBgn0002561	l(1)sc	X:303754-304850	+	Known	YES	6.1459e-05	0.878299	1	0.972058	0.996328	0.301298	0.421542	0.14555	0.491346	0.742244	0.209921	0.891195	NONE
FBgn0002562	Lsp1alpha	X:12384324-12387015	+	Known	YES	0.0158405	0.013583	0.102153	0.270162	0.83023	0.00988572	0.0260931	0.420342	5.50147e-06	2.97161e-05	0.0745011	0.546086	BOTH
FBgn0002563	Lsp1beta	2L:898500-901316	+	Known	YES	0.0117356	0.0338236	0.191711	0.19141	0.78666	0.946122	0.964101	0.83109	2.26719e-22	8.4835e-21	3.15636e-06	0.000364908	BOTH
FBgn0002564	Lsp1gamma	3L:66430-68995	+	Known	YES	0.000211728	0.776239	1	0.582156	0.938062	0.49209	0.608392	0.671928	1.03651e-13	1.52685e-12	0.00198936	0.0638863	BOTH
FBgn0002565	Lsp2	3L:12122493-12124969	+	Known	YES	0.00589267	0.133209	0.446654	0.0371159	0.669831	0.000756065	0.0026006	0.652709	8.69817e-07	5.35974e-06	8.80342e-08	1.55343e-05	BOTH
FBgn0002566	lt	2L:22817527-22835867	+	Known	YES	0.000270395	0.748059	0.994902	0.314341	0.850608	0	0	0.335529	8.08155e-08	5.83315e-07	1	1	BASELINE
FBgn0002567	Rab32	2R:5065369-5073847	-	Known	YES	0.00636084	0.118698	0.41864	0.1593	0.76527	1.39888e-14	1.28101e-13	0.463503	7.7052e-11	8.14671e-10	0.624898	1	BOTH
FBgn0002569	Mal-A2	2R:4341132-4343287	+	Known	YES	0.0183902	0.0077897	0.0685114	0.799857	0.972984	0	0	0.797014	6.5984e-19	1.69132e-17	4.45478e-06	0.000477275	BOTH
FBgn0002570	Mal-A1	2R:4337169-4339409	-	Known	YES	0.00160782	0.433332	0.796985	0.424458	0.890729	0	0	0.786928	1.01862e-21	3.54267e-20	0.000809877	0.0336808	BOTH
FBgn0002571	Mal-A3	2R:4343414-4345397	-	Known	YES	0.0106413	0.0433577	0.225163	0.657183	0.951133	0	0	0.806347	5.31225e-19	1.3732e-17	1.12559e-06	0.000150983	BOTH
FBgn0002573	sens	3L:13389328-13394225	-	Known	YES	0.000201336	0.781657	1	0.798082	0.972901	0.345077	0.466036	0.254823	0.487117	0.737483	0.01002	0.182873	BOTH
FBgn0002576	lz	X:9178682-9197669	+	Known	YES	0.00700897	0.101403	0.381084	0.815228	0.975305	0.136806	0.229444	0.0745553	0.362327	0.584363	0.772084	1	BASELINE
FBgn0002577	m	X:11648306-11663541	+	Known	YES	0.00122182	0.494644	0.843494	0.793095	0.971719	0.0579703	0.115747	0.360941	2.6999e-08	2.07804e-07	0.974686	1	BASELINE
FBgn0002578	Kaz-m1	3R:21840443-21842209	+	Known	YES	0.0205918	0.00484121	0.0478225	0.313126	0.849637	3.70542e-11	2.51043e-10	0.67476	7.02719e-16	1.32882e-14	0.0161987	0.240414	BOTH
FBgn0002579	RpL36	X:522371-523516	-	Known	YES	0.015991	0.0131419	0.0999568	0.163936	0.768258	0.0114034	0.029495	0.100073	0.0284953	0.0679007	1	1	NONE
FBgn0002590	RpS5a	X:17037621-17042297	-	Known	YES	0.00442016	0.193597	0.547413	0.72195	0.961481	0.0212256	0.0501942	0.146403	0.0352958	0.0819389	0.759265	1	ETOH
FBgn0002592	E(spl)m2-BFM	3R:21842236-21843192	-	Known	YES	0.00540336	0.15052	0.479339	0.96686	0.99554	0.0506769	0.103794	0.0624587	0.98533	1	0.484507	1	NONE
FBgn0002593	RpLP1	2L:419952-420864	+	Known	YES	0.0174041	0.00965143	0.0799761	0.610362	0.943101	0.989126	0.993153	0.0903607	0.0408741	0.0930021	1	1	NONE
FBgn0002607	RpL19	2R:20855400-20857070	-	Known	YES	0.0268067	0.00128332	0.0166961	0.438371	0.894877	2.77696e-05	0.000117279	0.0757624	0.0842563	0.174288	0.999999	1	NONE
FBgn0002609	E(spl)m3-HLH	3R:21847545-21848849	+	Known	YES	0.0109606	0.0403149	0.214614	0.409182	0.884775	0.174126	0.277195	0.54175	2.7168e-09	2.35486e-08	0.0228223	0.29218	BOTH
FBgn0002622	RpS3	3R:19184534-19185929	+	Known	YES	0.0496693	1.04042e-05	0.000282675	0.275193	0.832681	0.0054453	0.0155112	0.191585	0.000426399	0.00157887	1	1	ETOH
FBgn0002626	RpL32	3R:25870951-25871883	-	Known	YES	8.61552e-05	0.856132	1	0.463111	0.904344	1.56257e-05	6.7768e-05	0.0407353	0.344332	0.561116	1	1	NONE
FBgn0002629	E(spl)m4-BFM	3R:21849543-21850301	-	Known	YES	0.000107956	0.839177	1	0.384178	0.877516	0.99368	0.995925	0.13899	0.0188922	0.0471561	0.963665	1	NONE
FBgn0002631	E(spl)m5-HLH	3R:21854576-21855457	-	Known	YES	1.80932e-05	0.933786	1	0.737041	0.963859	0.877221	0.915631	0.211124	1	1	0.0100417	0.182873	ETOH
FBgn0002632	E(spl)m6-BFM	3R:21858633-21859769	+	Known	YES	0.0213009	0.00415655	0.0424283	0.274718	0.832576	0.232406	0.346547	0.0865493	0.080028	0.166694	0.999999	1	NONE
FBgn0002633	E(spl)m7-HLH	3R:21862760-21863741	+	Known	YES	0.00014741	0.812539	1	0.638015	0.947423	0.65666	0.748084	0.207977	0.554259	0.813816	0.0391383	0.394226	BASELINE
FBgn0002638	Rcc1	3L:5923362-5925873	-	Known	YES	0.00209454	0.371121	0.746004	0.172977	0.773171	1.11022e-16	1.26222e-15	0.29009	2.58264e-05	0.00012391	0.71508	1	BASELINE
FBgn0002641	mal	X:20300702-20304237	+	Known	YES	0.0107347	0.0424432	0.2221	0.0240173	0.655419	0	0	0.318066	0.00745727	0.0205541	0.0483114	0.43865	BASELINE
FBgn0002643	mam	2R:9878708-9947861	+	Known	YES	1.65894e-05	0.936592	1	0.465094	0.904568	0.0477112	0.0987702	0.380298	2.07967e-07	1.41229e-06	0.525064	1	BOTH
FBgn0002645	Map205	3R:27881001-27894163	-	Known	YES	0.00413892	0.208433	0.568002	0.335126	0.859692	9.14318e-06	4.05401e-05	0.902879	0.000543605	0.00196289	1.26228e-48	1.05801e-44	BOTH
FBgn0002673	twe	2L:16259414-16261877	-	Known	YES	0.000133545	0.821417	1	0.0321975	0.664932	0	0	0.292176	0.000892853	0.00305799	0.257757	0.972083	BASELINE
FBgn0002707	mei-9	X:4208263-4212834	-	Known	YES	0.0183647	0.00783299	0.068809	0.895949	0.987173	1.11022e-15	1.13688e-14	0.462349	2.65951e-09	2.30999e-08	0.29824	1	BOTH
FBgn0002709	mei-218	X:17030018-17037029	-	Known	YES	0.00781609	0.0835964	0.340507	0.728339	0.962489	5.26865e-07	2.62657e-06	0.103829	0.0202243	0.0501226	1	1	BASELINE
FBgn0002715	mei-S332	2R:18009606-18012071	+	Known	YES	0.00142105	0.461392	0.819859	0.082552	0.702796	0	0	0.245625	0.00161921	0.00524062	0.488653	1	BASELINE
FBgn0002716	mei-W68	2R:15343675-15347028	+	Known	YES	0.00349097	0.24807	0.617404	0.247874	0.820524	0.696329	0.779889	0.256053	3.00807e-05	0.000142506	1	1	BASELINE
FBgn0002719	Men	3R:8538825-8548164	-	Known	YES	0.0207432	0.00468602	0.0465781	0.587608	0.939713	0.86584	0.907313	0.602646	6.13527e-12	7.37266e-11	0.0187571	0.261001	BOTH
FBgn0002723	Met	X:11510157-11515313	+	Known	YES	0.0137127	0.0217257	0.142154	0.987014	0.997699	2.22045e-16	2.42491e-15	0.469536	1.04276e-12	1.36778e-11	0.999999	1	BOTH
FBgn0002732	E(spl)malpha-BFM	3R:21836615-21837290	+	Known	YES	0.00352398	0.245843	0.614965	0.770814	0.968658	0.326845	0.447434	0.284829	0.000746574	0.00260957	0.317612	1	BOTH
FBgn0002733	E(spl)mbeta-HLH	3R:21830768-21831745	-	Known	YES	0.000507852	0.659777	0.94713	0.149026	0.757697	1.39515e-06	6.69622e-06	0.404876	1.37223e-08	1.09254e-07	0.615465	1	BOTH
FBgn0002734	E(spl)mdelta-HLH	3R:21823343-21824355	+	Known	YES	2.28921e-05	0.925544	1	0.117737	0.732912	0.249025	0.364578	0.277169	0.155185	0.292906	0.0177727	0.25356	BASELINE
FBgn0002735	E(spl)mgamma-HLH	3R:21825573-21826483	+	Known	YES	1.81327e-05	0.933714	1	0.879292	0.98537	0.869909	0.910439	0.178293	0.312804	0.520439	0.151486	0.768557	NONE
FBgn0002736	mago	2R:17016082-17017242	+	Known	YES	0.075317	4.61199e-08	2.15357e-06	0.220817	0.808135	0	0	0.355311	7.77614e-06	4.08701e-05	0.334459	1	BASELINE
FBgn0002772	Mlc1	3R:23482800-23485899	-	Known	YES	0.00205013	0.376247	0.749774	0.54456	0.929804	6.3475e-05	0.000256533	0.306289	3.30449e-07	2.17491e-06	1	1	BASELINE
FBgn0002773	Mlc2	3R:25997160-26000273	-	Known	YES	1.0538e-05	0.949444	1	0.564117	0.93498	0.0340071	0.0745345	0.392342	8.3874e-11	8.83179e-10	1	1	BOTH
FBgn0002774	mle	2R:1862362-1868283	-	Known	YES	0.00252113	0.326425	0.703013	0.457443	0.902445	1.0287e-07	5.45021e-07	0.364817	1.69188e-07	1.16452e-06	0.692914	1	BASELINE
FBgn0002775	msl-3	3L:7116313-7118633	-	Known	YES	0.00750461	0.0900314	0.354824	0.0147714	0.640933	2.22045e-16	2.42491e-15	0.360522	0.00105808	0.0035735	0.0396766	0.397546	BASELINE
FBgn0002778	mnd	3L:14978200-14984767	+	Known	YES	0.0115605	0.0351878	0.196788	0.0588691	0.684563	0	0	0.410453	3.82857e-07	2.49251e-06	0.248838	0.959712	BOTH
FBgn0002780	mod	3R:27877782-27880696	+	Known	YES	0.00320902	0.268145	0.642059	0.633899	0.946814	0	0	0.342353	2.49987e-06	1.43713e-05	0.559319	1	BASELINE
FBgn0002781	mod(mdg4)	3R:17176568-17203123	.	Known	YES	0.00170842	0.419284	0.784361	0.00524459	0.608945	4.03169e-11	2.72267e-10	0.307496	0.000108041	0.000458343	0.384357	1	BASELINE
FBgn0002783	mor	3R:11793856-11798635	-	Known	YES	0.00150696	0.448145	0.809708	0.112208	0.727277	1.33227e-15	1.35228e-14	0.236021	0.000790042	0.00274598	0.67909	1	BASELINE
FBgn0002787	Rpn8	2R:20287551-20292050	+	Known	YES	3.95753e-05	0.902206	1	0.0459791	0.677578	0	0	0.188733	0.000623746	0.00222306	1	1	BASELINE
FBgn0002789	Mp20	2R:9134175-9136385	+	Known	YES	0.00496671	0.168132	0.508611	0.209669	0.799683	1.11022e-15	1.13688e-14	0.463585	3.62454e-11	3.98426e-10	0.709375	1	BOTH
FBgn0002791	mr	2R:19859954-19862931	+	Known	YES	0.00818035	0.0766921	0.323164	0.0364691	0.667923	0	0	0.259694	0.000142039	0.000586614	0.738812	1	BASELINE
FBgn0002838	ms(3)K81	3R:22701574-22702284	+	Known	YES	0.00952181	0.0560698	0.265779	0.477714	0.907493	0.0230422	0.0537577	0.0830032	0.370756	0.595009	0.691902	1	NONE
FBgn0002842	sa	3L:21398525-21399838	-	Known	YES	0.00055028	0.646775	0.940471	0.342905	0.863763	0.291604	0.41129	0.0663109	0.373035	0.597837	0.834742	1	NONE
FBgn0002855	Acp26Aa	2L:5892883-5893896	-	Known	YES	0.000580655	0.637835	0.935487	0.558705	0.933393	0.0297006	0.0666514	0.0377727	0.796533	1	0.783084	1	NONE
FBgn0002856	Acp26Ab	2L:5892298-5892862	-	Known	YES	0.000361954	0.710167	0.97657	0.302197	0.845307	0.00827545	0.022384	0.100007	0.0422511	0.0957194	1	1	NONE
FBgn0002862	Mst87F	3R:9652873-9653730	-	Known	YES	0.00295095	0.288319	0.663724	0.364112	0.871235	0.216655	0.328252	2.96809e-14	0.999999	1	0.999999	1	NONE
FBgn0002863	Acp95EF	3R:20054697-20055001	+	Known	YES	0.00168617	0.422331	0.787062	0.465636	0.904715	0.0753019	0.143049	0.0872357	1	1	0.227593	0.923981	NONE
FBgn0002865	Mst98Ca	3R:24117060-24118378	+	Known	YES	2.74121e-05	0.918547	1	0.813213	0.975092	0.151357	0.248573	0.0351471	1	1	0.627473	1	NONE
FBgn0002868	MtnA	3R:5609129-5610092	-	Known	YES	0.213893	9.51684e-22	3.35864e-19	0.0168281	0.643733	9.02129e-06	4.00261e-05	0.555088	4.86808e-08	3.63017e-07	0.00273802	0.0779501	BOTH
FBgn0002869	MtnB	3R:16328824-16329468	-	Known	YES	0.00449433	0.189892	0.541601	0.69498	0.955954	0.761765	0.830341	0.744214	3.21835e-22	1.18834e-20	0.0481491	0.438089	BOTH
FBgn0002872	mu2	3L:1942734-1947475	-	Known	YES	0.00611621	0.126049	0.43273	0.989387	0.997951	0	0	0.55301	6.72875e-14	1.01254e-12	0.424176	1	BOTH
FBgn0002873	mud	X:14141765-14152628	+	Known	YES	0.0050165	0.166009	0.50491	0.260678	0.827357	0	0	0.363368	0.000196223	0.000785805	0.0851627	0.583816	BOTH
FBgn0002878	mus101	X:13616279-13621146	+	Known	YES	8.05994e-05	0.860799	1	0.122615	0.738118	3.64153e-14	3.20677e-13	0.31189	0.000104781	0.000445811	0.357953	1	BASELINE
FBgn0002887	mus201	2L:8438169-8442342	+	Known	YES	0.000441175	0.681586	0.96031	0.194845	0.78873	0	0	0.310232	0.000277576	0.00107339	0.270026	0.993106	BASELINE
FBgn0002891	mus205	2R:3681130-3688549	+	Known	YES	0.0297953	0.000681236	0.00987272	0.375853	0.874494	0	0	0.364483	3.48839e-05	0.000163163	0.167722	0.806195	BOTH
FBgn0002899	mus301	3L:8130908-8135114	+	Known	YES	0.00332641	0.259552	0.6309	0.0556761	0.683125	0	0	0.304567	0.000950884	0.00323855	0.192679	0.857468	BASELINE
FBgn0002901	mus304	3L:18102914-18105947	+	Known	YES	9.11367e-07	0.985123	1	0.18895	0.78554	0	0	0.373371	0.00059599	0.00213458	0.0357767	0.374138	BASELINE
FBgn0002905	mus308	3R:8531245-8538021	-	Known	YES	0.0110472	0.0395292	0.211912	0.421901	0.889858	4.04121e-14	3.5392e-13	0.612459	1.33455e-13	1.94031e-12	0.052096	0.45398	BOTH
FBgn0002906	Blm	3R:7562532-7567505	-	Known	YES	0.00439239	0.195005	0.549316	0.0647053	0.686923	0	0	0.33959	0.00145303	0.00475786	0.0638596	0.504457	BASELINE
FBgn0002914	Myb	X:15748865-15751856	-	Known	YES	0.0328316	0.000358772	0.00582779	0.133719	0.748958	0	0	0.212854	0.00617329	0.0173941	0.535569	1	BASELINE
FBgn0002917	na	X:14160400-14171449	+	Known	YES	0.00576709	0.137429	0.45462	0.161962	0.767515	0	0	0.388326	0.00184011	0.00586663	0.0103108	0.186055	BOTH
FBgn0002921	Atpalpha	3R:16774436-16801961	+	Known	YES	0.00651748	0.11424	0.40929	0.168359	0.770084	1.40164e-05	6.11287e-05	0.17318	0.0902823	0.184731	0.362761	1	BASELINE
FBgn0002922	nau	3R:19538536-19544079	-	Known	YES	0.000329358	0.722963	0.982641	0.284376	0.837681	0.698328	0.781344	0.0246574	0.769371	1	0.915924	1	BASELINE
FBgn0002924	ncd	3R:25630012-25632849	-	Known	YES	0.0139075	0.0208063	0.137833	0.00729485	0.640933	3.71395e-11	2.5157e-10	0.291572	0.000430988	0.00159288	0.335817	1	BASELINE
FBgn0002926	ndl	3L:6587038-6596466	-	Known	YES	0.000265391	0.750323	0.996122	0.732921	0.963316	0.0041391	0.0121583	0.4336	0.0220054	0.0540535	0.000115267	0.00733309	BASELINE
FBgn0002930	nec	2R:3043982-3045746	-	Known	YES	0.00856461	0.0700659	0.305078	0.489538	0.912331	0.45153	0.570902	0.37621	1.12798e-06	6.83371e-06	0.377447	1	BOTH
FBgn0002931	net	2L:82421-87387	-	Known	YES	0.000115503	0.833729	1	0.849518	0.981843	0.202826	0.312104	0.56105	4.49687e-09	3.80052e-08	0.00722744	0.148041	BOTH
FBgn0002932	neur	3R:4846070-4865193	-	Known	YES	0.00045063	0.678381	0.958291	0.24467	0.817533	0	0	0.402573	0.000319808	0.00121857	0.0181398	0.256363	BOTH
FBgn0002936	ninaA	2L:877302-878270	+	Known	YES	0.0587665	1.53365e-06	5.07087e-05	0.258725	0.826042	2.78244e-12	2.06502e-11	0.455791	4.48124e-07	2.88928e-06	0.0676631	0.519593	BOTH
FBgn0002937	ninaB	3R:9526287-9528886	+	Known	YES	0.010796	0.0418542	0.220072	0.619583	0.944431	2.90949e-07	1.48469e-06	0.47615	4.95777e-11	5.3619e-10	0.545238	1	BOTH
FBgn0002938	ninaC	2L:7377702-7384344	+	Known	YES	0.00368379	0.235395	0.602036	0.120067	0.735913	1.0656e-06	5.17677e-06	0.428804	0.0007695	0.00268181	0.00336899	0.0893225	BOTH
FBgn0002939	ninaD	2L:18081628-18083608	+	Known	YES	0.030886	0.000540973	0.00819945	0.286908	0.839459	0.154206	0.252116	0.882201	1.17425e-25	6.1132e-24	3.22639e-09	8.32087e-07	BOTH
FBgn0002940	ninaE	3R:15711977-15713928	-	Known	YES	0.00806643	0.0787832	0.328242	0.181788	0.779905	9.92539e-14	8.36879e-13	0.387563	3.18631e-05	0.000150102	0.0944181	0.616494	BOTH
FBgn0002941	slou	3R:17374383-17382904	-	Known	YES	6.97887e-05	0.870382	1	0.0202609	0.652552	0.57992	0.68545	0.00705115	0.999999	1	0.922471	1	NONE
FBgn0002945	nkd	3L:18996841-19038549	-	Known	YES	0.0097237	0.0535153	0.257937	0.281773	0.836697	0	0	0.195019	0.01215	0.0318643	0.56096	1	BASELINE
FBgn0002948	nod	X:11474805-11479783	+	Known	YES	0.000740219	0.595068	0.909378	0.0823533	0.702796	8.88178e-16	9.16226e-15	0.381393	3.21923e-06	1.81489e-05	0.252018	0.964096	BOTH
FBgn0002962	nos	3R:14982960-14985924	+	Known	YES	0.00350081	0.247404	0.616865	0.0936038	0.713763	1.11022e-16	1.26222e-15	0.364612	3.69901e-05	0.000172054	0.163614	0.798034	BOTH
FBgn0002973	numb	2L:9437469-9464184	+	Known	YES	0.00418984	0.20565	0.563783	0.552003	0.931111	3.26517e-13	2.61932e-12	0.384228	4.75456e-06	2.5983e-05	0.208728	0.889092	BOTH
FBgn0002985	odd	2L:3604224-3606756	-	Known	YES	0.00420819	0.204659	0.561974	0.61687	0.944352	2.44672e-11	1.67801e-10	0.36036	1.44408e-05	7.26092e-05	0.249789	0.961172	BOTH
FBgn0002989	okr	2L:2989594-2992759	-	Known	YES	0.00969632	0.0538545	0.258976	0.338257	0.861381	0	0	0.206516	0.00265084	0.00813053	0.735067	1	BASELINE
FBgn0003002	opa	3R:678535-695701	+	Known	YES	0.00164991	0.42737	0.791956	0.766361	0.968455	0.000233664	0.000876887	0.150435	0.185105	0.339016	0.370953	1	BASELINE
FBgn0003008	or	2R:19855462-19856466	+	Known	YES	3.78834e-05	0.904309	1	0.0444674	0.673536	0	0	0.168468	0.0477439	0.106473	0.513522	1	BASELINE
FBgn0003009	ord	2R:19158780-19163059	-	Known	YES	0.0298153	0.000678364	0.00984995	0.0825822	0.702796	0.00109994	0.00366821	0.292619	1.14352e-06	6.92038e-06	0.999999	1	BASELINE
FBgn0003011	ort	3R:15485470-15489394	+	Known	YES	0.00103358	0.529935	0.869276	0.60859	0.942933	0.629224	0.726783	0.22205	1	1	0.00805226	0.158541	BASELINE
FBgn0003015	osk	3R:4760848-4764117	+	Known	YES	0.00319409	0.269263	0.643335	0.125231	0.740514	0	0	0.462372	6.01141e-09	4.98502e-08	0.239695	0.946019	BOTH
FBgn0003016	osp	2L:14599196-14689340	-	Known	YES	0.000869399	0.564589	0.891489	0.956898	0.994241	0.000179801	0.000685811	0.322488	4.63859e-06	2.54114e-05	0.656963	1	BOTH
FBgn0003023	otu	X:8379041-8383568	-	Known	YES	0.000239473	0.762443	1	0.204585	0.795967	2.88658e-15	2.8206e-14	0.305922	0.0901039	0.184393	0.0108864	0.191821	BASELINE
FBgn0003028	ovo	X:4942306-4964962	+	Known	YES	2.5742e-06	0.975	1	0.0189368	0.645654	0	0	0.365177	0.00136033	0.00448279	0.0293991	0.334352	BOTH
FBgn0003034	SP	3L:13294735-13295022	+	Known	YES	0.00143115	0.459803	0.818727	0.439772	0.895345	0.0292138	0.0657354	0.102531	1	1	0.215658	0.901894	NONE
FBgn0003041	pbl	3L:7889209-7905054	-	Known	YES	0.00355289	0.243911	0.612779	0.106668	0.722409	0	0	0.430836	6.34216e-05	0.000281821	0.0155806	0.235301	BOTH
FBgn0003042	Pc	3L:21299238-21311120	-	Known	YES	0.000915698	0.554397	0.88474	0.0217283	0.655419	0	0	0.29832	0.00289847	0.00881344	0.13764	0.734738	BASELINE
FBgn0003044	Pcl	2R:14022931-14027495	+	Known	YES	0.00376485	0.230301	0.595594	0.169867	0.77085	1.33227e-15	1.35228e-14	0.364031	0.00229525	0.0071564	0.0221938	0.288348	BOTH
FBgn0003046	Pcp	2L:7021682-7022470	+	Known	YES	0.00699717	0.101692	0.381922	0.731514	0.962833	0.148264	0.244583	0.699301	2.62945e-25	1.32369e-23	1	1	BOTH
FBgn0003048	pcx	X:2119329-2132078	+	Known	YES	0.00754759	0.0891126	0.352715	0.703669	0.958172	0.000494852	0.00176066	0.145444	0.00539919	0.0154006	1	1	NONE
FBgn0003053	peb	X:4511597-4521239	+	Known	YES	0.000991451	0.538447	0.873748	0.431738	0.892177	0.00201258	0.00634617	0.365396	6.84919e-05	0.000302228	0.126409	0.709072	BOTH
FBgn0003057	CG10598	X:17119190-17120900	-	Known	YES	0.00150096	0.44905	0.810514	0.413337	0.885862	0.983144	0.989216	0.494969	8.31629e-05	0.000361353	0.000589865	0.0267209	BOTH
FBgn0003060	CG9757	3R:9437305-9438155	-	Known	YES	0.00134697	0.473319	0.828523	0.20256	0.794779	0.158715	0.257803	0.402674	0.00470637	0.0136191	0.00273157	0.0779501	BOTH
FBgn0003062	Fib	2R:18960432-18962248	-	Known	YES	0.0109922	0.0400266	0.213748	0.518223	0.921388	0.498743	0.614288	0.309579	3.91882e-08	2.9525e-07	0.999999	1	ETOH
FBgn0003065	CG2150	3R:27589026-27590494	-	Known	YES	0.00132346	0.477209	0.831765	0.860344	0.983367	0.20296	0.312253	0.22189	0.11165	0.221208	0.117312	0.683546	BASELINE
FBgn0003068	per	X:2579613-2586813	+	Known	YES	0.00762211	0.0875433	0.348914	0.0725455	0.696501	3.33067e-15	3.22912e-14	0.315926	0.0051362	0.0147218	0.0640966	0.504808	BOTH
FBgn0003071	Pfk	2R:5997245-6004962	+	Known	YES	0.139034	4.11792e-14	6.24713e-12	0.656363	0.951005	0.000323425	0.00118819	0.346829	8.77702e-08	6.3e-07	0.961122	1	BASELINE
FBgn0003074	Pgi	2R:4798405-4801574	-	Known	YES	0.012557	0.0281176	0.168731	0.117111	0.732702	0	0	0.392543	6.44685e-10	6.0937e-09	1	1	BOTH
FBgn0003076	Pgm	3L:16119118-16121631	-	Known	YES	0.00473617	0.178371	0.525044	0.644907	0.9482	0	0	0.673588	8.87541e-21	2.7758e-19	0.433083	1	BOTH
FBgn0003079	Raf	X:2189499-2237903	+	Known	YES	4.37279e-06	0.96742	1	0.298371	0.844234	0	0	0.420426	1.58563e-05	7.90037e-05	0.0465608	0.431928	BASELINE
FBgn0003082	phr	2R:3712794-3714824	+	Known	YES	0.00541139	0.150216	0.478723	0.139263	0.750405	1.00995e-09	6.19274e-09	0.763974	9.01797e-25	4.30692e-23	0.0871837	0.590745	BOTH
FBgn0003086	Pig1	X:3142633-3143322	-	Known	RARE	0.00441656	0.193779	0.547765	0.531265	0.925593	0.617506	0.717029	0.143432	0.46765	0.713943	0.22836	0.925281	NONE
FBgn0003087	pim	2L:10362989-10364092	+	Known	YES	0.0172789	0.00991808	0.081441	0.0319942	0.664932	0	0	0.422627	1.93408e-06	1.13284e-05	0.105541	0.650576	BOTH
FBgn0003089	pip	3L:19291723-19330709	-	Known	YES	0.00162118	0.431425	0.795271	0.782623	0.970529	0.163655	0.264034	0.327773	0.000893117	0.00305827	0.112627	0.670142	BASELINE
FBgn0003090	pk	2R:3038208-3110883	+	Known	YES	0.0390059	9.77937e-05	0.00195395	0.618176	0.944352	0	0	0.285432	0.000126238	0.00052707	0.531673	1	BASELINE
FBgn0003091	Pkc53E	2R:12812160-12832631	+	Known	YES	0.0282028	0.000954384	0.013023	0.254822	0.823987	0.101001	0.180773	0.372814	0.0464469	0.103912	0.00127683	0.0465307	BOTH
FBgn0003093	Pkc98E	3R:24864878-24874870	+	Known	YES	0.00645652	0.115953	0.413061	0.231088	0.813008	0.0193492	0.0463916	0.267429	0.0151368	0.0387309	0.128574	0.714477	BOTH
FBgn0003114	plu	2R:16150463-16151189	-	Known	YES	0.0169612	0.0106295	0.0855439	0.291532	0.841553	7.83817e-14	6.66931e-13	0.500411	6.33595e-06	3.38688e-05	0.00268992	0.0773606	BOTH
FBgn0003116	pn	X:2075244-2076949	+	Known	YES	0.000100662	0.844633	1	0.210293	0.799785	2.88658e-15	2.8206e-14	0.163556	0.0159998	0.0406784	0.775581	1	BASELINE
FBgn0003117	pnr	3R:11851801-11867518	+	Known	YES	0.000186775	0.789509	1	0.29776	0.844023	1.10188e-10	7.19755e-10	0.282902	0.000408078	0.00151715	0.399638	1	BASELINE
FBgn0003118	pnt	3R:19115953-19171889	-	Known	YES	0.0107123	0.0426608	0.222787	0.205002	0.796066	0.000730143	0.00251919	0.260541	0.0075549	0.0207941	0.211199	0.893154	BASELINE
FBgn0003124	polo	3L:20302754-20306566	+	Known	YES	0.00976945	0.0529537	0.256298	0.0627054	0.685568	0	0	0.386054	0.000221002	0.000873456	0.0399784	0.398589	BOTH
FBgn0003129	Poxm	3R:4144747-4159514	-	Known	YES	0.0006464	0.619421	0.924266	0.0725765	0.696501	0	0	0.172017	0.00300333	0.00910503	1	1	BASELINE
FBgn0003130	Poxn	2R:11714198-11722560	-	Known	RARE	0.00461107	0.184227	0.533705	0.521337	0.922601	0.364414	0.48521	0.105949	0.025871	0.0623563	1	1	NONE
FBgn0003132	Pp1-13C	X:15253134-15255094	-	Known	YES	1.78671e-05	0.9342	1	0.0287154	0.660983	0.291266	0.41094	0	1	1	1	1	NONE
FBgn0003134	Pp1alpha-96A	3R:20343992-20348053	+	Known	YES	0.010202	0.0479404	0.239785	0.743085	0.964886	5.53675e-05	0.000225097	0.334103	5.96996e-06	3.20607e-05	0.522378	1	BASELINE
FBgn0003137	Ppn	3R:24346387-24366046	-	Known	YES	0.00186146	0.399175	0.76823	0.193434	0.788383	0	0	0.487638	2.21013e-10	2.21323e-09	0.311493	1	BOTH
FBgn0003138	Ptp61F	3L:1342493-1475257	-	Known	YES	0.000514384	0.657734	0.946028	0.190336	0.786593	0	0	0.448003	1.32461e-05	6.7004e-05	0.0186966	0.261001	BOTH
FBgn0003139	PpV	X:6265098-6266948	-	Known	YES	0.00976276	0.0530354	0.256435	0.0795362	0.700819	0	0	0.288425	0.000458077	0.00168177	0.349092	1	BASELINE
FBgn0003140	PpY-55A	2R:13842901-13844075	-	Known	YES	0.00422827	0.20358	0.560825	0.263868	0.828972	0.178852	0.283062	0.0297549	0.614202	0.878663	0.971566	1	NONE
FBgn0003141	pr	2L:20073719-20075458	-	Known	YES	1.63598e-05	0.937031	1	0.0056945	0.616443	0	0	0.305283	0.00015688	0.000641427	0.357911	1	BASELINE
FBgn0003145	prd	2L:12082995-12085827	-	Known	YES	0.00491158	0.170518	0.512639	0.551756	0.931111	0.663395	0.753299	0.186392	0.473789	0.721292	0.0851304	0.583816	NONE
FBgn0003149	Prm	3L:8725958-8738410	-	Known	YES	0.00136447	0.470457	0.826592	0.584167	0.938446	2.96547e-11	2.02384e-10	0.410481	1.48202e-11	1.70455e-10	0.999999	1	BASELINE
FBgn0003159	CG2841	X:2238982-2260389	-	Known	YES	0.00129996	0.481148	0.83362	0.944726	0.992605	0.00108011	0.00360819	0.387021	0.00783333	0.0214899	0.00361536	0.0928829	BASELINE
FBgn0003162	Pu	2R:17062820-17070113	+	Known	YES	0.0168911	0.0107933	0.0864901	0.636153	0.946814	0.017652	0.0428776	0.657691	6.24613e-13	8.38662e-12	0.00215757	0.0669775	BOTH
FBgn0003165	pum	3R:4892065-5063404	-	Known	YES	0.00590997	0.132639	0.445541	0.515951	0.921048	0.0535662	0.108518	0.32179	4.39825e-05	0.000201807	0.384759	1	BOTH
FBgn0003169	put	3R:10444752-10451425	-	Known	YES	1.23712e-05	0.945229	1	0.177587	0.778259	0	0	0.291055	2.39578e-05	0.000115899	0.717064	1	BASELINE
FBgn0003174	pwn	2R:3170077-3188311	+	Known	YES	0.01475	0.0172668	0.12144	0.622208	0.944438	0.114003	0.199027	0.404493	3.9631e-05	0.000183473	0.0511983	0.451063	BOTH
FBgn0003175	px	2R:18381802-18449570	-	Known	YES	0.00724539	0.0957955	0.36853	0.416781	0.887212	1.59428e-13	1.31643e-12	0.352055	1.44105e-08	1.14407e-07	1	1	BOTH
FBgn0003178	PyK	3R:18193258-18198468	+	Known	YES	0.000419137	0.689217	0.965003	0.544915	0.929804	4.26597e-05	0.000176016	0.21422	4.46843e-05	0.000204803	0.999999	1	BASELINE
FBgn0003187	qua	2L:17486806-17497208	-	Known	YES	0.00267158	0.312384	0.689061	0.151005	0.759899	0	0	0.33605	3.2444e-05	0.000152602	0.321255	1	BASELINE
FBgn0003189	r	X:16549392-16562745	+	Known	YES	0.0549566	3.42173e-06	0.000103819	0.112308	0.727464	3.41534e-06	1.57822e-05	0.590324	8.70975e-16	1.63318e-14	0.423928	1	BOTH
FBgn0003204	ras	X:10638535-10643130	+	Known	YES	0.0111352	0.0387476	0.20943	0.58307	0.938062	3.5083e-14	3.09595e-13	0.367142	4.91721e-09	4.12664e-08	0.999999	1	BOTH
FBgn0003205	Ras85D	3R:5336283-5338789	-	Known	YES	0.00150265	0.448795	0.810229	0.0413819	0.672871	0	0	0.222553	0.000815276	0.00282198	0.795354	1	BASELINE
FBgn0003206	Ras64B	3L:4139076-4141398	+	Known	YES	0.00302895	0.282026	0.657853	0.138238	0.750086	0	0	0.0480752	0.266363	0.456843	1	1	NONE
FBgn0003209	raw	2L:8709880-8740660	-	Known	YES	0.000363536	0.709563	0.976101	0.027947	0.660983	0.0343669	0.075215	0.46267	2.00456e-13	2.8538e-12	1	1	BOTH
FBgn0003210	rb	X:4429668-4434659	-	Known	YES	0.00663549	0.111003	0.403208	0.340456	0.862683	0	0	0.324646	1.37269e-07	9.56205e-07	0.999999	1	BASELINE
FBgn0003218	rdgB	X:13656785-13673521	+	Known	YES	0.00218437	0.361047	0.736347	0.524361	0.923028	2.57374e-10	1.64027e-09	0.665024	8.04289e-22	2.8177e-20	0.777551	1	BOTH
FBgn0003227	rec	3R:11648741-11658354	-	Known	YES	0.0222931	0.00335963	0.035972	0.895861	0.987134	6.06626e-13	4.73601e-12	0.645974	4.26325e-17	9.10407e-16	0.160288	0.78984	BOTH
FBgn0003231	ref(2)P	2L:19542468-19545548	+	Known	YES	0.0900496	1.97243e-09	1.26929e-07	0.553023	0.931155	3.33067e-16	3.60914e-15	0.750161	4.18583e-24	1.84656e-22	0.123093	0.699957	BOTH
FBgn0003248	Rh2	3R:14725145-14726741	+	Known	YES	0.00127958	0.484609	0.83625	0.990665	0.998328	2.20063e-05	9.39452e-05	0.760638	1.67067e-23	6.97541e-22	0.0441407	0.420427	BOTH
FBgn0003249	Rh3	3R:15906782-15908172	-	Known	YES	0.0050437	0.164863	0.502946	0.28537	0.837832	1.11022e-15	1.13688e-14	0.545991	2.38354e-11	2.67089e-10	0.114503	0.674918	BOTH
FBgn0003250	Rh4	3L:16845627-16855617	-	Known	YES	0.00476895	0.176872	0.523059	0.21373	0.803082	0	0	0.833254	7.43005e-27	4.3323e-25	0.000888776	0.0361188	BOTH
FBgn0003254	rib	2R:15157583-15168901	+	Known	YES	0.000165635	0.801515	1	0.8822	0.985514	0.000887989	0.00301752	0.339884	0.000664201	0.00234951	0.0934425	0.612838	BOTH
FBgn0003255	rk	2L:13982743-14001248	-	Known	YES	0.00420501	0.20483	0.562164	0.594119	0.940567	0.00755565	0.0206554	0.401463	6.65665e-07	4.17388e-06	0.259039	0.974505	BOTH
FBgn0003256	rl	2RHet:198176-252641	+	Known	YES	-1.11022e-16	1	1	0.366293	0.871369	0	0	0.0808809	0.074577	0.156772	1	1	NONE
FBgn0003257	r-l	3R:16896279-16899041	-	Known	YES	0.00613074	0.125598	0.432118	0.825579	0.978118	0	0	0.574637	1.96838e-15	3.53475e-14	0.518451	1	BOTH
FBgn0003261	Rm62	3R:1826148-1834301	-	Known	YES	0.00586477	0.134134	0.44841	0.878419	0.98537	0.282118	0.401039	0.456964	5.97251e-12	7.18996e-11	0.998633	1	BOTH
FBgn0003267	ro	3R:22702493-22706893	-	Known	YES	0.000167003	0.800715	1	0.366228	0.871369	0.027148	0.0617063	0.100348	0.0405055	0.0923076	1	1	NONE
FBgn0003268	rod	3R:27406673-27413966	+	Known	YES	0.0078029	0.0838585	0.340876	0.0601609	0.685423	0	0	0.347653	0.000939537	0.00320413	0.0630996	0.501008	BASELINE
FBgn0003270	amos	2L:18596136-18596921	-	Known	RARE	0.00137861	0.468166	0.825073	0.0462257	0.677578	0.18516	0.291011	0.0362302	0.758454	1	0.81964	1	NONE
FBgn0003274	RpLP2	2R:12473634-12474237	+	Known	YES	0.0122401	0.0301902	0.177048	0.747208	0.965623	0.0924557	0.16841	0.227773	0.0327696	0.076819	0.211386	0.893486	ETOH
FBgn0003275	RpII18	3R:1197517-1198119	+	Known	YES	0.00229949	0.348677	0.724772	0.144689	0.754772	0.00165468	0.00532791	0.170952	0.00101445	0.00344	1	1	ETOH
FBgn0003277	RpII215	X:11456833-11464359	-	Known	YES	0.00421456	0.204315	0.56162	0.888674	0.985863	1.04164e-09	6.37539e-09	0.288543	0.00389075	0.011495	0.151895	0.769739	BASELINE
FBgn0003278	RpI135	2L:404285-407969	+	Known	YES	0.000797626	0.581127	0.901344	0.12263	0.738118	0	0	0.574054	5.67179e-15	9.57976e-14	0.430047	1	BOTH
FBgn0003279	RpL4	3R:23748543-23750610	+	Known	YES	0.0226012	0.00314514	0.0341584	0.867733	0.983822	0.245859	0.361254	0.195814	0.000101554	0.000433458	1	1	NONE
FBgn0003285	rst	X:2844432-2867867	-	Known	YES	0.0132596	0.024031	0.151931	0.0227079	0.655419	0.00284314	0.0086628	0.932897	1.43937e-35	1.85607e-33	1.95107e-10	6.67485e-08	BOTH
FBgn0003292	rt	3L:11577222-11580870	-	Known	YES	0.00527673	0.155402	0.487935	0.00289768	0.591391	1.11022e-16	1.26222e-15	0.502247	4.41295e-10	4.26132e-09	0.178294	0.83	BOTH
FBgn0003295	ru	3L:1370628-1387437	+	Known	YES	0.000172568	0.797492	1	0.350977	0.866472	0.682874	0.769344	0.198513	0.0903527	0.184835	0.22554	0.921004	NONE
FBgn0003300	run	X:20561697-20568348	+	Known	YES	0.00612289	0.125842	0.432356	0.101887	0.719673	0.491994	0.608318	0.176408	1	1	0.0384455	0.389885	NONE
FBgn0003301	rut	X:14681511-14720106	-	Known	YES	0.0327563	0.00036452	0.00590314	0.848158	0.981394	1.0445e-12	7.99621e-12	0.653386	4.93182e-17	1.0485e-15	0.115646	0.679028	BOTH
FBgn0003302	rux	X:5929786-5931833	-	Known	YES	0.000687639	0.608459	0.916998	0.0281349	0.660983	1.77636e-15	1.77774e-14	0.239167	0.00759379	0.0208875	0.322487	1	BASELINE
FBgn0003308	ry	3R:8858250-8863742	+	Known	YES	0.00389298	0.222516	0.586455	0.263676	0.828843	7.61613e-14	6.48862e-13	0.416611	2.44344e-09	2.13004e-08	0.705051	1	BOTH
FBgn0003310	S	2L:1049674-1077815	-	Known	YES	0.00691811	0.103652	0.386513	0.122021	0.737701	1.19904e-14	1.10617e-13	0.488802	1.8157e-05	8.95877e-05	0.00246264	0.0729371	BOTH
FBgn0003312	sad	3R:7702957-7705476	+	Known	YES	0.00193123	0.390471	0.761813	0.727413	0.962316	0.46665	0.584989	0.336296	7.70187e-06	4.05115e-05	0.473969	1	BOTH
FBgn0003317	sax	2R:3693989-3697572	+	Known	YES	4.86104e-05	0.891678	1	0.0321194	0.664932	0	0	0.347128	0.00223824	0.00699753	0.0398668	0.398276	BASELINE
FBgn0003321	sbr	X:10726785-10741125	-	Known	YES	0.00069836	0.605677	0.915047	0.252197	0.823558	0	0	0.31466	0.000222149	0.00087737	0.266199	0.986572	BASELINE
FBgn0003326	sca	2R:8668046-8689515	+	Known	YES	0.0247925	0.00196968	0.0234925	0.702976	0.958147	1.15761e-10	7.55273e-10	0.507374	0.000316921	0.00120881	8.79461e-05	0.00584235	BOTH
FBgn0003328	scb	2R:11136289-11146003	+	Known	YES	0.0056116	0.142862	0.465203	0.120167	0.735913	0.363757	0.484566	0.636186	2.3645e-12	2.98249e-11	0.00451854	0.107671	BOTH
FBgn0003330	Sce	3R:23506153-23507751	-	Known	YES	0.0456805	2.40557e-05	0.000586206	0.0167197	0.643733	6.37108e-06	2.86821e-05	0.255862	1.03984e-05	5.34541e-05	1	1	BASELINE
FBgn0003334	Scm	3R:5459081-5463333	-	Known	YES	0.000154034	0.808453	1	0.196555	0.78961	0	0	0.314287	0.040494	0.0922876	0.0164514	0.24266	BASELINE
FBgn0003339	Scr	3R:2648842-2675703	-	Known	YES	0.00274377	0.305924	0.683146	0.318126	0.85312	4.44089e-16	4.71912e-15	0.278283	0.404526	0.637517	0.00541626	0.122448	BOTH
FBgn0003345	sd	X:15698403-15721714	+	Known	YES	0.0170895	0.0103363	0.0838281	0.0532124	0.679814	0.00838168	0.0226184	0.267266	0.0180598	0.0453009	0.117283	0.683497	BASELINE
FBgn0003346	RanGAP	2L:19441959-19447317	+	Known	YES	0.000842277	0.570729	0.895073	0.107309	0.722943	1.36668e-13	1.13493e-12	0.373626	2.24714e-06	1.30255e-05	0.3298	1	BOTH
FBgn0003353	sei	2R:19934934-19940558	+	Known	YES	0.00628141	0.121032	0.423196	0.710315	0.959332	1.56319e-13	1.29172e-12	0.619396	4.42494e-19	1.15335e-17	0.79726	1	BOTH
FBgn0003356	Jon99Cii	3R:25749476-25750337	-	Known	YES	0.0638	5.3011e-07	1.96604e-05	0.032743	0.664932	0.0780431	0.147073	0.771958	2.66116e-25	1.33764e-23	0.076315	0.552359	BOTH
FBgn0003357	Jon99Ciii	3R:25747938-25749177	+	Known	YES	0.0237292	0.00247114	0.0282379	0.0630928	0.686119	2.70894e-14	2.41792e-13	0.713238	8.03683e-16	1.51122e-14	0.000974444	0.0384929	BOTH
FBgn0003358	Jon99Ci	3R:25750948-25751911	-	Known	YES	0.0025149	0.327025	0.703371	0.0172639	0.643733	0	0	0.927279	6.52885e-36	8.65189e-34	8.12797e-09	1.89241e-06	BOTH
FBgn0003360	sesB	X:10674926-10680991	-	Known	YES	0.000256507	0.754401	0.998441	0.826986	0.978305	1.22661e-07	6.45995e-07	0.344518	1.02187e-07	7.25852e-07	0.964033	1	BOTH
FBgn0003366	sev	X:10965474-10980332	-	Known	YES	0.000237041	0.763616	1	0.731572	0.962833	0	0	0.524221	3.71068e-11	4.06961e-10	0.195217	0.862854	BOTH
FBgn0003371	sgg	X:2527985-2573586	+	Known	YES	0.00865705	0.0685648	0.301399	0.906968	0.989224	0.00447086	0.0130285	0.360991	0.00275183	0.00840183	0.0220121	0.287048	BOTH
FBgn0003374	Sgs4	X:3143534-3145073	+	Known	RARE	0.0041286	0.209003	0.568659	0.993146	0.99881	0.764318	0.83209	0.0500561	1	1	0.503364	1	NONE
FBgn0003375	Sgs5	3R:13421084-13421834	+	Known	RARE	0.0281207	0.000971125	0.0132085	0.847173	0.981157	0.830708	0.882111	0.189848	0.000245623	0.000959792	1	1	NONE
FBgn0003377	Sgs7	3L:11502961-11503347	+	Known	RARE	0.0195235	0.00609536	0.0570245	0.939271	0.992025	0.209691	0.320095	0.186416	0.000747032	0.00261084	1	1	NONE
FBgn0003378	Sgs8	3L:11502067-11502494	-	Known	RARE	0.000331268	0.722194	0.982421	0.25502	0.824021	0.365319	0.486114	0.0130776	0.757597	1	1	1	NONE
FBgn0003380	Sh	X:17818340-17957278	-	Known	YES	0.0055941	0.143488	0.466622	0.308147	0.847953	5.57332e-14	4.80688e-13	0.590131	6.4476e-11	6.86686e-10	0.0125449	0.207247	BOTH
FBgn0003382	sha	2R:7211819-7223968	+	Known	RARE	0.00335434	0.257559	0.628853	0.302626	0.845307	0.937749	0.95784	0.163869	0.131638	0.254875	0.35298	1	BASELINE
FBgn0003386	Shaw	2L:3718185-3729145	+	Known	YES	0.00237787	0.340582	0.716561	0.130231	0.744469	1.31268e-11	9.19454e-11	0.361321	0.143329	0.274139	0.000573055	0.026069	BOTH
FBgn0003388	shd	3L:14607558-14615305	+	Known	YES	0.0164662	0.0118433	0.0925137	0.146558	0.755434	1.50031e-08	8.43984e-08	0.513121	6.52271e-08	4.76858e-07	0.0183866	0.258685	BOTH
FBgn0003390	shf	X:6665496-6673692	-	Known	YES	0.00412826	0.209021	0.568659	0.102969	0.720962	0.673475	0.761371	0.49612	4.98957e-06	2.71699e-05	0.00388166	0.096975	BOTH
FBgn0003391	shg	2R:16937159-16944702	-	Known	YES	0.00615619	0.124814	0.430768	0.612385	0.943126	5.35127e-14	4.6237e-13	0.386984	0.00183788	0.00586009	0.010883	0.191821	BASELINE
FBgn0003392	shi	X:15786149-15800749	+	Known	YES	0.035168	0.000219274	0.00386316	0.730775	0.962833	4.64712e-11	3.11942e-10	0.387026	0.000316618	0.00120779	0.0319232	0.35034	BOTH
FBgn0003396	shn	2R:7046591-7104899	+	Known	YES	0.00418954	0.205667	0.563783	0.151576	0.759899	5.80146e-07	2.88147e-06	0.332928	4.90974e-08	3.6596e-07	1	1	BASELINE
FBgn0003401	shu	2R:19728984-19730809	-	Known	YES	0.00181685	0.404889	0.772578	0.39021	0.880729	0	0	0.395586	7.17851e-10	6.73779e-09	0.999999	1	BOTH
FBgn0003410	sina	3L:16846851-16851812	+	Known	YES	0.000359711	0.711026	0.97679	0.104895	0.722409	0	0	0.416165	0.000546274	0.00197147	0.00751383	0.152032	BOTH
FBgn0003411	sisA	X:11215612-11216390	-	Known	YES	0.048794	1.25054e-05	0.000332754	0.440883	0.895391	0.253203	0.369421	0.0996645	0.795736	1	0.324966	1	NONE
FBgn0003415	skd	3L:20985914-21020534	-	Known	YES	0.00661382	0.11159	0.404288	0.368788	0.872693	0.000137954	0.000534652	0.189186	0.000363896	0.00136775	1	1	NONE
FBgn0003416	sl	X:16244348-16250515	+	Known	YES	0.00309996	0.276448	0.652115	0.814075	0.975092	0	0	0.538308	1.14989e-10	1.18953e-09	0.0887637	0.595315	BOTH
FBgn0003423	slgA	X:21245029-21256186	+	Known	YES	0.0220389	0.00354778	0.0375187	0.606848	0.942617	0	0	0.573753	5.34375e-17	1.13177e-15	0.905701	1	BOTH
FBgn0003429	slo	3R:20488213-20537317	+	Known	YES	0.0053431	0.152821	0.483044	0.0573574	0.683125	2.22045e-16	2.42491e-15	0.47478	8.86163e-05	0.000382668	0.00170051	0.05794	BOTH
FBgn0003430	slp1	2L:3825675-3827099	+	Known	YES	0.00980546	0.0525161	0.25472	0.45368	0.90147	0.183285	0.28862	0.0285098	1	1	0.693881	1	BASELINE
FBgn0003435	sm	2R:15405369-15519013	-	Known	YES	0.00458719	0.185369	0.53535	0.0107483	0.640933	5.47748e-10	3.41296e-09	0.264814	0.0178135	0.0447368	0.125541	0.706041	BASELINE
FBgn0003444	smo	2L:277582-282167	+	Known	YES	0.000561145	0.643544	0.93854	0.0701369	0.691433	0	0	0.210567	0.00186826	0.00594797	0.760673	1	BASELINE
FBgn0003447	sn	X:7858057-7880634	+	Known	YES	3.07124e-05	0.913801	1	0.164797	0.768411	0	0	0.326799	6.40111e-05	0.000284213	0.312985	1	BASELINE
FBgn0003448	sna	2L:15476593-15478260	-	Known	RARE	0.00336275	0.256961	0.627926	0.672791	0.953166	0.399157	0.52026	0.157993	0.0439187	0.0990222	0.613136	1	NONE
FBgn0003449	snf	X:5203275-5204534	+	Known	YES	0.00102012	0.532628	0.870647	0.027191	0.660983	9.01969e-10	5.54992e-09	0.134496	0.0129984	0.0338458	1	1	NONE
FBgn0003450	snk	3R:8865887-8868492	-	Known	YES	0.000182459	0.791899	1	0.0472581	0.679301	8.12683e-13	6.26302e-12	0.32	0.00337345	0.0101065	0.0719337	0.535836	BASELINE
FBgn0003459	stwl	3L:14396030-14403039	-	Known	YES	3.02219e-05	0.91449	1	0.374936	0.874328	0	0	0.558005	1.13019e-13	1.65538e-12	0.33758	1	BOTH
FBgn0003460	so	2R:3306855-3322377	+	Known	YES	0.0233306	0.00269075	0.0301311	0.141623	0.752083	3.69704e-14	3.25394e-13	0.123697	0.23154	0.407519	0.503591	1	NONE
FBgn0003462	Sod1	3L:11105381-11106840	-	Known	YES	0.00768818	0.0861769	0.345604	0.35369	0.867428	0.0141146	0.0354224	0.198697	0.000173578	0.000703865	1	1	NONE
FBgn0003463	sog	X:15497316-15527467	-	Known	YES	0.0101061	0.0490078	0.243336	0.144972	0.755305	5.55112e-15	5.26908e-14	0.310328	9.64845e-06	4.98818e-05	0.668439	1	BASELINE
FBgn0003464	sol	X:21221307-21228939	+	Known	YES	9.3773e-06	0.952305	1	0.29469	0.843285	0.102862	0.183388	0.279803	2.41548e-07	1.62227e-06	1	1	BASELINE
FBgn0003475	spir	2L:20311219-20348386	+	Known	YES	0.00386571	0.224146	0.587839	0.0940766	0.713763	0.000247011	0.000924285	0.200061	0.00367415	0.0109108	0.733927	1	NONE
FBgn0003479	spn-A	3R:25880418-25881759	-	Known	YES	0.00228306	0.350407	0.726554	0.0394905	0.671288	0	0	0.24697	6.58316e-05	0.000291641	0.981181	1	BASELINE
FBgn0003480	spn-B	3R:10153773-10155330	+	Known	YES	0.000130972	0.823117	1	0.0205279	0.652552	0	0	0.248205	0.00688158	0.0191516	0.282568	1	BASELINE
FBgn0003482	spn-D	3R:22991438-22992844	+	Known	YES	0.0191132	0.00666058	0.0609136	0.0894216	0.711719	0	0	0.255418	0.000124236	0.000519878	0.799532	1	BASELINE
FBgn0003483	spn-E	3R:11663141-11670137	+	Known	YES	0.00315633	0.272117	0.646719	0.181689	0.779905	0	0	0.375729	3.34483e-05	0.000156872	0.128061	0.712792	BOTH
FBgn0003486	spo	3L:5583183-5585671	-	Known	YES	0.000574616	0.63959	0.936276	0.308533	0.847953	5.86737e-06	2.65171e-05	0.493613	1.07886e-07	7.63903e-07	0.0322556	0.352495	BOTH
FBgn0003495	spz	3R:22890712-22895792	-	Known	YES	0.000103944	0.842153	1	0.41185	0.885619	0	0	0.337278	0.00532937	0.0152183	0.0324159	0.353318	BASELINE
FBgn0003499	sr	3R:13916525-13961305	+	Known	YES	0.000659991	0.615762	0.922088	0.596989	0.941087	2.86305e-08	1.57722e-07	0.2364	0.126095	0.24559	0.0740493	0.543765	BASELINE
FBgn0003502	Btk29A	2L:8258373-8301079	-	Known	YES	0.0191615	0.00659136	0.0606279	0.290285	0.840935	0	0	0.3016	0.000138895	0.00057462	0.396726	1	BASELINE
FBgn0003507	srp	3R:11811874-11829803	+	Known	YES	0.000334701	0.720818	0.981621	0.0150728	0.640933	0.0767266	0.145163	0.246158	0.00476385	0.0137628	0.338501	1	ETOH
FBgn0003510	Sry-alpha	3R:25866939-25868793	+	Known	YES	0.10438	8.86689e-11	7.2331e-09	0.0315304	0.664932	0.249281	0.364859	0.339824	0.0282256	0.0673393	0.00863778	0.166532	BOTH
FBgn0003511	Sry-beta	3R:25865441-25866753	+	Known	YES	0.00149641	0.44974	0.811067	0.0481655	0.679301	1.54619e-07	8.07451e-07	0.219059	0.0209608	0.0517643	0.30932	1	BASELINE
FBgn0003512	Sry-delta	3R:25869063-25870608	+	Known	YES	0.00110934	0.515221	0.859046	0.0070865	0.640933	1.27379e-11	8.93521e-11	0.337777	0.00505761	0.0145214	0.0329616	0.356353	BOTH
FBgn0003513	ss	3R:12200156-12229412	-	Known	YES	4.04528e-05	0.901133	1	0.56034	0.93394	2.40615e-09	1.43164e-08	0.0570971	1	1	0.430228	1	BASELINE
FBgn0003514	sqh	X:6117094-6119173	-	Known	YES	0.0625057	6.96802e-07	2.50931e-05	0.173288	0.773171	0.697323	0.780649	0.162511	0.000453326	0.00166561	1	1	NONE
FBgn0003515	st	3L:16490751-16493560	+	Known	YES	0.00156755	0.439155	0.801544	0.435953	0.893337	0.0579116	0.115651	0.488798	1.03463e-08	8.36465e-08	0.0965725	0.623491	BOTH
FBgn0003517	sta	X:1375830-1377446	-	Known	YES	0.00132194	0.477463	0.831765	0.434943	0.893061	0.0127291	0.032384	0.148322	0.00181723	0.00580526	1	1	NONE
FBgn0003520	stau	2R:14005401-14013284	-	Known	YES	0.00190851	0.393274	0.76379	0.249548	0.821799	0.0026611	0.00816006	0.465592	1.55145e-09	1.39227e-08	0.317666	1	BOTH
FBgn0003525	stg	3R:25077548-25081522	-	Known	YES	0.00503835	0.165088	0.503345	0.166752	0.769325	0	0	0.344194	0.00324636	0.00976501	0.0351465	0.37067	BOTH
FBgn0003527	stil	2R:8457872-8459388	+	Known	YES	0.000833067	0.572843	0.896675	0.385849	0.878723	0	0	0.383137	2.13675e-06	1.2433e-05	0.274519	0.999978	BOTH
FBgn0003545	sub	2R:13633005-13635583	-	Known	YES	7.44718e-05	0.866144	1	0.016697	0.643733	0	0	0.323347	0.00031988	0.00121871	0.193096	0.85793	BOTH
FBgn0003557	Su(dx)	2L:2037714-2044372	+	Known	YES	0.00259384	0.319538	0.695839	0.797446	0.972901	0.312363	0.433416	0.246039	2.77365e-05	0.000132411	0.999999	1	BASELINE
FBgn0003559	su(f)	XHet:75589-80249	+	Known	YES	0	1	1	0.0930211	0.713763	0	0	0.47762	3.13732e-14	4.90144e-13	1	1	BOTH
FBgn0003567	su(Hw)	3R:10130177-10134311	-	Known	YES	0.00155082	0.441609	0.803878	0.551051	0.931015	0	0	0.386992	2.44957e-05	0.00011827	0.106905	0.654049	BASELINE
FBgn0003575	su(sable)	X:529923-537793	+	Known	YES	0.000931348	0.55103	0.88179	0.179486	0.779905	0	0	0.277433	4.80184e-06	2.62286e-05	1	1	BASELINE
FBgn0003598	Su(var)3-7	3R:9090086-9095760	+	Known	YES	0.0141792	0.0195897	0.132123	0.461392	0.903603	1.33227e-15	1.35228e-14	0.400267	0.00012011	0.000504187	0.0339988	0.363481	BOTH
FBgn0003607	Su(var)205	2L:8209626-8211122	-	Known	YES	0.00545108	0.148725	0.476215	0.0302364	0.664932	0	0	0.236532	0.000390863	0.00146043	0.789986	1	BASELINE
FBgn0003612	Su(var)2-10	2R:5003627-5009505	+	Known	YES	0.0034097	0.253661	0.624228	0.0533745	0.680156	0	0	0.359807	0.000799	0.00277309	0.0473514	0.434826	BOTH
FBgn0003638	su(w[a])	X:906812-940073	+	Known	YES	0.0330445	0.000343022	0.00562096	0.279325	0.835349	5.44339e-07	2.70925e-06	0.180595	0.00341656	0.0102201	0.925291	1	BASELINE
FBgn0003651	svp	3R:8084459-8128507	+	Known	YES	0.000904691	0.556788	0.886561	0.0228712	0.655419	0	0	0.35583	0.00195264	0.00618657	0.0325003	0.353779	BOTH
FBgn0003654	sw	X:20099035-20107456	-	Known	YES	0.0190899	0.00669431	0.0611054	0.943945	0.992479	8.6654e-11	5.69917e-10	0.287114	0.00213622	0.0067153	0.204095	0.880992	BOTH
FBgn0003655	swa	X:6257451-6259741	-	Known	YES	0.000121933	0.829233	1	0.0687088	0.688979	0	0	0.242406	0.000546786	0.0019731	0.682045	1	BASELINE
FBgn0003656	sws	X:7850853-7862269	-	Known	YES	0.000488378	0.665962	0.951096	0.510759	0.918935	1.08285e-05	4.77036e-05	0.426322	0.000113092	0.000478019	0.0133339	0.214616	BOTH
FBgn0003660	Syb	2R:6136940-6139922	-	Known	YES	0.000307544	0.731931	0.987586	0.763609	0.968391	1.11022e-16	1.26222e-15	0.248697	0.0136477	0.0353197	0.207719	0.887166	BOTH
FBgn0003676	CCT1	3R:18314827-18317161	-	Known	YES	1.73394e-05	0.935177	1	0.220416	0.807896	3.9968e-14	3.50397e-13	0.269184	1.97657e-05	9.68759e-05	0.954959	1	BASELINE
FBgn0003683	term	3L:18585403-18586871	-	Known	YES	0.00369338	0.234786	0.601277	0.552567	0.931155	0.580525	0.686019	0.211638	0.246214	0.429001	0.0825443	0.573686	NONE
FBgn0003687	Tbp	2R:17573697-17575147	-	Known	YES	0.00768859	0.0861683	0.345604	0.106206	0.722409	5.28466e-14	4.5685e-13	0.324375	0.000255659	0.000996336	0.205352	0.882783	BASELINE
FBgn0003701	thr	2R:13748778-13753468	-	Known	YES	0.00114447	0.508639	0.85453	0.116942	0.732468	0	0	0.373849	0.000132196	0.000549793	0.0753127	0.549153	BOTH
FBgn0003710	tipE	3L:4188499-4193788	+	Known	YES	0.000313504	0.729446	0.986339	0.11424	0.729095	9.06826e-09	5.18213e-08	0.781461	3.51956e-21	1.1546e-19	0.000792624	0.033135	BOTH
FBgn0003714	tko	X:2336346-2338009	-	Known	YES	7.82369e-05	0.862834	1	0.0591374	0.685423	2.71945e-06	1.26943e-05	0.164467	0.00126516	0.00419723	1	1	NONE
FBgn0003716	tkv	2L:5219000-5271384	-	Known	YES	4.83377e-05	0.89198	1	0.701493	0.957915	0.0363383	0.0788907	0.270104	0.00529891	0.0151377	0.200972	0.875055	BOTH
FBgn0003719	tld	3R:20575453-20579232	+	Known	YES	0.0155815	0.0143777	0.106364	0.727182	0.962316	0.146664	0.24245	0.358673	0.000575052	0.0020651	0.058258	0.481206	BASELINE
FBgn0003720	tll	3R:26678037-26680122	+	Known	RARE	0.000495175	0.663787	0.949712	0.992694	0.998683	0.794573	0.855117	0.125103	0.0184374	0.0461478	1	1	NONE
FBgn0003721	Tm1	3R:11107093-11134501	+	Known	YES	0.0011298	0.511369	0.856891	0.947549	0.992718	0.00621386	0.0174279	0.296763	4.01391e-08	3.0194e-07	1	1	BASELINE
FBgn0003731	Egfr	2R:17409925-17447482	+	Known	YES	0.029577	0.000713445	0.0102352	0.0930788	0.713763	2.22045e-16	2.42491e-15	0.479112	8.23066e-11	8.68311e-10	0.466538	1	BOTH
FBgn0003732	Top2	2L:19447365-19453490	-	Known	YES	0.00930295	0.0589851	0.274437	0.209347	0.799683	0	0	0.223547	0.00182748	0.00583302	0.649696	1	BASELINE
FBgn0003733	tor	2R:3592688-3596689	-	Known	YES	7.59018e-07	0.986423	1	0.165642	0.768518	0	0	0.367925	9.39758e-05	0.000404198	0.103625	0.644812	BOTH
FBgn0003741	tra	3L:16583159-16584150	-	Known	YES	0.0239907	0.00233693	0.0269708	0.770013	0.968582	0.100031	0.179467	0.245962	7.74291e-06	4.07146e-05	0.999999	1	NONE
FBgn0003742	tra2	2R:10489509-10491842	-	Known	YES	0.00478362	0.176206	0.522155	0.104875	0.722409	1.11022e-16	1.26222e-15	0.339415	0.000363602	0.00136711	0.12407	0.702787	BASELINE
FBgn0003744	trc	3L:19823964-19827404	-	Known	YES	0.0240571	0.00230405	0.0266647	0.300043	0.845307	2.10942e-15	2.09356e-14	0.294268	0.00290289	0.00882528	0.151673	0.76896	BASELINE
FBgn0003747	Gr5a	X:5574650-5576521	+	Known	YES	1.02609e-05	0.950112	1	0.751465	0.966803	0.667046	0.756137	0.020579	0.628838	0.894715	1	1	NONE
FBgn0003748	Treh	2R:16961523-16976450	+	Known	YES	0.00441606	0.193804	0.547772	0.520605	0.922272	0	0	0.674595	2.19907e-19	5.92196e-18	0.212258	0.895592	BOTH
FBgn0003751	trk	2L:10271443-10272324	-	Known	YES	0.00185545	0.399938	0.76885	0.249602	0.821799	0	0	0.160818	0.00154776	0.00503853	1	1	BASELINE
FBgn0003861	trp	3R:25740243-25746011	-	Known	YES	0.0140036	0.0203673	0.135759	0.68953	0.954726	0	0	0.497705	3.95487e-06	2.19929e-05	0.00413573	0.101479	BOTH
FBgn0003862	trx	3R:10089080-10112625	-	Known	YES	0.00679518	0.106782	0.393811	0.224378	0.809326	0.00119188	0.00395202	0.486075	3.07029e-12	3.81533e-11	0.74551	1	BOTH
FBgn0003863	alphaTry	2R:7231765-7232624	-	Known	YES	0.0437351	3.62e-05	0.000837018	0.228386	0.812286	5.15612e-07	2.572e-06	0.538284	2.47856e-10	2.4673e-09	0.0679679	0.521312	BOTH
FBgn0003865	tsg	X:11882095-11882981	-	Known	YES	0.00130616	0.480104	0.833366	0.857503	0.98297	0.899024	0.930795	0.146207	0.267008	0.457807	0.32295	1	NONE
FBgn0003866	tsh	2L:21828593-21837011	+	Known	YES	0.00215258	0.364569	0.739974	0.780229	0.970529	9.81014e-10	6.02413e-09	0.551753	9.17896e-08	6.56588e-07	0.00227754	0.0692285	BOTH
FBgn0003867	tsl	3R:17603836-17608258	-	Known	YES	0.0064936	0.114908	0.410794	0.484306	0.910832	5.20297e-06	2.36259e-05	0.565866	1.757e-15	3.17558e-14	0.630325	1	BOTH
FBgn0003870	ttk	3R:27539589-27561114	+	Known	YES	0.0231923	0.00277152	0.0308912	0.245671	0.818184	1.17288e-09	7.14863e-09	0.359498	0.00169648	0.00545958	0.0312538	0.345824	BASELINE
FBgn0003882	tub	3R:213464-215535	+	Known	YES	0.00615148	0.124959	0.431018	0.200512	0.792113	0	0	0.263644	0.00372373	0.0110385	0.266438	0.987041	BASELINE
FBgn0003884	alphaTub84B	3R:2912321-2914561	+	Known	YES	0.00410334	0.210404	0.57059	0.0134923	0.640933	2.27174e-05	9.67958e-05	0.355633	0.00712946	0.0197463	0.0139763	0.220071	BOTH
FBgn0003885	alphaTub84D	3R:3356475-3358454	+	Known	YES	0.044133	3.32972e-05	0.000778491	0.635446	0.946814	0.000776956	0.00266918	0.220506	2.05678e-05	0.000100595	1	1	BASELINE
FBgn0003886	alphaTub85E	3R:5556943-5558972	-	Known	YES	0.00015436	0.808254	1	0.319531	0.853914	1.28944e-06	6.21827e-06	0.316745	3.64386e-07	2.38097e-06	1	1	BOTH
FBgn0003887	betaTub56D	2R:15334824-15339105	-	Known	YES	0.00181054	0.405706	0.773375	0.0346694	0.665891	0.0176283	0.0428324	0.367918	0.0158679	0.040389	0.0045279	0.107817	BOTH
FBgn0003888	betaTub60D	2R:20193404-20200622	+	Known	YES	0.00545875	0.148439	0.475921	0.915199	0.990269	0.191478	0.298737	0.56015	1.45232e-11	1.67212e-10	0.0823957	0.573129	BOTH
FBgn0003889	betaTub85D	3R:5234105-5236004	-	Known	YES	0.00770945	0.0857419	0.344776	0.0178063	0.643733	0.186134	0.29226	0	1	1	1	1	NONE
FBgn0003890	betaTub97EF	3R:23792730-23814106	-	Known	YES	0.000980292	0.540742	0.875059	0.672839	0.953166	0.000302633	0.00111622	0.683772	1.74925e-25	8.95377e-24	0.999999	1	BOTH
FBgn0003891	tud	2R:17070827-17080418	+	Known	YES	0.0570237	2.21422e-06	7.06337e-05	0.0252273	0.655419	7.43106e-10	4.59774e-09	0.364456	0.000276731	0.00107074	0.0702934	0.52954	BOTH
FBgn0003892	ptc	2R:4537154-4552728	+	Known	YES	0.00374471	0.231554	0.597132	0.509597	0.918359	1.3642e-09	8.27554e-09	0.283704	0.000509419	0.00184781	0.367763	1	BASELINE
FBgn0003896	tup	2L:18859507-18881261	-	Known	YES	0.0100391	0.0497678	0.245811	0.536469	0.927088	1.76953e-05	7.64075e-05	0.262654	0.00372318	0.0110385	0.271753	0.996474	BASELINE
FBgn0003900	twi	2R:18872897-18935848	+	Known	YES	0.00337034	0.256425	0.627255	0.500785	0.915961	0.735903	0.811013	0.0433198	1	1	0.590751	1	NONE
FBgn0003916	snRNA:U1:21D	2L:901491-901654	-	Known	YES	0.00492949	0.169738	0.511533	0.198752	0.790313	0.00685662	0.0189923	0.162145	0.00370602	0.0109967	1	1	BASELINE
FBgn0003920	snRNA:U2:14B	X:16148705-16148896	+	Known	YES	0.00118712	0.50084	0.84826	0.0144642	0.640933	0.000614885	0.00215187	0.12562	0.0319943	0.0751539	0.969199	1	BASELINE
FBgn0003922	snRNA:U2:38ABa	2L:19815614-19815805	-	Known	RARE	0.00189829	0.394545	0.764762	0.771929	0.968685	0.000401005	0.00144953	0.00512175	0.903301	1	0.999999	1	NONE
FBgn0003923	snRNA:U2:38ABb	2L:19812646-19812836	+	Known	YES	0	1	1	0.566986	0.935624	0.0043778	0.0127788	0.089147	0.526902	0.782939	0.526983	1	NONE
FBgn0003930	snRNA:U4:39B	2L:21215036-21215178	-	Known	YES	0	1	1	0.555685	0.93257	0.00530273	0.0151437	0.329648	0.999999	1	3.18752e-05	0.00250864	ETOH
FBgn0003931	snRNA:U4:38AB	2L:19810734-19810875	+	Known	YES	0.0527957	5.39161e-06	0.000157323	0.54854	0.93048	0.500152	0.615544	0.473438	4.93058e-05	0.000223812	0.00274003	0.0779501	BOTH
FBgn0003933	snRNA:U5:14B	X:16148041-16148150	-	Known	YES	0.0462906	2.11617e-05	0.000523606	0.256081	0.824795	0.000784841	0.00269405	0.149312	0.0527858	0.116202	0.645566	1	BASELINE
FBgn0003934	snRNA:U5:23D	2L:3048701-3048831	+	Known	YES	0.00679412	0.106809	0.393811	0.321638	0.854197	0.812279	0.868179	0.325019	0.00679084	0.0189383	0.0412789	0.405021	BASELINE
FBgn0003935	snRNA:U5:34A	2L:13244848-13244974	+	Known	YES	0.00556853	0.144409	0.468151	0.32232	0.854197	0.145136	0.240454	0.236445	0.384283	0.612351	0.0256017	0.311057	NONE
FBgn0003936	snRNA:U5:35D	2L:15751557-15751682	-	Known	YES	0.0371365	0.000144895	0.00271999	0.666978	0.952489	0.211422	0.321974	0.0954452	0.134657	0.259777	0.885612	1	NONE
FBgn0003938	snRNA:U5:63BC	3L:3090801-3090923	+	Known	YES	0.00110139	0.516732	0.859902	0.374164	0.874328	0.492776	0.608992	0.328466	0.934404	1	9.16733e-05	0.00605026	ETOH
FBgn0003941	RpL40	2L:4227699-4228561	+	Known	YES	0.06432	4.74946e-07	1.78115e-05	0.999715	0.999951	0.072871	0.13934	0.336926	0.0779123	0.162889	0.00368822	0.0936781	ETOH
FBgn0003942	RpS27A	2L:10408352-10410456	+	Known	YES	0.00429467	0.200059	0.556146	0.293741	0.842637	0.262111	0.379267	0.0884523	0.0451336	0.101366	1	1	NONE
FBgn0003943	Ubi-p63E	3L:3899259-3903184	-	Known	YES	0.00776562	0.0846045	0.34204	0.0659564	0.687533	0.264753	0.382229	0.574313	4.72902e-07	3.03445e-06	0.000184925	0.0108202	BOTH
FBgn0003944	Ubx	3R:12482345-12560148	-	Known	YES	0.0495435	1.06831e-05	0.000289782	0.457317	0.902441	3.29003e-12	2.42562e-11	0.537248	6.47675e-06	3.45389e-05	0.000317615	0.0168628	BOTH
FBgn0003950	unc	X:20982441-20987941	-	Known	YES	0.00252517	0.326037	0.702826	0.86199	0.983479	3.63104e-07	1.83778e-06	0.648345	8.27467e-17	1.71568e-15	0.122028	0.69709	BOTH
FBgn0003961	Uro	2L:7780085-7781415	+	Known	YES	0.0154131	0.01492	0.109219	0.107055	0.722943	1.14328e-07	6.03434e-07	0.623829	6.37596e-19	1.63931e-17	0.697214	1	BOTH
FBgn0003963	ush	2L:476220-540560	+	Known	YES	0.00350559	0.247081	0.616407	0.17163	0.771601	0.0908655	0.166127	0.313303	0.000415046	0.00153964	0.218967	0.907792	BOTH
FBgn0003964	usp	X:1932831-1936344	-	Known	YES	0.000725904	0.598652	0.911366	0.0617268	0.685423	0	0	0.219031	0.000656898	0.00232728	0.865127	1	BASELINE
FBgn0003965	v	X:10818005-10819664	+	Known	YES	0.0238906	0.00238743	0.0274215	0.143925	0.754338	9.01576e-06	4.00069e-05	0.574143	1.25822e-09	1.14351e-08	0.00695679	0.14469	BOTH
FBgn0003969	vap	X:15893984-15899845	-	Known	YES	0.00110636	0.515787	0.859394	0.076102	0.697225	0	0	0.26576	7.76814e-05	0.00033903	0.776227	1	BASELINE
FBgn0003975	vg	2R:8772137-8786890	+	Known	YES	0.00836951	0.0733502	0.314036	0.922243	0.990437	0.335658	0.456333	0.304288	0.000121691	0.000510279	0.393143	1	BASELINE
FBgn0003977	vir	2R:19247715-19253878	-	Known	YES	4.68864e-05	0.893605	1	0.678719	0.953312	0.000461472	0.00165105	0.0877827	0.0480204	0.107032	0.999999	1	NONE
FBgn0003978	vls	2L:20064261-20065679	-	Known	YES	0.021047	0.00438965	0.0442888	0.129106	0.744257	0.0152347	0.0378199	0.591017	3.84298e-16	7.46486e-15	0.487417	1	BOTH
FBgn0003979	Vm26Aa	2L:5959596-5960340	-	Known	YES	0.024397	0.0021429	0.0251382	0.297465	0.843902	0.000269807	0.0010032	0.383481	0.0133864	0.0347293	0.0026558	0.076892	BOTH
FBgn0003980	Vm26Ab	2L:5957004-5957639	+	Known	YES	0.00162084	0.431474	0.795317	0.283859	0.837664	1.38001e-12	1.04667e-11	0.313634	0.106465	0.212631	0.00685937	0.143108	BOTH
FBgn0003983	Vm34Ca	2L:13411141-13411631	-	Known	YES	0.000365064	0.708981	0.975859	0.637344	0.94724	1.06189e-05	4.68107e-05	0.307215	0.0340776	0.0794852	0.0241154	0.300902	BASELINE
FBgn0003984	vn	3L:5806438-5838764	-	Known	YES	0.00116816	0.504282	0.850625	0.078931	0.700819	0	0	0.298852	0.00127689	0.00423264	0.194397	0.861431	BASELINE
FBgn0003996	w	X:2684632-2690499	-	Known	YES	0.00444703	0.192245	0.545597	0.0238827	0.655419	0	0	0.574154	7.36158e-15	1.22976e-13	0.407213	1	BOTH
FBgn0003997	hid	3L:18160845-18178741	-	Known	YES	0.0042367	0.203129	0.560483	0.126293	0.742215	0.970158	0.980308	0.435555	0.000117494	0.00049438	0.00890457	0.17011	BOTH
FBgn0004003	wbl	2R:15136900-15138422	+	Known	YES	0.150809	2.85271e-15	5.16987e-13	0.947607	0.992718	3.02909e-06	1.40711e-05	0.542561	4.80133e-13	6.54367e-12	0.35682	1	BOTH
FBgn0004009	wg	2L:7307159-7316265	+	Known	YES	0.00844262	0.0721006	0.311109	0.191766	0.787075	0.0530065	0.107658	0.132254	0.45829	0.702886	0.28746	1	BASELINE
FBgn0004028	wupA	X:17999601-18010955	-	Known	YES	0.00135598	0.471842	0.827766	0.840736	0.980372	0.000116373	0.000455225	0.383779	1.14475e-06	6.92657e-06	0.323766	1	BOTH
FBgn0004034	y	X:250542-255278	+	Known	YES	0.0175477	0.00935423	0.0784244	0.239133	0.813343	0.42605	0.546082	0.222479	0.000946365	0.0032248	0.770539	1	BASELINE
FBgn0004045	Yp1	X:9947844-9949531	+	Known	YES	0.000412906	0.691417	0.966162	0.728299	0.962489	0.784909	0.84779	0.497666	7.31073e-06	3.86421e-05	0.00282687	0.0794438	BOTH
FBgn0004047	Yp3	X:13653579-13655580	+	Known	YES	0.00117446	0.503134	0.849803	0.521565	0.922613	0.000107942	0.000424025	0.797999	7.99565e-21	2.51473e-19	6.57434e-05	0.00460163	BOTH
FBgn0004049	yrt	3R:9254589-9260706	-	Known	YES	0.00466808	0.181531	0.529953	0.143607	0.754338	3.10032e-06	1.4384e-05	0.415553	2.19891e-05	0.000107109	0.0469994	0.433447	BOTH
FBgn0004050	z	X:2341802-2344583	+	Known	YES	0.00403229	0.214405	0.575911	0.00185204	0.553421	4.10272e-12	2.99579e-11	0.200551	0.00738809	0.0203961	0.604206	1	BASELINE
FBgn0004052	Z600	3L:15502161-15502613	+	Known	YES	0.00223539	0.355492	0.730932	0.477996	0.907563	0.243411	0.358519	0.210509	1	1	0.0133776	0.214908	NONE
FBgn0004053	zen	3R:2578586-2579916	-	Known	YES	8.1457e-06	0.955544	1	0.860278	0.983367	0.0657918	0.128187	0.0675984	0.155527	0.293436	0.999999	1	BASELINE
FBgn0004054	zen2	3R:2568857-2569858	-	Known	RARE	0.000728836	0.597915	0.910698	0.528326	0.924569	0.294677	0.41447	0.169259	0.0323712	0.0759382	0.583799	1	NONE
FBgn0004055	uzip	2R:20899585-20919260	+	Known	YES	0.012039	0.031587	0.182715	0.440659	0.895391	0.277306	0.395817	0.316017	1.34853e-06	8.07074e-06	0.891753	1	BASELINE
FBgn0004057	Zw	X:19561285-19566386	+	Known	YES	0.00678803	0.106967	0.393998	0.781455	0.970529	0.983314	0.989299	0.374723	4.77718e-09	4.01818e-08	1	1	BOTH
FBgn0004066	Prosalpha4	X:16170303-16171620	+	Known	YES	0.00134614	0.473456	0.828523	0.00972915	0.640933	8.88004e-09	5.0763e-08	0.298602	0.000286105	0.00110332	0.335921	1	BASELINE
FBgn0004087	Dhfr	3R:12306889-12307600	+	Known	YES	0.00821731	0.0760267	0.32135	0.116926	0.732468	2.35012e-12	1.75505e-11	0.285233	0.000115608	0.000487361	0.545282	1	BASELINE
FBgn0004101	bs	2R:20230384-20263996	+	Known	YES	0.00659408	0.112128	0.405179	0.0932617	0.713763	1.4071e-11	9.82505e-11	0.195937	0.308398	0.514872	0.101034	0.63565	BASELINE
FBgn0004102	oc	X:8524192-8544714	-	Known	YES	7.48182e-05	0.865836	1	0.553575	0.931313	5.30151e-07	2.64216e-06	0.262888	0.000788106	0.00273982	0.459465	1	BASELINE
FBgn0004103	Pp1-87B	3R:8249343-8251639	-	Known	YES	0.000797715	0.581106	0.901344	0.504242	0.917146	0	0	0.214259	1	1	0.00625	0.134755	BASELINE
FBgn0004106	Cdk1	2L:10384739-10386262	-	Known	YES	0.000690234	0.607783	0.916568	0.0138024	0.640933	0	0	0.267541	0.000448617	0.00165011	0.501071	1	BASELINE
FBgn0004107	Cdk2	3R:16561345-16564136	+	Known	YES	0.0020469	0.376624	0.74988	0.0263094	0.657086	0	0	0.320324	0.000207791	0.000826996	0.241947	0.949279	BASELINE
FBgn0004108	Nrt	3L:16759172-16770565	+	Known	YES	0.0115279	0.0354485	0.197652	0.987682	0.99772	0.0825186	0.153829	0.580169	1.19767e-11	1.39715e-10	0.0401965	0.399464	BOTH
FBgn0004110	tin	3R:17204699-17207692	+	Known	RARE	1.13685e-05	0.947492	1	0.980553	0.997335	0.738481	0.813025	0.132479	0.547488	0.806132	0.248076	0.95918	NONE
FBgn0004117	Tm2	3R:11135915-11140919	+	Known	YES	0.0050851	0.163136	0.500269	0.758739	0.967308	0	0	0.391376	5.27033e-06	2.85827e-05	0.169551	0.809937	BOTH
FBgn0004118	nAChRbeta2	3R:20334950-20340828	-	Known	YES	0.000220303	0.771876	1	0.138181	0.750086	0.000179014	0.000682962	0.326172	0.113831	0.224972	0.00383864	0.0964753	BOTH
FBgn0004132	boca	2R:3453378-3454243	-	Known	YES	0.00131812	0.4781	0.832349	0.0763734	0.697225	0.000628943	0.00219625	0.137291	0.0199487	0.0495238	0.967442	1	NONE
FBgn0004133	blow	2R:3467993-3474584	-	Known	YES	0.036588	0.000162619	0.00300889	0.94134	0.992091	3.51067e-08	1.92041e-07	0.593164	2.76289e-14	4.34075e-13	0.175441	0.824042	BOTH
FBgn0004143	nullo	X:6943509-6944354	+	Known	RARE	0.00760186	0.0879667	0.349936	0.422675	0.890333	0.0446936	0.0936804	0.113496	0.793627	1	0.252861	0.965677	NONE
FBgn0004167	kst	3L:3336860-3368133	+	Known	YES	0.00372691	0.232668	0.598071	0.0826097	0.702796	1.08995e-09	6.65767e-09	0.402799	1.12202e-06	6.80004e-06	0.214276	0.900302	BOTH
FBgn0004168	5-HT1A	2R:14954660-15009463	+	Known	YES	0.0203364	0.00511501	0.049831	0.23641	0.813008	1.22791e-11	8.62417e-11	0.360429	0.00118956	0.00396683	0.0372511	0.382869	BOTH
FBgn0004169	up	X:13487507-13496611	-	Known	YES	0.00936029	0.0582062	0.271992	0.990949	0.998328	6.25056e-13	4.87421e-12	0.299106	4.09974e-05	0.000189224	0.569839	1	BASELINE
FBgn0004170	sc	X:290093-291530	+	Known	YES	0.000374096	0.705568	0.974432	0.437658	0.89436	0.0621675	0.12245	0.107896	1	1	0.190393	0.852929	NONE
FBgn0004171	Mst98Cb	3R:24118520-24119585	+	Known	YES	0.000379009	0.703731	0.973859	0.378519	0.875148	0.242483	0.357681	0.0874473	0.948038	1	0.337506	1	NONE
FBgn0004172	Mst84Da	3R:3191572-3191984	+	Known	YES	0.000128533	0.824745	1	0.160497	0.766052	0.000936248	0.00317091	0	1	1	1	1	NONE
FBgn0004173	Mst84Db	3R:3190882-3191349	-	Known	YES	0.00506081	0.164147	0.501947	0.468357	0.904715	0.0481362	0.0995208	0.0632879	0.762841	1	0.58949	1	NONE
FBgn0004174	Mst84Dc	3R:3189976-3190395	-	Known	YES	0.00203905	0.377541	0.750627	0.734599	0.96379	0.0338804	0.0743103	0.0501023	0.247248	0.430467	1	1	NONE
FBgn0004175	Mst84Dd	3R:3189029-3189495	-	Known	YES	0.00195296	0.387815	0.759326	0.950207	0.992801	0.0204727	0.0487021	0.000360513	1	1	0.996028	1	NONE
FBgn0004177	mts	2L:7827650-7833576	+	Known	YES	0.00187838	0.397038	0.766649	0.0181593	0.645654	0	0	0.152777	0.0482289	0.107411	0.636301	1	BASELINE
FBgn0004179	Csp	3L:22260482-22266845	+	Known	YES	0.00588189	0.133565	0.447134	0.948444	0.992718	8.38205e-06	3.73134e-05	0.211883	0.00841729	0.0229362	0.492328	1	BASELINE
FBgn0004181	Ebp	2R:21062649-21064238	-	Known	YES	0.00600844	0.129446	0.439264	0.569504	0.935901	0.0114786	0.0296621	0.102615	0.796698	1	0.308068	1	NONE
FBgn0004183	snRNA:U1:82Eb	3R:773655-773818	-	Known	YES	0	1	1	0.117742	0.732912	3.63201e-05	0.000151387	0.29507	2.40889e-05	0.000116475	0.679362	1	BASELINE
FBgn0004185	snRNA:U1:95Ca	3R:19685189-19685352	-	Known	YES	0.00299935	0.284394	0.659624	0.647394	0.948606	1.36362e-11	9.54136e-11	0.197247	0.00314274	0.00948906	0.787762	1	BASELINE
FBgn0004186	snRNA:U1:95Cb	3R:19653592-19653755	+	Known	YES	0.0337489	0.000295684	0.0049816	0.81758	0.975959	7.79913e-05	0.000311891	0.313033	0.0677969	0.144484	0.0109504	0.192418	BOTH
FBgn0004187	snRNA:U1:95Cc	3R:19652056-19652219	+	Known	YES	0.0229676	0.00290793	0.0320494	0.788132	0.971306	0.897087	0.929392	0.34614	0.147023	0.280006	0.00115988	0.0436937	BOTH
FBgn0004188	snRNA:U6:96Aa	3R:20381810-20381916	+	Known	YES	1.11022e-16	1	1	0.158159	0.764643	0.901337	0.932393	0.148125	0.891289	1	0.103927	0.645718	NONE
FBgn0004189	snRNA:U6:96Ab	3R:20382414-20382520	+	Known	YES	0.0100908	0.0491801	0.24374	0.284681	0.837832	0.000797958	0.00273516	0.181526	1	1	0.019158	0.263999	BASELINE
FBgn0004190	snRNA:U6:96Ac	3R:20382937-20383043	+	Known	RARE	-2.22045e-16	1	1	0.041777	0.672871	0.708285	0.78927	0.0144055	0.89007	1	0.93483	1	NONE
FBgn0004191	snRNA:U2:34ABa	2L:13211925-13212116	-	Known	YES	0.0728783	7.74606e-08	3.4766e-06	0.875007	0.984909	0.418283	0.538536	0.82746	7.4323e-34	8.62224e-32	0.323549	1	BOTH
FBgn0004192	snRNA:U2:34ABb	2L:13215839-13216030	+	Known	YES	0.00772349	0.0854561	0.344361	0.976594	0.996813	0.000119372	0.000466303	0.236843	0.0309367	0.0729764	0.179096	0.830622	ETOH
FBgn0004197	Ser	3R:22997812-23019989	-	Known	YES	0.000157409	0.806407	1	0.265057	0.829235	6.02258e-11	4.00581e-10	0.371703	0.00512531	0.0146956	0.00959848	0.17809	BOTH
FBgn0004198	ct	X:7503181-7572892	+	Known	YES	0.00647164	0.115525	0.412176	0.060138	0.685423	0	0	0.255644	0.0110032	0.029128	0.197786	0.867896	BASELINE
FBgn0004227	nonA	X:16255602-16265580	+	Known	YES	0.000728693	0.597951	0.910711	0.769961	0.968582	0.000389016	0.00140985	0.112553	0.127896	0.248622	0.747566	1	NONE
FBgn0004228	mex1	3L:15510524-15512692	-	Known	YES	0.0166122	0.0114712	0.0905322	0.609738	0.943101	3.25052e-06	1.50496e-05	0.566343	2.27043e-08	1.76369e-07	0.00224705	0.0685503	BOTH
FBgn0004237	Hrb87F	3R:9482568-9486253	-	Known	YES	0.00221238	0.357982	0.73343	0.513478	0.920096	2.5584e-06	1.19756e-05	0.428683	0.000172892	0.000701335	0.00935058	0.175334	BOTH
FBgn0004240	DptA	2R:14753270-14753765	+	Known	YES	0.000782048	0.584844	0.904306	0.634172	0.946814	0.000278846	0.00103463	0.552004	1.92062e-06	1.12555e-05	0.000301024	0.0162519	BOTH
FBgn0004242	Syt1	2L:2772327-2799979	-	Known	YES	0.00178708	0.408768	0.776078	0.157067	0.762718	1.70511e-10	1.09922e-09	0.260699	0.043634	0.0984466	0.0818095	0.570472	BASELINE
FBgn0004244	Rdl	3L:9138938-9175249	-	Known	YES	0.0187667	0.00717936	0.064359	0.0595136	0.685423	1.11022e-16	1.26222e-15	0.212547	0.136447	0.262835	0.127734	0.711976	BASELINE
FBgn0004359	T48	3R:22707456-22736719	+	Known	YES	0.0294432	0.000733924	0.0104752	0.708759	0.958858	1.06557e-11	7.52658e-11	0.261867	5.98269e-06	3.21229e-05	1	1	BASELINE
FBgn0004360	Wnt2	2R:5381671-5390693	+	Known	YES	0.0010761	0.521588	0.863758	0.327873	0.856175	1.36929e-06	6.58062e-06	0.288409	0.000151752	0.000622892	0.483529	1	BASELINE
FBgn0004362	HmgD	2R:17588963-17604232	+	Known	YES	0.00216878	0.362768	0.738286	0.0287959	0.660983	0	0	0.26331	0.00443669	0.0129201	0.25003	0.96142	BASELINE
FBgn0004363	porin	2L:10847227-10850848	-	Known	YES	0.00612123	0.125893	0.432356	0.206581	0.797855	2.56417e-12	1.91149e-11	0.588438	3.89322e-16	7.55807e-15	0.514959	1	BOTH
FBgn0004364	18w	2R:15999016-16004437	+	Known	YES	0.00212839	0.36728	0.742582	0.000458877	0.429552	2.33067e-09	1.38871e-08	0.315502	5.99941e-06	3.2193e-05	0.686352	1	BOTH
FBgn0004367	mei-41	X:16285731-16293883	+	Known	YES	0.00703322	0.100812	0.37968	0.0536987	0.680656	0	0	0.303067	2.593e-05	0.000124389	0.597761	1	BASELINE
FBgn0004368	Ptp4E	X:4833161-4849949	+	Known	YES	0.00999413	0.0502845	0.247367	0.873533	0.984528	4.60719e-08	2.49902e-07	0.543666	9.61711e-07	5.87845e-06	0.00082768	0.0342165	BOTH
FBgn0004369	Ptp99A	3R:25203368-25312853	+	Known	YES	2.19132e-05	0.927149	1	0.879865	0.98537	2.92251e-09	1.72966e-08	0.233142	0.0240738	0.0585082	0.220088	0.909851	BASELINE
FBgn0004370	Ptp10D	X:11516048-11571371	+	Known	YES	5.98761e-06	0.96188	1	0.0643146	0.686739	4.97888e-11	3.33345e-10	0.373456	0.00175019	0.00561197	0.018794	0.261346	BOTH
FBgn0004372	aly	3L:3024129-3026521	-	Known	YES	0.00119765	0.498945	0.847029	0.787263	0.971306	0.37936	0.499923	0.238378	0.00118636	0.00395772	0.593777	1	ETOH
FBgn0004373	fwd	3L:305393-319884	-	Known	YES	1.19938e-05	0.946069	1	0.937765	0.992025	1.22125e-15	1.24905e-14	0.417477	1.25109e-05	6.35533e-05	0.0571607	0.477436	BOTH
FBgn0004374	neb	2L:20075757-20089698	+	Known	YES	0.0015392	0.443326	0.805167	0.853669	0.982414	3.52478e-11	2.39191e-10	0.484162	2.53789e-08	1.95874e-07	0.0811	0.567719	BOTH
FBgn0004378	Klp61F	3L:1241568-1245910	-	Known	YES	0.00405981	0.212845	0.573545	0.0861684	0.707639	0	0	0.346898	6.59984e-05	0.000292303	0.201926	0.877773	BASELINE
FBgn0004379	Klp67A	3L:9355736-9360146	-	Known	YES	5.6824e-06	0.962864	1	0.0211246	0.654925	0	0	0.281251	0.00209576	0.00660008	0.233279	0.935322	BASELINE
FBgn0004380	Klp64D	3L:5349964-5352492	-	Known	YES	0.00348525	0.248459	0.617951	0.116386	0.731969	0	0	0.226409	0.000195826	0.000784412	1	1	BASELINE
FBgn0004381	Klp68D	3L:11788714-11791975	+	Known	YES	0.0177799	0.00889359	0.0753158	0.00693061	0.640933	3.90799e-14	3.43239e-13	0.34742	1.66395e-05	8.26353e-05	0.31327	1	BASELINE
FBgn0004387	Klp98A	3R:23373497-23384867	-	Known	YES	0.00179023	0.408355	0.77591	0.439514	0.895214	8.14564e-09	4.67242e-08	0.666469	4.23146e-22	1.53371e-20	0.821226	1	BOTH
FBgn0004389	bnk	3R:27019084-27020111	+	Known	YES	0.0106653	0.0431204	0.224522	0.416408	0.88707	0.290029	0.409703	0.174884	0.77374	1	0.063876	0.504457	NONE
FBgn0004390	RasGAP1	3L:9832193-9848385	-	Known	YES	0.0287563	0.000848793	0.0118081	0.132418	0.74803	2.22045e-16	2.42491e-15	0.494966	7.40747e-11	7.84434e-10	0.342353	1	BOTH
FBgn0004391	shtd	X:15349577-15356474	-	Known	YES	6.71246e-06	0.959641	1	0.18041	0.779905	5.12498e-09	2.98728e-08	0.25246	0.00013981	0.000578072	0.808481	1	BASELINE
FBgn0004394	pdm2	2L:12657165-12686306	+	Known	YES	0.00616869	0.12443	0.430169	0.498799	0.915064	0.0070925	0.0195591	0.440301	1.97828e-06	1.15631e-05	0.0608049	0.491965	BOTH
FBgn0004395	unk	3R:18975375-18983584	-	Known	YES	0.0277612	0.00104804	0.0141398	0.948396	0.992718	0	0	0.309506	1.22434e-07	8.59654e-07	1	1	BASELINE
FBgn0004396	CrebA	3L:15528495-15546314	+	Known	YES	0.0263855	0.00140343	0.0179249	0.0809172	0.702676	0.00795768	0.0216274	0.478635	6.61217e-10	6.23941e-09	0.292181	1	BOTH
FBgn0004397	Vinc	X:2108380-2116600	-	Known	YES	0.000903308	0.55709	0.886789	0.891313	0.986044	0	0	0.185561	0.00121941	0.0040595	1	1	ETOH
FBgn0004400	rhi	2R:13515996-13521021	-	Known	YES	0.0927162	1.11057e-09	7.53726e-08	0.875793	0.984909	0	0	0.799616	1.53645e-29	1.15759e-27	0.186834	0.846457	BOTH
FBgn0004401	Pep	3L:17631203-17638136	-	Known	YES	0.0301166	0.000636489	0.00936839	0.0744339	0.696501	3.95352e-08	2.15562e-07	0.488053	1.47265e-10	1.50529e-09	0.340239	1	BOTH
FBgn0004403	RpS14a	X:7827775-7828710	+	Known	YES	0.0120073	0.0318132	0.183517	0.409764	0.884957	0.655049	0.746857	0.191057	0.000168455	0.000684663	1	1	ETOH
FBgn0004404	RpS14b	X:7828931-7829825	+	Known	YES	0.00129491	0.482002	0.834112	0.054591	0.683125	2.65841e-10	1.69262e-09	0.0668873	0.143312	0.274123	1	1	ETOH
FBgn0004406	tam	2L:13823980-13827772	-	Known	YES	0.0166537	0.0113677	0.089901	0.154424	0.761659	7.26086e-13	5.62021e-12	0.36462	2.14495e-06	1.24785e-05	0.397331	1	BASELINE
FBgn0004414	msopa	3L:22075820-22076467	+	Known	YES	0.00800225	0.0799881	0.331286	0.583631	0.938267	0.000609177	0.00213413	0.0198644	0.640617	0.906924	0.999999	1	NONE
FBgn0004419	me31B	2L:10239341-10242172	+	Known	YES	0.0276313	0.00107731	0.0145056	0.0953814	0.714113	0	0	0.274201	0.00110827	0.0037224	0.338951	1	BASELINE
FBgn0004425	LysB	3L:1207371-1207981	+	Known	YES	0.208875	3.24576e-21	1.0992e-18	0.308552	0.847953	0.00136294	0.00446577	0.809621	3.1404e-38	5.08639e-36	1	1	BOTH
FBgn0004426	LysC	3L:1210485-1210971	+	Known	YES	0.0999174	2.33927e-10	1.7704e-08	0.845876	0.981157	0.151176	0.248373	0.840458	9.99608e-37	1.41409e-34	0.523527	1	BOTH
FBgn0004427	LysD	3L:1210717-1211196	-	Known	YES	0.360394	5.74857e-39	7.7093e-36	0.233628	0.813008	1.67845e-06	7.99531e-06	0.94025	9.0671e-44	2.81475e-41	3.8797e-06	0.000426475	BOTH
FBgn0004428	LysE	3L:1212827-1213406	+	Known	YES	0.0020889	0.371767	0.746585	0.354618	0.867925	1.29747e-06	6.25427e-06	0.890494	1.37633e-41	3.18235e-39	0.122473	0.698208	BOTH
FBgn0004429	LysP	3L:1218082-1218696	-	Known	YES	0.00369041	0.234974	0.60147	0.567589	0.935667	0.181962	0.286982	0.901406	2.20057e-53	2.16995e-50	1	1	BOTH
FBgn0004430	LysS	3L:1227747-1228238	+	Known	YES	0.0717015	9.94538e-08	4.3701e-06	0.869084	0.984045	0.0973528	0.175603	0.343076	0.00160614	0.00520381	0.0545325	0.465408	BOTH
FBgn0004431	LysX	3L:1194739-1195302	-	Known	YES	0.0315375	0.000471428	0.00728479	0.118884	0.735161	0.00577594	0.0163433	0.693985	2.71143e-21	9.00954e-20	0.288468	1	BOTH
FBgn0004432	Cyp1	X:16211706-16214403	-	Known	YES	8.76233e-05	0.854925	1	0.139274	0.750405	5.49194e-05	0.000223492	0.289759	0.000304977	0.00116817	0.387059	1	BASELINE
FBgn0004435	Galphaq	2R:8500245-8510702	+	Known	YES	0.001084	0.520062	0.862355	0.198205	0.789976	0.312617	0.433643	0.261554	0.00749852	0.0206542	0.207351	0.886714	BASELINE
FBgn0004436	Ubc6	3R:774477-778404	-	Known	YES	0.00516166	0.159995	0.494939	0.682249	0.953856	0	0	0.255084	0.154629	0.29202	0.0364951	0.377995	BASELINE
FBgn0004449	Ten-m	3L:22286144-22400963	-	Known	YES	0.00237727	0.340644	0.71658	0.0246539	0.655419	0	0	0.397807	5.55728e-09	4.62904e-08	0.797189	1	BOTH
FBgn0004456	mew	X:13108442-13152523	-	Known	YES	0.0253155	0.00176204	0.0213844	0.0842385	0.70601	0.000374263	0.00135962	0.490859	1.11398e-08	8.96934e-08	0.088066	0.592651	BOTH
FBgn0004462	Pk17E	X:18682497-18700090	+	Known	YES	0.0295869	0.000711951	0.0102181	0.291312	0.841553	0	0	0.281987	1.4828e-07	1.02693e-06	1	1	BASELINE
FBgn0004463	RpIII128	2R:7926546-7930128	+	Known	YES	0.0402939	7.45978e-05	0.00154481	0.216282	0.805309	0	0	0.501903	1.37526e-16	2.79107e-15	1	1	BOTH
FBgn0004465	Su(P)	3L:16603762-16605299	-	Known	YES	0.0294812	0.000728052	0.0104047	0.46451	0.904384	2.91511e-12	2.16061e-11	0.364138	9.91423e-07	6.05344e-06	0.484451	1	BOTH
FBgn0004507	GlyP	2L:2130813-2137296	+	Known	YES	0.0202904	0.00516594	0.050159	0.113718	0.729095	0.963515	0.975831	0.433833	2.63975e-12	3.30976e-11	1	1	BOTH
FBgn0004509	Fur1	3R:21173153-21298780	-	Known	YES	0.0224447	0.00325226	0.0350606	0.923357	0.990437	3.33067e-16	3.60914e-15	0.347262	0.0203127	0.0503195	0.00853626	0.165049	BASELINE
FBgn0004510	Ets97D	3R:22736497-22738608	-	Known	YES	0.00309997	0.276447	0.652115	0.171953	0.771831	0	0	0.298088	0.00358469	0.0106697	0.125151	0.705997	BASELINE
FBgn0004512	Mdr49	2R:8827828-8833852	-	Known	YES	0.000134102	0.821051	1	0.68503	0.954093	0.575847	0.682247	0.750233	1.4566e-23	6.13511e-22	0.0868423	0.589809	BOTH
FBgn0004513	Mdr65	3L:6233600-6238846	-	Known	YES	0.00316997	0.271082	0.645402	0.456707	0.902428	8.06447e-06	3.5957e-05	0.498748	9.65722e-06	4.99195e-05	0.00223207	0.0683421	BOTH
FBgn0004514	Oct-TyrR	3L:22028103-22058379	+	Known	YES	0.00113181	0.510994	0.856623	0.532097	0.925806	1.31554e-05	5.75533e-05	0.415301	0.00057127	0.00205394	0.00756265	0.152764	BOTH
FBgn0004516	Gad1	3L:4074077-4088744	-	Known	YES	0.00617466	0.124248	0.429626	0.361879	0.870219	1.46233e-09	8.85323e-09	0.389459	0.00396277	0.0116841	0.00562843	0.125887	BOTH
FBgn0004552	Akh	3L:4141467-4142070	+	Known	YES	0.00895311	0.0639834	0.288731	0.944746	0.992605	0.656183	0.747794	0.259577	0.0150996	0.0386504	0.155171	0.77834	BASELINE
FBgn0004554	Edg91	3R:13436578-13437233	-	Known	YES	0.00125413	0.488988	0.840096	0.299064	0.844434	0.000170725	0.000653051	0.17753	0.761454	1	0.0608078	0.491965	NONE
FBgn0004556	Dbp73D	3L:16721596-16723918	-	Known	YES	2.06184e-05	0.929328	1	0.853834	0.982414	0	0	0.338883	2.72372e-06	1.55488e-05	0.578953	1	BASELINE
FBgn0004567	slp2	2L:3836840-3839185	+	Known	YES	0.0176535	0.00914147	0.0769293	0.740254	0.964117	0.790152	0.851754	0	1	1	1	1	NONE
FBgn0004569	aos	3L:16463486-16476750	-	Known	YES	0.00862514	0.0690791	0.302945	0.0864396	0.707641	0.0254306	0.0585173	0.581423	3.83573e-08	2.89445e-07	0.000643592	0.0282342	BOTH
FBgn0004573	5-HT7	3R:26793958-26842597	-	Known	YES	0.0104655	0.0451341	0.230637	0.409231	0.884775	0.415097	0.535504	0.078558	1	1	0.367961	1	BASELINE
FBgn0004574	Rop	3L:4136359-4138996	-	Known	YES	0.00208477	0.372241	0.746903	0.648284	0.948861	0.79077	0.8522	0.0958844	0.0304429	0.0719889	1	1	NONE
FBgn0004575	Syn	3R:6016411-6048164	+	Known	YES	0.00145227	0.456508	0.816068	0.137556	0.750086	1.63114e-12	1.23157e-11	0.372584	0.00411036	0.0120715	0.0108905	0.191821	BOTH
FBgn0004577	Pxd	3R:12840298-12853709	+	Known	YES	0.029565	0.000715246	0.0102567	0.576358	0.936742	0.768489	0.83509	0.12895	0.00588822	0.0166665	1	1	NONE
FBgn0004580	Cbp53E	2R:12861432-12883562	+	Known	YES	6.27808e-05	0.877008	1	0.0970843	0.716713	8.10235e-05	0.000323322	0.401366	0.00030392	0.00116505	0.0195567	0.267297	BOTH
FBgn0004581	bgcn	2R:19740793-19746444	-	Known	YES	0.000994534	0.537815	0.873284	0.2478	0.820524	0.679172	0.766228	0.125474	0.0164969	0.0417901	1	1	BASELINE
FBgn0004583	ex	2L:431227-448701	+	Known	YES	8.57289e-05	0.856485	1	0.177413	0.778089	7.79443e-12	5.56774e-11	0.32353	0.000479092	0.00174931	0.163897	0.798486	BASELINE
FBgn0004584	Rrp1	2L:2969773-2972508	-	Known	YES	0.00369158	0.234899	0.601456	0.0174421	0.643733	5.9508e-14	5.11796e-13	0.243877	0.007133	0.0197512	0.302645	1	BASELINE
FBgn0004587	B52	3R:9487033-9492613	+	Known	YES	0.039864	8.16534e-05	0.00167232	0.809927	0.97447	3.1806e-09	1.8781e-08	0.695212	5.79038e-25	2.82582e-23	1	1	BOTH
FBgn0004588	Eig71Ea	3L:15642226-15642761	-	Known	RARE	0.00183344	0.40275	0.770809	0.346577	0.864632	0.24118	0.35619	0.0655621	0.316238	0.525215	0.897475	1	NONE
FBgn0004589	Eig71Eb	3L:15643036-15643641	+	Known	YES	0.00438629	0.195316	0.549591	0.36787	0.872544	0.41855	0.538694	0.144886	0.431025	0.670714	0.236963	0.940753	ETOH
FBgn0004590	Eig71Ec	3L:15644579-15645354	-	Known	RARE	0.00684422	0.105521	0.39109	0.869734	0.984045	0.909287	0.937915	0.246926	0.0126604	0.0330786	0.223237	0.916503	ETOH
FBgn0004591	Eig71Ed	3L:15645637-15646196	+	Known	RARE	3.01841e-07	0.991438	1	0.547078	0.930305	0.457131	0.57605	0.144464	0.00851616	0.0231717	0.999999	1	ETOH
FBgn0004592	Eig71Ee	3L:15647572-15649110	-	Known	RARE	0.00777444	0.0844273	0.341877	0.787893	0.971306	0.000516626	0.00183269	0.00738944	0.861058	1	0.999999	1	NONE
FBgn0004594	Eig71Eg	3L:15650728-15651258	+	Known	YES	0.000867256	0.56507	0.891744	0.779321	0.970529	0.410889	0.5316	0	1	1	1	1	NONE
FBgn0004595	pros	3R:7154202-7233349	+	Known	YES	0.00538222	0.151323	0.480254	0.0267828	0.659914	0	0	0.36303	0.00474477	0.013716	0.0141709	0.222003	BOTH
FBgn0004597	CycC	3R:10714726-10715927	-	Known	YES	1.7022e-06	0.97967	1	0.0228341	0.655419	0	0	0.211128	0.000198534	0.000794018	1	1	BASELINE
FBgn0004598	Fur2	X:16267119-16275815	+	Known	YES	0.000310226	0.73081	0.987085	0.324299	0.854564	0	0	0.383272	9.50854e-06	4.9204e-05	0.168671	0.807862	BASELINE
FBgn0004606	zfh1	3R:26591648-26614924	+	Known	YES	0.00943467	0.0572118	0.268972	0.67461	0.953166	0.300372	0.420749	0.26913	3.2785e-05	0.000154055	0.877615	1	BOTH
FBgn0004607	zfh2	4:522436-561500	+	Known	YES	0.0021558	0.364209	0.739598	0.089111	0.711416	1.83608e-10	1.18047e-09	0.354331	0.0128542	0.0335215	0.00939468	0.175866	BASELINE
FBgn0004611	Plc21C	2L:305935-355566	+	Known	YES	0.00186262	0.399028	0.768162	0.613411	0.943214	6.11486e-06	2.75947e-05	0.286654	0.00419233	0.0122767	0.153432	0.773087	BASELINE
FBgn0004618	gl	3R:14193649-14198460	-	Known	YES	0.00678945	0.10693	0.393953	0.881683	0.985514	4.46854e-05	0.000183786	0.124006	0.0292717	0.0694841	1	1	BASELINE
FBgn0004619	GluRIA	3L:6617132-6628159	+	Known	YES	0.0443588	3.17547e-05	0.000743983	0.0306195	0.664932	3.74257e-06	1.72302e-05	0.17372	0.00346539	0.0103459	0.986406	1	BASELINE
FBgn0004620	GluRIIA	2L:5555072-5558994	+	Known	YES	0.0180074	0.00846455	0.0726366	0.498932	0.915064	1.61979e-06	7.73347e-06	0.274281	4.38625e-06	2.41712e-05	1	1	BASELINE
FBgn0004622	TkR99D	3R:25776518-25795169	-	Known	YES	0.00766324	0.08669	0.346791	0.0556718	0.683125	0.108213	0.190727	0.230603	0.000178549	0.000722537	0.975713	1	BASELINE
FBgn0004623	Gbeta76C	3L:19680737-19683092	+	Known	YES	0.00157519	0.438041	0.800381	0.778181	0.970222	1.49261e-07	7.8093e-07	0.85952	4.30924e-31	3.7624e-29	0.0018472	0.0612931	BOTH
FBgn0004629	Cys	3R:10394825-10395366	-	Known	YES	0.0318434	0.000441945	0.00689337	0.225829	0.810415	0.0402638	0.0859279	0.790472	2.18065e-23	9.00377e-22	0.00342249	0.0903944	BOTH
FBgn0004635	rho	3L:1463811-1468944	+	Known	YES	0.000114417	0.834502	1	0.321125	0.854197	3.29146e-07	1.67096e-06	0.529937	1.59977e-05	7.96842e-05	0.000253613	0.0142427	BOTH
FBgn0004636	Rap1	3L:1859115-1862239	-	Known	YES	0.0338755	0.000287899	0.00486267	0.085294	0.707252	5.10703e-15	4.86685e-14	0.517857	6.50747e-06	3.46917e-05	0.00102371	0.0399652	BOTH
FBgn0004638	drk	2R:9382727-9390346	-	Known	YES	0.0414546	5.84519e-05	0.001256	0.690559	0.954829	0	0	0.169604	0.00102809	0.0034824	0.999999	1	BASELINE
FBgn0004643	Zw10	X:2498230-2500857	+	Known	YES	0.00872351	0.0675068	0.298072	0.0472969	0.679301	7.92699e-14	6.74146e-13	0.320363	0.000502027	0.00182435	0.173325	0.819847	BASELINE
FBgn0004644	hh	3R:18953891-18967628	-	Known	YES	0.00641223	0.117215	0.41555	0.88299	0.985514	0.290255	0.409924	0.43631	6.30039e-07	3.96161e-06	0.108102	0.657632	BOTH
FBgn0004646	ogre	X:6867653-6885351	-	Known	YES	0.00133238	0.475727	0.830712	0.97987	0.997334	0.0728184	0.139255	0.387089	1.30691e-07	9.13233e-07	0.518645	1	BOTH
FBgn0004647	N	X:3028903-3066254	+	Known	YES	3.81022e-05	0.904034	1	0.719106	0.960808	0.00153274	0.00496822	0.191098	0.000105618	0.000449144	0.999999	1	NONE
FBgn0004648	svr	X:390479-403105	+	Known	YES	0.0374581	0.000135417	0.00255926	0.280662	0.836147	1.22202e-11	8.58644e-11	0.461293	8.02314e-07	4.96662e-06	0.0439622	0.419204	BOTH
FBgn0004649	yl	X:14087247-14093991	+	Known	YES	0.00364565	0.237839	0.605111	0.395712	0.881742	2.89525e-07	1.47788e-06	0.327831	1.65768e-05	8.23609e-05	0.450657	1	BOTH
FBgn0004650	fs(1)N	X:1216546-1223471	+	Known	YES	0.000571869	0.640391	0.936754	0.945985	0.992718	0	0	0.372706	5.95255e-07	3.7584e-06	0.471111	1	BOTH
FBgn0004652	fru	3R:14239995-14371308	-	Known	YES	0.00425933	0.201923	0.558848	0.315108	0.851131	1.803e-13	1.47894e-12	0.318013	0.000441198	0.00162568	0.192585	0.857468	BOTH
FBgn0004654	Pgd	X:2039169-2042599	+	Known	YES	0.116162	6.71503e-12	6.93358e-10	0.247672	0.820337	0.00763808	0.020862	0.204085	0.000231548	0.000910415	1	1	BASELINE
FBgn0004655	wapl	X:2043969-2053016	-	Known	YES	0.000179411	0.793605	1	0.0351101	0.666368	3.67706e-13	2.93849e-12	0.242351	5.60492e-05	0.000251561	1	1	ETOH
FBgn0004656	fs(1)h	X:7931841-7955469	-	Known	YES	0.000674365	0.611942	0.919489	0.561668	0.934151	1.05693e-13	8.88491e-13	0.24186	9.5428e-05	0.000410023	0.970597	1	BASELINE
FBgn0004657	mys	X:7955678-7964270	+	Known	YES	9.73721e-05	0.847161	1	0.41036	0.885071	0.0937778	0.170307	0.272783	0.000426424	0.00157887	0.467606	1	BOTH
FBgn0004666	sim	3R:8883477-8903846	+	Known	YES	0.00127646	0.485142	0.836695	0.715573	0.960228	6.04776e-10	3.75921e-09	0.226139	0.0309019	0.0729047	0.225208	0.920836	BASELINE
FBgn0004687	Mlc-c	X:5513169-5516572	-	Known	YES	0.0363684	0.000170311	0.00313392	0.577284	0.937052	0	0	0.309693	0.133953	0.258678	0.00626193	0.134757	BOTH
FBgn0004698	Xpc	2R:11199015-11205744	+	Known	YES	0.0109478	0.0404326	0.214964	0.313336	0.850036	0	0	0.290652	8.94162e-06	4.64856e-05	0.866099	1	BASELINE
FBgn0004777	Ccp84Ag	3R:2512450-2513761	+	Known	YES	0.000129206	0.824294	1	0.84908	0.981698	0.983646	0.989491	0.171514	0.000791648	0.00275042	1	1	NONE
FBgn0004778	Ccp84Af	3R:2515324-2515961	-	Known	RARE	0.000403427	0.6948	0.969103	0.254686	0.823959	0.0964544	0.174329	0.0733846	0.385329	0.613683	0.761429	1	NONE
FBgn0004779	Ccp84Ae	3R:2516609-2517480	-	Known	YES	0.000219838	0.77211	1	0.702679	0.958147	0.848514	0.894977	0.201429	0.0056497	0.016051	0.644496	1	NONE
FBgn0004780	Ccp84Ad	3R:2518454-2519239	+	Known	RARE	0.000371993	0.706358	0.974695	0.0751942	0.697166	0.433192	0.552952	0.227323	0.0344237	0.0801959	0.208127	0.888107	NONE
FBgn0004781	Ccp84Ac	3R:2520870-2521993	-	Known	RARE	0.0114546	0.0360409	0.199825	0.808281	0.974124	0.982962	0.989159	0.188661	0.0310491	0.0731953	0.444516	1	ETOH
FBgn0004782	Ccp84Ab	3R:2527690-2528599	-	Known	RARE	0.0103171	0.0466933	0.235943	0.737503	0.963859	0.710372	0.790815	0.119982	0.0136162	0.035249	0.999999	1	NONE
FBgn0004783	Ccp84Aa	3R:2529806-2530625	+	Known	RARE	0.00288051	0.294156	0.670398	0.644435	0.947899	0.88616	0.921861	0.0987874	0.108783	0.2163	0.913165	1	NONE
FBgn0004784	inaC	2R:12786040-12789080	+	Known	YES	0.0184763	0.00764556	0.0674205	0.716387	0.960381	4.59016e-05	0.00018858	0.570037	5.25371e-06	2.8511e-05	3.78989e-05	0.00289439	BOTH
FBgn0004795	retn	2R:19520133-19542343	+	Known	YES	0.00105425	0.525848	0.866125	0.189247	0.785697	9.06342e-12	6.44262e-11	0.360629	2.91668e-05	0.00013847	0.196139	0.86469	BASELINE
FBgn0004797	mdy	2L:16816660-16826964	+	Known	YES	0.0267032	0.00131185	0.0170079	0.691292	0.955173	0	0	0.293589	0.000370235	0.00138971	0.339706	1	BASELINE
FBgn0004811	fs(2)ltoPP43	2L:19792773-19795851	-	Known	YES	0.000245408	0.759606	1	0.0230711	0.655419	0	0	0.326267	4.99283e-05	0.000226454	0.34113	1	BASELINE
FBgn0004828	His3.3B	X:9046556-9050702	-	Known	YES	0.00769401	0.0860573	0.345331	0.057807	0.683125	0	0	0.214392	0.000262482	0.0010202	1	1	BASELINE
FBgn0004832	Xpac	X:3996988-3998230	-	Known	YES	0.0810556	1.35669e-08	7.21997e-07	0.110815	0.725088	2.90532e-09	1.71979e-08	0.226881	0.00307833	0.00931556	0.537169	1	BASELINE
FBgn0004837	Su(H)	2L:15039488-15043334	+	Known	YES	0.0155743	0.0144006	0.10644	0.278024	0.834504	1.55431e-14	1.41715e-13	0.359528	0.000328291	0.00124749	0.0748665	0.547567	BASELINE
FBgn0004838	Hrb27C	2L:6920704-6932057	+	Known	YES	0.000540768	0.649636	0.941778	0.541421	0.928894	0	0	0.128663	0.999999	1	0.0995522	0.63173	BASELINE
FBgn0004839	otk	2R:7888978-7907351	-	Known	YES	0.000837225	0.571887	0.896175	0.189221	0.785697	0.000208579	0.000788131	0.364307	0.00145679	0.00476971	0.0290761	0.333049	BOTH
FBgn0004841	TkR86C	3R:6563314-6576950	-	Known	YES	0.00469342	0.180348	0.528102	0.51498	0.920575	0.266818	0.384532	0.0790751	1	1	0.336604	1	NONE
FBgn0004842	RYa-R	3R:22822702-22883657	+	Known	YES	0.000811798	0.577786	0.899524	0.22397	0.80891	0.860429	0.903253	0.0274313	0.521047	0.776269	1	1	NONE
FBgn0004852	Ac76E	3L:19932387-19971060	+	Known	YES	0.000913687	0.554832	0.884876	0.655493	0.950857	2.22045e-16	2.42491e-15	0.548842	7.45021e-15	1.24332e-13	0.682677	1	BOTH
FBgn0004854	B-H2	X:17208614-17218208	+	Known	YES	0.00183953	0.401969	0.770338	0.319748	0.853946	0	0	0.0534605	0.262702	0.451951	1	1	NONE
FBgn0004855	RpII15	3R:10134811-10135900	+	Known	YES	0.000686701	0.608704	0.917255	0.0258742	0.655419	0	0	0.268631	9.45512e-05	0.000406413	0.719511	1	BASELINE
FBgn0004856	Bx42	X:8997903-9000637	-	Known	YES	0.12962	3.3993e-13	4.26847e-11	0.136002	0.749788	2.22045e-16	2.42491e-15	0.258696	2.87873e-06	1.63613e-05	1	1	BASELINE
FBgn0004858	elB	2L:14390628-14409549	-	Known	YES	0.00271961	0.308067	0.684962	0.0850826	0.706508	3.90231e-06	1.79263e-05	0.296006	0.000381708	0.00142909	0.321325	1	BOTH
FBgn0004859	ci	4:68336-77667	-	Known	YES	0.0116011	0.0348668	0.195698	0.0359327	0.667923	0.00298259	0.00904819	0.519052	2.23176e-05	0.000108535	0.000388162	0.0193085	BOTH
FBgn0004860	ph-d	X:2009760-2017319	-	Known	YES	0.0129043	0.0260147	0.160334	0.717255	0.960381	2.01795e-08	1.12087e-07	0.301365	0.00277087	0.00845226	0.130417	0.718925	BOTH
FBgn0004861	ph-p	X:2020243-2032404	-	Known	YES	0.00927883	0.059316	0.275213	0.30339	0.845395	8.77442e-10	5.40495e-09	0.204603	0.00609497	0.0171936	0.604452	1	BASELINE
FBgn0004862	bap	3R:17214602-17216171	+	Known	YES	0.0364805	0.000166342	0.003071	0.957746	0.994459	0.0455195	0.0950254	0.0529733	0.59753	0.861022	0.776358	1	NONE
FBgn0004863	C15	3R:17325708-17338536	+	Known	YES	0.00255198	0.32348	0.700058	0.314637	0.850706	0.0895321	0.16429	0.0918443	0.183789	0.337066	0.830245	1	NONE
FBgn0004864	hop	X:11254963-11262131	-	Known	YES	0.00312613	0.274426	0.649944	0.914153	0.990103	0.349468	0.470411	0.276275	0.000338313	0.00128198	0.471812	1	BASELINE
FBgn0004865	Eip78C	3L:21219709-21259603	+	Known	YES	0.00266536	0.312948	0.68946	0.200763	0.792617	1.03002e-09	6.30887e-09	0.447858	7.68796e-05	0.000335836	0.00681211	0.142587	BOTH
FBgn0004867	RpS2	2L:9896265-9897552	-	Known	YES	0.0232997	0.00270857	0.0303105	0.484316	0.910832	0.360739	0.481733	0.211168	0.000183518	0.000740499	0.999999	1	ETOH
FBgn0004868	Gdi	2L:9491176-9494876	-	Known	YES	0.00433635	0.197885	0.552906	0.138996	0.750405	1.00586e-13	8.4726e-13	0.238027	0.0671957	0.14334	0.110782	0.664314	BASELINE
FBgn0004870	bab1	3L:1036369-1101089	-	Known	YES	0.0103909	0.045911	0.233256	0.992859	0.998729	0.00468576	0.0135726	0.298067	0.000142573	0.000588674	0.418817	1	BOTH
FBgn0004872	piwi	2L:10982205-10987420	-	Known	YES	0.016963	0.0106253	0.0855305	0.498028	0.914748	0	0	0.388077	7.18089e-09	5.89649e-08	0.865946	1	BOTH
FBgn0004875	enc	3L:3818679-3842326	+	Known	YES	0.00206473	0.374552	0.7487	0.349364	0.865735	0.00381639	0.0113065	0.35577	0.000339741	0.00128692	0.0820807	0.57153	BOTH
FBgn0004876	cdi	3R:14870604-14919992	-	Known	YES	0.000448888	0.678969	0.958636	0.0431874	0.672871	3.4155e-08	1.8708e-07	0.406454	4.51536e-06	2.48134e-05	0.120746	0.693791	BASELINE
FBgn0004878	cas	3R:1538697-1542527	-	Known	YES	5.23378e-05	0.887628	1	0.781449	0.970529	0.652998	0.745128	0.274408	0.314363	0.522566	0.00885292	0.16922	ETOH
FBgn0004880	scrt	3L:3983896-3994003	+	Known	YES	0.00185825	0.399582	0.76865	0.213717	0.803082	8.214e-08	4.38726e-07	0.211708	0.277943	0.473048	0.0739674	0.543765	BASELINE
FBgn0004882	orb	3R:19086332-19106578	-	Known	YES	0.00742914	0.0916698	0.358776	0.0641637	0.686739	0	0	0.541482	4.35374e-08	3.26331e-07	0.00600858	0.13158	BOTH
FBgn0004885	tok	3R:20545419-20574847	+	Known	YES	0.00261469	0.317598	0.69396	0.261891	0.827972	0.0303635	0.0678302	0.65399	2.39673e-16	4.75416e-15	0.0697466	0.527466	BOTH
FBgn0004888	Scsalpha	3L:3814211-3818383	+	Known	YES	0.000820469	0.575761	0.898073	0.848528	0.981571	1.52078e-06	7.27525e-06	0.329342	6.23333e-07	3.92165e-06	0.867852	1	BOTH
FBgn0004889	tws	3R:5951851-5965494	-	Known	YES	8.50605e-05	0.857039	1	0.129426	0.744469	2.22045e-16	2.42491e-15	0.29917	0.148728	0.282563	0.00839504	0.16326	BASELINE
FBgn0004892	sob	2L:3578013-3580769	-	Known	YES	0.000372261	0.706257	0.974695	0.727742	0.962397	0.000437675	0.00157225	0.230962	0.00136599	0.00449922	0.633977	1	BASELINE
FBgn0004893	bowl	2L:3771700-3784121	+	Known	YES	0.0195177	0.00610295	0.0570749	0.0906027	0.713664	9.2587e-12	6.57307e-11	0.561373	1.29744e-12	1.6834e-11	0.166481	0.803223	BOTH
FBgn0004895	FoxL1	3L:4018878-4021279	+	Known	YES	4.66771e-05	0.893841	1	0.87272	0.984336	0.836527	0.886322	0.0665313	1	1	0.357872	1	NONE
FBgn0004896	fd59A	2R:18755682-18758229	+	Known	YES	0.00506099	0.164139	0.501947	0.588494	0.940047	0.129935	0.220434	2.2231e-13	1	1	1	1	NONE
FBgn0004897	fd96Ca	3R:20908406-20910600	+	Known	RARE	0.00422884	0.203549	0.5608	0.159224	0.76527	0.565188	0.672734	0.0676151	0.95923	1	0.459946	1	NONE
FBgn0004898	fd96Cb	3R:20920734-20921821	+	Known	YES	4.69747e-05	0.893505	1	0.540951	0.928627	0.243214	0.358357	0.238177	1	1	0.00207771	0.0654746	ETOH
FBgn0004901	Prat	3R:3735320-3737501	-	Known	YES	4.86002e-05	0.891689	1	0.380298	0.876002	7.77156e-16	8.07163e-15	0.387218	1.0227e-05	5.26132e-05	0.14871	0.761772	BOTH
FBgn0004903	Rb97D	3R:22697851-22701464	-	Known	YES	0.0014471	0.45731	0.816499	0.334458	0.859567	0	0	0.249883	0.00013551	0.000562076	0.837711	1	BASELINE
FBgn0004907	14-3-3zeta	2R:5987182-5997192	+	Known	YES	0.0112623	0.0376462	0.20533	0.520766	0.922272	5.55112e-15	5.26908e-14	0.0793746	0.141933	0.271811	0.999999	1	NONE
FBgn0004908	Arl2	3R:4166822-4167594	+	Known	YES	0.0254319	0.00171893	0.0209414	0.00498821	0.608945	0	0	0.129443	0.00814983	0.0222816	1	1	BASELINE
FBgn0004910	Eip63F-1	3L:3909973-3935617	-	Known	YES	0.00713746	0.0983124	0.374729	0.220292	0.807889	0.437979	0.557555	0.383226	0.000109868	0.000465271	0.0619154	0.496493	BOTH
FBgn0004911	asRNA:Eig63F-2	3L:3934718-3935992	+	Known	YES	0.0230333	0.00286733	0.0316957	0.791644	0.971487	0.957729	0.971827	0.244432	0.00123579	0.00410993	0.537942	1	ETOH
FBgn0004913	Gnf1	3R:732344-735803	+	Known	YES	0.0004453	0.680183	0.959472	0.089566	0.711719	0	0	0.316045	0.000348877	0.00131691	0.220004	0.909851	BASELINE
FBgn0004914	Hnf4	2L:8687226-8709611	-	Known	YES	0.0344493	0.000255112	0.00437949	0.308299	0.847953	0.000560829	0.00197673	0.429581	3.3094e-09	2.84353e-08	0.54329	1	BOTH
FBgn0004915	TfIIB	2L:10431338-10433116	+	Known	YES	0.0591472	1.41535e-06	4.72164e-05	0.0986061	0.717673	0	0	0.350625	1.52944e-05	7.64423e-05	0.30118	1	BASELINE
FBgn0004919	gol	2R:20960150-20971870	-	Known	YES	0.00728895	0.0947996	0.366	0.0171032	0.643733	0.847679	0.894434	0.521765	6.60347e-05	0.000292425	0.000136019	0.00836751	BOTH
FBgn0004921	Ggamma1	2R:4788909-4792296	+	Known	YES	0.00849806	0.0711682	0.308316	0.527767	0.9245	0.977481	0.985188	0.373392	0.0117239	0.0308408	0.00465073	0.110194	BOTH
FBgn0004924	Top1	X:15213512-15222062	+	Known	YES	0.00516294	0.159943	0.49486	0.0324877	0.664932	0	0	0.373269	0.000930537	0.00317797	0.0278536	0.326863	BASELINE
FBgn0004926	eIF2beta	3L:12518193-12519831	-	Known	YES	0.000130025	0.823747	1	0.485495	0.911415	0	0	0.183816	0.00051618	0.00187173	1	1	BASELINE
FBgn0004956	upd1	X:18199387-18203324	-	Known	YES	0.00899	0.0634358	0.287407	0.109505	0.723886	0.310924	0.431885	0.268681	0.953307	1	0.0016331	0.0563302	ETOH
FBgn0004957	por	X:18271554-18273887	-	Known	YES	0.000924743	0.552446	0.883003	0.0482791	0.679301	3.27218e-06	1.51437e-05	0.248267	7.65024e-05	0.000334363	0.944792	1	BASELINE
FBgn0004959	phm	X:18579799-18582466	+	Known	YES	0.00275521	0.304917	0.682126	0.0546489	0.683125	0.431226	0.55101	0.28667	4.71311e-06	2.57776e-05	0.999999	1	BASELINE
FBgn0005198	gig	3L:20122281-20132110	+	Known	YES	0.0264493	0.00138452	0.0177239	0.846042	0.981157	0.00256684	0.00790139	0.14792	0.0581651	0.126613	0.63584	1	NONE
FBgn0005278	Sam-S	2L:106903-114432	+	Known	YES	0.0120526	0.0314908	0.182471	0.559248	0.933476	0	0	0.422668	1.83416e-10	1.85167e-09	0.961197	1	BOTH
FBgn0005322	nmd	2L:10302173-10303947	-	Known	YES	7.50022e-05	0.865672	1	0.0580526	0.683125	0	0	0.239504	3.9831e-05	0.000184246	1	1	BASELINE
FBgn0005355	Su(fu)	3R:8515595-8517190	-	Known	YES	0.000225674	0.769189	1	0.0375474	0.669831	0.00056314	0.00198404	0.23066	6.03598e-05	0.000268928	1	1	BASELINE
FBgn0005386	ash1	3L:19583873-19591855	-	Known	YES	0.00740711	0.0921542	0.359848	0.224995	0.81033	2.33147e-15	2.30642e-14	0.330795	0.00120347	0.00401042	0.0902203	0.601355	BOTH
FBgn0005390	fs(1)M3	X:5852240-5858280	-	Known	YES	0.0186689	0.00733308	0.0653873	0.73706	0.963859	0	0	0.482436	3.34668e-08	2.54662e-07	0.0774203	0.557112	BOTH
FBgn0005391	Yp2	X:9944984-9946669	-	Known	YES	0.0323849	0.000394222	0.00628189	0.258391	0.825964	0.000104075	0.000409652	0.373647	0.00182746	0.00583302	0.0181527	0.256363	BASELINE
FBgn0005411	U2af50	X:16250729-16253072	-	Known	YES	0.0218178	0.00372	0.0389751	0.206923	0.798161	0	0	0.167618	0.00082618	0.0028559	1	1	BASELINE
FBgn0005427	ewg	X:162542-173751	-	Known	YES	0.0803916	1.56345e-08	8.16474e-07	0.0187927	0.645654	0	0	0.460665	3.49016e-07	2.28753e-06	0.0637654	0.504331	BOTH
FBgn0005533	RpS17	3L:9421895-9422921	-	Known	YES	0.00234099	0.344359	0.720573	0.119912	0.735913	0.808078	0.865529	0.116466	0.00928455	0.025059	1	1	NONE
FBgn0005536	Mbs	3L:16045059-16075126	+	Known	YES	2.89674e-05	0.916277	1	0.914523	0.990196	0.290398	0.410062	0.29082	0.000278016	0.0010746	0.390663	1	BOTH
FBgn0005558	ey	4:718315-741799	+	Known	YES	0.0174099	0.00963911	0.0798938	0.227977	0.811912	5.83443e-09	3.38726e-08	0.357	3.38543e-05	0.000158591	0.202558	0.879093	BASELINE
FBgn0005561	sv	4:1109424-1133943	+	Known	YES	0.00722995	0.0961513	0.36939	0.327	0.856102	2.72526e-05	0.000115226	0.186503	0.391296	0.621222	0.102677	0.641293	BASELINE
FBgn0005564	Shal	3L:19559951-19577668	-	Known	YES	0.0257203	0.00161661	0.0199411	0.334275	0.859567	5.10083e-08	2.76053e-07	0.373252	0.000604289	0.00216045	0.0356453	0.373452	BASELINE
FBgn0005585	Calr	3R:5454413-5456573	-	Known	YES	0.000126263	0.826274	1	0.207373	0.798852	2.77556e-15	2.72164e-14	0.195661	0.000306979	0.00117489	0.999999	1	BASELINE
FBgn0005586	Rab3	2R:6608840-6616708	-	Known	YES	0.042804	4.40211e-05	0.000985244	0.267877	0.829729	1.29217e-05	5.65604e-05	0.20527	0.00947498	0.0255153	0.523334	1	BASELINE
FBgn0005590	scw	2L:19699379-19700968	-	Known	YES	0.000483124	0.667656	0.952052	0.199589	0.790675	0.0560145	0.112588	0.300091	1	1	5.63545e-05	0.00404582	ETOH
FBgn0005592	btl	3L:14068872-14076329	+	Known	YES	0.0117686	0.0335724	0.190878	0.433663	0.892706	0.000385614	0.00139842	0.496647	4.89344e-08	3.64826e-07	0.0404396	0.400893	BOTH
FBgn0005593	RpL7	2L:10201004-10202321	+	Known	YES	0.000473468	0.670797	0.953963	0.892217	0.98621	0.590138	0.6941	0.100735	0.0232813	0.0567963	1	1	NONE
FBgn0005596	yem	3R:24944052-24948601	-	Known	YES	0.00351465	0.24647	0.615833	0.0615703	0.685423	2.22045e-16	2.42491e-15	0.404448	1.44295e-05	7.25629e-05	0.0804895	0.565501	BOTH
FBgn0005612	Sox14	2R:19866324-19872700	+	Known	YES	0.00363767	0.238354	0.605723	0.443457	0.896098	0.10307	0.183632	0.49046	1.67309e-12	2.14837e-11	0.765467	1	BOTH
FBgn0005613	Sox15	2R:10088895-10099918	-	Known	YES	0.0046672	0.181572	0.529953	0.378433	0.875148	0.0929519	0.169144	0.15937	0.944916	1	0.0717799	0.535387	NONE
FBgn0005614	trpl	2R:5641202-5653023	+	Known	YES	0.0259058	0.00155408	0.0194055	0.429455	0.892006	0.00674073	0.018716	0.818214	5.19634e-21	1.67035e-19	3.79093e-06	0.000418819	BOTH
FBgn0005616	msl-2	2L:3462218-3466112	-	Known	YES	0.000981111	0.540573	0.875011	0.418848	0.88877	0.376148	0.496787	0.372968	7.14764e-10	6.7107e-09	1	1	BASELINE
FBgn0005617	msl-1	2L:18683720-18688800	-	Known	YES	0.00111215	0.514689	0.858592	0.247443	0.820144	0	0	0.288639	0.00262539	0.00806131	0.180774	0.83424	BASELINE
FBgn0005619	Hdc	2R:6125493-6133582	+	Known	YES	0.00445398	0.191897	0.545094	0.733609	0.963582	2.42029e-14	2.17592e-13	0.396043	8.98042e-06	4.66656e-05	0.123666	0.70148	BOTH
FBgn0005624	Psc	2R:8853502-8868499	-	Known	YES	0.00388325	0.223096	0.586462	0.158882	0.764901	1.65104e-05	7.14477e-05	0.406176	8.72254e-10	8.09413e-09	0.943917	1	BOTH
FBgn0005626	ple	3L:6706456-6712625	-	Known	YES	0.000825482	0.574597	0.897558	0.707311	0.958684	6.89368e-08	3.69618e-07	0.180297	0.00808067	0.0221069	0.762426	1	ETOH
FBgn0005630	lola	2R:6369399-6430796	-	Known	YES	0.00614315	0.125215	0.431548	0.313972	0.850577	4.44089e-16	4.71912e-15	0.359457	0.00193161	0.00612629	0.0289513	0.332411	BASELINE
FBgn0005631	robo1	2R:18580029-18588475	-	Known	YES	0.0010161	0.533437	0.870988	0.0191385	0.647724	6.77593e-07	3.34811e-06	0.422528	4.42379e-06	2.43621e-05	0.0762594	0.552351	BOTH
FBgn0005632	faf	3R:27602742-27616403	+	Known	YES	0.000536331	0.650981	0.942054	0.539387	0.928074	2.37404e-08	1.31257e-07	0.182185	0.110927	0.219958	0.277393	1	NONE
FBgn0005633	fln	3L:19982651-19984320	-	Known	YES	0.00114134	0.509219	0.855041	0.580699	0.938062	6.3445e-09	3.67004e-08	0.310215	2.57811e-08	1.98887e-07	0.999999	1	BASELINE
FBgn0005636	nvy	2R:20163257-20178607	+	Known	YES	0.00242048	0.336288	0.712417	0.970793	0.996328	2.48526e-11	1.70374e-10	0.21298	0.0022464	0.00702107	0.706772	1	BASELINE
FBgn0005638	slbo	2R:20219045-20221830	-	Known	YES	0.00119379	0.499639	0.847591	0.706281	0.958601	8.28864e-06	3.69074e-05	0.0740112	0.12715	0.247358	0.999999	1	BASELINE
FBgn0005640	Eip63E	3L:3515751-3610521	+	Known	YES	0.00186436	0.398808	0.767953	0.742342	0.964579	5.23851e-09	3.05186e-08	0.181575	0.00180488	0.0057702	1	1	BASELINE
FBgn0005642	wdn	3R:24633705-24637059	-	Known	YES	0.0204181	0.00502575	0.0492013	0.154808	0.761659	1.64835e-08	9.24619e-08	0.346106	1.38494e-05	6.98028e-05	0.33927	1	BASELINE
FBgn0005648	Pabp2	2R:4018936-4021879	+	Known	YES	0.000584431	0.636744	0.935139	0.00900924	0.640933	0	0	0.267201	0.00252084	0.00777375	0.288662	1	BASELINE
FBgn0005649	Rox8	3R:19868778-19873987	-	Known	YES	2.03289e-05	0.929825	1	0.062586	0.685568	0	0	0.410994	0.0015651	0.00508806	0.00446376	0.106745	BOTH
FBgn0005655	PCNA	2R:16149259-16150388	-	Known	YES	0.000161606	0.803895	1	0.0708791	0.692117	0	0	0.483772	3.41472e-06	1.91736e-05	0.00869229	0.167198	BOTH
FBgn0005658	Ets65A	3L:6090717-6117013	+	Known	YES	0.00146102	0.455153	0.815036	0.260339	0.827065	1.4242e-08	8.02512e-08	0.170331	0.106102	0.212047	0.352084	1	BASELINE
FBgn0005659	Ets98B	3R:23562260-23574088	+	Known	YES	0.0112133	0.0380669	0.206918	0.0855553	0.707386	1.77192e-13	1.45451e-12	0.396583	5.68594e-07	3.60154e-06	0.301349	1	BOTH
FBgn0005660	Ets21C	2L:544925-552923	-	Known	YES	0.000834574	0.572497	0.896501	0.886881	0.985863	4.17876e-05	0.000172588	0.199384	0.00177073	0.00567023	0.872876	1	BASELINE
FBgn0005664	Crys	2L:11944129-11947131	+	Known	YES	0.0827011	9.54324e-09	5.2366e-07	0.0889124	0.711416	0.211405	0.321964	0.80869	1.14369e-15	2.11148e-14	1.23523e-09	3.73096e-07	BOTH
FBgn0005666	bt	4:745026-797100	+	Known	YES	0.0115065	0.0356206	0.198315	0.103329	0.72173	1.73982e-08	9.73812e-08	0.321377	0.00030648	0.00117325	0.205203	0.882597	BOTH
FBgn0005670	Cyp4d1	X:2053178-2056213	-	Known	YES	0.137435	5.90159e-14	8.81842e-12	0.203195	0.795494	0.534076	0.64556	0.902192	1.99363e-32	1.99523e-30	6.17324e-07	9.03801e-05	BOTH
FBgn0005671	Vha55	3R:8449484-8453551	-	Known	YES	0.00372231	0.232957	0.598548	0.804564	0.974057	2.53249e-07	1.29903e-06	0.16668	0.179464	0.33047	0.282658	1	NONE
FBgn0005672	spi	2L:19567900-19577315	-	Known	YES	0.00502459	0.165668	0.504298	0.506669	0.917463	1.44262e-08	8.12617e-08	0.458156	3.52709e-11	3.88606e-10	0.77161	1	BOTH
FBgn0005674	GluProRS	3R:19777858-19784113	-	Known	YES	0.0144337	0.0185167	0.12745	0.593948	0.940567	4.79983e-12	3.48281e-11	0.266433	0.0214047	0.0527713	0.108848	0.659144	BOTH
FBgn0005677	dac	2L:16466512-16485998	-	Known	YES	0.00107111	0.522554	0.864102	0.412962	0.885813	0	0	0.282082	0.0274881	0.0658046	0.0613019	0.49358	BASELINE
FBgn0005683	pie	2L:10420625-10422780	-	Known	YES	0.015181	0.0157018	0.113249	0.056134	0.683125	0	0	0.361982	0.000219439	0.000868177	0.0841851	0.57992	BASELINE
FBgn0005694	Aef1	3L:21426522-21431739	+	Known	YES	0.00412776	0.209049	0.568663	0.0411115	0.672606	0	0	0.315113	0.0267263	0.0641596	0.0222543	0.288634	BASELINE
FBgn0005695	gcl	2R:4611763-4616504	+	Known	YES	0.00435272	0.197039	0.551488	0.19539	0.788904	0	0	0.370146	6.68311e-06	3.55658e-05	0.257382	0.971959	BOTH
FBgn0005696	DNApol-alpha73	3R:23064885-23066950	+	Known	YES	0.0301695	0.000629417	0.00927989	0.0233699	0.655419	1.84297e-14	1.67169e-13	0.266519	0.00115119	0.00385074	0.384364	1	BASELINE
FBgn0005771	noc	2L:14490859-14494019	+	Known	YES	0.000610261	0.629392	0.930546	0.0319149	0.664932	1.28129e-06	6.17986e-06	0.415693	0.000603609	0.0021584	0.00716639	0.147494	BOTH
FBgn0005775	Con	3L:4936758-5079033	-	Known	YES	1.38619e-05	0.942028	1	0.0469215	0.679301	1.22939e-11	8.63281e-11	0.217709	0.00751347	0.0206937	0.467024	1	BASELINE
FBgn0005777	PpD3	3R:5573597-5576816	+	Known	YES	6.339e-05	0.876417	1	0.0643178	0.686739	0	0	0.26986	0.00939794	0.0253304	0.154843	0.777391	BASELINE
FBgn0005778	PpD5	2R:17929172-17930450	-	Known	YES	0.000661119	0.61546	0.921925	0.31152	0.848781	0.886882	0.922364	0	1	1	1	1	NONE
FBgn0005779	PpD6	2L:3109672-3110998	+	Known	YES	0.0153804	0.0150277	0.109816	0.419383	0.888815	0.0043287	0.0126553	0	1	1	1	1	NONE
FBgn0008635	betaCOP	X:18275582-18279275	-	Known	YES	0.00609796	0.126617	0.433926	0.259095	0.826042	0.177062	0.280936	0.0152727	0.718885	0.987591	1	1	NONE
FBgn0008636	hbn	2R:16842173-16848414	-	Known	YES	0.000156227	0.807121	1	0.366523	0.871666	0.205107	0.314804	0.074458	1	1	0.303348	1	NONE
FBgn0008646	E5	3R:9693067-9702894	-	Known	YES	0.013296	0.0238371	0.151089	0.0279534	0.660983	1.17326e-07	6.18676e-07	0.0033752	0.936115	1	1	1	NONE
FBgn0008651	lbl	3R:17235701-17259855	-	Known	YES	0.000164924	0.801933	1	0.30517	0.847168	0.0196578	0.0470407	0.178917	0.00458505	0.0133013	0.884597	1	NONE
FBgn0010014	CanB	X:5226532-5228482	+	Known	YES	0.00555555	0.144879	0.46875	0.848974	0.981698	0.00715497	0.0197095	0.242263	7.28486e-05	0.00031956	0.999999	1	BASELINE
FBgn0010015	CanA1	3R:26865096-26872543	+	Known	YES	0.00220066	0.35926	0.734786	0.182784	0.780318	4.16516e-10	2.61765e-09	0.429911	4.05784e-06	2.25132e-05	0.0627099	0.500232	BOTH
FBgn0010019	Cyp4g1	X:361090-363368	-	Known	YES	0.0406051	6.98749e-05	0.00146053	0.414327	0.886352	0.999152	0.999648	0.605354	3.48636e-12	4.30365e-11	0.0207909	0.27779	BOTH
FBgn0010038	GstD2	3R:8197693-8198426	+	Known	YES	0.0091053	0.0617559	0.282584	0.489056	0.912112	0.030366	0.0678302	0.825399	9.37304e-20	2.63183e-18	1.17368e-07	1.99745e-05	BOTH
FBgn0010039	GstD3	3R:8198790-8199535	+	Known	YES	0.0782606	2.46364e-08	1.22187e-06	0.8377	0.979567	0.00176674	0.00565289	0.892604	1.76323e-36	2.4428e-34	0.00150976	0.0531142	BOTH
FBgn0010040	GstD4	3R:8199822-8200546	+	Known	YES	0.0262402	0.00144742	0.0183956	0.430917	0.892177	0.0055718	0.0158339	0.233022	0.00174636	0.00560236	0.577226	1	BASELINE
FBgn0010041	GstD5	3R:8201455-8202294	+	Known	YES	0.0267516	0.00129842	0.0168664	0.0156908	0.640933	0.033861	0.0742774	0.812565	2.57254e-16	5.09147e-15	2.13172e-09	5.81058e-07	BOTH
FBgn0010042	GstD6	3R:8202850-8203629	+	Known	YES	0.0113846	0.0366166	0.201862	0.395488	0.881742	0.032405	0.0716416	0.122744	0.0126877	0.0331424	0.999999	1	NONE
FBgn0010043	GstD7	3R:8204222-8204977	+	Known	YES	0.00192759	0.390917	0.76221	0.86695	0.983761	2.35423e-05	0.000100222	0.420933	5.12921e-08	3.81302e-07	0.343757	1	BOTH
FBgn0010044	GstD8	3R:8205730-8206537	+	Known	YES	0.00770835	0.0857643	0.344816	0.612278	0.943126	3.39689e-08	1.8609e-07	0.30733	0.00777075	0.0213357	0.0647675	0.507474	BASELINE
FBgn0010051	Itp-r83A	3R:1342839-1365133	+	Known	YES	0.0297942	0.0006814	0.00987272	0.369169	0.872693	1.98892e-11	1.37586e-10	0.457695	1.82505e-08	1.43164e-07	0.195541	0.863067	BOTH
FBgn0010052	Jhe	2R:12007298-12010278	+	Known	YES	0.000364942	0.709027	0.975859	0.745921	0.965309	2.67074e-07	1.36765e-06	0.439531	7.81076e-05	0.000340712	0.00966641	0.178742	BOTH
FBgn0010053	Jheh1	2R:14740939-14742592	-	Known	YES	0.0326453	0.000373153	0.00600898	0.794515	0.972179	0.00156963	0.00507258	0.913133	9.79779e-42	2.29714e-39	0.00346734	0.0909231	BOTH
FBgn0010078	RpL23	2R:18741906-18743217	+	Known	YES	0.000421434	0.688411	0.964374	0.310023	0.847953	0.287824	0.407187	0.0839799	0.291561	0.491684	0.760603	1	ETOH
FBgn0010097	gammaTub37C	2L:19183863-19185726	-	Known	YES	0.0165027	0.0117493	0.0920367	0.0294272	0.664932	2.62013e-14	2.34301e-13	0.380728	0.000290923	0.00111932	0.0412749	0.405021	BOTH
FBgn0010100	Acon	2L:21168570-21173185	+	Known	YES	5.08361e-05	0.889241	1	0.612122	0.943126	0.857117	0.901272	0.265207	7.03106e-06	3.73168e-05	1	1	BASELINE
FBgn0010105	comm	3L:15714611-15721530	-	Known	YES	0.00641038	0.117268	0.415651	0.0601057	0.685423	9.49547e-10	5.83517e-09	0.240591	0.412208	0.647312	0.0205421	0.27626	BASELINE
FBgn0010109	dpn	2R:4116476-4119835	-	Known	YES	0.000378432	0.703946	0.973925	0.689259	0.954726	0.172156	0.274775	0.157066	1	1	0.0671334	0.518017	BASELINE
FBgn0010113	hdc	3R:26103654-26198104	+	Known	YES	0.00102006	0.532641	0.870647	0.26887	0.830103	5.49715e-05	0.000223677	0.383733	2.85464e-06	1.62354e-05	0.248269	0.959368	BOTH
FBgn0010114	hig	2R:5115290-5134754	-	Known	YES	0.00017125	0.798251	1	0.015148	0.640933	9.99201e-16	1.02949e-14	0.435401	0.00392636	0.0115879	0.000628911	0.0279583	BOTH
FBgn0010173	RpA-70	3R:4087842-4090173	-	Known	YES	0.00510536	0.162298	0.498658	0.00453074	0.608945	0	0	0.319771	0.000124409	0.000520471	0.291285	1	BASELINE
FBgn0010194	Wnt5	X:18395434-18399438	-	Known	YES	4.78081e-05	0.89257	1	0.00033513	0.378235	1.95176e-05	8.3855e-05	0.54047	6.48306e-07	4.06961e-06	0.00129692	0.0471094	BOTH
FBgn0010197	Gyc32E	2L:11138759-11149101	-	Known	YES	0.00014871	0.81173	1	0.480774	0.909582	0.172358	0.275034	0.0822488	0.111737	0.221368	1	1	NONE
FBgn0010198	RpS15Aa	X:13229670-13231738	-	Known	YES	0.0117416	0.0337777	0.191635	0.461084	0.903603	0	0	0.331058	5.81555e-09	4.83097e-08	1	1	BASELINE
FBgn0010213	Sod2	2R:12660290-12661420	-	Known	YES	0.157473	6.20351e-16	1.23364e-13	0.297632	0.844017	0.0531405	0.107871	0.397943	1.05434e-10	1.09643e-09	1	1	BOTH
FBgn0010215	alpha-Cat	3L:23311746-23331200	-	Known	YES	0.000875652	0.563192	0.890498	0.117061	0.732527	0	0	0.203579	0.000352025	0.0013276	1	1	BASELINE
FBgn0010217	ATPsynbeta	4:1052110-1055543	+	Known	YES	0.00959622	0.0551137	0.262956	0.616977	0.944352	1.56894e-09	9.46958e-09	0.330767	8.5273e-09	6.95607e-08	1	1	BASELINE
FBgn0010220	Dbp45A	2R:4975339-4977307	+	Known	YES	0.0105368	0.0444044	0.228356	0.0353274	0.666368	0	0	0.361946	1.43842e-08	1.14226e-07	1	1	BASELINE
FBgn0010222	Nmdmc	3R:4868230-4876277	-	Known	YES	0.0113411	0.0369792	0.203022	0.615885	0.944352	2.93687e-09	1.73786e-08	0.652264	1.0312e-19	2.8763e-18	0.49345	1	BOTH
FBgn0010223	Galphaf	3L:16655657-16661034	-	Known	YES	0.00138558	0.467042	0.824141	0.829476	0.978305	0.0453222	0.0947079	0.487727	2.22586e-11	2.50256e-10	0.514132	1	BOTH
FBgn0010225	Gel	3R:60939-66779	+	Known	YES	0.00271105	0.30883	0.685751	0.18404	0.780796	0.000482754	0.00172146	0.503032	1.39526e-09	1.26055e-08	0.122104	0.697287	BOTH
FBgn0010226	GstS1	2R:12980751-12987006	-	Known	YES	0.00518458	0.159068	0.493619	0.255363	0.824066	0	0	0.497707	5.18758e-16	9.96699e-15	0.999999	1	BOTH
FBgn0010228	HmgZ	2R:17584993-17595366	-	Known	YES	0.0109653	0.0402726	0.214593	0.453732	0.90147	0.874203	0.913259	0.409504	0.00556395	0.0158288	0.00171511	0.0582598	BOTH
FBgn0010235	Klc	3L:12739716-12743156	-	Known	YES	0.000357452	0.711894	0.977217	0.0527513	0.679301	0	0	0.19633	0.00144252	0.00472714	0.938471	1	BASELINE
FBgn0010238	Lac	2R:8340695-8353135	+	Known	YES	0.0174614	0.00953175	0.0792673	0.5823	0.938062	0.562589	0.670705	0.804461	2.68362e-24	1.21095e-22	0.00198776	0.0638863	BOTH
FBgn0010240	Lcch3	X:15819138-15822562	+	Known	YES	0.00227141	0.35164	0.727737	0.744062	0.964961	0.12086	0.208415	0.0546331	0.605327	0.869417	0.75669	1	BASELINE
FBgn0010241	Mdr50	2R:10134471-10140102	+	Known	YES	0.00528774	0.154971	0.487002	0.125697	0.740776	7.50166e-08	4.01446e-07	0.952397	5.00573e-45	1.91096e-42	1.77151e-08	3.85673e-06	BOTH
FBgn0010246	Myo61F	3L:1318480-1329617	+	Known	YES	0.000626225	0.624944	0.927527	0.147925	0.755434	0.567001	0.674405	0.596274	3.52025e-09	3.01311e-08	0.00108225	0.0415525	BOTH
FBgn0010247	Parp	3RHet:1935206-2026815	+	Known	YES	0	1	1	0.559862	0.93371	0	0	0.745946	3.52775e-28	2.32367e-26	0.844006	1	BOTH
FBgn0010258	Rbp4	3R:9480278-9482116	-	Known	YES	0.0133056	0.0237858	0.151034	0.307485	0.847953	0.301642	0.421889	0.0785922	0.156992	0.2957	0.995014	1	NONE
FBgn0010263	Rbp9	2L:2954762-2968434	+	Known	YES	0.00196031	0.386922	0.758919	0.997363	0.99973	3.95231e-06	1.81435e-05	0.524271	8.70334e-06	4.53543e-05	0.000571293	0.0260406	BOTH
FBgn0010265	RpS13	2L:8363477-8364662	-	Known	YES	0.0191156	0.0066571	0.0609136	0.711662	0.959436	1.16698e-11	8.2169e-11	0.189104	0.00428775	0.0125255	0.804007	1	ETOH
FBgn0010269	Dsor1	X:9141375-9144070	+	Known	YES	0.00549524	0.147085	0.472939	0.0799983	0.700819	2.34413e-06	1.1016e-05	0.309806	0.000159604	0.000651294	0.326954	1	BASELINE
FBgn0010278	Ssrp	2R:19693884-19696527	-	Known	YES	0.0372564	0.000141287	0.00266269	0.173526	0.773184	1.09357e-13	9.18829e-13	0.43289	2.32455e-08	1.80197e-07	0.327372	1	BOTH
FBgn0010280	Taf4	3L:16106312-16114751	+	Known	YES	0.0202446	0.00521718	0.0505539	0.09252	0.713763	7.78722e-10	4.81543e-09	0.282926	0.0025625	0.00789207	0.207381	0.88673	BASELINE
FBgn0010282	TfIIFalpha	3R:2206189-2208326	+	Known	YES	0.000737211	0.595818	0.910021	0.138758	0.750086	3.16414e-14	2.80925e-13	0.171374	0.0149075	0.0382143	0.720795	1	BASELINE
FBgn0010287	Trf	2L:8072895-8073948	+	Known	YES	0.00134252	0.474052	0.828998	0.558692	0.933393	0	0	0.341834	4.96307e-07	3.17007e-06	0.7753	1	BASELINE
FBgn0010288	Uch	2L:2212738-2214211	-	Known	YES	0.00578912	0.136678	0.453119	0.0277129	0.660983	0	0	0.311076	0.000116857	0.000492071	0.351613	1	BASELINE
FBgn0010292	bys	X:7795913-7797676	+	Known	YES	0.0147037	0.0174444	0.122262	0.76141	0.96799	0	0	0.28497	3.09239e-06	1.74926e-05	1	1	BASELINE
FBgn0010296	ng4	X:3137987-3138253	-	Known	RARE	7.36501e-05	0.866877	1	0.544433	0.929804	0.272601	0.390799	0.0431439	0.317215	0.526472	1	1	NONE
FBgn0010300	brat	2L:19133816-19179758	+	Known	YES	0.00331681	0.260242	0.631832	0.301036	0.845307	2.70006e-13	2.17903e-12	0.451967	1.17105e-06	7.07672e-06	0.0515448	0.452157	BOTH
FBgn0010303	hep	X:12973238-12984467	-	Known	YES	0.0116636	0.0343778	0.193907	0.806618	0.974124	0.225113	0.33826	0.316047	1.86216e-05	9.16644e-05	0.530833	1	BOTH
FBgn0010309	pigeon	2L:19186043-19189938	+	Known	YES	0.00767347	0.0864791	0.346411	0.00300154	0.591391	0	0	0.265262	0.00574535	0.0162992	0.215344	0.901362	BASELINE
FBgn0010313	corto	3R:903501-912794	-	Known	YES	0.00682081	0.106121	0.392513	0.739607	0.963859	2.90004e-06	1.35016e-05	0.206591	0.137848	0.265169	0.145753	0.755048	BASELINE
FBgn0010314	Cks30A	2L:9330763-9331981	+	Known	YES	0.00198317	0.384165	0.756893	0.0269747	0.659914	0	0	0.324725	0.00705571	0.0195582	0.0406802	0.401393	BOTH
FBgn0010315	CycD	X:15800855-15803709	-	Known	YES	0.0011239	0.512475	0.857403	0.12586	0.740968	0	0	0.279582	5.64836e-05	0.000253206	0.696762	1	BASELINE
FBgn0010316	dap	2R:5599826-5603761	+	Known	YES	0.0035999	0.240811	0.609141	0.0155113	0.640933	0	0	0.350395	0.00220423	0.00690278	0.0361888	0.376334	BASELINE
FBgn0010317	CycJ	3L:3466428-3468098	+	Known	YES	0.0100306	0.049865	0.24611	0.31319	0.849744	0	0	0.335334	1.89258e-05	9.3066e-05	0.380722	1	BASELINE
FBgn0010323	Gsc	2L:583544-594685	-	Known	YES	0.000970945	0.54268	0.875751	0.00321725	0.591391	0.217192	0.328779	0.0652824	0.427539	0.666145	0.795896	1	NONE
FBgn0010328	woc	3R:23082317-23089777	-	Known	YES	0.000772504	0.587145	0.905276	0.119271	0.735161	1.9873e-13	1.62534e-12	0.287108	1.69272e-05	8.39897e-05	0.80541	1	BASELINE
FBgn0010329	Tbh	X:7889730-7921427	+	Known	YES	0.000790153	0.582904	0.902777	0.54945	0.930602	1.22267e-11	8.58916e-11	0.347151	0.0180588	0.0453009	0.00944837	0.176477	BOTH
FBgn0010333	Rac1	3L:1300879-1302683	-	Known	YES	0.000339228	0.719016	0.980694	0.344044	0.863961	0	0	0.34001	0.0147467	0.0378425	0.0145187	0.224505	BOTH
FBgn0010339	128up	2R:7924803-7926356	+	Known	YES	0.0180265	0.00842954	0.0724103	0.878215	0.985346	0	0	0.274476	2.54354e-06	1.45998e-05	1	1	BASELINE
FBgn0010340	140up	3R:9949885-9951270	-	Known	YES	0.105882	6.39017e-11	5.383e-09	0.150555	0.759609	1.55431e-15	1.56486e-14	0.0946288	0.0391946	0.0897838	1	1	BASELINE
FBgn0010341	Cdc42	X:19591124-19593971	+	Known	YES	0.00117413	0.503194	0.849818	0.35796	0.869565	0	0	0.284738	0.0727078	0.153525	0.0275582	0.325004	BASELINE
FBgn0010342	Map60	2R:5478372-5480249	+	Known	YES	0.000570345	0.640837	0.936997	0.0394015	0.671288	1.30052e-11	9.11312e-11	0.319815	0.000372748	0.00139836	0.197312	0.867238	BASELINE
FBgn0010348	Arf79F	3L:22861480-22865331	-	Known	YES	0.00961795	0.0548377	0.262163	0.147833	0.755434	0	0	0.133961	0.172007	0.319212	0.49964	1	BASELINE
FBgn0010350	CdsA	3L:8120862-8124775	+	Known	YES	0.000742121	0.594595	0.908976	0.183368	0.780318	0	0	0.0729526	0.0986759	0.199356	1	1	NONE
FBgn0010352	Nc73EF	3L:16947922-16961824	+	Known	YES	0.000344828	0.716805	0.979878	0.975086	0.996774	0.196577	0.304825	0.337317	2.48121e-05	0.000119539	0.339445	1	BASELINE
FBgn0010355	Taf1	3R:2472611-2481770	+	Known	YES	0.0331663	0.000334321	0.0055053	0.983769	0.997699	4.4893e-12	3.26668e-11	0.340585	5.86001e-05	0.000261609	0.242236	0.949598	BASELINE
FBgn0010356	Taf5	2R:6764817-6767178	-	Known	YES	0.000977064	0.54141	0.875463	0.122238	0.737796	0	0	0.326747	5.4245e-06	2.93334e-05	0.597815	1	BASELINE
FBgn0010357	betaTry	2R:7233830-7234900	+	Known	YES	0.0971081	4.30009e-10	3.09376e-08	0.975524	0.996774	7.20791e-07	3.55422e-06	0.877634	5.14855e-37	7.5378e-35	0.0277298	0.325899	BOTH
FBgn0010358	deltaTry	2R:7242824-7243633	+	Known	YES	0.110669	2.24434e-11	2.10773e-09	0.0816877	0.702796	1.70083e-06	8.10076e-06	0.701995	2.03286e-26	1.15518e-24	0.999999	1	BOTH
FBgn0010379	Akt1	3R:11924950-11931392	+	Known	YES	0.000612603	0.628735	0.930036	0.0591625	0.685423	0	0	0.424679	1.13193e-05	5.79216e-05	0.0472116	0.434256	BOTH
FBgn0010380	AP-1-2beta	X:19625037-19628614	+	Known	YES	0.0163449	0.0121618	0.0943847	0.832455	0.978345	0.233372	0.347553	0.215169	8.68944e-06	4.5294e-05	1	1	BASELINE
FBgn0010381	Drs	3L:3369556-3369942	+	Known	YES	0.00239938	0.338405	0.714773	0.66898	0.952849	1.42372e-08	8.02378e-08	0.568691	2.09574e-13	2.97728e-12	0.218194	0.906333	BOTH
FBgn0010382	CycE	2L:15727581-15748150	-	Known	YES	0.00077081	0.587556	0.905555	0.0304236	0.664932	2.22045e-16	2.42491e-15	0.431343	0.000246615	0.000963331	0.0066454	0.140126	BOTH
FBgn0010383	Cyp18a1	X:18582571-18587075	-	Known	YES	0.00847641	0.0715307	0.309446	0.00859393	0.640933	2.73115e-13	2.20359e-12	0.570659	4.92155e-10	4.72387e-09	0.0130363	0.212053	BOTH
FBgn0010385	Def	2R:5941683-5942081	-	Known	YES	0.0207652	0.00466393	0.0464274	0.175205	0.775915	1.06852e-08	6.07509e-08	0.84931	4.01272e-28	2.6174e-26	0.000344197	0.0178636	BOTH
FBgn0010387	Dbi	3L:7124963-7126563	+	Known	YES	0.0165053	0.0117426	0.0920085	0.899111	0.987962	0.0203554	0.0484745	0.555622	1.81811e-08	1.42687e-07	0.00461409	0.109558	BOTH
FBgn0010388	Dro	2R:10633466-10634219	+	Known	YES	0.00539595	0.150801	0.479741	0.803289	0.973721	7.4981e-06	3.35478e-05	0.490515	1.10798e-07	7.83205e-07	0.0358832	0.375018	BOTH
FBgn0010389	htl	3R:13870938-13878706	-	Known	YES	1.68877e-05	0.936025	1	0.738919	0.963859	3.65709e-05	0.0001523	0.552253	6.43154e-10	6.08266e-09	0.0269415	0.321219	BOTH
FBgn0010391	Gtp-bp	X:11020910-11023120	-	Known	YES	0.0175058	0.0094399	0.0789688	0.641321	0.947423	0.0282482	0.063824	0.0543877	0.210162	0.376435	0.999999	1	NONE
FBgn0010395	Itgbn	2L:21053033-21058044	+	Known	YES	6.37019e-06	0.960682	1	0.0504972	0.679301	6.5521e-05	0.000264228	0.574999	7.60212e-08	5.5037e-07	0.00062701	0.0279583	BOTH
FBgn0010397	LamC	2R:10458315-10463276	-	Known	YES	0.000713376	0.601826	0.912737	0.335368	0.859692	0	0	0.419752	6.24484e-12	7.49896e-11	1	1	BOTH
FBgn0010398	Lrr47	2L:10517335-10519269	+	Known	YES	0.00700305	0.101548	0.381552	0.0408375	0.672606	6.32168e-11	4.19892e-10	0.321916	0.00787472	0.0215893	0.041476	0.406479	BASELINE
FBgn0010399	Nmdar1	3R:1334564-1349050	-	Known	YES	0.00389057	0.22266	0.586462	0.47269	0.905911	6.59702e-11	4.37747e-10	0.203389	0.00546665	0.0155771	0.633727	1	BASELINE
FBgn0010401	Os-C	3R:3804681-3805336	+	Known	YES	0.000708487	0.603074	0.913369	0.0169951	0.643733	1.81136e-10	1.16503e-09	0.301774	0.00403687	0.0118817	0.107461	0.655656	BASELINE
FBgn0010403	Obp83b	3R:1801899-1802539	-	Known	YES	0.0016971	0.42083	0.785939	0.73809	0.963859	7.38133e-05	0.00029596	0.225535	0.0408496	0.0929658	0.197799	0.867896	NONE
FBgn0010406	RNaseX25	3L:7963688-7965549	+	Known	YES	0.0524665	5.7782e-06	0.000167005	0.279675	0.835692	0	0	0.0830759	0.102219	0.20545	1	1	BASELINE
FBgn0010407	Ror	2L:10251843-10254686	+	Known	YES	0.00056914	0.64119	0.937228	0.0397311	0.671288	0.0533955	0.108251	0.0826763	0.116889	0.230228	1	1	NONE
FBgn0010408	RpS9	3L:9502893-9504631	-	Known	YES	0.0474594	1.6554e-05	0.000424823	0.808747	0.974124	0.405318	0.525898	0.332063	7.20318e-08	5.23523e-07	1	1	ETOH
FBgn0010409	RpL18A	2R:13433911-13434967	-	Known	YES	7.1437e-07	0.986829	1	0.74383	0.964961	0.00798174	0.021684	0.149972	0.00157998	0.00513095	1	1	NONE
FBgn0010411	RpS18	2R:16151484-16152353	+	Known	YES	0.0057403	0.138348	0.456175	0.200489	0.792113	0.0324421	0.0716929	0.15393	0.15421	0.291394	0.385166	1	ETOH
FBgn0010412	RpS19a	X:16531927-16533282	+	Known	YES	0.00725571	0.0955585	0.367956	0.165601	0.768518	0.953588	0.969115	0.0736949	0.092741	0.189017	1	1	NONE
FBgn0010414	SerT	2R:20292118-20298597	-	Known	YES	0.00505078	0.164566	0.502542	0.790756	0.971306	6.14842e-13	4.79903e-12	0.137847	0.477536	0.725752	0.250474	0.961573	BASELINE
FBgn0010415	Sdc	2R:17279907-17368681	-	Known	YES	0.000742981	0.594382	0.908926	0.29201	0.841849	1.40665e-12	1.06615e-11	0.30132	0.262045	0.451165	0.00391662	0.0975576	BOTH
FBgn0010416	TH1	X:16282853-16285471	-	Known	YES	0.0183727	0.0078193	0.0687357	0.0264328	0.659392	0	0	0.278199	0.00336645	0.0100882	0.204953	0.882086	BASELINE
FBgn0010417	Taf6	3L:19592188-19594482	+	Known	YES	0.0241048	0.00228072	0.026477	0.0640402	0.686739	1.88627e-13	1.54648e-12	0.188981	0.000938021	0.00319962	1	1	NONE
FBgn0010421	TfIIFbeta	3R:6592344-6593526	-	Known	YES	0.00294974	0.288418	0.663883	0.0809299	0.702676	0	0	0.206813	0.00257824	0.00793615	0.737364	1	BASELINE
FBgn0010422	TfIIS	2L:15058919-15060757	-	Known	YES	0.0214028	0.00406663	0.0417075	0.0254677	0.655419	2.22045e-16	2.42491e-15	0.349695	0.00015655	0.000640281	0.13569	0.730574	BASELINE
FBgn0010423	TpnC47D	2R:7161350-7162791	-	Known	YES	0.0372044	0.000142839	0.00268591	0.352438	0.866839	1.62367e-08	9.11234e-08	0.365708	0.000303148	0.00116249	0.0648042	0.507638	BOTH
FBgn0010424	TpnC73F	3L:17039163-17041490	+	Known	YES	1.49541e-05	0.939792	1	0.91116	0.989679	0	0	0.44411	4.84598e-13	6.60184e-12	1	1	BASELINE
FBgn0010425	epsilonTry	2R:7232742-7233571	-	Known	YES	0.00960622	0.0549864	0.262641	0.215204	0.804515	0.00266799	0.00817895	0.887812	2.82584e-41	6.40148e-39	0.136994	0.734176	BOTH
FBgn0010431	mtrm	3L:8406112-8407203	+	Known	YES	0.0327185	0.000367434	0.00593685	0.087074	0.708008	0	0	0.350038	0.000232822	0.000914673	0.113875	0.672873	BASELINE
FBgn0010433	ato	3R:4103774-4104996	+	Known	RARE	0.00469592	0.180231	0.527878	0.552385	0.931111	0.977595	0.985209	0.124966	0.0222412	0.0545766	0.999999	1	NONE
FBgn0010434	cora	2R:15116568-15131256	+	Known	YES	0.012285	0.0298873	0.175974	0.432077	0.892177	0	0	0.65512	2.29509e-20	6.90113e-19	0.591936	1	BOTH
FBgn0010435	emp	2R:20863979-20873593	-	Known	YES	0.00273125	0.307032	0.684114	0.584099	0.938434	0.0149006	0.0371252	0.389797	9.43482e-08	6.73741e-07	0.531702	1	BOTH
FBgn0010438	mtSSB	3R:12029916-12030972	-	Known	YES	0.00426323	0.201717	0.558525	0.105294	0.722409	2.15659e-11	1.48541e-10	0.215812	0.000267159	0.00103621	1	1	BASELINE
FBgn0010441	pll	3R:23076853-23078904	-	Known	YES	0.000362178	0.710081	0.976493	0.39666	0.881742	3.55351e-11	2.41092e-10	0.338665	1.99386e-07	1.3587e-06	0.932019	1	BASELINE
FBgn0010452	trn	3L:13107371-13111177	+	Known	YES	0.0136289	0.0221345	0.143596	0.636666	0.946846	0.00648683	0.0181018	0.239488	0.00788957	0.0216212	0.315827	1	BASELINE
FBgn0010453	Wnt4	2L:7255419-7277171	-	Known	YES	0.00450946	0.189147	0.540876	0.0927626	0.713763	0.122233	0.210155	0.149467	0.0146702	0.037678	0.921564	1	BASELINE
FBgn0010470	Fkbp14	2R:17374672-17385434	-	Known	YES	0.0916122	1.40894e-09	9.33547e-08	0.906446	0.989224	0.178644	0.282799	0.684318	9.08446e-16	1.69963e-14	0.00804103	0.158541	BOTH
FBgn0010473	tutl	2L:4283148-4323781	+	Known	YES	0.00816592	0.0769537	0.323844	0.0233384	0.655419	0	0	0.279162	0.00195835	0.00620288	0.250209	0.961573	BASELINE
FBgn0010482	l(2)01289	2R:2608606-2628177	-	Known	YES	0.000917106	0.554092	0.884453	0.623276	0.944438	1.63853e-09	9.87183e-09	0.442848	5.00343e-08	3.72695e-07	0.210462	0.891497	BOTH
FBgn0010488	NAT1	2R:8803499-8811239	+	Known	YES	0.000999498	0.536802	0.872641	0.00424495	0.608945	0	0	0.193853	0.0877802	0.180409	0.251566	0.963358	BASELINE
FBgn0010497	dmGlut	2L:12027438-12034122	+	Known	YES	0.0191401	0.00662199	0.0607486	0.0140501	0.640933	0.00158247	0.00511062	0.456761	3.93477e-06	2.1892e-05	0.0247732	0.305357	BOTH
FBgn0010501	Dcp-1	2R:19438836-19441070	+	Known	YES	0.000366949	0.708264	0.975487	0.494384	0.91371	0	0	0.279439	0.0153262	0.0391527	0.0942239	0.615919	BASELINE
FBgn0010504	kermit	2R:4034423-4044159	-	Known	YES	0.0351072	0.000222099	0.00390882	0.729663	0.962588	1.17684e-14	1.08688e-13	0.406278	1.72714e-06	1.01857e-05	0.170933	0.813336	BASELINE
FBgn0010516	wal	2R:7576074-7578368	-	Known	YES	0.00189368	0.395121	0.765416	0.414106	0.886197	3.89633e-05	0.00016168	0.470807	1.88459e-14	3.01023e-13	1	1	BOTH
FBgn0010520	Bka	2L:9895287-9896104	+	Known	YES	0.000583934	0.636887	0.935139	0.219675	0.807061	0	0	0.30861	4.73619e-07	3.03788e-06	1	1	BASELINE
FBgn0010531	Ccs	2R:6008991-6010079	-	Known	YES	2.53077e-06	0.975212	1	0.0769192	0.697403	0	0	0.0383441	0.381088	0.608329	1	1	BASELINE
FBgn0010548	Aldh-III	2R:3354384-3364667	-	Known	YES	0.00193667	0.389803	0.76106	0.122961	0.73856	0.0176216	0.0428212	0.480466	8.75093e-15	1.45244e-13	1	1	BOTH
FBgn0010549	l(2)03659	2R:5277670-5282786	+	Known	YES	0.0077035	0.0858632	0.344924	0.906373	0.989224	0.286207	0.40538	0.819948	2.21182e-28	1.48311e-26	0.0183592	0.258566	BOTH
FBgn0010551	Phb2	2R:14706972-14709755	+	Known	YES	0.00148164	0.451987	0.812839	0.341143	0.863302	5.04317e-09	2.94062e-08	0.626087	7.27928e-16	1.37417e-14	0.153631	0.773398	BOTH
FBgn0010575	sbb	2R:14165703-14244801	-	Known	YES	0.00201676	0.380163	0.753265	0.882404	0.985514	0.084918	0.157383	0.229663	0.00015148	0.000622004	1	1	ETOH
FBgn0010583	dock	2L:825969-833241	+	Known	YES	0.000541836	0.649313	0.941778	0.326223	0.855597	1.33227e-14	1.22201e-13	0.546872	8.543e-10	7.94897e-09	0.0300749	0.338958	BOTH
FBgn0010590	Prosbeta1	2R:11901310-11902292	-	Known	YES	0.0164713	0.0118301	0.0924322	0.0138719	0.640933	0.0560395	0.11261	0.234771	0.00010898	0.000462034	0.999999	1	ETOH
FBgn0010591	Sply	2R:12975946-12979463	-	Known	YES	0.00281534	0.299691	0.676434	0.808254	0.974124	0.00729833	0.020032	0.184865	0.00158829	0.00515445	1	1	NONE
FBgn0010602	lwr	2L:540599-542580	-	Known	YES	0.00253921	0.324694	0.701114	0.208877	0.799442	4.23883e-13	3.36416e-12	0.315399	8.07813e-06	4.23181e-05	0.646569	1	BASELINE
FBgn0010607	l(2)05714	2L:4970135-4973921	-	Known	YES	0.000137494	0.818841	1	0.156093	0.762718	0	0	0.249874	0.00157338	0.00511299	0.460803	1	BASELINE
FBgn0010611	Hmgs	2R:12223595-12228747	+	Known	YES	0.00852364	0.0707423	0.307146	0.572372	0.93626	4.32903e-11	2.91407e-10	0.288836	4.59898e-06	2.52357e-05	0.9824	1	ETOH
FBgn0010612	ATPsynG	2L:10975522-10976399	-	Known	YES	0.00593224	0.131909	0.444142	0.680872	0.953856	0.00113254	0.00376794	0.30417	6.78727e-05	0.000299654	0.4636	1	ETOH
FBgn0010620	CG10939	2R:13282098-13292676	+	Known	YES	0.00982156	0.0523217	0.254035	0.869159	0.984045	1.90958e-14	1.73024e-13	0.227462	0.0442683	0.0997235	0.181706	0.83705	BASELINE
FBgn0010621	CCT5	2R:8062307-8065021	+	Known	YES	0.00810137	0.0781354	0.326386	0.210572	0.799996	1.11022e-16	1.26222e-15	0.139352	0.0122689	0.0321484	1	1	BASELINE
FBgn0010622	DCTN3-p24	2R:18948943-18950116	-	Known	YES	0.00277647	0.303056	0.680107	0.247796	0.820524	0	0	0.248853	3.63568e-06	2.03088e-05	0.999999	1	BASELINE
FBgn0010638	Sec61beta	2R:10506276-10507186	+	Known	YES	0.00101604	0.53345	0.870988	0.216417	0.805309	0.0717516	0.137537	0.258844	0.030617	0.0723242	0.107044	0.654392	BOTH
FBgn0010651	MFS14	2R:14684480-14691232	-	Known	YES	0.0384278	0.000110434	0.00216522	0.763721	0.968391	0	0	0.619561	4.75773e-11	5.15387e-10	0.00276468	0.0782196	BOTH
FBgn0010660	Nup214	2R:18806460-18812265	-	Known	YES	0.00205044	0.376211	0.749774	0.134772	0.748958	0	0	0.400111	2.65899e-06	1.52078e-05	0.172448	0.817776	BASELINE
FBgn0010704	rti	2L:2226342-2231099	+	Known	YES	0.00567557	0.140598	0.460552	0.208936	0.799442	0	0	0.20174	0.0586275	0.127471	0.266445	0.987041	BASELINE
FBgn0010741	Pfdn2	3L:11066392-11067488	-	Known	YES	0.00403868	0.214041	0.575336	0.549983	0.93097	2.22045e-16	2.42491e-15	0.262158	1.61029e-05	8.01847e-05	1	1	BASELINE
FBgn0010747	Srp54k	3L:5145778-5147877	+	Known	YES	0.0436087	3.71741e-05	0.000855227	0.981598	0.997566	0	0	0.164953	0.00205211	0.00647419	1	1	BASELINE
FBgn0010750	atms	3R:575757-603212	+	Known	YES	0.000731789	0.597174	0.910242	0.0476918	0.679301	0	0	0.326898	1.63214e-07	1.12478e-06	1	1	BASELINE
FBgn0010762	simj	3L:10657839-10683834	+	Known	YES	0.0040201	0.215101	0.576796	0.0759662	0.697225	8.09327e-07	3.9686e-06	0.448577	9.86345e-12	1.164e-10	1	1	BOTH
FBgn0010768	sqz	3R:14989933-14996298	+	Known	YES	0.00618138	0.124043	0.429268	0.145144	0.755434	5.31133e-09	3.09375e-08	0.450753	5.14905e-09	4.30719e-08	0.326475	1	BOTH
FBgn0010770	ppan	3R:16941976-16943621	+	Known	YES	0.0129091	0.0259867	0.160298	0.985561	0.997699	0	0	0.289217	6.52001e-07	4.091e-06	1	1	BASELINE
FBgn0010772	Xe7	3R:1490861-1495056	-	Known	YES	0.0284851	0.000898962	0.012398	0.8972	0.987474	3.47959e-05	0.000145269	0.268113	5.27033e-06	2.85827e-05	1	1	BASELINE
FBgn0010774	Ref1	3R:2903626-2906109	-	Known	YES	0.0147164	0.0173953	0.122033	0.0257749	0.655419	1.99729e-13	1.63311e-12	0.35296	6.46489e-06	3.44866e-05	0.36852	1	BASELINE
FBgn0010786	l(3)02640	3L:1334889-1339415	+	Known	YES	0.0711849	1.10979e-07	4.83221e-06	0.698511	0.957171	1.65534e-13	1.36349e-12	0.55498	1.05975e-11	1.2458e-10	0.10946	0.660416	BOTH
FBgn0010803	TrpRS	3R:5090749-5092626	-	Known	YES	5.61067e-06	0.963099	1	0.151889	0.759899	5.61107e-13	4.39291e-12	0.235615	0.000240479	0.000941885	0.878929	1	BASELINE
FBgn0010808	Chchd3	3R:26878338-26879637	-	Known	YES	0.0263427	0.00141626	0.0180337	0.755315	0.966888	0.502803	0.617695	0.29338	1.19544e-07	8.40945e-07	1	1	NONE
FBgn0010812	unc-45	3R:3859023-3862374	+	Known	YES	0.0023083	0.347754	0.72417	0.481548	0.909886	0	0	0.287897	2.426e-06	1.3973e-05	1	1	BASELINE
FBgn0010825	Gug	3L:8443022-8465769	+	Known	YES	0.0334546	0.000314606	0.00525027	0.466216	0.904715	0.0369809	0.0800473	0.258095	2.1353e-05	0.000104177	1	1	BASELINE
FBgn0010830	l(3)04053	3L:22731702-22734488	-	Known	YES	0.0426239	4.57186e-05	0.0010176	0.0222496	0.655419	8.33596e-07	4.08223e-06	0.345948	1.09424e-08	8.82102e-08	1	1	BASELINE
FBgn0010877	l(3)05822	3R:14114588-14124601	-	Known	YES	1.38769e-05	0.941997	1	0.22934	0.812532	0	0	0.60077	1.95184e-09	1.72754e-08	0.00114938	0.0434496	BOTH
FBgn0010894	sinu	3L:5552570-5554698	-	Known	YES	0.0171884	0.0101158	0.0826192	0.575101	0.936742	0	0	0.358335	0.0122427	0.0320847	0.00834277	0.16259	BOTH
FBgn0010905	Spn	3L:2505245-2554292	-	Known	YES	0.000431487	0.684913	0.962127	0.449928	0.899266	2.14315e-06	1.01055e-05	0.264266	2.99159e-05	0.000141805	0.938672	1	BASELINE
FBgn0010909	msn	3L:2554847-2586540	-	Known	YES	0.0115474	0.0352925	0.197079	0.67104	0.952976	3.48699e-12	2.56406e-11	0.265932	0.000119133	0.000500396	0.708915	1	BASELINE
FBgn0010926	l(3)07882	3R:13362654-13365685	-	Known	YES	0.0272543	0.00116699	0.0154769	0.38928	0.880261	0	0	0.41362	1.66473e-10	1.68876e-09	0.999999	1	BASELINE
FBgn0011016	SsRbeta	3L:16122717-16124083	+	Known	YES	0.000178613	0.794054	1	0.0278723	0.660983	2.40585e-12	1.79547e-11	0.248976	0.0214121	0.0527816	0.165389	0.800607	BASELINE
FBgn0011020	Sas-4	3R:2977089-2979941	+	Known	YES	0.018032	0.00841946	0.0723793	0.081919	0.702796	2.36478e-14	2.12716e-13	0.304654	0.00081053	0.00280817	0.204928	0.882086	BASELINE
FBgn0011202	dia	2L:20758144-20768053	+	Known	YES	0.0258434	0.00157483	0.0195625	0.589017	0.940253	4.66516e-13	3.68941e-12	0.250755	0.000368278	0.00138298	0.670697	1	BASELINE
FBgn0011204	cue	3L:1503226-1517271	-	Known	YES	0.0017025	0.420092	0.785217	0.214962	0.804409	3.33067e-15	3.22912e-14	0.617305	2.17426e-17	4.79581e-16	0.447264	1	BOTH
FBgn0011205	fbl	3L:20377529-20385013	+	Known	YES	0.0154402	0.0148314	0.108832	0.843673	0.98112	0.0366033	0.079358	0.372129	1.46195e-10	1.4948e-09	0.999999	1	ETOH
FBgn0011206	bol	3L:9090729-9127505	-	Known	YES	0.00572244	0.138965	0.45751	0.125345	0.740776	1.58325e-05	6.86204e-05	0.393261	0.000818907	0.00283309	0.0145241	0.224505	BOTH
FBgn0011207	pelo	2L:9700810-9708883	+	Known	YES	0.0117374	0.0338094	0.191711	0.147731	0.755434	0	0	0.218683	0.000362828	0.00136465	0.97004	1	BASELINE
FBgn0011211	blw	2R:18686604-18689685	+	Known	YES	1.02251e-05	0.950199	1	0.932833	0.990868	0.466504	0.584914	0.256029	6.88355e-05	0.000303624	0.887298	1	BASELINE
FBgn0011217	eff	3R:10558136-10567041	-	Known	YES	0.00846776	0.0716762	0.309756	0.206131	0.79751	0	0	0.0841929	0.176181	0.325589	0.911138	1	BASELINE
FBgn0011224	heph	3R:27672709-27841242	-	Known	YES	0.0142685	0.0192061	0.130349	0.128066	0.744245	5.02265e-13	3.95162e-12	0.660807	1.07652e-14	1.76577e-13	0.0119304	0.202117	BOTH
FBgn0011225	jar	3R:20078548-20096955	-	Known	YES	0.00384874	0.225168	0.589367	0.701058	0.957915	0.000104201	0.000410052	0.357333	3.19882e-10	3.15062e-09	0.999999	1	BASELINE
FBgn0011227	ox	2R:8644638-8645034	-	Known	YES	0.00123762	0.491864	0.842007	0.531696	0.925678	0.0036275	0.0107908	0.248929	0.00016869	0.000685535	0.811506	1	BASELINE
FBgn0011230	poe	2L:8054322-8071624	-	Known	YES	0.0168635	0.0108585	0.0868864	0.0116268	0.640933	0.813959	0.869558	0.492833	1.06851e-11	1.25434e-10	0.538003	1	BOTH
FBgn0011232	scat	2L:9431405-9435341	+	Known	YES	0.0190444	0.00676052	0.0615181	0.0400635	0.671288	0	0	0.158794	0.00169574	0.00545772	1	1	BASELINE
FBgn0011236	ken	2R:19757796-19764965	+	Known	YES	0.0123017	0.0297751	0.175632	0.652217	0.949951	3.44169e-15	3.33579e-14	0.260502	0.000190046	0.000763347	0.686443	1	BOTH
FBgn0011239	ms(2)35Ci	2L:15292468-15294136	+	Known	YES	0.00467616	0.181153	0.52939	0.216457	0.805368	0.0276634	0.0626931	0	1	1	1	1	NONE
FBgn0011241	cbx	2R:5752015-5762577	-	Known	YES	0.00862291	0.0691151	0.303025	0.0948965	0.713763	0	0	0.201476	7.78899e-05	0.000339851	1	1	BASELINE
FBgn0011244	Hsp60B	2L:728362-730564	+	Known	YES	2.15393e-05	0.927771	1	0.6437	0.947746	0.968106	0.978942	0.0871267	1	1	0.228177	0.925026	ETOH
FBgn0011259	Sema1a	2L:8542147-8672041	+	Known	YES	0.0124157	0.0290229	0.172496	0.724977	0.96214	3.93202e-05	0.00016294	0.381822	2.28005e-07	1.53964e-06	0.501563	1	BOTH
FBgn0011260	Sema2a	2R:12387683-12420964	+	Known	YES	0.000274004	0.74644	0.994278	0.389599	0.880263	0	0	0.545566	8.58329e-09	6.99834e-08	0.0112649	0.195587	BOTH
FBgn0011270	Pglym87	3R:8057367-8058451	-	Known	YES	0.00231208	0.347359	0.723843	0.208361	0.799442	0.0468206	0.0972146	0.0225013	1	1	0.756093	1	NONE
FBgn0011272	RpL13	2L:9967313-9968645	+	Known	YES	0.009752	0.0531672	0.256777	0.358072	0.869568	0.456781	0.575802	0.0210967	0.6203	0.885121	1	1	NONE
FBgn0011274	Dif	2L:17413248-17433161	-	Known	YES	0.000396014	0.697478	0.970489	0.0871826	0.708008	0.0420116	0.0890614	0.422077	1.70889e-05	8.47044e-05	0.0425156	0.411553	BOTH
FBgn0011276	HLH3B	X:2574232-2575756	-	Known	RARE	0.000614243	0.628276	0.9297	0.947628	0.992718	0.0924896	0.168454	0.0363973	0.396979	0.628222	1	1	NONE
FBgn0011277	HLH4C	X:4539160-4541447	-	Known	YES	0.00349876	0.247543	0.61688	0.926611	0.990437	0.612922	0.713214	0.0936109	1	1	0.195275	0.862921	NONE
FBgn0011278	lbe	3R:17267299-17272259	-	Known	YES	0.0108514	0.04133	0.21801	0.812634	0.97501	0.0193471	0.0463898	0.00981365	0.816471	1	1	1	NONE
FBgn0011279	Obp69a	3L:12389271-12390057	+	Known	YES	0.0348326	0.000235324	0.00410494	0.252149	0.823558	0.0642606	0.125738	0.105551	0.0408692	0.0929973	1	1	BASELINE
FBgn0011280	Obp19d	X:20290640-20292006	+	Known	YES	0.060412	1.08398e-06	3.73512e-05	0.246599	0.81913	2.861e-08	1.57635e-07	0.541675	6.02549e-09	4.99299e-08	0.0159766	0.238865	BOTH
FBgn0011281	Obp83a	3R:1797877-1800967	-	Known	YES	0.00168971	0.421844	0.786431	0.302933	0.845307	1.59696e-05	6.91787e-05	0.373437	0.0101018	0.0269843	0.00525874	0.119694	BOTH
FBgn0011282	Obp84a	3R:3076447-3077679	-	Known	YES	4.16841e-07	0.989939	1	0.851314	0.981934	0.46148	0.580162	0.0870461	0.451604	0.69524	0.594006	1	BASELINE
FBgn0011283	Obp28a	2L:7496791-7497365	-	Known	YES	0.0012664	0.486868	0.838422	0.12928	0.744469	0.0012793	0.00421892	0.431743	0.000794099	0.00275759	0.0028678	0.0798578	BOTH
FBgn0011284	RpS4	3L:13034856-13037334	+	Known	YES	0.00325051	0.265069	0.637241	0.879883	0.98537	2.36835e-05	0.000100797	0.142997	0.00155069	0.00504708	0.999999	1	NONE
FBgn0011286	RyR	2R:4747869-4775602	+	Known	YES	3.32855e-05	0.910278	1	0.755172	0.966888	0	0	0.332317	2.98922e-05	0.000141713	0.353702	1	BASELINE
FBgn0011288	Snap25	3L:24067280-24292305	+	Known	YES	0.0030132	0.283283	0.659029	0.0447112	0.675018	0.00930285	0.0247456	0.380824	0.00779476	0.0213895	0.00475545	0.112042	BOTH
FBgn0011289	TfIIA-L	3R:23076834-23082185	+	Known	YES	0.0179576	0.00855665	0.0732395	0.0536187	0.680656	6.69464e-13	5.20236e-12	0.245808	2.51387e-05	0.000120974	0.999999	1	BASELINE
FBgn0011290	Taf12	3R:7504108-7505412	-	Known	YES	0.0112535	0.0377209	0.205604	0.125	0.740514	0.0250099	0.0576659	0.0808128	0.864768	1	0.412323	1	NONE
FBgn0011291	Taf11	2L:9762424-9763262	-	Known	YES	0.00570759	0.13948	0.458376	0.0732169	0.696501	1.25899e-13	1.05045e-12	0.115844	0.0517395	0.114183	0.945972	1	NONE
FBgn0011293	a10	3L:17016223-17016841	-	Known	YES	0.0013899	0.466347	0.82386	0.0623453	0.685568	1.89085e-08	1.0543e-07	0.355977	0.000290266	0.00111731	0.0877781	0.592187	BOTH
FBgn0011294	a5	2L:1329161-1329993	+	Known	YES	0.00140893	0.463311	0.821613	0.710082	0.959261	0.154587	0.252652	0.327544	8.10756e-05	0.000352833	0.286088	1	BOTH
FBgn0011296	l(2)efl	2R:19572174-19573066	-	Known	YES	0.00400922	0.215724	0.577681	0.407525	0.884471	7.19197e-10	4.45145e-09	0.562955	3.75227e-15	6.49805e-14	0.587834	1	BOTH
FBgn0011297	l(2)not	2R:19592962-19597315	-	Known	YES	0.127248	5.76757e-13	7.10917e-11	0.155611	0.762433	0.483694	0.600937	0.301456	1.60692e-07	1.10809e-06	0.999999	1	BASELINE
FBgn0011300	babo	2R:4839844-4850301	+	Known	YES	0.000873648	0.563639	0.891079	0.280183	0.835949	8.8964e-07	4.34843e-06	0.244118	0.398359	0.63008	0.0190746	0.26355	ETOH
FBgn0011305	Rsf1	2L:10261795-10263554	-	Known	YES	0.0293997	0.00074071	0.0105676	0.945528	0.992718	2.22045e-16	2.42491e-15	0.4477	1.08763e-10	1.12865e-09	0.751796	1	BOTH
FBgn0011327	Uch-L5	3L:9468593-9470065	-	Known	YES	0.0273664	0.00113957	0.0152035	0.0137367	0.640933	2.22045e-16	2.42491e-15	0.297762	0.00174987	0.00561145	0.174709	0.822332	BASELINE
FBgn0011335	vers	3L:12109201-12111155	+	Known	YES	0.0497418	1.02469e-05	0.000279306	0.00616019	0.635276	5.29132e-13	4.15423e-12	0.286392	0.0385329	0.0884555	0.0428013	0.412784	BASELINE
FBgn0011336	Stt3B	3R:20892434-20895359	-	Known	YES	0.000197683	0.783598	1	0.942889	0.992215	9.89136e-08	5.24721e-07	0.184173	0.00161526	0.00522884	1	1	BASELINE
FBgn0011361	ND-ACP	3L:1329949-1331631	+	Known	YES	0.00387667	0.223489	0.587082	0.782551	0.970529	0.0140992	0.0353941	0.307419	5.95008e-08	4.37859e-07	1	1	BOTH
FBgn0011455	ND-SGDH	3L:12130596-12131684	-	Known	YES	0.0339796	0.000281649	0.00476671	0.75322	0.966888	0.000665515	0.00231672	0.259856	2.63994e-06	1.51117e-05	1	1	BASELINE
FBgn0011474	PR-Set7	3R:10141760-10146216	+	Known	YES	0.00174375	0.414513	0.781317	0.335858	0.859762	1.04949e-12	8.03262e-12	0.432048	0.000790711	0.00274774	0.00283577	0.079516	BOTH
FBgn0011476	l(3)neo43	3R:11103703-11104390	-	Known	YES	0.229788	1.8571e-23	7.8814e-21	0.244848	0.817609	1.4998e-07	7.84448e-07	0.349942	5.71802e-05	0.000255842	0.19815	0.868416	BOTH
FBgn0011481	Ssdp	3R:14018216-14025317	-	Known	YES	0.00484695	0.173364	0.51735	0.133869	0.748958	0.0330077	0.0727246	0.486401	9.01682e-08	6.46093e-07	0.045617	0.427493	BOTH
FBgn0011509	SrpRbeta	3L:8712049-8713325	-	Known	YES	0.00997795	0.0504718	0.2479	0.11574	0.731497	0	0	0.34882	6.91885e-06	3.67445e-05	0.390881	1	BOTH
FBgn0011554	etaTry	2R:7228018-7228928	-	Known	YES	0.00891	0.0646297	0.290577	0.806519	0.974124	0.193848	0.301598	0.738846	1.05297e-15	1.95367e-14	6.91863e-05	0.0048025	BOTH
FBgn0011555	thetaTry	2R:7229219-7230265	-	Known	YES	0.00169757	0.420766	0.785907	0.195131	0.788807	1.66533e-15	1.67513e-14	0.720583	7.03549e-11	7.46452e-10	1.57019e-07	2.55552e-05	BOTH
FBgn0011556	zetaTry	2R:7226691-7227637	-	Known	YES	0.0802755	1.60269e-08	8.35669e-07	0.379477	0.875504	0	0	0.650049	8.43195e-17	1.74505e-15	0.113388	0.671854	BOTH
FBgn0011559	Acp36DE	2L:18356047-18359026	-	Known	YES	4.6601e-05	0.893927	1	0.791929	0.971569	0.0498261	0.102421	0.0511646	0.49439	0.745901	0.86712	1	NONE
FBgn0011566	Smyd3	X:2500713-2502909	-	Known	YES	0.0297922	0.000681684	0.00987272	0.337697	0.860825	6.04765e-11	4.02169e-10	0.259311	0.000130528	0.000543359	0.75553	1	BASELINE
FBgn0011569	can	3L:10257009-10260211	-	Known	YES	0.00134888	0.473006	0.828419	0.902748	0.988463	0.0220219	0.0517679	0.113384	0.0124708	0.0326367	1	1	NONE
FBgn0011570	cpb	2L:1704902-1706962	+	Known	YES	0.0103061	0.0468105	0.236295	0.662576	0.951612	0	0	0.175634	0.20448	0.368036	0.218674	0.907002	BASELINE
FBgn0011571	caz	X:16182843-16187553	+	Known	YES	0.00105797	0.525117	0.865821	0.330243	0.857032	0.0843012	0.156447	0.407702	0.0229785	0.0561392	0.000472126	0.0226128	BOTH
FBgn0011573	Cdc37	3L:1795392-1797307	+	Known	YES	0.00432252	0.198603	0.554048	0.0412464	0.672606	0	0	0.186664	0.00101415	0.00344	0.999999	1	BASELINE
FBgn0011576	Cyp4d2	X:2070039-2072761	+	Known	YES	0.038449	0.000109942	0.00215683	0.894179	0.986811	2.10934e-07	1.09016e-06	0.784812	2.05088e-27	1.25354e-25	0.132851	0.724951	BOTH
FBgn0011581	Ms	3R:20167273-20169547	+	Known	YES	0.0331791	0.000333418	0.00549583	0.34477	0.863961	1.05448e-08	5.99729e-08	0.287294	0.185238	0.339222	0.010292	0.185817	BASELINE
FBgn0011582	Dop1R1	3R:9991101-10040532	-	Known	YES	0.00172586	0.416918	0.782562	0.30147	0.845307	3.89289e-11	2.63105e-10	0.327242	0.000210326	0.000835991	0.207043	0.886302	BOTH
FBgn0011584	Trp1	2L:10009381-10013170	+	Known	YES	0.00337627	0.256006	0.626871	0.517015	0.921321	0	0	0.173621	0.00229339	0.00715126	1	1	BASELINE
FBgn0011586	e(r)	X:8798177-8800281	-	Known	YES	0.000537162	0.650729	0.942054	0.668192	0.952651	0	0	0.504767	4.22498e-11	4.60354e-10	0.311928	1	BOTH
FBgn0011589	Elk	2R:13761444-13814200	+	Known	YES	0.00862946	0.0690092	0.302766	0.513997	0.920351	6.41327e-08	3.44743e-07	0.484749	5.89831e-07	3.72626e-06	0.0208469	0.277796	BOTH
FBgn0011591	fng	3L:20918991-20942612	-	Known	YES	0.0119136	0.0324919	0.18647	0.00289593	0.591391	1.51661e-11	1.05567e-10	0.297954	2.32146e-06	1.34285e-05	0.992637	1	BOTH
FBgn0011592	fra	2R:8416558-8451689	+	Known	YES	0.000773889	0.58681	0.905051	0.115554	0.73108	6.91e-10	4.27929e-09	0.563338	6.69327e-14	1.00766e-12	0.331892	1	BOTH
FBgn0011596	fzo	3R:19027366-19029756	-	Known	YES	0.0234205	0.00263957	0.0297069	0.880608	0.985514	5.59774e-13	4.38555e-12	0.169324	0.00152742	0.00498004	1	1	BASELINE
FBgn0011603	ine	2L:4468000-4477022	-	Known	YES	0.00179207	0.408114	0.775714	0.658854	0.951304	0	0	0.461716	1.17758e-08	9.44971e-08	0.200906	0.874962	BOTH
FBgn0011604	Iswi	2R:8524176-8528133	+	Known	YES	0.0199238	0.0055907	0.0533256	0.174268	0.773863	0	0	0.542302	4.02594e-11	4.39076e-10	0.109539	0.66076	BOTH
FBgn0011606	Klp3A	X:2493191-2498085	-	Known	YES	0.00352654	0.245671	0.61487	0.0914285	0.713763	1.18272e-11	8.3225e-11	0.285961	0.00188129	0.00598538	0.220399	0.910766	BASELINE
FBgn0011638	La	2L:20348393-20350012	-	Known	YES	0.00484472	0.173463	0.517458	0.260575	0.827266	0	0	0.357469	3.3855e-07	2.22517e-06	0.674372	1	BASELINE
FBgn0011640	lark	3L:7332366-7334993	+	Known	YES	0.0122485	0.0301334	0.176839	0.185173	0.782091	0.0145254	0.0363065	0.162035	0.00259966	0.00799256	1	1	NONE
FBgn0011642	Zyx	4:1077991-1085627	-	Known	YES	0.00629928	0.120502	0.422205	0.032766	0.664932	0	0	0.558436	2.76114e-15	4.87203e-14	0.67248	1	BOTH
FBgn0011648	Mad	2L:3146056-3159643	-	Known	YES	0.0131083	0.0248558	0.155619	0.173764	0.773321	0	0	0.398637	2.81124e-06	1.6013e-05	0.175563	0.824401	BASELINE
FBgn0011653	mas	3L:4161666-4167464	-	Known	RARE	0.00114135	0.509217	0.855041	0.845846	0.981157	0.510941	0.625172	0.0259407	0.84905	1	0.856053	1	NONE
FBgn0011655	Med	3R:27436768-27441097	+	Known	YES	2.21932e-05	0.926686	1	0.380718	0.876605	0.104424	0.185532	0.390393	0.000726264	0.00254701	0.0174558	0.251608	BOTH
FBgn0011656	Mef2	2R:5801001-5846363	-	Known	YES	0.00238011	0.340354	0.716415	0.476654	0.907173	0.000218974	0.00082527	0.268182	0.000504435	0.00183131	0.480029	1	BASELINE
FBgn0011659	Mlh1	2R:4057779-4059906	+	Known	YES	0.00292553	0.290408	0.666154	0.180305	0.779905	2.32696e-11	1.59849e-10	0.249891	0.0063327	0.0177984	0.282767	1	BASELINE
FBgn0011660	Pms2	2R:11255579-11259025	-	Known	YES	0.0153332	0.0151845	0.110739	0.01614	0.640933	0	0	0.362732	0.000333228	0.00126424	0.067647	0.519593	BASELINE
FBgn0011661	Moe	X:8767045-8792365	-	Known	YES	0.0237202	0.00247585	0.0282532	0.702764	0.958147	0	0	0.492416	0.000320378	0.00122033	0.000226136	0.0129159	BOTH
FBgn0011666	msi	3R:21341840-21434145	+	Known	YES	0.000249801	0.757531	0.999775	0.403151	0.881778	5.42781e-07	2.7023e-06	0.297766	0.000874342	0.00300287	0.231129	0.930462	BASELINE
FBgn0011668	Mst57Da	3R:21657297-21657621	-	Known	YES	0.00178356	0.409231	0.776473	0.812657	0.97501	0.129254	0.219535	0	1	1	1	1	NONE
FBgn0011669	Mst57Db	3R:21656442-21656636	-	Known	YES	0.000774551	0.58665	0.905013	0.484574	0.911013	0.00691151	0.0191174	0.024466	1	1	0.735555	1	NONE
FBgn0011670	Mst57Dc	3R:21655043-21655420	-	Known	YES	0.00554437	0.145285	0.469402	0.970536	0.996328	0.022341	0.0523879	0.0899532	0.794643	1	0.383712	1	NONE
FBgn0011672	Mvl	3R:16877105-16886522	-	Known	YES	0.0319482	0.000432282	0.00678022	0.00181467	0.553421	0	0	0.380009	5.00075e-08	3.72578e-07	0.699593	1	BASELINE
FBgn0011674	insc	2R:16708767-16723533	-	Known	YES	0.0356474	0.000198223	0.00354822	0.459147	0.902896	2.21267e-13	1.80219e-12	0.602741	1.47415e-17	3.27962e-16	0.659297	1	BOTH
FBgn0011676	Nos	2L:10804274-10837511	-	Known	YES	0.0413598	5.96282e-05	0.00127742	0.620727	0.944438	5.62264e-09	3.26883e-08	0.405352	1.38663e-10	1.42083e-09	1	1	BOTH
FBgn0011692	pav	3L:4242734-4246233	+	Known	YES	0.029601	0.000709829	0.0101964	0.0396627	0.671288	0	0	0.361828	0.000391305	0.00146167	0.0642445	0.505524	BOTH
FBgn0011693	Pdh	3L:16346333-16347397	-	Known	YES	0.0347015	0.000241913	0.00418949	0.311249	0.848531	8.5815e-05	0.000341305	0.61033	9.29388e-14	1.37711e-12	0.0645798	0.506709	BOTH
FBgn0011694	EbpII	2R:21061091-21061753	-	Known	YES	0.00173002	0.416357	0.782057	0.824459	0.977968	8.04706e-05	0.000321346	0.0718189	0.294813	0.496136	0.864472	1	NONE
FBgn0011695	EbpIII	2R:19913695-19915041	+	Known	YES	0.00383239	0.226157	0.590803	0.812678	0.97501	0	0	0.498707	1.4485e-14	2.34043e-13	1	1	BOTH
FBgn0011701	repo	3R:14061914-14065324	+	Known	YES	0.000371987	0.706361	0.974695	0.192563	0.7882	0	0	0.347173	0.00135603	0.00446991	0.0527452	0.456712	BOTH
FBgn0011703	RnrL	2L:10325026-10327943	-	Known	YES	0.011597	0.0348991	0.195826	0.0775636	0.697462	0	0	0.340665	0.000189097	0.000760358	0.157509	0.783619	BASELINE
FBgn0011704	RnrS	2R:7870650-7872898	-	Known	YES	0.0252381	0.00179133	0.0216973	0.144786	0.754923	0	0	0.405757	3.71493e-05	0.000172675	0.0506627	0.448437	BOTH
FBgn0011705	rost	2L:8985936-8989539	-	Known	YES	0.00216242	0.363474	0.738825	0.017257	0.643733	0	0	0.25788	2.62377e-05	0.000125667	1	1	BASELINE
FBgn0011706	rpr	3L:18390635-18391535	-	Known	YES	0.00542436	0.149727	0.478042	0.922985	0.990437	0.656994	0.748413	0.115052	0.051449	0.113639	0.954544	1	NONE
FBgn0011708	Syx5	2L:16307346-16309274	+	Known	YES	0.000467184	0.672862	0.955025	0.0790065	0.700819	2.22045e-15	2.19789e-14	0.221348	0.0031828	0.00959619	0.576369	1	BASELINE
FBgn0011710	Sep1	X:21229313-21232715	+	Known	YES	0.00116132	0.505533	0.851622	0.0289251	0.660983	0	0	0.290769	0.000255814	0.000996826	0.400888	1	BASELINE
FBgn0011715	Snr1	3R:1296648-1298476	+	Known	YES	0.0235965	0.00254217	0.0288236	0.03515	0.666368	5.77116e-12	4.16329e-11	0.348619	0.000125482	0.00052457	0.152318	0.770518	BOTH
FBgn0011722	Tig	2L:6415179-6423310	-	Known	YES	0.000354249	0.713131	0.977838	0.15186	0.759899	0	0	0.589617	1.44212e-14	2.33125e-13	0.231737	0.932094	BOTH
FBgn0011723	byn	3L:11920793-11929019	+	Known	YES	0.000648237	0.618924	0.924224	0.213068	0.8027	1.08802e-14	1.00679e-13	0.115489	0.0200691	0.0497859	1	1	NONE
FBgn0011725	twin	3R:20022615-20047687	-	Known	YES	6.66715e-05	0.873285	1	0.148028	0.755434	0	0	0.34062	0.0112511	0.0297207	0.0173785	0.251205	BASELINE
FBgn0011726	tsr	2R:19931976-19934328	-	Known	YES	0.0013238	0.477153	0.83173	0.0400312	0.671288	0	0	0.173309	0.00346131	0.0103355	0.99044	1	BASELINE
FBgn0011737	Wee1	2L:6911090-6914138	-	Known	YES	0.00341989	0.252952	0.623478	0.0299968	0.664932	0	0	0.382646	3.45382e-06	1.93671e-05	0.239785	0.946019	BOTH
FBgn0011739	wts	3R:26615347-26632341	-	Known	YES	0.169758	3.61805e-17	8.25186e-15	0.071387	0.693855	0.427808	0.547832	0.521254	5.83857e-13	7.88043e-12	0.541205	1	BOTH
FBgn0011740	alpha-Man-IIa	3R:5238270-5242986	+	Known	YES	0.0198478	0.00568313	0.054022	0.936645	0.991862	0	0	0.495105	2.0696e-11	2.3347e-10	0.451899	1	BOTH
FBgn0011741	Arp6	X:15629807-15631153	-	Known	YES	0.00555293	0.144974	0.468828	0.494193	0.91371	1.92935e-12	1.44986e-11	0.187238	0.000311695	0.00119091	1	1	BASELINE
FBgn0011742	Arp2	X:16442323-16448001	-	Known	YES	0.0019927	0.383024	0.75579	0.597717	0.941087	0	0	0.291069	0.000516423	0.0018724	0.319366	1	BASELINE
FBgn0011743	Arp53D	2R:12661751-12663181	+	Known	YES	0.000842934	0.570579	0.895073	0.540319	0.928446	0.0220727	0.0518604	0.00998444	0.999999	1	0.890391	1	NONE
FBgn0011745	Arp1	3R:8517465-8519954	+	Known	YES	0.00314261	0.273163	0.648061	0.00314423	0.591391	6.46315e-08	3.47281e-07	0.0457854	0.364721	0.587461	1	1	NONE
FBgn0011746	ana	2R:4949800-4965059	+	Known	YES	0.00302754	0.282139	0.657945	0.496045	0.914138	7.38087e-06	3.30542e-05	0.333482	2.23064e-05	0.000108496	0.376257	1	BOTH
FBgn0011747	Ank	4:135700-150475	-	Known	YES	0.000939809	0.549226	0.880542	0.449252	0.898783	0	0	0.0615964	0.175333	0.324271	1	1	NONE
FBgn0011754	PhKgamma	X:11589170-11598427	+	Known	YES	1.01708e-05	0.950331	1	0.210012	0.799683	4.38094e-13	3.4712e-12	0.429216	7.91323e-07	4.90401e-06	0.12182	0.696618	BOTH
FBgn0011758	B-H1	X:17291511-17297311	+	Known	YES	0.00396886	0.218053	0.580435	0.960717	0.994891	0.000238082	0.000892367	0.0354181	0.703216	0.971952	0.861466	1	NONE
FBgn0011760	ctp	X:4581833-4596067	+	Known	YES	0.000444337	0.68051	0.959633	0.262755	0.828843	0	0	0.199565	0.0158853	0.0404186	0.479573	1	BASELINE
FBgn0011761	dhd	X:5206204-5207158	+	Known	YES	0.0010166	0.533336	0.870907	0.0599535	0.685423	0	0	0.393574	2.25182e-07	1.52242e-06	0.40769	1	BOTH
FBgn0011762	DNApol-alpha50	3L:8333414-8337504	+	Known	YES	0.0121183	0.0310287	0.180448	0.113428	0.729095	0	0	0.358791	0.00104145	0.00352088	0.0423275	0.410831	BASELINE
FBgn0011763	Dp	2R:9109938-9115707	+	Known	YES	0.0114403	0.0361582	0.200211	0.193688	0.788383	0	0	0.350754	0.00575646	0.0163252	0.0194156	0.265801	BASELINE
FBgn0011764	Dsp1	X:16227645-16234657	+	Known	YES	0.0622545	7.34752e-07	2.6403e-05	0.967678	0.99554	0	0	0.365368	5.75307e-11	6.17423e-10	1	1	BASELINE
FBgn0011766	E2f1	3R:17446026-17486593	-	Known	YES	0.0150751	0.0160722	0.115213	0.186761	0.782809	0.00277096	0.00846364	0.302555	0.0016492	0.00532633	0.160268	0.78984	BASELINE
FBgn0011768	Fdh	3R:6696628-6698103	-	Known	YES	0.132196	1.91177e-13	2.55363e-11	0.481219	0.909719	7.84635e-10	4.85021e-09	0.666385	7.26955e-17	1.52044e-15	0.0579064	0.480004	BOTH
FBgn0011769	Fdx1	3L:9363295-9364338	-	Known	YES	0.0673065	2.52505e-07	1.01752e-05	0.565522	0.935189	3.15141e-11	2.14593e-10	0.302393	0.0185377	0.046361	0.0436252	0.417585	BOTH
FBgn0011770	Gip	X:10222910-10223905	-	Known	YES	0.0081057	0.0780555	0.326386	0.149808	0.758454	0	0	0.526908	3.86808e-15	6.68135e-14	1	1	BOTH
FBgn0011771	Hem	3L:22277454-22281295	-	Known	YES	0.0131057	0.0248706	0.155683	0.595912	0.941087	0	0	0.162439	0.478395	0.72674	0.149789	0.764533	BASELINE
FBgn0011774	Irbp	3R:7235769-7238162	+	Known	YES	0.000144361	0.814452	1	0.080568	0.702637	4.44089e-16	4.71912e-15	0.305715	0.000172225	0.000698885	0.344974	1	BASELINE
FBgn0011785	BRWD3	3R:20144722-20154341	+	Known	YES	0.017316	0.0098384	0.0809453	0.244733	0.817551	0.110504	0.194028	0.215154	0.00174174	0.0055902	0.73168	1	ETOH
FBgn0011787	mRpL12	3L:8949891-8950684	+	Known	YES	0.00433581	0.197913	0.552906	0.0396634	0.671288	0.322232	0.442674	0.197535	0.000834073	0.00287932	1	1	NONE
FBgn0011802	Gem3	3L:10452181-10456201	-	Known	YES	0.0163373	0.0121821	0.0944997	0.0448061	0.675234	0	0	0.289034	0.000188479	0.00075851	0.450998	1	BASELINE
FBgn0011812	Lcp1Psi	2R:4320391-4320889	-	Known	RARE	0.0106427	0.0433435	0.225159	0.675278	0.953166	0.0963881	0.174222	0.0496282	0.629776	0.895707	0.783913	1	NONE
FBgn0011817	nmo	3L:7972146-8047247	+	Known	YES	0.00412676	0.209104	0.568707	0.166204	0.769193	2.88658e-14	2.57305e-13	0.322325	0.000271827	0.00105322	0.210126	0.891195	BOTH
FBgn0011818	oaf	2L:2492955-2498846	+	Known	YES	0.00316131	0.271738	0.646139	0.148156	0.755434	0	0	0.47247	1.36453e-07	9.51113e-07	0.0626668	0.500021	BOTH
FBgn0011822	Pgcl	X:330172-331481	-	Known	YES	0.00506035	0.164166	0.501956	0.998582	0.999755	2.80953e-07	1.43587e-06	0.586359	1.63428e-06	9.6704e-06	2.83693e-05	0.00229612	BOTH
FBgn0011823	Pen	2L:10056900-10060095	+	Known	YES	0.00266552	0.312934	0.68946	0.217816	0.805686	0	0	0.451358	9.0897e-06	4.7175e-05	0.0199721	0.271095	BOTH
FBgn0011824	CG4038	2R:16983463-16984810	-	Known	YES	0.0150307	0.0162304	0.116074	0.754611	0.966888	0.660668	0.751178	0.462693	0.000678998	0.00239554	0.000669169	0.0290387	BOTH
FBgn0011826	Pp2B-14D	X:16448660-16454049	-	Known	YES	0.00292481	0.290468	0.666245	0.235696	0.813008	1.64868e-13	1.35901e-12	0.354102	1.10172e-06	6.68793e-06	0.55737	1	BOTH
FBgn0011828	Pxn	3L:2601455-2630064	-	Known	YES	0.00245338	0.333021	0.709036	0.632443	0.946814	0	0	0.592069	1.84633e-14	2.95333e-13	0.202039	0.877773	BOTH
FBgn0011829	Ret	2L:21182446-21198762	-	Known	YES	0.00406307	0.212661	0.573233	0.170879	0.771457	0.000132088	0.000512806	0.152731	0.0165949	0.0420066	0.865665	1	BASELINE
FBgn0011832	Ser12	2L:2250431-2251275	-	Known	YES	0.669515	7.16468e-94	2.4021e-89	0.51339	0.920096	0.263345	0.380737	0.694105	6.49997e-28	4.16682e-26	1	1	BOTH
FBgn0011834	Ser6	X:20833632-20834532	-	Known	YES	0.00540437	0.150482	0.479308	0.782021	0.970529	0.556247	0.664878	0.851243	1.40981e-47	6.65729e-45	1	1	BOTH
FBgn0011836	Taf2	3L:9877511-9881783	-	Known	YES	0.00135413	0.472145	0.827996	0.221115	0.808481	0	0	0.325363	4.88205e-05	0.000221819	0.349362	1	BASELINE
FBgn0011837	Tis11	X:12553448-12576587	+	Known	YES	0.00314843	0.272719	0.647633	0.204151	0.795967	0	0	0.224377	0.221083	0.39266	0.0645472	0.506572	BASELINE
FBgn0011840	tRNA:Ala-AGC-2-3	3R:13445866-13445938	-	Known	RARE	-1.11022e-16	1	1	0.891065	0.986044	0.0806127	0.151015	0.101712	1	1	0.171855	0.816119	NONE
FBgn0011844	tRNA:Asp-GTC-1-10	3L:13242647-13242718	+	Known	YES	0.000801656	0.580173	0.900674	0.334381	0.859567	0.300138	0.42051	0.127859	0.0298141	0.0706865	0.964745	1	NONE
FBgn0011845	tRNA:Asp-GTC-1-11	3R:20381024-20381095	+	Known	YES	-2.22045e-16	1	1	0.345193	0.863961	0.234046	0.348329	0.0301771	1	1	0.676953	1	NONE
FBgn0011848	tRNA:Glu-TTC-1-6	2R:15615486-15615557	-	Known	RARE	2.22045e-16	1	1	0.566523	0.935575	0.986645	0.991556	0.0637928	0.143589	0.274542	1	1	NONE
FBgn0011849	tRNA:Glu-TTC-1-5	2R:15614965-15615036	-	Known	YES	0	1	1	0.864786	0.983665	0.000179627	0.000685223	0.105423	0.269667	0.461564	0.604043	1	NONE
FBgn0011850	tRNA:Glu-TTC-1-4	2R:15613647-15613718	-	Known	YES	0.000515849	0.657278	0.945655	0.193509	0.788383	0.131325	0.222275	0.115945	0.0456282	0.10236	0.975061	1	NONE
FBgn0011855	tRNA:Glu-CTC-3-9	3L:1401781-1401852	+	Known	RARE	1.11022e-16	1	1	0.759887	0.967453	0.646073	0.73982	0.0700809	0.841194	1	0.497515	1	NONE
FBgn0011858	tRNA:Phe-GAA-1-8	3R:12147125-12147197	+	Known	RARE	-2.22045e-16	1	1	0.242497	0.817248	0.136476	0.228993	0.149068	0.0169862	0.0428902	0.894158	1	ETOH
FBgn0011859	tRNA:Gly-GCC-1-1	2L:1938089-1938159	-	Known	RARE	1.11022e-16	1	1	0.00918482	0.640933	0.104695	0.185875	4.73908e-13	0.999999	1	1	1	NONE
FBgn0011860	tRNA:Gly-GCC-1-2	2L:2031692-2031762	+	Known	RARE	0.00149881	0.449376	0.810807	0.361361	0.870219	0.455966	0.575057	0.052259	0.594602	0.857871	0.784584	1	NONE
FBgn0011861	tRNA:Gly-GCC-1-3	2L:7872849-7872919	+	Known	RARE	0	1	1	0.214105	0.803847	0.621898	0.720907	0.115281	0.712193	0.980805	0.27191	0.996646	NONE
FBgn0011863	tRNA:Gly-GCC-1-5	2L:14518307-14518377	-	Known	RARE	1.11022e-16	1	1	0.971801	0.996328	0.289773	0.409393	0.00151062	0.971348	1	1	1	NONE
FBgn0011864	tRNA:Gly-GCC-1-6	2L:14518621-14518691	-	Known	RARE	0	1	1	0.865193	0.983665	0.911519	0.93956	0.108224	0.999999	1	0.176811	0.826274	NONE
FBgn0011865	tRNA:Gly-GCC-1-7	2L:14530546-14530616	-	Known	RARE	-2.22045e-16	1	1	0.134949	0.748958	0.733879	0.809396	0.2013	0.000201965	0.000806391	0.999999	1	ETOH
FBgn0011868	tRNA:Gly-GCC-1-9	2R:14527231-14527301	-	Known	RARE	-4.44089e-16	1	1	0.894171	0.986811	0.773619	0.83944	0	1	1	1	1	NONE
FBgn0011869	tRNA:Gly-GCC-1-10	2R:16116986-16117056	+	Known	RARE	-2.22045e-16	1	1	0.171614	0.771601	0.104602	0.185741	0.0648168	1	1	0.370424	1	NONE
FBgn0011870	tRNA:Gly-GCC-1-11	2R:16120302-16120372	+	Known	RARE	0	1	1	0.254997	0.824021	0.450832	0.570192	0.044729	1	1	0.545805	1	NONE
FBgn0011871	tRNA:Gly-GCC-1-12	2R:17048861-17048931	-	Known	YES	0	1	1	0.887832	0.985863	0.44975	0.569166	6.38954e-14	1	1	1	1	NONE
FBgn0011877	tRNA:His-GTG-2-1Psi	2R:8224238-8224309	+	Known	YES	0.045394	2.55478e-05	0.000617104	0.339766	0.862595	0.159327	0.258559	0.303474	5.74626e-08	4.2407e-07	0.999999	1	BASELINE
FBgn0011878	tRNA:His-GTG-1-4	2R:8223923-8223994	+	Known	YES	-1.11022e-16	1	1	0.850186	0.981868	0.0116743	0.0300864	0.109645	0.26959	0.46146	0.570621	1	NONE
FBgn0011879	tRNA:Ala-TGC-2-1	2R:13279720-13279791	+	Known	RARE	0	1	1	0.276918	0.83399	0.539653	0.650238	0.0728523	0.570445	0.831825	0.626678	1	BASELINE
FBgn0011880	tRNA:Ile-AAT-1-1	2R:2053656-2053729	+	Known	YES	0	1	1	0.930161	0.990599	0.265634	0.383151	0.0257517	0.563781	0.823931	1	1	NONE
FBgn0011881	tRNA:Ile-AAT-1-3	2R:9317787-9317860	-	Known	RARE	2.22045e-16	1	1	0.321142	0.854197	0.566554	0.674022	0	1	1	1	1	NONE
FBgn0011882	tRNA:Ile-AAT-1-4	2R:9318489-9318562	+	Known	YES	1.11022e-16	1	1	0.167156	0.769876	0.281075	0.399785	0.273195	0.00865688	0.0235107	0.149081	0.762509	ETOH
FBgn0011883	tRNA:Ile-AAT-1-5	2R:9318790-9318863	+	Known	RARE	0.00358003	0.242116	0.610791	0.858153	0.983076	0.603278	0.705224	7.81094e-15	1	1	0.999999	1	NONE
FBgn0011884	tRNA:Ile-AAT-1-6	2R:9319282-9319355	+	Known	YES	2.22045e-16	1	1	0.232046	0.813008	0.428362	0.548373	0.0290427	0.497278	0.749516	0.999999	1	NONE
FBgn0011885	tRNA:Ile-AAT-1-7	2R:9319598-9319671	+	Known	RARE	0.0102281	0.0476547	0.239	0.716308	0.960381	0.811947	0.867907	0.0694033	0.725691	0.994381	0.562041	1	NONE
FBgn0011887	tRNA:Lys-CTT-1-4	2R:2053489-2053561	+	Known	RARE	0	1	1	0.282027	0.836697	0.334272	0.454963	0.200879	0.0275705	0.0659784	0.381119	1	BASELINE
FBgn0011888	tRNA:Lys-CTT-1-3	2R:2052381-2052453	-	Known	YES	0.0146231	0.0177576	0.123878	0.103541	0.721938	0.564784	0.67254	0.0184058	0.674312	0.942457	1	1	NONE
FBgn0011889	tRNA:Lys-CTT-1-2	2R:2050186-2050258	-	Known	YES	0.00246296	0.332077	0.708016	0.595584	0.941087	0.124012	0.212559	0	1	1	1	1	NONE
FBgn0011890	tRNA:Lys-CTT-1-5	2R:2059001-2059073	-	Known	YES	0	1	1	0.297215	0.843755	0.496313	0.612244	0.116177	1	1	0.10753	0.655724	ETOH
FBgn0011891	tRNA:Lys-CTT-1-1	2R:2029877-2029949	-	Known	YES	0	1	1	0.727606	0.962316	0.679315	0.76625	0.0656215	0.353251	0.572479	0.859604	1	NONE
FBgn0011892	tRNA:Lys-CTT-1-6	2R:2834313-2834385	-	Known	YES	2.07559e-09	0.99929	1	0.708085	0.958837	0.085023	0.157508	0.019952	0.639161	0.905483	1	1	NONE
FBgn0011893	tRNA:Lys-CTT-1-7	2R:2835243-2835315	-	Known	YES	2.22045e-16	1	1	0.497978	0.914748	0.00413202	0.0121386	0.0694736	0.541864	0.799783	0.673504	1	NONE
FBgn0011894	tRNA:Lys-CTT-1-8	2R:2835789-2835861	-	Known	YES	0.00445929	0.191632	0.544755	0.829244	0.978305	0.0808287	0.151327	0.272901	0.0118303	0.0310964	0.128131	0.712949	ETOH
FBgn0011895	tRNA:Lys-CTT-1-9	2R:2836638-2836710	-	Known	YES	0	1	1	0.654076	0.950458	0.00551768	0.0156947	0.128481	1	1	0.1124	0.66911	NONE
FBgn0011897	tRNA:Lys-CTT-1-11	2R:15690096-15690168	+	Known	RARE	3.33067e-16	1	1	0.265777	0.829235	0.107715	0.19003	0.146464	0.0955784	0.194057	0.538237	1	BASELINE
FBgn0011902	tRNA:Lys-TTT-1-1	2L:8290727-8290799	+	Known	RARE	0	1	1	0.186666	0.782809	0.780217	0.844194	0.0621332	1	1	0.390607	1	NONE
FBgn0011906	tRNA:Leu-CAG-1-1	2R:4570720-4570802	+	Known	RARE	0.0008842	0.561292	0.889316	0.540171	0.928286	0.233526	0.347721	0.0141906	0.737872	1	1	1	NONE
FBgn0011909	tRNA:Leu-CAA-2-1	2R:9318200-9318320	-	Known	YES	0.00953201	0.0559377	0.265415	0.895057	0.987109	0.0782396	0.147352	0.08856	0.498957	0.751372	0.549387	1	NONE
FBgn0011910	tRNA:Leu-CAA-1-1	2R:9320173-9320299	+	Known	YES	0.000693841	0.606847	0.915987	0.427989	0.891451	0.873785	0.913097	0.135056	1	1	0.0995823	0.63173	ETOH
FBgn0011915	tRNA:Met-CAT-1-1	2R:7540154-7540226	+	Known	RARE	8.88178e-16	1	1	0.519714	0.921725	0.708596	0.789486	0.0929239	0.050785	0.112447	1	1	NONE
FBgn0011916	tRNA:Met-CAT-1-2	2R:7548068-7548140	-	Known	YES	1.11022e-16	1	1	0.614953	0.944039	0.0212997	0.0503372	0.0925421	0.218758	0.389066	0.773278	1	NONE
FBgn0011921	tRNA:iMet-CAT-2-1	2R:5548730-5548801	+	Known	RARE	0.00556206	0.144643	0.468411	0.253313	0.823558	0.649	0.742081	0.0686859	0.999999	1	0.34248	1	NONE
FBgn0011927	tRNA:iMet-CAT-1-4	3L:14667042-14667113	-	Known	RARE	1.11022e-16	1	1	0.589204	0.940253	0.328596	0.449153	0.0937373	1	1	0.208832	0.889092	NONE
FBgn0011928	tRNA:iMet-CAT-1-5	3L:14667444-14667515	+	Known	YES	0	1	1	0.903014	0.988463	0.650007	0.742853	0.0191423	0.677742	0.946305	0.999999	1	NONE
FBgn0011931	tRNA:Asn-GTT-1-6	2R:2050024-2050097	+	Known	RARE	0	1	1	0.512459	0.919628	0.261752	0.378964	0	1	1	1	1	NONE
FBgn0011932	tRNA:Asn-GTT-1-5	2R:2049702-2049775	+	Known	YES	1.11022e-16	1	1	0.882222	0.985514	0.125082	0.213956	0.106961	0.0162889	0.0413099	1	1	NONE
FBgn0011933	tRNA:Asn-GTT-1-4	2R:2049528-2049601	-	Known	RARE	-2.22045e-16	1	1	0.174549	0.774654	0.728697	0.805163	0.00512828	0.903179	1	1	1	NONE
FBgn0011934	tRNA:Asn-GTT-1-8	2R:2077877-2077950	+	Known	YES	1.11022e-16	1	1	0.895346	0.987109	0.00208564	0.00654884	0.042481	0.338759	0.554467	1	1	NONE
FBgn0011935	tRNA:Asn-GTT-1-7	2R:2077634-2077707	-	Known	YES	0	1	1	0.344866	0.863961	2.93764e-07	1.49769e-06	0.0548141	0.504774	0.758258	0.826712	1	NONE
FBgn0011938	tRNA:Asn-GTT-1-1	2R:2040108-2040181	-	Known	RARE	0.000486587	0.666538	0.951208	0.657286	0.951133	0.788591	0.850755	0.0831021	0.999999	1	0.250477	0.961573	NONE
FBgn0011944	tRNA:Pro-TGG-1-1	3R:13443832-13443903	-	Known	RARE	-1.11022e-16	1	1	0.247489	0.820144	0.999095	0.999648	0.0935021	0.0435042	0.0982001	0.999999	1	NONE
FBgn0011945	tRNA:Pro-TGG-1-2	3R:13445683-13445754	+	Known	RARE	0	1	1	0.905284	0.98916	0.525532	0.638109	0.0602201	0.999999	1	0.464176	1	NONE
FBgn0011948	tRNA:Arg-TCG-3-1	X:13910236-13910308	+	Known	RARE	1.11022e-16	1	1	0.78969	0.971306	0.327145	0.447735	0.344887	7.55051e-08	5.46752e-07	0.999999	1	BOTH
FBgn0011949	tRNA:Arg-TCG-3-2	X:13910841-13910913	+	Known	RARE	2.33147e-15	1	1	0.94875	0.992718	0.476213	0.594154	0.186885	0.00160361	0.00519713	1	1	ETOH
FBgn0011950	tRNA:Arg-TCG-3-3	X:13911043-13911115	+	Known	RARE	0	1	1	0.0625944	0.685568	0.690925	0.775755	0.272784	0.267105	0.457928	0.0114832	0.197435	ETOH
FBgn0011951	tRNA:Arg-TCG-3-4	X:13911245-13911317	+	Known	RARE	0.00111633	0.513901	0.858123	0.000715208	0.450909	0.0439753	0.0924873	0.115659	0.0368274	0.0850529	1	1	BASELINE
FBgn0011952	tRNA:Arg-TCG-2-1	X:13908847-13908919	+	Known	RARE	0	1	1	0.7375	0.963859	0.739605	0.813942	0.0456579	0.319856	0.530042	1	1	NONE
FBgn0011953	tRNA:Arg-TCG-1-1	X:13997752-13997824	-	Known	RARE	0.000368243	0.707774	0.975273	0.680374	0.953856	0.8216	0.875266	0.134327	0.999999	1	0.074477	0.546029	ETOH
FBgn0011954	tRNA:Arg-TCG-2-2	X:21103118-21103190	+	Known	YES	-1.11022e-16	1	1	0.753612	0.966888	0.00154026	0.00498996	0.461994	7.45706e-14	1.11713e-12	1	1	BOTH
FBgn0011955	tRNA:Arg-ACG-1-5	2R:2066089-2066161	-	Known	YES	0	1	1	0.0883698	0.71091	0.116721	0.202831	0.116446	0.999999	1	0.106714	0.654043	NONE
FBgn0011956	tRNA:Arg-ACG-1-3	2R:2057112-2057184	+	Known	RARE	3.33067e-16	1	1	0.751356	0.966803	0.993094	0.995591	0.0592414	0.30221	0.506154	0.9695	1	NONE
FBgn0011957	tRNA:Arg-ACG-1-2	2R:2049040-2049112	+	Known	RARE	0	1	1	0.432646	0.892177	0.147311	0.243359	7.50836e-14	1	1	1	1	NONE
FBgn0011958	tRNA:Arg-ACG-1-1	2R:2029670-2029742	+	Known	RARE	-2.22045e-16	1	1	0.172803	0.772636	0.787204	0.849724	0.210316	0.999999	1	0.00332144	0.0885901	BASELINE
FBgn0011959	tRNA:Arg-ACG-1-10	3R:3966692-3966764	-	Known	YES	0	1	1	0.0343657	0.664932	0.567741	0.674982	0.312635	0.000259694	0.00101065	0.262994	0.981237	BOTH
FBgn0011960	tRNA:Arg-ACG-1-9	3R:3966449-3966521	-	Known	RARE	0.00197932	0.384627	0.756905	0.268349	0.829922	0.115061	0.200468	0.104159	0.0354308	0.0822239	1	1	NONE
FBgn0011961	tRNA:Arg-ACG-1-8	3R:3966198-3966270	-	Known	RARE	0.000545268	0.648279	0.941106	0.309404	0.847953	0.340816	0.461527	0.048379	1	1	0.504011	1	NONE
FBgn0011962	tRNA:Arg-ACG-1-7	3R:3965945-3966017	-	Known	YES	0.000746781	0.59344	0.908633	0.479913	0.909001	0.829162	0.880886	0.309329	0.200746	0.36256	0.00396318	0.0982334	BASELINE
FBgn0011963	tRNA:Arg-ACG-1-6	3R:3965673-3965745	-	Known	RARE	-2.22045e-16	1	1	0.974444	0.996693	0.805912	0.863963	0.0625603	1	1	0.387351	1	NONE
FBgn0011965	tRNA:Arg-TCG-4-1	3R:1213950-1214022	+	Known	RARE	0	1	1	0.802922	0.973721	0.630835	0.727967	0.0344327	0.422427	0.659744	0.999999	1	NONE
FBgn0011966	tRNA:Arg-TCG-2-3	3R:4687602-4687674	+	Known	RARE	-2.22045e-16	1	1	0.912238	0.989719	0.856327	0.900696	0.156708	0.502508	0.755598	0.16249	0.79588	BASELINE
FBgn0011970	tRNA:Ser-GCT-2-1	3R:6103776-6103857	-	Known	RARE	0.00280014	0.301002	0.677666	0.521693	0.922613	0.563753	0.67167	0.0391123	0.999999	1	0.589142	1	NONE
FBgn0011971	tRNA:Ser-GCT-2-2	3R:9870247-9870328	-	Known	YES	1.11022e-16	1	1	0.50137	0.916194	0.198729	0.307521	0.0940367	0.0367217	0.0848439	0.999999	1	NONE
FBgn0011974	tRNA:Ser-AGA-1-1	X:13964674-13964755	+	Known	YES	0.0011217	0.512889	0.857686	0.237187	0.813008	0.328721	0.449232	0.222123	0.00112698	0.00377955	0.743953	1	ETOH
FBgn0011975	tRNA:Ser-CGA-1-1	X:13909078-13909159	+	Known	YES	0.00129597	0.481823	0.83395	0.0644822	0.686923	0.158759	0.257837	0.0623458	0.200726	0.36256	1	1	NONE
FBgn0011976	tRNA:Ser-CGA-1-2	X:13909478-13909559	+	Known	YES	0.00018174	0.7923	1	0.838288	0.97981	0.700644	0.782995	0.00549354	0.896347	1	1	1	NONE
FBgn0011977	tRNA:Ser-CGA-1-3	X:13997396-13997477	-	Known	RARE	0.00483422	0.173931	0.518041	0.0268569	0.659914	0.700887	0.783109	0.0295176	0.490393	0.741105	1	1	NONE
FBgn0011980	tRNA:Ser-AGA-3-1	X:13919142-13919223	-	Known	YES	1.11022e-16	1	1	0.248809	0.821254	0.0585054	0.116552	0.176869	0.00123411	0.00410476	1	1	ETOH
FBgn0011981	tRNA:Ser-AGA-3-2	X:13998682-13998763	+	Known	YES	1.11022e-16	1	1	0.265479	0.829235	0.586282	0.690898	0.060632	0.173983	0.322202	1	1	NONE
FBgn0011982	tRNA:Ser-AGA-2-1	X:13919599-13919680	-	Known	YES	0	1	1	0.228577	0.812286	0.0214475	0.0506258	0.469042	5.98636e-07	3.77904e-06	0.0378863	0.38616	BOTH
FBgn0011983	tRNA:Ser-AGA-2-2	X:14011762-14011843	-	Known	RARE	0	1	1	0.34664	0.864632	0.194655	0.302585	0.0189808	0.65537	0.92225	1	1	NONE
FBgn0011985	tRNA:Ser-AGA-2-3	2L:3169582-3169663	+	Known	RARE	1.11022e-16	1	1	0.651346	0.949581	0.383732	0.50441	0.125615	0.148461	0.282128	0.599669	1	NONE
FBgn0011986	tRNA:Ser-AGA-2-5	3L:5335184-5335265	+	Known	RARE	1.11022e-16	1	1	0.386863	0.879237	0.62743	0.725268	0.0401481	1	1	0.579308	1	NONE
FBgn0011987	tRNA:SeC-TCA-1-1	2R:7245069-7245155	-	Known	YES	0.00124569	0.490456	0.841014	0.535663	0.926812	0.845338	0.892892	0.0775871	0.407177	0.641002	0.706534	1	NONE
FBgn0011993	tRNA:Thr-AGT-1-5	3R:13450287-13450360	-	Known	YES	0	1	1	0.55826	0.933393	0.228589	0.34218	0.157377	0.00508868	0.0145994	1	1	NONE
FBgn0011994	tRNA:Thr-AGT-1-6	3R:13450528-13450601	-	Known	YES	0.0033455	0.258188	0.629409	0.570791	0.935901	0.23247	0.346596	0.161429	0.879482	1	0.0758669	0.550854	BASELINE
FBgn0011998	tRNA:Val-CAC-2-2	3R:3277782-3277854	+	Known	RARE	0.000793585	0.582087	0.902165	0.0150202	0.640933	0.872579	0.912337	0.0470665	0.276289	0.470784	0.999999	1	NONE
FBgn0011999	tRNA:Val-CAC-2-1	3R:3277019-3277091	+	Known	RARE	0.000577598	0.638722	0.935837	0.231337	0.813008	0.0769232	0.145445	0.0464964	1	1	0.520772	1	ETOH
FBgn0012000	tRNA:Val-CAC-2-3	3R:3297782-3297854	-	Known	RARE	0	1	1	0.0295711	0.664932	0.0687446	0.132905	0.141813	1	1	0.049084	0.442059	ETOH
FBgn0012001	tRNA:Val-CAC-2-4	3R:3301625-3301697	-	Known	RARE	0.00282995	0.298439	0.675018	0.637412	0.9473	0.796869	0.856955	0	1	1	1	1	NONE
FBgn0012002	tRNA:Val-CAC-1-1	3R:13443483-13443555	+	Known	RARE	0.000510689	0.658887	0.94675	0.526383	0.923903	0.202774	0.312057	6.47716e-14	0.999999	1	0.999999	1	NONE
FBgn0012004	tRNA:Val-CAC-2-6	3R:15615844-15615916	+	Known	RARE	1.11022e-16	1	1	0.0281546	0.660983	0.100184	0.179675	0.250696	0.0945364	0.19222	0.0624101	0.499067	ETOH
FBgn0012009	tRNA:Val-AAC-2-4	3L:13426746-13426818	-	Known	RARE	0	1	1	0.677499	0.953166	0.143254	0.237889	0.116211	0.643843	0.910121	0.292846	1	ETOH
FBgn0012010	tRNA:Val-AAC-2-3	3L:13426148-13426220	+	Known	RARE	-2.22045e-16	1	1	0.249018	0.821465	0.375042	0.495718	0.0845339	0.999999	1	0.242376	0.949715	NONE
FBgn0012016	tRNA:Tyr-GTA-1-3	2L:2462593-2462686	+	Known	RARE	2.22045e-16	1	1	0.247516	0.820144	0.893696	0.927054	0.0888918	0.829652	1	0.375579	1	ETOH
FBgn0012017	tRNA:Tyr-GTA-1-2	2L:2459924-2460044	-	Known	RARE	0.00525696	0.156181	0.489135	0.408767	0.88475	0.477176	0.595067	0.0506224	1	1	0.484416	1	NONE
FBgn0012018	tRNA:Tyr-GTA-3-1	2L:7711476-7711661	+	Known	RARE	0	1	1	0.0331104	0.664932	0.976991	0.984896	0.0434165	0.514097	0.768742	0.921345	1	NONE
FBgn0012024	tRNA:Tyr-GTA-1-8	3R:4494803-4494896	-	Known	YES	0.0409719	6.46912e-05	0.00136667	0.775029	0.969554	0.0277694	0.0629034	0.118482	0.0449495	0.101013	0.955475	1	NONE
FBgn0012025	tRNA:Tyr-GTA-1-7	3R:4494334-4494427	-	Known	YES	-3.33067e-16	1	1	0.135235	0.748958	0.419569	0.539594	0.0364266	0.396607	0.627781	1	1	NONE
FBgn0012026	tRNA:Tyr-GTA-1-6	3R:4493838-4493930	-	Known	YES	0	1	1	0.794372	0.972179	0.966333	0.977679	0.192512	0.861114	1	0.032798	0.355403	NONE
FBgn0012027	tRNA:Tyr-GTA-1-5	3R:4468423-4468515	-	Known	YES	0	1	1	0.859396	0.983152	0.373242	0.493942	0.0615859	0.204917	0.368575	1	1	NONE
FBgn0012028	tRNA:Tyr-GTA-1-4	3R:4468055-4468147	-	Known	RARE	0.00129089	0.482684	0.834861	0.948697	0.992718	0.0792795	0.148909	0.0588231	0.176337	0.325822	1	1	NONE
FBgn0012034	AcCoAS	3L:21263822-21273343	-	Known	YES	0.0178574	0.00874495	0.0743953	0.580412	0.938062	0.182486	0.287659	0.546577	6.76558e-08	4.93752e-07	0.00361382	0.0928829	BOTH
FBgn0012036	Aldh	2L:9387389-9391567	+	Known	YES	0.0649662	4.14302e-07	1.58384e-05	0.606804	0.942617	3.21995e-07	1.63664e-06	0.605335	1.41711e-15	2.58918e-14	0.255106	0.968366	BOTH
FBgn0012037	Ance	2L:13905645-13909212	+	Known	YES	0.00630761	0.120256	0.421652	0.965847	0.995342	0.0280255	0.0634151	0.497015	5.39332e-12	6.51376e-11	0.56582	1	BOTH
FBgn0012042	AttA	2R:10634867-10635720	+	Known	YES	0.104145	9.33097e-11	7.52018e-09	0.878635	0.98537	0.00278535	0.00850293	0.653853	7.6279e-13	1.01686e-11	0.00253354	0.0741205	BOTH
FBgn0012051	CalpA	2R:15312618-15318069	+	Known	YES	0.00251542	0.326975	0.703371	0.409172	0.884775	0.277545	0.396024	0.73202	5.55015e-24	2.43879e-22	0.264738	0.983601	BOTH
FBgn0012058	Cdc27	3L:7238581-7242440	-	Known	YES	0.0120499	0.03151	0.182471	0.0769629	0.697403	0	0	0.246079	0.00267232	0.00818666	0.414706	1	BASELINE
FBgn0012344	Dh44	3R:5463904-5476428	+	Known	YES	7.84595e-05	0.862641	1	0.828205	0.978305	0.0115575	0.0298292	0.340225	1.08246e-07	7.66132e-07	0.999923	1	BASELINE
FBgn0013263	Trl	3L:14741029-14754149	-	Known	YES	0.00721773	0.0964337	0.369895	0.50475	0.917184	3.33067e-16	3.60914e-15	0.19331	0.00115988	0.00387708	1	1	ETOH
FBgn0013269	FK506-bp1	3R:11157306-11158855	-	Known	YES	5.12805e-05	0.888762	1	0.710548	0.959433	0	0	0.279339	6.24483e-06	3.34191e-05	1	1	BASELINE
FBgn0013272	Gp150	2R:18205167-18216921	+	Known	YES	0.0880458	3.03457e-09	1.87712e-07	0.829671	0.978305	0.233394	0.347555	0.464377	2.65909e-07	1.7731e-06	0.062906	0.500622	BOTH
FBgn0013275	Hsp70Aa	3R:7779885-7782266	-	Known	RARE	2.22045e-16	1	1	0.402476	0.881778	1.80977e-05	7.80546e-05	0.143691	0.00506122	0.0145305	1	1	NONE
FBgn0013276	Hsp70Ab	3R:7784257-7786631	+	Known	RARE	0.000588433	0.635592	0.934378	0.683847	0.953856	4.61169e-05	0.000189441	0.266409	1.50232e-05	7.52024e-05	1	1	BASELINE
FBgn0013277	Hsp70Ba	3R:8291175-8293498	-	Known	YES	0	1	1	0.066436	0.687533	0.855854	0.900447	0.838134	6.26322e-31	5.35681e-29	0.0235961	0.297296	BOTH
FBgn0013278	Hsp70Bb	3R:8331515-8333861	+	Known	YES	0	1	1	0.725947	0.962281	0.893385	0.926875	0.521699	1.05275e-08	8.50086e-08	0.0293442	0.334292	BOTH
FBgn0013279	Hsp70Bc	3R:8334798-8337183	+	Known	YES	0.00152053	0.446106	0.808017	0.617634	0.944352	0.560751	0.668949	0.392334	4.57928e-09	3.86432e-08	0.879265	1	BOTH
FBgn0013300	ProtA	2L:14879050-14881652	-	Known	YES	0.000133972	0.821136	1	0.546307	0.929962	0.103066	0.183632	0.0725646	0.341401	0.557506	0.809494	1	NONE
FBgn0013301	ProtB	2L:14882101-14883721	-	Known	YES	0.00443612	0.192793	0.546142	0.67828	0.953166	0.0256895	0.0589934	0	1	1	1	1	NONE
FBgn0013303	Nca	3L:19984987-19990668	+	Known	YES	0.00289708	0.292769	0.66867	0.366015	0.871333	0	0	0.182176	0.00019123	0.000767645	1	1	BASELINE
FBgn0013305	Nmda1	2R:8764599-8767735	-	Known	YES	0.0465392	2.00847e-05	0.000501027	0.121681	0.737503	0.00172585	0.00553367	0.374565	0.00146142	0.00478348	0.0202338	0.273651	BOTH
FBgn0013307	Odc1	2R:3892329-3894177	+	Known	YES	0.00722645	0.0962322	0.369594	0.28608	0.838383	4.14269e-12	3.023e-11	0.790596	2.00175e-18	4.90589e-17	5.54348e-06	0.000563201	BOTH
FBgn0013308	Odc2	2R:3894751-3896567	+	Known	YES	0.00807865	0.078556	0.32758	0.800474	0.973149	0.725752	0.802818	0.625517	1.5543e-18	3.84015e-17	0.586603	1	BOTH
FBgn0013323	Ptth	2L:575711-576896	-	Known	YES	0.0165706	0.0115762	0.0910856	0.575594	0.936742	0.00358347	0.0106702	0.56848	5.06135e-13	6.88406e-12	0.173561	0.820269	BOTH
FBgn0013325	RpL11	2R:15329847-15331330	+	Known	YES	0.000281871	0.742952	0.992789	0.810673	0.974625	6.69676e-06	3.01016e-05	0.039739	0.510473	0.764814	0.957215	1	ETOH
FBgn0013334	Sap47	3R:11760822-11787846	+	Known	YES	0.00631022	0.12018	0.421515	0.272745	0.830948	2.75675e-05	0.00011647	0.296542	0.00254827	0.00785185	0.152421	0.770656	BOTH
FBgn0013342	nSyb	3L:1630348-1637752	-	Known	YES	0.0151485	0.0158143	0.113852	0.113087	0.72805	8.11492e-08	4.33641e-07	0.225553	0.00987495	0.0264523	0.372285	1	BASELINE
FBgn0013343	Syx1A	3R:19927322-19931485	-	Known	YES	1.28933e-07	0.994404	1	0.808484	0.974124	0.123847	0.21232	0.0703349	0.184592	0.338243	1	1	NONE
FBgn0013347	TfIIA-S	3R:19716110-19716782	-	Known	YES	0.0126758	0.0273794	0.166144	0.0213363	0.655004	7.43968e-06	3.33086e-05	0.183059	0.0053747	0.0153359	0.816108	1	ETOH
FBgn0013348	TpnC41C	2R:952742-957715	-	Known	YES	0.00101252	0.53416	0.87136	0.45426	0.901585	0.768406	0.83503	0.372285	5.23251e-08	3.88034e-07	0.770695	1	BOTH
FBgn0013432	bcn92	X:2042496-2043680	-	Known	YES	0.0638106	5.28922e-07	1.96381e-05	0.754228	0.966888	3.66285e-12	2.69101e-11	0.192934	0.0302913	0.0716709	0.41898	1	NONE
FBgn0013433	beat-Ia	2L:16049965-16081684	+	Known	YES	0.000965934	0.543723	0.876665	0.364523	0.871333	1.44105e-05	6.27252e-05	0.188192	0.0532773	0.11713	0.357639	1	BASELINE
FBgn0013435	Cdc2rk	2R:5954722-5956207	-	Known	YES	0.00121701	0.495495	0.844108	0.0558379	0.683125	0	0	0.170729	0.00130935	0.00433139	0.999999	1	BASELINE
FBgn0013467	igl	2R:11042942-11077797	+	Known	YES	0.0135046	0.0227551	0.146516	0.73646	0.963859	0.126546	0.215788	0.539271	3.29953e-08	2.5136e-07	0.0077647	0.155326	BOTH
FBgn0013469	klu	3L:10974271-11002288	-	Known	YES	0.00781268	0.083664	0.34065	0.37115	0.873312	0.425476	0.545617	0.28467	4.09488e-06	2.27112e-05	1	1	BASELINE
FBgn0013531	MED20	2L:8071812-8072848	-	Known	YES	0.0615656	8.4977e-07	3.00213e-05	0.0905562	0.713473	2.22045e-16	2.42491e-15	0.284348	0.000408685	0.0015189	0.389458	1	BASELINE
FBgn0013548	l(2)dtl	2R:19590000-19592926	+	Known	YES	0.00180575	0.406329	0.773682	0.124564	0.739837	1.63156e-11	1.13381e-10	0.425671	3.35149e-06	1.88343e-05	0.0776135	0.55753	BOTH
FBgn0013563	Pex1	3L:14064992-14069223	+	Known	YES	6.04749e-05	0.87927	1	0.035099	0.666368	3.21965e-15	3.13509e-14	0.317556	0.00267038	0.00818223	0.0870792	0.590415	BASELINE
FBgn0013576	mtd	3R:1095838-1176165	-	Known	YES	0.00311014	0.275659	0.651397	0.155078	0.761777	9.32587e-15	8.67035e-14	0.316158	0.000318132	0.00121287	0.227051	0.923629	BOTH
FBgn0013717	not	3L:18611405-18615229	-	Known	YES	0.000126991	0.825783	1	0.0165369	0.643733	2.98873e-09	1.76729e-08	0.331567	0.000117741	0.000495358	0.231836	0.932208	BASELINE
FBgn0013718	nuf	3L:14183970-14226350	+	Known	YES	0.0003737	0.705716	0.974432	0.284289	0.837681	0	0	0.296844	0.000294114	0.00113004	0.344128	1	BASELINE
FBgn0013720	pck	X:1364699-1366358	+	Known	YES	0.00504754	0.164702	0.502689	0.0628334	0.685568	1.26213e-05	5.52962e-05	0.186189	0.0110119	0.0291485	0.651795	1	NONE
FBgn0013725	phyl	2R:10314841-10319842	-	Known	YES	0.00172159	0.417496	0.78283	0.787397	0.971306	0.00804757	0.021831	0.139766	0.144815	0.276571	0.496335	1	NONE
FBgn0013726	pnut	2R:4124776-4127802	+	Known	YES	0.00413157	0.208839	0.568589	0.342978	0.863763	3.33067e-14	2.94773e-13	0.27761	0.00326448	0.00981512	0.210306	0.891497	BASELINE
FBgn0013732	sced	2R:2544831-2548129	+	Known	YES	0.0102746	0.0471497	0.237368	0.147441	0.755434	0	0	0.310126	0.0157333	0.0400858	0.0383054	0.388818	BASELINE
FBgn0013733	shot	2R:9751742-9829615	-	Known	YES	0.00148854	0.450935	0.811819	0.0343151	0.664932	0	0	0.293203	0.00021874	0.000865537	0.402443	1	BASELINE
FBgn0013746	alien	2L:8993818-8997379	-	Known	YES	0.0045393	0.187686	0.538746	0.119037	0.735161	0	0	0.194469	0.000426469	0.00157887	1	1	BASELINE
FBgn0013749	Arf102F	4:1144793-1145951	+	Known	YES	0.00477331	0.176674	0.522888	0.0198245	0.650879	0	0	0.106112	0.0307375	0.0725646	1	1	BASELINE
FBgn0013750	Arf51F	2R:11210006-11212995	+	Known	YES	0.00051873	0.656383	0.945218	0.135711	0.749691	0	0	0.145669	0.0056656	0.0160893	1	1	BASELINE
FBgn0013751	Awh	3L:3846206-3861692	+	Known	YES	1.91572e-05	0.931872	1	0.739937	0.963937	8.3061e-09	4.76038e-08	0.254905	0.0181571	0.0455278	0.157269	0.783221	ETOH
FBgn0013753	Bgb	3L:1639711-1640952	+	Known	YES	0.000919213	0.553637	0.884148	0.0906643	0.713763	6.66134e-16	6.94437e-15	0.341771	1.9353e-05	9.49858e-05	0.334905	1	BASELINE
FBgn0013755	Bro	3L:1647869-1648612	+	Known	YES	0.00100006	0.536687	0.872641	0.824324	0.977949	0.021764	0.0512464	0.112273	1	1	0.11996	0.691169	NONE
FBgn0013756	Mtor	2R:7740122-7748707	+	Known	YES	0.00830481	0.0744754	0.317192	0.798107	0.972901	0	0	0.36911	1.42686e-06	8.49853e-06	0.40597	1	BOTH
FBgn0013759	CASK	3R:17609122-17648396	-	Known	YES	0.0027392	0.306328	0.683409	0.0733816	0.696501	0.0771047	0.145717	0.257383	3.90938e-06	2.17615e-05	1	1	BASELINE
FBgn0013762	Cdk5	2R:11457033-11458922	-	Known	YES	6.39101e-05	0.875916	1	0.141086	0.752083	5.73319e-13	4.48433e-12	0.285133	5.6922e-07	3.60352e-06	0.999999	1	BASELINE
FBgn0013763	Idgf6	2R:12578527-12581256	+	Known	YES	0.0868474	3.92514e-09	2.39705e-07	0.642825	0.947423	7.73967e-06	3.45963e-05	0.52803	4.84988e-15	8.27913e-14	0.98794	1	BOTH
FBgn0013764	Chi	2R:19919061-19921466	-	Known	YES	0.076753	3.39719e-08	1.63411e-06	0.0164745	0.643733	1.5783e-06	7.54075e-06	0.194083	0.00147665	0.00482955	0.955238	1	BASELINE
FBgn0013765	cnn	2R:9326819-9337980	-	Known	YES	0.131598	2.18512e-13	2.82859e-11	0.933777	0.991269	0	0	0.549553	2.30987e-15	4.12588e-14	0.801296	1	BOTH
FBgn0013767	Crz	3R:10140576-10141438	+	Known	YES	0.000760545	0.590055	0.906966	0.586954	0.939407	0.724605	0.801884	0.119637	0.0351142	0.0815852	1	1	NONE
FBgn0013770	Cp1	2R:9848180-9855486	+	Known	YES	0.0268632	0.00126802	0.0165743	0.56722	0.935667	2.76449e-07	1.41328e-06	0.383628	3.4703e-10	3.40201e-09	0.999999	1	BOTH
FBgn0013771	Cyp6a9	2R:10766861-10768877	-	Known	YES	0.028987	0.000808317	0.0113581	0.789318	0.971306	1.17954e-05	5.17794e-05	0.966788	1.90626e-64	9.13015e-61	0.0322563	0.352495	BOTH
FBgn0013772	Cyp6a8	2R:10774676-10776515	-	Known	YES	0.0343298	0.000261619	0.00448139	0.952165	0.99309	4.25768e-10	2.67429e-09	0.945785	2.75553e-47	1.28312e-44	3.03864e-05	0.00240843	BOTH
FBgn0013773	Cyp6a22	2R:10758871-10761210	+	Known	YES	0.0257844	0.00159473	0.0197366	0.307901	0.847953	0	0	0.369331	8.97914e-08	6.4353e-07	0.730251	1	BASELINE
FBgn0013799	Deaf1	3L:19811274-19823786	+	Known	YES	0.0203926	0.00505341	0.0493952	0.271863	0.830671	0.238566	0.353405	0.617817	1.29485e-16	2.63585e-15	0.306437	1	BOTH
FBgn0013809	Dhc16F	X:17958516-17972505	+	Known	YES	0.00610059	0.126535	0.433733	0.556396	0.933061	0.598992	0.701535	0.368333	1.01735e-11	1.19848e-10	1	1	BASELINE
FBgn0013810	Dhc36C	2L:17501401-17525515	+	Known	YES	0.000958238	0.545334	0.877905	0.529471	0.924885	0.00173674	0.00556382	0.714779	2.47918e-17	5.43976e-16	0.00473286	0.111667	BOTH
FBgn0013811	Dhc62B	3L:1759172-1771758	-	Known	YES	0.000674377	0.611938	0.919489	0.307514	0.847953	0.00982751	0.0259517	0.203269	0.000475263	0.0017365	1	1	BASELINE
FBgn0013812	Dhc93AB	3R:16850302-16868221	-	Known	YES	0.0281369	0.000967791	0.0131738	0.757441	0.967049	0	0	0.435063	1.45818e-07	1.01113e-06	0.184367	0.841679	BOTH
FBgn0013813	Dhc98D	3R:24312675-24345120	+	Known	YES	0.0148943	0.0167255	0.118528	0.236583	0.813008	0.000133472	0.000517881	0.663109	5.43826e-18	1.26793e-16	0.144916	0.753156	BOTH
FBgn0013949	Elal	3R:20691072-20693373	+	Known	YES	4.20908e-05	0.899162	1	0.284701	0.837832	0.000400684	0.00144853	0.391622	3.88335e-05	0.000180079	0.0770805	0.555758	BOTH
FBgn0013953	Esp	3R:20667657-20676134	+	Known	YES	0.00023984	0.762266	1	0.68871	0.954726	2.56316e-05	0.000108784	0.688036	3.70375e-12	4.55523e-11	6.27243e-05	0.00441798	BOTH
FBgn0013954	FK506-bp2	2R:15177614-15178467	+	Known	YES	0.00799714	0.0800849	0.33137	0.0286575	0.660983	2.92798e-07	1.49339e-06	0.557731	2.39874e-14	3.79889e-13	0.468299	1	BOTH
FBgn0013972	Gycalpha99B	3R:25508225-25511480	+	Known	YES	1.07782e-06	0.983822	1	0.674542	0.953166	0	0	0.278158	0.00276306	0.00843226	0.22275	0.915103	BASELINE
FBgn0013973	Gycbeta100B	3R:26960114-27004000	+	Known	YES	0.0330093	0.000345574	0.00565174	0.210883	0.799996	1.9007e-13	1.55755e-12	0.310287	0.0309695	0.0730281	0.0234139	0.296003	BASELINE
FBgn0013981	His4r	3R:10451477-10452336	+	Known	YES	0.0281498	0.000965156	0.013144	0.454278	0.901585	1.0534e-11	7.44691e-11	0.235744	4.7491e-05	0.000216352	1	1	ETOH
FBgn0013983	imd	2R:14297301-14301104	-	Known	YES	0.000724229	0.599075	0.911421	0.0278802	0.660983	6.05738e-13	4.73017e-12	0.331984	8.47515e-06	4.42734e-05	0.497285	1	BASELINE
FBgn0013984	InR	3R:17395970-17445043	-	Known	YES	0.00204191	0.377207	0.750379	0.510198	0.9188	0.237364	0.352012	0.183755	0.0292457	0.0694355	0.490634	1	BASELINE
FBgn0013987	MAPk-Ak2	X:5653941-5658236	-	Known	YES	0.018336	0.00788188	0.0691062	0.0832685	0.703964	4.61853e-13	3.65426e-12	0.293964	0.00486085	0.0140153	0.119539	0.689691	BASELINE
FBgn0013995	Calx	3R:16803905-16841335	+	Known	YES	0.000366079	0.708595	0.975729	0.412948	0.885813	8.24975e-10	5.08924e-09	0.426354	9.11094e-08	6.5214e-07	0.26188	0.979509	BASELINE
FBgn0013997	Nrx-IV	3L:12139619-12150090	+	Known	YES	0.120473	2.59357e-12	2.90818e-10	0.0949623	0.713763	3.88766e-08	2.12075e-07	0.339555	1.89761e-08	1.48613e-07	1	1	BASELINE
FBgn0014000	Hf	2L:19966727-19967685	-	Known	YES	0.0424161	4.77588e-05	0.00105481	0.0917875	0.713763	0.00146109	0.00475829	0.910097	2.33883e-44	7.68764e-42	0.0518758	0.453397	BOTH
FBgn0014001	Pak	3R:2176618-2187336	+	Known	YES	0.0145504	0.018045	0.125233	0.436662	0.893534	0	0	0.221727	7.76162e-05	0.000338789	1	1	BASELINE
FBgn0014002	Pdi	3L:15130838-15135940	-	Known	YES	0.00815971	0.0770666	0.324121	0.161715	0.767495	0.00379805	0.0112551	0.218988	0.000590105	0.00211463	0.883989	1	ETOH
FBgn0014006	Ask1	3R:15705441-15711752	+	Known	YES	0.000112398	0.835947	1	0.0810283	0.702676	0	0	0.174406	0.00113708	0.00380925	1	1	BASELINE
FBgn0014007	Ptp69D	3L:12728045-12734668	+	Known	YES	0.0207526	0.00467657	0.0465256	0.108002	0.723886	0	0	0.268816	0.0071596	0.0198167	0.180534	0.833485	BASELINE
FBgn0014009	Rab2	2R:2584244-2586974	+	Known	YES	5.11663e-09	0.998885	1	0.316175	0.851369	0	0	0	1	1	1	1	NONE
FBgn0014010	Rab5	2L:2359142-2365273	-	Known	YES	4.2504e-05	0.898671	1	0.29362	0.842637	0	0	0.246446	0.389836	0.619467	0.0181289	0.256363	BASELINE
FBgn0014011	Rac2	3L:7426749-7428290	-	Known	YES	0.0182271	0.00807031	0.0702456	0.0949114	0.713763	3.33326e-06	1.54136e-05	0.457959	2.21094e-08	1.71987e-07	0.183233	0.839588	BOTH
FBgn0014018	Rel	3R:4869905-4873699	-	Known	YES	0.0186029	0.0074386	0.0660122	0.369106	0.872693	0.444809	0.564299	0.557332	3.95583e-11	4.31728e-10	0.0646724	0.507317	BOTH
FBgn0014019	Rh5	2L:12008153-12009832	+	Known	YES	0.00112134	0.512956	0.857686	0.289335	0.840761	3.45355e-05	0.000144254	0.776343	2.63963e-23	1.07679e-21	0.0116158	0.198496	BOTH
FBgn0014020	Rho1	2R:11990192-11994734	+	Known	YES	0.00815557	0.0771419	0.324184	0.333548	0.85921	0	0	0.238719	0.000332694	0.00126245	0.796277	1	BASELINE
FBgn0014022	Rlb1	3R:5339049-5340549	+	Known	YES	0.022148	0.00346574	0.0368408	0.557267	0.933192	0	0	0.342543	2.87999e-07	1.91052e-06	0.842374	1	BASELINE
FBgn0014023	mRpL47	3R:5340544-5341630	-	Known	YES	0.0182831	0.00797287	0.0696874	0.579064	0.937581	2.10164e-09	1.25693e-08	0.214341	3.05254e-05	0.00014445	1	1	NONE
FBgn0014024	Rnp4F	X:5212961-5216729	-	Known	YES	0.00106232	0.524267	0.865087	0.0462143	0.677578	5.38815e-07	2.68375e-06	0.549576	1.50885e-11	1.73304e-10	0.117394	0.683665	BOTH
FBgn0014026	RpL7A	X:6424930-6427381	-	Known	YES	0.0102195	0.0477485	0.239186	0.550213	0.931015	0.172782	0.275512	0.155253	0.035927	0.0832487	0.67857	1	ETOH
FBgn0014028	SdhB	2R:2695131-2696677	+	Known	YES	0.00553143	0.145757	0.470201	0.398846	0.881742	0	0	0.322614	0.00160777	0.00520809	0.0978207	0.627201	BOTH
FBgn0014029	Sep2	3R:16411851-16414078	-	Known	YES	0.00940679	0.0575824	0.269896	0.18968	0.785822	5.01903e-10	3.13605e-09	0.16942	0.00239233	0.00742387	1	1	BASELINE
FBgn0014031	Spat	X:6422981-6424759	+	Known	YES	0.00101186	0.534293	0.87136	0.53822	0.927589	2.12294e-09	1.26877e-08	0.563023	1.15172e-11	1.34636e-10	0.080236	0.565023	BOTH
FBgn0014032	Sptr	X:8357329-8358471	-	Known	YES	0.000295459	0.737053	0.989654	0.00362193	0.591391	7.19702e-12	5.16189e-11	0.58409	1.85395e-14	2.96411e-13	0.256004	0.96989	BOTH
FBgn0014033	Sr-CI	2L:4121702-4124153	+	Known	YES	0.0569122	2.26681e-06	7.20372e-05	0.00501337	0.608945	0.504333	0.619211	0.718002	3.34749e-16	6.54792e-15	0.0010255	0.0399652	BOTH
FBgn0014037	Su(Tpl)	3L:19882220-19902510	-	Known	YES	0.00318171	0.270195	0.644308	0.229324	0.812532	0.264477	0.381944	0.394777	0.000496555	0.00180701	0.0186826	0.261001	BOTH
FBgn0014073	Tie	3L:4510698-4532145	-	Known	YES	0.0134926	0.0228155	0.146793	0.0713063	0.693855	0.000112325	0.000440109	0.243907	0.000227595	0.000896449	0.810054	1	BASELINE
FBgn0014075	Uggt	3L:18865847-18871345	+	Known	YES	0.00124866	0.489938	0.840616	0.364688	0.871333	0	0	0.27167	0.0468413	0.104696	0.0575397	0.478812	BASELINE
FBgn0014076	Vm32E	2L:11171167-11171665	-	Known	YES	0.00459552	0.18497	0.534703	0.114012	0.729095	0.000413215	0.00149013	0.425935	0.000390135	0.00145803	0.00619537	0.134126	BOTH
FBgn0014092	CG4278	2L:16327069-16328131	+	Known	YES	0.00595864	0.13105	0.442423	0.135185	0.748958	0	0	0.198987	0.000180762	0.000730647	0.999999	1	BASELINE
FBgn0014127	barr	2L:20058163-20061370	-	Known	YES	0.0220644	0.00352841	0.0373808	0.07437	0.696501	0	0	0.344163	9.01796e-06	4.68462e-05	0.396529	1	BASELINE
FBgn0014133	bif	X:11573003-11588773	+	Known	YES	0.00391706	0.221088	0.584944	0.619436	0.944431	4.79845e-06	2.18482e-05	0.316668	4.12198e-06	2.28464e-05	0.727452	1	BASELINE
FBgn0014135	bnl	3R:15619795-15662539	-	Known	YES	0.0542766	3.94824e-06	0.00011904	0.746217	0.965309	1.71767e-05	7.42352e-05	0.602172	2.2179e-16	4.4209e-15	0.415696	1	BOTH
FBgn0014141	cher	3R:12917255-12951111	-	Known	YES	0.000412635	0.691512	0.966214	0.293477	0.842637	8.19345e-14	6.95219e-13	0.355555	3.45459e-10	3.3876e-09	1	1	BOTH
FBgn0014143	croc	3L:21467233-21469579	-	Known	YES	0.0122998	0.0297884	0.175645	0.808792	0.974124	0.0165775	0.0406565	0.133795	1	1	0.108633	0.658884	BASELINE
FBgn0014163	fax	3L:16395896-16404928	-	Known	YES	0.000846293	0.569812	0.89499	0.00113823	0.508653	3.95906e-13	3.15107e-12	0.171747	0.0410325	0.0932866	0.517956	1	NONE
FBgn0014179	gcm	2L:9579498-9581745	-	Known	YES	0.00608497	0.127023	0.434743	0.837126	0.979363	0.665307	0.754625	0.272919	8.47097e-05	0.000367456	0.697021	1	ETOH
FBgn0014184	Oda	2R:8053800-8061769	-	Known	YES	0.00229112	0.349556	0.72569	0.126504	0.742673	0	0	0.234857	4.29705e-05	0.000197325	1	1	BASELINE
FBgn0014189	Hel25E	2L:5539326-5542314	-	Known	YES	0.00350679	0.247	0.616342	0.00735315	0.640933	0	0	0.352426	2.29883e-05	0.000111522	0.25543	0.969291	BASELINE
FBgn0014269	prod	2R:14856909-14858638	-	Known	YES	0.00806744	0.0787645	0.328205	0.00632461	0.640933	4.13953e-09	2.42426e-08	0.288556	3.26452e-05	0.000153441	0.695131	1	BASELINE
FBgn0014340	mof	X:5767873-5770886	-	Known	YES	2.27748e-05	0.925734	1	0.0437417	0.672871	0	0	0.222816	0.00175326	0.00562073	0.66296	1	BASELINE
FBgn0014342	mia	3R:1373837-1376890	-	Known	YES	0.0243826	0.00214953	0.0252071	0.688325	0.954726	0.956518	0.971151	0.669547	7.63616e-17	1.59314e-15	0.0488438	0.441252	BOTH
FBgn0014343	mirr	3L:12686739-12703349	+	Known	YES	0.00582358	0.135512	0.451128	0.150981	0.759899	2.0162e-09	1.20756e-08	0.149139	0.0149074	0.0382143	0.921192	1	NONE
FBgn0014366	noi	3R:1415323-1417181	-	Known	YES	0.00130317	0.480607	0.833548	0.165609	0.768518	0	0	0.128516	0.00850663	0.0231514	0.999999	1	BASELINE
FBgn0014368	nol	3L:11123935-11124502	+	Known	YES	1.43218e-06	0.981351	1	0.638254	0.947423	0.0292375	0.0657757	0.118744	0.998585	1	0.17355	0.820269	BASELINE
FBgn0014380	RhoL	3R:5322823-5328303	-	Known	YES	0.00203045	0.37855	0.751861	0.360243	0.87001	5.42114e-05	0.000220798	0.620817	1.66198e-10	1.68683e-09	0.00128291	0.0467016	BOTH
FBgn0014388	sty	3L:3401153-3424935	-	Known	YES	0.00426838	0.201444	0.558139	0.0126712	0.640933	0.00289395	0.00880319	0.370499	0.0244435	0.059295	0.00272912	0.0779501	BOTH
FBgn0014391	sun	X:15741892-15743291	-	Known	YES	0.022658	0.00310709	0.03391	0.606621	0.942617	0.047097	0.0977159	0.267229	0.000785636	0.00273265	0.428116	1	BASELINE
FBgn0014395	tilB	X:21851573-21853299	+	Known	YES	0.000474711	0.670391	0.953963	0.716764	0.960381	0.753919	0.824093	0.506437	1.02153e-15	1.90061e-14	0.999999	1	BOTH
FBgn0014396	tim	2L:3493986-3508119	-	Known	YES	0.0140172	0.0203058	0.135481	0.00261986	0.591391	0.132853	0.224453	0.595551	9.8681e-05	0.000422701	2.25773e-07	3.60451e-05	BOTH
FBgn0014411	Vps26	X:1767886-1770507	+	Known	YES	0.0230402	0.00286312	0.0316596	0.104158	0.721982	0	0	0.067889	0.124026	0.242187	1	1	BASELINE
FBgn0014417	CG13397	2L:8408888-8411868	-	Known	YES	0.0119329	0.0323512	0.185853	0.95295	0.993408	0	0	0.920315	6.19571e-52	5.19309e-49	0.615397	1	BOTH
FBgn0014427	CG11899	3R:25026176-25027492	+	Known	YES	0.000829844	0.573587	0.896994	0.763139	0.968365	0.000772332	0.00265437	0.618917	5.76603e-20	1.66509e-18	1	1	BOTH
FBgn0014454	Acp1	2L:7740562-7741537	-	Known	YES	0.000330087	0.72267	0.982518	0.490763	0.912726	0.0548459	0.110623	0.188358	0.000230657	0.000907231	1	1	NONE
FBgn0014455	Ahcy	X:15344294-15347200	+	Known	YES	0.000275875	0.745605	0.993903	0.35001	0.866072	0.00322124	0.00969323	0.241189	1.08504e-05	5.56498e-05	1	1	ETOH
FBgn0014464	Cp7Fa	X:8364921-8367120	+	Known	YES	0.00077514	0.586508	0.904959	0.761926	0.96799	3.58729e-05	0.000149598	0.282052	0.434048	0.674374	0.00419824	0.102665	BASELINE
FBgn0014465	Cp7Fb	X:8367870-8370104	+	Known	YES	0.000513273	0.65808	0.946239	0.951754	0.993003	0.000292804	0.00108223	0.32019	0.142181	0.272239	0.00382357	0.0962407	BASELINE
FBgn0014466	Cp7Fc	X:8371150-8372353	+	Known	YES	0.0065905	0.112225	0.405351	0.641904	0.947423	0.00511517	0.0146605	0.325484	0.154465	0.29181	0.00276729	0.0782196	BASELINE
FBgn0014469	Cyp4e2	2R:4332065-4334669	+	Known	YES	4.06576e-05	0.900885	1	0.865427	0.983665	1.19324e-08	6.75782e-08	0.882138	8.35377e-36	1.09405e-33	0.00518758	0.118316	BOTH
FBgn0014848	Eig71Eh	3L:15652036-15652541	-	Known	RARE	0.000104005	0.842107	1	0.248002	0.820684	0.752916	0.823475	0.019577	0.645398	0.911775	1	1	NONE
FBgn0014849	Eig71Ei	3L:15652807-15653451	+	Known	RARE	0.00711108	0.0989383	0.376174	0.785235	0.970803	0.316061	0.437208	0.181797	1	1	0.0143136	0.22326	NONE
FBgn0014850	Eig71Ej	3L:15653649-15654115	-	Known	RARE	6.65839e-06	0.959803	1	0.890841	0.985986	0.151423	0.24862	2.67848e-14	1	1	0.999999	1	NONE
FBgn0014857	His3.3A	2L:5055058-5056149	+	Known	YES	0.0440229	3.40761e-05	0.000793382	0.0120193	0.640933	0.00134077	0.00440217	0.134751	0.0175312	0.0441134	1	1	NONE
FBgn0014859	Hr38	2L:20683462-20714588	-	Known	YES	0.0155994	0.0143214	0.106135	0.757781	0.967068	3.42486e-09	2.01948e-08	0.38963	1.02612e-08	8.29979e-08	0.803841	1	BOTH
FBgn0014861	Mcm2	3R:4090692-4093646	+	Known	YES	0.00270779	0.309122	0.685944	0.0436178	0.672871	1.00069e-09	6.14047e-09	0.278743	0.000130443	0.00054314	0.582757	1	BASELINE
FBgn0014863	Mlp84B	3R:2939244-2943454	-	Known	YES	0.000509193	0.659356	0.946968	0.322726	0.854197	1.80498e-10	1.16115e-09	0.737817	9.47401e-19	2.39183e-17	0.00340719	0.0901601	BOTH
FBgn0014865	Mtk	2R:11296351-11296618	+	Known	YES	0.00726892	0.0952562	0.367123	0.520386	0.922181	1.52152e-07	7.94937e-07	0.514986	9.05164e-06	4.69993e-05	0.000958602	0.038003	BOTH
FBgn0014868	Ost48	X:9050962-9052548	-	Known	YES	0.0149222	0.0166233	0.118028	0.123205	0.7391	0.405264	0.525869	0.116667	0.0107571	0.0285304	1	1	NONE
FBgn0014869	Pglym78	3R:24973970-24975623	+	Known	YES	0.036312	0.000172344	0.00316213	0.178586	0.779239	3.03765e-07	1.54703e-06	0.42899	3.99414e-09	3.39619e-08	0.528398	1	BOTH
FBgn0014870	Psi	2R:12748826-12755219	-	Known	YES	0.0146572	0.0176241	0.123178	0.964846	0.995058	3.07268e-07	1.56415e-06	0.226712	0.043476	0.0981496	0.186524	0.845764	BASELINE
FBgn0014877	Roe1	2R:9441582-9443111	+	Known	YES	0.0102966	0.0469127	0.236523	0.0909676	0.713763	0	0	0.568871	1.52962e-10	1.56019e-09	0.023747	0.298078	BOTH
FBgn0014879	Set	3R:11089274-11090975	+	Known	YES	0.0100969	0.0491105	0.243497	0.0740372	0.696501	0	0	0.262413	4.21975e-05	0.00019412	0.903016	1	BASELINE
FBgn0014903	CG14630	X:925538-927198	+	Known	YES	0.000369692	0.707226	0.975246	0.355819	0.868645	6.50121e-11	4.31474e-10	0.73812	6.39675e-14	9.65618e-13	4.60799e-06	0.000485824	BOTH
FBgn0014906	Hydr2	2L:3163645-3169462	+	Known	YES	8.97286e-05	0.853212	1	0.50496	0.917222	8.88178e-16	9.16226e-15	0.704189	1.18215e-24	5.55668e-23	0.799903	1	BOTH
FBgn0014930	CG2846	3R:3737739-3739012	-	Known	YES	0.0555256	3.0355e-06	9.36259e-05	0.328274	0.856255	3.10862e-14	2.7607e-13	0.228674	9.81777e-05	0.000420814	1	1	NONE
FBgn0014931	CG2678	3R:3739573-3742272	+	Known	YES	0.0132629	0.0240136	0.151878	0.607676	0.942662	0	0	0.302927	2.3606e-05	0.00011432	0.611787	1	BASELINE
FBgn0014949	btn	3R:18411871-18412347	-	Known	RARE	4.02176e-06	0.968755	1	0.163213	0.767519	0.630173	0.727429	0.0640383	0.479391	0.727924	0.765205	1	NONE
FBgn0015000	betaggt-I	2L:4945579-4948324	+	Known	YES	0.000780265	0.585273	0.904523	0.0196999	0.650879	0	0	0.187729	0.00904517	0.0244839	0.675615	1	BASELINE
FBgn0015001	iotaTry	2R:7244225-7245042	+	Known	YES	0.0064185	0.117035	0.415308	0.642804	0.947423	4.23429e-06	1.93743e-05	0.689796	5.5434e-11	5.95875e-10	7.59312e-06	0.0007422	BOTH
FBgn0015008	Actn3	3R:12801607-12803517	-	Known	YES	0.0128451	0.0263614	0.161859	0.322717	0.854197	0.155906	0.254473	0.0433806	0.346091	0.563463	1	1	NONE
FBgn0015010	Ag5r	X:14678697-14680584	-	Known	YES	0.00905017	0.0625531	0.284793	0.889701	0.985986	5.19521e-08	2.80934e-07	0.761208	2.13803e-25	1.08609e-23	0.149559	0.763906	BOTH
FBgn0015011	AhcyL2	3R:12804161-12807880	-	Known	YES	0.00474819	0.17782	0.524516	0.233444	0.813008	0.000879298	0.00299133	0.455585	1.17989e-05	6.01646e-05	0.0146781	0.226216	BOTH
FBgn0015019	CCT3	3R:12473327-12475700	+	Known	YES	7.01412e-05	0.870058	1	0.157011	0.762718	2.16784e-11	1.49163e-10	0.195313	0.00216425	0.00679218	0.874023	1	NONE
FBgn0015024	CkIalpha	X:12547659-12551867	+	Known	YES	0.00435326	0.197011	0.551488	0.199534	0.790675	0	0	0.126186	0.883235	1	0.173421	0.819953	NONE
FBgn0015025	CkIIalpha-i1	3L:15810079-15811721	+	Known	YES	0.0896926	2.12991e-09	1.368e-07	0.500278	0.915961	0	0	0.559844	1.7366e-13	2.49349e-12	0.291973	1	BOTH
FBgn0015031	cype	2L:5327227-5327969	+	Known	YES	0.00657174	0.112739	0.4063	0.347895	0.86503	0.00177791	0.00568326	0.30268	0.00711315	0.0197044	0.0776639	0.557599	BOTH
FBgn0015032	Cyp4c3	3R:26719760-26726410	+	Known	YES	0.000161125	0.804181	1	0.642702	0.947423	0.235488	0.350037	0.563011	1.71879e-13	2.47109e-12	0.268974	0.991609	BOTH
FBgn0015033	Cyp4d8	3L:7486657-7489279	-	Known	YES	0.0133831	0.0233788	0.1491	0.947002	0.992718	3.04201e-14	2.7044e-13	0.813254	5.62052e-28	3.62383e-26	0.0246135	0.304717	BOTH
FBgn0015034	Cyp4e1	2R:4334956-4337250	+	Known	YES	0.0260231	0.0015158	0.0190409	0.000672338	0.441845	0.0194831	0.0466825	0.698935	6.98049e-22	2.46872e-20	0.323515	1	BOTH
FBgn0015035	Cyp4e3	2L:9747839-9750071	-	Known	YES	1.9412e-06	0.97829	1	0.0558313	0.683125	1.42109e-14	1.30063e-13	0.847137	5.81907e-24	2.54031e-22	1.62113e-06	0.000209852	BOTH
FBgn0015036	Cyp4ae1	X:2073040-2075031	+	Known	YES	3.78394e-05	0.904364	1	0.143675	0.754338	4.42313e-13	3.5038e-12	0.494507	1.87059e-08	1.46668e-07	0.0643135	0.505685	BOTH
FBgn0015037	Cyp4p1	2R:5127546-5129644	+	Known	YES	0.177405	6.04792e-18	1.46934e-15	0.0179797	0.643763	0.00576196	0.0163106	0.933356	9.28403e-54	9.72705e-51	0.294656	1	BOTH
FBgn0015038	Cyp9b1	2R:3015343-3017313	-	Known	YES	0.0124505	0.0287972	0.171611	0.830107	0.978305	0.833408	0.883828	0.822052	4.38332e-35	5.44295e-33	0.663594	1	BOTH
FBgn0015039	Cyp9b2	2R:3017782-3019644	-	Known	YES	0.112788	1.41005e-11	1.36632e-09	0.864252	0.983665	4.09172e-08	2.22699e-07	0.752318	4.70698e-27	2.76377e-25	0.485175	1	BOTH
FBgn0015040	Cyp9c1	2R:20518586-20520446	+	Known	YES	0.000470423	0.671796	0.954458	0.630718	0.946497	0.76967	0.835993	0.781677	1.72801e-27	1.06695e-25	0.165572	0.801258	BOTH
FBgn0015075	Ddx1	3L:22256469-22259117	+	Known	YES	0.106998	5.00953e-11	4.37381e-09	0.122411	0.738031	0.000392672	0.00142202	0.278045	0.000863135	0.00296925	0.343448	1	BASELINE
FBgn0015218	eIF4E1	3L:9392718-9395560	-	Known	YES	0.00623433	0.122439	0.426007	2.62143e-07	0.00292866	0	0	0.236455	0.0156101	0.0398023	0.251622	0.963358	BASELINE
FBgn0015221	Fer2LCH	3R:26213526-26216306	+	Known	YES	0.0372303	0.000142063	0.00267363	0.538559	0.927848	0.525998	0.638503	0.499078	7.99904e-14	1.19458e-12	0.999999	1	BOTH
FBgn0015222	Fer1HCH	3R:26211295-26213900	-	Known	YES	0.0203244	0.00512823	0.0498812	0.550216	0.931015	0.000460787	0.00164927	0.609657	7.3708e-22	2.59308e-20	1	1	BOTH
FBgn0015229	glec	3R:17676416-17681988	-	Known	YES	0.00899318	0.0633888	0.287233	0.311147	0.848487	4.02439e-09	2.35972e-08	0.426911	6.98788e-08	5.08757e-07	0.278469	1	BOTH
FBgn0015230	Glut3	3R:12614033-12615743	+	Known	YES	8.29758e-06	0.955132	1	0.286305	0.838634	0.29047	0.410102	0.0362888	1	1	0.616327	1	NONE
FBgn0015239	Hr78	3L:21487119-21490594	-	Known	YES	0.0106173	0.0435956	0.225839	0.470963	0.905103	0	0	0.227008	4.73776e-05	0.000215937	1	1	BASELINE
FBgn0015240	Hr96	3R:20850957-20855073	+	Known	YES	0.00614659	0.125109	0.431378	0.902041	0.988398	0	0	0.50588	2.101e-11	2.36853e-10	0.357998	1	BASELINE
FBgn0015245	Hsp60A	X:11002515-11006341	+	Known	YES	0.0145288	0.0181316	0.125651	0.192337	0.7882	0.896875	0.929234	0.244092	1.18721e-05	6.05011e-05	0.999999	1	ETOH
FBgn0015247	Diap2	2R:11819675-11822330	-	Known	YES	0.00377813	0.229479	0.594708	0.521076	0.92248	2.08859e-08	1.15896e-07	0.231985	1.68479e-05	8.36087e-05	0.999999	1	NONE
FBgn0015268	Nap1	2R:19792698-19794817	-	Known	YES	0.00169181	0.421556	0.786431	0.749117	0.966041	0	0	0.403517	1.94543e-11	2.19981e-10	0.999999	1	BOTH
FBgn0015269	Nf1	3R:21808735-21821459	+	Known	YES	0.00164031	0.428718	0.793135	0.610123	0.943101	4.76392e-07	2.38488e-06	0.161931	0.0322116	0.0756274	0.645044	1	NONE
FBgn0015270	Orc2	3R:9790607-9792797	+	Known	YES	0.00932177	0.0587282	0.273584	0.0364408	0.667923	0	0	0.330723	0.000114476	0.000483136	0.238441	0.943396	BASELINE
FBgn0015271	Orc5	2L:13829837-13831576	+	Known	YES	0.0154483	0.014805	0.108737	0.147444	0.755434	0	0	0.350568	5.36329e-05	0.000241752	0.199815	0.872974	BASELINE
FBgn0015277	Pi3K59F	2R:19448015-19451568	+	Known	YES	0.00747369	0.0906988	0.356354	0.292479	0.841849	0.200512	0.309551	0.356675	8.62584e-09	7.02791e-08	1	1	BOTH
FBgn0015278	Pi3K68D	3L:11767750-11783113	-	Known	YES	0.00407873	0.21178	0.572289	0.689483	0.954726	0	0	0.323799	2.93145e-06	1.66468e-05	0.707121	1	BASELINE
FBgn0015279	Pi3K92E	3R:16454694-16460454	-	Known	YES	0.00169759	0.420764	0.785907	0.582944	0.938062	4.44089e-15	4.25017e-14	0.44088	0.000400244	0.00149083	0.00308348	0.0839802	BOTH
FBgn0015282	Rpt2	3R:19755595-19757280	-	Known	YES	0.00970404	0.0537587	0.258775	0.0799598	0.700819	7.72604e-12	5.52477e-11	0.267931	0.00016061	0.000654841	0.645927	1	BASELINE
FBgn0015283	Rpn10	3L:21530100-21531682	+	Known	YES	0.00171861	0.417899	0.783105	0.0377976	0.669852	0	0	0.193467	0.000488165	0.00177957	1	1	BASELINE
FBgn0015286	Rala	X:3598643-3613668	-	Known	YES	4.3743e-05	0.897213	1	0.227592	0.81166	0	0	0.127274	0.0127565	0.0332985	1	1	BASELINE
FBgn0015288	RpL22	X:656593-659163	-	Known	YES	0.00962236	0.0547818	0.262143	0.574874	0.936742	0.903004	0.933417	0.0705195	0.107128	0.213694	1	1	ETOH
FBgn0015295	Shark	2R:12086931-12090389	-	Known	YES	0.0106086	0.0436824	0.226167	0.127069	0.743754	2.44249e-15	2.41198e-14	0.411291	1.36582e-05	6.89528e-05	0.0668869	0.516947	BOTH
FBgn0015296	Shc	3L:9420110-9421771	+	Known	YES	0.0317883	0.000447115	0.00696257	0.0188165	0.645654	1.93122e-08	1.07502e-07	0.226791	0.000222781	0.000879261	0.975236	1	BASELINE
FBgn0015298	Srp19	3L:7340410-7341134	-	Known	YES	0.000508626	0.659534	0.94699	0.492063	0.913152	9.44044e-07	4.60495e-06	0.1442	0.0236266	0.0575675	0.867362	1	BASELINE
FBgn0015299	Ssb-c31a	2L:8211347-8211938	+	Known	YES	0.00470577	0.179774	0.5272	0.0179937	0.643763	0	0	0.191594	0.00349302	0.0104163	0.819702	1	BASELINE
FBgn0015300	Ssl	2R:20386766-20387790	-	Known	YES	0.00143367	0.459408	0.81838	0.739156	0.963859	0.0122196	0.0312947	0	1	1	1	1	NONE
FBgn0015316	Try29F	2L:8998537-8999816	+	Known	YES	2.91223e-05	0.916054	1	0.270804	0.830468	0.0134925	0.0340702	0.70423	1.43418e-12	1.85509e-11	2.38434e-05	0.00198362	BOTH
FBgn0015320	Ubc2	2L:10765010-10768006	-	Known	YES	0.00020674	0.778822	1	0.0149748	0.640933	4.19886e-13	3.33402e-12	0.3375	0.00162211	0.00524847	0.0640882	0.504808	BASELINE
FBgn0015321	Ubc4	3L:9691436-9693581	+	Known	YES	1.44491e-06	0.981269	1	0.0190113	0.645654	2.22045e-16	2.42491e-15	0.227265	0.000713596	0.00250626	0.77475	1	BASELINE
FBgn0015323	VAChT	3R:14531223-14544638	+	Known	YES	0.00530534	0.154284	0.485494	0.0833799	0.703964	7.45048e-08	3.98771e-07	0.239529	0.00835598	0.022782	0.308509	1	BASELINE
FBgn0015324	Vha26	3R:1417485-1421078	+	Known	YES	0.00171266	0.418708	0.783818	0.627281	0.945461	0	0	0.27452	0.00649856	0.0182232	0.165919	0.801652	BOTH
FBgn0015331	abs	3R:58769-60763	+	Known	YES	6.34466e-07	0.987587	1	0.309028	0.847953	1.4988e-13	1.24065e-12	0.0416371	0.920032	1	0.679726	1	BASELINE
FBgn0015336	CG15865	X:16554931-16558488	-	Known	YES	0.00893503	0.0642535	0.289586	0.886876	0.985863	0.971621	0.981204	0.689124	4.08258e-14	6.31932e-13	0.000876124	0.0357781	BOTH
FBgn0015338	CG5861	2L:16305801-16307298	-	Known	YES	0.000823166	0.575134	0.89778	0.0334613	0.664932	0	0	0.18362	0.0013314	0.00439565	1	1	BASELINE
FBgn0015351	CG14906	3R:12475703-12476879	-	Known	YES	4.31024e-05	0.897964	1	0.367401	0.872328	2.16489e-11	1.49021e-10	0.412289	0.00136597	0.00449922	0.00466259	0.110319	BOTH
FBgn0015359	CG2034	3L:2257456-2258922	+	Known	YES	0.00348586	0.248418	0.617948	0.0228353	0.655419	2.07919e-08	1.15412e-07	0.228514	0.015125	0.0387066	0.297725	1	BASELINE
FBgn0015360	oxt	3L:2258839-2262664	-	Known	YES	5.36889e-05	0.886197	1	0.0237424	0.655419	1.109e-09	6.76914e-09	0.310788	0.000395907	0.00147676	0.235279	0.937657	BASELINE
FBgn0015371	chn	2R:11002741-11032288	+	Known	YES	0.00577449	0.137176	0.454098	0.0744352	0.696501	4.88498e-15	4.65922e-14	0.388062	3.81261e-06	2.12476e-05	0.205028	0.882296	BOTH
FBgn0015372	RabX1	2R:19407362-19411136	-	Known	YES	3.3939e-05	0.909405	1	0.459839	0.902921	4.28513e-12	3.1215e-11	0.248692	0.511057	0.765433	0.0116443	0.198676	BASELINE
FBgn0015374	crl	X:16487710-16489900	+	Known	YES	0.0151885	0.0156756	0.113145	0.0418362	0.672871	3.46375e-08	1.89629e-07	0.117191	0.0140798	0.0363315	1	1	NONE
FBgn0015376	cutlet	2L:3707230-3711748	-	Known	YES	0.00010601	0.840613	1	0.563125	0.934931	0	0	0.385784	2.68944e-06	1.53715e-05	0.241534	0.948689	BOTH
FBgn0015379	dod	X:21216385-21217885	+	Known	YES	0.0182539	0.0080235	0.0699802	0.0271777	0.660983	9.12004e-12	6.48149e-11	0.23361	0.000500427	0.00181963	0.775976	1	BASELINE
FBgn0015380	drl	2L:19190342-19208621	+	Known	YES	0.00528445	0.1551	0.48735	0.0421653	0.672871	2.22045e-14	2.00216e-13	0.369136	0.000519766	0.0018835	0.0442676	0.421038	BASELINE
FBgn0015381	dsf	2L:5925937-5939261	+	Known	RARE	0.00308651	0.277493	0.652878	0.0545397	0.683125	0.0377091	0.0813136	0.203768	0.0272037	0.0652075	0.364655	1	ETOH
FBgn0015391	glu	2L:16733617-16738388	-	Known	YES	0.00910097	0.0618182	0.282753	9.59902e-05	0.203016	0	0	0.273001	0.00155511	0.00505999	0.308083	1	BASELINE
FBgn0015393	hoip	2L:9699791-9700459	+	Known	YES	0.00145473	0.456126	0.815819	0.231851	0.813008	3.66783e-09	2.15744e-08	0.400451	3.82468e-07	2.49135e-06	0.309922	1	BOTH
FBgn0015396	jumu	3R:6175904-6187334	+	Known	YES	0.0116228	0.0346961	0.194988	0.19682	0.78961	0	0	0.309525	0.000485776	0.00177163	0.224144	0.918524	BASELINE
FBgn0015399	kek1	2L:12817000-12822787	-	Known	YES	5.96157e-05	0.880124	1	0.125223	0.740514	0.173192	0.276012	0.657682	4.50144e-12	5.49199e-11	0.000734422	0.0313269	BOTH
FBgn0015400	kek2	2L:11581937-11626883	+	Known	YES	0.0442743	3.23229e-05	0.000756767	0.103341	0.72173	8.85003e-10	5.44852e-09	0.466503	1.28259e-05	6.50552e-05	0.00881458	0.168583	BOTH
FBgn0015402	ksr	3R:1304112-1309628	-	Known	YES	0.000592907	0.63431	0.933561	0.186656	0.782809	1.87916e-12	1.41279e-11	0.241228	2.52082e-05	0.000121291	1	1	BASELINE
FBgn0015477	Rme-8	2R:5055268-5064766	-	Known	YES	0.00198016	0.384527	0.756893	0.295467	0.84329	0	0	0.272073	0.00199247	0.00630321	0.286568	1	BASELINE
FBgn0015509	Cul1	2R:3804361-3809084	+	Known	YES	0.000289871	0.73946	0.990601	0.184747	0.782091	0	0	0.278488	0.00110978	0.00372709	0.312577	1	BASELINE
FBgn0015513	mbc	3R:19607487-19627356	+	Known	YES	7.01931e-05	0.870011	1	0.425918	0.890892	7.77156e-16	8.07163e-15	0.361018	3.82662e-05	0.000177571	0.176365	0.825783	BOTH
FBgn0015519	nAChRalpha3	X:8170233-8261202	-	Known	YES	0.0105211	0.0445636	0.228873	0.209856	0.799683	3.17276e-10	2.00903e-09	0.321969	0.0130143	0.0338792	0.0297714	0.337206	BASELINE
FBgn0015520	nonA-l	3R:12465927-12468834	+	Known	YES	0.0261886	0.00146341	0.0185216	0.361832	0.870219	8.471e-13	6.52226e-12	0.323231	1.22677e-05	6.23935e-05	0.523812	1	BASELINE
FBgn0015521	RpS21	2L:2856070-2857029	+	Known	YES	0.00340264	0.254154	0.624744	0.516856	0.921321	0.418346	0.538555	0.207857	0.000461214	0.00169144	1	1	ETOH
FBgn0015522	olf186-M	2R:13734204-13735949	+	Known	YES	0.000169223	0.799423	1	0.451846	0.90035	0	0	0.645313	2.49057e-19	6.67478e-18	0.503365	1	BOTH
FBgn0015524	otp	2R:16771130-16790919	-	Known	YES	0.0066981	0.109327	0.399455	0.00922518	0.640933	4.64615e-11	3.1194e-10	0.133224	0.423016	0.660521	0.299722	1	BASELINE
FBgn0015527	peng	X:21217530-21220870	-	Known	YES	0.00942777	0.0573034	0.269208	0.720767	0.961395	3.10962e-12	2.29919e-11	0.394921	1.16505e-10	1.20446e-09	1	1	BOTH
FBgn0015541	sda	3R:22741483-22771031	+	Known	YES	0.0181655	0.00817888	0.0708774	0.149619	0.758404	5.24471e-10	3.27279e-09	0.581387	4.08545e-13	5.59987e-12	0.120836	0.693907	BOTH
FBgn0015543	snoRNA:Me28S-A1322	2R:7780628-7780700	+	Known	YES	0.000557437	0.644642	0.939094	0.635099	0.946814	0.0636681	0.124775	0.194696	0.0976231	0.197598	0.23323	0.935234	ETOH
FBgn0015544	spag	2R:20046907-20049026	+	Known	YES	0.00139626	0.46533	0.822942	0.0671906	0.688197	0	0	0.291671	0.0225217	0.055168	0.0529116	0.457062	BASELINE
FBgn0015546	spel1	2L:14362069-14366840	+	Known	YES	0.00201681	0.380157	0.753265	0.0278843	0.660983	0	0	0.304885	9.59883e-05	0.000412167	0.416459	1	BASELINE
FBgn0015550	tap	3L:17352782-17354911	+	Known	YES	0.00341958	0.252974	0.623478	0.424799	0.890729	0.126102	0.215273	0.147141	0.00888394	0.0240766	1	1	BASELINE
FBgn0015553	tos	2L:18679631-18682075	-	Known	YES	0.00423997	0.202954	0.56028	0.0829669	0.703445	0	0	0.315552	0.0018361	0.00585667	0.110564	0.663839	BASELINE
FBgn0015558	tty	X:21199640-21210703	-	Known	YES	0.0700899	1.40001e-07	6.00232e-06	0.0937728	0.713763	0.00325036	0.00976944	0.571567	2.62522e-12	3.294e-11	0.0957949	0.621254	BOTH
FBgn0015561	unpg	2R:5082710-5087375	+	Known	YES	0.0268117	0.00128196	0.0166913	0.473905	0.906349	0.000186604	0.000709898	0.117982	0.0617894	0.133364	0.883515	1	NONE
FBgn0015568	alpha-Est1	3R:3371455-3374846	-	Known	YES	0.131504	2.23155e-13	2.87758e-11	0.259038	0.826042	4.62057e-05	0.00018976	0.823815	3.68331e-12	4.53176e-11	4.10264e-15	2.80713e-12	BOTH
FBgn0015569	alpha-Est10	3R:3312305-3319567	-	Known	YES	0.000825543	0.574583	0.897558	0.411892	0.885619	0.0835291	0.155264	0.852157	2.29658e-29	1.68854e-27	0.000907312	0.0366499	BOTH
FBgn0015570	alpha-Est2	3R:3367532-3370952	+	Known	YES	0.0297311	0.000690563	0.00997522	0.392211	0.881742	0.634896	0.731018	0.782867	4.74226e-18	1.11184e-16	9.5434e-06	0.000908982	BOTH
FBgn0015571	alpha-Est3	3R:3364694-3367353	-	Known	YES	0.0868628	3.91217e-09	2.39349e-07	0.710878	0.959433	0.128002	0.21784	0.501121	4.1048e-16	7.95501e-15	1	1	BOTH
FBgn0015572	alpha-Est4	3R:3362409-3364337	-	Known	YES	0.00493215	0.169623	0.511233	0.285879	0.838383	0.967755	0.978765	0.378313	0.000444626	0.00163669	0.0356303	0.373452	BOTH
FBgn0015574	alpha-Est6	3R:3350289-3354499	-	Known	YES	0.0473511	1.69349e-05	0.000432098	0.161862	0.767515	0.00662547	0.0184404	0.229653	3.48605e-06	1.95283e-05	1	1	BASELINE
FBgn0015575	alpha-Est7	3R:3345285-3349475	-	Known	YES	0.0282329	0.000948317	0.0129455	0.391489	0.881643	0.663839	0.753624	0.743185	0.00045923	0.0016849	2.69267e-18	2.57935e-15	BOTH
FBgn0015576	alpha-Est8	3R:3335065-3341392	-	Known	YES	0.0170398	0.010449	0.0844964	0.195083	0.788782	3.86929e-05	0.000160678	0.663924	1.56736e-13	2.26017e-12	0.00283655	0.079516	BOTH
FBgn0015577	alpha-Est9	3R:3319643-3330820	-	Known	YES	0.0101803	0.0481798	0.240568	0.00457693	0.608945	0	0	0.540444	3.91664e-12	4.80297e-11	0.227664	0.923981	BOTH
FBgn0015582	dare	2R:7178499-7180679	-	Known	YES	0.000702306	0.60466	0.914335	0.592359	0.940253	8.21565e-15	7.67221e-14	0.27019	7.10587e-07	4.43895e-06	1	1	BASELINE
FBgn0015583	Acp29AB	2L:8392456-8393222	-	Known	YES	0.0035456	0.244397	0.613362	0.617722	0.944352	0.00198405	0.00626802	0.0515752	0.247068	0.430219	1	1	NONE
FBgn0015584	Acp53Ea	2R:12637308-12637840	-	Known	YES	0.00122797	0.493559	0.842843	0.212261	0.801582	0.00343231	0.0102693	6.77303e-14	0.999999	1	1	1	NONE
FBgn0015585	Acp63F	3L:3815839-3816354	-	Known	YES	0.00910262	0.0617944	0.282683	0.920776	0.990437	0.0822309	0.153421	0.0213198	1	1	0.768529	1	NONE
FBgn0015586	Acp76A	3L:19043857-19045126	-	Known	YES	0.00396237	0.218431	0.580994	0.361505	0.870219	0.000135453	0.000525263	0.0879931	0.059539	0.129126	1	1	NONE
FBgn0015589	Apc	3R:24658023-24670470	-	Known	YES	4.59796e-05	0.894632	1	0.515932	0.921048	1.74118e-11	1.20798e-10	0.423386	2.32052e-11	2.60288e-10	1	1	BOTH
FBgn0015591	AstA	3R:20586252-20590793	-	Known	YES	8.21476e-06	0.955356	1	0.915045	0.990269	0.0369583	0.0800036	0.399844	0.000277807	0.00107416	0.0217954	0.285632	BOTH
FBgn0015600	toc	2L:3068345-3144786	-	Known	YES	0.0416485	5.61177e-05	0.00121072	0.566764	0.935608	0.000309947	0.00114156	0.394852	6.21517e-07	3.91316e-06	0.304899	1	BOTH
FBgn0015602	BEAF-32	2R:10657974-10660135	+	Known	YES	0.00670105	0.109248	0.399236	0.0372019	0.669831	0	0	0.301865	0.000265422	0.00103019	0.323471	1	BASELINE
FBgn0015609	CadN	2L:17647053-17778340	-	Known	YES	9.78862e-05	0.846763	1	0.00364545	0.591391	2.28817e-13	1.86187e-12	0.40425	0.00083249	0.00287504	0.0092972	0.174962	BASELINE
FBgn0015614	CanB2	2R:3673515-3676558	+	Known	YES	0.00694405	0.103004	0.385126	0.140534	0.751583	0	0	0.156312	0.0749299	0.157404	0.514988	1	BASELINE
FBgn0015615	SMC3	X:16483029-16487472	-	Known	YES	0.000416609	0.690107	0.965539	0.173801	0.773321	0	0	0.249045	0.000418999	0.00155327	0.665584	1	BASELINE
FBgn0015618	Cdk8	3L:9830180-9831770	-	Known	YES	0.0119681	0.0320956	0.184726	0.0256781	0.655419	0	0	0.132462	0.00755127	0.0207875	1	1	BASELINE
FBgn0015621	Clp	2L:819964-821209	+	Known	YES	1.38304e-07	0.994204	1	0.00956846	0.640933	2.10942e-15	2.09356e-14	0.252552	0.00015636	0.000639613	0.789797	1	BASELINE
FBgn0015622	Cnx99A	3R:25140976-25145366	-	Known	YES	0.00247532	0.330865	0.706916	0.279566	0.83564	4.81837e-14	4.18049e-13	0.459613	1.15673e-10	1.19623e-09	0.619629	1	BOTH
FBgn0015623	Cpr	2L:6338836-6346280	+	Known	YES	0.00846616	0.0717032	0.309804	0.239081	0.813343	0.00204373	0.00643169	0.50575	4.17619e-15	7.18026e-14	1	1	BOTH
FBgn0015625	CycB3	3R:20693656-20696538	-	Known	YES	0.000320711	0.726477	0.9847	0.0433438	0.672871	2.92433e-13	2.35435e-12	0.393187	0.00170528	0.00548475	0.00893977	0.170367	BOTH
FBgn0015663	Dot	2L:3619097-3621573	+	Known	YES	0.100729	1.96126e-10	1.51509e-08	0.534958	0.926561	6.11702e-11	4.0662e-10	0.710569	3.69046e-27	2.20553e-25	1	1	BOTH
FBgn0015664	Dref	2L:9964147-9967229	-	Known	YES	0.00161949	0.431667	0.795504	0.0636665	0.686739	0	0	0.290063	0.000216175	0.000856399	0.426325	1	BASELINE
FBgn0015714	Cyp6a17	2R:10761458-10763244	+	Known	YES	0.0160686	0.0129204	0.09881	0.576841	0.936742	0.00745674	0.0204083	0.961666	4.29651e-32	4.17533e-30	5.34161e-27	1.1193e-23	BOTH
FBgn0015721	ktub	2R:16989433-17011209	+	Known	YES	0.0280436	0.000987124	0.0133989	0.88851	0.985863	0.0794411	0.149137	0.0647246	0.176728	0.326437	1	1	NONE
FBgn0015737	Hmu	3R:23114491-23117314	+	Known	YES	0.015986	0.0131565	0.100018	0.358427	0.869629	0.744575	0.817361	0.298512	1.84406e-06	1.08353e-05	1	1	BOTH
FBgn0015754	Lis-1	2R:12066331-12072608	+	Known	YES	0.00345402	0.250594	0.620537	0.215016	0.804409	0	0	0.273639	0.000948698	0.00323176	0.360718	1	BASELINE
FBgn0015756	RpL9	2L:11002758-11004189	-	Known	YES	0.00147862	0.452449	0.813114	0.0490855	0.679301	0.870061	0.91054	0.217351	4.80806e-06	2.62583e-05	1	1	ETOH
FBgn0015765	p38a	3R:19976138-19978043	-	Known	YES	0.0264619	0.00138083	0.0176901	0.680536	0.953856	0	0	0.300124	0.000996287	0.00338219	0.208783	0.889092	BASELINE
FBgn0015766	Msr-110	3L:5560019-5570448	-	Known	YES	0.0217686	0.0037595	0.0392908	0.993348	0.998842	2.22045e-16	2.42491e-15	0.483463	2.68504e-07	1.78933e-06	0.0316874	0.348804	BOTH
FBgn0015770	MstProx	3R:3191661-3195027	-	Known	YES	0.000236792	0.763736	1	0.652522	0.949958	0.00187919	0.00597843	0.027953	0.513285	0.767817	1	1	NONE
FBgn0015772	Nak	2L:18957732-18968744	-	Known	YES	0.000381467	0.702817	0.973133	0.657577	0.951133	4.49307e-13	3.55836e-12	0.407931	1.21214e-05	6.16962e-05	0.078041	0.557868	BOTH
FBgn0015773	NetA	X:14498045-14547961	-	Known	YES	0.0340727	0.000276182	0.00468839	0.680645	0.953856	3.33067e-16	3.60914e-15	0.571368	2.95033e-07	1.95485e-06	0.000317872	0.0168628	BOTH
FBgn0015774	NetB	X:14580071-14643409	-	Known	YES	8.79037e-05	0.854696	1	0.00134053	0.530364	3.32633e-11	2.26182e-10	0.419999	0.00032982	0.00125273	0.00891647	0.170241	BOTH
FBgn0015776	nrv1	2L:6778555-6786861	-	Known	YES	0.0111171	0.0389072	0.209971	0.332654	0.858961	2.22045e-16	2.42491e-15	0.632258	9.75945e-15	1.60868e-13	0.0540453	0.462792	BOTH
FBgn0015777	nrv2	2L:6789770-6798862	-	Known	YES	0.0102657	0.0472456	0.237592	0.558841	0.933393	0.000707378	0.00244872	0.442359	0.000193022	0.000774374	0.00478962	0.112452	BOTH
FBgn0015778	rin	3R:9472726-9480249	+	Known	YES	0.0106741	0.0430343	0.224355	0.48474	0.911189	6.66134e-16	6.94437e-15	0.249558	0.102053	0.205201	0.0607576	0.491965	BASELINE
FBgn0015781	P5cr	3R:14854653-14855881	+	Known	YES	0.00735248	0.0933673	0.362852	0.0258478	0.655419	0.000546549	0.00193072	0.258027	0.000937122	0.00319785	0.472173	1	ETOH
FBgn0015789	Rab10	X:20122412-20125717	+	Known	YES	0.0752921	4.63658e-08	2.16204e-06	0.617001	0.944352	3.33067e-16	3.60914e-15	0.361618	2.44797e-06	1.4085e-05	0.405863	1	BASELINE
FBgn0015790	Rab11	3R:16937130-16941868	+	Known	YES	2.12857e-06	0.977266	1	0.136191	0.749848	0	0	0.229127	4.09578e-05	0.000189067	1	1	BASELINE
FBgn0015791	Rab14	2L:14355145-14358764	+	Known	YES	0.133263	1.50544e-13	2.06856e-11	0.553661	0.931317	8.03449e-08	4.29411e-07	0.67455	1.76921e-16	3.54974e-15	0.0279372	0.326929	BOTH
FBgn0015793	Rab19	3L:8290118-8291606	+	Known	YES	0.0063403	0.119297	0.420052	0.031719	0.664932	4.01901e-14	3.52068e-13	0.254193	0.000371847	0.00139544	0.639059	1	BASELINE
FBgn0015794	Rab18	X:5564860-5565845	-	Known	YES	0.00138788	0.466673	0.824109	0.612255	0.943126	0.00662603	0.0184404	0.10402	0.019317	0.0480875	1	1	NONE
FBgn0015795	Rab7	3R:19818730-19821174	+	Known	YES	0.000388273	0.700305	0.972019	0.0324575	0.664932	2.41451e-12	1.80153e-11	0.242535	0.336632	0.551788	0.0245848	0.304715	ETOH
FBgn0015797	Rab6	2L:12107221-12109116	-	Known	YES	0.0193928	0.00626991	0.0582948	0.0224524	0.655419	0	0	0.0240117	0.573515	0.835175	1	1	BASELINE
FBgn0015799	Rbf	X:691123-695512	-	Known	YES	0.000395711	0.697587	0.970538	0.203836	0.795948	0	0	0.364202	0.000596695	0.00213687	0.0481497	0.438089	BASELINE
FBgn0015801	Reg-5	2R:20675531-20680933	-	Known	YES	0.00321759	0.267506	0.641307	0.810951	0.974676	0.114018	0.199033	0.234944	0.000577634	0.00207326	0.740039	1	BASELINE
FBgn0015803	RtGEF	2L:20350434-20365254	+	Known	YES	0.0149927	0.0163668	0.116801	0.0783568	0.699895	1.18995e-09	7.24737e-09	0.31693	8.46081e-06	4.42053e-05	0.626504	1	BASELINE
FBgn0015805	HDAC1	3L:4626734-4629467	+	Known	YES	0.0131297	0.0247377	0.155083	0.0226181	0.655419	0	0	0.372378	2.77107e-06	1.58003e-05	0.318886	1	BASELINE
FBgn0015806	S6k	3L:5790649-5804031	-	Known	YES	0.000765429	0.588863	0.906157	0.0876339	0.709454	5.1812e-07	2.58374e-06	0.417133	8.921e-05	0.000384935	0.0217837	0.285632	BOTH
FBgn0015808	ScpX	2L:18831229-18833630	+	Known	YES	0.00675195	0.107907	0.396297	0.0590841	0.685423	0.00135315	0.00443716	0.345147	5.64967e-05	0.000253219	0.221885	0.91345	BASELINE
FBgn0015818	Spx	X:6149855-6151629	+	Known	YES	4.83555e-05	0.891961	1	0.763136	0.968365	0.000463637	0.00165802	0.321894	0.000197079	0.000788952	0.238372	0.94333	BOTH
FBgn0015828	TfIIEalpha	3L:11675138-11676905	+	Known	YES	0.000825732	0.574539	0.897558	0.117339	0.732875	3.59584e-10	2.27008e-09	0.256296	0.00031915	0.00121634	0.644168	1	BASELINE
FBgn0015829	TfIIEbeta	3L:4287038-4288349	+	Known	YES	0.00379917	0.228184	0.593499	0.112983	0.72805	1.49149e-08	8.393e-08	0.16988	0.00096398	0.00328115	0.999999	1	BASELINE
FBgn0015831	Rtnl2	3R:3354586-3355963	-	Known	YES	0.0257807	0.00159597	0.0197446	0.72049	0.961395	0.000149075	0.000575022	0.0825042	0.461545	0.706521	0.623192	1	NONE
FBgn0015834	eIF3i	2L:4966367-4967775	-	Known	YES	0.000654836	0.617144	0.922878	0.496391	0.914475	2.83982e-07	1.4509e-06	0.173653	0.000243962	0.000954001	1	1	NONE
FBgn0015838	Vang	2R:4990743-4994301	+	Known	YES	0.017945	0.00858007	0.0733822	0.942222	0.992145	0	0	0.424161	1.93687e-08	1.51546e-07	0.408813	1	BASELINE
FBgn0015872	Drip	2R:7298708-7317150	-	Known	YES	0.00474391	0.178016	0.524516	0.171145	0.771457	4.43341e-06	2.02346e-05	0.627925	3.1918e-13	4.43295e-12	0.0178674	0.254324	BOTH
FBgn0015903	apt	2R:19452414-19487049	+	Known	YES	0.0238213	0.002423	0.0277825	0.837867	0.97966	0	0	0.686179	2.03574e-19	5.49536e-18	0.137362	0.734665	BOTH
FBgn0015904	ara	3L:12573772-12589118	+	Known	YES	0.00116257	0.505305	0.851424	0.464515	0.904384	6.70411e-09	3.87405e-08	0.335028	0.0073376	0.020274	0.0283944	0.329861	BOTH
FBgn0015905	ast	2L:1077948-1080803	+	Known	YES	0.00134639	0.473415	0.828523	0.416687	0.887185	0	0	0.334068	1.42389e-06	8.48239e-06	0.707951	1	BASELINE
FBgn0015907	bl	2R:16475056-16494359	+	Known	YES	0.051389	7.24768e-06	0.00020454	0.146959	0.755434	0	0	0.256031	1.01653e-05	5.23519e-05	1	1	BASELINE
FBgn0015919	caup	3L:12602731-12614898	+	Known	YES	0.0156582	0.0141376	0.105117	0.916803	0.990291	8.21565e-15	7.67221e-14	0.124605	0.0220435	0.0541347	1	1	NONE
FBgn0015924	crq	2L:448254-453024	-	Known	YES	0.00277183	0.303461	0.680502	0.0920173	0.713763	0	0	0.413829	1.58932e-06	9.41932e-06	0.144642	0.752198	BASELINE
FBgn0015925	csul	2R:12152157-12154464	+	Known	YES	0.0539309	4.24619e-06	0.000127109	0.105343	0.722409	0	0	0.357564	9.89932e-06	5.11e-05	0.297875	1	BASELINE
FBgn0015926	dah	X:15222375-15225035	+	Known	YES	0.00503703	0.165143	0.503345	0.0568925	0.683125	1.23235e-14	1.13564e-13	0.349318	0.000265125	0.00102948	0.109716	0.660825	BASELINE
FBgn0015929	dpa	2R:3384207-3387650	-	Known	YES	0.000464733	0.673672	0.955741	0.0393019	0.671288	0	0	0.290732	6.7493e-05	0.000298252	0.573058	1	BASELINE
FBgn0015946	grim	3L:18295819-18297517	-	Known	YES	0.00244601	0.333749	0.709811	0.898184	0.987866	0.568468	0.675654	0.326648	0.610157	0.874444	0.000295539	0.0160853	ETOH
FBgn0015949	hrg	2R:15551424-15557337	-	Known	YES	0.0178575	0.00874488	0.0743953	0.889487	0.985986	7.77156e-16	8.07163e-15	0.235606	0.00695442	0.019321	0.355689	1	BASELINE
FBgn0016013	Faa	3L:4072032-4073954	-	Known	YES	0.0233954	0.00265378	0.0298267	0.753596	0.966888	0.179785	0.284257	0.559907	4.8934e-18	1.14488e-16	1	1	BOTH
FBgn0016031	lama	3L:5336719-5349023	-	Known	YES	0.00763875	0.087197	0.348055	0.701022	0.957915	0.000494816	0.00176066	0.678236	3.65148e-12	4.4959e-11	0.000155363	0.00936845	BOTH
FBgn0016032	lbm	2R:2936743-2939469	+	Known	YES	0.000615699	0.627869	0.929408	0.469947	0.905008	3.56682e-11	2.41946e-10	0.446678	1.06045e-08	8.55893e-08	0.296831	1	BOTH
FBgn0016034	mael	3L:22717333-22719334	+	Known	YES	0.012642	0.027587	0.166668	0.271222	0.830581	0	0	0.435602	4.63002e-07	2.97776e-06	0.12334	0.700766	BOTH
FBgn0016036	mei-P22	3L:7237488-7238483	+	Known	YES	0.0141683	0.0196372	0.13231	0.617947	0.944352	1.6353e-05	7.07939e-05	0.281676	0.0054924	0.0156452	0.152028	0.770114	BASELINE
FBgn0016038	Vsp37A	X:515563-517084	+	Known	YES	0.000935585	0.550125	0.881104	0.0281809	0.660983	4.82754e-11	3.23859e-10	0.300753	0.000627386	0.00223295	0.245722	0.955778	BASELINE
FBgn0016041	Tom40	X:7630926-7634011	+	Known	YES	0.0133737	0.0234278	0.149328	0.0333261	0.664932	0	0	0.350607	8.92699e-05	0.000385094	0.165499	0.801022	BOTH
FBgn0016047	nompA	2R:7197840-7206181	-	Known	YES	0.00141816	0.461848	0.820183	0.770954	0.968671	2.63747e-05	0.000111782	0.260006	0.0152799	0.0390523	0.152702	0.771248	BASELINE
FBgn0016053	pgc	2R:18217705-18220318	+	Known	YES	0.0109066	0.0408136	0.216239	0.0305086	0.664932	0	0	0.413497	1.82829e-06	1.07482e-05	0.138865	0.737661	BOTH
FBgn0016054	phr6-4	2L:20643351-20645791	-	Known	YES	0.0205748	0.00485902	0.0479283	0.310615	0.848136	0	0	0.787204	8.14429e-28	5.18129e-26	0.146087	0.755907	BOTH
FBgn0016059	Sema1b	2R:13560344-13571004	-	Known	YES	0.0127175	0.0271248	0.165226	0.359244	0.87001	0	0	0.382115	2.26092e-05	0.000109858	0.125997	0.707807	BASELINE
FBgn0016061	side	3R:23200810-23263204	-	Known	YES	0.00122066	0.494848	0.843712	0.00731126	0.640933	0	0	0.310457	0.000195828	0.000784412	0.30227	1	BOTH
FBgn0016070	smg	3L:8983417-8991089	-	Known	YES	0.000102041	0.843586	1	0.0715196	0.693855	2.22045e-16	2.42491e-15	0.350671	0.00163895	0.00529835	0.042572	0.411803	BASELINE
FBgn0016075	vkg	2L:5012144-5028191	-	Known	YES	0.000665655	0.61425	0.921183	0.125523	0.740776	0	0	0.404965	1.15478e-08	9.27336e-08	0.634979	1	BOTH
FBgn0016076	vri	2L:5288944-5311223	+	Known	YES	0.000172079	0.797773	1	0.000261075	0.378235	1.77636e-15	1.77774e-14	0.335319	0.000711741	0.0025	0.1024	0.640349	BOTH
FBgn0016078	wun	2R:5288036-5300968	-	Known	YES	0.0233751	0.00266531	0.0299396	0.117686	0.732912	0.000972105	0.00327876	0.393789	2.24678e-11	2.52523e-10	0.999999	1	BASELINE
FBgn0016080	xmas-1	X:17045264-17048625	-	Known	YES	0.0396508	8.53961e-05	0.0017373	0.000600247	0.438323	0.979709	0.986834	0.558979	5.25542e-06	2.85157e-05	8.58202e-05	0.00573166	BOTH
FBgn0016081	fry	3L:9624934-9672203	-	Known	YES	0.000359018	0.711292	0.976835	0.553146	0.931155	0	0	0.25881	0.000309201	0.00118205	0.627137	1	BASELINE
FBgn0016119	ATPsynCF6	3R:19180942-19181786	-	Known	YES	0.0387275	0.000103689	0.00205218	0.832311	0.978345	0.011519	0.029748	0.245451	9.85594e-05	0.000422342	0.93108	1	BASELINE
FBgn0016120	ATPsynD	3R:14920722-14921993	+	Known	YES	0.000207042	0.778664	1	0.863894	0.983665	0.0124497	0.031777	0.300207	0.000186098	0.000749916	0.372852	1	BASELINE
FBgn0016122	Acer	2L:8521933-8525740	+	Known	YES	0.00124552	0.490485	0.841022	0.105352	0.722409	0.000669396	0.00232951	0.821194	9.71955e-29	6.69132e-27	0.0218075	0.285632	BOTH
FBgn0016123	Alp4	3R:26874651-26878262	+	Known	YES	0.00840443	0.0727506	0.312591	0.983174	0.997699	1.17484e-12	8.9572e-12	0.772506	3.75104e-16	7.29049e-15	1.95207e-06	0.000246969	BOTH
FBgn0016126	CaMKI	4:466130-474573	+	Known	YES	0.000982584	0.54027	0.874885	0.084214	0.706003	0	0	0.0965242	0.0309612	0.0730136	1	1	NONE
FBgn0016131	Cdk4	2R:12466975-12472953	+	Known	YES	0.00358898	0.241527	0.610085	0.145329	0.755434	0	0	0.699977	8.57541e-19	2.17974e-17	0.0459284	0.428687	BOTH
FBgn0016641	PTP-ER	2R:17506826-17511951	-	Known	YES	0.047417	1.6702e-05	0.000427783	0.011366	0.640933	2.03073e-09	1.21605e-08	0.232224	0.0610075	0.131927	0.135482	0.730155	BASELINE
FBgn0016650	Lgr1	3R:13551499-13558929	+	Known	YES	0.00314834	0.272726	0.647633	0.180684	0.779905	8.52429e-13	6.56179e-12	0.492019	1.01441e-12	1.33164e-11	0.805262	1	BOTH
FBgn0016660	H15	2L:5404280-5416593	+	Known	YES	0.052006	6.36575e-06	0.00018257	0.260901	0.827755	0.116743	0.202859	0.257654	1.2072e-05	6.14545e-05	1	1	BASELINE
FBgn0016672	Ipp	3R:9784511-9786196	+	Known	YES	0.0137996	0.0213106	0.140191	0.920434	0.990437	0.922518	0.947203	0.301047	1.92115e-07	1.31262e-06	0.999999	1	BASELINE
FBgn0016675	Lectin-galC1	2L:19417447-19418274	+	Known	YES	0.000828297	0.573945	0.897219	0.722774	0.961481	0.450261	0.569577	0.932523	5.75226e-49	3.21427e-46	0.0188798	0.262322	BOTH
FBgn0016684	NaPi-T	2R:10730225-10733379	-	Known	YES	0.0399123	8.08274e-05	0.00165743	0.19833	0.790021	0.000226497	0.000851804	0.646094	4.26841e-17	9.10929e-16	0.159529	0.788665	BOTH
FBgn0016685	Nlp	3R:25830507-25836074	+	Known	YES	0.0791692	2.02957e-08	1.03413e-06	0.231209	0.813008	1.11022e-16	1.26222e-15	0.495043	6.6385e-11	7.05896e-10	0.350598	1	BOTH
FBgn0016687	Nurf-38	2R:20446490-20448610	-	Known	YES	0.0109525	0.0403901	0.21481	0.407506	0.884471	0	0	0.259776	4.8805e-06	2.66193e-05	0.999999	1	BASELINE
FBgn0016691	ATPsynO	3R:11091313-11092412	+	Known	YES	0.00453555	0.187869	0.538827	0.450161	0.899412	6.35683e-07	3.14798e-06	0.234705	3.35438e-05	0.000157246	0.999999	1	BASELINE
FBgn0016693	Past1	3R:8523044-8530597	+	Known	YES	0.0247075	0.00200568	0.0238625	0.635364	0.946814	5.36907e-07	2.67496e-06	0.467736	7.41139e-09	6.0813e-08	0.197179	0.867044	BOTH
FBgn0016694	Pdp1	3L:7804558-7860469	-	Known	YES	0.00496401	0.168248	0.508784	0.00245541	0.591391	0.615558	0.715461	0.291082	0.0344278	0.0801959	0.0402128	0.399471	BOTH
FBgn0016696	Pitslre	3L:20764628-20770031	+	Known	YES	0.0847968	6.09296e-09	3.50392e-07	0.342728	0.863763	0	0	0.278984	7.78098e-06	4.08892e-05	1	1	BASELINE
FBgn0016697	Prosalpha5	2R:13300272-13301274	+	Known	YES	8.29376e-05	0.858816	1	0.00700875	0.640933	0	0	0.324165	0.000147402	0.000606672	0.251356	0.96289	BOTH
FBgn0016698	Ptpa	2L:3377002-3378590	+	Known	YES	0.00653215	0.113832	0.408352	0.093987	0.713763	2.66454e-15	2.6143e-14	0.366954	7.63319e-07	4.74625e-06	0.49073	1	BASELINE
FBgn0016700	Rab1	3R:17091751-17094782	-	Known	YES	0.00313448	0.273785	0.648889	0.463186	0.904351	3.0096e-11	2.05229e-10	0.0794449	0.0707373	0.149987	1	1	NONE
FBgn0016701	Rab4	2R:13460967-13462484	+	Known	YES	0.00741741	0.0919275	0.359232	0.746896	0.965393	0	0	0.132226	0.00384584	0.0113713	1	1	BASELINE
FBgn0016715	Reg-2	3L:605165-606569	-	Known	YES	0.000393431	0.698417	0.971168	0.486643	0.91179	0.000924517	0.00313371	0.612978	4.23463e-17	9.04873e-16	0.438627	1	BOTH
FBgn0016726	RpL29	2R:17181273-17181909	+	Known	YES	0.0134026	0.0232773	0.148679	0.387276	0.879453	0.694262	0.778354	0.108968	0.0154056	0.0393288	1	1	NONE
FBgn0016754	sba	3R:19719896-19748695	-	Known	YES	0.0222664	0.00337891	0.0361044	0.149363	0.758377	0.000550699	0.0019443	0.181743	0.0029189	0.00886992	0.944388	1	BASELINE
FBgn0016756	Usp47	3L:5746073-5754986	+	Known	YES	0.00259506	0.319424	0.695803	0.0421988	0.672871	0.0318361	0.0706121	0.198915	0.000312746	0.00119451	1	1	BASELINE
FBgn0016762	angel	2R:19581526-19582755	+	Known	YES	0.00661267	0.111621	0.404314	0.802975	0.973721	0.000740874	0.00255228	0.201806	4.66901e-05	0.000213035	0.999999	1	BASELINE
FBgn0016792	dmt	3R:5536864-5540397	+	Known	YES	6.88159e-05	0.871281	1	0.0871881	0.708008	0	0	0.318269	0.000681988	0.00240482	0.160668	0.790826	BASELINE
FBgn0016794	dos	3L:2589414-2595590	+	Known	YES	0.00274779	0.30557	0.683036	0.168581	0.770084	1.11022e-16	1.26222e-15	0.411101	7.52379e-06	3.9662e-05	0.0865451	0.588679	BOTH
FBgn0016797	fz2	3L:19134075-19228473	-	Known	YES	7.58289e-06	0.957106	1	0.00765882	0.640933	0	0	0.493013	1.72523e-05	8.54763e-05	0.00204918	0.0647758	BOTH
FBgn0016917	Stat92E	3R:16361045-16378033	-	Known	YES	0.000314335	0.729102	0.986229	0.985764	0.997699	0	0	0.252583	0.00076563	0.00266943	0.543684	1	BASELINE
FBgn0016919	nompB	2L:21578292-21589423	-	Known	YES	0.00367741	0.235801	0.60226	0.788411	0.971306	0.00252082	0.00777113	0.276872	0.000179687	0.000726792	0.553315	1	BASELINE
FBgn0016920	nompC	2L:5346237-5365760	+	Known	YES	0.00390501	0.221801	0.585695	0.151228	0.759899	4.60939e-06	2.10131e-05	0.312177	1.26589e-06	7.61831e-06	0.938957	1	BOTH
FBgn0016926	Pino	2L:1114654-1128953	-	Known	YES	0.0904883	1.79473e-09	1.16612e-07	0.732739	0.963316	0.0584586	0.116479	0.716219	2.78436e-13	3.88801e-12	2.07494e-05	0.00178376	BOTH
FBgn0016930	Dyrk2	2L:14184478-14234126	-	Known	YES	0.00113946	0.509569	0.855084	0.258141	0.825964	6.20415e-09	3.59195e-08	0.413826	1.69676e-05	8.41403e-05	0.0560514	0.472288	BOTH
FBgn0016970	l(2)k10201	2R:5286585-5287404	+	Known	YES	0.0400485	7.85477e-05	0.00161364	0.0518724	0.679301	0	0	0.354734	2.06424e-07	1.40278e-06	0.765689	1	BASELINE
FBgn0016974	swaPsi	X:6255529-6257343	-	Known	YES	0.0626687	6.73225e-07	2.43224e-05	0.510767	0.918935	8.65237e-05	0.000343919	0.730473	4.10424e-22	1.49406e-20	0.0970349	0.624811	BOTH
FBgn0016977	spen	2L:159032-203397	+	Known	YES	0.00471199	0.179486	0.526775	0.15006	0.758699	2.88749e-07	1.47414e-06	0.165278	0.0697571	0.148106	0.463325	1	BASELINE
FBgn0016978	snRNP-U1-70K	2L:6968711-6971737	-	Known	YES	0.0015101	0.447673	0.80916	0.243633	0.817469	0	0	0.220487	0.000113772	0.00048047	1	1	BASELINE
FBgn0016983	smid	3L:7374714-7378737	+	Known	YES	0.0109498	0.0404147	0.214906	0.563423	0.934931	0	0	0.350539	3.91577e-06	2.17935e-05	0.439349	1	BASELINE
FBgn0016984	sktl	2R:16714787-16723533	-	Known	YES	0.00244598	0.333751	0.709811	0.160221	0.765995	4.52795e-09	2.64711e-08	0.481312	2.36616e-07	1.59234e-06	0.0363565	0.377376	BOTH
FBgn0017414	cag	2R:6780539-6781919	-	Known	YES	0.00341863	0.25304	0.623478	0.104068	0.721982	0	0	0.428434	1.41852e-08	1.12725e-07	0.404668	1	BOTH
FBgn0017418	ari-1	X:18024425-18031817	-	Known	YES	0.0189245	0.00693822	0.0627846	0.627598	0.945672	4.43274e-11	2.9803e-10	0.219114	0.0437239	0.0986132	0.218527	0.906796	BASELINE
FBgn0017429	CG5989	3L:8595511-8597249	-	Known	YES	0.00199171	0.383142	0.755838	0.763789	0.968391	1.18874e-07	6.2654e-07	0.139416	0.00287077	0.00873396	1	1	NONE
FBgn0017430	Nelf-E	3L:8592542-8593979	-	Known	YES	0.000383781	0.70196	0.972706	0.0944201	0.713763	1.06581e-14	9.87063e-14	0.378501	5.5362e-07	3.51538e-06	0.432547	1	BOTH
FBgn0017448	CG2187	3R:27581078-27584359	-	Known	YES	0.0187858	0.0071497	0.0641998	0.116273	0.731969	0.00030652	0.0011298	0.877506	1.28174e-36	1.80558e-34	0.0207712	0.27767	BOTH
FBgn0017456	Ubc84D	3R:3344542-3345178	-	Known	YES	0.00601254	0.129315	0.438953	0.0895919	0.711719	0.0112325	0.0291115	0.0692068	0.70872	0.977387	0.572925	1	NONE
FBgn0017457	U2af38	2L:292959-294681	-	Known	YES	0.00193925	0.389487	0.760887	0.0190136	0.645654	1.17306e-12	8.9457e-12	0.226544	0.00266394	0.00816697	0.562887	1	BASELINE
FBgn0017482	T3dh	2R:18217231-18219577	-	Known	YES	0.00177869	0.409871	0.777272	0.73403	0.963582	3.37956e-06	1.56212e-05	0.566457	1.9158e-09	1.69743e-08	0.00840232	0.163307	BOTH
FBgn0017545	RpS3A	4:85851-87833	-	Known	YES	0.00196636	0.38619	0.758129	0.613222	0.943214	0	0	0.223934	0.00010629	0.000451706	1	1	BASELINE
FBgn0017550	Rga	3R:1432997-1438834	-	Known	YES	0.00272881	0.307249	0.684461	0.235754	0.813008	4.42979e-14	3.86537e-13	0.229235	0.0175168	0.0440807	0.275666	1	BASELINE
FBgn0017551	Rca1	2L:6852315-6853866	+	Known	YES	0.0137268	0.0216579	0.141904	0.202888	0.79495	6.66134e-16	6.94437e-15	0.353088	2.12473e-05	0.000103706	0.258281	0.973183	BASELINE
FBgn0017556	Prosalpha4T2	2R:20388303-20389800	-	Known	YES	0.0173283	0.00981198	0.0808271	0.367608	0.872328	0.481607	0.598943	0	1	1	1	1	NONE
FBgn0017558	Pdk	2R:5313944-5322143	+	Known	YES	0.00679625	0.106754	0.393811	0.0763832	0.697225	0.821493	0.875207	0.556188	7.41337e-07	4.61728e-06	0.000453296	0.0218671	BOTH
FBgn0017561	Ork1	X:10772087-10785283	-	Known	YES	0.0184526	0.00768498	0.0677335	0.152407	0.76086	0.000129116	0.000502373	0.462264	1.06104e-09	9.73284e-09	0.374138	1	BOTH
FBgn0017566	ND-75	X:8142684-8145720	-	Known	YES	0.00544994	0.148768	0.476247	0.687508	0.954615	1.19238e-13	9.96852e-13	0.491016	1.27738e-14	2.07292e-13	1	1	BOTH
FBgn0017567	ND-23	3R:11661770-11662839	-	Known	YES	0.00320027	0.2688	0.642662	0.526265	0.923903	0.941397	0.960583	0.322701	1.48562e-06	8.82815e-06	0.812051	1	BASELINE
FBgn0017572	Mo25	3L:16606318-16608572	-	Known	YES	0.000143349	0.815092	1	0.0367316	0.66897	0	0	0.313032	0.000331308	0.00125782	0.239271	0.9449	ETOH
FBgn0017577	Mcm5	3R:6614246-6616872	+	Known	YES	0.0188412	0.00706449	0.0636526	0.0186191	0.645654	0	0	0.307807	0.0002863	0.00110381	0.280667	1	BASELINE
FBgn0017578	Max	3L:19255332-19257284	-	Known	YES	0.0177404	0.00897018	0.0757922	0.543606	0.929688	0	0	0.256409	1.09965e-05	5.63643e-05	1	1	BASELINE
FBgn0017579	RpL14	3L:8594106-8595492	+	Known	YES	0.000130234	0.823608	1	0.163002	0.767515	0.0253114	0.058273	0.0737669	0.0924339	0.188471	1	1	NONE
FBgn0017581	Lk6	3R:7576653-7590179	-	Known	YES	0.0691248	1.71788e-07	7.22436e-06	0.164787	0.768411	0.0187861	0.0452552	0.477679	2.31856e-05	0.000112382	0.00365869	0.0932814	BOTH
FBgn0017590	klg	3R:18725006-18787453	+	Known	YES	4.12935e-06	0.96834	1	0.541044	0.928716	1.39243e-09	8.44221e-09	0.376163	0.00176253	0.00564775	0.0169353	0.247	BOTH
FBgn0019624	COX5A	3R:7645081-7646021	+	Known	YES	0.00192557	0.391166	0.76221	0.320239	0.854138	0.240434	0.355511	0.295356	0.00157771	0.00512459	0.192729	0.857476	BASELINE
FBgn0019637	Atu	3R:1439080-1441661	+	Known	YES	0.0574857	2.00885e-06	6.46359e-05	0.09151	0.713763	1.29754e-09	7.88117e-09	0.198646	0.000157136	0.000642396	1	1	NONE
FBgn0019643	AANAT1	2R:20027086-20045285	+	Known	YES	0.0311797	0.000508433	0.00775886	0.74852	0.965999	0.447749	0.567106	0.469027	1.86004e-13	2.65934e-12	1	1	BOTH
FBgn0019644	ATPsynB	3L:9723099-9724324	+	Known	YES	0.00326994	0.263643	0.635609	0.484415	0.910837	0.0196871	0.0471072	0.247863	6.09182e-06	3.26367e-05	1	1	BASELINE
FBgn0019650	toy	4:1010351-1028548	+	Known	YES	0.000184775	0.790612	1	0.0234703	0.655419	5.54706e-08	2.99236e-07	0.430557	0.00413008	0.0121209	0.000776069	0.0326349	BOTH
FBgn0019660	lncRNA:roX2	X:11473098-11474465	+	Known	YES	0.00165062	0.427271	0.79188	0.831036	0.978305	0.721602	0.799643	0.221948	0.150384	0.285225	0.0944223	0.616494	BASELINE
FBgn0019661	lncRNA:roX1	X:3751263-3756730	-	Known	YES	0.00062417	0.625512	0.928012	0.182057	0.779905	7.11716e-05	0.000285881	0.358907	0.0199107	0.0494405	0.00542584	0.122582	BOTH
FBgn0019662	qm	3L:7341413-7346722	+	Known	YES	0.0151928	0.015661	0.113088	0.506725	0.917463	6.66134e-15	6.28374e-14	0.380455	0.0173414	0.0436818	0.00240375	0.0720833	BOTH
FBgn0019686	lok	2L:20061422-20064381	+	Known	YES	0.0101241	0.0488057	0.24268	0.218463	0.80606	0	0	0.400988	1.28558e-06	7.72356e-06	0.214265	0.900302	BOTH
FBgn0019809	gcm2	2L:9608562-9612706	+	Known	YES	0.00765278	0.086906	0.347286	0.317177	0.852404	0.33108	0.451719	0.16685	0.0717669	0.151797	0.446707	1	NONE
FBgn0019828	dj	3R:2885037-2886246	+	Known	YES	0.00197228	0.385475	0.75771	0.585578	0.938935	0.00254068	0.00782803	0.0322151	0.999999	1	0.656481	1	NONE
FBgn0019830	colt	2L:2768590-2770069	-	Known	YES	0.00113162	0.51103	0.856623	0.180178	0.779905	5.07705e-13	3.99255e-12	0.246106	0.000284195	0.00109644	0.753771	1	ETOH
FBgn0019886	Letm1	2R:20397031-20402843	-	Known	YES	0.00153061	0.444602	0.806393	0.324666	0.854751	2.10942e-15	2.09356e-14	0.240656	0.000238445	0.000934464	0.832877	1	BASELINE
FBgn0019890	Smg5	2L:13898828-13904661	-	Known	YES	0.000135207	0.820328	1	0.936508	0.991862	0.385479	0.506219	0.476342	5.7822e-13	7.80748e-12	1	1	BOTH
FBgn0019925	Surf4	3R:11169375-11171898	-	Known	YES	0.0429619	4.2585e-05	0.000956935	0.0704497	0.691433	0	0	0.0826568	0.103639	0.207805	1	1	BASELINE
FBgn0019928	Ser8	2R:9321712-9322550	+	Known	YES	0.00222571	0.356537	0.732272	0.214358	0.804037	0	0	0.666316	1.61073e-11	1.83934e-10	0.000169249	0.0100155	BOTH
FBgn0019929	Ser7	X:9759266-9761103	+	Known	YES	0.000990737	0.538593	0.87382	0.303116	0.845307	0.00171966	0.00551596	0.521199	8.93659e-13	1.18099e-11	0.50025	1	BOTH
FBgn0019932	SamDC	2L:10339457-10341503	+	Known	YES	0.0531018	5.05543e-06	0.000148548	0.676513	0.953166	0	0	0.377632	3.91864e-10	3.81697e-09	1	1	BASELINE
FBgn0019936	RpS20	3R:16647903-16649078	+	Known	YES	0.0137171	0.0217048	0.142045	0.194977	0.78873	0.000241738	0.000905464	0.139877	0.0038953	0.0115054	1	1	NONE
FBgn0019938	RpI1	2R:10483116-10488721	-	Known	YES	3.70542e-05	0.905357	1	0.366288	0.871369	0	0	0.534317	1.08838e-10	1.12903e-09	0.103484	0.64441	BOTH
FBgn0019940	Rh6	3R:11308880-11310421	+	Known	YES	0.0773041	3.0208e-08	1.46145e-06	0.147583	0.755434	2.55351e-15	2.51716e-14	0.745027	6.41044e-22	2.27914e-20	0.0364329	0.377468	BOTH
FBgn0019947	Psn	3L:20425568-20428256	+	Known	YES	0.00211866	0.368378	0.743744	0.0481516	0.679301	3.71259e-13	2.96476e-12	0.0812224	0.0779147	0.162889	1	1	NONE
FBgn0019948	Phm	2R:19872698-19875978	-	Known	YES	0.0440171	3.41175e-05	0.000793795	0.179163	0.779905	0.911611	0.93956	0.48814	1.79366e-13	2.56992e-12	1	1	BOTH
FBgn0019949	Cdk9	2R:18523568-18525232	-	Known	YES	0.00102131	0.532389	0.87057	0.128293	0.744257	5.83851e-10	3.63319e-09	0.183597	0.00384179	0.0113603	0.875247	1	BASELINE
FBgn0019952	Orct	3R:20101982-20104514	+	Known	YES	0.0234836	0.00260422	0.0293781	0.818627	0.976181	0	0	0.503389	1.08828e-13	1.59889e-12	0.930679	1	BOTH
FBgn0019957	ND-42	3R:17853431-17855115	+	Known	YES	0.019928	0.00558564	0.0532924	0.808743	0.974124	0.890024	0.92459	0.527469	6.42036e-18	1.48452e-16	0.999999	1	BOTH
FBgn0019960	Mitofilin	3R:17845227-17849057	-	Known	YES	2.60471e-05	0.920594	1	0.330029	0.85693	0.00855016	0.0230267	0.280515	4.8317e-07	3.09323e-06	1	1	BASELINE
FBgn0019968	Khc-73	2R:11403283-11419764	-	Known	YES	0.023932	0.00236639	0.0272358	0.595233	0.940985	0.258492	0.375503	0.544783	1.67237e-18	4.12579e-17	1	1	BOTH
FBgn0019972	Drice	3R:25625380-25627306	+	Known	YES	0.0393024	9.18846e-05	0.00185803	0.120443	0.736404	0	0	0.348376	4.68358e-07	3.00759e-06	0.719255	1	BASELINE
FBgn0019982	Gs1l	2L:4455137-4456807	-	Known	YES	0.00960994	0.0549393	0.262461	0.225567	0.810415	0.545942	0.655647	0.318406	1.25005e-06	7.52971e-06	0.878813	1	BOTH
FBgn0019985	mGluR	4:957445-970067	+	Known	YES	0.0357071	0.000195746	0.00351891	0.76507	0.968455	0.281485	0.400282	0.732905	3.22932e-17	6.99416e-16	0.000927093	0.0372273	BOTH
FBgn0019990	Gcn2	3R:27221382-27227735	+	Known	YES	0.0144294	0.0185343	0.127493	0.527994	0.924521	0	0	0.763287	7.34688e-25	3.54926e-23	0.0961525	0.621741	BOTH
FBgn0020018	Ppox	3R:20485919-20487573	-	Known	YES	0.0722033	8.94029e-08	3.95959e-06	0.100718	0.718335	1.56299e-09	9.43539e-09	0.242763	0.000149733	0.000615535	0.888971	1	BASELINE
FBgn0020224	Cbl	3L:8418054-8425346	+	Known	YES	0.0144438	0.0184755	0.127252	0.134757	0.748958	0	0	0.433193	0.00107689	0.00362973	0.00211793	0.0661302	BOTH
FBgn0020235	ATPsyngamma	3R:25573426-25574885	-	Known	YES	0.0214534	0.00402267	0.0413452	0.416968	0.887252	3.80628e-07	1.92241e-06	0.230166	5.24109e-05	0.000236753	0.999999	1	BASELINE
FBgn0020236	ATPCL	2R:11881036-11888795	-	Known	YES	1.6516e-08	0.997997	1	0.811194	0.974701	0	0	0.580007	4.96403e-09	4.16177e-08	0.00241769	0.0722442	BOTH
FBgn0020238	14-3-3epsilon	3R:14068253-14076272	+	Known	YES	0.00302779	0.282118	0.657943	0.122464	0.738118	0	0	0.266925	0.154494	0.291831	0.0251332	0.308434	BASELINE
FBgn0020248	stet	3L:1475438-1489547	-	Known	YES	8.31856e-05	0.858607	1	0.326848	0.856061	0	0	0.455657	2.85396e-09	2.47247e-08	0.339825	1	BOTH
FBgn0020249	stck	3R:4182700-4185686	+	Known	YES	0.00335959	0.257186	0.628291	0.0507252	0.679301	5.07161e-11	3.39146e-10	0.299947	9.62062e-05	0.000412944	0.45273	1	BOTH
FBgn0020251	sfl	3L:6488780-6543204	+	Known	YES	0.000513686	0.657951	0.946236	0.580334	0.938062	1.55706e-09	9.40296e-09	0.330396	5.20215e-07	3.31268e-06	0.882526	1	BASELINE
FBgn0020255	Ran	X:11038885-11042749	-	Known	YES	0.0026472	0.314604	0.691156	0.0410715	0.672606	0	0	0.260151	0.00249704	0.00771242	0.331155	1	BASELINE
FBgn0020257	Ppa	2R:18572460-18576492	-	Known	YES	0.00382748	0.226456	0.591165	0.610671	0.943101	6.84419e-09	3.95023e-08	0.482165	1.54756e-07	1.07002e-06	0.042353	0.410831	BOTH
FBgn0020258	ppk	2L:14378218-14381172	-	Known	YES	0.00122204	0.494605	0.843494	0.81134	0.974701	0.00441103	0.0128691	0.23324	0.000420566	0.00155856	0.808327	1	BASELINE
FBgn0020261	pcm	X:19379792-19386044	-	Known	YES	0.0611773	9.22356e-07	3.23471e-05	0.685995	0.954305	0.588954	0.693291	0.199551	0.000218538	0.000864841	0.999999	1	NONE
FBgn0020269	mspo	2R:10558901-10601127	-	Known	YES	0.115193	8.31238e-12	8.41961e-10	0.109963	0.723886	0	0	0.580331	1.09526e-09	1.00248e-08	0.00535619	0.121336	BOTH
FBgn0020270	mre11	2L:11282090-11284335	+	Known	YES	0.207958	4.05842e-21	1.33399e-18	0.607966	0.942662	3.88578e-15	3.74564e-14	0.622827	2.06471e-13	2.93569e-12	0.0275245	0.32482	BOTH
FBgn0020272	mst	X:21260004-21262560	+	Known	YES	0.00982614	0.0522665	0.253977	0.826807	0.978305	8.34022e-12	5.94746e-11	0.415652	3.22369e-10	3.17138e-09	0.967134	1	BOTH
FBgn0020277	lush	3L:19597498-19599190	-	Known	YES	8.48225e-05	0.857237	1	0.92331	0.990437	0.0248133	0.0572718	0.0482404	0.668501	0.936483	0.770803	1	NONE
FBgn0020278	loco	3R:18445690-18465109	-	Known	YES	0.00158569	0.436517	0.7993	0.53127	0.925593	0.0169167	0.0413583	0.259537	6.44227e-06	3.43714e-05	1	1	BASELINE
FBgn0020279	lig	2R:3955482-3966320	+	Known	YES	0.0792002	2.01621e-08	1.03045e-06	0.19149	0.78666	4.33696e-06	1.98197e-05	0.321178	2.40357e-08	1.85936e-07	0.999999	1	BOTH
FBgn0020280	laf	3R:701727-704255	-	Known	YES	0.00252444	0.326108	0.702851	0.825484	0.978118	0.00168953	0.00542865	0.114768	0.0127882	0.0333711	1	1	NONE
FBgn0020294	ko	3L:21068681-21124259	-	Known	YES	2.46961e-05	0.922675	1	0.0157567	0.640933	0	0	0.340787	0.000246561	0.00096323	0.141088	0.743179	BASELINE
FBgn0020299	stumps	3R:10402939-10433801	+	Known	YES	0.0515505	7.00564e-06	0.000198377	0.0439595	0.67347	6.13598e-12	4.41791e-11	0.419441	9.3467e-05	0.000402165	0.0194612	0.266316	BOTH
FBgn0020300	geko	3L:18132502-18138518	+	Known	YES	0.00422471	0.20377	0.560841	0.498232	0.914748	0.000805064	0.0027581	0.443052	2.04132e-12	2.58652e-11	1	1	BOTH
FBgn0020304	drongo	2L:833584-851071	-	Known	YES	0.00374942	0.23126	0.596558	0.812523	0.97501	0.000874063	0.00297412	0.397206	6.81922e-06	3.62556e-05	0.132945	0.725338	BOTH
FBgn0020305	dbe	2L:868673-869857	-	Known	YES	0.0138193	0.0212173	0.139861	0.183532	0.780318	7.67164e-12	5.48821e-11	0.274589	1.51568e-05	7.58226e-05	0.943017	1	BASELINE
FBgn0020306	dom	2R:17210935-17229352	+	Known	YES	0.0100355	0.0498081	0.245938	0.358022	0.869568	9.95648e-13	7.63269e-12	0.310653	0.000153853	0.000630358	0.325442	1	BASELINE
FBgn0020307	dve	2R:18131468-18173974	+	Known	YES	0.0346565	0.000244218	0.00421228	0.320414	0.854197	0	0	0.251526	0.000114544	0.000483361	0.849114	1	BASELINE
FBgn0020309	crol	2L:11794327-11809438	-	Known	YES	0.000827737	0.574074	0.897263	0.467279	0.904715	0.000698519	0.0024208	0.441597	1.53498e-09	1.37861e-08	0.514617	1	BOTH
FBgn0020312	Tmtc3	2R:17011240-17016015	-	Known	YES	0.0291051	0.000788366	0.0111244	0.0558068	0.683125	5.55112e-15	5.26908e-14	0.381842	1.45246e-07	1.00759e-06	0.552821	1	BASELINE
FBgn0020369	Rpt6	X:21187079-21188690	+	Known	YES	0.000852893	0.56831	0.894076	0.128993	0.744257	0.000172198	0.000658383	0.280027	0.000822163	0.00284318	0.336505	1	BASELINE
FBgn0020370	TppII	2R:9040390-9046646	-	Known	YES	0.000872623	0.563868	0.891317	0.332781	0.858961	0	0	0.402147	5.45009e-10	5.20733e-09	1	1	BASELINE
FBgn0020371	Tim17b2	2L:15484729-15485545	+	Known	YES	0.000461255	0.674825	0.956331	0.711585	0.959436	0.014372	0.0359819	0.151483	1	1	0.0789174	0.560931	NONE
FBgn0020372	TM4SF	2R:19765720-19768383	+	Known	YES	0.000265093	0.750458	0.996144	0.420558	0.889171	4.42711e-09	2.59041e-08	0.344393	0.000529404	0.00191574	0.0917899	0.60795	BASELINE
FBgn0020376	Sr-CIII	2L:4120343-4121627	+	Known	RARE	0.00291701	0.291113	0.666951	0.420937	0.889425	0.195752	0.303841	0.118123	0.0117383	0.0308716	1	1	NONE
FBgn0020377	Sr-CII	2R:8096398-8099660	-	Known	YES	0.00419847	0.205183	0.562807	0.820754	0.976739	0.922066	0.946987	0.148566	0.00405117	0.0119175	1	1	BASELINE
FBgn0020378	Sp1	X:9623681-9650402	+	Known	YES	0.0111162	0.0389147	0.209971	0.553164	0.931155	0	0	0.224812	0.18131	0.333266	0.0755732	0.549977	BASELINE
FBgn0020379	Rfx	3R:6187482-6203790	-	Known	YES	0.00445478	0.191857	0.545027	0.586924	0.939407	1.08018e-07	5.71119e-07	0.301845	0.000399461	0.00148841	0.282248	1	BASELINE
FBgn0020381	Dredd	X:527655-529578	-	Known	YES	0.000187941	0.788869	1	0.606797	0.942617	0.0422934	0.0895455	0.467013	2.86264e-15	5.0434e-14	0.999999	1	BASELINE
FBgn0020385	pug	3R:6522256-6529038	+	Known	YES	0.0199991	0.0055007	0.0526769	0.421098	0.889425	0	0	0.691281	2.66781e-13	3.73303e-12	0.00024818	0.0139805	BOTH
FBgn0020386	Pdk1	3L:129450-145895	+	Known	YES	0.0151388	0.0158481	0.114046	0.0729005	0.696501	6.01193e-08	3.23636e-07	0.357726	7.60308e-10	7.11637e-09	0.999999	1	BASELINE
FBgn0020388	Gcn5	3L:12514229-12517114	-	Known	YES	0.0693135	1.65051e-07	6.99576e-06	0.299044	0.844434	3.32031e-08	1.82044e-07	0.338077	0.000787275	0.0027375	0.0906097	0.602872	BOTH
FBgn0020389	Papss	3L:19838393-19854025	+	Known	YES	0.00334926	0.257919	0.629131	0.866488	0.983761	8.98864e-05	0.000356609	0.292925	0.000113166	0.00047815	0.486276	1	BASELINE
FBgn0020391	Nrk	2R:9047568-9050989	+	Known	YES	0.000344644	0.716877	0.979878	0.139102	0.750405	0.00726639	0.0199591	0.289229	0.00039373	0.00146918	0.361008	1	BOTH
FBgn0020392	Nmt	3L:8169235-8171529	-	Known	YES	0.000486673	0.66651	0.951208	0.492798	0.913263	0	0	0.395815	0.000106433	0.000452153	0.0420519	0.409371	BASELINE
FBgn0020399	Mst89B	3R:12092734-12094155	+	Known	YES	0.0001029	0.842937	1	0.234647	0.813008	0.0254751	0.0585804	0.0536195	0.518025	0.773037	0.827292	1	NONE
FBgn0020407	asun	3R:12089993-12092613	+	Known	YES	0.00801451	0.0797564	0.330735	0.0676079	0.688197	0	0	0.268152	7.45041e-05	0.00032631	0.760344	1	BASELINE
FBgn0020412	JIL-1	3L:11071852-11086293	-	Known	YES	3.52022e-05	0.907742	1	0.540221	0.928326	4.10783e-15	3.94606e-14	0.225063	0.0359397	0.0832724	0.213502	0.899143	ETOH
FBgn0020414	Idgf3	2L:16450907-16455194	+	Known	YES	0.00794971	0.0809892	0.334029	0.183584	0.780444	9.50218e-08	5.04795e-07	0.867861	9.82595e-41	2.11176e-38	0.520911	1	BOTH
FBgn0020415	Idgf2	2L:16447330-16450508	+	Known	YES	0.000178327	0.794216	1	0.509678	0.918456	0.201191	0.310272	0.821939	1.50305e-25	7.72895e-24	0.000941387	0.0376184	BOTH
FBgn0020416	Idgf1	2L:16445278-16446793	+	Known	YES	0.0126538	0.0275142	0.16642	0.98566	0.997699	0.00209564	0.0065784	0.718105	1.87616e-18	4.6082e-17	0.0112956	0.195816	BOTH
FBgn0020429	GluRIIB	2L:5559342-5563502	+	Known	YES	0.00942979	0.0572765	0.269139	0.581074	0.938062	0.52159	0.634866	0.141328	0.00187668	0.00597185	1	1	NONE
FBgn0020440	Fak	2R:15318164-15324764	-	Known	YES	0.0134653	0.0229547	0.147349	0.201246	0.792872	0	0	0.148733	0.0105922	0.02816	0.996227	1	BASELINE
FBgn0020443	eRF3	2L:12434452-12441279	+	Known	YES	0.000361145	0.710476	0.976653	0.172595	0.772636	3.9968e-15	3.84492e-14	0.227008	0.0107169	0.0284484	0.35175	1	BASELINE
FBgn0020445	E23	2L:3334875-3354829	-	Known	YES	9.78023e-05	0.846828	1	0.0330312	0.664932	0	0	0.385429	9.66884e-06	4.99718e-05	0.158849	0.787247	BOTH
FBgn0020493	Dad	3R:12879729-12896130	+	Known	YES	0.000108171	0.839019	1	0.772727	0.968685	2.05278e-05	8.79696e-05	0.403678	0.000556808	0.00200625	0.0123684	0.205305	BOTH
FBgn0020496	CtBP	3R:8837371-8851997	+	Known	YES	0.00185119	0.400481	0.769318	0.0193295	0.649816	0	0	0.282211	0.00446325	0.0129895	0.165384	0.800607	BASELINE
FBgn0020497	emb	2L:8403573-8408853	+	Known	YES	1.93264e-05	0.931572	1	0.335153	0.859692	0	0	0.305867	0.0175474	0.0441443	0.0406629	0.401393	BASELINE
FBgn0020503	CLIP-190	2L:17384700-17409698	+	Known	YES	0.00084772	0.569486	0.894797	0.655796	0.950915	0.409964	0.530597	0.488529	1.19924e-09	1.09228e-08	0.193967	0.860247	BOTH
FBgn0020506	Amyrel	2R:12538600-12540204	-	Known	YES	0.000283922	0.742052	0.992161	0.152988	0.761071	4.79172e-13	3.78326e-12	0.484742	8.61684e-05	0.000373107	0.00102047	0.0399425	BOTH
FBgn0020508	Ag5r2	X:14676995-14678085	-	Known	YES	0.0109298	0.0405987	0.215441	0.136038	0.749788	0.0325027	0.0718007	0.777348	2.12374e-11	2.39337e-10	4.30746e-11	1.64109e-08	BOTH
FBgn0020509	Acp62F	3L:2739750-2740228	+	Known	YES	0.00187671	0.397249	0.766824	0.565039	0.93498	0.000289577	0.00107089	0.103484	1	1	0.152004	0.770114	NONE
FBgn0020510	Abi	3R:9944984-9948142	-	Known	YES	0.0147955	0.0170942	0.120442	0.861552	0.983479	1.33227e-14	1.22201e-13	0.379407	0.00162681	0.00526266	0.0158065	0.237218	BOTH
FBgn0020513	Paics	X:12651069-12654650	-	Known	YES	0.00029676	0.736495	0.989322	0.560118	0.93371	0	0	0.516828	2.44773e-12	3.07936e-11	0.448293	1	BOTH
FBgn0020518	snoRNA:Me28S-G764	3L:22862645-22862722	-	Known	YES	0	1	1	0.880957	0.985514	0.0154292	0.0382206	0.221233	0.999999	1	0.00683751	0.142918	BASELINE
FBgn0020521	pio	2R:20468768-20485385	+	Known	YES	0.00771689	0.0855902	0.344488	0.425902	0.890892	0	0	0.450591	1.49792e-05	7.50236e-05	0.0157896	0.23707	BOTH
FBgn0020545	kraken	2L:852768-854539	+	Known	YES	0.00413552	0.20862	0.568232	0.833837	0.978695	7.08056e-12	5.0838e-11	0.522274	1.84486e-15	3.3254e-14	1	1	BOTH
FBgn0020546	lncRNA:iab4	3R:12675726-12682219	+	Known	RARE	0.000496819	0.663263	0.949295	0.694047	0.955858	0.690742	0.775653	0.0424888	0.855762	1	0.70819	1	NONE
FBgn0020556	lncRNA:bxd	3R:12567847-12598911	-	Known	RARE	0.0167695	0.0110839	0.0882743	0.886857	0.985863	0.689514	0.774657	0.0528588	0.469767	0.71649	0.871418	1	NONE
FBgn0020616	SA	2L:6950421-6954586	+	Known	YES	0.000539687	0.649963	0.941901	0.281741	0.836697	0	0	0.257218	0.000772198	0.00269009	0.505592	1	BASELINE
FBgn0020617	Rx	2R:16804258-16824535	+	Known	YES	0.00592713	0.132076	0.44429	0.748023	0.965945	0.000308642	0.00113725	0.0339103	0.449036	0.692208	1	1	NONE
FBgn0020618	Rack1	2L:7825347-7827315	-	Known	YES	0.0662491	3.15839e-07	1.24286e-05	0.181085	0.779905	0.271914	0.390048	0.138342	0.00216069	0.00678165	1	1	NONE
FBgn0020620	RN-tre	2R:9872320-9878212	-	Known	YES	0.000173619	0.79689	1	0.717612	0.96042	5.69674e-11	3.79889e-10	0.271182	2.94422e-05	0.000139659	0.874447	1	BASELINE
FBgn0020621	Pkn	2R:5139815-5172602	-	Known	YES	0.00499832	0.166781	0.506079	0.607469	0.942662	0	0	0.456447	7.73204e-13	1.03033e-11	0.999999	1	BOTH
FBgn0020622	Pi3K21B	2L:297880-305233	+	Known	YES	5.42704e-05	0.885586	1	0.12629	0.742215	0	0	0.544102	3.77818e-12	4.64336e-11	0.20746	0.886845	BOTH
FBgn0020626	Osbp	3R:20760591-20763944	-	Known	YES	0.0132893	0.0238727	0.151215	0.221295	0.808481	0.000248859	0.000930681	0.120747	0.00848333	0.0230917	1	1	BASELINE
FBgn0020633	Mcm7	3L:8884696-8887410	+	Known	YES	0.00170694	0.419487	0.784478	0.0109863	0.640933	0	0	0.356194	2.7439e-05	0.000131028	0.221764	0.913401	BOTH
FBgn0020637	Lcp65Ag2	3L:6126090-6126693	-	Known	YES	0.000188509	0.788557	1	0.889876	0.985986	0.167892	0.269365	0.525301	7.27469e-10	6.82233e-09	0.0734279	0.541416	BOTH
FBgn0020638	Lcp65Ag1	3L:6127797-6128374	-	Known	YES	0.00121099	0.496564	0.844826	0.901734	0.988398	0.209534	0.319899	0.411644	1.81963e-06	1.0701e-05	0.146133	0.755907	BOTH
FBgn0020639	Lcp65Af	3L:6129315-6129891	-	Known	YES	0.000744358	0.59404	0.908859	0.739012	0.963859	0.231756	0.345915	0.384842	6.58139e-05	0.000291601	0.0746466	0.546773	BOTH
FBgn0020640	Lcp65Ae	3L:6130683-6131218	-	Known	RARE	7.24107e-05	0.867992	1	0.595716	0.941087	0.968489	0.979241	0	1	1	1	1	NONE
FBgn0020641	Lcp65Ad	3L:6136495-6137201	+	Known	RARE	0.00131384	0.478816	0.832797	0.478561	0.90767	0.376121	0.496773	0.111343	0.0151144	0.0386826	0.999999	1	NONE
FBgn0020642	Lcp65Ac	3L:6137919-6138493	+	Known	YES	0.0165132	0.0117221	0.0919103	0.545804	0.929809	0.544478	0.65431	0.302423	0.00297529	0.00903065	0.122789	0.699297	ETOH
FBgn0020645	Lcp65Aa	3L:6144404-6144903	+	Known	RARE	7.6621e-05	0.864244	1	0.376584	0.874521	0.479762	0.597292	0.296777	0.0291935	0.0693415	0.0379325	0.386436	BOTH
FBgn0020646	Lcp65APsi	3L:6141453-6141715	+	Known	RARE	0.00640496	0.117423	0.416026	0.189149	0.785697	0.741883	0.815403	0.172784	1	1	0.0223769	0.289371	ETOH
FBgn0020647	KrT95D	3R:19823260-19857549	-	Known	YES	0.051357	7.29656e-06	0.000205746	0.717155	0.960381	0.348441	0.469255	0.533999	1.69978e-14	2.72852e-13	0.771759	1	BOTH
FBgn0020653	Trxr-1	X:8136561-8142066	+	Known	YES	0.000117494	0.832323	1	0.0828978	0.703445	0.000619998	0.00216705	0.117389	0.0101359	0.0270692	1	1	NONE
FBgn0020655	ArfGAP1	3L:12408126-12410680	-	Known	YES	0.00727762	0.0950577	0.366659	0.0444797	0.673536	9.38097e-07	4.57727e-06	0.131573	0.0153657	0.0392328	1	1	BASELINE
FBgn0020660	eIF4B	2RHet:2901758-2917360	+	Known	YES	-1.11022e-16	1	1	0.27137	0.830671	0	0	0.0183371	0.666214	0.934216	1	1	NONE
FBgn0020762	Atet	2L:4333913-4345776	+	Known	YES	0.0519178	6.48497e-06	0.000185513	0.102686	0.720935	0.0651092	0.127086	0.711679	2.64579e-15	4.68597e-14	0.000586231	0.0265962	BOTH
FBgn0020764	Alas	2R:19852295-19854280	+	Known	YES	0.00112022	0.513166	0.857791	0.373999	0.874328	0.0269854	0.0614315	0.241441	3.52023e-05	0.000164538	0.999999	1	BASELINE
FBgn0020765	Acp65Aa	3L:6145150-6145845	-	Known	YES	0.00546827	0.148084	0.475103	0.170863	0.771457	0.605201	0.706689	0.232156	7.25564e-06	3.83872e-05	1	1	BASELINE
FBgn0020766	Aats-phe	2R:9855813-9857407	+	Known	YES	0.0150831	0.016044	0.115049	0.428413	0.891567	0.837437	0.88692	0.209316	1.65945e-05	8.24245e-05	1	1	ETOH
FBgn0020767	Spred	2R:10647151-10656928	-	Known	YES	0.00466739	0.181563	0.529953	0.243706	0.817469	4.84279e-13	3.81998e-12	0.502993	4.40181e-16	8.52075e-15	1	1	BOTH
FBgn0020880	CG7179	2L:7775804-7778029	-	Known	YES	0.00203676	0.377809	0.750981	0.369044	0.872693	0.534307	0.645793	0.133881	0.0985071	0.199111	0.631725	1	NONE
FBgn0020887	Su(z)12	3L:19911342-19916562	-	Known	YES	0.0100141	0.0500541	0.246789	0.645758	0.948275	3.13396e-05	0.000131593	0.516219	3.75582e-07	2.44841e-06	0.00652014	0.138706	BOTH
FBgn0020906	Jon25Bi	2L:4954279-4955144	-	Known	YES	0.00447738	0.190732	0.543334	0.100901	0.718335	0.0779521	0.146968	0.698561	1.29433e-12	1.68002e-11	4.56307e-05	0.00340726	BOTH
FBgn0020907	Scp2	3R:12400265-12409385	-	Known	YES	0.00378539	0.229031	0.594281	0.107801	0.72385	3.55271e-15	3.43545e-14	0.643216	4.39035e-20	1.28107e-18	0.696241	1	BOTH
FBgn0020908	Scp1	2RHet:1707564-1743021	-	Known	YES	2.22045e-16	1	1	0.282711	0.837261	0.456319	0.575351	0.458262	6.25023e-13	8.38876e-12	1	1	BOTH
FBgn0020909	Rtc1	X:13651212-13652631	+	Known	YES	0.000549239	0.647087	0.940599	0.803594	0.973846	0	0	0.362822	3.03823e-07	2.00992e-06	0.637594	1	BOTH
FBgn0020910	RpL3	3R:7047616-7050895	+	Known	YES	0.0357202	0.000195206	0.00351297	0.662319	0.951612	0.00454037	0.0132039	0.18448	0.000225265	0.000888004	1	1	ETOH
FBgn0020912	Ptx1	3R:26738476-26756404	+	Known	YES	0.000738262	0.595556	0.909827	0.441576	0.895551	0	0	0.189305	0.00170129	0.00547297	0.974076	1	BASELINE
FBgn0020930	Dgkepsilon	2R:8645051-8647229	+	Known	YES	0.00472166	0.179039	0.526179	0.0596238	0.685423	9.33326e-05	0.000369407	0.179815	0.0189139	0.0472022	0.602501	1	NONE
FBgn0021738	Crg-1	X:3687256-3691372	+	Known	YES	0.142467	1.89728e-14	3.01469e-12	0.637669	0.947423	0.0115926	0.0299073	0.189494	0.000150995	0.000620317	1	1	NONE
FBgn0021742	C901	X:10858065-10861167	-	Known	RARE	6.4405e-05	0.87544	1	0.328573	0.856255	0.73388	0.809396	0.123318	0.580302	0.842644	0.28086	1	NONE
FBgn0021750	SerRS-m	3R:11166389-11168940	+	Known	YES	0.00290588	0.292037	0.668017	0.0830905	0.703964	1.32561e-13	1.10328e-12	0.275932	2.20926e-06	1.28282e-05	1	1	BASELINE
FBgn0021760	chb	3L:21165953-21176378	+	Known	YES	0.00284064	0.297527	0.674409	0.873041	0.984451	4.44089e-16	4.71912e-15	0.179868	0.00957132	0.0257212	0.733408	1	BASELINE
FBgn0021761	Nup154	2L:11004820-11010921	+	Known	YES	0.000132417	0.82216	1	0.636396	0.946846	0	0	0.277929	0.0103988	0.0277008	0.121098	0.694602	BASELINE
FBgn0021764	sdk	X:580867-643529	+	Known	YES	0.000358707	0.711411	0.976919	0.490395	0.912726	2.18233e-09	1.30333e-08	0.272007	8.92934e-07	5.49411e-06	1	1	BASELINE
FBgn0021765	scu	X:17985292-17986886	+	Known	YES	0.0138755	0.0209544	0.138513	0.0861122	0.707386	0.254512	0.371041	0.206195	0.000216082	0.000856231	1	1	ETOH
FBgn0021767	org-1	X:8341724-8349102	-	Known	YES	0.00625613	0.121785	0.424569	0.431847	0.892177	8.42788e-08	4.49791e-07	0.338736	0.00120277	0.00400849	0.0721892	0.53664	BOTH
FBgn0021768	nudC	3L:16798094-16812632	+	Known	YES	0.00131685	0.478312	0.832453	0.0557768	0.683125	0	0	0.337703	0.000130508	0.000543342	0.194719	0.861844	BASELINE
FBgn0021776	mira	3R:15757521-15760842	-	Known	YES	0.00697054	0.102348	0.383509	0.347754	0.864896	4.32543e-13	3.42964e-12	0.571482	4.26474e-08	3.20018e-07	0.00113219	0.0430374	BOTH
FBgn0021795	Tapdelta	2R:7257805-7258840	-	Known	YES	1.13949e-05	0.947431	1	0.402976	0.881778	0.184883	0.290681	0.464608	5.0904e-13	6.91795e-12	1	1	BOTH
FBgn0021796	Tor	2L:13004480-13013197	+	Known	YES	0.0282403	0.000946833	0.0129315	0.962025	0.994968	0.000947448	0.00320431	0.333592	0.000269819	0.00104593	0.162324	0.795546	BOTH
FBgn0021800	Reph	2L:3803545-3810671	+	Known	YES	0.00166031	0.425916	0.79033	0.756369	0.966948	0	0	0.616041	4.5536e-10	4.38702e-09	0.000986668	0.0388263	BOTH
FBgn0021814	Vps28	2R:3966374-3967546	-	Known	YES	0.000794907	0.581772	0.901886	0.0987363	0.717748	0.199228	0.308138	0.0780923	0.0754753	0.158421	1	1	NONE
FBgn0021818	cnk	2R:13301475-13307512	-	Known	YES	0.00936014	0.0582081	0.271992	0.263883	0.828972	1.36016e-11	9.51911e-11	0.305985	1.13946e-05	5.82804e-05	0.685179	1	BASELINE
FBgn0021825	DCTN2-p50	2R:4779337-4780844	+	Known	YES	0.028537	0.000889144	0.0122828	0.00418082	0.608945	0.00158564	0.00511937	0.0646932	0.138205	0.265749	0.999999	1	NONE
FBgn0021847	l(2)k14710	2R:2097287-2101627	-	Known	YES	0.0035936	0.241224	0.609688	0.0369277	0.669831	0	0	0.245934	0.000174185	0.000705984	0.834437	1	BASELINE
FBgn0021856	l(2)k14505	2L:21261168-21262411	+	Known	YES	0.00361402	0.239889	0.607961	0.053857	0.680656	4.83687e-07	2.41851e-06	0.184107	0.00173174	0.00556292	1	1	BASELINE
FBgn0021872	Xbp1	2R:17031050-17033255	+	Known	YES	0.000413013	0.691378	0.966162	0.127515	0.743754	3.90964e-06	1.79575e-05	0.390399	2.47388e-13	3.47472e-12	1	1	ETOH
FBgn0021874	Nle	2L:566366-568121	-	Known	YES	0.000105041	0.841333	1	0.222253	0.80891	3.10567e-10	1.96841e-09	0.345546	2.91232e-09	2.52043e-08	1	1	BOTH
FBgn0021875	Zfrp8	2R:20021512-20022928	+	Known	YES	1.32444e-05	0.943332	1	0.266566	0.829392	0.000211216	0.000797645	0.396785	4.97797e-10	4.77121e-09	1	1	BOTH
FBgn0021895	ytr	2R:19734684-19739003	-	Known	YES	0.0152409	0.0154961	0.11226	0.254174	0.823558	0.241941	0.357062	0.125972	0.643357	0.909658	0.243852	0.952983	NONE
FBgn0021906	RFeSP	2L:1612429-1614160	-	Known	YES	1.49634e-08	0.998094	1	0.696213	0.956558	2.86121e-07	1.46117e-06	0.29626	2.70793e-06	1.54692e-05	0.98697	1	BASELINE
FBgn0021944	Coprox	2L:6964421-6965887	+	Known	YES	0.0531975	4.95457e-06	0.00014584	0.0694321	0.689315	1.96017e-06	9.28317e-06	0.266721	0.166876	0.310895	0.0234847	0.296786	ETOH
FBgn0021967	ND-PDSW	2L:3466157-3467334	+	Known	YES	0.000984211	0.539934	0.874688	0.613784	0.943371	8.13658e-10	5.02128e-09	0.286276	4.42651e-07	2.85619e-06	0.999999	1	BASELINE
FBgn0021979	l(2)k09913	2R:18954719-18959398	+	Known	YES	0.00159847	0.434673	0.79788	0.41084	0.885285	0.241356	0.356404	0.618375	1.16999e-21	4.03563e-20	1	1	BOTH
FBgn0021995	Rs1	2R:4051069-4055274	+	Known	YES	0.00331597	0.260303	0.631832	0.532475	0.925939	0	0	0.497078	1.7328e-15	3.13522e-14	1	1	BOTH
FBgn0022023	eIF3h	2L:5051193-5053094	-	Known	YES	0.014499	0.0182511	0.126166	0.499509	0.915432	0.0254766	0.0585804	0.301899	1.08174e-09	9.91189e-09	1	1	ETOH
FBgn0022027	Vps25	2R:4512956-4513685	+	Known	YES	0.000376994	0.704483	0.973964	0.00250248	0.591391	1.72111e-05	7.43742e-05	0.173677	0.000323243	0.0012304	1	1	NONE
FBgn0022029	l(2)k01209	2R:13307912-13313184	+	Known	YES	0.000131981	0.822448	1	0.696712	0.95665	0	0	0.583345	1.80276e-15	3.25303e-14	0.433791	1	BOTH
FBgn0022069	Nnp-1	2L:13363308-13366189	-	Known	YES	2.7213e-05	0.918843	1	0.474786	0.906894	0	0	0.32955	8.79142e-05	0.000379832	0.267341	0.988767	BASELINE
FBgn0022097	Vha36-1	2R:11428940-11430003	+	Known	YES	0.0411872	6.18297e-05	0.00131868	0.465671	0.904715	0.571489	0.678279	0.26862	0.0152175	0.0389077	0.124525	0.704754	ETOH
FBgn0022153	l(2)k05819	2L:4394196-4400487	+	Known	YES	0.00124011	0.491428	0.841563	0.493167	0.913659	4.44089e-16	4.71912e-15	0.322017	0.00177524	0.00568305	0.0946975	0.617329	BASELINE
FBgn0022160	Gpo1	2R:11745257-11750260	-	Known	YES	6.88026e-05	0.871293	1	0.971843	0.996328	0	0	0.340372	7.48792e-08	5.42453e-07	1	1	BASELINE
FBgn0022213	Cse1	2L:16821156-16825207	-	Known	YES	0.00101485	0.53369	0.87113	0.151363	0.759899	0	0	0.278056	0.000738516	0.00258458	0.36147	1	BASELINE
FBgn0022224	ubl	2R:2697516-2698035	-	Known	YES	0.0355161	0.000203778	0.00363122	0.104705	0.722409	6.48481e-13	5.04601e-12	0.127221	0.400678	0.632822	0.346297	1	NONE
FBgn0022238	lolal	2R:14041600-14045697	-	Known	YES	0.00408566	0.211391	0.57205	0.889925	0.985986	9.21485e-15	8.57426e-14	0.202769	0.0369688	0.0853325	0.325311	1	NONE
FBgn0022246	Rpp30	2L:251039-252373	-	Known	YES	0.00558928	0.143661	0.4669	0.597934	0.941087	2.81518e-09	1.66761e-08	0.301801	0.000282007	0.00108877	0.317544	1	BOTH
FBgn0022288	l(2)09851	2R:1642022-1643832	+	Known	YES	0.018	0.00847821	0.0727351	0.97881	0.997334	0	0	0.363776	2.04772e-09	1.80288e-08	0.999999	1	BASELINE
FBgn0022338	dnk	3R:14806717-14808471	+	Known	YES	0.000641761	0.620682	0.925159	0.00198981	0.553473	1.9007e-13	1.55755e-12	0.433934	5.0217e-06	2.7336e-05	0.0500648	0.446444	BOTH
FBgn0022343	CG3760	2R:20825704-20827292	+	Known	YES	0.0170833	0.0103502	0.0839205	0.222536	0.80891	1.4687e-08	8.26892e-08	0.183497	0.000637196	0.00226378	1	1	NONE
FBgn0022344	CG10340	3R:12439120-12440113	-	Known	YES	0.017348	0.00977	0.0806693	0.177274	0.777785	5.35647e-06	2.429e-05	0.216715	0.000111612	0.000472236	1	1	BASELINE
FBgn0022349	CG1910	3R:27573365-27577616	+	Known	YES	0.0019587	0.387118	0.759079	0.226622	0.810415	0	0	0.33626	0.0018277	0.00583317	0.0623915	0.499067	BASELINE
FBgn0022355	Tsf1	X:18281117-18284377	+	Known	YES	0.00779141	0.0840876	0.341377	0.0902221	0.712867	4.44089e-15	4.25017e-14	0.686869	1.37012e-06	8.18824e-06	6.69134e-10	2.05817e-07	BOTH
FBgn0022359	Sodh-2	3R:6702106-6703979	+	Known	YES	0.0211468	0.00429648	0.0435586	0.968526	0.995801	1.0201e-11	7.2145e-11	0.933565	7.66295e-52	6.26623e-49	0.106805	0.654043	BOTH
FBgn0022361	Pur-alpha	4:578642-587883	+	Known	YES	0.00097283	0.542288	0.8757	0.0442105	0.67347	0	0	0.391014	5.70378e-10	5.43115e-09	0.999999	1	BOTH
FBgn0022382	Pka-R2	2R:5881395-5913547	-	Known	YES	0.00140466	0.463989	0.822293	0.5673	0.935667	0	0	0.411499	0.000213362	0.000846654	0.0164042	0.242177	BOTH
FBgn0022699	D19B	3L:6175276-6178020	-	Known	YES	0.00908689	0.062021	0.283217	0.162054	0.767515	8.61489e-12	6.1368e-11	0.228481	2.43196e-05	0.000117453	1	1	BASELINE
FBgn0022700	Cht4	2R:16952884-16954592	-	Known	YES	0.00738034	0.0927465	0.361253	0.862732	0.983664	1.08321e-08	6.15127e-08	0.604392	6.49706e-20	1.861e-18	1	1	BOTH
FBgn0022702	Cht2	3L:1752328-1755934	-	Known	YES	0.000576431	0.639061	0.935945	0.00989936	0.640933	0.0159409	0.0392994	0.804204	8.78721e-19	2.23019e-17	1.12496e-06	0.000150983	BOTH
FBgn0022708	Adk2	2R:19911730-19913400	+	Known	YES	0.00187833	0.397045	0.766649	0.746786	0.965393	0	0	0.252751	1.78616e-06	1.05227e-05	0.999999	1	BASELINE
FBgn0022709	Adk1	3L:12193422-12197182	-	Known	YES	0.000281398	0.74316	0.992825	0.359995	0.87001	0.011026	0.0286604	0.409569	5.14208e-08	3.82173e-07	0.429595	1	BOTH
FBgn0022710	Ac13E	X:15404910-15448311	-	Known	YES	0.00104224	0.528216	0.867773	0.738026	0.963859	0	0	0.314915	1.68378e-05	8.3571e-05	0.553259	1	BASELINE
FBgn0022720	zf30C	2L:9758342-9762375	+	Known	YES	0.00240558	0.337781	0.714182	0.112964	0.72805	0	0	0.255696	8.56673e-05	0.000371177	0.855824	1	BASELINE
FBgn0022724	Taf8	X:17996003-17997515	+	Known	YES	0.0172985	0.00987594	0.0811347	0.0142745	0.640933	1.36335e-13	1.13273e-12	0.249259	0.00112366	0.00376992	0.513789	1	BASELINE
FBgn0022740	HLH54F	2R:13644910-13648022	+	Known	YES	0.00279832	0.301159	0.67783	0.194026	0.788595	0.324335	0.444818	0.0204929	0.630215	0.896141	1	1	NONE
FBgn0022764	Sin3A	2R:8462745-8480422	-	Known	YES	0.00518109	0.159209	0.493808	0.779007	0.970529	2.78248e-10	1.76926e-09	0.245929	1.38287e-05	6.97404e-05	0.999999	1	BASELINE
FBgn0022768	Pp2C1	X:4574021-4580936	-	Known	YES	0.00210737	0.369659	0.744921	0.13637	0.749848	1.42195e-08	8.01513e-08	0.254621	0.000288678	0.00111209	0.674383	1	BASELINE
FBgn0022770	Peritrophin-A	X:20115721-20119277	+	Known	YES	0.0087992	0.066323	0.295383	0.959176	0.994485	2.64903e-05	0.000112258	0.121946	0.0229576	0.0561006	1	1	BASELINE
FBgn0022772	Orc1	2R:3409942-3413221	-	Known	YES	0.00198397	0.38407	0.756874	0.0435711	0.672871	5.04041e-14	4.3641e-13	0.38073	5.46981e-05	0.000246123	0.0912513	0.605818	BOTH
FBgn0022774	Oat	3L:19640380-19642951	-	Known	YES	0.00662493	0.111289	0.403677	0.782944	0.970529	0.774267	0.839768	0.871144	2.32413e-44	7.68764e-42	0.999999	1	BOTH
FBgn0022786	Hira	X:7616152-7619950	+	Known	YES	0.00125465	0.488899	0.840096	0.0670395	0.688197	0	0	0.331892	0.000677939	0.00239209	0.114634	0.675453	BASELINE
FBgn0022787	Hel89B	3R:11799020-11809173	+	Known	YES	0.00306118	0.279476	0.655304	0.706567	0.95864	0.033753	0.0740745	0.253925	1.46656e-06	8.72417e-06	1	1	BASELINE
FBgn0022800	Cad96Ca	3R:21023293-21034005	-	Known	YES	0.0067724	0.107373	0.395073	0.405766	0.883226	2.07023e-10	1.32593e-09	0.440969	2.25187e-10	2.25167e-09	0.737242	1	BOTH
FBgn0022893	Df31	2L:21626309-21629932	-	Known	YES	0.0126183	0.0277338	0.167101	0.0170635	0.643733	0	0	0.244267	0.00421488	0.0123309	0.366077	1	BASELINE
FBgn0022935	D19A	3L:6178930-6182223	-	Known	YES	0.0951646	6.5466e-10	4.56316e-08	0.0334694	0.664932	1.79146e-12	1.34836e-11	0.327192	5.74051e-05	0.000256753	0.321215	1	BASELINE
FBgn0022936	CycH	3L:21815097-21816409	+	Known	YES	0.00123034	0.493142	0.842523	0.0619472	0.685568	8.88178e-15	8.27354e-14	0.405994	4.14587e-05	0.000191089	0.0477187	0.436287	BOTH
FBgn0022942	Cbp80	X:4544048-4552292	+	Known	YES	0.000234374	0.764911	1	0.108125	0.723886	0	0	0.540789	1.09636e-11	1.28479e-10	0.170263	0.812074	BOTH
FBgn0022943	Cbp20	3R:13990383-13991161	+	Known	YES	0.0207944	0.00463469	0.0462187	0.0153009	0.640933	0	0	0.108816	0.0466905	0.104401	1	1	BASELINE
FBgn0022959	yps	3L:12114374-12118250	-	Known	YES	0.00323504	0.266211	0.639298	0.191046	0.78666	0.0445032	0.0933572	0.162668	0.000381401	0.0014281	1	1	NONE
FBgn0022960	vimar	2R:2862790-2873217	-	Known	YES	0.0164918	0.0117773	0.0921702	0.158594	0.764701	0	0	0.263787	0.00934544	0.0252113	0.178417	0.830085	BASELINE
FBgn0022981	rpk	3R:471703-474606	+	Known	YES	6.21587e-05	0.877614	1	0.447778	0.898165	0	0	0.857565	9.63046e-38	1.49482e-35	0.295958	1	BOTH
[truncated: 31,581 more rows]

## Sheet: B. Male_mixed_model_results
FlyBase Gene ID	Gene Symbol	Gene Locus	Gene Strand	TYPE	Expressed in DGRP	% Variance Explained by Alignment Bias	Alignment Bias Effect P-value	Alignment Bias Effect FDR	Wolbachia Effect P-value	Wolbachia Effect FDR	Treatment Effect P-value	Treatment Effect FDR	H2	Line Effect P-value	Line Effect FDR	Treatment by Line Effect P-value	Treatment by Line Effect FDR	Significant Treatment
FBgn0000003	7SLRNA:CR32864	3R:2648220-2648518	+	Known	YES	0.000273965	0.746457	0.948528	0.669426	0.966042	0	0	0.156088	0.000628109	0.00123888	1	1	NONE
FBgn0000008	a	2R:18024473-18060339	+	Known	YES	0.00218146	0.361367	0.625817	0.673954	0.967128	0.813398	0.874089	0.646802	1.80524e-16	9.73816e-16	0.103535	0.858868	BOTH
FBgn0000014	abd-A	3R:12632936-12655771	-	Known	YES	0.000423919	0.687542	0.908748	0.744175	0.975954	1.92369e-11	1.82901e-10	0.340989	3.37716e-09	1.02536e-08	0.999999	1	BASELINE
FBgn0000015	Abd-B	3R:12752932-12797958	-	Known	YES	0.009318	0.0587796	0.176897	0.113605	0.848499	3.12436e-06	1.63509e-05	0.225412	1.60298e-05	3.64122e-05	1	1	NONE
FBgn0000017	Abl	3L:16608966-16640982	-	Known	YES	0.000947151	0.547669	0.798903	0.368962	0.926955	0	0	0.113719	0.0108733	0.0185551	1	1	NONE
FBgn0000018	abo	2L:10973443-10975293	-	Known	YES	0.0171357	0.0102327	0.0446252	0.853175	0.986689	0.0168389	0.0421353	0.584411	4.75713e-18	2.95768e-17	1	1	BOTH
FBgn0000022	ac	X:264064-264980	+	Known	YES	0.000429425	0.685626	0.907664	0.216823	0.889828	0.904232	0.937635	0.250775	0.00386559	0.00698782	0.335977	1	BOTH
FBgn0000024	Ace	3R:9048673-9085239	-	Known	YES	0.0202542	0.00520631	0.0255186	0.261304	0.90079	2.41802e-09	1.84453e-08	0.829818	4.13394e-35	1.51713e-33	0.480141	1	BOTH
FBgn0000028	acj6	X:15244272-15273097	-	Known	YES	0.000167735	0.800288	0.983308	0.848357	0.98622	0.102	0.184969	0.334027	4.67565e-09	1.40361e-08	1	1	BOTH
FBgn0000032	Acph-1	3R:25816866-25819133	-	Known	YES	0.0192897	0.00641117	0.0304336	0.756498	0.977128	2.9233e-06	1.53609e-05	0.395845	1.73512e-11	6.24896e-11	1	1	BOTH
FBgn0000036	nAChRalpha1	3R:20219618-20282879	-	Known	YES	0.00454227	0.187541	0.407641	0.203652	0.885614	3.57137e-10	2.98476e-09	0.596132	9.86835e-13	3.91424e-12	0.0514168	0.602854	BOTH
FBgn0000037	mAChR-A	2R:20266153-20277817	-	Known	YES	0.000553117	0.645928	0.877935	0.915988	0.994823	6.18863e-10	5.04896e-09	0.587355	2.0056e-13	8.38914e-13	0.121498	0.927465	BOTH
FBgn0000038	nAChRbeta1	3L:4429349-4435993	+	Known	YES	0.0620644	7.64847e-07	1.03982e-05	0.014296	0.728283	0.0574609	0.116624	0.301594	4.08474e-05	8.9868e-05	0.549346	1	BASELINE
FBgn0000039	nAChRalpha2	3R:20311150-20316869	+	Known	YES	0.0356083	0.000199859	0.00154105	0.037528	0.771133	4.83727e-08	3.17616e-07	0.328771	5.41908e-07	1.38752e-06	0.893109	1	BOTH
FBgn0000042	Act5C	X:5794894-5799432	+	Known	YES	0.000423768	0.687595	0.908782	0.201773	0.883851	0.368964	0.497824	0.446709	0.000112739	0.000238455	0.00561396	0.151785	BOTH
FBgn0000043	Act42A	2R:1901415-1903194	-	Known	YES	0.0157955	0.0137177	0.0569491	0.944383	0.99671	0.188254	0.299728	0.664338	6.00228e-13	2.4243e-12	0.00137144	0.0548248	BOTH
FBgn0000044	Act57B	2R:16831526-16833936	+	Known	YES	0.013425	0.0231618	0.0865056	0.437516	0.937966	0.532049	0.65014	0.365173	7.26585e-09	2.14702e-08	1	1	BASELINE
FBgn0000045	Act79B	3L:21978310-21980290	+	Known	YES	0.00119376	0.499644	0.758261	0.48923	0.944258	0.169729	0.276407	0.43897	6.50814e-13	2.61948e-12	1	1	BASELINE
FBgn0000046	Act87E	3R:9251705-9254097	+	Known	YES	0.0119447	0.0322655	0.111975	0.100608	0.840948	1.50799e-05	7.15971e-05	0.499718	2.07325e-15	1.02008e-14	0.999999	1	BOTH
FBgn0000047	Act88F	3R:11265691-11267899	+	Known	YES	0.00115323	0.507021	0.764448	0.436043	0.937679	0.0358822	0.0792576	0.444487	2.24453e-05	5.04122e-05	0.0161761	0.304823	BOTH
FBgn0000052	Pfas	2L:6041181-6046050	-	Known	YES	0.023246	0.00273985	0.0148298	0.759274	0.977318	0.0287248	0.0660603	0.671168	6.16325e-14	2.68677e-13	0.00273333	0.0914196	BOTH
FBgn0000053	Gart	2L:7014623-7023898	-	Known	YES	0.00257003	0.321772	0.581306	0.752191	0.977119	8.48911e-09	6.09227e-08	0.665463	1.42387e-17	8.45359e-17	0.100326	0.847745	BOTH
FBgn0000054	Adf1	2R:2549770-2555590	+	Known	YES	0.00485646	0.172942	0.386515	0.720147	0.97329	0.689087	0.779422	0.0518501	0.24915	0.337112	1	1	NONE
FBgn0000055	Adh	2L:14615552-14618902	+	Known	YES	0.121535	2.05016e-12	6.67742e-11	0.901095	0.993777	1.25987e-08	8.87463e-08	0.754473	6.60479e-26	9.5311e-25	0.270239	1	BOTH
FBgn0000057	adp	2R:14039209-14041565	+	Known	YES	3.69272e-05	0.905519	1	0.0727471	0.81912	7.11679e-09	5.15479e-08	0.793778	1.69331e-30	3.85762e-29	0.395226	1	BOTH
FBgn0000061	al	2L:378112-387439	+	Known	YES	0.0124665	0.0286938	0.102232	0.474761	0.943323	0.0455892	0.0964107	0.00479197	1	1	0.947267	1	NONE
FBgn0000063	Mps1	3R:13496993-13499550	+	Known	YES	0.0213983	0.00407053	0.0207765	0.251682	0.896484	0.18182	0.291544	0.87296	4.64313e-43	3.7123e-41	0.827608	1	BOTH
FBgn0000064	Ald	3R:22079791-22087313	-	Known	YES	0.000698602	0.605615	0.846467	0.826342	0.983339	0	0	0.359979	9.90485e-10	3.12481e-09	0.999999	1	BASELINE
FBgn0000071	Ama	3R:2588315-2590983	+	Known	YES	0.00228444	0.35026	0.613154	0.929693	0.995397	0.3255	0.453626	0.276169	0.0138812	0.0233615	0.10839	0.878378	BOTH
FBgn0000075	amd	2L:19110154-19114110	+	Known	YES	0.00012447	0.827493	1	0.579952	0.955595	0.151988	0.253166	0.640184	1.62126e-21	1.45489e-20	1	1	BOTH
FBgn0000077	amx	X:9139948-9141369	-	Known	YES	0.000133646	0.82135	0.997103	0.083289	0.830382	0.284775	0.410885	0.142109	0.00165276	0.00310591	1	1	NONE
FBgn0000078	Amy-d	2R:13012269-13013874	+	Known	YES	0.00454251	0.18753	0.407641	0.318432	0.914401	0	0	0.874425	1.49524e-30	3.41566e-29	6.62303e-05	0.00449296	BOTH
FBgn0000079	Amy-p	2R:13006141-13007808	-	Known	YES	0.106743	5.29639e-11	1.43778e-09	0.888685	0.991787	0	0	0.879156	7.39484e-36	2.90771e-34	0.00870711	0.202904	BOTH
FBgn0000083	AnxB9	3R:16890963-16896639	+	Known	YES	0.00435201	0.197075	0.421301	0.0246518	0.759299	1.95117e-07	1.19338e-06	0.54405	5.49535e-17	3.09985e-16	1	1	BOTH
FBgn0000084	AnxB10	X:20065478-20067547	-	Known	YES	0.0015355	0.443874	0.708845	0.101402	0.841032	5.3646e-13	6.08241e-12	0.374201	7.4456e-10	2.37236e-09	1	1	BOTH
FBgn0000092	CG2650	X:2586765-2587919	-	Known	YES	1.5512e-05	0.938681	1	0.0270238	0.765253	0.0522499	0.10788	0.680431	8.51067e-20	6.29628e-19	0.215027	1	BOTH
FBgn0000094	Anp	3R:26035670-26036104	+	Known	YES	0.00188707	0.395947	0.66155	0.477271	0.943323	0.27061	0.395495	0.824085	6.10484e-32	1.60407e-30	0.152234	1	BOTH
FBgn0000097	aop	2L:2156484-2178754	-	Known	YES	0.0049836	0.167408	0.378192	0.42048	0.935077	1.21372e-07	7.61767e-07	0.374502	2.0418e-09	6.28332e-09	1	1	BOTH
FBgn0000099	ap	2R:1593707-1615030	-	Known	YES	0.0182641	0.00800577	0.0365561	0.63152	0.96236	4.44089e-16	6.85785e-15	0.852218	3.47772e-34	1.13822e-32	0.0625681	0.668057	BOTH
FBgn0000100	RpLP0	3L:22068967-22070587	+	Known	YES	0.0030308	0.281879	0.53411	0.13886	0.856759	6.78901e-12	6.80767e-11	0.230692	1.06212e-05	2.4474e-05	0.999999	1	ETOH
FBgn0000108	Appl	X:424534-473077	+	Known	YES	3.80208e-05	0.904136	1	0.186407	0.880184	0	0	0.324226	8.841e-06	2.05283e-05	0.556791	1	BASELINE
FBgn0000109	Aprt	3L:1883795-1885019	-	Known	YES	0.0433038	3.96333e-05	0.000367344	0.163496	0.868766	0.0278625	0.064426	0.457526	4.08414e-10	1.32751e-09	0.505282	1	BOTH
FBgn0000114	bru1	2L:12175004-12313438	+	Known	YES	0.040802	6.70433e-05	0.000583544	0.991334	0.999439	0.0356068	0.0787219	0.641763	1.49973e-24	1.87007e-23	1	1	BOTH
FBgn0000115	Arl1	3L:15976235-15977462	+	Known	YES	0.0174677	0.00951859	0.0421757	0.32207	0.916009	0.0214089	0.051719	0.337128	1.18299e-08	3.43758e-08	1	1	BOTH
FBgn0000116	Argk	3L:9041881-9059127	-	Known	YES	0.000762776	0.58951	0.833988	0.522631	0.947915	0.0194411	0.0476302	0.446392	1.11676e-11	4.08061e-11	1	1	BOTH
FBgn0000117	arm	X:1785434-1794679	-	Known	YES	0.00623788	0.122332	0.303435	0.18972	0.880734	2.8671e-07	1.71393e-06	0.228264	1.72753e-05	3.91328e-05	1	1	NONE
FBgn0000119	arr	2R:9341145-9370734	-	Known	YES	0.0567093	2.36578e-06	2.91106e-05	0.0980078	0.838938	0.0773124	0.148392	0.455734	7.1539e-14	3.10132e-13	1	1	BOTH
FBgn0000120	Arr1	2L:18078269-18081307	+	Known	YES	0.00252724	0.325839	0.585993	0.241067	0.894987	0.004103	0.0122823	0.63299	8.86185e-21	7.3008e-20	0.999999	1	BOTH
FBgn0000121	Arr2	3L:8640361-8642036	-	Known	YES	0.00286376	0.295566	0.550569	0.631475	0.96236	3.67597e-05	0.000164415	0.679204	6.66552e-18	4.08595e-17	0.0678227	0.699852	BOTH
FBgn0000137	ase	X:354780-357209	+	Known	RARE	0.00196427	0.386442	0.651737	0.684542	0.968537	0.483488	0.606927	0.310518	0.0304865	0.0488285	0.0235142	0.383304	BOTH
FBgn0000139	ash2	3R:20475847-20479098	+	Known	YES	0.0365022	0.000165584	0.00130646	0.102081	0.841166	0.106016	0.190752	0.563165	1.60634e-15	7.96882e-15	0.672057	1	BOTH
FBgn0000140	asp	3R:20579571-20586235	+	Known	YES	0.00577477	0.137166	0.328933	0.158933	0.865729	0.00551869	0.0159234	0.704396	6.73207e-18	4.12524e-17	0.0167861	0.31108	BOTH
FBgn0000146	aub	2L:10997819-11001476	-	Known	YES	0.0615516	8.52287e-07	1.14571e-05	0.429577	0.937679	0.000144337	0.000588856	0.551167	1.15483e-13	4.92185e-13	0.395892	1	BOTH
FBgn0000147	aurA	3R:7788846-7790548	+	Known	YES	0.00119431	0.499546	0.758215	0.687244	0.968909	0.62402	0.727417	0.712078	1.83459e-18	1.18541e-17	0.0170422	0.314611	BOTH
FBgn0000150	awd	3R:27570894-27571799	-	Known	YES	0.0247631	0.00198206	0.0112809	0.548889	0.950946	0.386555	0.515469	0.27398	5.11931e-07	1.31266e-06	1	1	ETOH
FBgn0000152	Axs	X:16574122-16577928	-	Known	YES	0.0227123	0.00307118	0.0163387	0.520703	0.947915	0	0	0.464921	7.25099e-13	2.90802e-12	0.999999	1	BOTH
FBgn0000153	b	2L:13821248-13823979	+	Known	YES	0.0138636	0.0210099	0.0800561	0.0760872	0.821479	0.477357	0.601237	0.50175	1.48897e-15	7.41286e-15	0.999999	1	BOTH
FBgn0000157	Dll	2R:20702345-20723190	+	Known	YES	0.000653746	0.617437	0.855051	0.0735473	0.81912	0	0	0.16916	0.0027338	0.00502112	1	1	NONE
FBgn0000158	bam	3R:21068761-21070779	-	Known	YES	0.0192803	0.00642419	0.0304824	0.225584	0.894339	0.00424981	0.0126653	0.253317	6.1408e-06	1.4464e-05	1	1	BASELINE
FBgn0000163	baz	X:17054039-17094738	+	Known	YES	0.0126978	0.0272446	0.0982046	0.0505622	0.790007	0	0	0.563538	2.31047e-18	1.47754e-17	1	1	BOTH
FBgn0000166	bcd	3R:2581564-2585188	-	Known	YES	0.00370388	0.23412	0.473599	0.353964	0.922959	0.0296103	0.0676612	0.104815	0.999999	1	0.173946	1	BASELINE
FBgn0000173	ben	X:13890378-13893838	+	Known	YES	0.000196644	0.784153	0.97284	1.04361e-14	3.50361e-10	0	0	0.26359	4.22605e-05	9.28397e-05	0.891477	1	ETOH
FBgn0000179	bi	X:4306889-4379680	+	Known	YES	0.0335032	0.000311401	0.00227768	0.173124	0.871818	4.13003e-14	5.28203e-13	0.0480431	0.268265	0.360579	1	1	NONE
FBgn0000180	bib	2L:9984645-9995538	+	Known	YES	0.00496025	0.168409	0.379727	0.481409	0.943323	3.68482e-06	1.90553e-05	0.718032	2.22091e-18	1.42243e-17	0.0105954	0.228253	BOTH
FBgn0000181	bic	2R:8757754-8759299	+	Known	YES	0.0163615	0.0121178	0.0513393	0.556056	0.951188	0.0399501	0.0864072	0.536163	5.62107e-19	3.81864e-18	0.999999	1	BOTH
FBgn0000182	BicC	2L:16042047-16048757	+	Known	YES	0.0142573	0.0192539	0.0746935	0.336871	0.920073	3.01315e-13	3.51485e-12	0.359469	6.77831e-09	2.00755e-08	1	1	BOTH
FBgn0000183	BicD	2L:17459605-17473215	-	Known	YES	0.000216213	0.773945	0.965527	0.187305	0.880184	1.17453e-11	1.14592e-10	0.528199	2.38803e-15	1.16657e-14	0.999999	1	BOTH
FBgn0000206	boss	3R:21787716-21792670	+	Known	YES	0.0048683	0.172418	0.385677	0.778264	0.97858	4.25837e-12	4.38265e-11	0.574141	2.07931e-14	9.38483e-14	0.32671	1	BOTH
FBgn0000210	br	X:1469165-1558902	+	Known	YES	0.00292681	0.290303	0.544389	0.295048	0.910006	1.04112e-10	9.20045e-10	0.280682	9.41623e-05	0.000200658	0.612535	1	BASELINE
FBgn0000212	brm	3L:15963182-15975969	-	Known	YES	1.77564e-06	0.979236	1	0.382247	0.928629	0	0	0.214152	1.14288e-05	2.62764e-05	1	1	NONE
FBgn0000216	Brd	3L:14965767-14966298	+	Known	YES	0.00604074	0.128417	0.313909	0.647768	0.964583	0.0922191	0.170926	0.0126557	0.765123	0.908613	1	1	NONE
FBgn0000221	brn	X:3998375-3999824	+	Known	YES	9.67514e-05	0.847643	1	0.616968	0.961699	0.0235804	0.0560414	0.389914	1.24176e-08	3.60182e-08	0.776569	1	BOTH
FBgn0000227	Bsg25A	2L:4683052-4684461	-	Known	YES	0.000247941	0.758407	0.955944	0.174608	0.872684	0.451901	0.57826	0.0206061	1	1	0.776069	1	NONE
FBgn0000228	Bsg25D	2L:5271728-5278548	-	Known	YES	0.0377736	0.000126721	0.00102909	0.774671	0.978388	0.971945	0.982067	0.443589	1.6347e-11	5.9006e-11	1	1	BOTH
FBgn0000229	bsk	2L:10247502-10250501	-	Known	YES	0.00413563	0.208614	0.436975	0.297724	0.910557	0	0	0.179057	0.000309108	0.000629043	1	1	NONE
FBgn0000233	btd	X:9588219-9591591	+	Known	YES	3.99676e-05	0.901725	1	0.377385	0.928536	0.00459913	0.0135738	0	1	1	1	1	NONE
FBgn0000239	bur	2L:21174182-21179683	-	Known	YES	0.00385182	0.224982	0.460272	0.67141	0.966104	0	0	0.343965	3.15862e-09	9.60922e-09	1	1	BOTH
FBgn0000241	bw	2R:19415328-19426022	-	Known	YES	0.00532258	0.153614	0.356215	0.24922	0.896484	0.131209	0.225721	0.760509	1.09804e-27	1.91842e-26	0.467347	1	BOTH
FBgn0000244	by	3R:5353960-5358733	-	Known	YES	0.0223024	0.00335293	0.0176089	0.059726	0.803469	0.967253	0.979389	0.612956	1.38493e-21	1.25658e-20	1	1	BOTH
FBgn0000246	c(3)G	3R:11615195-11618301	-	Known	YES	0.000912336	0.555125	0.805391	0.650495	0.964848	1.66861e-07	1.03108e-06	0.768029	1.19688e-30	2.77181e-29	0.95646	1	BOTH
FBgn0000247	ca	3R:25632533-25640769	+	Known	YES	0.027866	0.001025	0.00641437	0.771471	0.977966	4.47777e-11	4.10023e-10	0.307357	4.17447e-07	1.07805e-06	1	1	ETOH
FBgn0000250	cact	2L:16313036-16326207	-	Known	YES	0.0024814	0.330272	0.591054	0.226897	0.894606	0.000318174	0.00121591	0.339134	2.82379e-06	6.83605e-06	0.572204	1	BOTH
FBgn0000251	cad	2L:20770731-20783135	+	Known	YES	4.92548e-05	0.890967	1	0.093767	0.833784	0.845854	0.897228	0.319344	4.26687e-08	1.18738e-07	0.999999	1	ETOH
FBgn0000253	Cam	2R:8146903-8166314	+	Known	YES	0.00430151	0.1997	0.425071	0.113811	0.848499	1.35469e-12	1.47327e-11	0.205091	0.16043	0.226031	0.135798	0.974368	BASELINE
FBgn0000256	capu	2L:3872646-3902860	-	Known	YES	0.00127311	0.485716	0.746758	0.739159	0.975441	0.0163187	0.0409914	0.679791	2.23739e-22	2.2091e-21	0.676597	1	BOTH
FBgn0000257	car	X:19460052-19463434	+	Known	YES	0.000152406	0.809449	0.989097	0.663846	0.965644	7.24e-08	4.66081e-07	0.0145895	0.730851	0.873754	0.999999	1	NONE
FBgn0000259	CkIIbeta	X:11686566-11695620	+	Known	YES	0.00337361	0.256194	0.502209	0.685032	0.968578	0	0	0.18135	0.00175677	0.00329216	1	1	BASELINE
FBgn0000261	Cat	3L:18815704-18821288	+	Known	YES	0.0168635	0.0108585	0.0468676	0.853237	0.986689	1.42109e-14	1.91524e-13	0.748323	2.01482e-23	2.21452e-22	0.0880536	0.798067	BOTH
FBgn0000273	Pka-C1	2L:9682315-9699297	-	Known	YES	0.0970922	4.31492e-10	1.01431e-08	0.389296	0.929941	0.0581646	0.117803	0.296761	1.75779e-06	4.32335e-06	1	1	BASELINE
FBgn0000274	Pka-C2	3R:26521259-26522860	-	Known	YES	0.00147824	0.452506	0.716568	0.452112	0.940882	0.733707	0.814497	0.62393	1.43443e-18	9.35486e-18	0.614961	1	BOTH
FBgn0000276	CecA1	3R:26036596-26036995	+	Known	YES	0.00540442	0.15048	0.351352	0.818269	0.982376	2.13544e-05	9.95431e-05	0.908191	5.01803e-49	7.91106e-47	0.631376	1	BOTH
FBgn0000277	CecA2	3R:26037878-26038290	+	Known	YES	0.00964728	0.0544675	0.16702	0.255672	0.898166	0.00124844	0.00423531	0.771061	8.76944e-13	3.49155e-12	3.63785e-09	7.10226e-07	BOTH
FBgn0000278	CecB	3R:26039037-26039519	-	Known	YES	0.000609982	0.629471	0.864167	0.126527	0.85495	0.00584599	0.0167659	0.318387	5.36577e-08	1.48237e-07	1	1	BOTH
FBgn0000279	CecC	3R:26042206-26042660	+	Known	YES	6.31143e-06	0.960864	1	0.992966	0.999564	7.35153e-05	0.000315165	0.420793	4.30273e-06	1.02596e-05	0.0813258	0.768258	BOTH
FBgn0000280	Cec-Psi1	3R:26037249-26037475	+	Known	RARE	0.0101671	0.0483267	0.152391	0.798423	0.981445	0.0882462	0.165011	0.235296	0.167707	0.235258	0.0606151	0.658511	BASELINE
FBgn0000281	Cec2	3R:26038625-26038864	+	Known	YES	0.00142846	0.460224	0.723564	0.745413	0.97646	0.0886612	0.165621	0.270415	0.00284272	0.00521203	0.258607	1	BASELINE
FBgn0000283	Cp190	3R:11096154-11100963	-	Known	YES	0.00574455	0.138202	0.330896	0.776896	0.978534	5.30856e-07	3.05693e-06	0.126503	0.19293	0.267368	0.527889	1	NONE
FBgn0000286	Cf2	2L:4876891-4883107	-	Known	YES	0.00401764	0.215241	0.446795	0.814042	0.982269	3.35201e-08	2.24932e-07	0.953858	3.59688e-68	5.75159e-65	0.999999	1	BOTH
FBgn0000287	salr	2L:11358873-11373636	+	Known	YES	0.0627659	6.59547e-07	9.08433e-06	0.782072	0.9787	1.34322e-05	6.42523e-05	0.926218	1.47886e-51	3.24576e-49	0.285984	1	BOTH
FBgn0000289	cg	2R:10061198-10070343	+	Known	YES	0.0130619	0.0251146	0.0921291	0.770665	0.977966	1.61315e-12	1.74026e-11	0.462443	3.80375e-10	1.23937e-09	0.467798	1	BOTH
FBgn0000299	Col4a1	2L:5029609-5037279	+	Known	YES	3.78328e-05	0.904373	1	0.0395784	0.771133	0	0	0.43108	1.09046e-12	4.30946e-12	0.999999	1	BOTH
FBgn0000303	ChAT	3R:14531223-14558066	+	Known	YES	0.0108533	0.0413122	0.135224	0.711387	0.972408	6.23972e-07	3.55714e-06	0.588428	5.62213e-12	2.10188e-11	0.0375845	0.501824	BOTH
FBgn0000307	chif	2L:16342430-16352628	-	Known	YES	0.0137269	0.0216574	0.0819629	0.719025	0.973208	0.0170333	0.0425606	0.446453	7.45038e-09	2.19942e-08	0.326623	1	BOTH
FBgn0000308	chic	2L:5972115-5981018	-	Known	YES	0.00263356	0.315856	0.575009	0.208754	0.887102	1.58762e-14	2.13113e-13	0.146469	0.034149	0.0542618	0.765977	1	BASELINE
FBgn0000313	chp	3R:27029902-27036452	-	Known	YES	0.156253	8.2104e-16	4.10276e-14	0.131712	0.855742	1.08518e-11	1.06245e-10	0.622209	1.47696e-22	1.4867e-21	1	1	BOTH
FBgn0000316	cin	X:149707-152502	+	Known	YES	0.00476552	0.177028	0.392636	0.00591642	0.703237	1.9984e-15	2.92333e-14	0.133008	0.00337391	0.0061387	1	1	NONE
FBgn0000317	ck	2L:15044963-15057862	-	Known	YES	0.00136448	0.470456	0.732737	0.517791	0.947384	1.27694e-05	6.12858e-05	0.461111	7.844e-13	3.13573e-12	1	1	BOTH
FBgn0000318	cl	2L:5520135-5521382	+	Known	YES	0.0194503	0.00619246	0.0295494	0.45426	0.941937	0	0	0.766572	8.27417e-34	2.60644e-32	0.999999	1	BOTH
FBgn0000319	Chc	X:15722019-15729523	-	Known	YES	0.0118484	0.0329733	0.113879	0.0194098	0.743466	9.47238e-10	7.5536e-09	0.257426	4.4239e-06	1.05358e-05	0.999999	1	NONE
FBgn0000320	eya	2L:6527447-6546976	-	Known	YES	0.000224015	0.770015	0.963093	0.151911	0.863604	0	0	0.505055	3.52286e-09	1.06844e-08	0.0834569	0.776741	BOTH
FBgn0000326	clt	2R:17504566-17506584	-	Known	YES	0.0721671	9.00914e-08	1.47502e-06	0.139944	0.857169	3.48802e-08	2.33313e-07	0.447211	2.86098e-13	1.18221e-12	0.999999	1	BOTH
FBgn0000330	cm	X:6903039-6905178	-	Known	YES	0.0560772	2.70267e-06	3.28134e-05	0.118693	0.851603	6.25685e-10	5.09842e-09	0.0994812	0.0497605	0.0770169	1	1	NONE
FBgn0000337	cn	2R:3670302-3672572	-	Known	YES	0.0545917	3.69494e-06	4.34897e-05	0.365167	0.925725	0.610005	0.715952	0.196003	0.0388021	0.0611323	0.359092	1	ETOH
FBgn0000339	cni	2L:16309292-16310726	-	Known	YES	0.0277496	0.00105062	0.00654666	0.800634	0.981673	2.61943e-07	1.57175e-06	0.208387	2.46855e-05	5.52627e-05	1	1	BASELINE
FBgn0000346	comt	X:13153054-13156521	+	Known	YES	0.0175496	0.00935045	0.0415933	0.695392	0.970217	0.000371543	0.00139978	0.365294	2.57623e-08	7.29549e-08	0.935853	1	BASELINE
FBgn0000351	cort	2L:6674682-6676635	-	Known	YES	0.105556	6.86238e-11	1.84204e-09	0.988115	0.999388	0.769545	0.84203	0.497678	3.45099e-08	9.68304e-08	0.0450208	0.559304	BOTH
FBgn0000352	cos	2R:3269681-3274620	-	Known	YES	0.0579756	1.81183e-06	2.27359e-05	0.299694	0.911085	1.08469e-13	1.32419e-12	0.310059	8.39456e-07	2.11644e-06	1	1	BOTH
FBgn0000355	Cp15	3L:8721581-8722166	+	Known	YES	0.11068	2.23892e-11	6.38225e-10	0.943338	0.996582	0.0669712	0.132249	0.592675	2.46182e-14	1.10519e-13	0.183806	1	BOTH
FBgn0000356	Cp16	3L:8725044-8725699	+	Known	YES	3.86554e-05	0.903344	1	0.147553	0.860752	8.12778e-06	4.00727e-05	0.0404782	0.350205	0.457976	1	1	NONE
FBgn0000357	Cp18	3L:8719891-8720713	+	Known	YES	0.0150317	0.0162267	0.0650695	0.654766	0.965291	0.555271	0.670776	0.105068	0.802868	0.945545	0.29252	1	NONE
FBgn0000358	Cp19	3L:8722965-8723704	+	Known	YES	0.00300048	0.284303	0.537225	0.152394	0.864047	0.000230913	0.000906903	0.0857987	1	1	0.237337	1	NONE
FBgn0000359	Cp36	X:8373352-8374556	+	Known	YES	0.000950334	0.546997	0.798337	0.475305	0.943323	0.0744338	0.143987	0.132313	0.67476	0.814862	0.205306	1	NONE
FBgn0000360	Cp38	X:8375870-8377344	+	Known	YES	0.000306961	0.732175	0.939202	0.0608419	0.807362	0.0584729	0.118349	0.0773024	0.45553	0.578281	0.670447	1	NONE
FBgn0000370	crc	2L:21310866-21319527	+	Known	YES	0.0114268	0.0362683	0.122376	0.608069	0.959067	9.97155e-07	5.53995e-06	0.713949	0.0077475	0.0134833	4.23052e-18	2.73194e-15	BOTH
FBgn0000376	crm	X:2628281-2632806	-	Known	YES	0.00087551	0.563223	0.81236	0.289599	0.909259	0	0	0.11851	0.0292187	0.0469097	1	1	NONE
FBgn0000377	crn	X:2141627-2144016	-	Known	YES	0.0020087	0.381119	0.646707	0.0947119	0.833784	7.22605e-09	5.22942e-08	0.225404	5.24845e-05	0.000114414	0.999999	1	ETOH
FBgn0000382	csw	X:1988267-2009734	+	Known	YES	0.0531176	5.03858e-06	5.74517e-05	0.949455	0.997783	3.26012e-10	2.73759e-09	0.275308	1.14712e-06	2.86503e-06	1	1	BASELINE
FBgn0000384	cta	2L:22874548-22885683	+	Known	YES	0.000321919	0.725983	0.935117	0.528923	0.948654	0	0	0	1	1	1	1	NONE
FBgn0000394	cv	X:5584035-5587117	+	Known	YES	0.0404859	7.16481e-05	0.000618654	0.074279	0.81912	0.278833	0.404466	0.415019	3.32205e-12	1.26565e-11	1	1	ETOH
FBgn0000395	cv-2	2R:17242520-17266969	-	Known	YES	0.00827763	0.0749535	0.211668	0.0572044	0.803469	2.17493e-13	2.57463e-12	0.779504	1.50444e-16	8.16934e-16	1.35241e-06	0.000152909	BOTH
FBgn0000404	CycA	3L:11819819-11826678	-	Known	YES	0.0325583	0.000380065	0.00271361	0.320074	0.915612	5.46915e-05	0.000239045	0.416638	6.74495e-10	2.15628e-09	0.863696	1	BOTH
FBgn0000405	CycB	2R:18691026-18694453	-	Known	YES	0.00224692	0.354253	0.617549	0.362687	0.925394	0.000258816	0.00100765	0.379328	1.26627e-08	3.6707e-08	0.883627	1	BOTH
FBgn0000406	Cyt-b5-r	2L:16788774-16790721	-	Known	YES	0.000183331	0.791414	0.977334	0.925042	0.995075	0	0	0.685786	8.71979e-17	4.82628e-16	0.0193016	0.340413	BOTH
FBgn0000409	Cyt-c-p	2L:16719932-16722644	+	Known	YES	0.00720198	0.0967994	0.25629	0.12746	0.855545	2.61124e-13	3.06842e-12	0.454167	5.03651e-12	1.89094e-11	0.999999	1	BOTH
FBgn0000411	D	3L:14168710-14171720	-	Known	YES	0.104368	8.88937e-11	2.33755e-09	0.480029	0.943323	0.165431	0.271025	0.559906	3.88559e-17	2.22356e-16	0.999999	1	BOTH
FBgn0000412	D1	3R:5063805-5066376	-	Known	YES	2.68459e-06	0.97447	1	0.914152	0.994823	3.17191e-13	3.68723e-12	0.463924	3.53903e-13	1.45193e-12	1	1	BOTH
FBgn0000413	da	2L:10388105-10393228	+	Known	YES	0.00244378	0.33397	0.595102	0.0298792	0.771133	1.66731e-11	1.597e-10	0.116039	0.106457	0.155319	0.764672	1	NONE
FBgn0000414	Dab	3L:16705226-16717675	+	Known	YES	0.0176558	0.00913678	0.0408213	0.382077	0.928629	0	0	0.32105	1.16244e-06	2.902e-06	0.86287	1	BOTH
FBgn0000416	Sap-r	3R:26709186-26714784	-	Known	YES	3.94838e-06	0.969041	1	0.0596554	0.803469	0	0	0.350832	5.3172e-07	1.36226e-06	0.67908	1	BOTH
FBgn0000422	Ddc	2L:19116483-19120306	-	Known	YES	0.00899021	0.0634326	0.187143	0.068132	0.817718	0.00999045	0.0268298	0.846583	7.9563e-37	3.39051e-35	0.394262	1	BOTH
FBgn0000426	SmF	2R:8071349-8071815	-	Known	YES	0.0210551	0.00438207	0.0220714	0.394692	0.931301	0.00234846	0.00749309	0.482751	5.52343e-15	2.62232e-14	1	1	BOTH
FBgn0000427	dec-1	X:7761194-7767255	-	Known	YES	0.00600266	0.129631	0.315847	0.173812	0.871818	0.0117939	0.0309694	0.123257	0.0210098	0.0344167	0.999999	1	NONE
FBgn0000439	Dfd	3R:2617558-2628150	+	Known	YES	0.000188001	0.788835	0.97587	0.562958	0.95288	0.418069	0.546274	0.363909	1.18702e-08	3.4487e-08	1	1	BOTH
FBgn0000442	Pkg21D	2L:786153-790798	-	Known	YES	0.000262631	0.751581	0.951677	0.330628	0.917232	0.000431999	0.00160949	0.484728	1.09805e-10	3.72375e-10	0.391298	1	BOTH
FBgn0000447	Dhod	3R:4477113-4478638	-	Known	YES	0.0036996	0.234391	0.474004	0.960405	0.99797	0.0988889	0.180508	0.48825	2.63578e-14	1.18075e-13	1	1	BOTH
FBgn0000448	Hr3	2R:6091500-6124853	-	Known	YES	0.0592932	1.37245e-06	1.7691e-05	0.367783	0.926629	0.00195973	0.00636458	0.188879	0.00437926	0.00787235	0.802088	1	BASELINE
FBgn0000449	dib	3L:4062292-4064551	+	Known	YES	2.77133e-05	0.918103	1	0.424243	0.936743	0.310104	0.437797	0.181841	0.0885681	0.131134	0.314236	1	BASELINE
FBgn0000451	ect	3L:10183376-10194937	-	Known	YES	0.0457243	2.38354e-05	0.000234444	0.414287	0.935077	0.701297	0.789085	0.623528	3.07388e-23	3.29884e-22	1	1	BOTH
FBgn0000454	Dip-B	3R:9608010-9611398	+	Known	YES	0.0319234	0.000434547	0.00304231	0.616081	0.961686	8.04129e-10	6.46616e-09	0.745451	2.92109e-23	3.14191e-22	0.0928033	0.817811	BOTH
FBgn0000455	Dip-C	3R:8237531-8239481	-	Known	YES	0.0637588	5.34749e-07	7.53225e-06	0.960781	0.99797	8.28688e-05	0.00035225	0.891803	2.82139e-50	5.17718e-48	1	1	BOTH
FBgn0000459	disco	X:16104631-16110783	-	Known	YES	0.00429046	0.20028	0.425792	0.683478	0.968295	2.15417e-12	2.28643e-11	0.419398	5.88881e-08	1.62207e-07	0.342553	1	BOTH
FBgn0000463	Dl	3R:15128453-15151939	-	Known	YES	0.0059462	0.131454	0.319074	0.877668	0.990307	0.0236668	0.0561989	0.522394	9.49112e-09	2.77963e-08	0.029832	0.439065	BOTH
FBgn0000464	Lar	2L:19586623-19732069	+	Known	YES	0.00113531	0.510341	0.767282	0.190844	0.880734	0	0	0.420962	1.48267e-10	4.98178e-10	1	1	BOTH
FBgn0000473	Cyp6a2	2R:2667254-2668996	-	Known	YES	0.0191375	0.00662572	0.0312444	0.139308	0.856759	0.000816021	0.00288131	0.967674	2.13614e-57	9.82625e-55	1.42079e-05	0.00122021	BOTH
FBgn0000477	DNaseII	3R:13845097-13846883	+	Known	YES	0.0160748	0.0129028	0.0541257	0.743666	0.975934	4.72578e-12	4.82524e-11	0.680084	5.24372e-20	3.96229e-19	0.243858	1	BOTH
FBgn0000479	dnc	X:3070473-3237800	+	Known	YES	0.00716287	0.0977134	0.257856	0.00887871	0.713503	0	0	0.227539	1.6671e-05	3.78174e-05	1	1	BASELINE
FBgn0000482	dor	X:1559085-1562484	+	Known	YES	0.000680094	0.610433	0.84999	0.0600854	0.803469	3.96472e-12	4.10433e-11	0.163244	0.00077322	0.0015094	1	1	NONE
FBgn0000489	Pka-C3	3L:15918905-15947897	-	Known	YES	0.00452384	0.188441	0.408935	0.230882	0.894606	5.06484e-13	5.76396e-12	0.650055	5.10321e-17	2.88835e-16	0.130744	0.959307	BOTH
FBgn0000490	dpp	2L:2428372-2459823	+	Known	YES	0.0112213	0.0379977	0.126817	0.343634	0.921448	3.83217e-10	3.19104e-09	0.459162	2.63436e-11	9.35608e-11	0.795126	1	BOTH
FBgn0000492	Dr	3R:25382108-25390966	+	Known	YES	0.00150866	0.447889	0.71243	0.906868	0.994427	9.18651e-06	4.48988e-05	0.247188	0.00070112	0.00137569	0.601561	1	BOTH
FBgn0000497	ds	2L:640013-714983	-	Known	YES	0.00121585	0.495701	0.754938	0.98593	0.999388	0	0	0.705398	3.38931e-26	5.07641e-25	1	1	BOTH
FBgn0000499	dsh	X:11249914-11252757	+	Known	YES	0.0154509	0.0147966	0.0604906	0.856392	0.987187	2.66116e-10	2.2538e-09	0.431418	3.98395e-11	1.39515e-10	1	1	BOTH
FBgn0000500	Dsk	3R:15414-15982	-	Known	YES	0.00184853	0.400819	0.665817	0.0544199	0.801116	6.12695e-05	0.000265823	0.465788	3.36049e-09	1.02067e-08	0.258804	1	BOTH
FBgn0000504	dsx	3R:3750045-3793130	-	Known	YES	0.00618406	0.123961	0.306254	0.387551	0.929861	8.25505e-10	6.62852e-09	0.718263	4.24434e-16	2.21175e-15	0.000884598	0.0384777	BOTH
FBgn0000520	dwg	X:2621731-2624075	+	Known	YES	0.00182528	0.4038	0.668587	0.147674	0.860752	2.13498e-06	1.13789e-05	0.019033	0.654494	0.794085	0.999999	1	NONE
FBgn0000524	dx	X:6428032-6432608	+	Known	YES	0.0791596	2.03375e-08	3.70354e-07	0.0395988	0.771133	0.137709	0.234275	0.230045	3.44579e-05	7.62551e-05	1	1	NONE
FBgn0000527	e	3R:17055561-17062899	-	Known	YES	0.0127144	0.0271437	0.0979039	0.342418	0.921448	0.00157552	0.00521684	0.515395	7.10261e-11	2.44145e-10	0.208267	1	BOTH
FBgn0000529	bsh	2L:19765776-19769067	-	Known	YES	0.0120166	0.0317471	0.110645	0.337956	0.920697	0.63937	0.73966	0.152331	0.0185639	0.0306734	0.845522	1	BASELINE
FBgn0000533	ea	3R:11154451-11156130	+	Known	YES	0.00172077	0.417606	0.683326	0.589738	0.956711	0.523425	0.642739	0.334974	9.01524e-09	2.64695e-08	1	1	BOTH
FBgn0000535	eag	X:14849510-14904022	+	Known	YES	0.00472323	0.178967	0.395376	0.458638	0.94271	0	0	0.52036	2.7898e-15	1.35594e-14	1	1	BOTH
FBgn0000536	eas	X:16172361-16179651	+	Known	YES	0.00109709	0.517552	0.77369	0.234135	0.894606	2.02283e-12	2.15657e-11	0.413648	8.9196e-12	3.28277e-11	1	1	BOTH
FBgn0000541	E(bx)	3L:233926-246912	-	Known	YES	2.88101e-05	0.916504	1	0.0727909	0.81912	0.929986	0.954844	0.353853	7.91954e-06	1.84872e-05	0.342352	1	BOTH
FBgn0000542	ec	X:3705731-3751654	+	Known	YES	0.000424264	0.687421	0.908715	0.660196	0.965599	0	0	0.555604	4.74858e-19	3.24959e-18	0.999999	1	BOTH
FBgn0000543	ecd	3L:2263581-2265857	-	Known	YES	0.00748762	0.0903976	0.243414	0.131513	0.855742	2.19371e-07	1.3301e-06	0.47757	3.1003e-13	1.27866e-12	1	1	BOTH
FBgn0000546	EcR	2R:1975378-2056592	-	Known	YES	0.0490884	1.17552e-05	0.000123859	0.514077	0.947289	1.33188e-06	7.28834e-06	0.296034	0.00211586	0.00393175	0.167526	1	BOTH
FBgn0000547	ed	2L:4031377-4115749	+	Known	YES	0.000551075	0.646538	0.878301	0.872527	0.989829	0.0082655	0.0227357	0.628538	1.14508e-14	5.2942e-14	0.0603265	0.657192	BOTH
FBgn0000551	Edg78E	3L:21289863-21290903	-	Known	YES	0.00154173	0.442952	0.70793	0.714812	0.972534	0.483374	0.60692	0.140235	0.00218162	0.00404699	0.999999	1	NONE
FBgn0000552	Edg84A	3R:2510173-2510855	+	Known	RARE	0.00647817	0.115341	0.290737	0.569018	0.953485	0.654976	0.752263	0.109319	0.0232191	0.0377686	0.999999	1	NONE
FBgn0000556	Ef1alpha48D	2R:7778640-7783267	+	Known	YES	0.0002932	0.738023	0.943436	0.0832999	0.830382	0	0	0.668669	7.04916e-23	7.2879e-22	0.974106	1	BOTH
FBgn0000557	eEF1alpha2	3R:27564190-27569028	+	Known	YES	0.0269888	0.00123465	0.00753018	0.561746	0.952665	4.44089e-16	6.85785e-15	0.837228	4.00878e-25	5.31025e-24	5.76935e-05	0.00401107	BOTH
FBgn0000559	eEF2	2L:21677913-21682164	-	Known	YES	1.06871e-05	0.949088	1	0.178057	0.877312	0.21391	0.331214	0.593472	1.7119e-18	1.10784e-17	0.999999	1	BOTH
FBgn0000560	eg	3L:21801803-21810700	+	Known	YES	0.0147806	0.0171506	0.0681075	0.878486	0.990307	0.50738	0.628552	0.730041	5.64187e-22	5.34878e-21	0.0906017	0.811092	BOTH
FBgn0000562	egl	2R:19622427-19634352	-	Known	YES	0.0461542	2.1777e-05	0.000216161	0.199527	0.88363	0.00264554	0.00832313	0.613291	6.29466e-21	5.26987e-20	1	1	BOTH
FBgn0000564	Eh	3R:13272364-13274580	-	Known	YES	0.0024053	0.337809	0.5994	0.244959	0.894987	0.0325818	0.073289	0.269434	3.30282e-07	8.60157e-07	1	1	NONE
FBgn0000565	Eip71CD	3L:15504152-15506302	+	Known	YES	0.00296739	0.286979	0.540738	0.913891	0.994823	0.842172	0.894397	0.809864	5.12194e-25	6.72643e-24	0.00230027	0.0809789	BOTH
FBgn0000566	Eip55E	2R:14515423-14516900	+	Known	YES	0.0167791	0.0110605	0.0475963	0.364208	0.925635	2.69963e-08	1.83206e-07	0.663205	2.35436e-16	1.25372e-15	0.0454681	0.563401	BOTH
FBgn0000567	Eip74EF	3L:17551772-17612425	-	Known	YES	0.0044101	0.194106	0.417558	0.473065	0.943323	1.94388e-10	1.66607e-09	0.197131	3.37612e-05	7.47726e-05	1	1	NONE
FBgn0000568	Eip75B	3L:17944053-18057796	-	Known	YES	0.000250842	0.757042	0.955048	0.0371371	0.771133	0	0	0.304859	4.80028e-08	1.33053e-07	1	1	BASELINE
FBgn0000575	emc	3L:749400-753492	+	Known	YES	0.0726452	8.13942e-08	1.34443e-06	0.179173	0.877489	3.17379e-09	2.38796e-08	0.630934	1.01787e-14	4.72624e-14	0.0565091	0.632813	BOTH
FBgn0000576	ems	3R:9727575-9730342	+	Known	YES	0.00120512	0.49761	0.75651	0.141358	0.858169	0.00223222	0.00716306	0.0653551	0.13435	0.192075	1	1	NONE
FBgn0000577	en	2R:7411511-7415715	-	Known	YES	9.05581e-05	0.852543	1	0.993655	0.999564	1.57398e-08	1.0975e-07	0.658838	1.09702e-23	1.2441e-22	1	1	BOTH
FBgn0000578	ena	2R:15029137-15051210	+	Known	YES	0.0277594	0.00104844	0.00653668	0.684501	0.96852	0.00496783	0.0145203	0.421448	2.63705e-10	8.69351e-10	0.92916	1	BOTH
FBgn0000579	Eno	2L:1724768-1729636	-	Known	YES	0.00610637	0.126355	0.310371	0.774727	0.978388	0.0465677	0.0982387	0.433644	1.87611e-12	7.29754e-12	1	1	BOTH
FBgn0000581	E(Pc)	2R:7339548-7352775	+	Known	YES	0.00170284	0.420046	0.685914	0.199112	0.88363	0	0	0.14072	0.00297936	0.00545006	1	1	NONE
FBgn0000588	esc	2L:11827204-11829405	-	Known	YES	4.36951e-06	0.967433	1	0.00947558	0.713503	1.20195e-06	6.61507e-06	0.397305	0.00676437	0.0118696	0.00257385	0.0870392	BOTH
FBgn0000591	E(spl)m8-HLH	3R:21865962-21866730	+	Known	YES	0.00225144	0.353768	0.616991	0.343456	0.921448	0.325818	0.453986	0.00308213	0.94164	1	1	1	NONE
FBgn0000592	Est-6	3L:12181918-12183805	+	Known	YES	0.0125327	0.028271	0.10108	0.470386	0.943323	0.00130472	0.00440621	0.819764	6.76645e-33	1.94869e-31	0.319732	1	BOTH
FBgn0000594	Est-P	3L:12183833-12185628	+	Known	YES	0.00766274	0.0867003	0.236046	0.561529	0.952665	0.000759725	0.00270071	0.828366	1.03071e-17	6.20607e-17	1.13673e-09	2.4159e-07	BOTH
FBgn0000611	exd	X:15886501-15890542	+	Known	YES	0.00172934	0.416449	0.681959	0.0381051	0.771133	0	0	0.133546	0.00849165	0.0147022	1	1	NONE
FBgn0000615	exu	2R:16554932-16558588	-	Known	YES	0.00451166	0.189038	0.409785	0.591896	0.95702	0.00312835	0.00965703	0.709186	4.7238e-26	6.96335e-25	1	1	BOTH
FBgn0000617	e(y)1	X:17736194-17737381	+	Known	YES	0.017109	0.0102924	0.0448332	0.804738	0.981924	0.204538	0.319934	0.061036	0.161107	0.226843	1	1	NONE
FBgn0000618	e(y)2	X:11470151-11470653	-	Known	YES	0.000801557	0.580197	0.826672	0.070335	0.81912	0.000673559	0.00241589	2.42144e-16	1	1	1	1	NONE
FBgn0000625	eyg	3L:12455637-12461121	-	Known	YES	0.00776559	0.084605	0.231392	0.864681	0.988515	0	0	0.304346	2.64062e-07	6.92419e-07	1	1	ETOH
FBgn0000629	E(z)	3L:10627675-10631230	-	Known	YES	0.0506684	8.43322e-06	9.15872e-05	0.145413	0.859346	0.00033843	0.00128687	0.254983	0.000142688	0.000299204	0.781666	1	ETOH
FBgn0000633	CG17716	2R:9510549-9636872	+	Known	YES	0.00740567	0.0921859	0.247016	0.119282	0.851663	4.57928e-06	2.34139e-05	0.616462	1.91776e-11	6.88828e-11	0.00529932	0.146462	BOTH
FBgn0000635	Fas2	X:4026920-4100126	-	Known	YES	0.0133265	0.0236756	0.0879845	0.996951	0.999712	0.000687195	0.00246033	0.662768	2.59647e-14	1.16361e-13	0.00720135	0.177679	BOTH
FBgn0000636	Fas3	2L:18320102-18393441	+	Known	YES	0.0092383	0.0598766	0.179555	0.240726	0.894987	0.000115095	0.00047839	0.570445	3.61908e-14	1.6037e-13	0.317581	1	BOTH
FBgn0000639	Fbp1	3L:14087689-14091153	-	Known	YES	0.0163891	0.0120449	0.0511015	0.683707	0.968295	0.288478	0.414546	0.226257	0.000936107	0.00181001	0.738109	1	ETOH
FBgn0000640	Fbp2	2L:9426784-9427917	+	Known	YES	0.0145992	0.0178513	0.0702752	0.704839	0.970886	0.0619132	0.123929	0.215465	0.0108643	0.0185406	0.426173	1	ETOH
FBgn0000644	Fcp3C	X:3067409-3068507	-	Known	YES	0.00697808	0.102161	0.266494	0.0757116	0.821479	0.0558427	0.113967	0.158604	0.0236009	0.0383563	0.738579	1	NONE
FBgn0000658	fj	2R:14120266-14123816	+	Known	YES	0.00440637	0.194295	0.417831	0.989341	0.999409	0.106279	0.19116	0.550875	4.37901e-09	1.31822e-08	0.0121085	0.251922	BOTH
FBgn0000659	fkh	3R:24406698-24410986	-	Known	YES	0.028392	0.000916871	0.00581464	0.150156	0.863364	8.14324e-09	5.85908e-08	0.260042	1.3603e-06	3.37562e-06	1	1	BASELINE
FBgn0000662	fl(2)d	2R:9707129-9712058	-	Known	YES	0.000659371	0.615927	0.853992	0.261499	0.90079	0.000656853	0.00236241	0.834649	1.29493e-38	6.53834e-37	0.999999	1	BOTH
FBgn0000667	Actn	X:1917855-1936344	-	Known	YES	0.0427349	4.46648e-05	0.0004089	0.383475	0.929229	2.59381e-05	0.000119447	0.43779	5.21703e-10	1.682e-09	0.67147	1	BOTH
FBgn0000709	fliI	X:21210768-21216115	+	Known	YES	0.000402937	0.694976	0.91354	0.079388	0.827151	1.45142e-08	1.01727e-07	0.0511781	0.294312	0.392088	1	1	NONE
FBgn0000711	flw	X:10279993-10303850	+	Known	YES	0.000207523	0.778414	0.968583	0.312279	0.913815	1.00132e-10	8.8627e-10	0.287887	1.14008e-07	3.07427e-07	1	1	ETOH
FBgn0000715	FMRFa	2R:5793799-5797962	+	Known	YES	0.00575931	0.137695	0.329939	0.284452	0.907834	7.74258e-06	3.83271e-05	0.703197	2.0526e-19	1.45814e-18	0.0617069	0.665089	BOTH
FBgn0000719	fog	X:22226153-22257030	-	Known	YES	0.00216132	0.363595	0.627965	0.646335	0.964347	0.872998	0.91561	0.724785	8.34462e-21	6.89498e-20	0.053118	0.612325	BOTH
FBgn0000721	for	2L:3622074-3656953	-	Known	YES	0.016089	0.0128627	0.0539914	0.00699681	0.712786	0.711834	0.797574	0.554223	2.00117e-16	1.07467e-15	0.999999	1	BOTH
FBgn0000723	FER	3R:5193325-5220268	-	Known	YES	0.00124801	0.490052	0.750282	0.829678	0.983758	0.487902	0.611302	0.878095	6.59703e-37	2.82202e-35	0.0240402	0.387782	BOTH
FBgn0000808	gd	X:11879567-11881797	-	Known	YES	0.00123605	0.492139	0.752038	0.527906	0.948409	0.832248	0.887358	0.434318	4.03841e-13	1.65096e-12	1	1	BOTH
FBgn0000810	fs(1)K10	X:2136171-2140074	+	Known	YES	0.0121251	0.0309809	0.108606	0.630704	0.961973	0.00156894	0.00519761	0.142841	0.00289013	0.00529377	1	1	NONE
FBgn0000826	png	X:1250521-1251634	-	Known	YES	0.00510642	0.162254	0.370041	0.121662	0.853893	0.470173	0.594928	0.228746	1.68715e-05	3.82646e-05	1	1	NONE
FBgn0000927	fs(1)Ya	X:2618319-2620610	+	Known	YES	0.00159755	0.434806	0.700181	0.314492	0.914048	0.573097	0.685765	0.266821	0.02626	0.042405	0.0956229	0.830364	ETOH
FBgn0000928	fs(1)Yb	X:2614501-2618191	+	Known	YES	0.000664572	0.614538	0.853053	0.356496	0.923785	0.629471	0.731637	0.227116	0.00049378	0.000984862	0.838371	1	ETOH
FBgn0000964	tj	2L:19464267-19467758	+	Known	YES	0.0358787	0.000188802	0.00146555	0.929831	0.995405	0.658731	0.755048	0.125632	0.0250887	0.040621	1	1	BASELINE
FBgn0000996	dup	2R:11264124-11268493	-	Known	YES	0.00480599	0.175196	0.390084	0.01109	0.713503	0.0361182	0.0796794	0.252558	7.57499e-05	0.000162931	0.905293	1	BASELINE
FBgn0001075	ft	2L:4198404-4221796	-	Known	YES	0.00782871	0.0833462	0.229013	0.93723	0.995681	4.59743e-13	5.25877e-12	0.890276	2.83199e-43	2.31947e-41	0.296132	1	BOTH
FBgn0001077	ftz	3R:2690046-2691966	+	Known	YES	0.00842724	0.0723616	0.206414	0.468373	0.943323	0.117048	0.206557	0.425289	3.13351e-13	1.29203e-12	1	1	BOTH
FBgn0001078	ftz-f1	3L:18743707-18794409	-	Known	YES	0.0207778	0.00465129	0.0231978	0.925019	0.995075	0.621358	0.725119	0.436467	2.07748e-07	5.49392e-07	0.158557	1	BOTH
FBgn0001079	fu	X:18551788-18555237	+	Known	YES	0.0127713	0.0268003	0.0969152	0.0149961	0.730167	6.31306e-12	6.34937e-11	0.116993	0.378798	0.491179	0.425248	1	ETOH
FBgn0001083	fw	X:11886948-11897947	-	Known	YES	0.000439616	0.682119	0.904964	0.265734	0.902342	1.99066e-05	9.30784e-05	0.635977	3.96135e-21	3.39082e-20	0.999999	1	BOTH
FBgn0001084	fy	2L:8401476-8403280	-	Known	YES	0.0580073	1.79977e-06	2.2593e-05	0.0179015	0.736801	4.59088e-06	2.34553e-05	0.0632592	0.150832	0.213539	1	1	NONE
FBgn0001085	fz	3L:14267443-14361739	+	Known	YES	0.00246344	0.33203	0.593157	0.4808	0.943323	0.390271	0.519104	0.339843	3.69513e-08	1.03411e-07	1	1	BOTH
FBgn0001086	fzy	2L:16310956-16313097	+	Known	YES	0.0149968	0.016352	0.0654547	0.725602	0.973383	0.0206271	0.0500753	0.678417	5.16092e-16	2.66744e-15	0.0147689	0.287334	BOTH
FBgn0001087	g	X:13621237-13630311	-	Known	YES	0.00836986	0.0733442	0.208402	0.886169	0.991787	0.531639	0.64978	0.249446	0.000135346	0.000284395	0.842029	1	ETOH
FBgn0001089	Gal	2L:6003574-6006827	-	Known	YES	0.013761	0.0214939	0.0814448	0.890358	0.991994	3.10862e-15	4.45614e-14	0.798308	3.236e-25	4.33273e-24	0.00927788	0.210082	BOTH
FBgn0001090	bnb	X:18688279-18691720	-	Known	YES	0.00112414	0.512429	0.769005	0.49513	0.945235	0.497846	0.619829	0	1	1	1	1	BASELINE
FBgn0001091	Gapdh1	2R:3679406-3680885	-	Known	YES	0.0570268	2.21276e-06	2.73782e-05	0.120497	0.853083	0.970451	0.981086	0.284531	2.77731e-07	7.27416e-07	1	1	BASELINE
FBgn0001092	Gapdh2	X:15762178-15763694	+	Known	YES	0.00541591	0.150046	0.350725	0.399072	0.931648	0	0	0.495044	1.31056e-14	6.02229e-14	1	1	BOTH
FBgn0001098	Gdh	3R:19761680-19768823	-	Known	YES	0.000923766	0.552656	0.803211	0.186929	0.880184	9.93317e-13	1.09588e-11	0.530924	6.46987e-12	2.40649e-11	0.258451	1	BOTH
FBgn0001099	gdl	3L:15502545-15504147	+	Known	YES	0.00101662	0.533332	0.786772	0.705345	0.970886	0	0	0.65169	1.23176e-20	9.97652e-20	0.701461	1	BOTH
FBgn0001104	Galphai	3L:6965850-6973144	-	Known	YES	0.0419611	5.25509e-05	0.000471456	0.0212436	0.75061	4.17786e-10	3.46832e-09	0.275886	6.99931e-06	1.64075e-05	1	1	ETOH
FBgn0001105	Gbeta13F	X:15754148-15760208	+	Known	YES	0.00339951	0.254373	0.50005	0.579256	0.955595	1.44617e-10	1.25747e-09	0.246182	0.369252	0.480097	0.0195568	0.342933	ETOH
FBgn0001108	DCTN1-p150	3L:13922487-13927756	+	Known	YES	0.0489184	1.21828e-05	0.000127803	0.363184	0.925591	0.000369343	0.00139243	0.756492	1.48208e-31	3.77033e-30	1	1	BOTH
FBgn0001112	Gld	3R:3077785-3091425	-	Known	YES	0.00133938	0.47457	0.736451	0.900896	0.993729	2.38723e-08	1.62828e-07	0.730944	1.08955e-19	7.96236e-19	0.0144355	0.283311	BOTH
FBgn0001114	Glt	2L:8672698-8676804	+	Known	YES	0.00114443	0.508647	0.76586	0.0435505	0.777096	0	0	0.513424	2.18622e-05	4.91419e-05	0.000554103	0.0267723	BOTH
FBgn0001120	gnu	3L:14795480-14796460	-	Known	YES	0.0164002	0.0120155	0.0509961	0.653491	0.965029	0.0117502	0.0308812	0.172386	0.647758	0.786708	0.0857892	0.78603	NONE
FBgn0001122	Galphao	2R:6325490-6353206	+	Known	YES	0.00512393	0.161534	0.369026	0.251045	0.896484	0.010929	0.0289909	0.268571	5.37014e-06	1.27064e-05	1	1	BASELINE
FBgn0001123	Galphas	2R:19830061-19834459	+	Known	YES	0.0013911	0.466155	0.728747	0.252838	0.897297	7.34524e-13	8.21707e-12	0.399749	1.32978e-11	4.83686e-11	0.999999	1	BOTH
FBgn0001124	Got1	2R:12025857-12029433	+	Known	YES	0.0205306	0.00490547	0.0242754	0.322321	0.91625	0	0	0.568669	3.13697e-20	2.43278e-19	0.999999	1	BOTH
FBgn0001125	Got2	2L:1984512-1987758	-	Known	YES	0.0076236	0.0875121	0.237832	0.756028	0.977119	0	0	0.756016	4.54633e-25	5.99866e-24	0.161364	1	BOTH
FBgn0001128	Gpdh1	2L:5943643-5948968	+	Known	YES	0.0150423	0.0161886	0.0649428	0.172936	0.871818	7.77156e-16	1.18325e-14	0.512537	3.43061e-13	1.40952e-12	0.691981	1	BOTH
FBgn0001133	grau	2R:16897269-16899426	-	Known	YES	3.11925e-05	0.913133	1	0.102869	0.841791	0.00149637	0.00498623	0.168712	0.00303533	0.00554792	1	1	NONE
FBgn0001134	Grd	3L:17816433-17832867	+	Known	YES	0.00300392	0.284027	0.536846	0.336934	0.920073	0.00262463	0.0082643	0.341744	1.23514e-08	3.58356e-08	1	1	BASELINE
FBgn0001137	grk	2L:8431086-8433598	-	Known	YES	0.0653603	3.8117e-07	5.5338e-06	0.383469	0.929229	0.49905	0.620892	0.708485	2.89847e-27	4.82073e-26	1	1	BOTH
FBgn0001138	grn	3R:3973090-4007166	-	Known	YES	7.21446e-06	0.95816	1	0.443067	0.938922	3.15e-07	1.87603e-06	0.356753	0.000221653	0.000457305	0.0970354	0.834951	BOTH
FBgn0001139	gro	3R:21867458-21875633	+	Known	YES	4.15177e-05	0.899847	1	0.0436442	0.777096	1.34206e-05	6.42094e-05	0.365474	1.11891e-10	3.79219e-10	1	1	BOTH
FBgn0001142	Gs1	2L:132077-134472	+	Known	YES	0.0888923	2.52989e-09	5.31624e-08	0.230157	0.894606	0.0229336	0.0547834	0.81244	1.48339e-27	2.55972e-26	0.0188402	0.335448	BOTH
FBgn0001145	Gs2	X:11316865-11324230	+	Known	YES	0.00463968	0.182868	0.401162	0.398268	0.931648	0.149142	0.249514	0.361555	1.96542e-11	7.04589e-11	1	1	BASELINE
FBgn0001147	gsb-n	2R:20927906-20939854	-	Known	YES	0.310199	1.14454e-32	3.02626e-30	0.343425	0.921448	0.085921	0.161445	0.602514	8.01139e-13	3.19884e-12	0.042158	0.538543	BOTH
FBgn0001148	gsb	2R:20949487-20952166	+	Known	YES	4.38527e-06	0.967374	1	0.604741	0.95855	0.177125	0.285612	0.113244	0.0453083	0.0705913	1	1	NONE
FBgn0001149	GstD1	3R:8193539-8194990	-	Known	YES	0.284572	1.26727e-29	2.47412e-27	0.13622	0.856572	0.0244953	0.0578829	0.983421	1.6102e-79	7.72436e-76	0.0504505	0.595685	BOTH
FBgn0001150	gt	X:2321146-2323000	-	Known	YES	0.0412017	6.16421e-05	0.000543007	0.0992493	0.839879	0.000333298	0.0012685	0.352848	5.21732e-10	1.682e-09	1	1	BOTH
FBgn0001168	h	3L:8668859-8672353	+	Known	YES	0.00398266	0.217254	0.449389	0.193915	0.882605	0.000555506	0.00203087	0.0937533	0.0424576	0.0664117	1	1	NONE
FBgn0001169	H	3R:16447660-16454637	+	Known	YES	0.000626857	0.624769	0.860644	0.521846	0.947915	2.22045e-16	3.53964e-15	0.0846988	0.0694286	0.104726	1	1	NONE
FBgn0001170	H2.0	2L:6013059-6019402	-	Known	YES	0.000612863	0.628662	0.863395	0.582635	0.955603	0.417487	0.545726	0.0563535	0.645293	0.78397	0.715836	1	NONE
FBgn0001174	halo	2L:1517533-1518148	-	Known	YES	0.00107345	0.522101	0.777203	0.979707	0.999388	0.792191	0.859191	0.0634262	0.145828	0.206978	1	1	NONE
FBgn0001179	hay	3L:10624179-10627069	+	Known	YES	0.284856	1.17396e-29	2.30535e-27	0.704546	0.970886	1.97781e-06	1.05782e-05	0.673232	8.39882e-20	6.21902e-19	0.277872	1	BOTH
FBgn0001180	hb	3R:4516702-4523544	-	Known	YES	0.000758416	0.590576	0.834731	0.0212939	0.75061	8.73973e-06	4.28649e-05	0.124931	0.00904672	0.0156045	1	1	NONE
FBgn0001185	her	2L:16677185-16679691	+	Known	YES	0.00690145	0.10407	0.269838	0.501877	0.946647	8.81022e-06	4.31791e-05	0.263058	0.00381521	0.00690125	0.266999	1	ETOH
FBgn0001186	Hex-A	X:9479708-9483846	+	Known	YES	0.0601625	1.14255e-06	1.49637e-05	0.341116	0.921448	0	0	0.38068	1.56694e-10	5.25599e-10	1	1	BASELINE
FBgn0001187	Hex-C	2R:11106342-11107834	-	Known	YES	0.0240499	0.00230763	0.0128207	0.762785	0.977318	2.22045e-16	3.53964e-15	0.516671	1.69361e-12	6.61063e-12	0.483988	1	BOTH
FBgn0001189	hfw	X:1563603-1567641	+	Known	YES	0.00165349	0.426868	0.692474	0.592923	0.95702	0.0844525	0.159167	0.485841	2.42109e-10	7.99569e-10	0.317492	1	BOTH
FBgn0001197	His2Av	3R:22692651-22694942	+	Known	YES	0.00168885	0.421963	0.687807	0.827436	0.983351	1.13695e-05	5.48832e-05	0.348564	1.52173e-05	3.46579e-05	0.314438	1	BOTH
FBgn0001202	hook	2L:19030844-19033498	-	Known	YES	0.0239348	0.00236498	0.0130812	0.0166229	0.730615	0.456646	0.582642	0.233303	5.05087e-06	1.19754e-05	1	1	NONE
FBgn0001206	Hmr	X:10484953-10489888	-	Known	YES	0.0123587	0.0293966	0.10436	0.745336	0.97646	0.0541554	0.111104	0.109505	0.0433638	0.0677376	1	1	ETOH
FBgn0001208	Hn	3L:7753553-7756266	+	Known	YES	0.00177339	0.41057	0.675731	0.0647571	0.812113	7.14984e-14	8.92985e-13	0.558465	3.9073e-11	1.36917e-10	0.0622275	0.667178	BOTH
FBgn0001215	Hrb98DE	3R:24425556-24431499	+	Known	YES	0.000166377	0.801081	0.983845	0.769455	0.977966	0.147627	0.24751	0.62069	4.42916e-18	2.76247e-17	0.548828	1	BOTH
FBgn0001216	Hsc70-1	3L:13967161-13970861	+	Known	YES	2.65139e-05	0.919888	1	0.40439	0.932596	0.00868942	0.0237558	0.651629	3.05312e-22	2.98468e-21	1	1	BOTH
FBgn0001217	Hsc70-2	3R:8870481-8873110	+	Known	YES	0.000116631	0.832931	1	0.46157	0.943323	0.149695	0.25019	0.707879	1.67126e-22	1.67176e-21	0.318772	1	BOTH
FBgn0001218	Hsc70-3	X:11695729-11701150	-	Known	YES	0.00590344	0.132853	0.321437	0.390478	0.930074	0.228049	0.347797	0.315994	1.72658e-07	4.59164e-07	1	1	BOTH
FBgn0001220	Hsc70-5	2R:10140103-10143697	-	Known	YES	0.0541874	4.02302e-06	4.69562e-05	0.956826	0.997891	5.02153e-09	3.70024e-08	0.430457	9.34238e-14	4.01378e-13	1	1	BOTH
FBgn0001222	Hsf	2R:14017808-14022139	-	Known	YES	0.0170484	0.0104292	0.0453098	0.661769	0.965599	8.16078e-09	5.87044e-08	0.39682	1.33511e-10	4.504e-10	1	1	BOTH
FBgn0001224	Hsp23	3L:9374982-9375865	+	Known	YES	0.00588904	0.133329	0.322186	0.449866	0.940422	0.00944996	0.0255933	0.75496	1.48976e-20	1.19594e-19	0.00518244	0.144061	BOTH
FBgn0001225	Hsp26	3L:9369518-9370527	-	Known	YES	0.00315376	0.272312	0.521783	0.539292	0.949726	1.13203e-05	5.46592e-05	0.752269	9.44443e-22	8.74639e-21	0.0193867	0.341128	BOTH
FBgn0001226	Hsp27	3L:9377163-9378794	+	Known	YES	0.015237	0.0155092	0.0628529	0.0991221	0.839879	9.88272e-09	7.03974e-08	0.502172	6.88629e-14	2.988e-13	0.99865	1	BOTH
FBgn0001227	Hsp67Ba	3L:9370902-9372634	-	Known	YES	0.0572933	2.09195e-06	2.60562e-05	0.125623	0.85495	0.000297563	0.00114378	0.506697	7.01825e-11	2.41369e-10	0.262336	1	BOTH
FBgn0001228	CG4456	3L:9365822-9368064	+	Known	YES	0.00706606	0.100017	0.262306	0.373994	0.928287	8.15315e-05	0.000347049	0.514842	3.66363e-16	1.92046e-15	0.999999	1	BOTH
FBgn0001229	Hsp67Bc	3L:9364611-9365597	-	Known	YES	0.0434813	3.81825e-05	0.000355663	0.181691	0.877545	0.331859	0.460429	0.416703	1.94359e-08	5.55832e-08	0.469709	1	BOTH
FBgn0001230	Hsp68	3R:19880802-19883032	-	Known	YES	0.00181557	0.405054	0.66997	0.979606	0.999388	0.0470556	0.0990563	0.521818	2.93988e-07	7.68078e-07	0.00567712	0.153246	BOTH
FBgn0001233	Hsp83	3L:3192969-3197059	+	Known	YES	0.0130098	0.0254087	0.0929236	0.49209	0.944701	0.010143	0.0271982	0.10019	0.0240044	0.0389687	1	1	NONE
FBgn0001234	lncRNA:Hsromega	3R:17121849-17143558	+	Known	YES	0.0102229	0.047712	0.150906	0.00647561	0.708141	0.0125482	0.0326691	0.773	1.22084e-19	8.88124e-19	0.000313101	0.016428	BOTH
FBgn0001235	hth	3R:6333283-6465290	-	Known	YES	0.00623224	0.122501	0.303631	0.629551	0.961805	1.24312e-06	6.82488e-06	0.23084	0.000496427	0.000989906	0.802862	1	BASELINE
FBgn0001247	Ide	3L:20364772-20368996	-	Known	YES	0.00236949	0.341436	0.603347	0.782608	0.978865	0.929844	0.954756	0.426952	8.96014e-12	3.29697e-11	1	1	BOTH
FBgn0001248	Idh	3L:8349504-8354006	-	Known	YES	0.00056746	0.641683	0.874431	0.0896378	0.833389	1.79912e-12	1.93094e-11	0.59201	7.71621e-18	4.69658e-17	0.87172	1	BOTH
FBgn0001250	if	X:16646222-16677467	-	Known	YES	0.00480074	0.175433	0.390393	0.165901	0.869121	0	0	0.67015	2.12162e-19	1.5059e-18	0.250574	1	BOTH
FBgn0001253	ImpE1	3L:8365505-8384271	+	Known	YES	0.00552464	0.146005	0.344423	0.794348	0.980833	0.823678	0.881215	0.476634	1.28326e-13	5.44983e-13	1	1	BOTH
FBgn0001254	ImpE2	3L:3510974-3512681	-	Known	YES	0.00199256	0.38304	0.64864	0.560207	0.952414	0.581249	0.692417	0.0997773	0.538788	0.669324	0.443403	1	NONE
FBgn0001255	ImpE3	3R:3854175-3855268	-	Known	YES	0.0195658	0.00603988	0.0289618	0.124635	0.85495	0.291688	0.417842	0.427609	1.0621e-09	3.3404e-09	0.692304	1	BOTH
FBgn0001256	ImpL1	3L:13375865-13377099	+	Known	YES	0.00480364	0.175302	0.390206	0.0568736	0.803469	0.400569	0.529111	0.337218	1.02272e-06	2.56386e-06	0.72244	1	BOTH
FBgn0001257	ImpL2	3L:4224006-4236147	-	Known	YES	6.08398e-05	0.878909	1	0.280318	0.907173	4.65673e-05	0.00020545	0.409414	6.54622e-11	2.25736e-10	1	1	BOTH
FBgn0001258	Ldh	3L:6252205-6255794	-	Known	YES	0.0278404	0.00103057	0.00644323	0.290358	0.909259	0.000823371	0.00290446	0.602165	2.25026e-11	8.03871e-11	0.0108708	0.232066	BOTH
FBgn0001259	in	3L:20360298-20363359	+	Known	YES	0.0130289	0.0253007	0.0926606	0.755077	0.977119	0.224995	0.344234	0.504111	6.28958e-14	2.73864e-13	0.985836	1	BOTH
FBgn0001263	inaD	2R:18743211-18746317	-	Known	YES	0.0220954	0.00350505	0.0182913	0.478243	0.943323	0.00017946	0.000719641	0.659152	1.35777e-17	8.07829e-17	0.131991	0.961369	BOTH
FBgn0001269	inv	2R:7361970-7397200	+	Known	YES	0.00359949	0.240838	0.482747	0.257087	0.898166	3.84892e-12	3.99431e-11	0.645935	4.2501e-19	2.92097e-18	0.450104	1	BOTH
FBgn0001276	ix	2R:7246942-7247668	-	Known	YES	0.0442429	3.2537e-05	0.000308207	0.87946	0.990639	0.0462546	0.0976519	0.102984	0.0458765	0.0714136	0.999999	1	NONE
FBgn0001280	janA	3R:25864344-25865255	-	Known	YES	0.00251725	0.326798	0.587122	0.504715	0.946647	0.00838822	0.0230336	0.816767	1.1707e-31	3.00091e-30	0.208575	1	BOTH
FBgn0001281	janB	3R:25863706-25864450	-	Known	YES	0.0128607	0.0262695	0.0953817	0.602249	0.958428	7.14984e-14	8.92985e-13	0.639943	1.05267e-19	7.69619e-19	0.655144	1	BOTH
FBgn0001285	Jon44E	2R:4578953-4580349	+	Known	YES	0.072172	8.99995e-08	1.47424e-06	0.111747	0.848499	0.872458	0.91526	0.835915	1.82174e-34	6.11128e-33	0.261506	1	BOTH
FBgn0001291	Jra	2R:5983985-5986061	+	Known	YES	0.0673175	2.51919e-07	3.79348e-06	0.118158	0.851603	1.39657e-08	9.8087e-08	0.544035	1.72394e-09	5.33696e-09	0.0252025	0.399575	BOTH
FBgn0001296	kar	3R:8507908-8515089	-	Known	YES	0.00584429	0.134817	0.324667	0.0780431	0.824255	1.44975e-11	1.40061e-10	0.609645	4.71528e-15	2.24818e-14	0.163856	1	BOTH
FBgn0001297	kay	3R:25591717-25619835	+	Known	YES	0.0390476	9.69408e-05	0.000809367	0.850257	0.986346	5.74984e-07	3.2969e-06	0.509198	4.33793e-13	1.76996e-12	0.704106	1	BOTH
FBgn0001301	kel	2L:18129884-18138083	-	Known	YES	0.0111207	0.038875	0.128982	0.608705	0.959067	0.18509	0.295841	0.51559	1.30068e-10	4.3914e-10	0.174593	1	BOTH
FBgn0001308	Khc	2R:12154465-12159476	-	Known	YES	8.77766e-05	0.8548	1	0.0946424	0.833784	2.0976e-08	1.44187e-07	0.26006	1.91544e-06	4.69766e-06	1	1	ETOH
FBgn0001311	kkv	3R:1203815-1218588	-	Known	YES	0.00604052	0.128424	0.313909	0.272495	0.904477	0.322345	0.45057	0.449293	6.76418e-07	1.71829e-06	0.0707478	0.713641	BOTH
FBgn0001313	kl-2	YHet:81209-148249	+	Known	YES	0	1	1	0.439	0.938247	0.000158163	0.000640822	0.642012	2.81851e-21	2.45195e-20	1	1	BOTH
FBgn0001314	kl-3	YHet:34290-65839	+	Known	YES	0	1	1	0.893068	0.9921	0.574981	0.687315	0.673592	2.43507e-20	1.91588e-19	0.356476	1	BOTH
FBgn0001315	kl-5	YHet:311-33413	+	Known	YES	-2.22045e-16	1	1	0.297124	0.910367	0.00647314	0.0183435	0.688238	1.1569e-20	9.41334e-20	0.256957	1	BOTH
FBgn0001316	klar	3L:434083-540614	-	Known	YES	0.0167247	0.0111929	0.0480696	0.10059	0.840948	2.75628e-11	2.57325e-10	0.530323	9.16858e-11	3.12665e-10	0.124476	0.93713	BOTH
FBgn0001319	kn	2R:10660155-10694566	-	Known	YES	0.0310573	0.000521739	0.00357187	0.81353	0.982269	0.00739128	0.0206422	0.430736	2.42421e-08	6.88008e-08	0.338989	1	BOTH
FBgn0001320	kni	3L:20685430-20688478	-	Known	YES	0.00727421	0.0951355	0.252965	0.206046	0.886194	0.69517	0.784189	0.0606262	0.163847	0.230373	1	1	BASELINE
FBgn0001321	knk	3R:5948087-5951386	-	Known	YES	0.0410831	6.31976e-05	0.000554527	0.273359	0.904681	2.22777e-05	0.000103603	0.479198	5.28441e-12	1.98092e-11	0.760239	1	BOTH
FBgn0001323	knrl	3L:20590241-20613759	-	Known	YES	3.09425e-05	0.91348	1	0.9746	0.999179	0.0178441	0.0442611	0.346273	9.81329e-05	0.000208682	0.177201	1	BOTH
FBgn0001324	kto	3L:19829714-19838044	+	Known	YES	0.0081783	0.0767292	0.215162	0.773002	0.978326	0	0	0.186408	0.000263482	0.000539759	1	1	ETOH
FBgn0001325	Kr	2R:21114134-21118917	+	Known	YES	0.00175574	0.412911	0.678321	0.0887835	0.832897	0.0194235	0.0475939	0.2048	0.000294719	0.000600927	1	1	NONE
FBgn0001330	kz	X:2131891-2136068	-	Known	YES	0.0669823	2.70444e-07	4.04521e-06	0.0295054	0.771133	0.000161067	0.00065167	0.0853175	1	1	0.278335	1	NONE
FBgn0001332	L	2R:10368692-10384817	+	Known	YES	0.0149907	0.0163738	0.0655032	0.219943	0.891504	0	0	0.563431	3.44102e-17	1.97656e-16	1	1	BOTH
FBgn0001341	Mybbp1A	X:523806-527666	+	Known	YES	0.0414572	5.84201e-05	0.000516793	0.766347	0.977871	0.835128	0.889553	0.436524	1.46871e-12	5.75687e-12	1	1	BOTH
FBgn0001404	egh	X:2482536-2493144	+	Known	YES	0.00809915	0.0781764	0.218182	0.0696805	0.81912	3.97546e-09	2.96089e-08	0.440642	4.67117e-08	1.2957e-07	0.226712	1	BOTH
FBgn0001491	l(1)10Bb	X:11218327-11219341	-	Known	YES	0.0034659	0.249779	0.494638	0.995883	0.999665	0	0	0.22941	1.11818e-05	2.57216e-05	1	1	BASELINE
FBgn0001565	Hlc	X:21256545-21258973	-	Known	YES	0.0579531	1.82042e-06	2.28351e-05	0.107489	0.845392	0.202103	0.316909	0.596366	2.91482e-12	1.11582e-11	0.0340387	0.473882	BOTH
FBgn0001612	Grip91	X:13630603-13638716	-	Known	YES	0.00604371	0.128323	0.313799	0.368088	0.926629	6.3489e-06	3.18175e-05	0.168591	0.00108554	0.00208347	1	1	NONE
FBgn0001624	dlg1	X:11263698-11303809	+	Known	YES	0.00899911	0.0633012	0.186887	0.0706629	0.81912	1.9762e-14	2.62129e-13	0.604348	6.10991e-13	2.46451e-12	0.0429707	0.544512	BOTH
FBgn0001941	ifc	2L:5986348-5988854	+	Known	YES	0.000404346	0.69447	0.913317	0.847141	0.986128	0	0	0.466364	1.2663e-06	3.15143e-06	0.0297006	0.438009	BOTH
FBgn0001942	eIF4A	2L:5981764-5985909	+	Known	YES	0.000677525	0.611109	0.850424	0.56307	0.95288	9.58033e-06	4.66876e-05	0.510852	1.08751e-15	5.47179e-15	1	1	BOTH
FBgn0001961	Arpc1	2L:13827941-13829741	-	Known	YES	0.0150891	0.0160226	0.0644589	0.371292	0.927728	9.81926e-12	9.66155e-11	0.561407	6.14794e-18	3.78041e-17	1	1	BOTH
FBgn0001965	Sos	2L:13813816-13819826	+	Known	YES	9.73567e-07	0.984624	1	0.589433	0.956711	0	0	0.199467	0.00067759	0.00133178	1	1	ETOH
FBgn0001967	NimC3	2L:14019357-14020208	-	Known	YES	0.00042756	0.686274	0.907956	0.71988	0.97329	0.467838	0.592845	1.60132e-14	1	1	1	1	NONE
FBgn0001970	Pgant35A	2L:14359252-14361411	+	Known	YES	0.099476	2.57437e-10	6.28709e-09	0.10387	0.842449	4.42673e-10	3.66677e-09	0.351181	6.8872e-10	2.2005e-09	1	1	ETOH
FBgn0001974	l(2)35Bd	2L:15009939-15011764	+	Known	YES	0.12759	5.34459e-13	1.91743e-11	0.400614	0.931737	0.0317432	0.0717279	0.402512	3.38958e-11	1.1931e-10	1	1	BOTH
FBgn0001977	CIAPIN1	2L:15036293-15038861	-	Known	YES	0.00727394	0.0951416	0.252965	0.112155	0.848499	0.411827	0.540432	0.430673	4.24051e-11	1.48222e-10	1	1	BOTH
FBgn0001978	stc	2L:15113480-15118069	+	Known	YES	0.0245929	0.00205524	0.0116344	0.505566	0.946647	0	0	0.74788	6.08829e-30	1.32412e-28	1	1	BOTH
FBgn0001981	esg	2L:15333866-15336138	+	Known	YES	0.00683585	0.105735	0.273124	0.00495556	0.70164	5.18839e-06	2.63238e-05	0.676491	4.68573e-15	2.23504e-14	0.00647526	0.165353	BOTH
FBgn0001983	wor	2L:15423297-15425580	-	Known	YES	0.0101025	0.0490481	0.154202	0.908923	0.994505	0.00239068	0.00761117	0.124915	0.0325254	0.0518836	0.971887	1	ETOH
FBgn0001986	Mtr4	2L:15752263-15755900	+	Known	YES	0.0807436	1.4502e-08	2.69794e-07	0.378376	0.928536	0.867665	0.911942	0.545391	2.50017e-16	1.32884e-15	1	1	BOTH
FBgn0001987	Gli	2L:15756002-15762758	-	Known	YES	0.038081	0.000118789	0.000971252	0.406544	0.932987	0.0271739	0.0630856	0.679732	4.57284e-14	2.012e-13	0.00171055	0.0646121	BOTH
FBgn0001989	ND-B17	2L:15749319-15751078	-	Known	YES	5.68302e-06	0.962862	1	0.394944	0.931301	7.39936e-05	0.00031706	0.308863	2.35335e-08	6.68293e-08	1	1	BASELINE
FBgn0001990	wek	2L:15766133-15768349	-	Known	YES	0.00214877	0.364993	0.629441	0.142302	0.858354	0.906946	0.939405	0.436263	6.00026e-14	2.61708e-13	1	1	BOTH
FBgn0001991	Ca-alpha1D	2L:16165831-16190540	+	Known	YES	0.0273253	0.00114955	0.00707771	0.120755	0.853515	6.79456e-14	8.50511e-13	0.656879	5.58626e-21	4.70732e-20	0.704451	1	BOTH
FBgn0001992	Cyp303a1	2L:16294183-16296969	+	Known	YES	0.0359114	0.000187505	0.00145775	0.387999	0.929861	0.113218	0.201343	0.416629	8.16046e-10	2.59153e-09	0.83995	1	BOTH
FBgn0001994	crp	2L:16263556-16287730	-	Known	YES	0.00227513	0.351245	0.614057	0.678094	0.968072	0.00195579	0.00635437	0.308282	1.57815e-05	3.58844e-05	0.619408	1	BOTH
FBgn0001995	mRpL4	2L:16328059-16329132	-	Known	YES	0.0413264	6.00482e-05	0.000530357	0.266421	0.902466	0.914685	0.94474	0.466623	5.05519e-13	2.05214e-12	0.999999	1	BOTH
FBgn0002021	l(2)37Bb	2L:19049843-19051612	-	Known	YES	0.233648	7.05581e-24	8.28441e-22	0.724625	0.973383	0.0104223	0.0278159	0.479901	8.50535e-15	3.97453e-14	1	1	BOTH
FBgn0002022	Catsup	2L:19041862-19043614	+	Known	YES	0.00194257	0.389081	0.654544	0.0621325	0.809468	0.000216596	0.00085482	0.388474	1.72805e-11	6.22418e-11	1	1	BOTH
FBgn0002023	Lim3	2L:19079256-19108427	-	Known	YES	0.0235077	0.00259081	0.0141324	0.543743	0.949804	0.0614785	0.123177	0.497075	3.95109e-10	1.28551e-09	0.211789	1	BOTH
FBgn0002031	l(2)37Cc	2L:19121345-19123869	-	Known	YES	0.0239313	0.00236674	0.0130888	0.345674	0.921448	1.31892e-09	1.03479e-08	0.347541	2.7571e-07	7.22291e-07	0.79834	1	BOTH
FBgn0002036	CG10561	2L:19114401-19116570	+	Known	YES	0.0261477	0.00147618	0.00877811	0.837372	0.984659	3.79669e-10	3.16441e-09	0.553655	6.26617e-18	3.85028e-17	0.999999	1	BOTH
FBgn0002044	swm	2L:19493251-19497978	+	Known	YES	9.11429e-05	0.852073	1	0.634744	0.963045	0.000223122	0.000878463	0.0820044	0.0624521	0.0950008	1	1	NONE
FBgn0002069	AspRS	2R:8764509-8770673	+	Known	YES	0.0326211	0.000375062	0.00268027	0.0519416	0.794027	0.00850512	0.0233127	0.362657	2.00994e-09	6.19208e-09	1	1	BOTH
FBgn0002121	l(2)gl	2L:9839-21376	-	Known	YES	0.00425369	0.202223	0.428622	0.0418024	0.773688	5.86198e-14	7.37348e-13	0.49956	2.00143e-08	5.71594e-08	0.0524219	0.607637	BOTH
FBgn0002174	l(2)tid	2R:19594436-19596549	+	Known	YES	0.00663448	0.111031	0.282991	0.491821	0.944701	0	0	0.597818	1.96549e-19	1.39892e-18	1	1	BOTH
FBgn0002183	dre4	3L:1871574-1876312	-	Known	YES	0.0178848	0.00869309	0.0392094	0.204961	0.886007	0.0318943	0.0720126	0.494526	2.31544e-09	7.10133e-09	0.133988	0.967389	BOTH
FBgn0002283	l(3)73Ah	3L:16581575-16583232	+	Known	YES	0.0350623	0.000224213	0.00170225	0.163557	0.868766	4.7504e-08	3.12171e-07	0.270929	3.87411e-07	1.00403e-06	1	1	NONE
FBgn0002284	Prosbeta6	3L:16602500-16603518	-	Known	YES	0.116433	6.32593e-12	1.94528e-10	0.207397	0.886406	2.07316e-07	1.26248e-06	0.336179	6.07501e-09	1.80626e-08	1	1	ETOH
FBgn0002306	sas	3R:2988600-3009424	+	Known	YES	0.00434532	0.19742	0.421828	0.995765	0.999665	1.21866e-05	5.8606e-05	0.662971	1.21039e-20	9.81284e-20	0.543818	1	BOTH
FBgn0002354	l(3)87Df	3R:8856635-8857320	+	Known	YES	0.00689095	0.104335	0.27029	0.00488375	0.70164	0.00161428	0.00533202	0.251687	0.000285461	0.000582794	0.702355	1	ETOH
FBgn0002413	dco	3R:26879807-26886932	-	Known	YES	0.076756	3.39499e-08	5.95816e-07	0.368308	0.926691	0.000640165	0.00230958	0.343087	1.32513e-08	3.83702e-08	1	1	BOTH
FBgn0002431	hyd	3R:5540345-5551337	-	Known	YES	0.00248226	0.330188	0.590975	0.236054	0.894606	0.0100715	0.0270237	0.404172	1.4109e-07	3.77784e-07	0.373257	1	BOTH
FBgn0002440	l(3)mbn	3L:6117034-6121907	-	Known	RARE	0.00525337	0.156323	0.360554	0.00385974	0.70164	0.0881424	0.16487	0.0413874	0.480235	0.605364	0.966062	1	NONE
FBgn0002441	l(3)mbt	3R:23092048-23098995	-	Known	YES	0.00985371	0.0519356	0.160915	0.174605	0.872684	1.33227e-15	1.98345e-14	0.362834	2.05687e-09	6.32679e-09	1	1	ETOH
FBgn0002466	sti	3L:12501098-12507915	-	Known	YES	4.47363e-05	0.896059	1	0.00275733	0.652613	0.00107126	0.00369016	0.626867	7.53353e-20	5.60673e-19	0.878139	1	BOTH
FBgn0002521	pho	4:1193095-1202254	-	Known	YES	0.00324941	0.26515	0.512872	0.131524	0.855742	0	0	0.0358678	0.40374	0.519926	1	1	NONE
FBgn0002522	lab	3R:2487149-2504312	-	Known	YES	9.96183e-06	0.950843	1	0.697864	0.970217	0.0038685	0.0116564	0.465848	2.7883e-12	1.06921e-11	0.988676	1	BOTH
FBgn0002524	lace	2L:15499127-15505018	+	Known	YES	0.0220224	0.00356031	0.0185271	0.215068	0.889667	2.11141e-08	1.45076e-07	0.350997	1.49411e-07	3.99397e-07	0.846448	1	BOTH
FBgn0002525	Lam	2L:5542480-5546642	+	Known	YES	0.0320959	0.00041901	0.00294852	0.0722453	0.81912	0.264384	0.388526	0.599569	1.6081e-19	1.1565e-18	1	1	BOTH
FBgn0002526	LanA	3L:6196931-6211122	-	Known	YES	6.33639e-06	0.960787	1	0.104815	0.842449	0	0	0.841944	5.5216e-34	1.77261e-32	0.133659	0.966469	BOTH
FBgn0002531	Lcp1	2R:4317620-4318748	-	Known	YES	0.0112061	0.0381285	0.127057	0.0644491	0.810654	0.190682	0.302632	0.53609	4.49688e-13	1.83326e-12	0.419633	1	BOTH
FBgn0002534	Lcp3	2R:4322815-4323600	+	Known	YES	0.0183749	0.0078156	0.0358046	0.0884035	0.832897	0.0614096	0.123089	0.0617621	0.181197	0.252703	1	1	NONE
FBgn0002535	Lcp4	2R:4325152-4326000	+	Known	YES	0.0049235	0.169998	0.382008	0.290647	0.909259	0.851986	0.901242	0.294717	0.00120033	0.00229265	0.218261	1	BOTH
FBgn0002542	lds	3R:3746153-3750213	+	Known	YES	0.0280337	0.000989204	0.0062112	0.253177	0.897297	1.55507e-05	7.37386e-05	0.67651	2.60495e-21	2.27206e-20	0.497413	1	BOTH
FBgn0002543	robo2	2L:1380086-1420453	-	Known	YES	0.0249437	0.00190721	0.0109067	0.0257106	0.761498	0	0	0.648715	1.82398e-17	1.07323e-16	0.181037	1	BOTH
FBgn0002552	lin	2R:4802029-4805739	+	Known	YES	0.00258084	0.320756	0.58052	0.349918	0.922337	3.99223e-11	3.68004e-10	0.233384	1.56781e-05	3.5659e-05	1	1	ETOH
FBgn0002561	l(1)sc	X:303754-304850	+	Known	YES	0.00220999	0.358243	0.621984	0.435857	0.937679	0.407343	0.536014	0.0834474	0.0998891	0.146571	1	1	NONE
FBgn0002562	Lsp1alpha	X:12384324-12387015	+	Known	YES	0.0210272	0.00440835	0.0221772	0.401579	0.932095	0.698596	0.786871	0.527445	1.56952e-07	4.18922e-07	0.00607173	0.158916	BOTH
FBgn0002563	Lsp1beta	2L:898500-901316	+	Known	YES	0.0255324	0.00168255	0.00980395	0.246543	0.894996	0.0129582	0.0335932	0.824486	4.09125e-30	8.97194e-29	0.0460952	0.568236	BOTH
FBgn0002564	Lsp1gamma	3L:66430-68995	+	Known	YES	0.000574214	0.639707	0.872688	0.812115	0.982269	0.513742	0.634234	0.77795	1.12757e-18	7.42137e-18	4.70199e-05	0.00337378	BOTH
FBgn0002565	Lsp2	3L:12122493-12124969	+	Known	YES	0.0174384	0.00957956	0.0423711	0.698228	0.970217	0.12982	0.223928	0.765922	1.51646e-19	1.0937e-18	0.000603649	0.0283504	BOTH
FBgn0002566	lt	2L:22817527-22835867	+	Known	YES	0.000693266	0.606996	0.847346	0.691457	0.969445	0	0	0.483806	1.81267e-16	9.77037e-16	1	1	BOTH
FBgn0002567	Rab32	2R:5065369-5073847	-	Known	YES	0.0629449	6.35072e-07	8.7688e-06	0.95681	0.997891	0	0	0.656743	2.59229e-18	1.6496e-17	0.221327	1	BOTH
FBgn0002569	Mal-A2	2R:4341132-4343287	+	Known	YES	0.0366386	0.000160899	0.00127339	0.894651	0.992605	0	0	0.737373	1.88973e-21	1.68009e-20	0.0410287	0.529088	BOTH
FBgn0002570	Mal-A1	2R:4337169-4339409	-	Known	YES	0.0145675	0.0179768	0.0706366	0.382502	0.928629	0	0	0.682163	4.44197e-19	3.04909e-18	0.131686	0.961369	BOTH
FBgn0002571	Mal-A3	2R:4343414-4345397	-	Known	YES	0.0619347	7.86081e-07	1.06696e-05	0.566865	0.95288	0	0	0.734485	8.5995e-19	5.73186e-18	0.00466882	0.134114	BOTH
FBgn0002573	sens	3L:13389328-13394225	-	Known	YES	0.0227286	0.00306051	0.0162923	0.00608743	0.703237	0.0105335	0.028077	0.490934	1.48368e-09	4.61699e-09	0.170583	1	BOTH
FBgn0002576	lz	X:9178682-9197669	+	Known	YES	0.000657093	0.616538	0.854557	0.442575	0.938752	0.0372062	0.0815278	0.169674	0.00152652	0.00288127	1	1	NONE
FBgn0002577	m	X:11648306-11663541	+	Known	YES	0.000121491	0.829538	1	0.653144	0.965029	0.932554	0.956632	0.445665	3.57037e-12	1.35592e-11	1	1	BOTH
FBgn0002578	Kaz-m1	3R:21840443-21842209	+	Known	YES	0.00893347	0.0642769	0.189036	0.236239	0.894606	0.0361753	0.0797738	0.657741	5.73836e-16	2.95091e-15	0.0436669	0.548778	BOTH
FBgn0002579	RpL36	X:522371-523516	-	Known	YES	0.00349576	0.247746	0.491917	0.108242	0.845392	0.74407	0.822717	0.276726	3.52104e-07	9.1493e-07	0.999999	1	ETOH
FBgn0002590	RpS5a	X:17037621-17042297	-	Known	YES	0.000692686	0.607146	0.847521	0.274048	0.904681	0.0349579	0.0775887	0.157753	0.000518268	0.00103077	0.999999	1	NONE
FBgn0002592	E(spl)m2-BFM	3R:21842236-21843192	-	Known	YES	0.00198086	0.384442	0.649832	0.544679	0.950015	0.00162359	0.00535906	0.157118	0.0621255	0.094534	0.547679	1	NONE
FBgn0002593	RpLP1	2L:419952-420864	+	Known	YES	0.00293881	0.289315	0.543446	0.0977236	0.838938	0.130719	0.225097	0.134047	0.00290917	0.00532602	1	1	NONE
FBgn0002607	RpL19	2R:20855400-20857070	-	Known	YES	0.0488203	1.24366e-05	0.000130222	0.0639787	0.810654	1.37872e-08	9.68945e-08	0.227987	2.75533e-06	6.67803e-06	1	1	ETOH
FBgn0002609	E(spl)m3-HLH	3R:21847545-21848849	+	Known	YES	0.000677463	0.611125	0.850424	0.661481	0.965599	0.0195781	0.0479124	0.313847	0.000506652	0.0010088	0.200534	1	BASELINE
FBgn0002622	RpS3	3R:19184534-19185929	+	Known	YES	0.0442701	3.23515e-05	0.000306969	0.341855	0.921448	4.66933e-05	0.000205909	0.304845	3.8725e-08	1.08131e-07	1	1	ETOH
FBgn0002626	RpL32	3R:25870951-25871883	-	Known	YES	0.0304911	0.000588052	0.00395743	0.154615	0.865597	3.23863e-11	3.0085e-10	0.15078	0.00102058	0.0019652	1	1	ETOH
FBgn0002629	E(spl)m4-BFM	3R:21849543-21850301	-	Known	YES	0.000196531	0.784213	0.972843	0.631504	0.96236	0.60304	0.710459	0	1	1	1	1	NONE
FBgn0002631	E(spl)m5-HLH	3R:21854576-21855457	-	Known	YES	3.1822e-06	0.972205	1	0.87309	0.989829	0.916186	0.945737	0.0127432	0.763561	0.907078	1	1	NONE
FBgn0002632	E(spl)m6-BFM	3R:21858633-21859769	+	Known	YES	0.000906865	0.556314	0.806329	0.983375	0.999388	0.059744	0.120392	0.228654	0.803085	0.945712	0.01137	0.240326	ETOH
FBgn0002633	E(spl)m7-HLH	3R:21862760-21863741	+	Known	YES	0.00140662	0.463677	0.726814	0.101078	0.840948	0.929697	0.954693	0.136098	0.00812642	0.0141041	0.999999	1	NONE
FBgn0002638	Rcc1	3L:5923362-5925873	-	Known	YES	0.0497435	1.02432e-05	0.0001093	0.261526	0.90079	0.744077	0.822717	0.621043	1.03662e-20	8.48606e-20	1	1	BOTH
FBgn0002641	mal	X:20300702-20304237	+	Known	YES	0.00336408	0.256868	0.50301	0.356311	0.923785	0	0	0.274988	8.12565e-07	2.0508e-06	1	1	ETOH
FBgn0002643	mam	2R:9878708-9947861	+	Known	YES	0.0107538	0.0422592	0.137708	0.404579	0.932596	0	0	0.325096	1.60441e-08	4.61623e-08	1	1	ETOH
FBgn0002645	Map205	3R:27881001-27894163	-	Known	YES	0.00583937	0.134982	0.324982	0.24314	0.894987	0.0026845	0.00843148	0.962515	0.000621013	0.0012256	2.22033e-84	3.72793e-80	BOTH
FBgn0002673	twe	2L:16259414-16261877	-	Known	YES	0.0443676	3.16961e-05	0.000301346	0.396541	0.931477	9.7248e-08	6.17283e-07	0.72867	4.00874e-26	5.95372e-25	0.703134	1	BOTH
FBgn0002707	mei-9	X:4208263-4212834	-	Known	YES	0.00886433	0.065322	0.19154	0.906102	0.994217	0.540966	0.658186	0.258389	2.48364e-06	6.04002e-06	0.999999	1	BASELINE
FBgn0002709	mei-218	X:17030018-17037029	-	Known	YES	0.00253839	0.324773	0.584829	0.169016	0.869967	0.000164741	0.000665065	0.0750244	0.0872079	0.129223	1	1	NONE
FBgn0002715	mei-S332	2R:18009606-18012071	+	Known	YES	0.0453051	2.60296e-05	0.000254018	0.343516	0.921448	4.89458e-05	0.000215192	0.670049	1.24673e-17	7.45331e-17	0.0853723	0.784136	BOTH
FBgn0002716	mei-W68	2R:15343675-15347028	+	Known	YES	0.0198264	0.00570948	0.027618	0.478474	0.943323	0.000298912	0.00114805	0.102488	0.0909461	0.134323	0.926688	1	BASELINE
FBgn0002719	Men	3R:8538825-8548164	-	Known	YES	0.0163267	0.0122104	0.0516663	0.981836	0.999388	1.68771e-05	7.95894e-05	0.641474	7.10342e-15	3.34033e-14	0.0394118	0.515562	BOTH
FBgn0002723	Met	X:11510157-11515313	+	Known	YES	0.0018752	0.397439	0.662695	0.0830872	0.830382	0.0516955	0.106946	0.277647	0.000378545	0.000763043	0.446812	1	ETOH
FBgn0002732	E(spl)malpha-BFM	3R:21836615-21837290	+	Known	YES	0.0150088	0.0163088	0.06534	0.49577	0.945235	0.0747232	0.144488	0.116199	0.498663	0.625517	0.358736	1	NONE
FBgn0002733	E(spl)mbeta-HLH	3R:21830768-21831745	-	Known	YES	0.0112622	0.0376466	0.125901	0.161495	0.867564	5.18294e-07	2.98818e-06	0.414352	6.17966e-08	1.69953e-07	0.37486	1	BOTH
FBgn0002734	E(spl)mdelta-HLH	3R:21823343-21824355	+	Known	YES	0.00142996	0.45999	0.72347	0.484715	0.943682	0.412904	0.541473	0.111641	0.225299	0.307906	0.603908	1	NONE
FBgn0002735	E(spl)mgamma-HLH	3R:21825573-21826483	+	Known	YES	0.0118108	0.0332544	0.114582	0.0641306	0.810654	0.237912	0.358942	0.0645973	0.719469	0.861833	0.603225	1	NONE
FBgn0002736	mago	2R:17016082-17017242	+	Known	YES	0.00390904	0.221562	0.455579	0.333867	0.919037	4.05087e-12	4.18191e-11	0.267036	2.93402e-06	7.09421e-06	0.999999	1	ETOH
FBgn0002772	Mlc1	3R:23482800-23485899	-	Known	YES	0.000252555	0.75624	0.954689	0.23036	0.894606	0.000118294	0.000490415	0.346084	0.000104712	0.000222125	0.173704	1	BOTH
[truncated: 33,154 more rows]
