# Supplementary material for: Modulation of the Drosophila transcriptome by developmental exposure to alcohol
Source: BMC Genomics. 2022 May 6;23:347. doi: 10.1186/s12864-022-08559-9 (PMC9074282; doi:10.1186/s12864-022-08559-9)
Supplement: Supplementary file 4 — Additional file 4. Genes with significant LxT interactions in transcript abundances. (A) Results of female-only mixed-effect models for all expressed gene profiles, including alignment bias estimates. (B) Results of male-only mixed-effect models for all expressed gene profiles, including alignment bias estimates. (C) Genes with significant LxT interactions common to females and males and that are female- specific or male-specific. (D) Enrichment analyses for genes with significant LxT interactions in transcript abundances in females. (E) Enrichment analyses for genes with significant LxT interactions in transcript abundances in males. (F) Enrichment analyses for genes with significant LxT interactions in transcript abundances in both sexes. (G) Enrichment analyses for genes with significant LxT interactions in transcript abundances in females only. (H) Enrichment analyses for genes with significant LxT interactions in transcript abundances in males only. (I) Human orthologs for genes with significant LxT interactions in transcript abundances. [file 12864_2022_8559_MOESM4_ESM.xlsx]

## Sheet: A. Female LxT
FlyBase Gene ID	Gene Symbol	Gene Locus	Gene Strand	TYPE	Expressed in DGRP	% Variance Explained by Alignment Bias	Alignment Bias Effect P-value	Alignment Bias Effect FDR	Wolbachia Effect P-value	Wolbachia Effect FDR	Treatment Effect P-value	Treatment Effect FDR	H2	Line Effect P-value	Line Effect FDR	Treatment by Line Effect P-value	Treatment by Line Effect FDR	Significant Treatment
FBgn0000042	Act5C	X:5794894-5799432	+	Known	YES	0.00256997	0.321778	0.697952	0.261768	0.827972	1.20792e-13	1.00909e-12	0.38425	0.478947	0.727446	1.93258e-05	0.00166994	BOTH
FBgn0000061	al	2L:378112-387439	+	Known	YES	0.000193839	0.785661	1	0.069209	0.688979	0.689181	0.774419	0.340001	0.510062	0.764284	0.000214909	0.0123802	ETOH
FBgn0000078	Amy-d	2R:13012269-13013874	+	Known	YES	0.00274143	0.306132	0.683243	0.083915	0.705036	0	0	0.90867	5.72152e-32	5.43415e-30	2.79239e-08	5.74359e-06	BOTH
FBgn0000079	Amy-p	2R:13006141-13007808	-	Known	YES	0.0848437	6.03201e-09	3.48081e-07	0.594179	0.940567	0	0	0.902346	3.42392e-35	4.28335e-33	3.27077e-05	0.00255021	BOTH
FBgn0000099	ap	2R:1593707-1615030	-	Known	YES	9.12721e-05	0.851969	1	0.285111	0.837832	5.76206e-14	4.96328e-13	0.696335	2.12084e-12	2.68424e-11	4.07426e-05	0.00309045	BOTH
FBgn0000120	Arr1	2L:18078269-18081307	+	Known	YES	0.00403191	0.214427	0.575911	0.104824	0.722409	4.06204e-11	2.74206e-10	0.543923	1.84503e-06	1.0839e-05	0.000519958	0.0242794	BOTH
FBgn0000121	Arr2	3L:8640361-8642036	-	Known	YES	0.0113655	0.0367759	0.202328	0.263121	0.828843	2.30562e-07	1.18739e-06	0.513145	9.93405e-05	0.000425145	0.000168515	0.0100155	BOTH
FBgn0000157	Dll	2R:20702345-20723190	+	Known	YES	0.0026257	0.31658	0.693044	0.155786	0.762433	1.36572e-11	9.55404e-11	0.342438	0.183777	0.337066	0.00102634	0.0399652	BOTH
FBgn0000277	CecA2	3R:26037878-26038290	+	Known	YES	0.00577354	0.137208	0.454159	0.270724	0.830468	0.000351052	0.00128196	0.470498	0.000356059	0.00134145	0.00074081	0.0315438	BOTH
FBgn0000279	CecC	3R:26042206-26042660	+	Known	YES	2.69126e-05	0.91929	1	0.579116	0.937614	0.00401077	0.0118228	0.504811	7.36719e-05	0.000322918	0.000362716	0.0184998	BOTH
FBgn0000346	comt	X:13153054-13156521	+	Known	YES	0.0067121	0.108956	0.398403	0.625945	0.945135	0.000476776	0.00170231	0.690401	2.89138e-14	4.53836e-13	0.000953533	0.0379983	BOTH
FBgn0000370	crc	2L:21310866-21319527	+	Known	YES	6.45644e-06	0.960417	1	0.946493	0.992718	0.00660988	0.0184031	0.693168	0.0017862	0.00571486	5.1912e-15	3.41265e-12	BOTH
FBgn0000427	dec-1	X:7761194-7767255	-	Known	YES	0.00418746	0.20578	0.563935	0.764708	0.968455	0.368179	0.489014	0.408749	0.0793524	0.165585	9.79091e-05	0.00638638	BOTH
FBgn0000449	dib	3L:4062292-4064551	+	Known	YES	0.00264097	0.315175	0.691677	0.898298	0.987866	0.236652	0.351227	0.58196	1.5462e-05	7.72109e-05	5.47785e-06	0.000559926	BOTH
FBgn0000473	Cyp6a2	2R:2667254-2668996	-	Known	YES	0.00975116	0.0531776	0.256778	0.125928	0.741237	9.0838e-10	5.58731e-09	0.950645	3.59777e-51	2.6805e-48	0.000317397	0.0168628	BOTH
FBgn0000527	e	3R:17055561-17062899	-	Known	YES	0.0158078	0.0136809	0.102682	0.348314	0.865389	1.08403e-08	6.15491e-08	0.537859	5.46633e-06	2.95406e-05	0.000346812	0.0179438	BOTH
FBgn0000557	eEF1alpha2	3R:27564190-27569028	+	Known	YES	0.0425783	4.61589e-05	0.00102352	0.676381	0.953166	0.0359263	0.0780923	0.55438	5.37856e-07	3.41917e-06	0.000634098	0.0280467	BOTH
FBgn0001114	Glt	2L:8672698-8676804	+	Known	YES	0.000215543	0.774287	1	0.060626	0.685423	0.000188679	0.000717386	0.574728	3.33345e-08	2.53771e-07	0.00107869	0.0414935	BOTH
FBgn0001218	Hsc70-3	X:11695729-11701150	-	Known	YES	0.00407565	0.211952	0.572474	0.501348	0.916194	1.11022e-16	1.26222e-15	0.378349	0.0521574	0.114954	0.000857405	0.0351421	BOTH
FBgn0001234	lncRNA:Hsromega	3R:17121849-17143558	+	Known	YES	0.0173761	0.00971039	0.0803455	0.124212	0.739557	0.124799	0.213602	0.667469	3.73495e-12	4.59192e-11	0.000380738	0.0191209	BOTH
FBgn0001258	Ldh	3L:6252205-6255794	-	Known	YES	0.00456761	0.186312	0.536883	0.183702	0.780648	0.000247679	0.000926475	0.54065	7.9949e-07	4.95096e-06	0.0011199	0.0426183	BOTH
FBgn0002563	Lsp1beta	2L:898500-901316	+	Known	YES	0.0117356	0.0338236	0.191711	0.19141	0.78666	0.946122	0.964101	0.83109	2.26719e-22	8.4835e-21	3.15636e-06	0.000364908	BOTH
FBgn0002565	Lsp2	3L:12122493-12124969	+	Known	YES	0.00589267	0.133209	0.446654	0.0371159	0.669831	0.000756065	0.0026006	0.652709	8.69817e-07	5.35974e-06	8.80342e-08	1.55343e-05	BOTH
FBgn0002569	Mal-A2	2R:4341132-4343287	+	Known	YES	0.0183902	0.0077897	0.0685114	0.799857	0.972984	0	0	0.797014	6.5984e-19	1.69132e-17	4.45478e-06	0.000477275	BOTH
FBgn0002570	Mal-A1	2R:4337169-4339409	-	Known	YES	0.00160782	0.433332	0.796985	0.424458	0.890729	0	0	0.786928	1.01862e-21	3.54267e-20	0.000809877	0.0336808	BOTH
FBgn0002571	Mal-A3	2R:4343414-4345397	-	Known	YES	0.0106413	0.0433577	0.225163	0.657183	0.951133	0	0	0.806347	5.31225e-19	1.3732e-17	1.12559e-06	0.000150983	BOTH
FBgn0002645	Map205	3R:27881001-27894163	-	Known	YES	0.00413892	0.208433	0.568002	0.335126	0.859692	9.14318e-06	4.05401e-05	0.902879	0.000543605	0.00196289	1.26228e-48	1.05801e-44	BOTH
FBgn0002926	ndl	3L:6587038-6596466	-	Known	YES	0.000265391	0.750323	0.996122	0.732921	0.963316	0.0041391	0.0121583	0.4336	0.0220054	0.0540535	0.000115267	0.00733309	BASELINE
FBgn0002939	ninaD	2L:18081628-18083608	+	Known	YES	0.030886	0.000540973	0.00819945	0.286908	0.839459	0.154206	0.252116	0.882201	1.17425e-25	6.1132e-24	3.22639e-09	8.32087e-07	BOTH
FBgn0003057	CG10598	X:17119190-17120900	-	Known	YES	0.00150096	0.44905	0.810514	0.413337	0.885862	0.983144	0.989216	0.494969	8.31629e-05	0.000361353	0.000589865	0.0267209	BOTH
FBgn0003091	Pkc53E	2R:12812160-12832631	+	Known	YES	0.0282028	0.000954384	0.013023	0.254822	0.823987	0.101001	0.180773	0.372814	0.0464469	0.103912	0.00127683	0.0465307	BOTH
FBgn0003250	Rh4	3L:16845627-16855617	-	Known	YES	0.00476895	0.176872	0.523059	0.21373	0.803082	0	0	0.833254	7.43005e-27	4.3323e-25	0.000888776	0.0361188	BOTH
FBgn0003285	rst	X:2844432-2867867	-	Known	YES	0.0132596	0.024031	0.151931	0.0227079	0.655419	0.00284314	0.0086628	0.932897	1.43937e-35	1.85607e-33	1.95107e-10	6.67485e-08	BOTH
FBgn0003326	sca	2R:8668046-8689515	+	Known	YES	0.0247925	0.00196968	0.0234925	0.702976	0.958147	1.15761e-10	7.55273e-10	0.507374	0.000316921	0.00120881	8.79461e-05	0.00584235	BOTH
FBgn0003357	Jon99Ciii	3R:25747938-25749177	+	Known	YES	0.0237292	0.00247114	0.0282379	0.0630928	0.686119	2.70894e-14	2.41792e-13	0.713238	8.03683e-16	1.51122e-14	0.000974444	0.0384929	BOTH
FBgn0003358	Jon99Ci	3R:25750948-25751911	-	Known	YES	0.0025149	0.327025	0.703371	0.0172639	0.643733	0	0	0.927279	6.52885e-36	8.65189e-34	8.12797e-09	1.89241e-06	BOTH
FBgn0003386	Shaw	2L:3718185-3729145	+	Known	YES	0.00237787	0.340582	0.716561	0.130231	0.744469	1.31268e-11	9.19454e-11	0.361321	0.143329	0.274139	0.000573055	0.026069	BOTH
FBgn0003710	tipE	3L:4188499-4193788	+	Known	YES	0.000313504	0.729446	0.986339	0.11424	0.729095	9.06826e-09	5.18213e-08	0.781461	3.51956e-21	1.1546e-19	0.000792624	0.033135	BOTH
FBgn0003930	snRNA:U4:39B	2L:21215036-21215178	-	Known	YES	0	1	1	0.555685	0.93257	0.00530273	0.0151437	0.329648	0.999999	1	3.18752e-05	0.00250864	ETOH
FBgn0003938	snRNA:U5:63BC	3L:3090801-3090923	+	Known	YES	0.00110139	0.516732	0.859902	0.374164	0.874328	0.492776	0.608992	0.328466	0.934404	1	9.16733e-05	0.00605026	ETOH
FBgn0003943	Ubi-p63E	3L:3899259-3903184	-	Known	YES	0.00776562	0.0846045	0.34204	0.0659564	0.687533	0.264753	0.382229	0.574313	4.72902e-07	3.03445e-06	0.000184925	0.0108202	BOTH
FBgn0003944	Ubx	3R:12482345-12560148	-	Known	YES	0.0495435	1.06831e-05	0.000289782	0.457317	0.902441	3.29003e-12	2.42562e-11	0.537248	6.47675e-06	3.45389e-05	0.000317615	0.0168628	BOTH
FBgn0004047	Yp3	X:13653579-13655580	+	Known	YES	0.00117446	0.503134	0.849803	0.521565	0.922613	0.000107942	0.000424025	0.797999	7.99565e-21	2.51473e-19	6.57434e-05	0.00460163	BOTH
FBgn0004187	snRNA:U1:95Cc	3R:19652056-19652219	+	Known	YES	0.0229676	0.00290793	0.0320494	0.788132	0.971306	0.897087	0.929392	0.34614	0.147023	0.280006	0.00115988	0.0436937	BOTH
FBgn0004240	DptA	2R:14753270-14753765	+	Known	YES	0.000782048	0.584844	0.904306	0.634172	0.946814	0.000278846	0.00103463	0.552004	1.92062e-06	1.12555e-05	0.000301024	0.0162519	BOTH
FBgn0004368	Ptp4E	X:4833161-4849949	+	Known	YES	0.00999413	0.0502845	0.247367	0.873533	0.984528	4.60719e-08	2.49902e-07	0.543666	9.61711e-07	5.87845e-06	0.00082768	0.0342165	BOTH
FBgn0004427	LysD	3L:1210717-1211196	-	Known	YES	0.360394	5.74857e-39	7.7093e-36	0.233628	0.813008	1.67845e-06	7.99531e-06	0.94025	9.0671e-44	2.81475e-41	3.8797e-06	0.000426475	BOTH
FBgn0004569	aos	3L:16463486-16476750	-	Known	YES	0.00862514	0.0690791	0.302945	0.0864396	0.707641	0.0254306	0.0585173	0.581423	3.83573e-08	2.89445e-07	0.000643592	0.0282342	BOTH
FBgn0004635	rho	3L:1463811-1468944	+	Known	YES	0.000114417	0.834502	1	0.321125	0.854197	3.29146e-07	1.67096e-06	0.529937	1.59977e-05	7.96842e-05	0.000253613	0.0142427	BOTH
FBgn0004636	Rap1	3L:1859115-1862239	-	Known	YES	0.0338755	0.000287899	0.00486267	0.085294	0.707252	5.10703e-15	4.86685e-14	0.517857	6.50747e-06	3.46917e-05	0.00102371	0.0399652	BOTH
FBgn0004784	inaC	2R:12786040-12789080	+	Known	YES	0.0184763	0.00764556	0.0674205	0.716387	0.960381	4.59016e-05	0.00018858	0.570037	5.25371e-06	2.8511e-05	3.78989e-05	0.00289439	BOTH
FBgn0004859	ci	4:68336-77667	-	Known	YES	0.0116011	0.0348668	0.195698	0.0359327	0.667923	0.00298259	0.00904819	0.519052	2.23176e-05	0.000108535	0.000388162	0.0193085	BOTH
FBgn0004919	gol	2R:20960150-20971870	-	Known	YES	0.00728895	0.0947996	0.366	0.0171032	0.643733	0.847679	0.894434	0.521765	6.60347e-05	0.000292425	0.000136019	0.00836751	BOTH
FBgn0005590	scw	2L:19699379-19700968	-	Known	YES	0.000483124	0.667656	0.952052	0.199589	0.790675	0.0560145	0.112588	0.300091	1	1	5.63545e-05	0.00404582	ETOH
FBgn0005614	trpl	2R:5641202-5653023	+	Known	YES	0.0259058	0.00155408	0.0194055	0.429455	0.892006	0.00674073	0.018716	0.818214	5.19634e-21	1.67035e-19	3.79093e-06	0.000418819	BOTH
FBgn0005664	Crys	2L:11944129-11947131	+	Known	YES	0.0827011	9.54324e-09	5.2366e-07	0.0889124	0.711416	0.211405	0.321964	0.80869	1.14369e-15	2.11148e-14	1.23523e-09	3.73096e-07	BOTH
FBgn0005670	Cyp4d1	X:2053178-2056213	-	Known	YES	0.137435	5.90159e-14	8.81842e-12	0.203195	0.795494	0.534076	0.64556	0.902192	1.99363e-32	1.99523e-30	6.17324e-07	9.03801e-05	BOTH
FBgn0010038	GstD2	3R:8197693-8198426	+	Known	YES	0.0091053	0.0617559	0.282584	0.489056	0.912112	0.030366	0.0678302	0.825399	9.37304e-20	2.63183e-18	1.17368e-07	1.99745e-05	BOTH
FBgn0010041	GstD5	3R:8201455-8202294	+	Known	YES	0.0267516	0.00129842	0.0168664	0.0156908	0.640933	0.033861	0.0742774	0.812565	2.57254e-16	5.09147e-15	2.13172e-09	5.81058e-07	BOTH
FBgn0010114	hig	2R:5115290-5134754	-	Known	YES	0.00017125	0.798251	1	0.015148	0.640933	9.99201e-16	1.02949e-14	0.435401	0.00392636	0.0115879	0.000628911	0.0279583	BOTH
FBgn0010194	Wnt5	X:18395434-18399438	-	Known	YES	4.78081e-05	0.89257	1	0.00033513	0.378235	1.95176e-05	8.3855e-05	0.54047	6.48306e-07	4.06961e-06	0.00129692	0.0471094	BOTH
FBgn0010241	Mdr50	2R:10134471-10140102	+	Known	YES	0.00528774	0.154971	0.487002	0.125697	0.740776	7.50166e-08	4.01446e-07	0.952397	5.00573e-45	1.91096e-42	1.77151e-08	3.85673e-06	BOTH
FBgn0010246	Myo61F	3L:1318480-1329617	+	Known	YES	0.000626225	0.624944	0.927527	0.147925	0.755434	0.567001	0.674405	0.596274	3.52025e-09	3.01311e-08	0.00108225	0.0415525	BOTH
FBgn0010263	Rbp9	2L:2954762-2968434	+	Known	YES	0.00196031	0.386922	0.758919	0.997363	0.99973	3.95231e-06	1.81435e-05	0.524271	8.70334e-06	4.53543e-05	0.000571293	0.0260406	BOTH
FBgn0010385	Def	2R:5941683-5942081	-	Known	YES	0.0207652	0.00466393	0.0464274	0.175205	0.775915	1.06852e-08	6.07509e-08	0.84931	4.01272e-28	2.6174e-26	0.000344197	0.0178636	BOTH
FBgn0010395	Itgbn	2L:21053033-21058044	+	Known	YES	6.37019e-06	0.960682	1	0.0504972	0.679301	6.5521e-05	0.000264228	0.574999	7.60212e-08	5.5037e-07	0.00062701	0.0279583	BOTH
FBgn0010877	l(3)05822	3R:14114588-14124601	-	Known	YES	1.38769e-05	0.941997	1	0.22934	0.812532	0	0	0.60077	1.95184e-09	1.72754e-08	0.00114938	0.0434496	BOTH
FBgn0011554	etaTry	2R:7228018-7228928	-	Known	YES	0.00891	0.0646297	0.290577	0.806519	0.974124	0.193848	0.301598	0.738846	1.05297e-15	1.95367e-14	6.91863e-05	0.0048025	BOTH
FBgn0011555	thetaTry	2R:7229219-7230265	-	Known	YES	0.00169757	0.420766	0.785907	0.195131	0.788807	1.66533e-15	1.67513e-14	0.720583	7.03549e-11	7.46452e-10	1.57019e-07	2.55552e-05	BOTH
FBgn0011571	caz	X:16182843-16187553	+	Known	YES	0.00105797	0.525117	0.865821	0.330243	0.857032	0.0843012	0.156447	0.407702	0.0229785	0.0561392	0.000472126	0.0226128	BOTH
FBgn0011661	Moe	X:8767045-8792365	-	Known	YES	0.0237202	0.00247585	0.0282532	0.702764	0.958147	0	0	0.492416	0.000320378	0.00122033	0.000226136	0.0129159	BOTH
FBgn0011822	Pgcl	X:330172-331481	-	Known	YES	0.00506035	0.164166	0.501956	0.998582	0.999755	2.80953e-07	1.43587e-06	0.586359	1.63428e-06	9.6704e-06	2.83693e-05	0.00229612	BOTH
FBgn0011824	CG4038	2R:16983463-16984810	-	Known	YES	0.0150307	0.0162304	0.116074	0.754611	0.966888	0.660668	0.751178	0.462693	0.000678998	0.00239554	0.000669169	0.0290387	BOTH
FBgn0013307	Odc1	2R:3892329-3894177	+	Known	YES	0.00722645	0.0962322	0.369594	0.28608	0.838383	4.14269e-12	3.023e-11	0.790596	2.00175e-18	4.90589e-17	5.54348e-06	0.000563201	BOTH
FBgn0013772	Cyp6a8	2R:10774676-10776515	-	Known	YES	0.0343298	0.000261619	0.00448139	0.952165	0.99309	4.25768e-10	2.67429e-09	0.945785	2.75553e-47	1.28312e-44	3.03864e-05	0.00240843	BOTH
FBgn0013953	Esp	3R:20667657-20676134	+	Known	YES	0.00023984	0.762266	1	0.68871	0.954726	2.56316e-05	0.000108784	0.688036	3.70375e-12	4.55523e-11	6.27243e-05	0.00441798	BOTH
FBgn0014033	Sr-CI	2L:4121702-4124153	+	Known	YES	0.0569122	2.26681e-06	7.20372e-05	0.00501337	0.608945	0.504333	0.619211	0.718002	3.34749e-16	6.54792e-15	0.0010255	0.0399652	BOTH
FBgn0014380	RhoL	3R:5322823-5328303	-	Known	YES	0.00203045	0.37855	0.751861	0.360243	0.87001	5.42114e-05	0.000220798	0.620817	1.66198e-10	1.68683e-09	0.00128291	0.0467016	BOTH
FBgn0014396	tim	2L:3493986-3508119	-	Known	YES	0.0140172	0.0203058	0.135481	0.00261986	0.591391	0.132853	0.224453	0.595551	9.8681e-05	0.000422701	2.25773e-07	3.60451e-05	BOTH
FBgn0014865	Mtk	2R:11296351-11296618	+	Known	YES	0.00726892	0.0952562	0.367123	0.520386	0.922181	1.52152e-07	7.94937e-07	0.514986	9.05164e-06	4.69993e-05	0.000958602	0.038003	BOTH
FBgn0014903	CG14630	X:925538-927198	+	Known	YES	0.000369692	0.707226	0.975246	0.355819	0.868645	6.50121e-11	4.31474e-10	0.73812	6.39675e-14	9.65618e-13	4.60799e-06	0.000485824	BOTH
FBgn0015001	iotaTry	2R:7244225-7245042	+	Known	YES	0.0064185	0.117035	0.415308	0.642804	0.947423	4.23429e-06	1.93743e-05	0.689796	5.5434e-11	5.95875e-10	7.59312e-06	0.0007422	BOTH
FBgn0015035	Cyp4e3	2L:9747839-9750071	-	Known	YES	1.9412e-06	0.97829	1	0.0558313	0.683125	1.42109e-14	1.30063e-13	0.847137	5.81907e-24	2.54031e-22	1.62113e-06	0.000209852	BOTH
FBgn0015316	Try29F	2L:8998537-8999816	+	Known	YES	2.91223e-05	0.916054	1	0.270804	0.830468	0.0134925	0.0340702	0.70423	1.43418e-12	1.85509e-11	2.38434e-05	0.00198362	BOTH
FBgn0015336	CG15865	X:16554931-16558488	-	Known	YES	0.00893503	0.0642535	0.289586	0.886876	0.985863	0.971621	0.981204	0.689124	4.08258e-14	6.31932e-13	0.000876124	0.0357781	BOTH
FBgn0015399	kek1	2L:12817000-12822787	-	Known	YES	5.96157e-05	0.880124	1	0.125223	0.740514	0.173192	0.276012	0.657682	4.50144e-12	5.49199e-11	0.000734422	0.0313269	BOTH
FBgn0015568	alpha-Est1	3R:3371455-3374846	-	Known	YES	0.131504	2.23155e-13	2.87758e-11	0.259038	0.826042	4.62057e-05	0.00018976	0.823815	3.68331e-12	4.53176e-11	4.10264e-15	2.80713e-12	BOTH
FBgn0015569	alpha-Est10	3R:3312305-3319567	-	Known	YES	0.000825543	0.574583	0.897558	0.411892	0.885619	0.0835291	0.155264	0.852157	2.29658e-29	1.68854e-27	0.000907312	0.0366499	BOTH
FBgn0015570	alpha-Est2	3R:3367532-3370952	+	Known	YES	0.0297311	0.000690563	0.00997522	0.392211	0.881742	0.634896	0.731018	0.782867	4.74226e-18	1.11184e-16	9.5434e-06	0.000908982	BOTH
FBgn0015575	alpha-Est7	3R:3345285-3349475	-	Known	YES	0.0282329	0.000948317	0.0129455	0.391489	0.881643	0.663839	0.753624	0.743185	0.00045923	0.0016849	2.69267e-18	2.57935e-15	BOTH
FBgn0015714	Cyp6a17	2R:10761458-10763244	+	Known	YES	0.0160686	0.0129204	0.09881	0.576841	0.936742	0.00745674	0.0204083	0.961666	4.29651e-32	4.17533e-30	5.34161e-27	1.1193e-23	BOTH
FBgn0015773	NetA	X:14498045-14547961	-	Known	YES	0.0340727	0.000276182	0.00468839	0.680645	0.953856	3.33067e-16	3.60914e-15	0.571368	2.95033e-07	1.95485e-06	0.000317872	0.0168628	BOTH
FBgn0015946	grim	3L:18295819-18297517	-	Known	YES	0.00244601	0.333749	0.709811	0.898184	0.987866	0.568468	0.675654	0.326648	0.610157	0.874444	0.000295539	0.0160853	ETOH
FBgn0016031	lama	3L:5336719-5349023	-	Known	YES	0.00763875	0.087197	0.348055	0.701022	0.957915	0.000494816	0.00176066	0.678236	3.65148e-12	4.4959e-11	0.000155363	0.00936845	BOTH
FBgn0016080	xmas-1	X:17045264-17048625	-	Known	YES	0.0396508	8.53961e-05	0.0017373	0.000600247	0.438323	0.979709	0.986834	0.558979	5.25542e-06	2.85157e-05	8.58202e-05	0.00573166	BOTH
FBgn0016123	Alp4	3R:26874651-26878262	+	Known	YES	0.00840443	0.0727506	0.312591	0.983174	0.997699	1.17484e-12	8.9572e-12	0.772506	3.75104e-16	7.29049e-15	1.95207e-06	0.000246969	BOTH
FBgn0016926	Pino	2L:1114654-1128953	-	Known	YES	0.0904883	1.79473e-09	1.16612e-07	0.732739	0.963316	0.0584586	0.116479	0.716219	2.78436e-13	3.88801e-12	2.07494e-05	0.00178376	BOTH
FBgn0017558	Pdk	2R:5313944-5322143	+	Known	YES	0.00679625	0.106754	0.393811	0.0763832	0.697225	0.821493	0.875207	0.556188	7.41337e-07	4.61728e-06	0.000453296	0.0218671	BOTH
FBgn0019650	toy	4:1010351-1028548	+	Known	YES	0.000184775	0.790612	1	0.0234703	0.655419	5.54706e-08	2.99236e-07	0.430557	0.00413008	0.0121209	0.000776069	0.0326349	BOTH
FBgn0019928	Ser8	2R:9321712-9322550	+	Known	YES	0.00222571	0.356537	0.732272	0.214358	0.804037	0	0	0.666316	1.61073e-11	1.83934e-10	0.000169249	0.0100155	BOTH
FBgn0019985	mGluR	4:957445-970067	+	Known	YES	0.0357071	0.000195746	0.00351891	0.76507	0.968455	0.281485	0.400282	0.732905	3.22932e-17	6.99416e-16	0.000927093	0.0372273	BOTH
FBgn0020385	pug	3R:6522256-6529038	+	Known	YES	0.0199991	0.0055007	0.0526769	0.421098	0.889425	0	0	0.691281	2.66781e-13	3.73303e-12	0.00024818	0.0139805	BOTH
FBgn0020415	Idgf2	2L:16447330-16450508	+	Known	YES	0.000178327	0.794216	1	0.509678	0.918456	0.201191	0.310272	0.821939	1.50305e-25	7.72895e-24	0.000941387	0.0376184	BOTH
FBgn0020506	Amyrel	2R:12538600-12540204	-	Known	YES	0.000283922	0.742052	0.992161	0.152988	0.761071	4.79172e-13	3.78326e-12	0.484742	8.61684e-05	0.000373107	0.00102047	0.0399425	BOTH
FBgn0020508	Ag5r2	X:14676995-14678085	-	Known	YES	0.0109298	0.0405987	0.215441	0.136038	0.749788	0.0325027	0.0718007	0.777348	2.12374e-11	2.39337e-10	4.30746e-11	1.64109e-08	BOTH
FBgn0020762	Atet	2L:4333913-4345776	+	Known	YES	0.0519178	6.48497e-06	0.000185513	0.102686	0.720935	0.0651092	0.127086	0.711679	2.64579e-15	4.68597e-14	0.000586231	0.0265962	BOTH
FBgn0020906	Jon25Bi	2L:4954279-4955144	-	Known	YES	0.00447738	0.190732	0.543334	0.100901	0.718335	0.0779521	0.146968	0.698561	1.29433e-12	1.68002e-11	4.56307e-05	0.00340726	BOTH
FBgn0021776	mira	3R:15757521-15760842	-	Known	YES	0.00697054	0.102348	0.383509	0.347754	0.864896	4.32543e-13	3.42964e-12	0.571482	4.26474e-08	3.20018e-07	0.00113219	0.0430374	BOTH
FBgn0021800	Reph	2L:3803545-3810671	+	Known	YES	0.00166031	0.425916	0.79033	0.756369	0.966948	0	0	0.616041	4.5536e-10	4.38702e-09	0.000986668	0.0388263	BOTH
FBgn0022355	Tsf1	X:18281117-18284377	+	Known	YES	0.00779141	0.0840876	0.341377	0.0902221	0.712867	4.44089e-15	4.25017e-14	0.686869	1.37012e-06	8.18824e-06	6.69134e-10	2.05817e-07	BOTH
FBgn0022702	Cht2	3L:1752328-1755934	-	Known	YES	0.000576431	0.639061	0.935945	0.00989936	0.640933	0.0159409	0.0392994	0.804204	8.78721e-19	2.23019e-17	1.12496e-06	0.000150983	BOTH
FBgn0023197	Jon74E	3L:17539839-17542227	-	Known	YES	0.286905	6.76305e-30	5.66862e-27	0.923391	0.990437	0.550359	0.659489	0.972354	2.46568e-59	5.51112e-56	2.37934e-06	0.00028695	BOTH
FBgn0023416	Ac3	2L:21632587-21647964	+	Known	YES	0.0144692	0.0183717	0.126816	0.134385	0.748958	4.06771e-09	2.38429e-08	0.520842	0.00213948	0.00672347	4.57714e-06	0.000485824	BOTH
FBgn0023479	teq	3L:9067743-9085231	+	Known	YES	0.0103055	0.0468165	0.236295	0.263257	0.828843	0.0904702	0.165585	0.789959	0.0239909	0.0583618	3.6074e-28	8.63895e-25	BOTH
FBgn0023541	Cyp4d14	X:2067448-2069348	-	Known	YES	0.038774	0.00010268	0.00203821	0.1081	0.723886	8.08091e-11	5.32835e-10	0.887089	2.26353e-34	2.72005e-32	0.00047494	0.0226828	BOTH
FBgn0024289	Sodh-1	3R:2878057-2880263	+	Known	YES	5.26923e-05	0.887251	1	0.13635	0.749848	0	0	0.6132	2.16813e-06	1.26024e-05	2.15601e-06	0.000265752	BOTH
FBgn0024806	DIP2	3L:250229-257954	-	Known	YES	0.0060719	0.127434	0.435344	0.330662	0.857336	1.11022e-16	1.26222e-15	0.357294	0.0828374	0.17186	0.00138909	0.0497034	BASELINE
FBgn0024963	GluClalpha	3R:15556437-15600953	+	Known	YES	0.00833644	0.0739231	0.315602	0.116632	0.731969	1.41371e-08	7.9714e-08	0.49108	5.38425e-05	0.000242631	0.00102099	0.0399425	BOTH
FBgn0025583	IM2	2R:14274107-14274535	+	Known	YES	0.0605544	1.0519e-06	3.64329e-05	0.641617	0.947423	0	0	0.605068	1.81593e-08	1.42583e-07	0.000204765	0.0118365	BOTH
FBgn0025595	AkhR	2L:6711286-6716186	-	Known	YES	0.00114716	0.508141	0.854128	0.0604433	0.685423	0	0	0.725231	9.06197e-10	8.39515e-09	7.30922e-09	1.72575e-06	BOTH
FBgn0025692	Lfg	2R:8762669-8764471	-	Known	YES	0.016855	0.0108789	0.0870078	0.911743	0.989679	3.10448e-06	1.44014e-05	0.630787	2.42981e-05	0.000117372	2.74852e-08	5.68825e-06	BOTH
FBgn0025702	Srpk79D	3L:22267085-22277435	+	Known	YES	0.00593316	0.131879	0.444142	0.104471	0.722409	1.6398e-13	1.35202e-12	0.501406	0.00028071	0.00108426	0.00014475	0.00883627	BOTH
FBgn0025739	pon	X:4530351-4533145	+	Known	YES	0.00958043	0.0553151	0.263618	0.967918	0.995589	1.2298e-07	6.47367e-07	0.837001	1.25483e-25	6.52257e-24	0.000116136	0.00736048	BOTH
FBgn0025836	RhoGAP1A	X:23836-36727	+	Known	YES	0.00473742	0.178314	0.524921	0.375804	0.874441	3.55271e-15	3.43545e-14	0.830009	2.3833e-17	5.24311e-16	3.51635e-10	1.16725e-07	BOTH
FBgn0025837	CG17636	X:20757-23101	-	Known	YES	9.95595e-05	0.845475	1	0.111135	0.725289	0.19502	0.303022	0.86978	3.04399e-16	5.98217e-15	6.7898e-17	5.55224e-14	BOTH
FBgn0026084	cib	X:4000146-4005014	+	Known	YES	0.000127983	0.825114	1	0.393578	0.881742	0	0	0.366412	0.159205	0.299146	0.000381614	0.0191209	BOTH
FBgn0026169	snoRNA:Psi18S-1820	2R:20063751-20063890	+	Known	YES	0.0134571	0.022997	0.147533	0.56376	0.93498	0.113139	0.197787	0.416434	0.999999	1	8.48856e-08	1.51381e-05	ETOH
FBgn0026197	lncRNA:noe	3L:17393447-17394448	-	Known	YES	0.0194765	0.00615747	0.0575207	0.475379	0.907173	6.01386e-12	4.33277e-11	0.850194	1.09337e-26	6.30937e-25	4.81859e-05	0.00354283	BOTH
FBgn0026438	Eaat2	2L:737212-744395	-	Known	YES	0.00179245	0.408064	0.775665	0.686044	0.954305	1.12835e-06	5.46738e-06	0.548016	7.11499e-06	3.77145e-05	0.000144956	0.00883627	BOTH
FBgn0026563	CG1979	3R:2880308-2884393	+	Known	YES	0.000608368	0.629924	0.930889	0.0199782	0.650879	0	0	0.493382	5.51541e-05	0.000247909	0.000882495	0.0359507	BOTH
FBgn0026570	CG5704	3L:2169553-2170971	-	Known	YES	0.108634	3.5035e-11	3.17464e-09	0.969079	0.996125	1.65039e-06	7.87057e-06	0.752954	2.12767e-18	5.18796e-17	0.000568397	0.0259627	BOTH
FBgn0026755	Ugt37b1	2L:6225048-6226842	+	Known	YES	0.000204769	0.779851	1	0.874608	0.984909	0.678414	0.76558	0.750374	1.89709e-16	3.80405e-15	5.54702e-05	0.00400808	BOTH
FBgn0027070	CG17322	2L:18826770-18829059	+	Known	YES	5.68372e-08	0.996285	1	0.0757227	0.697225	0	0	0.918287	1.47388e-41	3.38457e-39	0.000803173	0.0334509	BOTH
FBgn0027339	jim	3L:22782333-22828294	-	Known	YES	0.000567185	0.641764	0.937519	0.0185426	0.645654	1.81515e-07	9.42617e-07	0.546184	3.62543e-07	2.36939e-06	0.00134897	0.0485268	BOTH
FBgn0027376	rha	3R:21165974-21170560	+	Known	YES	0.0172744	0.00992788	0.0815015	0.604213	0.942347	0.0764857	0.14483	0.324586	0.937662	1	0.000112142	0.0071816	ETOH
FBgn0027552	CG10863	3L:3941008-3942465	-	Known	YES	0.00602926	0.128782	0.437943	0.757985	0.967168	0	0	0.78976	5.28354e-19	1.36683e-17	1.52979e-05	0.00137138	BOTH
FBgn0027562	CG10345	3R:12422795-12430583	-	Known	YES	0.00841784	0.0725216	0.312272	0.0262062	0.656712	8.17774e-11	5.39007e-10	0.598465	5.53534e-08	4.09044e-07	0.000152731	0.00922631	BOTH
FBgn0027571	CG3523	2L:3056598-3068177	+	Known	YES	0.00328458	0.262575	0.634622	0.00987818	0.640933	4.7562e-13	3.75698e-12	0.542655	6.08951e-06	3.26348e-05	0.000234395	0.013297	BOTH
FBgn0027584	CG4757	3R:6986929-6989220	+	Known	YES	0.033849	0.000289509	0.00488493	0.554165	0.931437	7.23049e-08	3.87491e-07	0.83769	1.89049e-26	1.07793e-24	0.000290434	0.0158848	BOTH
FBgn0027611	LManII	2L:10457658-10462472	+	Known	YES	0.00953555	0.055892	0.265326	0.75871	0.967308	0.0919753	0.167717	0.877186	2.18582e-33	2.42663e-31	0.00109511	0.0419607	BOTH
FBgn0027844	CAH1	2L:13803626-13809994	+	Known	YES	0.00243064	0.335274	0.711349	0.277417	0.834217	0	0	0.58412	0.000108855	0.000461564	6.06422e-07	8.99624e-05	BOTH
FBgn0027932	Akap200	2L:8415690-8431297	+	Known	YES	0.0127327	0.0270329	0.164877	0.258993	0.826042	1.37508e-11	9.61751e-11	0.432955	0.00404318	0.0118981	0.000697328	0.030012	BOTH
FBgn0028369	kirre	X:2634417-3028565	+	Known	YES	0.000703775	0.604283	0.914209	0.0880209	0.710161	9.88537e-09	5.63179e-08	0.838721	9.1916e-27	5.32239e-25	0.000361257	0.0184868	BOTH
FBgn0028396	TotA	3R:16696758-16697422	+	Known	YES	0.01137	0.0367379	0.20228	0.705514	0.958336	6.62548e-07	3.27667e-06	0.789292	4.61718e-21	1.49133e-19	0.000277875	0.0153481	BOTH
FBgn0028422	GluRIID	3R:16474317-16478172	-	Known	YES	0.00868166	0.068171	0.300101	0.539777	0.928133	0.0292734	0.0658476	0.492011	0.00276447	0.00843506	2.84215e-05	0.00229612	BOTH
FBgn0028480	CG17841	X:10262085-10277613	+	Known	YES	0.0281294	0.00096933	0.0131894	0.766654	0.968576	4.62659e-05	0.000189984	0.679095	6.02785e-10	5.72185e-09	3.644e-06	0.000412745	BOTH
FBgn0028482	bdl	2L:4324554-4331830	+	Known	YES	0.00245823	0.332543	0.708603	0.0346089	0.665694	6.68454e-12	4.80461e-11	0.653398	5.23551e-07	3.33265e-06	1.36962e-07	2.28455e-05	BOTH
FBgn0028519	hll	2L:14027001-14029368	+	Known	YES	0.0409073	6.55764e-05	0.00138276	0.389253	0.880261	0	0	0.734274	7.94354e-13	1.05642e-11	1.09937e-06	0.000149225	BOTH
FBgn0028526	CG15293	2L:14108057-14109447	-	Known	YES	0.0305028	0.000586596	0.00876026	0.523505	0.923	0	0	0.786691	8.02581e-18	1.84176e-16	3.79757e-06	0.000418819	BOTH
FBgn0028532	CG7968	2L:13849400-13850329	+	Known	YES	0.00945449	0.05695	0.268169	0.975537	0.996774	0	0	0.609526	8.62922e-06	4.5015e-05	7.91669e-07	0.000110245	BOTH
FBgn0028533	CG7953	2L:13847925-13849223	+	Known	YES	6.28791e-07	0.987643	1	0.809554	0.974307	0	0	0.759148	1.50444e-12	1.94222e-11	1.6728e-08	3.66562e-06	BOTH
FBgn0028534	CG7916	2L:13846752-13847799	+	Known	YES	0.0270792	0.00121119	0.0159684	0.691446	0.955173	0	0	0.797003	2.0663e-16	4.13345e-15	5.66418e-08	1.05502e-05	BOTH
FBgn0028920	CG8997	2L:13843915-13845325	-	Known	YES	0.000876028	0.563108	0.890476	0.4735	0.906278	0	0	0.782057	1.11602e-13	1.63821e-12	3.45054e-09	8.76412e-07	BOTH
FBgn0028945	CG7631	2L:15628678-15629552	+	Known	YES	0.013809	0.0212662	0.139992	0.562651	0.934572	0.000989231	0.00332883	0.721456	3.87135e-07	2.51833e-06	1.44983e-11	6.23186e-09	BOTH
FBgn0028950	CG15255	2L:15610171-15611719	-	Known	YES	0.0303704	0.000603246	0.00894913	0.230598	0.813008	0.486641	0.603503	0.777671	5.61995e-18	1.30756e-16	1.75312e-05	0.00153972	BOTH
FBgn0028993	scro	3LHet:207494-252455	+	Known	YES	0	1	1	0.622944	0.944438	0.0128853	0.0327121	0.640469	8.90513e-09	7.2537e-08	1.90904e-05	0.00165386	BOTH
FBgn0029114	Tollo	3L:15228719-15235932	+	Known	YES	0.0166816	0.0112986	0.0895526	0.992088	0.998547	0.00292583	0.00889129	0.868344	1.01847e-28	6.96609e-27	2.08464e-05	0.00178607	BOTH
FBgn0029568	CG11381	X:1097810-1099466	+	Known	YES	0.000122426	0.828893	1	0.602802	0.942149	1.20468e-05	5.28413e-05	0.352351	0.393646	0.62386	0.000184549	0.0108171	BOTH
FBgn0029608	CG3091	X:2146365-2148230	-	Known	YES	0.228927	2.30278e-23	9.41528e-21	0.485807	0.911415	3.87335e-05	0.000160826	0.794051	7.5844e-23	2.99155e-21	0.00131708	0.0477378	BOTH
FBgn0029697	CG15570	X:4112203-4117364	+	Known	YES	0.0029374	0.289431	0.664914	0.421417	0.88957	0.00536148	0.0152906	0.418349	0.217876	0.38789	1.07027e-05	0.00100232	BOTH
FBgn0029768	SPR	X:5340689-5388045	+	Known	YES	0.000169909	0.799025	1	0.41353	0.886023	1.33227e-15	1.35228e-14	0.630306	1.9433e-10	1.95655e-09	0.000604865	0.027294	BOTH
FBgn0029831	CG5966	X:5882824-5886673	+	Known	YES	0.0189419	0.0069121	0.0626499	0.835997	0.979215	0.258647	0.375696	0.572854	2.00591e-07	1.36636e-06	0.0003763	0.0189717	BOTH
FBgn0029834	CG5937	X:5934038-5944414	+	Known	YES	0.00102274	0.532102	0.870531	0.956446	0.994241	0	0	0.312657	0.827588	1	0.000295486	0.0160853	BOTH
FBgn0029866	CG3842	X:6231795-6237764	+	Known	YES	0.00433255	0.198082	0.55324	0.950969	0.992918	0.134401	0.226395	0.788919	4.85276e-21	1.56591e-19	0.000282999	0.0156054	BOTH
FBgn0029887	CG3198	X:6562572-6568006	-	Known	YES	0.00211897	0.368344	0.743744	0.873354	0.984528	0.000546548	0.00193072	0.417283	0.00950399	0.0255792	0.000706981	0.0303884	BOTH
FBgn0029935	CG4615	X:6992611-6996333	-	Known	YES	0.000284821	0.741658	0.992035	0.050352	0.679301	4.65359e-07	2.33313e-06	0.477596	0.000266918	0.0010354	0.000629961	0.0279583	BOTH
FBgn0029939	CG9650	X:7031756-7135965	+	Known	YES	0.0123913	0.029182	0.173032	0.144436	0.754742	1.95198e-08	1.08585e-07	0.810656	2.28814e-23	9.4128e-22	0.000321537	0.0170303	BOTH
FBgn0029966	Ir7c	X:7768427-7770880	+	Known	YES	0.000602965	0.631449	0.931742	0.923729	0.990437	0.403947	0.52483	0.475529	0.00725086	0.0200561	2.95671e-05	0.00236023	BOTH
FBgn0029990	CG2233	X:7929774-7931550	-	Known	YES	0.0385876	0.000106784	0.0021072	0.711382	0.959436	0	0	0.824718	2.80159e-21	9.26321e-20	1.81487e-06	0.000231358	BOTH
FBgn0030038	CG1440	X:8331090-8335297	+	Known	YES	0.0806319	1.48522e-08	7.81709e-07	0.410257	0.885071	3.99658e-12	2.92338e-11	0.712171	5.21124e-15	8.85542e-14	0.000383253	0.0191495	BOTH
FBgn0030098	CG12057	X:9085690-9086581	+	Known	YES	0.0262877	0.00143289	0.0182386	0.94174	0.992145	0	0	0.906635	1.05056e-24	4.97488e-23	1.65713e-14	1.01016e-11	BOTH
FBgn0030157	CG1468	X:9772455-9773312	+	Known	YES	3.75752e-05	0.904697	1	0.223625	0.80891	0.00224226	0.00699214	0.576792	1.79965e-05	8.88613e-05	7.3339e-06	0.000723187	BOTH
FBgn0030270	CG15199	X:11034507-11035868	-	Known	YES	0.0113326	0.0370503	0.20327	0.947066	0.992718	5.69701e-08	3.07078e-07	0.809422	3.53923e-09	3.02858e-08	2.67725e-17	2.244e-14	BOTH
FBgn0030439	CG12716	X:12868716-12870264	-	Known	YES	0.00478796	0.17601	0.521855	0.746723	0.965393	8.58324e-06	3.81735e-05	0.390934	0.0429467	0.097105	0.000566272	0.0259363	BOTH
FBgn0030456	CG4332	X:13049071-13051405	+	Known	YES	8.80417e-05	0.854583	1	0.885927	0.985863	0	0	0.660236	8.46285e-12	1.00366e-10	0.000415885	0.020385	BOTH
FBgn0030482	CG1673	X:13290932-13295257	+	Known	YES	0.00389084	0.222643	0.586462	0.74135	0.964365	1.00387e-06	4.89037e-06	0.70211	1.00121e-13	1.47874e-12	0.000168421	0.0100155	BOTH
FBgn0030484	GstT4	X:13298782-13303356	+	Known	YES	0.000107776	0.839309	1	0.557298	0.933192	0.00771955	0.0210674	0.627776	8.05595e-11	8.50682e-10	0.00121081	0.0450235	BOTH
FBgn0030596	CG12398	X:14805814-14807845	-	Known	YES	0.000424926	0.68719	0.963791	0.799196	0.972984	0.000542225	0.0019162	0.626353	1.51592e-10	1.54717e-09	0.000927623	0.0372273	BOTH
FBgn0030608	Lsd-2	X:14963160-14970253	-	Known	YES	0.00151931	0.446289	0.808141	0.866802	0.983761	0.0163356	0.040122	0.51687	0.000148816	0.00061204	9.28112e-05	0.00611332	BOTH
FBgn0030615	Cyp4s3	X:15007335-15010575	-	Known	YES	0.0489679	1.20568e-05	0.000322	0.29959	0.84511	0	0	0.639166	3.70913e-09	3.1644e-08	4.1576e-05	0.00314655	BOTH
FBgn0030647	CG6324	X:15370124-15375755	+	Known	YES	0.000201647	0.781493	1	0.827457	0.978305	0.0546066	0.110233	0.311636	0.81245	1	0.000325988	0.0171846	ETOH
FBgn0030707	CG8916	X:15815988-15818591	+	Known	YES	9.9376e-05	0.845616	1	0.0303148	0.664932	0.900193	0.931631	0.47661	0.829675	1	2.86754e-09	7.57009e-07	BOTH
FBgn0030723	dpr18	X:15957771-15964337	+	Known	YES	0.00815788	0.0770999	0.324129	0.22774	0.811711	0.0161328	0.0396848	0.352256	0.185255	0.339235	0.000630513	0.0279583	BOTH
FBgn0030773	CG9676	X:16593185-16594203	-	Known	YES	0.00274425	0.305883	0.683146	0.129491	0.744469	0	0	0.783208	5.5003e-16	1.05196e-14	2.78023e-07	4.33548e-05	BOTH
FBgn0030777	CG9672	X:16600004-16600907	-	Known	YES	0.000657708	0.616373	0.922468	0.579995	0.938062	3.60289e-09	2.11999e-08	0.770321	1.28863e-17	2.8841e-16	2.69893e-05	0.00222327	BOTH
FBgn0030816	CG16700	X:16985887-16992521	+	Known	YES	0.0035434	0.244543	0.613448	0.283605	0.837613	1.58762e-14	1.44673e-13	0.727478	2.89788e-13	4.0398e-12	5.56854e-06	0.000564038	BOTH
FBgn0030837	CG8661	X:17177795-17178533	-	Known	YES	0.00757278	0.0885787	0.351518	0.17866	0.779239	2.96084e-08	1.62975e-07	0.823081	0.0181048	0.0454103	3.85814e-33	1.6169e-29	BOTH
FBgn0030847	CG12991	X:17473894-17493347	+	Known	YES	0.00218038	0.361486	0.736665	0.180686	0.779905	0.383716	0.50441	0.530414	3.57628e-05	0.000166901	0.000128306	0.00801064	BOTH
FBgn0030852	CG8316	X:17523824-17526080	-	Known	YES	0.000723241	0.599324	0.911437	0.518482	0.921455	7.50568e-11	4.96273e-10	0.80613	2.75367e-21	9.13177e-20	3.93721e-05	0.00300007	BOTH
FBgn0030863	CG8188	X:17592950-17597057	-	Known	YES	0.00635056	0.118997	0.419254	0.043943	0.67347	0	0	0.449024	0.163582	0.305862	2.14246e-06	0.000265479	BASELINE
FBgn0030887	CG6867	X:17917903-17922294	+	Known	YES	0.000190377	0.787537	1	0.886614	0.985863	5.31107e-10	3.31235e-09	0.622764	4.53384e-09	3.82887e-08	0.000139079	0.00852452	BOTH
FBgn0030929	CG15043	X:18387226-18388201	-	Known	YES	0.0167259	0.0111898	0.0888587	0.363455	0.870919	0.000195641	0.000742342	0.727557	3.30813e-08	2.51957e-07	1.03426e-10	3.68891e-08	BOTH
FBgn0030938	CG15047	X:18422716-18423626	+	Known	YES	0.00429386	0.200101	0.556146	0.818179	0.976038	2.89159e-10	1.83689e-09	0.669163	1.50195e-10	1.53337e-09	2.86282e-05	0.00229732	BOTH
FBgn0030976	CG7378	X:18794443-18805876	+	Known	YES	0.014551	0.0180426	0.125233	0.477616	0.907493	0.063962	0.125248	0.571137	1.71026e-06	1.00933e-05	8.7335e-05	0.00582123	BOTH
FBgn0031033	CG14219	X:19481381-19484203	-	Known	YES	0.0789398	2.1314e-08	1.08272e-06	0.662293	0.951612	0.0170033	0.0415428	0.545741	7.26414e-06	3.84227e-05	0.000166428	0.00994622	BOTH
FBgn0031034	CG14205	X:19486642-19489581	+	Known	YES	0.0458329	2.32976e-05	0.000569729	0.880618	0.985514	0	0	0.717903	1.33784e-14	2.16789e-13	0.000126875	0.0079509	BOTH
FBgn0031081	Nep3	X:19855330-19863356	+	Known	YES	0.0202456	0.00521599	0.0505539	0.254419	0.823558	1.41355e-07	7.41067e-07	0.479697	0.000666857	0.00235717	0.000256002	0.014305	BOTH
FBgn0031150	bves	X:20924990-20953418	+	Known	YES	0.0404093	7.28102e-05	0.0015134	0.521234	0.922565	5.49116e-10	3.42085e-09	0.799697	1.30438e-21	4.46243e-20	0.000149744	0.00907857	BOTH
FBgn0031170	ABCA	X:21163335-21177692	-	Known	YES	0.000763257	0.589392	0.906378	0.470435	0.905103	2.5408e-10	1.61958e-09	0.594754	1.17424e-08	9.42514e-08	0.000567276	0.0259469	BOTH
FBgn0031176	whe	X:21273366-21273799	-	Known	YES	0.112939	1.36403e-11	1.32556e-09	0.157495	0.763554	3.29112e-10	2.08162e-09	0.924268	1.71889e-43	5.19182e-41	0.00116708	0.0438661	BOTH
FBgn0031220	CG4822	2L:116970-121754	-	Known	YES	0.000367042	0.708229	0.975487	0.455276	0.901977	6.16274e-12	4.43527e-11	0.717951	1.32147e-15	2.42369e-14	0.000490598	0.023253	BOTH
FBgn0031248	CG11912	2L:318362-319259	-	Known	YES	0.0298529	0.00067299	0.0097913	0.10044	0.718335	0.00102196	0.00342999	0.921674	1.46237e-37	2.22859e-35	1.52252e-06	0.00019862	BOTH
FBgn0031306	CG4577	2L:1134693-1141156	+	Known	YES	0.00476786	0.176922	0.523059	0.343374	0.863763	1.42433e-06	6.82748e-06	0.454257	0.000587452	0.00210557	0.00118371	0.0442926	BOTH
FBgn0031406	Send1	2L:2254176-2255050	-	Known	YES	1.06345e-05	0.949213	1	0.597213	0.941087	0.0728981	0.139383	0.904291	1.45344e-37	2.22509e-35	0.000364463	0.0185422	BOTH
FBgn0031412	CG16995	2L:2307948-2308872	+	Known	YES	0.0220303	0.00355433	0.0375563	0.519851	0.921725	0.000725475	0.00250515	0.719087	1.40259e-06	8.36587e-06	4.07252e-12	1.8704e-09	BOTH
FBgn0031417	CG3597	2L:2370152-2371524	-	Known	YES	0.00538855	0.151082	0.480126	0.0920732	0.713763	1.41673e-08	7.98709e-08	0.658554	3.12041e-09	2.68941e-08	7.94554e-06	0.00077439	BOTH
FBgn0031424	VGlut	2L:2391660-2410662	+	Known	YES	0.0103881	0.0459399	0.233332	0.0481695	0.679301	3.85293e-07	1.94422e-06	0.428169	0.00448148	0.0130369	0.000815976	0.0338579	BOTH
FBgn0031432	Cyp309a1	2L:2562483-2564830	-	Known	YES	0.00333225	0.259134	0.630349	0.34184	0.863384	0	0	0.853499	3.71185e-20	1.0926e-18	2.98058e-10	9.993e-08	BOTH
FBgn0031453	Bacc	2L:2752445-2757975	+	Known	YES	0.0227008	0.00307875	0.0336335	0.898697	0.987915	7.44948e-08	3.98771e-07	0.499293	0.00174839	0.00560744	2.81085e-05	0.00228736	BOTH
FBgn0031461	daw	2L:2805261-2812376	+	Known	YES	0.0285818	0.000880742	0.012207	0.149506	0.758404	0	0	0.743181	5.38873e-12	6.51055e-11	6.34054e-08	1.16802e-05	BOTH
FBgn0031489	CG17224	2L:3016441-3018308	-	Known	YES	0.02494	0.00190875	0.0228389	0.932009	0.990804	0.837314	0.88682	0.865418	2.12099e-24	9.78136e-23	4.44124e-08	8.46031e-06	BOTH
FBgn0031490	CG17264	2L:3018508-3021506	+	Known	YES	0.307455	2.4538e-32	2.64704e-29	0.00745651	0.640933	0.585694	0.690326	0.740465	3.47481e-15	6.0551e-14	2.66412e-05	0.0022	BOTH
FBgn0031514	CG3332	2L:3275800-3280534	-	Known	YES	0.0060779	0.127245	0.435036	0.103822	0.721982	0	0	0.6624	0.00449091	0.0130577	1.61235e-13	8.71894e-11	BOTH
FBgn0031515	CG9664	2L:3291245-3294706	-	Known	YES	0.0760264	3.96565e-08	1.87527e-06	0.586111	0.939146	2.40336e-05	0.00010217	0.807686	1.34241e-23	5.68988e-22	0.000621772	0.0278299	BOTH
FBgn0031558	CG16704	2L:3692123-3692587	-	Known	YES	0.029335	0.000750922	0.0106905	0.476329	0.907173	0	0	0.875346	1.31061e-28	8.84118e-27	3.54421e-06	0.000404172	BOTH
FBgn0031562	CG3604	2L:3697242-3697872	-	Known	YES	0.00270024	0.309798	0.686651	0.639008	0.947423	0.0168165	0.0411704	0.864932	4.14298e-30	3.26828e-28	0.000248528	0.0139805	BOTH
FBgn0031571	bark	2L:3787167-3802726	+	Known	YES	0.0012973	0.481598	0.833798	0.0946765	0.713763	0.872621	0.912337	0.698217	1.10766e-14	1.8142e-13	0.000847262	0.034897	BOTH
FBgn0031632	CG15628	2L:4821774-4828945	+	Known	YES	0.0212429	0.00420872	0.0428372	0.751087	0.966674	2.07723e-12	1.55785e-11	0.722442	6.02694e-14	9.13083e-13	2.99713e-05	0.00238681	BOTH
FBgn0031636	CG12194	2L:4838347-4841465	+	Known	YES	0.0160269	0.0130391	0.099423	0.768349	0.968582	4.26992e-13	3.38803e-12	0.807785	4.62846e-14	7.1248e-13	3.9752e-11	1.53192e-08	BOTH
FBgn0031653	Jon25Biii	2L:4949941-4950767	-	Known	YES	2.77167e-07	0.991796	1	0.184227	0.781293	1.02578e-08	5.83701e-08	0.783073	4.19872e-18	9.87864e-17	1.00599e-05	0.00095008	BOTH
FBgn0031689	Cyp28d1	2L:5210460-5212445	+	Known	YES	0.0237058	0.00248347	0.0283115	0.0658119	0.687533	0	0	0.816653	4.83735e-22	1.73456e-20	2.31235e-05	0.00193332	BOTH
FBgn0031693	Cyp4ac1	2L:5264001-5265899	+	Known	YES	0.000912633	0.555061	0.885027	0.753227	0.966888	0.0643797	0.12594	0.93168	5.53099e-41	1.21998e-38	3.74878e-06	0.000416462	BOTH
FBgn0031695	Cyp4ac3	2L:5268498-5270329	+	Known	YES	0.048954	1.20921e-05	0.000322523	0.604648	0.94253	0.00057833	0.0020335	0.791857	1.58225e-21	5.38012e-20	0.000363077	0.0184998	BOTH
FBgn0031752	CG9044	2L:5949450-5955235	+	Known	YES	0.00014727	0.812626	1	0.440798	0.895391	3.0782e-09	1.8186e-08	0.528699	7.25174e-05	0.000318315	7.86676e-05	0.00536075	BOTH
FBgn0031760	Tsp26A	2L:6000228-6003738	+	Known	YES	0.0500593	9.58536e-06	0.000263201	0.537564	0.927325	1.08319e-06	5.25845e-06	0.864379	3.08504e-29	2.24853e-27	9.36471e-05	0.00615629	BOTH
FBgn0031802	ppk7	2L:6352324-6354331	-	Known	RARE	0.0033826	0.25556	0.626427	0.659697	0.951314	0.902907	0.933373	0.291132	0.914626	1	0.00065533	0.0285756	BASELINE
FBgn0031805	CG9505	2L:6367882-6370190	+	Known	YES	0.0179936	0.00849001	0.0728177	0.0393498	0.671288	2.18063e-11	1.50013e-10	0.621469	9.23012e-07	5.66773e-06	2.18911e-06	0.000268844	BOTH
FBgn0031910	CG15818	2L:7410909-7412229	+	Known	YES	0.117028	5.54852e-12	5.81329e-10	0.596219	0.941087	3.31442e-07	1.6821e-06	0.904001	6.58128e-29	4.61612e-27	6.11683e-10	1.91663e-07	BOTH
FBgn0031929	CG18585	2L:7689311-7691061	-	Known	YES	0.00613932	0.125333	0.431777	0.98659	0.997699	1.9659e-08	1.09342e-07	0.701545	3.66106e-12	4.50604e-11	1.62951e-05	0.00145137	BOTH
FBgn0031930	CG7025	2L:7691109-7692683	-	Known	YES	0.0288687	0.000828826	0.0115837	0.758996	0.96739	3.51696e-05	0.000146756	0.927387	3.22318e-40	6.5493e-38	7.52185e-06	0.000737383	BOTH
FBgn0031937	CG13795	2L:7723045-7726298	-	Known	YES	0.00787946	0.0823487	0.337519	0.992071	0.998547	4.44089e-16	4.71912e-15	0.875171	1.23641e-30	1.03374e-28	6.28818e-05	0.00441979	BOTH
FBgn0031968	CG7231	2L:7983946-7986785	+	Known	YES	0.102094	1.45812e-10	1.15298e-08	0.651221	0.949566	0.000362865	0.00132179	0.715681	1.63004e-15	2.95887e-14	0.000536288	0.0248747	BOTH
FBgn0031970	CG7227	2L:7994388-7998151	-	Known	YES	0.0251017	0.0018441	0.0221842	0.107675	0.723652	5.18513e-06	2.35545e-05	0.808314	8.72334e-18	1.99229e-16	9.21358e-08	1.60887e-05	BOTH
FBgn0032002	CG8353	2L:8214045-8215239	+	Known	YES	7.69345e-07	0.986331	1	0.387695	0.879569	0.00070536	0.00244274	0.633242	0.000244344	0.000955237	1.0982e-09	3.34722e-07	BOTH
FBgn0032066	LManIII	2L:8765273-8768710	-	Known	YES	0.00304411	0.280823	0.656494	0.950744	0.992838	0	0	0.691415	2.39871e-10	2.39137e-09	1.99849e-06	0.000250012	BOTH
FBgn0032068	LManV	2L:8772946-8776263	-	Known	YES	0.00906103	0.0623953	0.284316	0.161449	0.767099	5.96168e-09	3.45754e-08	0.761466	3.58189e-11	3.94338e-10	5.13515e-10	1.65545e-07	BOTH
FBgn0032069	LManVI	2L:8777661-8781252	-	Known	YES	0.00391399	0.221269	0.585101	0.0767539	0.697403	4.95316e-06	2.25251e-05	0.787797	4.95828e-17	1.05346e-15	8.49547e-07	0.000117213	BOTH
FBgn0032076	CG9510	2L:8939725-8942105	-	Known	YES	0.0212818	0.00417362	0.0425704	0.607369	0.942662	0	0	0.684799	1.34503e-08	1.0719e-07	1.23841e-07	2.09699e-05	BOTH
FBgn0032088	CG13102	2L:9012188-9014149	+	Known	YES	0.00174956	0.413735	0.781063	0.0913687	0.713763	0.0232918	0.0542455	0.81222	1.8686e-22	7.07893e-21	8.03945e-05	0.00545625	BOTH
FBgn0032116	Mco1	2L:9416588-9426342	+	Known	YES	0.0138794	0.0209361	0.138447	0.505518	0.917237	0.000758418	0.00260816	0.807165	8.31219e-23	3.26326e-21	0.000255586	0.014305	BOTH
FBgn0032131	CG3841	2L:9589476-9591783	+	Known	YES	0.0856718	5.05104e-09	2.99728e-07	0.674859	0.953166	0	0	0.788584	1.96462e-21	6.62653e-20	0.00047784	0.022747	BOTH
FBgn0032144	CG17633	2L:9769060-9770409	+	Known	YES	0.000926383	0.552094	0.882861	0.392737	0.881742	0	0	0.76981	2.47444e-12	3.10947e-11	1.67314e-09	4.78845e-07	BOTH
FBgn0032219	CG4995	2L:10322476-10324990	+	Known	YES	0.0130406	0.0252346	0.157257	0.0949524	0.713763	0.0353986	0.0771304	0.61899	8.26831e-09	6.75303e-08	0.000122909	0.00771678	BOTH
FBgn0032235	CG5096	2L:10382263-10384723	+	Known	YES	0.000957905	0.545404	0.877905	0.111225	0.725289	2.47099e-07	1.26904e-06	0.636123	4.67456e-10	4.4971e-09	0.000225058	0.0128763	BOTH
FBgn0032253	LManI	2L:10452677-10457241	-	Known	YES	0.00288519	0.293764	0.66991	0.57608	0.936742	0	0	0.904245	2.85529e-31	2.53252e-29	4.4203e-08	8.46031e-06	BOTH
FBgn0032264	Lip4	2L:10527572-10531778	+	Known	YES	0.0421051	5.09845e-05	0.00111286	0.171186	0.771457	0.250186	0.365896	0.714798	1.7149e-15	3.1045e-14	0.000564451	0.0258883	BOTH
FBgn0032285	CG17108	2L:10692940-10694103	-	Known	YES	0.00811813	0.0778268	0.325874	0.981107	0.997476	1.50599e-05	6.54329e-05	0.678115	1.50247e-05	7.52024e-05	1.1542e-10	4.03091e-08	BOTH
FBgn0032286	CG7300	2L:10695000-10698043	-	Known	YES	0.0536264	4.52711e-06	0.000134557	0.917272	0.990291	1.77636e-15	1.77774e-14	0.963893	3.25306e-55	3.89519e-52	1.63202e-05	0.00145137	BOTH
FBgn0032297	CG17124	2L:10744075-10756325	-	Known	YES	0.0139927	0.0204164	0.136003	0.00876023	0.640933	0	0	0.75692	1.81572e-12	2.31642e-11	2.02112e-08	4.30426e-06	BOTH
FBgn0032358	Ppt2	2L:11280298-11281920	+	Known	YES	0.0817595	1.16721e-08	6.28138e-07	0.959167	0.994485	2.66454e-15	2.6143e-14	0.716804	8.37133e-13	1.11023e-11	8.88988e-06	0.000856468	BOTH
FBgn0032381	Mal-B1	2L:11847226-11849169	+	Known	YES	6.05827e-05	0.879164	1	0.0329478	0.664932	3.78909e-08	2.06833e-07	0.843807	4.61049e-23	1.84458e-21	7.63785e-07	0.000108048	BOTH
FBgn0032387	CG16965	2L:11981591-11984380	+	Known	YES	0.000856311	0.567536	0.893574	0.422619	0.890333	0	0	0.762131	1.86928e-13	2.67142e-12	6.62731e-08	1.20788e-05	BOTH
FBgn0032400	CG6770	2L:12045343-12046118	-	Known	YES	0.0131591	0.024576	0.154416	0.669247	0.952868	4.57206e-09	2.67243e-08	0.765061	2.90398e-07	1.9249e-06	3.99739e-15	2.79209e-12	BOTH
FBgn0032414	CG17211	2L:12114360-12129896	+	Known	YES	0.0057572	0.137767	0.455201	0.279569	0.83564	0.261379	0.378582	0.41327	0.12632	0.245956	3.75643e-05	0.00287538	BOTH
FBgn0032652	CG6870	2L:17591315-17592299	-	Known	YES	0.00617783	0.124151	0.429558	0.763221	0.968365	2.22045e-16	2.42491e-15	0.81748	7.12566e-14	1.06987e-12	2.38634e-12	1.11707e-09	BOTH
FBgn0032706	Irk3	2L:18711071-18713748	-	Known	YES	0.00108395	0.520071	0.862355	0.0977314	0.716789	0	0	0.834333	4.26851e-23	1.71595e-21	5.28956e-06	0.000542333	BOTH
FBgn0032726	CG10621	2L:18952206-18954431	-	Known	YES	0.0105065	0.0447122	0.229391	0.158508	0.764701	0.000149091	0.000575022	0.589904	3.92134e-08	2.95373e-07	0.000358354	0.0183708	BOTH
FBgn0032785	CG10026	2L:19454256-19457723	+	Known	YES	0.00777573	0.0844014	0.341877	0.64647	0.948403	0.0168985	0.0413258	0.685154	1.26514e-11	1.47126e-10	3.57603e-05	0.00276252	BOTH
FBgn0032809	CG13078	2L:19563930-19565158	+	Known	YES	3.22401e-05	0.911692	1	0.183685	0.780648	0.576833	0.682978	0.599894	1.40701e-06	8.38779e-06	1.0545e-05	0.000992183	BOTH
FBgn0032836	CG10680	2L:19964136-19965702	+	Known	YES	0.025099	0.00184517	0.0221864	0.0950795	0.713763	2.00412e-06	9.48195e-06	0.850388	1.61363e-29	1.21029e-27	0.0013988	0.049944	BOTH
FBgn0032839	AANATL3	2L:20024975-20025811	-	Known	YES	0.151633	2.36405e-15	4.33112e-13	0.884845	0.985855	0	0	0.818446	2.22973e-25	1.12925e-23	0.0012154	0.0450761	BOTH
FBgn0032840	sNPF	2L:20027915-20056373	+	Known	YES	0.0135985	0.0222843	0.144149	0.150467	0.759495	0.000216617	0.000816755	0.464173	0.0539828	0.11858	4.58971e-06	0.000485824	BOTH
FBgn0032896	CG14400	2L:20856987-20857891	-	Known	YES	0.014964	0.0164705	0.117192	0.942203	0.992145	2.90975e-11	1.98622e-10	0.671256	6.57589e-11	6.99682e-10	4.23803e-05	0.003193	BOTH
FBgn0032913	CG9259	2L:21089375-21090999	+	Known	YES	0.0149834	0.0164002	0.116964	0.62093	0.944438	0.0866133	0.159959	0.923041	2.01937e-39	3.68661e-37	1.31074e-05	0.00119742	BOTH
FBgn0032923	CG9248	2L:21158847-21160903	+	Known	YES	0.00555774	0.1448	0.468646	0.54529	0.929804	0.000418093	0.00150675	0.715967	0.399608	0.631637	1.3648e-23	1.83031e-20	BASELINE
FBgn0033047	CG7882	2R:1845126-1847688	+	Known	YES	0.0204322	0.00501051	0.0491334	0.104087	0.721982	0.00278788	0.00850987	0.765915	2.38485e-18	5.7689e-17	0.000130735	0.00813002	BOTH
FBgn0033065	Cyp6w1	2R:2061189-2063700	+	Known	YES	0.0297536	0.000687285	0.00994073	0.714504	0.960192	0.226376	0.339655	0.958172	7.415e-53	6.71899e-50	3.95713e-05	0.00300841	BOTH
FBgn0033097	Zip42C.2	2R:2605701-2607038	-	Known	YES	0.00420057	0.20507	0.562626	0.015836	0.640933	1.6831e-13	1.38431e-12	0.796637	8.2904e-21	2.59768e-19	7.75015e-05	0.00529205	BOTH
FBgn0033216	CG1946	2R:3602428-3604286	+	Known	YES	0.000638481	0.621576	0.925505	0.429185	0.891934	0.850825	0.896715	0.668799	9.35224e-12	1.10484e-10	0.000193674	0.0112536	BOTH
FBgn0033246	ACC	2R:3861620-3879367	-	Known	YES	0.00527008	0.155664	0.488246	0.104885	0.722409	1.8321e-05	7.89668e-05	0.507693	0.000104613	0.000445209	0.000228003	0.0129833	BOTH
FBgn0033250	CG14762	2R:3896624-3901260	-	Known	YES	0.0106417	0.0433532	0.225163	0.32391	0.85433	0.0329966	0.0727049	0.692549	3.05037e-14	4.77451e-13	0.00077774	0.0326349	BOTH
FBgn0033271	CG8708	2R:4046911-4049070	-	Known	YES	0.000485584	0.666861	0.951398	0.0821771	0.702796	0.823713	0.876904	0.765882	4.73482e-20	1.37441e-18	0.00110038	0.0421146	BOTH
FBgn0033292	Cyp4ad1	2R:4326900-4330311	-	Known	YES	0.00874421	0.0671808	0.297421	0.583448	0.938062	2.44249e-15	2.41198e-14	0.803129	4.50211e-23	1.80337e-21	0.000590574	0.0267209	BOTH
FBgn0033294	Mal-A4	2R:4346320-4348389	+	Known	YES	0.000355809	0.712527	0.977651	0.95846	0.994471	0	0	0.704614	6.26416e-11	6.68849e-10	1.30438e-06	0.000171498	BOTH
FBgn0033296	Mal-A7	2R:4356151-4359168	-	Known	YES	2.01483e-05	0.930136	1	0.885163	0.985863	0	0	0.80334	1.87212e-22	7.08427e-21	0.000271771	0.0150996	BOTH
FBgn0033297	Mal-A8	2R:4359459-4361466	+	Known	YES	0.0585002	1.62217e-06	5.32156e-05	0.202261	0.794045	0	0	0.829049	1.49925e-23	6.30683e-22	2.62184e-05	0.00217043	BOTH
FBgn0033301	CG12780	2R:4439364-4439795	-	Known	YES	0.00766845	0.0865825	0.346568	0.386688	0.879137	1.33227e-15	1.35228e-14	0.777152	2.41291e-18	5.83256e-17	3.23931e-05	0.00253157	BOTH
FBgn0033366	Ance-4	2R:4927233-4929647	-	Known	YES	0.0013305	0.476039	0.830803	0.421656	0.88973	0	0	0.707782	2.58235e-15	4.5833e-14	0.000833127	0.0343993	BOTH
FBgn0033395	Cyp4p2	2R:5125017-5127336	+	Known	YES	0.0145504	0.0180451	0.125233	0.0855694	0.707386	0.000175986	0.000672175	0.785546	1.11952e-21	3.87351e-20	0.000900601	0.0364667	BOTH
FBgn0033443	CG1698	2R:5680831-5685511	+	Known	YES	0.00345434	0.250571	0.620537	0.667466	0.952489	0.00751325	0.0205491	0.653927	2.89907e-09	2.50961e-08	1.3151e-05	0.00119813	BOTH
FBgn0033446	CG1648	2R:5698479-5707558	-	Known	YES	0.0104587	0.0452036	0.230901	0.93988	0.992025	4.11171e-11	2.77447e-10	0.781144	8.41459e-13	1.11552e-11	5.82829e-10	1.84344e-07	BOTH
FBgn0033458	CG18446	2R:5758975-5761151	+	Known	YES	0.101906	1.51888e-10	1.1982e-08	0.922033	0.990437	7.52065e-13	5.80922e-12	0.95203	3.59383e-48	1.88266e-45	3.23424e-06	0.00037135	BOTH
FBgn0033484	CG2269	2R:5972674-5983921	+	Known	YES	0.0211307	0.00431141	0.0436439	0.030261	0.664932	1.44329e-14	1.32023e-13	0.432099	0.022881	0.0559379	0.000120359	0.00758514	BOTH
FBgn0033520	Prx2540-1	2R:6311941-6312976	+	Known	YES	0.00161661	0.432076	0.795771	0.176051	0.777097	7.61724e-07	3.74449e-06	0.782265	1.38575e-21	4.73117e-20	0.00115717	0.0436405	BOTH
FBgn0033538	CG11883	2R:6505167-6529312	+	Known	YES	0.00101048	0.534573	0.87139	0.053231	0.679814	2.98445e-08	1.64194e-07	0.723066	6.97982e-15	1.16773e-13	0.000112813	0.00720435	BOTH
FBgn0033593	Listericin	2R:7129250-7129699	-	Known	YES	0.0185985	0.00744575	0.0660582	0.432224	0.892177	3.39042e-05	0.000141829	0.801872	1.01421e-18	2.5528e-17	1.50157e-06	0.000196652	BOTH
FBgn0033659	Damm	2R:7752681-7753888	-	Known	YES	0.0301983	0.000625598	0.00923576	0.257767	0.825964	0.245667	0.361073	0.652254	2.35146e-07	1.58343e-06	3.4337e-07	5.23281e-05	BOTH
FBgn0033674	CG8964	2R:7910651-7912777	-	Known	YES	0.00237289	0.341089	0.717062	0.285944	0.838383	0.04108	0.0873928	0.953581	4.94276e-45	1.91096e-42	7.26067e-09	1.72575e-06	BOTH
FBgn0033698	CG8858	2R:8079879-8086359	-	Known	YES	4.80501e-05	0.8923	1	0.887788	0.985863	4.03267e-10	2.53867e-09	0.43452	0.00693412	0.0192754	0.00038211	0.0191209	BASELINE
FBgn0033733	CG8834	2R:8307316-8310040	-	Known	YES	0.000557034	0.644762	0.939134	0.711211	0.959433	0.0107914	0.0281468	0.776593	6.34448e-15	1.06515e-13	1.13001e-07	1.95288e-05	BOTH
FBgn0033760	CG8785	2R:8528195-8535729	-	Known	YES	0.0110291	0.0396923	0.212582	0.648579	0.948861	6.0052e-13	4.69052e-12	0.595286	5.83155e-09	4.84186e-08	0.000849453	0.0349359	BOTH
FBgn0033774	CG12374	2R:8649618-8651330	+	Known	YES	0.00268215	0.311427	0.688189	0.962587	0.994968	0	0	0.794401	1.32792e-09	1.2036e-08	6.18119e-15	3.91013e-12	BOTH
FBgn0033788	CG13323	2R:8932200-8934761	-	Known	YES	0.011881	0.0327317	0.187494	0.673974	0.953166	2.33147e-14	2.09889e-13	0.808775	4.61633e-12	5.62193e-11	1.90973e-13	1.00043e-10	BOTH
FBgn0033789	CG13324	2R:8936651-8937161	-	Known	YES	6.72296e-05	0.872761	1	0.334898	0.859692	0	0	0.831188	5.51878e-13	7.46683e-12	4.83415e-15	3.24149e-12	BOTH
FBgn0033792	CG13325	2R:8998274-9013519	+	Known	YES	0.020761	0.00466812	0.0464554	0.724694	0.962117	5.82617e-09	3.38364e-08	0.693359	1.02057e-13	1.50469e-12	0.000366162	0.0186005	BOTH
FBgn0033821	CG10799	2R:9145391-9145982	+	Known	YES	0.00073433	0.596537	0.910131	0.854614	0.982679	0.683108	0.76953	0.890791	8.15156e-35	9.93808e-33	0.000358177	0.0183708	BOTH
FBgn0033826	CG4734	2R:9184707-9185972	-	Known	YES	0.00148325	0.451741	0.812741	0.962093	0.994968	3.26406e-14	2.89336e-13	0.938946	1.16521e-24	5.48972e-23	1.07276e-24	1.71268e-21	BOTH
FBgn0033887	St4	2R:9857415-9858768	-	Known	YES	0.115864	7.17015e-12	7.32908e-10	0.67868	0.953312	0.122453	0.21049	0.488327	0.000264055	0.0010256	0.000341725	0.017822	BOTH
FBgn0033904	CG18327	2R:10054487-10055738	+	Known	YES	0.0723563	8.65442e-08	3.84823e-06	0.420307	0.889163	6.6791e-13	5.19148e-12	0.792192	9.59212e-20	2.68668e-18	3.22641e-05	0.00252738	BOTH
FBgn0033926	Arc1	2R:10245432-10247802	-	Known	YES	0.073826	6.33306e-08	2.88098e-06	0.710504	0.959433	0.51523	0.629316	0.905733	6.43122e-38	1.01707e-35	0.00038125	0.0191209	BOTH
FBgn0033958	jef	2R:10626864-10632840	-	Known	YES	0.00369683	0.234566	0.60109	0.106383	0.722409	2.22833e-07	1.14829e-06	0.454968	0.0648884	0.139082	6.68286e-06	0.000662888	BOTH
FBgn0033978	Cyp6a23	2R:10763334-10765159	+	Known	YES	0.0356707	0.00019725	0.00353459	0.604675	0.94253	3.33067e-15	3.22912e-14	0.958558	6.85049e-48	3.42801e-45	1.82203e-08	3.94111e-06	BOTH
FBgn0033981	Cyp6a21	2R:10772769-10774452	-	Known	YES	0.00865313	0.0686277	0.301636	0.998973	0.999762	0.000131599	0.000511147	0.902253	1.09384e-33	1.24739e-31	4.13228e-06	0.000449815	BOTH
FBgn0033999	CG8093	2R:11101565-11103191	-	Known	YES	0.000184691	0.790659	1	0.727625	0.962316	0	0	0.797061	8.38873e-10	7.81464e-09	5.766e-15	3.71763e-12	BOTH
FBgn0034013	unc-5	2R:11227977-11255805	+	Known	YES	0.0022075	0.358513	0.733829	0.83581	0.979167	1.11022e-15	1.13688e-14	0.597944	2.42912e-09	2.12142e-08	0.00121211	0.0450235	BOTH
FBgn0034030	CG8192	2R:11431821-11437489	-	Known	YES	0.0122074	0.0304131	0.178075	0.265043	0.829235	0.649459	0.742454	0.34769	0.124139	0.242349	0.00133744	0.0481636	ETOH
FBgn0034046	tun	2R:11681505-11743150	+	Known	YES	0.000523186	0.655005	0.944653	0.0472397	0.679301	1.11492e-08	6.32494e-08	0.379894	0.0450077	0.101117	0.00093738	0.037503	BOTH
FBgn0034052	CG8299	2R:11828115-11828988	-	Known	YES	0.0557815	2.8763e-06	8.95391e-05	0.0878853	0.710161	3.66917e-06	1.69179e-05	0.880446	3.39601e-29	2.4698e-27	2.37148e-06	0.00028695	BOTH
FBgn0034085	Ptp52F	2R:12058617-12065812	-	Known	YES	0.00192506	0.391229	0.76221	0.433346	0.892688	0.026284	0.0601198	0.625887	9.6126e-11	1.00368e-09	0.00124522	0.0457768	BOTH
FBgn0034143	CG8303	2R:12482533-12491878	-	Known	YES	0.00188079	0.396736	0.766373	0.120836	0.737021	0.698047	0.781056	0.543179	1.11387e-06	6.75432e-06	0.000771904	0.032553	BOTH
FBgn0034160	CG5550	2R:12704094-12705082	+	Known	YES	0.0202351	0.00522785	0.050628	0.301465	0.845307	0.133037	0.224707	0.700768	4.77901e-15	8.17897e-14	0.00107766	0.0414935	BOTH
FBgn0034191	CG6984	2R:12979489-12980575	+	Known	YES	0.0160236	0.0130486	0.0994726	0.205926	0.797355	1.34258e-10	8.71885e-10	0.674418	2.96985e-06	1.68477e-05	1.49181e-09	4.31172e-07	BOTH
FBgn0034197	Cda9	2R:13015985-13017839	+	Known	YES	0.0214689	0.00400928	0.0412202	0.414287	0.886352	0.959615	0.973381	0.701889	3.19291e-14	4.98365e-13	0.000340532	0.0178113	BOTH
FBgn0034276	Sardh	2R:13641060-13643927	-	Known	YES	0.015441	0.0148285	0.108832	0.740135	0.964028	4.10783e-15	3.94606e-14	0.648483	1.94947e-09	1.72636e-08	2.94165e-05	0.00235381	BOTH
FBgn0034289	CG10910	2R:13907773-13909911	+	Known	YES	0.0106069	0.0436986	0.226198	0.47565	0.907173	0.00215169	0.00673702	0.800365	2.46596e-13	3.46506e-12	3.75371e-11	1.46338e-08	BOTH
FBgn0034291	CG5770	2R:13931551-13932578	-	Known	YES	0.0536509	4.50388e-06	0.000134104	0.895057	0.987109	0.000352868	0.00128832	0.758543	2.76406e-13	3.86288e-12	8.29745e-08	1.49069e-05	BOTH
FBgn0034292	CG5767	2R:13933891-13934989	-	Known	YES	0.00882746	0.0658866	0.294109	0.857941	0.983074	3.24185e-14	2.87444e-13	0.840786	9.4796e-07	5.80392e-06	4.03124e-26	7.50863e-23	BOTH
FBgn0034293	CG14495	2R:13936309-13937427	-	Known	YES	0.0244166	0.002134	0.0250601	0.916659	0.990291	6.05239e-09	3.50712e-08	0.662325	1.76505e-07	1.21065e-06	1.46755e-07	2.41973e-05	BOTH
FBgn0034295	CG10911	2R:13940055-13941571	-	Known	YES	0.0350048	0.00022694	0.00397604	0.576608	0.936742	6.54352e-06	2.9434e-05	0.653181	1.76071e-10	1.78127e-09	0.000107288	0.00693075	BOTH
FBgn0034296	CG10912	2R:13943569-13944570	-	Known	YES	0.0079455	0.08107	0.334092	0.805027	0.974057	7.66667e-11	5.06562e-10	0.773547	1.61309e-10	1.63934e-09	9.76855e-12	4.3668e-09	BOTH
FBgn0034317	CG14499	2R:14075227-14075794	+	Known	YES	0.155832	9.04172e-16	1.76245e-13	0.0283326	0.660983	1.28894e-09	7.83323e-09	0.760268	1.61355e-19	4.40892e-18	0.00104183	0.0404745	BOTH
FBgn0034318	CG14500	2R:14076483-14077159	+	Known	YES	0.063481	5.67078e-07	2.09388e-05	0.724267	0.961863	0.343899	0.46483	0.919581	2.56555e-14	4.04397e-13	1.10933e-32	4.13251e-29	BOTH
FBgn0034356	CG10924	2R:14414935-14423254	+	Known	YES	0.0911583	1.55364e-09	1.02336e-07	0.524078	0.923028	0.00504807	0.0144831	0.914617	3.83923e-40	7.63639e-38	0.000462696	0.0222885	BOTH
FBgn0034381	List	2R:14615322-14617786	-	Known	YES	0.0218407	0.00370176	0.0388448	0.616944	0.944352	1.74141e-10	1.12197e-09	0.714574	7.93483e-15	1.32288e-13	0.000240162	0.0135554	BOTH
FBgn0034440	CG10073	2R:15268048-15272470	+	Known	YES	0.0115836	0.0350045	0.196122	0.152519	0.76086	0.000613713	0.00214799	0.67686	9.47147e-13	1.24725e-11	0.000399677	0.0197058	BOTH
FBgn0034471	Obp56e	2R:15599850-15600437	+	Known	YES	0.17922	3.94682e-18	9.80186e-16	0.447491	0.897994	0.00293751	0.00892517	0.749656	2.86744e-09	2.48287e-08	3.69979e-11	1.45933e-08	BOTH
FBgn0034479	CG8654	2R:15866747-15872400	+	Known	YES	0.00037769	0.704223	0.973964	0.151207	0.759899	0	0	0.79553	1.07907e-17	2.43952e-16	7.56113e-07	0.000107972	BOTH
FBgn0034480	CG16898	2R:15891125-15892508	-	Known	YES	6.98106e-05	0.870362	1	0.107782	0.72385	0.909019	0.937742	0.890803	5.48593e-36	7.35707e-34	0.00129565	0.0471094	BOTH
FBgn0034499	Cpr56F	2R:16175876-16179450	-	Known	YES	0.00320322	0.268579	0.642425	0.620835	0.944438	0.86787	0.908823	0.426215	0.00749282	0.0206436	0.000556405	0.0255542	BOTH
FBgn0034507	CG11192	2R:16241613-16242572	-	Known	YES	0.0464658	2.03968e-05	0.000506925	0.975645	0.996774	0.113546	0.198332	0.529888	4.94184e-06	2.69363e-05	0.000612142	0.0275851	BOTH
FBgn0034512	CG18067	2R:16421750-16423340	+	Known	YES	0.00158131	0.437151	0.799715	0.628367	0.945819	2.84067e-07	1.45112e-06	0.593481	4.77342e-09	4.01602e-08	0.0010792	0.0414935	BOTH
FBgn0034540	Lrt	2R:16533865-16548575	+	Known	YES	0.000780974	0.585102	0.904523	0.224163	0.80891	1.13245e-08	6.42109e-08	0.602985	4.604e-07	2.96216e-06	2.0985e-05	0.00178644	BOTH
FBgn0034553	CG9993	2R:16737651-16739630	-	Known	YES	0.134281	1.1984e-13	1.69531e-11	0.31462	0.850706	0.000917006	0.00311108	0.706915	1.78906e-13	2.56442e-12	7.35107e-05	0.00507118	BOTH
FBgn0034564	CG9344	2R:16864561-16865105	+	Known	YES	0.383273	5.30726e-42	7.41402e-39	0.00577728	0.616443	1.03432e-06	5.03214e-06	0.496512	3.38805e-05	0.000158669	0.00106006	0.0410216	BOTH
FBgn0034663	CG4363	2R:17721735-17722552	-	Known	YES	0.0645211	4.55174e-07	1.71854e-05	0.607682	0.942662	0	0	0.757862	1.89102e-13	2.70017e-12	1.27417e-07	2.13714e-05	BOTH
FBgn0034664	CG4377	2R:17722953-17723862	-	Known	YES	0.000389058	0.700017	0.97186	0.298641	0.844234	0	0	0.810006	5.97076e-17	1.25742e-15	1.32969e-08	3.01219e-06	BOTH
FBgn0034711	CG3290	2R:18093510-18095492	-	Known	YES	0.0211009	0.00433912	0.0439022	0.252473	0.823558	6.66134e-16	6.94437e-15	0.752668	1.17369e-17	2.64451e-16	0.00022809	0.0129833	BOTH
FBgn0034712	CG3264	2R:18095969-18098270	-	Known	YES	0.0010208	0.532491	0.870614	0.308122	0.847953	4.99478e-11	3.34275e-10	0.585575	1.95128e-05	9.57279e-05	3.19682e-06	0.000368316	BOTH
FBgn0034723	CG13506	2R:18270639-18281520	+	Known	YES	0.00284578	0.297089	0.674067	0.88801	0.985863	7.24366e-09	4.17217e-08	0.761594	2.94432e-17	6.41836e-16	4.74689e-05	0.00350548	BOTH
FBgn0034741	CG4269	2R:18484750-18488200	+	Known	YES	0.0094583	0.0568998	0.268008	0.304574	0.846519	0.00958392	0.0253945	0.722948	6.92156e-13	9.24538e-12	5.01113e-06	0.000520149	BOTH
FBgn0034928	CG13562	2R:19791273-19792792	+	Known	YES	0.00101916	0.532821	0.870853	0.886334	0.985863	0.0103395	0.0271217	0.39795	0.0157401	0.0401001	0.00114952	0.0434496	BOTH
FBgn0034950	Pask	2R:19876261-19879572	+	Known	YES	0.00231666	0.346881	0.723342	0.402232	0.881742	9.67014e-09	5.51292e-08	0.415166	0.00621329	0.0174935	0.00117636	0.0441656	BOTH
FBgn0034997	CG3376	2R:20145536-20152736	+	Known	YES	0.00812504	0.0776998	0.325589	0.120757	0.736936	0	0	0.822595	2.40375e-23	9.85215e-22	5.60796e-05	0.00403472	BOTH
FBgn0034999	CG3394	2R:20181620-20185634	+	Known	YES	0.000843777	0.570386	0.895073	0.0654912	0.687533	1.0673e-07	5.65024e-07	0.844804	1.21982e-20	3.77627e-19	7.89839e-09	1.85181e-06	BOTH
FBgn0035006	CG4563	2R:20338607-20340563	-	Known	YES	0.10033	2.13899e-10	1.63731e-08	0.679041	0.953446	0.0499959	0.102694	0.791803	7.0123e-19	1.7933e-17	9.42858e-06	0.000903177	BOTH
FBgn0035040	CG4741	2R:20498324-20502681	-	Known	YES	0.0156154	0.0142711	0.105832	0.755885	0.966948	1.24998e-09	7.6033e-09	0.570783	0.00408761	0.0120131	2.24918e-08	4.71302e-06	BOTH
FBgn0035092	Nplp1	2R:20919900-20927900	+	Known	YES	0.00126154	0.487706	0.83896	0.470925	0.905103	0	0	0.403299	0.0140474	0.0362554	0.000985306	0.0388183	BOTH
FBgn0035094	CG9380	2R:21071151-21142841	-	Known	YES	0.0110044	0.0399156	0.213369	0.0393036	0.671288	0.000160735	0.000616962	0.673155	9.41483e-13	1.24028e-11	0.000542347	0.0250803	BOTH
FBgn0035097	CG13405	3L:73945-75332	-	Known	YES	0.0743533	5.66139e-08	2.60013e-06	0.920238	0.990437	0.897225	0.929478	0.680977	2.0215e-12	2.56431e-11	0.000177247	0.0104623	BOTH
FBgn0035154	CG3344	3L:685942-687958	-	Known	YES	0.0375104	0.000133934	0.00253266	0.878768	0.98537	0	0	0.713457	4.72721e-16	9.10856e-15	0.00126202	0.0461415	BOTH
FBgn0035158	CG13895	3L:705948-708205	-	Known	YES	3.27528e-05	0.910996	1	0.640951	0.947423	5.22496e-08	2.82497e-07	0.829826	3.94065e-26	2.19102e-24	0.000629882	0.0279583	BOTH
FBgn0035171	CG12502	3L:865396-871701	+	Known	YES	0.0374129	0.000136711	0.00258226	0.892347	0.986213	2.40509e-09	1.43127e-08	0.34538	0.227694	0.402123	0.00065621	0.0285756	BASELINE
FBgn0035227	Iml1	3L:1523414-1534034	-	Known	YES	0.00437893	0.195692	0.549934	0.407891	0.884502	0.00232784	0.00723077	0.825603	7.27108e-21	2.30196e-19	7.77448e-07	0.000109061	BOTH
FBgn0035231	Pcyt2	3L:1553493-1555315	+	Known	YES	0.000904214	0.556892	0.886685	0.841846	0.980757	0.0132297	0.0334848	0.522272	6.40639e-06	3.42072e-05	0.000801365	0.0334171	BOTH
FBgn0035282	CNMa	3L:1850915-1855591	-	Known	YES	0.0156406	0.0141924	0.105365	0.140954	0.752083	0	0	0.719809	2.153e-09	1.89061e-08	6.8294e-09	1.6355e-06	BOTH
FBgn0035290	dsb	3L:1893408-1910197	-	Known	YES	0.00207141	0.373779	0.747892	0.20708	0.7984	0.344684	0.465617	0.68367	9.67616e-14	1.43102e-12	0.00084533	0.0348602	BOTH
FBgn0035293	CG5687	3L:1933633-1939103	-	Known	YES	0.0472116	1.74387e-05	0.000443265	0.862781	0.983664	0	0	0.811899	1.20983e-21	4.15741e-20	2.74634e-05	0.00225678	BOTH
FBgn0035313	CG13810	3L:2185930-2187676	+	Known	YES	0.00389765	0.222238	0.586095	0.111592	0.726351	0.920095	0.945803	0.400135	0.0719137	0.15204	0.000183316	0.0107636	BOTH
FBgn0035323	CG13807	3L:2262919-2263615	+	Known	YES	0.00362634	0.239088	0.606622	0.178639	0.779239	0.655197	0.746975	0.286895	1	1	0.000463989	0.0223187	ETOH
FBgn0035348	CG16758	3L:2499372-2503606	-	Known	YES	0.00333644	0.258834	0.630023	0.810665	0.974625	0.000276686	0.0010273	0.607666	1.21094e-06	7.30333e-06	6.10808e-06	0.00060948	BOTH
FBgn0035355	CG16985	3L:2599297-2600242	+	Known	YES	0.0678207	2.26455e-07	9.24771e-06	0.0791001	0.700819	2.22045e-16	2.42491e-15	0.626818	1.8221e-08	1.42967e-07	3.64247e-05	0.00279453	BOTH
FBgn0035356	CG16986	3L:2600331-2601536	+	Known	YES	0.00124765	0.490115	0.840644	0.476447	0.907173	0	0	0.559213	1.44012e-07	9.99643e-07	0.0011171	0.0425601	BOTH
FBgn0035409	CG14963	3L:3171614-3172545	-	Known	YES	0.0285796	0.000881153	0.0122076	0.965246	0.995268	0.00561787	0.0159432	0.83046	4.23542e-26	2.34325e-24	0.000555852	0.0255542	BOTH
FBgn0035434	Drsl5	3L:3316781-3317144	+	Known	YES	0.00772507	0.0854239	0.344273	0.522874	0.922613	0.12258	0.210615	0.734578	2.06277e-16	4.12887e-15	0.000287167	0.0157318	BOTH
FBgn0035484	CG11594	3L:4022974-4026011	-	Known	YES	0.00226812	0.35199	0.7281	0.513676	0.920185	0	0	0.516221	3.94985e-05	0.00018291	0.00029604	0.0160864	BOTH
FBgn0035533	Cip4	3L:4322491-4364102	-	Known	YES	0.00250729	0.327758	0.704212	0.154545	0.761659	3.26721e-05	0.00013688	0.672966	4.63384e-13	6.31796e-12	0.000823921	0.0341032	BOTH
FBgn0035539	slow	3L:4384442-4403181	+	Known	YES	0.0153023	0.0152879	0.111232	0.761699	0.96799	8.56881e-05	0.000340881	0.751699	2.14399e-16	4.27612e-15	4.39905e-05	0.00329948	BOTH
FBgn0035569	CG15876	3L:4694205-4694845	-	Known	YES	0.00287703	0.294448	0.670883	0.436472	0.893534	0.76958	0.835923	0.260828	1	1	0.00101527	0.0398115	BASELINE
FBgn0035582	CG13705	3L:4896864-4898470	+	Known	YES	0.00830338	0.0745004	0.317218	0.593126	0.940476	0.499582	0.615067	0.597998	6.80071e-08	4.95884e-07	0.000136401	0.00837569	BOTH
FBgn0035619	CG10592	3L:5585841-5588372	-	Known	YES	0.00971285	0.0536495	0.258324	0.183111	0.780318	1.13646e-09	6.9342e-09	0.822462	3.16075e-22	1.16965e-20	1.17144e-05	0.00108111	BOTH
FBgn0035620	CG5150	3L:5588642-5590522	+	Known	YES	2.65127e-06	0.974629	1	0.136505	0.749848	1.61021e-08	9.03982e-08	0.759317	1.35724e-18	3.3657e-17	0.000374907	0.01893	BOTH
FBgn0035661	CG10477	3L:6026299-6027711	-	Known	YES	0.000345203	0.716658	0.979878	0.485141	0.911282	3.50396e-08	1.91705e-07	0.91836	1.06343e-33	1.21684e-31	1.0523e-08	2.43314e-06	BOTH
FBgn0035666	Jon65Aii	3L:6045421-6046315	+	Known	YES	0.0276065	0.00108299	0.0145645	0.897256	0.987503	0	0	0.966854	4.22673e-58	7.87276e-55	6.76933e-05	0.00472824	BOTH
FBgn0035667	Jon65Ai	3L:6046593-6047543	-	Known	YES	0.00911811	0.0615722	0.282084	0.0245562	0.655419	3.13527e-13	2.51813e-12	0.712413	3.80269e-14	5.89971e-13	0.00011424	0.00728161	BOTH
FBgn0035695	CG10226	3L:6227423-6233168	-	Known	YES	0.0148736	0.0168021	0.11892	0.297539	0.843929	0.872618	0.912337	0.645726	4.28308e-11	4.66079e-10	0.000481919	0.0228857	BOTH
FBgn0035703	CG8270	3L:6481781-6484310	+	Known	YES	0.052817	5.36747e-06	0.000157029	0.362188	0.870219	6.66134e-16	6.94437e-15	0.511312	2.70858e-05	0.000129543	0.000534752	0.0248663	BOTH
FBgn0035719	tow	3L:6935956-6942413	+	Known	YES	2.30456e-07	0.992519	1	0.703875	0.958172	0.000234006	0.000877976	0.387082	0.0503344	0.111567	0.000574925	0.0261186	BOTH
FBgn0035743	CG15829	3L:7122003-7122773	+	Known	YES	0.015431	0.0148612	0.108931	0.939958	0.992025	9.59057e-11	6.29283e-10	0.746266	2.32907e-07	1.5699e-06	2.93611e-13	1.4915e-10	BOTH
FBgn0035779	CG8562	3L:7391385-7393012	+	Known	YES	0.068218	2.08177e-07	8.56385e-06	0.638161	0.947423	0	0	0.840731	1.9553e-21	6.60174e-20	9.0886e-08	1.59536e-05	BOTH
FBgn0035781	CG8560	3L:7395432-7397281	-	Known	YES	0.00290834	0.291832	0.667868	0.0311382	0.664932	0	0	0.850658	4.40277e-10	4.25394e-09	4.22758e-22	4.7246e-19	BOTH
FBgn0035791	CG8539	3L:7490311-7491931	-	Known	YES	0.284182	1.40708e-29	1.02554e-26	0.365373	0.871333	7.60933e-09	4.37827e-08	0.777623	1.22423e-20	3.78642e-19	0.000637345	0.0281161	BOTH
FBgn0035806	PGRP-SD	3L:7644280-7645000	+	Known	YES	0.00123475	0.492368	0.842503	0.668417	0.952651	1.17992e-07	6.21992e-07	0.787875	1.56335e-15	2.84244e-14	5.35175e-08	1.00239e-05	BOTH
FBgn0035917	Zasp66	3L:8617471-8631913	+	Known	YES	0.014154	0.0196995	0.132623	0.0401854	0.671288	0.118496	0.205321	0.516037	6.10413e-06	3.26974e-05	0.00118628	0.0443394	BOTH
FBgn0035933	CG13309	3L:8803495-8804365	+	Known	YES	0.0383061	0.000113297	0.00220856	0.830467	0.978305	0.0154056	0.0381735	0.881849	5.89209e-27	3.44754e-25	3.97837e-08	7.74705e-06	BOTH
FBgn0035976	PGRP-LC	3L:9331910-9341436	+	Known	YES	0.0182801	0.00797807	0.0696912	0.457756	0.902646	0.000986978	0.00332258	0.791499	2.63296e-19	7.03949e-18	1.87437e-05	0.00163226	BOTH
FBgn0035977	PGRP-LF	3L:9342709-9344589	+	Known	YES	0.00712629	0.0985768	0.375268	0.581485	0.938062	4.72006e-07	2.36398e-06	0.666366	1.95215e-10	1.96369e-09	3.08158e-05	0.0024367	BOTH
FBgn0035982	CG4461	3L:9368530-9369393	+	Known	YES	0.00201126	0.380815	0.753917	0.134288	0.748958	3.37073e-11	2.28938e-10	0.710833	2.41992e-15	4.30412e-14	0.000663233	0.0288408	BOTH
FBgn0035985	Cpr67B	3L:9397897-9399274	+	Known	YES	0.000261933	0.751901	0.997309	0.71076	0.959433	1.33227e-15	1.35228e-14	0.820512	6.48082e-25	3.15359e-23	0.00055002	0.0253652	BOTH
FBgn0036008	CG3408	3L:9499918-9502683	-	Known	YES	5.06302e-06	0.964945	1	0.0425683	0.672871	0	0	0.462858	0.00391374	0.0115548	0.000130798	0.00813002	BOTH
FBgn0036015	CG3088	3L:9593590-9594425	-	Known	YES	2.52204e-06	0.975255	1	0.00361637	0.591391	3.10862e-15	3.0305e-14	0.637815	7.14532e-09	5.8716e-08	2.86419e-05	0.00229732	BOTH
FBgn0036024	CG18180	3L:9634113-9635013	+	Known	YES	0.0241638	0.00225221	0.0261914	0.0855353	0.707386	0.0112486	0.0291442	0.818312	1.26249e-21	4.32798e-20	9.58026e-06	0.000909907	BOTH
FBgn0036104	CG6418	3L:10869415-10872137	-	Known	YES	0.0455487	2.47309e-05	0.000599967	0.411046	0.885442	3.64153e-14	3.20677e-13	0.529348	5.69018e-06	3.06465e-05	0.000571655	0.0260406	BOTH
FBgn0036109	Cpr67Fa2	3L:10884814-10885616	+	Known	YES	0.000154532	0.80815	1	0.649791	0.949115	0.733315	0.808932	0.451329	0.000765891	0.00267007	0.00111416	0.0424966	BOTH
FBgn0036229	CG7248	3L:11947183-11949880	+	Known	RARE	0.00123854	0.491704	0.841777	0.225457	0.810415	0.0464093	0.0964922	0.465402	0.0033105	0.00993565	0.000132757	0.0082209	BOTH
FBgn0036262	CG6910	3L:12178084-12180960	+	Known	YES	1.8449e-05	0.93314	1	0.373376	0.874328	0	0	0.830352	1.23113e-23	5.26483e-22	2.37487e-05	0.00198065	BOTH
FBgn0036289	CG10657	3L:12484930-12490316	-	Known	YES	0.0175278	0.00939485	0.0786863	0.292241	0.841849	5.44009e-15	5.17102e-14	0.471493	0.00018348	0.000740433	0.00118044	0.0442594	BOTH
FBgn0036320	CG10943	3L:12854817-12856020	-	Known	YES	0.0566184	2.41151e-06	7.62743e-05	0.339502	0.862156	0	0	0.810126	1.13681e-23	4.87388e-22	0.000496869	0.0234383	BOTH
FBgn0036359	CG14105	3L:13418991-13419773	-	Known	YES	0.0130364	0.025258	0.157344	0.78232	0.970529	0.326085	0.446741	0.853267	3.27087e-12	4.05107e-11	2.27735e-19	2.31372e-16	BOTH
FBgn0036381	CG8745	3L:13853127-13860005	-	Known	YES	0.0114842	0.0358001	0.198984	0.734934	0.96379	0	0	0.682033	4.92544e-10	4.72625e-09	3.13102e-06	0.00036323	BOTH
FBgn0036419	CG13482	3L:14322446-14322985	+	Known	YES	0.0674056	2.47261e-07	9.98787e-06	0.532474	0.925939	0.0628841	0.123614	0.609084	2.84703e-08	2.18577e-07	0.000110141	0.00708771	BOTH
FBgn0036422	CG3868	3L:14393869-14395825	-	Known	YES	0.00190486	0.393728	0.763984	0.472487	0.905824	0.706669	0.788019	0.741883	3.98684e-17	8.53011e-16	0.00035014	0.0180602	BOTH
FBgn0036449	bmm	3L:14769596-14779512	-	Known	YES	0.00238248	0.340114	0.716179	0.850128	0.981868	0	0	0.584525	2.37489e-05	0.000114946	2.88745e-06	0.000337309	BOTH
FBgn0036469	CG18649	3L:15046668-15047235	-	Known	YES	0.0136993	0.0217907	0.142385	0.865171	0.983665	0.547264	0.6566	0.511593	3.55737e-05	0.000166111	0.000426888	0.0208027	BOTH
FBgn0036494	Toll-6	3L:15329792-15337415	+	Known	YES	0.000454498	0.677081	0.957551	0.199258	0.790387	9.18443e-12	6.52311e-11	0.432386	0.0103636	0.0276223	0.000285596	0.015697	BOTH
FBgn0036550	CG17026	3L:15968468-15969528	+	Known	YES	0.0824259	1.01218e-08	5.53593e-07	0.478323	0.907563	0.397693	0.518904	0.592167	3.63614e-09	3.10834e-08	0.00137984	0.0494252	BOTH
FBgn0036563	CG13075	3L:16077093-16078364	+	Known	YES	0.00357646	0.242351	0.611106	0.082282	0.702796	0.267466	0.385184	0.50102	0.000108229	0.000459026	0.000334316	0.0175683	BOTH
FBgn0036715	Cad74A	3L:17360853-17372630	-	Known	YES	0.00397338	0.217791	0.58016	0.724838	0.96214	1.76897e-07	9.19633e-07	0.413849	0.0157934	0.0402269	0.000507376	0.0237913	BOTH
FBgn0036738	CG7542	3L:17542926-17544080	+	Known	YES	0.00452204	0.188529	0.539982	0.821197	0.976891	0.00043466	0.00156176	0.962408	6.97028e-57	9.73719e-54	0.000343701	0.0178636	BOTH
FBgn0036766	CG5506	3L:17876749-17877476	-	Known	YES	0.0299788	0.000655309	0.00959831	0.547193	0.930305	3.2512e-06	1.50507e-05	0.717151	2.63713e-16	5.21623e-15	0.00124842	0.0458443	BOTH
FBgn0036821	CG3961	3L:18871350-18883583	-	Known	YES	0.00451789	0.188733	0.540172	0.19111	0.78666	1.31919e-09	8.00689e-09	0.813485	2.27492e-22	8.50292e-21	5.94814e-05	0.00421613	BOTH
FBgn0036862	Gbs-76A	3L:19274464-19285866	-	Known	YES	0.00825719	0.0753153	0.319365	0.103838	0.721982	0.0353389	0.0770253	0.548294	2.43515e-06	1.40208e-05	0.000322287	0.0170431	BOTH
FBgn0036873	CG18294	3L:19468117-19468678	-	Known	RARE	0.000645316	0.619715	0.924623	0.635794	0.946814	0.863514	0.905531	0.230698	1	1	0.00125893	0.0460787	ETOH
FBgn0036875	CG9449	3L:19485153-19490823	-	Known	YES	0.00833283	0.0739859	0.315789	0.159692	0.765445	3.10874e-05	0.000130551	0.795115	4.46964e-22	1.61133e-20	0.000477985	0.022747	BOTH
FBgn0036876	CG9451	3L:19491297-19493898	-	Known	YES	0.000808872	0.578473	0.899933	0.343301	0.863763	0.0526358	0.107047	0.818475	1.31341e-18	3.26909e-17	5.83977e-08	1.08171e-05	BOTH
FBgn0036948	CG7298	3L:20195170-20196787	-	Known	YES	0.00342549	0.252563	0.623231	0.104785	0.722409	7.85921e-08	4.20177e-07	0.827999	7.43247e-11	7.86828e-10	2.16582e-17	1.86188e-14	BOTH
FBgn0036996	mag	3L:20453783-20455374	+	Known	YES	0.00306	0.279569	0.655372	0.305486	0.847262	2.41949e-06	1.13605e-05	0.899986	9.67601e-26	5.11684e-24	4.47888e-12	2.02924e-09	BOTH
FBgn0037130	Syn1	3L:21738459-21763634	-	Known	YES	0.00211552	0.368734	0.744095	0.720807	0.961395	1.07394e-09	6.56708e-09	0.804701	1.25235e-23	5.34872e-22	0.000927356	0.0372273	BOTH
FBgn0037204	CG11131	3L:22891844-22893362	+	Known	YES	0.00992073	0.0511405	0.250195	0.856484	0.982903	0.966188	0.977579	0.480441	0.00189503	0.00602453	9.0939e-05	0.00601363	BOTH
FBgn0037205	BoYb	3L:22895012-22898570	+	Known	YES	0.0153111	0.0152584	0.11109	0.506268	0.917386	9.65994e-12	6.84777e-11	0.69257	4.03663e-06	2.24067e-05	7.53304e-11	2.78706e-08	BOTH
FBgn0037228	CG1092	3R:92492-94038	+	Known	YES	0.0116006	0.0348703	0.195698	0.0384715	0.670318	0.000323645	0.00118887	0.68822	2.63428e-14	4.14451e-13	0.00119226	0.0444636	BOTH
FBgn0037443	Dmtn	3R:2214884-2231617	-	Known	YES	0.00583128	0.135253	0.450536	0.0353267	0.666368	0.01996	0.0476584	0.595517	4.02726e-05	0.000186211	6.11003e-07	9.02428e-05	BOTH
FBgn0037485	CG14606	3R:3040061-3042805	-	Known	YES	0.00346018	0.250171	0.62018	0.501249	0.916188	0.00150478	0.0048842	0.767641	5.89987e-17	1.24328e-15	1.4082e-05	0.00127258	BOTH
FBgn0037531	CG10445	3R:3742321-3746021	-	Known	YES	2.00555e-08	0.997793	1	0.657356	0.951133	0	0	0.562462	1.0677e-06	6.49668e-06	0.000230449	0.0130954	BOTH
FBgn0037562	CG11671	3R:4113598-4114335	+	Known	YES	0.00948079	0.0566043	0.267443	0.736197	0.963842	7.83144e-07	3.84471e-06	0.813546	4.80143e-12	5.83463e-11	5.2294e-14	2.9221e-11	BOTH
FBgn0037580	DppIII	3R:4170122-4173187	+	Known	YES	0.00561251	0.14283	0.465178	0.973554	0.996651	4.12142e-07	2.07626e-06	0.62274	0.00113071	0.00379034	4.43866e-10	1.44481e-07	BASELINE
FBgn0037635	CG9837	3R:4633401-4639301	-	Known	YES	0.00195425	0.387657	0.759296	0.514893	0.920575	0.114877	0.200209	0.668043	5.08051e-13	6.90731e-12	0.00114058	0.0433073	BOTH
FBgn0037684	CG8129	3R:5191120-5193485	+	Known	YES	0.00800694	0.0798993	0.331041	0.252933	0.823558	7.10543e-15	6.67822e-14	0.746057	1.68872e-15	3.05891e-14	2.23167e-05	0.00187993	BOTH
FBgn0037724	Fst	3R:5470700-5471876	-	Known	YES	0.000599964	0.6323	0.932198	0.134229	0.748958	0.00082057	0.0028095	0.739047	3.11926e-13	4.33579e-12	1.22773e-06	0.000163342	BOTH
FBgn0037762	eloF	3R:5639883-5640880	+	Known	YES	0.00356058	0.243401	0.612143	0.840714	0.980372	8.51584e-06	3.78989e-05	0.707633	1.80233e-13	2.58013e-12	6.81067e-05	0.00473737	BOTH
FBgn0037906	PGRP-LB	3R:7278571-7286274	-	Known	YES	0.000419797	0.688985	0.964837	0.489062	0.912112	0.201953	0.311235	0.723787	5.87466e-13	7.92595e-12	5.12503e-06	0.000527076	BOTH
FBgn0037912	sea	3R:7385618-7392776	-	Known	YES	0.00757392	0.0885547	0.351483	0.987807	0.99772	2.25596e-06	1.0621e-05	0.323622	0.596436	0.859889	0.000361719	0.0184868	ETOH
FBgn0037989	ATP8B	3R:7894097-7916334	-	Known	YES	0.00626838	0.121419	0.423912	0.00264476	0.591391	1.1504e-06	5.56938e-06	0.502967	0.000189062	0.000760309	0.000185509	0.0108355	BASELINE
FBgn0037996	CG4830	3R:8033881-8036082	-	Known	YES	0.00978749	0.052734	0.255382	0.700158	0.957759	5.83755e-13	4.56383e-12	0.617397	2.62738e-07	1.75474e-06	9.70618e-06	0.000919263	BOTH
FBgn0038020	GstD9	3R:8191885-8193286	-	Known	YES	5.78093e-05	0.881941	1	0.883782	0.985514	7.73908e-06	3.45963e-05	0.892169	6.56708e-36	8.66829e-34	0.000903618	0.0365448	BOTH
FBgn0038071	Dtg	3R:8473780-8478632	+	Known	YES	0.00283782	0.297767	0.674607	0.768642	0.968582	9.85224e-05	0.000388937	0.630856	6.07115e-07	3.8304e-06	1.29603e-06	0.000171071	BOTH
FBgn0038074	Gnmt	3R:8500330-8501806	+	Known	YES	0.00183222	0.402907	0.770975	0.198318	0.790021	0.000284061	0.00105258	0.771342	2.8167e-19	7.5068e-18	0.000237858	0.013452	BOTH
FBgn0038083	CG5999	3R:8567680-8569402	-	Known	YES	0.037774	0.00012671	0.0024165	0.475708	0.907173	0.0992234	0.178334	0.857847	2.22531e-28	1.48918e-26	0.000107672	0.00694214	BOTH
FBgn0038098	CG7381	3R:8793497-8803193	-	Known	YES	0.0223815	0.00329661	0.0354362	0.222284	0.80891	3.04859e-06	1.41538e-05	0.735801	0.000849619	0.00292756	4.23902e-18	3.94782e-15	BOTH
FBgn0038115	CG7966	3R:8875120-8877175	-	Known	YES	0.00694287	0.103034	0.385193	0.457836	0.902646	0	0	0.925311	4.21461e-41	9.35783e-39	5.32613e-05	0.00388194	BOTH
FBgn0038143	CG9813	3R:9198826-9205497	-	Known	YES	0.000122756	0.828667	1	0.558047	0.933309	4.77396e-15	4.55852e-14	0.593787	9.57956e-07	5.8587e-06	2.43685e-05	0.00202228	BOTH
FBgn0038233	HtrA2	3R:10334771-10337434	-	Known	YES	0.00423161	0.203401	0.56068	0.38722	0.879453	0.00789673	0.0214705	0.411378	0.0116443	0.0306533	0.000786363	0.0329143	BOTH
FBgn0038237	Pde6	3R:10339623-10384026	-	Known	YES	0.00397168	0.21789	0.580221	0.509085	0.918359	1.13376e-12	8.65274e-12	0.770326	1.25446e-19	3.47588e-18	0.000415673	0.020385	BOTH
FBgn0038238	CG14854	3R:10384888-10385776	-	Known	YES	0.00161796	0.431884	0.795767	0.218946	0.806364	0.899052	0.930795	0.312977	0.535723	0.792883	0.000755118	0.0319981	ETOH
FBgn0038257	smp-30	3R:10571623-10576968	-	Known	YES	0.0494132	1.09797e-05	0.000296195	0.116001	0.731732	0	0	0.86055	3.75927e-28	2.46648e-26	4.7894e-05	0.0035291	BOTH
FBgn0038282	dpr9	3R:10880652-10902928	-	Known	YES	0.000564807	0.642463	0.937943	0.419552	0.888907	2.31523e-09	1.38049e-08	0.413531	0.0980408	0.198312	5.43625e-05	0.0039536	BOTH
FBgn0038292	CG3987	3R:10965680-10967437	+	Known	YES	0.0786923	2.24693e-08	1.13453e-06	0.222115	0.80891	3.66662e-05	0.000152678	0.774116	3.01939e-12	3.75765e-11	6.2113e-10	1.9282e-07	BOTH
FBgn0038313	CG4338	3R:11101244-11102196	+	Known	YES	0.406073	3.87043e-45	7.20911e-42	0.973007	0.996651	2.48605e-08	1.37292e-07	0.535805	0.000173647	0.000704057	2.11168e-05	0.00178784	BOTH
FBgn0038353	CG5399	3R:11520963-11522864	+	Known	YES	0.00927963	0.059305	0.2752	0.387326	0.879453	2.57669e-07	1.32029e-06	0.701651	3.27496e-13	4.53905e-12	8.34036e-05	0.00560376	BOTH
FBgn0038354	CG5404	3R:11530398-11534156	+	Known	YES	0.00514287	0.160759	0.495839	0.0628504	0.685568	1.22125e-14	1.12572e-13	0.569386	2.22072e-07	1.5023e-06	0.000441766	0.0214033	BOTH
FBgn0038463	CG3534	3R:12822168-12825171	+	Known	YES	0.0126883	0.0273028	0.16592	0.0678656	0.688197	0	0	0.655581	1.57375e-09	1.41041e-08	1.80074e-05	0.00157633	BOTH
FBgn0038465	Irc	3R:12828597-12832930	+	Known	YES	0.0100281	0.0498937	0.246179	0.268387	0.829922	0	0	0.59164	1.38899e-08	1.10562e-07	0.000628256	0.0279583	BOTH
FBgn0038469	CG4009	3R:12859310-12861767	-	Known	YES	0.00342903	0.252318	0.622752	0.229826	0.813008	1.11349e-06	5.39849e-06	0.414699	0.0400587	0.0914073	0.000168978	0.0100155	BOTH
FBgn0038481	CG17475	3R:12955061-12956148	-	Known	YES	0.0378462	0.000124801	0.0023828	0.449673	0.899028	0.0212293	0.0501942	0.778682	3.03637e-15	5.3215e-14	1.47232e-07	2.41973e-05	BOTH
FBgn0038484	CG5246	3R:12961833-12962917	+	Known	YES	0.0317225	0.00045337	0.00705016	0.795425	0.97237	0	0	0.718223	1.09558e-15	2.02936e-14	0.000531123	0.0247663	BOTH
FBgn0038516	P5cr-2	3R:13360537-13362858	+	Known	YES	0.028115	0.000972302	0.0132191	0.895808	0.987134	4.68423e-07	2.34779e-06	0.797429	1.49695e-22	5.71545e-21	0.000637237	0.0281161	BOTH
FBgn0038542	TyrR	3R:13575851-13588910	-	Known	YES	0.0120755	0.0313285	0.181803	0.901299	0.988398	3.19828e-05	0.000134177	0.561748	2.40755e-06	1.38714e-05	0.000130945	0.00813002	BOTH
FBgn0038613	Vha100-4	3R:14212563-14215527	-	Known	YES	3.99603e-06	0.968855	1	0.187129	0.783391	1.25569e-10	8.17037e-10	0.80085	0.117886	0.231946	3.04268e-32	9.27381e-29	BOTH
FBgn0038631	CG7695	3R:14442476-14443233	-	Known	YES	0.0115882	0.0349686	0.196019	0.554781	0.931892	0.175004	0.278365	0.848363	7.80497e-27	4.54301e-25	8.12943e-05	0.00550617	BOTH
FBgn0038641	CG7708	3R:14506326-14512461	+	Known	YES	0.00119031	0.500265	0.847874	0.31221	0.849174	7.08256e-12	5.08415e-11	0.511147	7.65522e-05	0.000334537	0.000237929	0.013452	BOTH
FBgn0038701	CG18493	3R:15215992-15217854	+	Known	YES	0.000344517	0.716927	0.979878	0.278195	0.834862	1.33227e-15	1.35228e-14	0.823504	2.45352e-24	1.11917e-22	0.000179035	0.0105307	BOTH
FBgn0038702	CG3739	3R:15219082-15220910	+	Known	YES	0.0100012	0.0502029	0.247268	0.339245	0.862092	1.52665e-11	1.06222e-10	0.84486	3.71908e-21	1.21615e-19	2.08789e-08	4.40256e-06	BOTH
FBgn0038717	CG17751	3R:15432976-15435044	+	Known	YES	0.0140426	0.0201917	0.134881	0.829264	0.978305	0.00351662	0.0104954	0.89528	3.80055e-34	4.51847e-32	5.48086e-05	0.00396883	BOTH
FBgn0038718	CG17752	3R:15435947-15438159	+	Known	YES	0.00444543	0.192325	0.545708	0.699107	0.957171	5.26024e-11	3.51479e-10	0.931237	2.58666e-42	6.52052e-40	2.80806e-05	0.00228736	BOTH
FBgn0038719	CG16727	3R:15439103-15441506	+	Known	YES	0.032678	0.000370585	0.00597912	0.34479	0.863961	0	0	0.877242	9.32064e-32	8.7533e-30	0.000167605	0.00999872	BOTH
FBgn0038721	subdued	3R:15459140-15468444	-	Known	YES	0.0264998	0.00136977	0.0175685	0.0650102	0.687533	0.000462535	0.00165464	0.723965	9.94206e-15	1.63556e-13	8.24836e-05	0.00555307	BOTH
FBgn0038752	CG4462	3R:15747466-15751093	-	Known	YES	0.028399	0.000915519	0.0125849	0.173433	0.773171	1.15191e-06	5.57587e-06	0.6072	1.83907e-09	1.63464e-08	0.000777691	0.0326349	BOTH
FBgn0038756	CG4783	3R:15774165-15774629	+	Known	YES	0.234841	5.22651e-24	2.30565e-21	0.0805279	0.702637	0.0260866	0.0597579	0.926859	2.30256e-44	7.68764e-42	0.00136145	0.0488709	BOTH
FBgn0038790	MtnC	3R:16186030-16186356	+	Known	YES	0.00105169	0.526352	0.866387	0.878573	0.98537	0.0938524	0.170417	0.788503	5.79369e-14	8.8173e-13	1.88247e-09	5.21601e-07	BOTH
FBgn0038832	CG15695	3R:16667862-16670703	+	Known	YES	0.0830024	8.94735e-09	4.94197e-07	0.378421	0.875148	0.36383	0.484623	0.801681	1.20229e-21	4.13851e-20	0.000120283	0.00758514	BOTH
FBgn0038839	Ktl	3R:16720174-16723042	-	Known	YES	0.00449155	0.19003	0.541947	0.0393672	0.671288	0.000146936	0.000567101	0.498283	0.000977434	0.00332386	5.48046e-05	0.00396883	BOTH
FBgn0038865	cDIP	3R:16984960-16986814	-	Known	YES	0.0140732	0.0200551	0.134209	0.345196	0.863961	0	0	0.808804	3.28781e-19	8.72767e-18	1.04376e-06	0.000142833	BOTH
FBgn0038880	SIFaR	3R:17102386-17119720	-	Known	YES	0.000762848	0.589492	0.906477	0.445997	0.89784	0.235288	0.349769	0.483049	0.564773	0.824989	6.29275e-09	1.51782e-06	ETOH
FBgn0038914	fit	3R:17709646-17710176	-	Known	YES	0.000182141	0.792076	1	0.15421	0.761659	0.0922307	0.168059	0.801626	1.25577e-22	4.83932e-21	0.00041821	0.0204393	BOTH
FBgn0038919	CG17843	3R:17739469-17741268	+	Known	YES	0.0269242	0.00125169	0.0164183	0.658095	0.951149	0.021849	0.0514213	0.596774	1.0301e-08	8.33e-08	0.000537816	0.0249052	BOTH
FBgn0038930	CG5778	3R:17911096-17935903	-	Known	YES	0.0278885	0.00102012	0.0138076	0.175301	0.776013	1.51084e-09	9.13538e-09	0.578101	1.04415e-06	6.35916e-06	7.70511e-05	0.00527202	BOTH
FBgn0038980	Octbeta1R	3R:18322937-18345800	+	Known	YES	0.0222133	0.00341756	0.0364317	0.538477	0.927836	4.307e-07	2.16682e-06	0.385797	0.0509917	0.112805	0.000604869	0.027294	BOTH
FBgn0039051	CG17109	3R:18921412-18922962	+	Known	YES	0.00858365	0.0697538	0.304439	0.558282	0.933393	6.24877e-06	2.81762e-05	0.573184	7.40295e-06	3.90803e-05	2.20926e-05	0.00186574	BOTH
FBgn0039091	CG10182	3R:19412842-19415541	-	Known	YES	0.0866383	4.10528e-09	2.48444e-07	0.987452	0.997713	1.33232e-08	7.52131e-08	0.782003	3.94702e-19	1.0379e-17	5.3066e-05	0.00387613	BOTH
FBgn0039098	GILT3	3R:19503080-19504143	+	Known	YES	0.0341185	0.000273529	0.00464804	0.501679	0.916227	0.000178118	0.000679933	0.854035	1.34355e-25	6.95144e-24	4.8042e-06	0.000503345	BOTH
FBgn0039108	CG10232	3R:19545065-19547347	-	Known	YES	0.00350042	0.24743	0.616865	0.620031	0.944431	0.0532477	0.108036	0.453256	0.0053492	0.0152658	0.00016938	0.0100155	BOTH
FBgn0039152	Root	3R:19939008-19953915	+	Known	YES	0.0116229	0.0346954	0.194988	0.0690789	0.688979	0	0	0.832272	1.05346e-13	1.54977e-12	2.58537e-14	1.5207e-11	BOTH
FBgn0039154	Npc2f	3R:19963617-19966658	+	Known	YES	0.0059212	0.13227	0.444752	0.350745	0.866419	0.0363899	0.07898	0.7215	1.45471e-12	1.88091e-11	3.40222e-06	0.000389304	BOTH
FBgn0039203	CG13618	3R:20350516-20353255	+	Known	YES	0.106341	5.78208e-11	4.92019e-09	0.171002	0.771457	6.16848e-05	0.00024972	0.836013	1.9554e-27	1.19851e-25	0.00115116	0.0434627	BOTH
FBgn0039232	sosie	3R:20659674-20666210	+	Known	YES	0.0204114	0.00503297	0.0492385	0.698937	0.957171	0.837462	0.88692	0.932457	4.42464e-39	7.7263e-37	1.39865e-07	2.32142e-05	BOTH
FBgn0039277	CG13650	3R:20934948-20938238	-	Known	YES	0.0451541	2.68683e-05	0.000642979	0.292015	0.841849	1.56478e-06	7.47936e-06	0.518974	9.93459e-06	5.12663e-05	0.000711741	0.0305538	BOTH
FBgn0039307	CR13656	3R:21094383-21095687	+	Known	YES	0.0504746	8.78389e-06	0.000243789	0.757076	0.967028	0.957466	0.971731	0.898649	3.9489e-22	1.44378e-20	1.42314e-15	1.10962e-12	BOTH
FBgn0039310	CG11878	3R:21099559-21100959	+	Known	YES	0.00344576	0.251162	0.621494	0.553877	0.931437	2.40017e-10	1.53169e-09	0.819423	6.90203e-25	3.33917e-23	0.000615944	0.027682	BOTH
FBgn0039311	CG10513	3R:21101512-21102934	-	Known	YES	8.3833e-05	0.858064	1	0.989982	0.998176	1.02141e-14	9.47769e-14	0.717708	1.06895e-11	1.25442e-10	1.12583e-06	0.000150983	BOTH
FBgn0039312	CG10514	3R:21104149-21105568	-	Known	YES	0.00149845	0.44943	0.810807	0.908696	0.989224	8.8995e-07	4.34868e-06	0.792049	5.07329e-19	1.3165e-17	1.12777e-05	0.0010503	BOTH
FBgn0039313	CG11892	3R:21107270-21108959	+	Known	YES	0.0107767	0.0420392	0.220744	0.753655	0.966888	2.49973e-09	1.48601e-08	0.819956	1.42249e-15	2.5976e-14	7.72341e-11	2.8146e-08	BOTH
FBgn0039342	CG5107	3R:21330913-21331653	+	Known	YES	0.00597461	0.130533	0.441434	0.471242	0.905139	0.00146476	0.00476908	0.81616	1.59309e-20	4.87776e-19	2.50314e-06	0.000297598	BOTH
FBgn0039396	CCAP-R	3R:21749221-21781992	-	Known	YES	0.000114237	0.834629	1	0.727543	0.962316	0.579381	0.685036	0.469279	0.122299	0.239364	7.92465e-07	0.000110245	BOTH
FBgn0039419	CG12290	3R:22055970-22060422	+	Known	YES	0.0991899	2.73915e-10	2.0499e-08	0.557544	0.933219	0	0	0.609607	1.91177e-09	1.69521e-08	0.000644232	0.0282342	BOTH
FBgn0039430	CG5455	3R:22287249-22295730	+	Known	YES	0.00159948	0.434528	0.797791	0.286023	0.838383	8.18024e-09	4.69146e-08	0.703179	4.9831e-15	8.49356e-14	0.000862866	0.0353227	BOTH
FBgn0039434	TwdlM	3R:22444840-22445946	+	Known	YES	1.04032e-10	0.999841	1	0.938169	0.992025	0.0682787	0.132203	0.434902	0.0135068	0.0350118	0.000186156	0.0108443	BOTH
FBgn0039441	TwdlN	3R:22457591-22458678	+	Known	YES	0.0086229	0.0691154	0.303025	0.999	0.999762	0.420074	0.540074	0.569643	9.86567e-05	0.000422695	2.47629e-06	0.000296509	BOTH
FBgn0039453	CG6403	3R:22561139-22562029	-	Known	YES	2.64136e-05	0.92004	1	0.729151	0.962588	0.00434702	0.0127	0.713104	9.29331e-16	1.7358e-14	0.000912685	0.0368226	BOTH
FBgn0039471	CG6295	3R:22831621-22832777	-	Known	YES	0.00479938	0.175494	0.520874	0.186395	0.782809	4.85486e-07	2.42714e-06	0.909623	1.8124e-32	1.82476e-30	4.59354e-08	8.701e-06	BOTH
FBgn0039472	CG17192	3R:22842902-22844009	-	Known	YES	0.00641433	0.117155	0.415509	0.480175	0.909262	2.88977e-06	1.34575e-05	0.93442	2.54399e-33	2.78733e-31	6.58804e-13	3.29668e-10	BOTH
FBgn0039474	CG6283	3R:22845960-22847100	-	Known	YES	0.00919804	0.060439	0.278308	0.999837	0.999951	2.11569e-07	1.0931e-06	0.830489	1.07701e-19	2.99908e-18	3.5869e-08	7.074e-06	BOTH
FBgn0039475	CG6277	3R:22847793-22848939	-	Known	YES	0.0163326	0.0121948	0.0945516	0.457365	0.902441	0.554275	0.663302	0.854235	7.55114e-10	7.06973e-09	4.00499e-23	4.97316e-20	BOTH
FBgn0039485	CG17189	3R:22927128-22928639	+	Known	YES	0.00221509	0.357688	0.733367	0.945565	0.992718	0.273525	0.391756	0.950068	6.58656e-26	3.54459e-24	1.99604e-28	5.14779e-25	BOTH
FBgn0039519	Cyp6a18	3R:23304397-23308626	+	Known	YES	0.000279752	0.743886	0.993201	0.590056	0.940253	0.0326116	0.0720033	0.946333	4.88245e-50	3.14796e-47	0.000617383	0.0277095	BOTH
FBgn0039591	CG9988	3R:24462133-24464521	+	Known	YES	0.0230884	0.00283377	0.0313957	0.21711	0.80555	0.16763	0.269062	0.739114	8.71407e-17	1.80121e-15	0.000297856	0.0161589	BOTH
FBgn0039611	CG14528	3R:24701343-24703527	+	Known	YES	0.0109723	0.0402086	0.214354	0.866234	0.983726	3.16376e-10	2.00409e-09	0.865698	7.38647e-27	4.31439e-25	2.48764e-06	0.000296809	BOTH
FBgn0039678	Obp99a	3R:25497379-25498056	+	Known	YES	0.0444496	3.11542e-05	0.000731959	0.0816363	0.702796	1.24688e-06	6.02165e-06	0.775188	8.90601e-17	1.83636e-15	3.75135e-06	0.000416462	BOTH
FBgn0039685	Obp99b	3R:25541976-25542618	-	Known	YES	0.00660011	0.111963	0.404939	0.907778	0.989224	0.278365	0.396924	0.730959	3.4585e-15	6.03061e-14	7.6885e-05	0.00527142	BOTH
FBgn0039703	CG7829	3R:25642460-25643486	-	Known	YES	0.0555833	2.99882e-06	9.2665e-05	0.350808	0.866472	0.00625078	0.0175219	0.879684	5.84364e-05	0.000260948	1.04488e-38	7.00632e-35	BOTH
FBgn0039714	Zip99C	3R:25689423-25694617	-	Known	YES	0.000887427	0.560578	0.888797	0.627038	0.945371	5.55112e-16	5.86727e-15	0.508949	2.41566e-05	0.000116784	0.000669518	0.0290387	BOTH
FBgn0039722	Capa	3R:25738713-25740068	-	Known	YES	0.00267424	0.312142	0.688869	0.648272	0.948861	2.81997e-14	2.51501e-13	0.44315	0.0775105	0.162155	1.15166e-05	0.00106662	BOTH
FBgn0039756	CG9743	3R:26022082-26028720	-	Known	YES	0.0137888	0.0213615	0.140429	0.179904	0.779905	0.604528	0.706145	0.63509	4.82251e-06	2.63287e-05	1.04047e-07	1.80745e-05	BOTH
FBgn0039760	CG9682	3R:26076650-26078552	+	Known	YES	0.0127945	0.0266613	0.163324	0.142118	0.752339	3.37508e-14	2.98546e-13	0.923392	2.05317e-27	1.25354e-25	8.53186e-16	6.81066e-13	BOTH
FBgn0039761	CG18404	3R:26078904-26079819	+	Known	YES	0.000270391	0.74806	0.994902	0.635932	0.946814	1.11022e-16	1.26222e-15	0.930332	2.73639e-21	9.08346e-20	6.96814e-26	1.22958e-22	BOTH
FBgn0039768	CG15533	3R:26254542-26257084	+	Known	YES	0.0206555	0.00477537	0.0472701	0.17668	0.777329	0	0	0.804487	9.3696e-11	9.79834e-10	1.44215e-14	8.95389e-12	BOTH
FBgn0039769	CG15534	3R:26257786-26260861	+	Known	YES	0.0244058	0.0021389	0.0251089	0.554121	0.931437	0.15785	0.256795	0.890887	4.5445e-26	2.50186e-24	3.55336e-10	1.16797e-07	BOTH
FBgn0039774	CDase	3R:26285243-26291458	+	Known	YES	0.00839726	0.0728732	0.31286	0.317544	0.852686	9.92539e-14	8.36879e-13	0.634294	4.04142e-09	3.43465e-08	5.91889e-05	0.00420946	BOTH
FBgn0039777	Jon99Fii	3R:26312738-26313650	-	Known	YES	0.00160917	0.433139	0.796985	0.503215	0.916913	1.70463e-09	1.0259e-08	0.940245	9.15994e-46	3.74519e-43	5.67671e-05	0.00406628	BOTH
FBgn0039778	Jon99Fi	3R:26314685-26315617	+	Known	YES	0.0337296	0.000296887	0.00499435	0.467894	0.904715	8.50847e-09	4.8722e-08	0.889886	8.41151e-29	5.83877e-27	8.31446e-08	1.49069e-05	BOTH
FBgn0039787	CG9702	3R:26405151-26407839	+	Known	YES	0.00870683	0.0677707	0.298937	0.750439	0.966594	0.000531363	0.00187999	0.653029	6.27426e-11	6.69714e-10	0.000214077	0.0123534	BOTH
FBgn0039858	CycG	3R:27422364-27438386	-	Known	YES	0.000939265	0.549341	0.880636	0.743303	0.964961	2.44249e-15	2.41198e-14	0.452313	0.0333915	0.078064	2.08829e-05	0.00178607	BOTH
FBgn0039911	CG1909	4:603734-609974	+	Known	YES	0.00616531	0.124534	0.430318	0.194244	0.78868	3.96694e-08	2.16259e-07	0.709008	6.32525e-14	9.55685e-13	0.000115986	0.00736048	BOTH
FBgn0039930	CG11077	4:1049301-1049987	-	Known	YES	0.0244683	0.00211058	0.0248547	0.939459	0.992025	0.0023037	0.00716242	0.946738	3.15026e-50	2.07096e-47	0.000639846	0.0281524	BOTH
FBgn0039938	Sox102F	4:821062-855019	-	Known	YES	0.00674649	0.10805	0.396482	0.930133	0.990599	0.258016	0.374942	0.652501	8.99567e-10	8.33603e-09	3.62446e-05	0.0027871	BOTH
FBgn0040001	FASN3	3LHet:1135558-1145478	-	Known	YES	-1.11022e-16	1	1	0.543611	0.929688	0.639995	0.734919	0.689856	1.57225e-13	2.26625e-12	0.000384721	0.0191943	BOTH
FBgn0040069	vanin-like	X:6094221-6096592	-	Known	YES	0.015694	0.0140268	0.10459	0.184418	0.781612	0	0	0.864269	1.44125e-25	7.42254e-24	4.47035e-07	6.72096e-05	BOTH
FBgn0040099	lectin-28C	2L:7857077-7860120	+	Known	YES	0.00271308	0.308649	0.685576	0.810939	0.974676	3.47068e-11	2.35615e-10	0.922994	1.02656e-42	2.75339e-40	0.000741389	0.0315438	BOTH
FBgn0040271	Sulf1	3R:12136264-12165297	-	Known	YES	0.00432619	0.198412	0.553886	0.587365	0.939713	9.13336e-12	6.48958e-11	0.62728	8.32701e-11	8.77372e-10	0.00122905	0.0453813	BOTH
FBgn0040299	Myo28B1	2L:7666047-7689459	+	Known	YES	0.0508727	8.07878e-06	0.000225714	0.163255	0.767519	0.00849067	0.0228849	0.658307	7.11362e-12	8.50262e-11	0.000536415	0.0248747	BOTH
FBgn0040393	CG14265	X:3130163-3130719	-	Known	YES	0.00656222	0.113001	0.406719	0.577865	0.937233	0.110745	0.194342	0.458705	0.000489917	0.00178522	0.00108321	0.0415525	BOTH
FBgn0040502	CG8343	2R:2067231-2067861	+	Known	YES	0.00103044	0.530562	0.869751	0.375518	0.874328	2.22045e-16	2.42491e-15	0.825728	2.36829e-23	9.7187e-22	3.43517e-05	0.00265984	BOTH
FBgn0040582	CG5791	3R:17912797-17913551	+	Known	YES	0.0421306	5.07123e-05	0.00110836	0.234699	0.813008	2.5977e-12	1.93434e-11	0.688466	1.6774e-10	1.70058e-09	3.69934e-06	0.000415714	BOTH
FBgn0040600	CG13631	3R:20595073-20596655	+	Known	YES	0.0478379	1.52881e-05	0.000397955	0.81464	0.9753	1.13499e-05	4.99216e-05	0.68108	7.28599e-11	7.72053e-10	1.5209e-05	0.00136705	BOTH
FBgn0040606	CG6503	3R:22250420-22250827	-	Known	YES	0.0215413	0.0039474	0.0406839	0.949532	0.992801	4.79548e-10	3.00085e-09	0.737688	5.05273e-14	7.74236e-13	5.77697e-06	0.000581635	BOTH
FBgn0040653	IM4	2R:16756001-16756826	-	Known	YES	8.81851e-05	0.854466	1	0.783878	0.970648	0	0	0.65671	3.86939e-09	3.29596e-08	8.01355e-06	0.000778754	BOTH
FBgn0040705	ND-B8	2L:4454626-4455207	+	Known	YES	0.120188	2.76227e-12	3.07676e-10	0.560032	0.93371	0.118251	0.20496	0.673654	1.57143e-12	2.02246e-11	0.000385557	0.0192074	BOTH
FBgn0040732	CG16926	2R:15387800-15388923	-	Known	YES	0.000151492	0.81001	1	0.120331	0.736086	2.09454e-05	8.97133e-05	0.847101	3.80525e-18	8.99708e-17	2.21569e-11	9.28566e-09	BOTH
FBgn0040734	CG15065	2R:14277464-14277747	+	Known	YES	0.0580668	1.77733e-06	5.7685e-05	0.887121	0.985863	1.36209e-07	7.14984e-07	0.540877	4.22507e-06	2.33791e-05	0.000346365	0.0179438	BOTH
FBgn0040736	IM3	2R:14275400-14276239	+	Known	YES	0.0209225	0.00450871	0.0452721	0.421745	0.889733	0	0	0.604572	5.65894e-08	4.17971e-07	9.46653e-05	0.00619891	BOTH
FBgn0040813	Nplp2	3L:13349476-13350323	+	Known	YES	0.00237222	0.341157	0.717098	0.950512	0.992801	0.781623	0.845159	0.615818	1.75426e-07	1.20375e-06	1.56237e-05	0.00139684	BOTH
FBgn0040850	CG15210	X:10733263-10733928	+	Known	YES	0.00217132	0.362486	0.737936	0.777161	0.969828	5.89756e-07	2.92834e-06	0.432545	0.0130841	0.0340424	0.000220786	0.0126535	BOTH
FBgn0040949	CG13998	2L:5956489-5956819	-	Known	YES	0.0367948	0.000155696	0.0028984	0.902163	0.988398	0.0293826	0.0660442	0.48884	0.066215	0.141635	4.94467e-07	7.40089e-05	ETOH
FBgn0040959	Peritrophin-15a	2L:8395665-8396096	-	Known	YES	0.022565	0.00316956	0.0343637	0.864905	0.983665	4.80815e-10	3.00765e-09	0.826243	7.25986e-18	1.66942e-16	2.55798e-09	6.86092e-07	BOTH
FBgn0041180	Tep4	2L:19548507-19556451	+	Known	YES	0.000795996	0.581514	0.901735	0.558343	0.933393	0.0247036	0.0570578	0.739619	6.91198e-18	1.5927e-16	0.00111049	0.0424049	BOTH
FBgn0041182	Tep2	2L:7693727-7701601	-	Known	YES	0.014256	0.0192593	0.130552	0.603788	0.942258	4.46669e-05	0.000183733	0.67285	8.15744e-10	7.60552e-09	5.50076e-06	0.000560559	BOTH
FBgn0041194	Prat2	3L:6905099-6907976	-	Known	YES	0.00541075	0.15024	0.478723	0.222125	0.80891	1.25899e-13	1.05045e-12	0.688431	1.57703e-12	2.02889e-11	0.000105927	0.00686925	BOTH
FBgn0042175	CG18858	2L:20456847-20459075	-	Known	YES	0.102315	1.38959e-10	1.104e-08	0.856971	0.982903	1.08802e-14	1.00679e-13	0.765528	4.88069e-19	1.26947e-17	0.000336142	0.0176367	BOTH
FBgn0043470	lambdaTry	2R:7224345-7225296	+	Known	YES	0.00309834	0.276573	0.652175	0.964506	0.994995	0.000605216	0.00212158	0.73671	2.30545e-16	4.58451e-15	0.0002173	0.0124964	BOTH
FBgn0043535	Obp57a	2R:16392655-16393263	+	Known	YES	0.283963	1.49218e-29	1.06443e-26	0.72249	0.961481	5.32326e-06	2.41459e-05	0.801829	1.89545e-19	5.13734e-18	4.92089e-06	0.000512368	BOTH
FBgn0043575	PGRP-SC2	2R:4604455-4605200	+	Known	YES	0.000678515	0.610848	0.918855	0.611419	0.943101	0.984426	0.990038	0.884543	1.45359e-30	1.2063e-28	6.29751e-06	0.000626519	BOTH
FBgn0043576	PGRP-SC1a	2R:4597238-4597825	+	Known	YES	0	1	1	0.0432485	0.672871	0.0996315	0.178895	0.832806	5.183e-22	1.85454e-20	1.28159e-06	0.000169833	BOTH
FBgn0043783	CG32444	3L:21630047-21632160	+	Known	YES	0.0972759	4.1467e-10	3.00013e-08	0.684695	0.953856	0	0	0.829565	1.73362e-19	4.72546e-18	2.97366e-08	5.96993e-06	BOTH
FBgn0043791	phu	3R:5320523-5322445	+	Known	YES	0.0231653	0.00278754	0.0310079	0.426596	0.891172	6.28386e-14	5.39472e-13	0.623504	0.000422948	0.00156687	1.68532e-09	4.78845e-07	BOTH
FBgn0044050	Ilp3	3L:9794398-9795220	-	Known	YES	0.0153024	0.0152876	0.111232	0.545394	0.929804	0.0988203	0.177743	0.519294	0.00715761	0.0198129	1.1466e-06	0.000153156	BOTH
FBgn0044812	TotC	3R:16698710-16699302	+	Known	YES	0.00753484	0.0893841	0.353352	0.740943	0.964365	9.83787e-08	5.22049e-07	0.742555	3.67375e-17	7.90056e-16	0.000342572	0.0178345	BOTH
FBgn0046302	CG10650	2L:18993360-18995934	-	Known	YES	0.01716	0.0101785	0.08301	0.717874	0.96042	0.000309473	0.00113999	0.692482	9.76002e-11	1.01876e-09	3.65928e-06	0.00041308	BOTH
FBgn0046776	CR14033	2L:5242699-5244239	+	Known	YES	0.01417	0.0196298	0.132307	9.69167e-05	0.203016	4.885e-07	2.44184e-06	0.874035	4.98274e-33	5.32027e-31	0.00130935	0.0475093	BOTH
FBgn0050043	CG30043	2R:8246941-8250670	+	Known	YES	0.0236815	0.0024964	0.0284012	0.732976	0.963316	2.22045e-16	2.42491e-15	0.734533	4.01635e-16	7.78809e-15	0.000196086	0.011374	BOTH
FBgn0050281	CG30281	2R:18002502-18003694	+	Known	YES	0.147678	5.82014e-15	1.00583e-12	0.000338557	0.378235	3.98254e-05	0.000164933	0.755645	2.45646e-14	3.88113e-13	9.26412e-07	0.000127294	BOTH
FBgn0050334	CG30334	2R:8328138-8328825	-	Known	YES	0.000515792	0.657296	0.945655	0.573171	0.93659	0.816403	0.871252	0.569605	0.00277976	0.008474	4.40242e-08	8.46031e-06	BOTH
FBgn0050360	Mal-A6	2R:4352663-4355100	+	Known	YES	0.0798469	1.75626e-08	9.08676e-07	0.957768	0.994459	0	0	0.86602	1.55222e-30	1.28227e-28	0.000338118	0.0177126	BOTH
FBgn0050463	CG30463	2R:12560740-12620421	-	Known	YES	0.000228355	0.767861	1	0.329921	0.85693	2.22045e-16	2.42491e-15	0.454336	0.000842874	0.00290611	0.000878696	0.0358395	BOTH
FBgn0051030	CG31030	3R:25990414-25992141	-	Known	YES	0.106455	5.63927e-11	4.83549e-09	0.900955	0.988398	4.44089e-16	4.71912e-15	0.460807	0.000785918	0.00273335	0.000656284	0.0285756	BOTH
FBgn0051041	CG31041	3R:25415792-25416628	-	Known	YES	0.0756419	4.30388e-08	2.01531e-06	0.169404	0.770802	0.376641	0.497262	0.896905	6.39003e-36	8.50153e-34	0.000323774	0.0170948	BOTH
FBgn0051077	CG31077	3R:22825474-22828683	+	Known	YES	0.00649327	0.114917	0.410794	0.938775	0.992025	0.552349	0.661568	0.851103	3.40553e-29	2.47137e-27	0.000883743	0.0359578	BOTH
FBgn0051087	CG31087	3R:21136749-21139555	-	Known	YES	0.000150808	0.810431	1	0.963472	0.994968	6.20244e-08	3.33677e-07	0.575151	1.06746e-06	6.49638e-06	9.416e-05	0.00617789	BOTH
FBgn0051091	CG31091	3R:21725625-21727894	+	Known	YES	0.0609394	9.69836e-07	3.38705e-05	0.975389	0.996774	0	0	0.678344	3.16621e-07	2.08963e-06	1.13105e-08	2.59732e-06	BOTH
FBgn0051106	CG31106	3R:21042019-21044430	+	Known	YES	0.000122945	0.828536	1	0.737261	0.963859	1.07325e-12	8.20697e-12	0.671194	1.41377e-09	1.2759e-08	4.19574e-06	0.000455244	BOTH
FBgn0051148	Gba1a	3R:19526343-19528327	+	Known	YES	0.00892403	0.0644186	0.290018	0.921467	0.990437	0	0	0.637429	0.000145719	0.000600261	1.31962e-09	3.95027e-07	BOTH
FBgn0051205	CG31205	3R:16557353-16558429	+	Known	YES	0.0258961	0.00155728	0.019421	0.566444	0.935575	0.00576628	0.0163215	0.933321	8.96166e-40	1.7169e-37	2.79774e-07	4.34258e-05	BOTH
FBgn0051343	CG31343	3R:17570988-17574725	+	Known	YES	0.00114911	0.507781	0.853909	0.833259	0.978519	6.73423e-09	3.89011e-08	0.663851	4.70355e-12	5.72192e-11	0.000443552	0.0214588	BOTH
FBgn0051352	Unc-115a	3R:5520108-5531139	-	Known	YES	0.0216184	0.0038826	0.0401518	0.292285	0.841849	0.00015092	0.000581607	0.780419	4.11119e-21	1.33486e-19	0.000820901	0.0340202	BOTH
FBgn0051380	CG31380	3R:21613719-21615177	-	Known	YES	1.11112e-05	0.948089	1	0.152967	0.761071	0.00345896	0.0103398	0.846713	9.56177e-23	3.73198e-21	2.37519e-07	3.73863e-05	BOTH
FBgn0051410	Npc2e	3R:5879054-5880070	+	Known	YES	0.0267222	0.00130655	0.0169532	0.311899	0.848919	3.24258e-11	2.20622e-10	0.652911	1.07937e-05	5.53757e-05	5.1921e-09	1.27062e-06	BOTH
FBgn0051446	CG31446	3R:11518808-11519916	+	Known	YES	0.00100908	0.534856	0.871507	0.39994	0.881742	0.000400014	0.00144642	0.807485	1.40555e-06	8.38055e-06	3.47866e-21	3.76223e-18	BOTH
FBgn0051463	CG31463	3R:4118057-4119331	+	Known	YES	0.00341809	0.253077	0.623522	0.67716	0.953166	0	0	0.731732	1.13524e-15	2.09703e-14	0.000140779	0.00861293	BOTH
FBgn0051619	nolo	2L:21684106-21729051	+	Known	YES	0.00261953	0.31715	0.693488	0.893696	0.986748	6.18362e-07	3.06583e-06	0.780643	1.16083e-09	1.05816e-08	1.9856e-13	1.02417e-10	BOTH
FBgn0051663	CG31663	2L:1858609-1881480	-	Known	YES	0.000490331	0.665335	0.950961	0.0935156	0.713763	1.0195e-10	6.67767e-10	0.669952	3.59596e-11	3.95543e-10	7.24567e-05	0.00500878	BOTH
FBgn0051769	CG31769	2L:14109597-14110739	-	Known	YES	0.0182587	0.00801517	0.0699621	0.597272	0.941087	1.19504e-12	9.10712e-12	0.852752	2.58204e-24	1.1746e-22	8.48532e-07	0.000117213	BOTH
FBgn0051781	lncRNA:CR31781	2L:16869346-16878300	+	Known	YES	0.00495177	0.168774	0.509683	0.398823	0.881742	0.597875	0.700692	0.568189	5.2047e-08	3.86399e-07	0.00122479	0.0452739	BOTH
FBgn0051864	Qtzl	2L:11995740-11996723	+	Known	YES	0.02231	0.0033475	0.0358796	0.0328193	0.664932	0.00131555	0.00432612	0.77959	3.01525e-15	5.28725e-14	1.27488e-07	2.13714e-05	BOTH
FBgn0051869	CG31869	2L:10772038-10801109	-	Known	YES	8.04395e-05	0.860936	1	0.803188	0.973721	1.66422e-12	1.25542e-11	0.605519	1.94598e-06	1.13922e-05	4.82351e-06	0.000503794	BOTH
FBgn0051901	Mur29B	2L:8352187-8355172	+	Known	YES	0.0058041	0.13617	0.452137	0.587627	0.939713	0.00552727	0.0157185	0.74892	3.64002e-12	4.48342e-11	3.78676e-08	7.42448e-06	BOTH
FBgn0051955	CG31955	2L:3711881-3713105	-	Known	YES	0.0332059	0.000331541	0.00547027	0.320813	0.854197	0.400712	0.521914	0.798806	3.23194e-17	6.9953e-16	1.84747e-07	2.97789e-05	BOTH
FBgn0052107	CG32107	3L:12850382-12854405	-	Known	YES	0.0487118	1.27234e-05	0.000337216	0.482494	0.910469	1.93682e-08	1.07796e-07	0.738039	6.60932e-11	7.03016e-10	1.36429e-08	3.06984e-06	BOTH
FBgn0052183	Ccn	3L:17683115-17741939	+	Known	YES	9.59428e-05	0.848274	1	0.345839	0.864332	7.88802e-11	5.20731e-10	0.324374	0.294906	0.496251	0.00121264	0.0450235	BASELINE
FBgn0052267	CG32267	3L:3471555-3472113	-	Known	YES	0.00923455	0.0599288	0.27683	0.353011	0.86716	0.00751372	0.0205491	0.866424	2.34429e-24	1.07227e-22	3.12952e-08	6.24544e-06	BOTH
FBgn0052274	Drsl1	3L:3335579-3335788	-	Known	RARE	0.000772972	0.587032	0.905176	0.514491	0.920575	0.418777	0.538882	0.243727	0.999999	1	0.00135882	0.0488287	BASELINE
FBgn0052282	Drsl4	3L:3315620-3315942	+	Known	YES	0.00550734	0.14664	0.472	0.362442	0.870359	5.91763e-08	3.18713e-07	0.891016	1.30641e-29	9.95592e-28	2.28925e-07	3.62037e-05	BOTH
FBgn0052483	CG32483	3L:688523-690081	-	Known	YES	0.00666763	0.110139	0.40111	0.806285	0.974124	1.77636e-15	1.77774e-14	0.923212	1.12835e-31	1.04793e-29	1.81086e-11	7.68516e-09	BOTH
FBgn0052493	tRNA:Gln-TTG-2-1	X:3321485-3321556	-	Known	RARE	0	1	1	0.156645	0.762718	0.578578	0.68437	0.337574	1	1	9.53266e-06	0.000908982	BOTH
FBgn0052581	CG32581	X:15690941-15693195	-	Known	YES	0.00390889	0.221572	0.585324	0.461036	0.903603	0.00036053	0.00131357	0.936287	6.27573e-40	1.21622e-37	7.87309e-08	1.42682e-05	BOTH
FBgn0052645	CG32645	X:13033232-13047495	+	Known	YES	0.0009404	0.5491	0.880516	0.548099	0.930471	0.0306167	0.0683098	0.42284	0.015987	0.040652	0.000307255	0.0164558	BOTH
FBgn0052750	CG32750	X:6088770-6090472	-	Known	YES	0.0210627	0.00437489	0.0441532	0.374032	0.874328	6.83574e-10	4.23409e-09	0.811276	9.44411e-20	2.64743e-18	1.66993e-06	0.000215338	BOTH
FBgn0053155	CG33155	2R:9841700-9843169	+	Known	YES	2.75359e-05	0.918364	1	0.481874	0.910299	0.414464	0.534873	0.344839	0.970616	1	3.20315e-05	0.00251504	ETOH
FBgn0053229	CG33229	3L:223852-225605	+	Known	YES	0.00447172	0.191013	0.54364	0.871726	0.984239	0	0	0.701919	3.09886e-13	4.31117e-12	8.4212e-05	0.00564675	BOTH
FBgn0053258	CG33258	3L:16075651-16076738	+	Known	YES	0.00897627	0.0636389	0.287977	0.138458	0.750086	7.09538e-05	0.000285108	0.842327	1.84514e-21	6.24238e-20	6.62898e-08	1.20788e-05	BOTH
FBgn0053265	Muc68E	3L:11960443-11966079	-	Known	YES	0.0242669	0.00220319	0.0257464	0.469232	0.904715	8.21565e-15	7.67221e-14	0.768602	1.70557e-12	2.18755e-11	2.97929e-09	7.80364e-07	BOTH
FBgn0053301	CG33301	2L:10049580-10051201	+	Known	YES	0.19355	1.31499e-19	3.76819e-17	0.982819	0.997699	0.264201	0.381613	0.871737	1.38098e-32	1.4073e-30	0.00121933	0.0451718	BOTH
FBgn0053306	CG33306	2L:13842888-13843742	-	Known	YES	0.0226318	0.00312455	0.0340229	0.468998	0.904715	0	0	0.835365	8.0694e-20	2.28692e-18	1.52955e-08	3.41876e-06	BOTH
FBgn0053307	CG33307	2L:13839262-13841520	-	Known	YES	0.0044255	0.193327	0.547116	0.283639	0.837613	9.24409e-11	6.06905e-10	0.763234	1.64641e-16	3.31526e-15	1.25608e-05	0.00115062	BOTH
FBgn0053346	CG33346	3R:24494955-24496174	+	Known	YES	0.229146	2.18015e-23	9.02395e-21	0.369225	0.872693	4.2871e-11	2.88817e-10	0.948502	3.97325e-42	9.79493e-40	1.78638e-09	4.99098e-07	BOTH
FBgn0053494	CG33494	3R:21319203-21320883	-	Known	YES	0.00195636	0.387401	0.759079	0.168571	0.770084	4.37428e-14	3.81991e-13	0.80804	4.45843e-16	8.6204e-15	3.36933e-09	8.62316e-07	BOTH
FBgn0053532	lectin-37Da	2L:19418317-19419029	+	Known	YES	0.00928569	0.0592218	0.274932	0.810832	0.974639	3.86929e-09	2.27275e-08	0.901006	6.51738e-30	5.03475e-28	1.31509e-08	2.99939e-06	BOTH
FBgn0053533	lectin-37Db	2L:19419075-19419767	+	Known	YES	0.0132178	0.0242562	0.153065	0.850666	0.981934	5.95994e-11	3.96651e-10	0.774064	2.41865e-16	4.78974e-15	2.14571e-06	0.000265479	BOTH
FBgn0053926	CG33926	3L:9436332-9439488	+	Known	YES	0.037857	0.000124518	0.00237876	0.0189762	0.645654	8.68615e-05	0.000345139	0.782259	6.61991e-20	1.89374e-18	0.000148047	0.00899196	BOTH
FBgn0053966	CG33966	3L:1234130-1235420	+	Known	YES	0.0153827	0.01502	0.109783	0.302892	0.845307	2.15401e-07	1.11204e-06	0.720935	1.47299e-14	2.37656e-13	8.80003e-05	0.00584235	BOTH
FBgn0053978	CG33978	4:178201-196265	-	Known	YES	0.11875	3.79513e-12	4.11778e-10	0.0655232	0.687533	0.00638769	0.0178691	0.590877	0.00364972	0.0108479	3.14579e-09	8.17588e-07	BOTH
FBgn0054054	CG34054	2R:7297315-7297943	-	Known	YES	0.00415388	0.207611	0.566827	0.548224	0.93048	0.0758442	0.1439	0.850107	2.31202e-11	2.59422e-10	4.66987e-20	4.89271e-17	BOTH
FBgn0058469	lncRNA:CR40469	X:18880-19093	+	Known	YES	0.0136274	0.0221417	0.143596	0.384335	0.877642	1.48315e-07	7.76222e-07	0.9806	1.17491e-70	1.31304e-66	0.000372097	0.0188449	BOTH
FBgn0061356	CG18003	2R:6771052-6772441	+	Known	YES	0.00264079	0.315192	0.691677	0.358239	0.869568	0	0	0.78723	1.75855e-17	3.90199e-16	1.99799e-06	0.000250012	BOTH
FBgn0062412	Ctr1B	3R:4143334-4144927	+	Known	YES	0.00337889	0.255821	0.626602	0.985335	0.997699	2.12383e-08	1.17773e-07	0.592894	2.4477e-08	1.89131e-07	0.000399227	0.0197058	BOTH
FBgn0063493	GstE7	2R:14294429-14295193	+	Known	YES	0.0617078	8.24647e-07	2.93191e-05	0.246466	0.818932	2.29705e-13	1.86864e-12	0.904493	1.28283e-38	2.13976e-36	0.00110423	0.042214	BOTH
FBgn0063495	GstE5	2R:14292110-14292843	+	Known	YES	0.0460459	2.22782e-05	0.000547194	0.0764709	0.697225	0.883469	0.920062	0.931686	1.00827e-32	1.04334e-30	1.08369e-12	5.19042e-10	BOTH
FBgn0065032	Arpc3B	X:16998604-16999885	-	Known	YES	0.0366526	0.000160424	0.00297485	0.229564	0.812895	0.00754223	0.0206221	0.564629	0.00015809	0.000645745	2.31665e-06	0.000281414	BOTH
FBgn0065070	snoRNA:291	3R:24638290-24638363	+	Known	YES	2.22045e-16	1	1	0.802084	0.973689	0.317266	0.438485	0.389626	0.999999	1	3.22316e-07	4.95701e-05	ETOH
FBgn0082925	snoRNA:Or-aca1	2R:18495049-18495183	+	Known	YES	0.00190889	0.393228	0.763788	0.717003	0.960381	0.114422	0.199558	0.294454	0.947861	1	0.000508626	0.0238166	ETOH
FBgn0082962	snoRNA:Psi28S-3385a	3R:1422082-1422231	-	Known	YES	3.82616e-07	0.99036	1	0.741223	0.964365	0.0426109	0.0901153	0.313804	1	1	6.99275e-05	0.00484393	ETOH
FBgn0082966	snoRNA:Psi28S-3327b	3L:13036044-13036183	+	Known	YES	0.000156868	0.806733	1	0.962557	0.994968	0.631573	0.728468	0.344309	0.999999	1	1.05649e-05	0.000992183	ETOH
FBgn0082973	snoRNA:Psi28S-3308	3L:832487-832639	-	Known	YES	0.000790887	0.582729	0.902701	0.941876	0.992145	0.0528419	0.107356	0.425708	1	1	2.84054e-08	5.8012e-06	ETOH
FBgn0082979	snoRNA:Psi28S-3091a	3R:1422419-1422553	-	Known	YES	-1.11022e-16	1	1	0.39773	0.881742	0.0682033	0.132102	0.353028	0.130318	0.25267	0.000976916	0.038533	ETOH
FBgn0082980	snoRNA:Psi28S-2996	2L:22428190-22428325	-	Known	YES	0.0218478	0.00369617	0.0387982	0.762555	0.968312	0.00267834	0.00820542	0.2649	1	1	0.000398609	0.0197058	ETOH
FBgn0082987	snoRNA:Psi28S-2444	2R:15330632-15330761	+	Known	YES	0	1	1	0.939333	0.992025	0.226317	0.339597	0.265421	1	1	0.000717052	0.0307032	ETOH
FBgn0082994	snoRNA:Psi28S-1837c	3L:5757046-5757184	-	Known	YES	0	1	1	0.727507	0.962316	0.00908459	0.0242535	0.309898	0.478052	0.726416	0.00107556	0.0414935	ETOH
FBgn0083001	snoRNA:Psi28S-1192a	X:17038468-17038607	-	Known	YES	0.0167919	0.0110298	0.0879841	0.500245	0.915961	0.0820808	0.153212	0.343086	1	1	2.10633e-05	0.00178782	ETOH
FBgn0083003	snoRNA:Psi28S-1175c	2R:18494890-18495025	+	Known	YES	0.0140305	0.0202461	0.135163	0.597486	0.941087	0.00166716	0.00536346	0.419538	0.999999	1	1.65997e-07	2.68859e-05	ETOH
FBgn0083004	snoRNA:Psi28S-1175b	2R:18494737-18494877	+	Known	YES	0.000102225	0.843447	1	0.786719	0.971306	0.000287735	0.00106513	0.405141	0.367744	0.591084	9.04531e-06	0.000868946	ETOH
FBgn0083005	snoRNA:Psi28S-1175a	2R:18494590-18494725	+	Known	YES	0.0322923	0.000401998	0.0063997	0.762767	0.968362	0.00121618	0.00402582	0.407976	0.498368	0.750788	3.70741e-06	0.000415714	ETOH
FBgn0083009	snoRNA:Psi28S-1135d	X:17040107-17040248	-	Known	YES	0.00735451	0.0933218	0.362759	0.62455	0.944898	0.0296149	0.0664908	0.346938	0.839281	1	4.42136e-05	0.00330882	ETOH
FBgn0083010	snoRNA:Psi28S-1135c	X:17040281-17040423	-	Known	YES	0.00924986	0.0597161	0.276381	0.272777	0.830948	0.0856815	0.158509	0.756354	4.10049e-19	1.07237e-17	0.000955619	0.0379983	BOTH
FBgn0083011	snoRNA:Psi28S-1135b	X:17040434-17040578	-	Known	YES	0.00266938	0.312582	0.689164	0.854789	0.982679	0.637932	0.733326	0.39171	0.737304	1	3.89622e-06	0.000426891	ETOH
FBgn0083012	snoRNA:Psi28S-1135a	X:17040645-17040792	-	Known	YES	0.00536466	0.151993	0.481516	0.804905	0.974057	0.995259	0.997101	0.326588	0.619385	0.884153	0.000286974	0.0157318	ETOH
FBgn0083013	snoRNA:Psi28S-1060	X:6636885-6637034	-	Known	YES	0.0115959	0.0349077	0.195831	0.803328	0.973721	0.00190571	0.00605302	0.342075	1	1	2.853e-05	0.00229732	ETOH
FBgn0083016	snoRNA:Psi18S-841d	2R:17218411-17218548	+	Known	YES	0.0241378	0.00226471	0.0263094	0.843406	0.98112	0.488375	0.60519	0.361164	0.936099	1	1.34116e-05	0.00121527	ETOH
FBgn0083027	snoRNA:Psi18S-531	X:657116-657267	-	Known	YES	0.00261818	0.317275	0.693616	0.88025	0.985513	0.364071	0.484849	0.308719	0.880525	1	0.000306782	0.0164558	ETOH
FBgn0083028	snoRNA:Psi18S-525k	2L:5202383-5202522	+	Known	YES	0.0226463	0.00311486	0.0339616	0.82132	0.976944	0.19317	0.300821	0.264274	1	1	0.00132976	0.0480418	ETOH
FBgn0083040	snoRNA:Psi18S-1854c	X:17039243-17039382	-	Known	YES	0.00488044	0.171882	0.514609	0.208076	0.799442	0.57495	0.68157	0.653394	6.16845e-07	3.88667e-06	1.15972e-07	1.98376e-05	BOTH
FBgn0083042	snoRNA:Psi18S-1854a	X:17039936-17040074	-	Known	YES	2.30105e-05	0.925352	1	0.789088	0.971306	0.790006	0.851624	0.823437	6.07198e-23	2.40633e-21	2.80917e-05	0.00228736	BOTH
FBgn0083046	snoRNA:Psi18S-1389a	2R:17221439-17221597	+	Known	YES	0.0474263	1.66692e-05	0.00042727	0.690213	0.954829	0.114212	0.199298	0.389898	0.778035	1	3.74243e-06	0.000416462	ETOH
FBgn0083047	snoRNA:Psi18S-1377e	3R:26032698-26032834	-	Known	YES	9.96829e-05	0.845381	1	0.777313	0.969828	0.00120838	0.00400198	0.39688	1	1	7.5972e-07	0.000107972	ETOH
FBgn0083048	snoRNA:Psi18S-1377d	3R:26032878-26033013	-	Known	YES	0.00330698	0.260951	0.632471	0.701939	0.95814	0.07812	0.147201	0.429431	0.733757	1	2.5555e-07	4.00366e-05	ETOH
FBgn0083049	snoRNA:Psi18S-1377c	3R:26033044-26033180	-	Known	YES	0.00828098	0.0748944	0.318209	0.245955	0.818317	0.000882551	0.00300087	0.788036	5.35175e-17	1.13275e-15	7.7187e-07	0.000108733	BOTH
FBgn0083054	snoRNA:Psi18S-1347a	2R:14030307-14030443	+	Known	YES	0.0581088	1.76168e-06	5.72325e-05	0.920317	0.990437	0.0280865	0.0635234	0.482729	0.00132168	0.00436874	0.000112243	0.0071816	BOTH
FBgn0083057	snoRNA:Psi18S-110	3L:831870-832008	-	Known	YES	0.000460699	0.67501	0.956394	0.606039	0.942617	0.0256665	0.0589527	0.322622	0.876747	1	0.000151063	0.00914201	ETOH
FBgn0083058	snoRNA:Psi18S-1086	3L:833062-833209	-	Known	YES	5.96063e-06	0.961966	1	0.891803	0.986185	0.00404308	0.0119117	0.331198	1	1	3.00558e-05	0.00238787	ETOH
FBgn0083972	CG34136	2L:21096922-21098932	+	Known	YES	0.0121679	0.0306844	0.179118	0.882012	0.985514	0.0837916	0.155683	0.723691	1.41838e-12	1.83535e-11	2.66043e-06	0.000315181	BOTH
FBgn0085195	CG34166	2L:14743193-14743879	+	Known	YES	0.0187431	0.00721605	0.064559	0.402609	0.881778	1.5555e-05	6.74699e-05	0.880349	3.32613e-26	1.8648e-24	1.62109e-08	3.57568e-06	BOTH
FBgn0085227	CG34198	2R:15569951-15570482	-	Known	YES	0.0329383	0.000350789	0.00572865	0.458076	0.902646	1.08247e-13	9.09729e-13	0.536171	3.84817e-06	2.14351e-05	0.000498631	0.0234468	BOTH
FBgn0085237	CG34208	2R:18220631-18221010	+	Known	YES	0.0068958	0.104212	0.387864	0.644725	0.948199	5.16254e-14	4.46638e-13	0.486316	0.000132516	0.000551018	0.000672491	0.02913	BOTH
FBgn0085244	CG34215	2R:2718801-2719298	-	Known	YES	0.00627694	0.121164	0.423304	0.13524	0.748958	0.0106824	0.0279015	0.802801	3.66288e-13	5.04956e-12	1.4204e-11	6.18464e-09	BOTH
FBgn0085256	CG34227	2R:7135631-7136115	+	Known	YES	0.00942145	0.0573873	0.269433	0.181763	0.779905	3.38148e-06	1.56279e-05	0.799981	1.71209e-20	5.22304e-19	3.12726e-05	0.002467	BOTH
FBgn0085265	CG34236	2R:9492000-9493160	-	Known	YES	0.110592	2.28219e-11	2.13729e-09	0.934155	0.991352	4.23968e-06	1.93963e-05	0.663598	1.1097e-10	1.15043e-09	5.92616e-05	0.00420946	BOTH
FBgn0085297	CG34268	3L:500965-501400	+	Known	YES	0.0142251	0.0193916	0.131156	0.71843	0.960635	0.323366	0.44385	0.401268	0.0895486	0.183425	0.000127826	0.00799555	BOTH
FBgn0085313	CG34284	3R:14728060-14728655	-	Known	YES	0.000625158	0.625239	0.927786	0.824768	0.978118	0.0481444	0.0995317	0.741992	1.24094e-17	2.78294e-16	0.000654853	0.0285756	BOTH
FBgn0085320	CG34291	3R:22251012-22251503	-	Known	YES	0.254078	3.88441e-26	2.17054e-23	0.250517	0.822766	0.00437498	0.0127728	0.802471	4.26691e-15	7.33248e-14	1.33677e-09	3.9662e-07	BOTH
FBgn0085330	CG34301	3R:4599157-4599532	+	Known	YES	0	1	1	0.463414	0.904351	0.0108146	0.0281947	0.587953	1.63596e-08	1.29116e-07	0.00072293	0.0309154	BOTH
FBgn0085358	Diedel3	X:18944475-18947193	+	Known	YES	0.0527966	5.39058e-06	0.000157323	0.144116	0.754338	0.00845302	0.0227925	0.812765	1.94602e-19	5.27012e-18	7.60023e-07	0.000107972	BOTH
FBgn0085362	Vml	X:2169983-2171814	+	Known	YES	0.030764	0.0005551	0.00837949	0.29154	0.841553	0.00010031	0.000395573	0.397096	0.0140665	0.0362998	0.00133692	0.0481636	BOTH
FBgn0085423	GramD1B	2L:3358640-3373372	-	Known	YES	0.018653	0.00735827	0.0655421	0.850966	0.981934	0.339346	0.460057	0.619749	1.34377e-09	1.21731e-08	0.000391723	0.0194567	BOTH
FBgn0085426	Rgk3	2R:17142670-17168500	+	Known	YES	0.00636347	0.118622	0.418494	0.655472	0.950857	1.33662e-07	7.02166e-07	0.62472	3.78045e-09	3.22266e-08	0.000135256	0.00833588	BOTH
FBgn0085644	CR41423	U:2927697-2928954	+	Known	YES	1.11022e-16	1	1	0.32912	0.856731	0.967026	0.978204	0.365178	0.999999	1	4.50013e-06	0.000480497	ETOH
FBgn0086359	Invadolysin	3R:5970390-5984856	+	Known	YES	0.0063147	0.120048	0.421231	0.00841153	0.640933	9.74973e-05	0.000385117	0.639725	2.94186e-11	3.27137e-10	0.000935227	0.0374616	BOTH
FBgn0086603	snoRNA:Or-CD2	2R:4984535-4984674	+	Known	YES	0	1	1	0.97019	0.996328	0.261969	0.379141	0.391393	0.883755	1	2.2346e-06	0.000273429	ETOH
FBgn0086659	snoRNA:Psi18S-176	2R:19727434-19727587	-	Known	YES	2.47299e-05	0.922622	1	0.518639	0.921455	0.0874186	0.161153	0.412434	0.207871	0.373088	1.71768e-05	0.00151549	ETOH
FBgn0086662	snoRNA:Psi28S-3186	3R:1423737-1423879	-	Known	YES	0.0683011	2.04547e-07	8.47696e-06	0.757632	0.967049	0.22352	0.336228	0.313086	0.589561	0.852832	0.000622556	0.0278299	ETOH
FBgn0086670	snoRNA:Psi28S-2622	3L:1488906-1489045	+	Known	YES	0.0412304	6.12711e-05	0.0013101	0.412953	0.885813	0.0717196	0.137491	0.364585	0.438911	0.680102	7.56432e-05	0.00520511	ETOH
FBgn0086680	vvl	3L:6783258-6788041	+	Known	YES	0.013571	0.0224212	0.144834	0.0379488	0.670318	0	0	0.425669	0.00665524	0.0186112	0.000642389	0.0282272	BOTH
FBgn0086898	dgo	2R:6703542-6707389	-	Known	YES	0.0157168	0.0139568	0.104262	0.00344561	0.591391	0.000117642	0.000459813	0.853505	3.94746e-26	2.19117e-24	1.17381e-05	0.00108111	BOTH
FBgn0087012	5-HT2A	3R:438592-459026	+	Known	YES	0.00138887	0.466513	0.824023	0.184706	0.782091	1.2168e-13	1.01626e-12	0.46644	0.000458659	0.00168317	0.000753669	0.0319851	BOTH
FBgn0250757	CG42235	3R:21732744-21746768	+	Known	YES	0.000480713	0.668437	0.95273	0.882568	0.985514	1.75342e-09	1.05356e-08	0.694028	3.0012e-14	4.70413e-13	0.00069444	0.0299261	BOTH
FBgn0250836	CG8628	3L:7123974-7124605	+	Known	YES	0.113104	1.31548e-11	1.28583e-09	0.248594	0.820994	1.29898e-06	6.26067e-06	0.799965	1.18768e-17	2.67065e-16	3.29921e-07	5.05081e-05	BOTH
FBgn0250907	Cht10	2L:22892306-22918647	-	Known	YES	0.000350885	0.714436	0.978348	0.903305	0.988463	0.993333	0.995739	0.927476	5.73012e-40	1.12347e-37	5.09819e-06	0.000525929	BOTH
FBgn0259239	CG42337	3L:21176413-21186463	-	Known	YES	0.00919466	0.0604864	0.278422	0.514674	0.920575	0.787434	0.849917	0.627693	9.01046e-11	9.44633e-10	0.0011424	0.043322	BOTH
FBgn0259748	CG42397	3L:11966185-11966890	-	Known	YES	0.00570918	0.139425	0.458376	0.576204	0.936742	2.05169e-13	1.67677e-12	0.8872	3.08832e-24	1.3824e-22	3.07486e-11	1.22727e-08	BOTH
FBgn0259821	CG42402	3RHet:2374442-2448092	+	Known	YES	0	1	1	0.0928789	0.713763	4.67503e-10	2.92821e-09	0.777043	1.80559e-20	5.4933e-19	0.000554946	0.0255542	BOTH
FBgn0259823	CG42404	3R:11075816-11083487	+	Known	YES	0.00264142	0.315134	0.691677	0.0129287	0.640933	1.4362e-07	7.52353e-07	0.518346	1.73267e-05	8.58324e-05	0.00049104	0.023253	BOTH
FBgn0260011	NimC4	2L:14047582-14048863	+	Known	YES	0.0122164	0.0303515	0.177839	0.00759202	0.640933	3.39421e-08	1.85974e-07	0.534823	1.92685e-05	9.4599e-05	0.000158924	0.00954883	BOTH
FBgn0260396	CG42521	3L:10616166-10616676	-	Known	YES	0.000124086	0.827755	1	0.675398	0.953166	0.0281085	0.0635641	0.844647	0.00200185	0.00633051	1.88708e-34	9.03829e-31	BOTH
FBgn0260474	CG30002	2R:5591889-5593652	+	Known	YES	0.032143	0.000414868	0.00655789	0.511696	0.919226	3.55271e-13	2.84387e-12	0.584087	5.42444e-08	4.01557e-07	0.000429259	0.0208879	BOTH
FBgn0260484	HIP	X:3693183-3695607	+	Known	YES	0	1	1	0.0659095	0.687533	7.33857e-14	6.25533e-13	0.80133	1.80655e-22	6.85159e-21	0.00035819	0.0183708	BOTH
FBgn0260657	CG42540	3L:4556087-4592295	+	Known	YES	0.0108554	0.0412918	0.217867	0.065323	0.687533	1.1993e-07	6.32009e-07	0.413416	0.0157854	0.0402095	0.000519451	0.0242794	BOTH
FBgn0260943	Rbp6	3L:17051874-17231312	-	Known	YES	0.0291302	0.000784186	0.0110794	0.143665	0.754338	5.49625e-06	2.48969e-05	0.351999	0.328384	0.541232	0.000260658	0.0145409	BOTH
FBgn0261089	Sytalpha	2L:17592260-17604387	+	Known	YES	5.64939e-05	0.883282	1	0.121242	0.737422	0.000956513	0.00323235	0.452095	0.00251466	0.00775611	0.000379848	0.0191209	BOTH
FBgn0261290	CheA84a	3R:4029917-4030552	-	Known	YES	0.00283812	0.297741	0.674607	0.0504723	0.679301	0.418096	0.538469	0.478486	0.000153346	0.000628589	0.000928266	0.0372273	BOTH
FBgn0261453	scaRNA:MeU2-C41	3R:3747674-3747795	+	Known	YES	0.000414767	0.690758	0.965845	0.906244	0.989224	0.892594	0.926315	0.344563	0.367161	0.590484	0.000315818	0.0168338	ETOH
FBgn0261560	Thor	2L:3478434-3479612	+	Known	YES	0.0187425	0.00721708	0.064559	0.904869	0.989147	4.95191e-09	2.88892e-08	0.572425	2.65994e-06	1.52106e-05	5.57075e-05	0.00401657	BOTH
FBgn0261575	tobi	3R:21170483-21172643	-	Known	YES	0.0307931	0.000551689	0.00834302	0.96636	0.995342	0	0	0.746676	1.14181e-17	2.57613e-16	0.000431808	0.0209815	BOTH
FBgn0261611	CG42700	2R:8167276-8188300	+	Known	YES	0.00441881	0.193665	0.547517	0.580686	0.938062	9.53364e-11	6.2567e-10	0.649227	3.26605e-09	2.80843e-08	1.86126e-05	0.00162507	BOTH
FBgn0261612	CngA	2R:12130650-12147310	-	Known	YES	0.00442898	0.193152	0.546713	0.929235	0.990599	3.09587e-08	1.70184e-07	0.400848	0.0125386	0.0327936	0.00124249	0.0457768	BOTH
FBgn0261613	Oaz	2R:10323404-10353386	+	Known	YES	0.0119962	0.031893	0.183867	0.0674531	0.688197	0.0599038	0.118787	0.305917	1	1	2.25838e-05	0.00189766	ETOH
FBgn0261616	CG42705	X:7307902-7308695	+	Known	YES	0.0507029	8.37231e-06	0.000232945	0.440603	0.895391	0.00856349	0.0230552	0.85248	1.39938e-27	8.73688e-26	0.000102742	0.00668861	BOTH
FBgn0261675	Npc1b	X:20805896-20810530	+	Known	YES	0.00373961	0.231873	0.597595	0.547009	0.930305	5.8948e-10	3.66685e-09	0.633426	0.0888351	0.18213	1.99865e-14	1.19659e-11	BOTH
FBgn0261703	gce	X:15191799-15213107	+	Known	YES	0.00447565	0.190818	0.543362	0.669252	0.952868	0.170698	0.272836	0.44609	0.00147488	0.00482421	0.00085029	0.0349359	BOTH
FBgn0261802	CG42748	2L:22131221-22166221	+	Known	YES	0.000106704	0.840099	1	0.359384	0.87001	0.0617113	0.12168	0.636113	1.3299e-06	7.9706e-06	3.53998e-07	5.37035e-05	BOTH
FBgn0261848	CG42780	X:7225298-7226224	-	Known	YES	8.7116e-06	0.954028	1	0.822583	0.977354	0.814662	0.869949	0.875916	5.78492e-31	4.98589e-29	8.20571e-05	0.0055388	BOTH
FBgn0261989	CG42807	2R:9458100-9460264	-	Known	YES	0.0178973	0.00866942	0.0739028	0.569479	0.935901	7.79377e-14	6.6349e-13	0.821013	9.29522e-14	1.37711e-12	7.08184e-13	3.49166e-10	BOTH
FBgn0261999	CG42817	2L:16231475-16241527	+	Known	YES	0.0130706	0.025066	0.156468	0.751378	0.966803	0.000109568	0.00043001	0.559644	2.74387e-07	1.82491e-06	0.000716138	0.0307032	BOTH
FBgn0262003	CG42821	3R:13238799-13239361	+	Known	YES	0.0047593	0.177312	0.523858	0.288672	0.840422	0.00144716	0.00471864	0.812537	9.81517e-25	4.6611e-23	0.00124067	0.0457602	BOTH
FBgn0262007	CG42825	3L:10088854-10091215	-	Known	YES	0.0202355	0.00522738	0.050628	0.632631	0.946814	1.5838e-08	8.89603e-08	0.905704	6.63694e-30	5.11533e-28	2.09205e-09	5.74919e-07	BOTH
FBgn0262357	CG43055	2L:4411155-4411824	+	Known	YES	0.00617215	0.124325	0.429848	0.570723	0.935901	0	0	0.865962	2.06041e-10	2.06763e-09	1.73581e-24	2.53028e-21	BOTH
FBgn0262509	nrm	3L:22991472-23033400	+	Known	YES	0.00537744	0.151505	0.480448	0.609841	0.943101	3.65384e-05	0.000152183	0.805548	8.9025e-17	1.83636e-15	2.29044e-08	4.76967e-06	BOTH
FBgn0262531	CG43085	3L:17638586-17639837	-	Known	YES	0.0180739	0.00834314	0.0718891	0.778935	0.970529	0.0125287	0.0319495	0.699008	2.5674e-14	4.04498e-13	0.000497051	0.0234383	BOTH
FBgn0262572	CG43112	2R:7137099-7137438	+	Known	YES	0.000191477	0.786939	1	0.547455	0.930305	0	0	0.607342	1.29636e-09	1.17658e-08	0.000951443	0.037975	BOTH
FBgn0262679	CG43149	3L:53873-54751	-	Known	YES	0.00855945	0.0701506	0.305288	0.302569	0.845307	0.390278	0.511219	0.799179	1.02932e-12	1.35069e-11	1.06718e-11	4.70781e-09	BOTH
FBgn0262816	CG43187	2R:12268021-12273270	+	Known	YES	0.000104764	0.84154	1	0.883783	0.985514	4.80902e-05	0.00019692	0.550267	4.50298e-06	2.47535e-05	0.00017793	0.0104841	BOTH
FBgn0262825	lncRNA:CR43196	3R:13207851-13208489	-	Known	YES	0.00159981	0.43448	0.797791	0.237606	0.813008	8.59535e-13	6.61344e-12	0.718692	1.57041e-14	2.52645e-13	0.00010616	0.00687107	BOTH
FBgn0262869	Gfrl	3R:16204180-16310310	-	Known	YES	0.000356789	0.712149	0.977407	0.178279	0.77898	2.90878e-14	2.59215e-13	0.416961	0.0945426	0.192221	4.64829e-05	0.00344606	BOTH
FBgn0262976	lawc	X:8302041-8305691	-	Known	YES	0.00461883	0.183857	0.533018	0.0567827	0.683125	5.56589e-10	3.46547e-09	0.484954	0.00189795	0.00603096	6.7855e-05	0.00472968	BOTH
FBgn0262993	lncRNA:CR43301	3R:5163945-5165714	-	Known	YES	0.060045	1.17124e-06	4.00695e-05	0.185062	0.782091	0.0542542	0.109642	0.387272	0.0908	0.185602	0.000273519	0.0151325	BOTH
FBgn0263038	CG43333	2L:14163508-14180686	-	Known	YES	0.0307165	0.000560693	0.00845238	0.379805	0.875786	0.00187764	0.00597413	0.341265	0.234056	0.411265	0.000770072	0.0325166	BASELINE
FBgn0263080	CG43348	2L:1199412-1199924	+	Known	YES	0.0337389	0.000296309	0.00498964	0.939652	0.992025	1.8871e-11	1.3057e-10	0.501814	4.11451e-05	0.000189827	0.000680554	0.0294033	BOTH
FBgn0263081	CG43349	2L:1200205-1200663	+	Known	YES	0.00403369	0.214325	0.575776	0.308434	0.847953	0.00239904	0.00743676	0.691763	3.46148e-14	5.38778e-13	0.000773837	0.0325935	BOTH
FBgn0263235	Phae2	2L:12111110-12112256	+	Known	YES	0.0595903	1.28912e-06	4.35251e-05	0.596852	0.941087	0	0	0.867121	4.83747e-29	3.45077e-27	4.19092e-05	0.00316462	BOTH
FBgn0263316	Mrp4	3R:7394972-7401659	+	Known	YES	0.0227191	0.00306669	0.0335236	0.54391	0.929688	4.81511e-07	2.40906e-06	0.710416	8.40789e-15	1.40105e-13	0.000341801	0.017822	BOTH
FBgn0263336	lncRNA:CR43417	2R:12705024-12706745	-	Known	YES	0.00706958	0.0999321	0.377896	0.781384	0.970529	7.75757e-12	5.54527e-11	0.764612	8.97431e-19	2.27252e-17	0.000265319	0.0147763	BOTH
FBgn0263406	lncRNA:CR43452	3R:16503905-16504801	+	Known	YES	0.00421406	0.204343	0.561632	0.92605	0.990437	0.239268	0.354132	0.74923	1.24528e-16	2.53803e-15	8.21065e-05	0.0055388	BOTH
FBgn0263468	snoRNA:SC35-a	2L:12432798-12432950	-	Known	YES	0.0347845	0.000237719	0.00413816	0.654606	0.950488	0.00676469	0.0187702	0.523525	0.0747883	0.157139	1.867e-08	4.01249e-06	ETOH
FBgn0263475	snoRNA:CG16892-a	X:9168747-9168895	+	Known	YES	0.000925931	0.552191	0.882932	0.751612	0.966803	0.232702	0.346818	0.249268	1	1	0.000631265	0.0279583	ETOH
FBgn0263484	snoRNA:Pi4KIIalpha-a	3R:1385600-1385760	-	Known	YES	0.00593542	0.131805	0.4441	0.741175	0.964365	0.512221	0.626279	0.384862	0.744279	1	5.98719e-06	0.000600995	ETOH
FBgn0263748	CG43673	X:15673179-15674247	+	Known	YES	0.0177675	0.00891764	0.0754813	0.391053	0.881273	0	0	0.70175	1.6955e-14	2.72377e-13	0.000495789	0.0234383	BOTH
FBgn0263830	CG40486	X:22360692-22361927	-	Known	YES	0.0241764	0.00224615	0.0261391	0.135751	0.749691	3.72911e-11	2.52494e-10	0.720024	2.24059e-15	4.01069e-14	0.000299886	0.0162428	BOTH
FBgn0263834	CR43696	3R:18122592-18123266	+	Known	RARE	-1.11022e-16	1	1	0.400883	0.881742	0.319851	0.439926	0.745256	5.59765e-16	1.06875e-14	5.03355e-05	0.00369277	BASELINE
FBgn0263973	jv	3L:6556297-6582579	-	Known	YES	5.3856e-05	0.886021	1	0.664212	0.951888	0	0	0.753181	1.51558e-17	3.36955e-16	0.000186307	0.0108443	BOTH
FBgn0264272	mwh	3L:1200786-1232700	+	Known	YES	0.108304	3.7655e-11	3.38971e-09	0.650254	0.949254	7.06313e-08	3.78643e-07	0.816316	1.01913e-19	2.84498e-18	6.41961e-07	9.35784e-05	BOTH
FBgn0264273	Sema2b	2R:12274029-12319263	+	Known	YES	0.0701269	1.38906e-07	5.96302e-06	0.250851	0.822976	1.42901e-07	7.48705e-07	0.523936	3.74778e-06	2.09036e-05	0.00105495	0.0408893	BOTH
FBgn0264296	CG43774	2L:4008653-4009090	+	Known	YES	0.142362	1.94296e-14	3.07273e-12	0.328069	0.856255	0.401553	0.522681	0.839484	2.95846e-24	1.33139e-22	1.14818e-05	0.00106635	BOTH
FBgn0264488	CG43896	3L:11969211-11976864	+	Known	YES	0.00668778	0.109601	0.400153	0.911799	0.989679	0.447161	0.566618	0.507413	6.24685e-05	0.000277806	0.000353404	0.0182006	BOTH
FBgn0264489	CG43897	3L:9806947-9827445	+	Known	YES	0.00839853	0.0728514	0.312819	0.598686	0.941488	0.70348	0.785341	0.586947	2.16979e-08	1.68903e-07	0.000645462	0.0282512	BOTH
FBgn0264502	CG43901	X:10799800-10817469	+	Known	YES	0.00961871	0.054828	0.262163	0.387516	0.879468	9.57948e-09	5.46588e-08	0.527236	0.0257648	0.0621182	8.72598e-08	1.54791e-05	BOTH
FBgn0264574	Glut1	3L:914074-993788	+	Known	YES	0.00107233	0.522317	0.864102	0.0645601	0.686923	0.124783	0.213602	0.703027	5.88821e-08	4.33686e-07	2.41993e-09	6.54297e-07	BOTH
FBgn0264750	CG44008	2L:11841502-11842445	-	Known	YES	0.0588908	1.49397e-06	4.95924e-05	0.725618	0.962213	0.001248	0.00412425	0.743752	1.06026e-14	1.7408e-13	8.3557e-06	0.000807324	BOTH
FBgn0264775	CG44013	3R:11334618-11335639	-	Known	YES	0.00767777	0.0863905	0.34613	0.133102	0.748939	0.0283582	0.0640424	0.772266	1.00211e-14	1.64776e-13	1.56135e-07	2.55353e-05	BOTH
FBgn0264776	CG44014	3R:11333662-11334608	-	Known	YES	0.0654511	3.73923e-07	1.43767e-05	0.673563	0.953166	0.0893843	0.164064	0.816695	2.10519e-15	3.77639e-14	1.13779e-10	4.01545e-08	BOTH
FBgn0264907	CG44098	3R:576131-598919	-	Known	YES	3.70958e-05	0.905304	1	0.534344	0.926505	6.56262e-05	0.000264589	0.436251	0.0506321	0.112145	3.37766e-05	0.00262745	BASELINE
FBgn0264910	CR44101	2R:508623-510016	-	Known	YES	0.0141642	0.0196548	0.132376	0.825388	0.978118	2.0093e-06	9.5051e-06	0.935552	5.63422e-41	1.23463e-38	6.16357e-07	9.03801e-05	BOTH
FBgn0264979	CG4267	2L:2242378-2245274	+	Known	YES	0.0474573	1.65611e-05	0.000424823	0.310017	0.847953	7.32516e-05	0.000293848	0.826308	4.78262e-26	2.61577e-24	0.000924597	0.0372273	BOTH
FBgn0265185	CG44250	2R:8837909-8839798	-	Known	YES	0.00127327	0.485689	0.837251	0.181341	0.779905	0.504705	0.619532	0.678058	5.14516e-09	4.30501e-08	6.64442e-07	9.64361e-05	BOTH
FBgn0265186	CG44251	2R:8835853-8839798	-	Known	YES	0.000318539	0.727368	0.985323	0.0498571	0.679301	0.00220051	0.00687925	0.614691	8.585e-07	5.29585e-06	4.4082e-06	0.000476754	BOTH
FBgn0265295	asRNA:CR42871	3L:14027631-14029936	-	Known	YES	0.0710485	1.14238e-07	4.95711e-06	0.755687	0.966888	0.764501	0.832214	0.826046	1.92939e-25	9.84574e-24	0.00047832	0.022747	BOTH
FBgn0265377	lncRNA:CR44318	3R:4112891-4113420	+	Known	YES	0.175725	8.97026e-18	2.16364e-15	0.0409702	0.672606	0.000157609	0.00060599	0.80861	3.30485e-17	7.13928e-16	2.90685e-08	5.87096e-06	BOTH
FBgn0265487	mbl	2R:13104054-13266881	+	Known	YES	0.000683746	0.609476	0.918006	0.463341	0.904351	3.32079e-12	2.44668e-11	0.474245	0.000960124	0.00326836	0.00025521	0.014305	BOTH
FBgn0265901	asRNA:CR44690	X:2069850-2074849	-	Known	YES	0.00260449	0.318545	0.694937	0.8832	0.985514	1.66036e-06	7.91363e-06	0.601319	3.48422e-09	2.98379e-08	0.000781349	0.0327454	BOTH
FBgn0265959	rdgC	3L:20241180-20258654	+	Known	YES	0.0203356	0.00511582	0.049831	0.0895405	0.711719	0.0540243	0.109288	0.51435	0.00063556	0.00225868	2.7808e-05	0.0022795	BOTH
FBgn0266084	Fhos	3L:8746719-8791819	+	Known	YES	0.0130584	0.0251344	0.156778	0.857988	0.983074	0.0786314	0.147907	0.760669	2.73431e-19	7.29883e-18	0.000764394	0.0323176	BOTH
FBgn0266095	lncRNA:CR44832	X:5684985-5685569	-	Known	YES	0.00282646	0.298737	0.675153	0.50601	0.917386	0.463932	0.582525	0.838424	1.25373e-17	2.80974e-16	7.56473e-11	2.78706e-08	BOTH
FBgn0266354	CG45002	X:16863102-16960765	-	Known	YES	0.000323547	0.725319	0.983945	0.0739703	0.696501	9.72683e-10	5.97406e-09	0.413314	0.0217968	0.053588	0.000369952	0.0187646	BOTH
FBgn0266369	Mtp	2L:20919094-20922876	-	Known	YES	4.89088e-06	0.965545	1	0.105905	0.722409	0	0	0.43765	0.0305519	0.0722039	6.03044e-05	0.00425647	BOTH
FBgn0266405	lncRNA:CR45045	3R:13493299-13493547	+	Known	YES	0.0120757	0.0313273	0.181803	0.89899	0.98796	8.61784e-05	0.000342669	0.561069	4.13629e-06	2.29219e-05	8.96265e-05	0.00593855	BOTH
FBgn0266418	wake	3R:18465530-18509549	+	Known	YES	0.0932314	9.93784e-10	6.78586e-08	0.105479	0.722409	2.92996e-06	1.36352e-05	0.925177	1.01237e-32	1.04436e-30	5.37438e-11	2.02457e-08	BOTH
FBgn0266450	Kr-h1	2L:6082603-6096498	+	Known	YES	0.0040158	0.215347	0.57704	0.529528	0.924898	1.42109e-13	1.17835e-12	0.556363	3.09657e-07	2.0469e-06	0.000810702	0.0336808	BOTH
FBgn0266719	stac	3R:20882008-20890070	+	Known	YES	0.0177241	0.00900221	0.075967	0.738546	0.963859	8.2778e-07	4.05672e-06	0.6055	1.42182e-07	9.87964e-07	4.38193e-05	0.00329401	BOTH
FBgn0267191	lncRNA:CR45631	3R:12254026-12254698	+	Known	YES	0.0562363	2.61359e-06	8.18167e-05	0.154112	0.761659	2.40218e-05	0.000102146	0.660872	2.6575e-07	1.77239e-06	1.15406e-07	1.98376e-05	BOTH
FBgn0267252	Ggamma30A	2L:9256563-9302494	+	Known	YES	0.0260892	0.00149465	0.0188387	0.480335	0.90931	5.30837e-08	2.86868e-07	0.41001	0.00969178	0.0260115	0.00100713	0.0395386	BOTH
XLOC_000399		2L:2893129-2895120	+	Intronic	YES	0.00641863	0.117032	0.415308	0.590955	0.940253	0.684237	0.770216	0.53877	0.0793842	0.16563	3.7107e-09	9.35404e-07	BOTH
XLOC_000582		2L:4088865-4089173	+	Intronic	YES	0.000305166	0.73293	0.987907	0.687215	0.954565	0.403585	0.524468	0.269488	1	1	0.000506917	0.0237913	ETOH
XLOC_001109		2L:8235972-8236357	+	Intronic	RARE	0.00228706	0.349984	0.726244	0.0877431	0.709652	0.536306	0.647252	0.259106	1	1	0.000732713	0.0312938	BASELINE
XLOC_001131		2L:8421306-8426455	+	Intronic	YES	0.0380171	0.000120395	0.00231716	0.419271	0.888787	0.0376553	0.0812447	0.711751	1.71611e-13	2.46829e-12	4.62879e-05	0.003441	BOTH
XLOC_001138		2L:8506899-8507546	+	Intergenic	RARE	0.00208918	0.371735	0.746585	0.454961	0.901797	0.0597997	0.118601	0.263626	1	1	0.00127072	0.0463586	ETOH
XLOC_001180		2L:8713971-8717794	+	Anti-Sense	RARE	0.000124833	0.827245	1	0.080274	0.701738	2.02977e-06	9.59516e-06	0.301546	0.996198	1	0.000311908	0.0166784	ETOH
XLOC_001270		2L:9190585-9190826	+	Intronic	YES	4.00238e-05	0.901656	1	0.682936	0.953856	0.0926473	0.168695	0.265415	1	1	0.000393186	0.0195005	BASELINE
XLOC_001867		2L:13622299-13624883	+	Intronic	YES	0.000635167	0.622483	0.926058	0.434023	0.89271	0.918293	0.944559	0.41163	0.363146	0.585359	6.02435e-06	0.000602921	BOTH
XLOC_002063		2L:15212418-15213234	+	Intergenic	YES	0.00632245	0.11982	0.421046	0.255849	0.824716	0.79973	0.85926	0.369068	1	1	5.06875e-06	0.000524506	BOTH
XLOC_002157		2L:15838492-15838621	+	Intergenic	RARE	0.00401423	0.215436	0.577142	0.394723	0.881742	0.105585	0.187167	0.490948	1	1	1.20099e-10	4.15109e-08	BASELINE
XLOC_002254		2L:16409512-16410667	+	Intronic	YES	9.63885e-05	0.847926	1	0.996152	0.999671	3.33067e-16	3.60914e-15	0.508623	0.999999	1	2.34062e-11	9.68813e-09	BASELINE
XLOC_002512		2L:18353006-18355930	+	Intronic	YES	0.000607838	0.630074	0.930922	0.00406975	0.608945	0.76327	0.831256	0.340765	0.749635	1	8.55007e-05	0.00572172	BOTH
XLOC_003509		2L:3417451-3420609	-	Anti-Sense	YES	0.00410538	0.21029	0.57041	0.254395	0.823558	0.371988	0.492769	0.465283	0.0265446	0.0637936	1.17697e-05	0.00108111	BOTH
XLOC_003661		2L:4693345-4694275	-	Intergenic	YES	0.00444113	0.192541	0.545951	0.78909	0.971306	0.0934986	0.169913	0.312965	0.594958	0.858164	0.000614786	0.027667	BASELINE
XLOC_003904		2L:6793489-6794140	-	Intronic	YES	0.096282	5.1417e-10	3.65999e-08	0.683843	0.953856	7.34893e-05	0.000294731	0.509939	9.31136e-06	4.82134e-05	0.00124999	0.0458517	BOTH
XLOC_004070		2L:7912596-7913678	-	Intronic	YES	0.0138168	0.0212291	0.139887	0.162382	0.767515	0.0100887	0.0265474	0.342542	0.240707	0.421024	0.000694207	0.0299261	BOTH
XLOC_004115		2L:8264187-8264608	-	Intronic	YES	0.0143266	0.0189607	0.12939	0.922918	0.990437	0.00549865	0.0156459	0.243499	1	1	0.00114355	0.043322	ETOH
XLOC_004294		2L:9317698-9318597	-	Intergenic	RARE	0.0113692	0.036745	0.20228	0.522971	0.922613	8.09797e-06	3.6092e-05	0.258239	0.999999	1	0.000424904	0.0207362	BASELINE
XLOC_004753		2L:12941215-12941323	-	Intergenic	RARE	0	1	1	0.956858	0.994241	0.102113	0.182357	0.312207	1	1	0.00014547	0.00885149	BASELINE
XLOC_005533		2L:18538614-18539441	-	Intronic	YES	0.000520519	0.655829	0.944791	0.233646	0.813008	0.257937	0.374859	0.294863	0.970479	1	0.000467328	0.0224469	BOTH
XLOC_005833		2L:20911394-20911811	-	Intronic	YES	0.00556935	0.14438	0.4681	0.0360808	0.667923	0.498465	0.614053	0.26288	0.999999	1	0.00089196	0.036164	ETOH
XLOC_005923		2L:21697927-21698121	-	Intronic	RARE	1.88738e-15	1	1	0.397226	0.881742	0.000801896	0.00274809	0.725179	0.988688	1	6.71289e-27	1.3239e-23	BASELINE
XLOC_005924		2L:21698959-21699628	-	Intronic	RARE	0.000646676	0.619347	0.924266	0.352008	0.866682	0.0495208	0.101881	0.334908	0.870387	1	7.89683e-05	0.00537032	BOTH
XLOC_006048		2L:22560169-22560481	-	Intronic	YES	-4.44089e-16	1	1	0.104437	0.722409	0.831882	0.882851	0.408829	0.0299473	0.070952	0.000330924	0.0174174	BOTH
XLOC_006286		2R:111289-111474	+	Intergenic	RARE	0.00194137	0.389228	0.760691	0.0525634	0.679301	2.78816e-05	0.000117707	0.33776	1	1	2.81934e-05	0.00228872	BASELINE
XLOC_006432		2R:1260113-1262810	+	Intergenic	YES	0.0105953	0.043815	0.226451	0.490328	0.912726	0.000212412	0.000801711	0.6686	1.17117e-10	1.21004e-09	3.60847e-05	0.00278118	BOTH
XLOC_006448		2R:1385931-1388846	+	Intronic	YES	0.0654878	3.71027e-07	1.42982e-05	0.214377	0.804037	1.33637e-05	5.84265e-05	0.764231	5.44385e-20	1.57341e-18	0.00121077	0.0450235	BOTH
XLOC_006577		2R:2458181-2460206	+	Intronic	YES	2.46033e-05	0.922819	1	0.5627	0.934607	0.861476	0.90404	0.374122	0.184347	0.337852	0.000203925	0.0118083	BOTH
XLOC_006861		2R:5100160-5100373	+	Intergenic	RARE	0.00782389	0.0834417	0.340169	0.364111	0.871235	0.00088321	0.00300281	0.302232	1	1	0.000119561	0.00756326	BASELINE
XLOC_007238		2R:8435993-8439806	+	Intronic	YES	0.00309431	0.276886	0.652305	0.116718	0.731969	0.346987	0.467824	0.605084	9.07017e-08	6.4936e-07	6.39751e-05	0.00448722	BOTH
XLOC_007470		2R:10354846-10354975	+	Intergenic	RARE	2.22045e-16	1	1	0.364545	0.871333	0.0177741	0.0431148	0.380524	0.993062	1	3.10296e-06	0.000361226	BASELINE
XLOC_007778		2R:12632066-12635745	+	Anti-Sense	YES	0.00437816	0.195732	0.549934	0.385766	0.878723	0.0146671	0.0366064	0.287745	0.80037	1	0.00106081	0.0410216	BOTH
XLOC_007825		2R:12917407-12918128	+	Intronic	YES	0.00197493	0.385155	0.757338	0.203879	0.795948	0.15883	0.257902	0.278474	1	1	0.000619504	0.0277675	ETOH
XLOC_008076		2R:15118114-15118993	+	Intronic	YES	0.00228161	0.35056	0.726674	0.767757	0.968576	0.724689	0.801951	0.412889	0.489438	0.740083	2.75736e-06	0.000323237	ETOH
XLOC_008289		2R:16477301-16478188	+	Intronic	YES	0.00788783	0.0821855	0.33718	0.0311219	0.664932	0.121275	0.208947	0.377172	0.124458	0.242868	0.000306562	0.0164558	BOTH
XLOC_008422		2R:17400321-17400874	+	Intronic	YES	0.00128375	0.483898	0.835715	0.633795	0.946814	0.2362	0.350799	0.35554	0.999999	1	1.08741e-06	0.000148201	ETOH
XLOC_008455		2R:17640641-17640765	+	Intergenic	RARE	0	1	1	0.737776	0.963859	1.79381e-05	7.73961e-05	0.622237	0.963623	1	1.49753e-17	1.35697e-14	BASELINE
XLOC_008984		2R:928196-929095	-	Intergenic	YES	0.0270067	0.00122998	0.0161652	0.610854	0.943101	0.147614	0.243765	0.416703	0.0220456	0.0541347	0.000303458	0.0163307	BOTH
XLOC_009124		2R:2147911-2149262	-	Intergenic	YES	0.117223	5.31572e-12	5.6044e-10	0.620329	0.944431	0.139961	0.233591	0.403547	0.00964842	0.0259035	0.00139365	0.0498132	BOTH
XLOC_009509		2R:5549858-5550881	-	Intronic	YES	0.0153567	0.015106	0.110339	0.119296	0.735161	0.00159126	0.00513457	0.247637	1	1	0.00126609	0.0462398	BASELINE
XLOC_009708		2R:7322871-7323425	-	Intergenic	YES	2.84759e-05	0.916987	1	0.502689	0.916574	1.04009e-09	6.36821e-09	0.458709	0.811932	1	1.58516e-08	3.51958e-06	BASELINE
XLOC_010034		2R:9787185-9787812	-	Intronic	YES	2.1146e-05	0.928432	1	0.0693476	0.688979	0.254466	0.37099	0.734392	0.766717	1	3.64616e-27	8.14965e-24	BOTH
XLOC_010073		2R:10025942-10026834	-	Intronic	YES	0.000650742	0.618247	0.923665	0.883347	0.985514	0.885913	0.921662	0.38132	0.115582	0.227953	0.000272023	0.0150996	BOTH
XLOC_010579		2R:14326321-14326465	-	Intronic	YES	0.0208379	0.00459159	0.0459255	0.965532	0.995342	0.0684291	0.132429	0.259785	0.999999	1	0.00124388	0.0457768	ETOH
XLOC_010616		2R:14540382-14541929	-	Intronic	YES	0.004123	0.209312	0.568918	0.721998	0.961481	0.27084	0.388827	0.407779	0.681076	0.949456	1.61676e-06	0.000209852	ETOH
XLOC_010636		2R:14747399-14747564	-	Intergenic	RARE	0.000293838	0.737748	0.989934	0.501329	0.916194	1.58682e-06	7.5793e-06	0.334288	0.981463	1	5.68821e-05	0.00406628	BASELINE
XLOC_010820		2R:15836530-15837281	-	Intergenic	YES	0.00364083	0.23815	0.605382	0.723341	0.96168	8.11142e-09	4.65359e-08	0.668441	0.999999	1	5.64731e-23	6.76205e-20	BASELINE
XLOC_011600		2RHet:200093-200470	+	Intronic	YES	-3.33067e-16	1	1	0.129698	0.744469	0.0206301	0.048993	0.30992	1	1	0.000156365	0.00941197	ETOH
XLOC_011672		2RHet:1364378-1422812	+	Intergenic	RARE	1.11022e-16	1	1	0.641131	0.947423	0.041187	0.0875793	0.417969	0.967981	1	2.28454e-07	3.62037e-05	BASELINE
XLOC_011972		2RHet:1565356-1565655	-	Intronic	YES	0	1	1	0.252249	0.823558	0.0136758	0.0344708	0.449923	0.00506607	0.014542	0.000217968	0.0125134	BOTH
XLOC_012032		2RHet:2275267-2449713	-	Intergenic	YES	0	1	1	0.421009	0.889425	0.559082	0.667517	0.442277	0.00154649	0.00503587	0.000997952	0.0392243	BOTH
XLOC_012108		2RHet:3269675-3269823	-	Intergenic	YES	3.33067e-16	1	1	0.399219	0.881742	2.36841e-10	1.51199e-09	0.462682	0.988438	1	4.89743e-09	1.20733e-06	BASELINE
XLOC_012167		3L:666766-667267	+	Intergenic	RARE	0.00288049	0.294158	0.670398	0.0212107	0.654925	0.871952	0.911865	0.472576	0.38124	0.608521	5.04093e-08	9.49479e-06	BASELINE
XLOC_012432		3L:2880133-2880720	+	Intergenic	RARE	0.000551172	0.646509	0.940287	0.168002	0.770011	0.746744	0.81882	0.285016	0.784411	1	0.00125576	0.046013	ETOH
XLOC_012550		3L:3561013-3561762	+	Intronic	YES	1.11308e-05	0.948043	1	0.0227582	0.655419	0.0248281	0.0573019	0.378501	1	1	1.97063e-06	0.000248381	ETOH
XLOC_012695		3L:4414859-4417790	+	Intronic	YES	0.00110434	0.516171	0.85978	0.0436513	0.672871	1.02535e-05	4.52772e-05	0.74596	2.91121e-18	6.95186e-17	0.00095656	0.0379983	BOTH
XLOC_013020		3L:6880667-6880794	+	Intergenic	RARE	-2.22045e-16	1	1	0.377933	0.8748	0.0180683	0.0437357	0.359089	1	1	4.6028e-06	0.000485824	BASELINE
XLOC_014069		3L:13567686-13568055	+	Intronic	RARE	0.00403901	0.214023	0.575331	0.722817	0.961481	0.000235625	0.000883555	0.412941	0.315781	0.524509	7.42104e-06	0.000729634	BASELINE
XLOC_015562		3L:19704-27775	-	Anti-Sense	YES	0.593153	1.33211e-76	1.48872e-72	0.11129	0.725289	0.435008	0.554644	0.89027	1.19742e-20	3.71033e-19	1.6327e-15	1.21643e-12	BOTH
XLOC_015563		3L:28828-38527	-	Intergenic	YES	0.524244	1.3496e-63	7.54134e-60	0.0480208	0.679301	0.267192	0.384922	0.908393	4.10664e-32	4.00242e-30	3.99749e-08	7.74705e-06	BOTH
XLOC_015589		3L:390241-390573	-	Intronic	RARE	0.00319448	0.269234	0.643335	0.382612	0.877228	0.294127	0.413904	0.277821	0.999999	1	0.000755883	0.0319981	ETOH
XLOC_015592		3L:453493-454108	-	Intronic	YES	0.00714588	0.0981136	0.374269	0.425258	0.890729	8.82242e-06	3.91853e-05	0.294734	1	1	0.000283548	0.01561	ETOH
XLOC_015708		3L:1150157-1154187	-	Intronic	YES	0.00936028	0.0582062	0.271992	0.096241	0.715848	3.62748e-10	2.28918e-09	0.286512	0.897862	1	0.000852715	0.0349926	ETOH
XLOC_015782		3L:1903583-1904154	-	Intronic	YES	0.000176638	0.795171	1	0.3788	0.87522	0.025105	0.0578732	0.383285	0.202817	0.365563	0.000105249	0.00683855	ETOH
XLOC_016788		3L:9187319-9188527	-	Intergenic	RARE	0.000437591	0.682812	0.960906	0.466111	0.904715	0	0	0.289907	0.999999	1	0.0001329	0.0082209	BASELINE
XLOC_017108		3L:11492195-11492330	-	Intergenic	RARE	0	1	1	0.234413	0.813008	0.0597308	0.118518	0.588792	0.999999	1	1.9024e-15	1.38656e-12	BASELINE
XLOC_017120		3L:11542776-11543167	-	Intronic	YES	0.0236218	0.00252845	0.028736	0.582156	0.938062	0.534831	0.646193	0.330163	0.412097	0.647167	0.000532331	0.0247881	ETOH
XLOC_017137		3L:11688717-11689424	-	Intronic	YES	0.00278576	0.302247	0.679199	0.984377	0.997699	1.35069e-06	6.49775e-06	0.292108	0.830226	1	0.000796487	0.0332551	ETOH
XLOC_017263		3L:12546160-12549338	-	Intronic	YES	2.38953e-05	0.923935	1	0.886556	0.985863	0.657793	0.749043	0.281092	1	1	0.000416843	0.0204022	ETOH
XLOC_017338		3L:12976073-12977224	-	Intergenic	RARE	0.00120309	0.497972	0.846231	0.767146	0.968576	0.15314	0.250813	0.280474	0.999999	1	0.000300448	0.016247	BASELINE
XLOC_017565		3L:14570188-14570934	-	Intergenic	RARE	0.00107061	0.522652	0.864124	0.812602	0.97501	0.256879	0.373679	0.268106	1	1	0.000349772	0.0180602	ETOH
XLOC_017927		3L:16563685-16564045	-	Intronic	YES	0.00197011	0.385737	0.757756	0.920044	0.990437	0.152869	0.250444	0.499616	0.545272	0.803539	1.45099e-09	4.23021e-07	BOTH
XLOC_017991		3L:17106245-17108407	-	Intronic	YES	0.000880691	0.56207	0.889976	0.220459	0.807896	0.000129797	0.000504673	0.329897	0.270863	0.463305	0.00106559	0.0411589	ETOH
XLOC_018253		3L:18759435-18777518	-	Intronic	YES	0.000157196	0.806535	1	0.988146	0.997868	0.285343	0.404499	0.615565	2.91962e-10	2.88579e-09	0.0013185	0.0477378	BOTH
XLOC_018411		3L:20115890-20116017	-	Intergenic	RARE	2.22045e-16	1	1	0.37265	0.874249	0.011072	0.028762	0.510758	0.999999	1	2.53345e-11	1.03584e-08	BASELINE
XLOC_018867		3L:23595141-23599065	-	Intronic	RARE	0.00990056	0.0513784	0.250883	0.887828	0.985863	0.0153991	0.0381602	0.501911	8.8142e-05	0.000380719	0.000374155	0.0189205	BOTH
XLOC_018871		3L:23618476-23623638	-	Intronic	RARE	0.00323108	0.266504	0.63975	0.867733	0.983822	0.00262661	0.00806094	0.34797	0.2741	0.467934	0.000433501	0.0210333	BOTH
XLOC_018872		3L:23624770-23630798	-	Anti-Sense	YES	0.0353854	0.000209465	0.00371771	0.954831	0.994024	0.839938	0.888757	0.668141	3.80503e-13	5.23692e-12	0.0013242	0.0478925	BOTH
XLOC_018924		3L:23935852-23936004	-	Intronic	YES	0	1	1	0.571271	0.935904	7.82156e-06	3.49479e-05	0.441849	0.972263	1	3.26659e-08	6.48041e-06	BASELINE
XLOC_018936		3L:24013727-24013860	-	Intergenic	RARE	2.21255e-06	0.976822	1	0.284908	0.837832	0.000861385	0.00293575	0.700025	0.999998	1	2.76655e-24	3.86475e-21	BASELINE
XLOC_019099		3LHet:296823-296943	+	Intergenic	RARE	0	1	1	0.967065	0.99554	0.909881	0.938325	0.673966	1.39888e-06	8.34524e-06	3.8302e-09	9.51223e-07	BOTH
XLOC_019260		3LHet:1937463-1938237	+	Intergenic	YES	2.22045e-16	1	1	0.931328	0.990697	0.0971241	0.175285	0.507557	1.4658e-05	7.35969e-05	0.00104098	0.0404745	BOTH
XLOC_019263		3LHet:1947194-1948817	+	Intergenic	YES	0	1	1	0.969928	0.996328	0.416752	0.537246	0.548065	1.87864e-06	1.10287e-05	0.000394955	0.0195593	BOTH
XLOC_019290		3LHet:2128527-2131108	+	Intergenic	YES	0	1	1	0.183515	0.780318	0.567096	0.674478	0.596786	4.95669e-06	2.70041e-05	4.42726e-06	0.000477275	BOTH
XLOC_019333		3LHet:2507193-2509087	+	Intronic	YES	2.22045e-16	1	1	0.918764	0.990437	0.281296	0.400047	0.675161	3.45396e-11	3.80799e-10	4.61469e-05	0.00343815	BOTH
XLOC_019460		3LHet:1251988-1252550	-	Intronic	YES	0	1	1	0.143454	0.754338	0.0205662	0.0488794	0.380754	0.311245	0.518411	5.7877e-05	0.0041286	ETOH
XLOC_019462		3LHet:1254752-1255635	-	Intronic	YES	0	1	1	0.00712579	0.640933	0.106953	0.188973	0.519502	0.688277	0.957266	8.03047e-11	2.89503e-08	BOTH
XLOC_019507		3LHet:1697545-1698786	-	Intergenic	YES	1.11022e-16	1	1	0.736873	0.963859	0.779008	0.843267	0.33084	0.471209	0.718298	0.000402545	0.0198181	BOTH
XLOC_019955		3R:3467408-3467584	+	Intergenic	RARE	0.0077739	0.0844381	0.341877	0.0732254	0.696501	0.397302	0.518474	0.441592	0.112633	0.222972	7.04331e-06	0.000696581	BASELINE
XLOC_019967		3R:3498827-3500981	+	Intronic	YES	0.00454878	0.187225	0.538282	0.121438	0.737503	0.327927	0.448458	0.294701	0.725326	0.994073	0.000960218	0.0380086	BOTH
XLOC_020046		3R:4228781-4228903	+	Intronic	RARE	2.22045e-16	1	1	0.228173	0.812021	0.028083	0.0635234	0.907324	1	1	3.58129e-65	6.0035e-61	BASELINE
XLOC_020864		3R:11235258-11236486	+	Intronic	YES	0.00209792	0.370735	0.745584	0.270997	0.830468	0.0164834	0.0404493	0.430371	0.502687	0.755732	7.24465e-07	0.000104695	ETOH
XLOC_021009		3R:12611328-12611611	+	Intergenic	RARE	0.00189692	0.394717	0.764929	0.1165	0.731969	0.534644	0.646084	0.236097	1	1	0.00133298	0.0481063	ETOH
XLOC_021322		3R:15320330-15321377	+	Intronic	YES	0.00188068	0.396749	0.766373	0.975969	0.996774	0.64915	0.742224	0.319275	0.396826	0.628009	0.000958944	0.038003	ETOH
XLOC_021386		3R:15531285-15531419	+	Intergenic	RARE	0	1	1	0.795874	0.972599	0.0562909	0.112989	0.637633	0.961751	1	1.10051e-18	1.0852e-15	BASELINE
XLOC_021523		3R:16611105-16612666	+	Intronic	YES	0.00014179	0.816082	1	0.830288	0.978305	0.952866	0.968617	0.362842	0.959246	1	1.11239e-05	0.00103886	BOTH
XLOC_021587		3R:17263144-17263947	+	Intergenic	YES	0.000121246	0.829707	1	0.298024	0.844218	0	0	0.46214	0.698575	0.967536	2.02844e-08	4.30426e-06	BASELINE
XLOC_023640		3R:5852008-5852924	-	Intronic	YES	0.00553219	0.145729	0.470157	0.681123	0.953856	0.310427	0.431301	0.302551	0.604229	0.868137	0.00097475	0.0384929	ETOH
XLOC_023649		3R:5862517-5863363	-	Intronic	YES	0.000608918	0.62977	0.930842	0.459481	0.902896	0.0714873	0.137132	0.284634	1	1	0.000302341	0.0162968	ETOH
XLOC_024038		3R:9216248-9216838	-	Intronic	YES	0.0235435	0.00257109	0.0290728	0.599008	0.941667	0.000617139	0.00215841	0.410937	0.0320056	0.0751752	0.000273041	0.015131	BOTH
XLOC_024123		3R:9668440-9668673	-	Intergenic	RARE	0.000281773	0.742995	0.992789	0.390076	0.880633	0.24146	0.356494	0.301108	0.761267	1	0.000638297	0.0281211	ETOH
XLOC_024162		3R:9852722-9854673	-	Intronic	YES	0.0038869	0.222878	0.586462	0.35032	0.86623	0.0526283	0.107039	0.358128	0.954767	1	1.51642e-05	0.0013667	ETOH
XLOC_024245		3R:10388771-10389412	-	Intergenic	RARE	0.012837	0.0264091	0.162067	0.700173	0.957759	0.742649	0.815948	0.337649	0.999999	1	1.67192e-05	0.00147901	BASELINE
XLOC_024341		3R:11031488-11032054	-	Intronic	YES	0.00539512	0.150832	0.479741	0.663254	0.951712	9.2382e-07	4.51023e-06	0.432688	0.0592877	0.128689	3.40205e-05	0.00264029	BOTH
XLOC_024993		3R:16363186-16363691	-	Intronic	YES	0.00426428	0.201661	0.558449	0.0626624	0.685568	2.40607e-08	1.32941e-07	0.384967	0.974027	1	2.46327e-06	0.000296007	ETOH
XLOC_025141		3R:17644849-17645359	-	Intronic	YES	0.04972	1.02938e-05	0.000280018	0.184152	0.781172	3.82416e-06	1.75847e-05	0.300174	0.535298	0.792394	0.0013668	0.0490104	ETOH
XLOC_025185		3R:18074149-18074284	-	Intronic	RARE	1.11022e-16	1	1	0.575045	0.936742	0.0683434	0.132305	0.493972	0.995269	1	2.32068e-10	7.85913e-08	BASELINE
XLOC_025687		3R:21858926-21859484	-	Anti-Sense	RARE	0.0034207	0.252896	0.623466	0.10256	0.72093	0.0780273	0.147068	0.323128	1	1	2.09937e-05	0.00178644	ETOH
XLOC_027020		4:896434-896718	-	Intronic	YES	0.0139731	0.0205053	0.136378	0.608736	0.942939	3.81911e-06	1.75681e-05	0.284226	0.805834	1	0.0012247	0.0452739	ETOH
XLOC_027039		4:1060737-1064093	-	Intronic	YES	0.0262125	0.00145598	0.0184528	0.0353216	0.666368	0.0307267	0.0685232	0.578487	1.96554e-08	1.53574e-07	0.0011815	0.0442594	BOTH
XLOC_027158		U:1442872-1442997	+	Intergenic	RARE	2.22045e-16	1	1	0.106369	0.722409	0.0113588	0.0293888	0.767761	0.999999	1	1.53071e-32	5.13201e-29	BASELINE
XLOC_027205		U:2882395-2882775	+	Intergenic	RARE	1.11022e-16	1	1	0.775486	0.969554	0.18765	0.294139	0.703652	0.962349	1	1.66245e-24	2.53028e-21	BASELINE
XLOC_027232		U:3536823-3572874	+	Intergenic	YES	0	1	1	0.0843251	0.706207	0.0998248	0.179184	0.653284	5.11542e-10	4.90013e-09	5.07681e-05	0.00371638	BOTH
XLOC_027304		U:5563455-5566337	+	Intergenic	RARE	0	1	1	0.242552	0.817352	0.38928	0.510191	0.347004	0.68482	0.953591	7.57626e-05	0.00520511	BASELINE
XLOC_027318		U:5755682-5756242	+	Intergenic	RARE	2.10942e-15	1	1	0.938025	0.992025	0.0972224	0.175434	0.417214	0.701924	0.970449	7.44189e-07	0.000107083	BOTH
XLOC_027402		U:8077491-8078028	+	Anti-Sense	YES	0	1	1	0.529166	0.92474	0.257401	0.374291	0.452509	0.000654182	0.00231847	0.00118972	0.0444183	BASELINE
XLOC_027407		U:8221292-8221826	+	Intergenic	RARE	0	1	1	0.1544	0.761659	0.788649	0.85079	0.820641	8.57639e-22	3.00147e-20	8.33878e-06	0.000807324	BOTH
XLOC_027439		U:9486390-9487148	+	Anti-Sense	RARE	0	1	1	0.42317	0.890367	0.0463909	0.096472	0.432025	0.329028	0.542053	1.79111e-06	0.000229201	BASELINE
XLOC_027442		U:9645115-9645333	+	Intergenic	RARE	0	1	1	0.304937	0.846912	0.23761	0.352269	0.966376	1.33702e-32	1.36665e-30	6.15617e-30	1.71998e-26	BOTH
XLOC_027445		U:9743953-9958592	+	Intergenic	YES	0	1	1	0.166359	0.769325	0.348079	0.468862	0.467217	0.00240492	0.007459	0.000163495	0.00978838	BOTH
XLOC_027446		U:9762210-9762869	+	Intergenic	RARE	-2.22045e-16	1	1	0.980696	0.99736	0.0474864	0.098396	0.411026	0.216048	0.385298	1.75432e-05	0.00153972	BASELINE
XLOC_027527		U:1535029-1535761	-	Intergenic	YES	0	1	1	0.42511	0.890729	0.697407	0.780649	0.378779	0.999999	1	2.14588e-06	0.000265479	BASELINE
XLOC_027634		U:3533396-3536196	-	Anti-Sense	YES	0	1	1	0.18494	0.782091	0.00172317	0.00552614	0.735251	1.46552e-13	2.12061e-12	3.56749e-06	0.000405448	BOTH
XLOC_027655		U:4025673-4029911	-	Intergenic	YES	0	1	1	0.302622	0.845307	0.563895	0.671767	0.859539	9.98753e-29	6.84769e-27	0.000122469	0.0077036	BOTH
XLOC_027720		U:6366435-6366838	-	Intergenic	RARE	0	1	1	0.0679894	0.688197	0.44435	0.563802	0.318503	1	1	5.98978e-05	0.00423669	BASELINE
XLOC_027734		U:6597522-6599176	-	Intergenic	YES	-1.11022e-16	1	1	0.146001	0.755434	0.421754	0.541881	0.388358	0.744919	1	4.73421e-06	0.000497567	BASELINE
XLOC_027750		U:6941022-6942241	-	Intergenic	YES	-1.11022e-16	1	1	0.395307	0.881742	0.104505	0.185599	0.583305	1.89261e-08	1.48256e-07	0.000892046	0.036164	BOTH
XLOC_027759		U:7176407-7177295	-	Intergenic	YES	2.22045e-16	1	1	0.233864	0.813008	0.63065	0.727882	0.404553	0.026721	0.0641561	0.000473131	0.0226286	BASELINE
XLOC_027783		U:7785342-7786308	-	Anti-Sense	RARE	0	1	1	0.581083	0.938062	0.0537637	0.108859	0.306824	0.999999	1	0.000112017	0.0071816	BASELINE
XLOC_027786		U:7995983-7997654	-	Intergenic	RARE	0	1	1	0.764674	0.968455	0.50894	0.623288	0.284906	1	1	0.000407997	0.0200571	BASELINE
XLOC_027787		U:8043772-8044733	-	Anti-Sense	RARE	0	1	1	0.250489	0.822756	0.645955	0.739744	0.369438	1	1	1.86045e-06	0.00023627	BASELINE
XLOC_027790		U:8117963-8119339	-	Intergenic	YES	-1.11022e-16	1	1	0.445877	0.89784	0.667505	0.756435	0.379145	0.177951	0.328254	0.000163398	0.00978838	BOTH
XLOC_027834		U:9588056-9588411	-	Intergenic	RARE	1.11022e-16	1	1	0.632117	0.946814	0.616568	0.716263	0.348053	1	1	5.70294e-06	0.000575911	BOTH
XLOC_027839		U:9890966-9946235	-	Intergenic	RARE	0	1	1	0.2151	0.804514	0.0124687	0.0318181	0.467051	1	1	2.80134e-09	7.45401e-07	BASELINE
XLOC_027920		Uextra:693731-695063	+	Intergenic	YES	0	1	1	0.265193	0.829235	0.84076	0.88937	0.878238	3.05641e-29	2.23251e-27	4.45572e-06	0.000477275	BOTH
XLOC_027929		Uextra:863683-864943	+	Intergenic	RARE	-2.22045e-16	1	1	0.993426	0.99885	0.000945004	0.00319701	0.447028	0.00230993	0.00719617	0.000544504	0.0251454	BOTH
XLOC_027941		Uextra:1047860-1048391	+	Intergenic	RARE	0	1	1	0.289716	0.840935	0.353628	0.474467	0.529129	0.000262773	0.00102109	2.30661e-05	0.00193332	BASELINE
XLOC_027969		Uextra:1833699-1833824	+	Intergenic	RARE	1.11022e-16	1	1	0.458808	0.902896	0.0221502	0.0520133	0.712309	0.981725	1	1.80826e-25	3.03127e-22	BASELINE
XLOC_027990		Uextra:2293770-2294779	+	Intergenic	RARE	0	1	1	0.402632	0.881778	0.725808	0.802844	0.381224	1	1	1.78909e-06	0.000229201	ETOH
XLOC_028070		Uextra:6307971-6308782	+	Intergenic	YES	2.22045e-16	1	1	0.0869173	0.708008	0.740772	0.814692	0.267184	0.999999	1	0.000497775	0.0234394	BASELINE
XLOC_028086		Uextra:7150438-7150572	+	Intergenic	RARE	1.11022e-16	1	1	0.733779	0.963582	0.107879	0.190269	0.536935	0.963771	1	2.39894e-12	1.11707e-09	BASELINE
XLOC_028126		Uextra:9270789-9271261	+	Intergenic	RARE	2.22045e-16	1	1	0.636067	0.946814	0.998002	0.999045	0.395073	1	1	5.09171e-07	7.58711e-05	BASELINE
XLOC_028180		Uextra:15593173-15593708	+	Intergenic	YES	-2.22045e-16	1	1	0.569926	0.935901	0.0525843	0.106995	0.399828	0.0915867	0.187017	0.000134546	0.0083074	BASELINE
XLOC_028188		Uextra:16390813-16391303	+	Intergenic	YES	0	1	1	0.158653	0.764763	0.97335	0.982359	0.54947	0.999999	1	1.07582e-13	5.91293e-11	BOTH
XLOC_028200		Uextra:17423271-17595087	+	Intergenic	YES	1.11022e-16	1	1	0.893215	0.98671	0.787529	0.849993	0.867859	1.75893e-28	1.18417e-26	1.66315e-05	0.00147515	BOTH
XLOC_028229		Uextra:20241327-20241566	+	Intergenic	YES	0	1	1	0.400848	0.881742	0.319814	0.439926	0.996482	0.988231	1	6.09701e-198	2.04415e-193	ETOH
XLOC_028251		Uextra:23507821-23507946	+	Intergenic	RARE	0	1	1	0.936689	0.991862	0.000727648	0.00251162	0.588645	0.959241	1	2.77127e-15	1.97686e-12	BASELINE
XLOC_028257		Uextra:23990858-23991039	+	Intergenic	YES	-1.11022e-16	1	1	0.825539	0.978118	0.390787	0.511745	0.336391	1	1	2.05052e-05	0.0017673	BOTH
XLOC_028268		Uextra:25235694-25235830	+	Intergenic	RARE	2.22045e-16	1	1	0.562626	0.934572	0.0798038	0.149684	0.388111	0.181	0.332806	9.58514e-05	0.00626435	BASELINE
XLOC_028293		Uextra:27409517-27409749	+	Intergenic	YES	0	1	1	0.775112	0.969554	0.471817	0.589921	0.48264	0.999999	1	5.5294e-10	1.76556e-07	BASELINE
XLOC_028395		Uextra:956117-956705	-	Intergenic	RARE	-1.11022e-16	1	1	0.263064	0.828843	0.0798105	0.149688	0.421619	0.139277	0.267518	1.88943e-05	0.00164111	BOTH
XLOC_028422		Uextra:1887628-1887913	-	Intergenic	YES	2.22045e-16	1	1	0.104828	0.722409	0.0553164	0.111357	0.378663	1	1	2.67709e-06	0.000316038	ETOH
XLOC_028480		Uextra:3718607-3719038	-	Intergenic	RARE	0	1	1	0.585373	0.938935	0.418864	0.538953	0.511712	0.999999	1	2.66363e-11	1.07595e-08	BASELINE
XLOC_028506		Uextra:5113759-5114124	-	Intergenic	RARE	0	1	1	0.432211	0.892177	0.472428	0.590478	0.499209	0.00346878	0.0103542	1.32659e-05	0.00120533	BOTH
XLOC_028510		Uextra:5171269-5171404	-	Intergenic	RARE	0	1	1	0.05938	0.685423	0.0259715	0.0595431	0.406291	0.999999	1	3.20725e-07	4.95528e-05	BASELINE
XLOC_028513		Uextra:5464470-5465214	-	Intergenic	RARE	2.22045e-16	1	1	0.800627	0.973149	0.183904	0.289377	0.686443	0.961621	1	8.0453e-23	9.3012e-20	ETOH
XLOC_028535		Uextra:6837052-6837183	-	Intergenic	RARE	0	1	1	0.367088	0.8722	0.0686634	0.13281	0.475535	0.992702	1	1.44897e-09	4.23021e-07	BASELINE
XLOC_028544		Uextra:7095683-7096389	-	Intergenic	RARE	-1.11022e-16	1	1	0.529948	0.925127	0.120024	0.20726	0.399615	0.999999	1	4.10155e-07	6.19427e-05	BASELINE
XLOC_028546		Uextra:7309128-7309237	-	Intergenic	RARE	1.11022e-16	1	1	0.606255	0.942617	0.0017678	0.00565573	0.879009	0.969987	1	5.8358e-55	6.52189e-51	BASELINE
XLOC_028549		Uextra:7434859-7434963	-	Intergenic	RARE	0	1	1	0.174211	0.773863	0.108233	0.190732	0.554961	0.999999	1	1.7391e-13	9.25505e-11	BASELINE
XLOC_028552		Uextra:7494338-7494473	-	Intergenic	RARE	-2.22045e-16	1	1	0.401043	0.881742	0.205056	0.31474	0.805528	0.98821	1	3.62534e-38	2.02578e-34	BASELINE
XLOC_028602		Uextra:11675783-11675911	-	Intergenic	RARE	0	1	1	0.933706	0.991259	0.0207543	0.0492356	0.295497	0.959266	1	0.000467992	0.0224469	BASELINE
XLOC_028604		Uextra:11909947-11910071	-	Intergenic	RARE	0	1	1	0.229205	0.812419	0.0373954	0.080814	0.619419	0.999998	1	1.6637e-17	1.46786e-14	BASELINE
XLOC_028605		Uextra:11988046-11988204	-	Intergenic	RARE	-2.22045e-16	1	1	0.755403	0.966888	0.142556	0.236964	0.690191	2.03399e-07	1.38352e-06	3.77423e-09	9.44318e-07	BOTH
XLOC_028625		Uextra:13460537-13461081	-	Intergenic	RARE	0	1	1	0.105201	0.722409	0.251691	0.367632	0.367394	0.999999	1	4.06417e-06	0.000443842	BASELINE
XLOC_028642		Uextra:15938735-15939026	-	Intergenic	RARE	-2.22045e-16	1	1	0.424961	0.890729	0.798223	0.858025	0.375144	1	1	2.71849e-06	0.000319799	BASELINE
XLOC_028644		Uextra:16050098-16050665	-	Intergenic	RARE	0	1	1	0.263358	0.828843	0.918849	0.944955	0.56177	0.999999	1	4.58879e-14	2.6076e-11	BASELINE
XLOC_028645		Uextra:16107909-16108040	-	Intergenic	RARE	-1.11022e-16	1	1	0.400895	0.881742	0.0759337	0.144021	0.544186	0.988229	1	8.72864e-13	4.24123e-10	BASELINE
XLOC_028680		Uextra:20354057-20354398	-	Intergenic	YES	2.9976e-15	1	1	0.456171	0.902328	0.196235	0.304406	0.837378	5.71932e-19	1.47388e-17	1.75249e-09	4.93744e-07	BOTH
XLOC_028683		Uextra:20525678-20526329	-	Intergenic	YES	-2.22045e-16	1	1	0.628793	0.945963	0.232195	0.346339	0.446028	0.00437653	0.0127604	0.000315527	0.0168338	BASELINE
XLOC_028687		Uextra:21021362-21021564	-	Intergenic	YES	0	1	1	0.261576	0.827972	0.633809	0.730092	0.690479	0.999999	1	1.44834e-23	1.86764e-20	ETOH
XLOC_028727		Uextra:25435780-25436098	-	Intergenic	YES	0	1	1	0.275053	0.832681	0.0187413	0.0451635	0.270785	0.999999	1	0.000673562	0.0291387	BASELINE
XLOC_029027		X:3161334-3164848	+	Intronic	YES	9.05316e-05	0.852564	1	0.576004	0.936742	6.92188e-09	3.99301e-08	0.345021	0.377867	0.604195	0.000293023	0.0160003	BOTH
XLOC_029061		X:3576141-3577109	+	Intronic	YES	0.00811205	0.0779385	0.326014	0.922646	0.990437	0.34637	0.467142	0.327795	0.296403	0.49837	0.00102624	0.0399652	BOTH
XLOC_029170		X:4630923-4640119	+	Intergenic	YES	0.0135933	0.0223102	0.144261	0.507277	0.917714	6.00581e-06	2.71245e-05	0.442562	0.00126302	0.00419051	0.0011652	0.0438448	BOTH
XLOC_029584		X:8931394-8933597	+	Anti-Sense	YES	2.55386e-05	0.921371	1	0.0530195	0.679814	0.904687	0.934537	0.314935	0.447775	0.690867	0.000955276	0.0379983	BOTH
XLOC_030418		X:17658803-17659286	+	Intergenic	RARE	0.000915321	0.554478	0.88474	0.9169	0.990291	0.140754	0.234679	0.563231	0.999999	1	4.13724e-14	2.39154e-11	ETOH
XLOC_030613		X:19605248-19605437	+	Intronic	YES	0	1	1	0.218606	0.806151	0.698627	0.781551	0.840319	1.32579e-13	1.92924e-12	1.60749e-15	1.21643e-12	BOTH
XLOC_030734		X:21663066-21663447	+	Intergenic	YES	0.256261	2.2099e-26	1.25579e-23	0.689046	0.954726	0.149017	0.245512	0.539455	0.00106755	0.00360187	2.30987e-06	0.000281414	BOTH
XLOC_030961		X:2511415-2511543	-	Intergenic	RARE	0.000162619	0.803293	1	0.0838193	0.7049	0.0432329	0.0912178	0.455143	0.999999	1	6.27765e-09	1.51782e-06	BASELINE
XLOC_031224		X:6056108-6058482	-	Intronic	YES	0.00519892	0.158491	0.492651	0.580611	0.938062	0.236936	0.351484	0.328069	0.481143	0.729988	0.000444493	0.0214734	ETOH
XLOC_031447		X:8457193-8459806	-	Anti-Sense	YES	0.0217118	0.00380558	0.0396084	0.900055	0.9881	0.0902713	0.165284	0.72523	2.2354e-10	2.2372e-09	2.85501e-08	5.8012e-06	BOTH
XLOC_031696		X:10418257-10419091	-	Intronic	YES	0.000517003	0.656919	0.945655	0.0891267	0.711416	0.67818	0.765377	0.2391	1	1	0.00104552	0.0405707	ETOH
XLOC_031845		X:12190290-12190481	-	Intronic	RARE	0.000303362	0.73369	0.988014	0.634513	0.946814	0.309699	0.430486	0.237796	1	1	0.000871799	0.0356449	BASELINE
XLOC_032094		X:14919068-14942481	-	Anti-Sense	YES	1.19227e-05	0.946229	1	0.958112	0.994471	0.0307899	0.0686505	0.757085	5.71422e-19	1.47388e-17	0.000749101	0.0318316	BOTH
XLOC_032543		X:19281604-19292786	-	Anti-Sense	RARE	0.0138299	0.0211675	0.139591	0.162117	0.767515	0.00778288	0.0212126	0.47629	0.00463588	0.0134383	4.65614e-05	0.00344606	BOTH
XLOC_032549		X:19419735-19420728	-	Anti-Sense	YES	0.0268361	0.00127534	0.016644	0.474812	0.906894	3.08287e-12	2.28142e-11	0.402969	1	1	2.2279e-07	3.57391e-05	BASELINE

## Sheet: B. Male LxT
FlyBase Gene ID	Gene Symbol	Gene Locus	Gene Strand	TYPE	Expressed in DGRP	% Variance Explained by Alignment Bias	Alignment Bias Effect P-value	Alignment Bias Effect FDR	Wolbachia Effect P-value	Wolbachia Effect FDR	Treatment Effect P-value	Treatment Effect FDR	H2	Line Effect P-value	Line Effect FDR	Treatment by Line Effect P-value	Treatment by Line Effect FDR	Significant Treatment
FBgn0000078	Amy-d	2R:13012269-13013874	+	Known	YES	0.00454251	0.18753	0.407641	0.318432	0.914401	0	0	0.874425	1.49524e-30	3.41566e-29	6.62303e-05	0.00449296	BOTH
FBgn0000277	CecA2	3R:26037878-26038290	+	Known	YES	0.00964728	0.0544675	0.16702	0.255672	0.898166	0.00124844	0.00423531	0.771061	8.76944e-13	3.49155e-12	3.63785e-09	7.10226e-07	BOTH
FBgn0000370	crc	2L:21310866-21319527	+	Known	YES	0.0114268	0.0362683	0.122376	0.608069	0.959067	9.97155e-07	5.53995e-06	0.713949	0.0077475	0.0134833	4.23052e-18	2.73194e-15	BOTH
FBgn0000395	cv-2	2R:17242520-17266969	-	Known	YES	0.00827763	0.0749535	0.211668	0.0572044	0.803469	2.17493e-13	2.57463e-12	0.779504	1.50444e-16	8.16934e-16	1.35241e-06	0.000152909	BOTH
FBgn0000473	Cyp6a2	2R:2667254-2668996	-	Known	YES	0.0191375	0.00662572	0.0312444	0.139308	0.856759	0.000816021	0.00288131	0.967674	2.13614e-57	9.82625e-55	1.42079e-05	0.00122021	BOTH
FBgn0000504	dsx	3R:3750045-3793130	-	Known	YES	0.00618406	0.123961	0.306254	0.387551	0.929861	8.25505e-10	6.62852e-09	0.718263	4.24434e-16	2.21175e-15	0.000884598	0.0384777	BOTH
FBgn0000557	eEF1alpha2	3R:27564190-27569028	+	Known	YES	0.0269888	0.00123465	0.00753018	0.561746	0.952665	4.44089e-16	6.85785e-15	0.837228	4.00878e-25	5.31025e-24	5.76935e-05	0.00401107	BOTH
FBgn0000594	Est-P	3L:12183833-12185628	+	Known	YES	0.00766274	0.0867003	0.236046	0.561529	0.952665	0.000759725	0.00270071	0.828366	1.03071e-17	6.20607e-17	1.13673e-09	2.4159e-07	BOTH
FBgn0001114	Glt	2L:8672698-8676804	+	Known	YES	0.00114443	0.508647	0.76586	0.0435505	0.777096	0	0	0.513424	2.18622e-05	4.91419e-05	0.000554103	0.0267723	BOTH
FBgn0001234	lncRNA:Hsromega	3R:17121849-17143558	+	Known	YES	0.0102229	0.047712	0.150906	0.00647561	0.708141	0.0125482	0.0326691	0.773	1.22084e-19	8.88124e-19	0.000313101	0.016428	BOTH
FBgn0002564	Lsp1gamma	3L:66430-68995	+	Known	YES	0.000574214	0.639707	0.872688	0.812115	0.982269	0.513742	0.634234	0.77795	1.12757e-18	7.42137e-18	4.70199e-05	0.00337378	BOTH
FBgn0002565	Lsp2	3L:12122493-12124969	+	Known	YES	0.0174384	0.00957956	0.0423711	0.698228	0.970217	0.12982	0.223928	0.765922	1.51646e-19	1.0937e-18	0.000603649	0.0283504	BOTH
FBgn0002645	Map205	3R:27881001-27894163	-	Known	YES	0.00583937	0.134982	0.324982	0.24314	0.894987	0.0026845	0.00843148	0.962515	0.000621013	0.0012256	2.22033e-84	3.72793e-80	BOTH
FBgn0002842	sa	3L:21398525-21399838	-	Known	YES	0.0196935	0.00587566	0.0282752	0.503173	0.946647	0.000581936	0.00211712	0.783582	3.98998e-21	3.41447e-20	0.00058692	0.027798	BOTH
FBgn0002869	MtnB	3R:16328824-16329468	-	Known	YES	0.00777528	0.0844105	0.231049	0.647048	0.964583	1.14763e-10	1.00938e-09	0.817582	8.29125e-21	6.85426e-20	3.07105e-06	0.000319275	BOTH
FBgn0002939	ninaD	2L:18081628-18083608	+	Known	YES	0.0418244	5.40819e-05	0.000483512	0.525519	0.947915	5.55112e-15	7.76185e-14	0.841425	1.93055e-26	2.96559e-25	0.000159179	0.00939406	BOTH
FBgn0002973	numb	2L:9437469-9464184	+	Known	YES	0.075833	4.13233e-08	7.13438e-07	0.619989	0.961699	0.00605659	0.0173019	0.748422	6.1418e-17	3.44771e-16	0.000137639	0.00832777	BOTH
FBgn0003134	Pp1alpha-96A	3R:20343992-20348053	+	Known	YES	0.0113428	0.0369653	0.124155	0.271307	0.90406	1.3662e-07	8.52528e-07	0.700273	1.55447e-11	5.62188e-11	6.43684e-06	0.000602086	BOTH
FBgn0003248	Rh2	3R:14725145-14726741	+	Known	YES	0.000778941	0.585591	0.830763	0.783444	0.979235	0.00576906	0.0165793	0.931165	8.77285e-42	6.13734e-40	1.4248e-05	0.00122053	BOTH
FBgn0003328	scb	2R:11136289-11146003	+	Known	YES	0.0338724	0.000288088	0.00212756	0.222473	0.892293	0.33156	0.460192	0.791544	1.71366e-14	7.79635e-14	3.2696e-09	6.45842e-07	BOTH
FBgn0003961	Uro	2L:7780085-7781415	+	Known	YES	0.00161849	0.431809	0.697223	0.594929	0.957063	3.73612e-12	3.88566e-11	0.758578	4.55582e-19	3.12405e-18	0.000725037	0.0330798	BOTH
FBgn0004174	Mst84Dc	3R:3189976-3190395	-	Known	YES	3.48166e-05	0.908246	1	0.688089	0.968964	0.155205	0.257425	0.981711	4.65138e-22	4.45757e-21	1.56047e-68	1.31002e-64	BOTH
FBgn0004228	mex1	3L:15510524-15512692	-	Known	YES	0.0177216	0.0090071	0.0403708	0.229167	0.894606	0	0	0.604007	2.68494e-05	5.9927e-05	4.14919e-07	5.35884e-05	BOTH
FBgn0004240	DptA	2R:14753270-14753765	+	Known	YES	0.000277156	0.745036	0.947793	0.588864	0.956711	3.39947e-05	0.000153211	0.58207	2.46888e-06	6.00501e-06	2.81924e-05	0.00219708	BOTH
FBgn0004394	pdm2	2L:12657165-12686306	+	Known	YES	0.00666102	0.110316	0.281791	0.705034	0.970886	0.0471392	0.0991916	0.566002	8.20458e-07	2.07026e-06	0.000219682	0.0123676	BOTH
FBgn0004425	LysB	3L:1207371-1207981	+	Known	YES	0.127525	5.42245e-13	1.94329e-11	0.956939	0.997899	5.70056e-05	0.000248254	0.893714	4.09667e-31	9.94695e-30	1.12941e-06	0.000130329	BOTH
FBgn0004427	LysD	3L:1210717-1211196	-	Known	YES	0.285387	1.01784e-29	2.01053e-27	0.486007	0.944258	0.0201537	0.0491002	0.93646	1.8823e-41	1.28471e-39	8.18718e-07	9.88941e-05	BOTH
FBgn0004431	LysX	3L:1194739-1195302	-	Known	YES	0.0240492	0.00230795	0.0128207	0.481276	0.943323	0.000122438	0.000506154	0.745815	7.60476e-18	4.63295e-17	0.000586215	0.027798	BOTH
FBgn0004509	Fur1	3R:21173153-21298780	-	Known	YES	0.0465889	1.9876e-05	0.00019817	0.38824	0.929861	0	0	0.637366	6.04278e-11	2.0902e-10	0.000729068	0.0332186	BOTH
FBgn0005664	Crys	2L:11944129-11947131	+	Known	YES	0.0701619	1.37879e-07	2.18086e-06	0.317755	0.914401	0.398381	0.527025	0.878995	3.33408e-26	4.99814e-25	2.44255e-08	4.04044e-06	BOTH
FBgn0010038	GstD2	3R:8197693-8198426	+	Known	YES	0.000156012	0.807251	0.987635	0.227806	0.894606	9.5921e-06	4.67382e-05	0.874164	1.17647e-21	1.07763e-20	1.20029e-11	3.30374e-09	BOTH
FBgn0010052	Jhe	2R:12007298-12010278	+	Known	YES	3.61557e-06	0.970374	1	0.987319	0.999388	5.73954e-10	4.69971e-09	0.624062	8.04033e-09	2.36899e-08	8.37671e-05	0.00550469	BOTH
FBgn0010222	Nmdmc	3R:4868230-4876277	-	Known	YES	0.0143313	0.0189408	0.0737257	0.726623	0.973383	1.41963e-05	6.76507e-05	0.815138	2.07427e-23	2.27553e-22	0.000183957	0.0106321	BOTH
FBgn0010241	Mdr50	2R:10134471-10140102	+	Known	YES	0.012389	0.0291973	0.10378	0.147236	0.860501	0.0645778	0.128299	0.96225	3.77095e-55	1.3764e-52	4.90901e-05	0.00349247	BOTH
FBgn0010246	Myo61F	3L:1318480-1329617	+	Known	YES	0.000410111	0.692409	0.911808	0.11977	0.851893	5.46417e-09	4.00968e-08	0.672537	2.86496e-07	7.49381e-07	2.6315e-08	4.33166e-06	BOTH
FBgn0010381	Drs	3L:3369556-3369942	+	Known	YES	0.0202921	0.00516401	0.0253372	0.760257	0.977318	6.76057e-09	4.90737e-08	0.672232	2.77396e-12	1.06384e-11	0.00030815	0.0162189	BOTH
FBgn0010388	Dro	2R:10633466-10634219	+	Known	YES	0.00576625	0.137457	0.329513	0.363492	0.925635	1.05914e-06	5.86865e-06	0.534148	2.17625e-06	5.31983e-06	0.00084122	0.0370711	BOTH
FBgn0010497	dmGlut	2L:12027438-12034122	+	Known	YES	0.00723024	0.0961446	0.254978	0.390756	0.930074	0.0291176	0.0667666	0.53531	0.000190308	0.000395161	2.00377e-05	0.00165324	BOTH
FBgn0010651	MFS14	2R:14684480-14691232	-	Known	YES	0.0330092	0.000345581	0.00250045	0.304159	0.911631	0.0865562	0.16242	0.688356	1.23526e-13	5.25398e-13	0.00050233	0.0248137	BOTH
FBgn0011554	etaTry	2R:7228018-7228928	-	Known	YES	0.00674157	0.108179	0.277922	0.819441	0.982376	5.1581e-13	5.86016e-12	0.733782	2.67361e-11	9.48445e-11	5.95478e-08	9.25748e-06	BOTH
FBgn0011661	Moe	X:8767045-8792365	-	Known	YES	0.00837834	0.073198	0.208121	0.00246925	0.643464	8.39665e-09	6.03107e-08	0.529034	3.92683e-06	9.39999e-06	0.000757992	0.0341656	BOTH
FBgn0011822	Pgcl	X:330172-331481	-	Known	YES	0.000442782	0.681039	0.904044	0.380778	0.928629	4.2909e-12	4.41342e-11	0.43733	0.356752	0.465558	1.00779e-06	0.000118327	BASELINE
FBgn0012042	AttA	2R:10634867-10635720	+	Known	YES	0.113341	1.24882e-11	3.68825e-10	0.234325	0.894606	1.45769e-05	6.93854e-05	0.659749	6.25101e-12	2.32792e-11	0.000517578	0.0255217	BOTH
FBgn0013307	Odc1	2R:3892329-3894177	+	Known	YES	0.000536782	0.650844	0.881691	0.0684148	0.817718	0.000499614	0.00184097	0.813986	1.33366e-19	9.67679e-19	8.0525e-07	9.76184e-05	BOTH
FBgn0013772	Cyp6a8	2R:10774676-10776515	-	Known	YES	0.0182122	0.00809641	0.0369145	0.816503	0.982269	0.164845	0.270277	0.971994	1.85945e-57	8.67226e-55	2.11592e-07	2.88831e-05	BOTH
FBgn0013995	Calx	3R:16803905-16841335	+	Known	YES	0.00695835	0.102649	0.267351	0.877308	0.990307	7.14893e-06	3.55931e-05	0.617513	1.10795e-08	3.22756e-08	0.00011223	0.00699199	BOTH
FBgn0014011	Rac2	3L:7426749-7428290	-	Known	YES	0.00408109	0.211647	0.441545	0.0113409	0.713503	0.000175908	0.000706325	0.640438	5.97105e-11	2.0656e-10	0.000586481	0.027798	BOTH
FBgn0014018	Rel	3R:4869905-4873699	-	Known	YES	0.0422426	4.95327e-05	0.000447246	0.401208	0.931973	0.57408	0.686508	0.70619	2.2132e-13	9.22074e-13	6.88151e-05	0.00464952	BOTH
FBgn0014342	mia	3R:1373837-1376890	-	Known	YES	0.00442102	0.193553	0.416701	0.478642	0.943323	1.20261e-09	9.48637e-09	0.815426	2.17818e-24	2.66557e-23	0.000582493	0.0277843	BOTH
FBgn0014396	tim	2L:3493986-3508119	-	Known	YES	0.00097899	0.541012	0.793534	0.0436319	0.777096	9.81833e-06	4.78058e-05	0.633467	3.69825e-06	8.86671e-06	1.64529e-07	2.283e-05	BOTH
FBgn0014469	Cyp4e2	2R:4332065-4334669	+	Known	YES	0.000659904	0.615785	0.853847	0.927236	0.995359	3.11451e-12	3.25733e-11	0.908524	1.96142e-36	8.01272e-35	2.84544e-05	0.0022118	BOTH
FBgn0014865	Mtk	2R:11296351-11296618	+	Known	YES	0.0170542	0.010416	0.0452717	0.325155	0.917198	7.50916e-05	0.000321553	0.55702	0.00446808	0.00802171	7.69212e-08	1.15313e-05	BOTH
FBgn0014903	CG14630	X:925538-927198	+	Known	YES	0.00089787	0.55828	0.808217	0.0639965	0.810654	4.88498e-15	6.85613e-14	0.801333	2.16415e-19	1.53511e-18	4.86151e-06	0.000469108	BOTH
FBgn0015010	Ag5r	X:14678697-14680584	-	Known	YES	0.00358329	0.241901	0.484148	0.809068	0.982258	6.79646e-06	3.39439e-05	0.822969	1.68795e-25	2.33257e-24	0.000777033	0.0348834	BOTH
FBgn0015035	Cyp4e3	2L:9747839-9750071	-	Known	YES	0.00128525	0.483643	0.744888	0.138386	0.856759	4.10327e-12	4.23471e-11	0.874898	1.86826e-27	3.18356e-26	6.57839e-07	8.18157e-05	BOTH
FBgn0015037	Cyp4p1	2R:5127546-5129644	+	Known	YES	0.128275	4.58868e-13	1.66043e-11	0.0115383	0.713503	6.13531e-06	3.08253e-05	0.952059	1.15319e-52	2.87899e-50	0.0008367	0.0369204	BOTH
FBgn0015316	Try29F	2L:8998537-8999816	+	Known	YES	0.0236953	0.00248908	0.0136641	0.0797502	0.827899	0.416643	0.544939	0.805481	2.28791e-19	1.61777e-18	2.38514e-06	0.000255073	BOTH
FBgn0015336	CG15865	X:16554931-16558488	-	Known	YES	0.0378929	0.000123583	0.00100482	0.762769	0.977318	9.46811e-07	5.27662e-06	0.70497	3.35287e-14	1.49066e-13	0.000250327	0.0137352	BOTH
FBgn0015568	alpha-Est1	3R:3371455-3374846	-	Known	YES	0.165573	9.56625e-17	5.46317e-15	0.0957871	0.834208	6.52228e-07	3.71066e-06	0.816739	1.72208e-11	6.20398e-11	4.46187e-15	2.08097e-12	BOTH
FBgn0015574	alpha-Est6	3R:3350289-3354499	-	Known	YES	0.00607685	0.127278	0.312039	0.427981	0.937354	0.0123025	0.0321042	0.727863	3.68324e-13	1.50944e-12	4.45064e-06	0.000435722	BOTH
FBgn0015575	alpha-Est7	3R:3345285-3349475	-	Known	YES	0.000783916	0.584396	0.829949	0.699701	0.970217	9.18083e-06	4.48775e-05	0.650337	0.000811367	0.00158001	1.92801e-11	5.17941e-09	BOTH
FBgn0015714	Cyp6a17	2R:10761458-10763244	+	Known	YES	0.0126944	0.0272656	0.0982591	0.597838	0.957896	8.4095e-05	0.00035701	0.93243	9.87074e-26	1.39566e-24	1.09408e-20	9.1848e-18	BOTH
FBgn0015773	NetA	X:14498045-14547961	-	Known	YES	0.00189069	0.395495	0.661127	0.643093	0.964347	2.00884e-12	2.14302e-11	0.679727	3.51027e-10	1.14676e-09	5.25023e-06	0.00050086	BOTH
FBgn0016123	Alp4	3R:26874651-26878262	+	Known	YES	0.0149382	0.0165645	0.0661242	0.708314	0.971718	4.86201e-06	2.4754e-05	0.793695	8.7623e-22	8.1529e-21	0.000398105	0.0203167	BOTH
FBgn0016675	Lectin-galC1	2L:19417447-19418274	+	Known	YES	0.000682793	0.609726	0.849321	0.554795	0.951188	3.92353e-12	4.06545e-11	0.963154	2.44359e-50	4.58412e-48	1.91997e-08	3.22363e-06	BOTH
FBgn0019890	Smg5	2L:13898828-13904661	-	Known	YES	0.000716047	0.601146	0.842649	0.968577	0.998387	0.598644	0.706844	0.666494	1.41217e-11	5.12602e-11	0.000181333	0.0104986	BOTH
FBgn0020236	ATPCL	2R:11881036-11888795	-	Known	YES	0.000174692	0.796277	0.980635	0.617517	0.961699	0	0	0.692468	1.16712e-11	4.26092e-11	1.82305e-05	0.00152663	BOTH
FBgn0020508	Ag5r2	X:14676995-14678085	-	Known	YES	0.00355678	0.243653	0.486638	0.689889	0.96909	0.00375775	0.0113643	0.761006	2.52733e-12	9.71472e-12	7.59748e-09	1.38654e-06	BOTH
FBgn0020762	Atet	2L:4333913-4345776	+	Known	YES	0.0600069	1.18068e-06	1.54209e-05	0.457994	0.942433	0.17376	0.281375	0.778665	1.45944e-13	6.17307e-13	5.00903e-09	9.55701e-07	BOTH
FBgn0020906	Jon25Bi	2L:4954279-4955144	-	Known	YES	0.00417579	0.206414	0.434461	0.976237	0.999388	6.86401e-05	0.000295321	0.704787	2.84284e-14	1.26996e-13	0.000280683	0.0151289	BOTH
FBgn0022355	Tsf1	X:18281117-18284377	+	Known	YES	0.00565445	0.141341	0.336278	0.526749	0.948062	6.25257e-09	4.54845e-08	0.70243	7.11328e-15	3.3445e-14	0.00075777	0.0341656	BOTH
FBgn0022700	Cht4	2R:16952884-16954592	-	Known	YES	0.0123422	0.0295057	0.104658	0.731437	0.974204	0.000920585	0.00321033	0.85177	4.70753e-21	3.99391e-20	3.00709e-09	5.97503e-07	BOTH
FBgn0022702	Cht2	3L:1752328-1755934	-	Known	YES	0.00144589	0.457499	0.721123	0.375084	0.928287	0.0511545	0.106095	0.818161	3.08886e-22	3.01611e-21	2.40541e-05	0.00194239	BOTH
FBgn0023395	Chd3	3L:19440273-19443338	+	Known	YES	0.00294543	0.288772	0.542851	0.499929	0.94658	0.000647626	0.00233334	0.756054	6.50294e-19	4.38668e-18	0.000776636	0.0348834	BOTH
FBgn0023479	teq	3L:9067743-9085231	+	Known	YES	0.00188624	0.396052	0.661569	0.634508	0.962977	1.79583e-07	1.10421e-06	0.761163	0.00639637	0.0112627	8.51452e-23	8.93493e-20	BOTH
FBgn0023550	FarO	X:2095853-2097899	-	Known	YES	0.00604016	0.128435	0.313914	0.505991	0.946647	4.89976e-06	2.49272e-05	0.755474	1.09051e-16	5.99827e-16	4.32879e-05	0.00313954	BOTH
FBgn0024361	Tsp2A	X:1240586-1242176	+	Known	YES	0.0856261	5.10073e-09	1.01833e-07	0.671166	0.966104	0.23656	0.357449	0.592055	1.72491e-08	4.95445e-08	0.000531694	0.0260647	BOTH
FBgn0024806	DIP2	3L:250229-257954	-	Known	YES	0.000400959	0.695688	0.914101	0.712785	0.972408	0.475124	0.599471	0.432046	0.0133509	0.0225276	0.000222267	0.0123982	BASELINE
FBgn0025583	IM2	2R:14274107-14274535	+	Known	YES	0.0644904	4.58138e-07	6.53537e-06	0.483392	0.943323	0	0	0.632247	1.36488e-10	4.60076e-10	0.000650377	0.0302104	BOTH
FBgn0025692	Lfg	2R:8762669-8764471	-	Known	YES	0.0117832	0.033462	0.115206	0.459628	0.942896	0	0	0.621353	8.60835e-06	2.00186e-05	2.42449e-07	3.26966e-05	BOTH
FBgn0025827	CG6421	2R:12759755-12760411	+	Known	YES	0.00125537	0.488774	0.749182	0.669954	0.966042	1.13287e-08	8.0204e-08	0.915374	1.24071e-19	9.02186e-19	4.88877e-23	5.29564e-20	BOTH
FBgn0025837	CG17636	X:20757-23101	-	Known	YES	1.08816e-06	0.983744	1	0.145501	0.859346	0.171856	0.278862	0.819986	7.78055e-21	6.45591e-20	2.09834e-06	0.000228033	BOTH
FBgn0027073	CG4302	2R:17100385-17102477	-	Known	YES	0.236431	3.50119e-24	4.22914e-22	0.496554	0.945235	0	0	0.922472	1.22239e-38	6.20056e-37	5.43408e-06	0.000516931	BOTH
FBgn0027341	Gfat1	3RHet:2470208-2481648	+	Known	YES	0	1	1	0.215687	0.889695	6.40306e-09	4.65289e-08	0.78329	1.68163e-21	1.50625e-20	0.000941262	0.0403673	BOTH
FBgn0027571	CG3523	2L:3056598-3068177	+	Known	YES	0.00852018	0.0707997	0.203087	0.12343	0.85495	0.0013058	0.00440939	0.656339	6.71578e-08	1.84125e-07	7.18823e-07	8.90704e-05	BOTH
FBgn0027578	CG14526	3R:24709415-24711737	+	Known	YES	0.244455	4.57997e-25	5.8036e-23	0.537345	0.949726	2.86586e-10	2.42227e-09	0.7923	5.65152e-22	5.35642e-21	0.000591173	0.027894	BOTH
FBgn0027584	CG4757	3R:6986929-6989220	+	Known	YES	0.0292347	0.00076703	0.00498006	0.963947	0.998005	6.40047e-06	3.20664e-05	0.871119	5.5888e-22	5.30147e-21	6.8408e-11	1.68907e-08	BOTH
FBgn0027592	MED15	2L:473013-476170	+	Known	YES	0.00232478	0.346037	0.608514	0.345801	0.921448	0.451857	0.578226	0.752651	4.59613e-09	1.38073e-08	1.22034e-11	3.33162e-09	BOTH
FBgn0027654	jdp	3R:26342781-26352759	-	Known	YES	0.00590346	0.132853	0.321437	0.799985	0.981673	1.19149e-11	1.16125e-10	0.624023	1.38434e-10	4.66402e-10	0.00114741	0.0476266	BOTH
FBgn0027843	CAH2	3L:12170701-12176447	+	Known	YES	0.000938789	0.549443	0.800446	0.723331	0.973383	0	0	0.861778	7.23633e-30	1.55967e-28	0.000328551	0.0171849	BOTH
FBgn0027844	CAH1	2L:13803626-13809994	+	Known	YES	0.0121787	0.0306097	0.107563	0.288573	0.909259	0.00279904	0.00874622	0.632773	1.51979e-10	5.10245e-10	0.000586849	0.027798	BOTH
FBgn0027929	NimB1	2L:13963507-13965088	+	Known	YES	0.0175402	0.00936959	0.0416729	0.788116	0.980298	0.000829179	0.00292315	0.653221	6.75029e-12	2.50719e-11	0.000813515	0.0361881	BOTH
FBgn0028410	Pk34A	2L:13158810-13160173	+	Known	YES	0.00533761	0.153033	0.355384	0.974796	0.999179	2.5937e-05	0.000119447	0.783763	3.79692e-21	3.25506e-20	0.00058998	0.027894	BOTH
FBgn0028482	bdl	2L:4324554-4331830	+	Known	YES	0.00708154	0.0996446	0.261587	0.0380071	0.771133	1.27482e-07	7.98026e-07	0.828412	1.48364e-16	8.05901e-16	9.01351e-11	2.168e-08	BOTH
FBgn0028518	CG18480	2L:15630002-15634987	+	Known	YES	0.00416053	0.207247	0.435506	0.880656	0.990764	0	0	0.734388	7.98088e-12	2.94827e-11	1.595e-07	2.23168e-05	BOTH
FBgn0028532	CG7968	2L:13849400-13850329	+	Known	YES	0.00492594	0.169892	0.381886	0.828444	0.983608	0	0	0.633325	5.07518e-09	1.51812e-08	5.44124e-05	0.00379869	BOTH
FBgn0028554	x16	2L:6914301-6920210	-	Known	YES	0.0880175	3.05308e-09	6.35601e-08	0.586773	0.956122	0.0120876	0.0316441	0.466579	0.000270314	0.000553047	0.00113879	0.0473274	BOTH
FBgn0028699	Rh50	3L:4910368-4920198	+	Known	YES	0.0148751	0.0167966	0.0669391	0.604546	0.958525	0.000132328	0.00054283	0.68699	1.01606e-11	3.724e-11	3.48279e-05	0.00261638	BOTH
FBgn0028945	CG7631	2L:15628678-15629552	+	Known	YES	0.00337578	0.25604	0.502057	0.616203	0.961699	1.9984e-15	2.92333e-14	0.696166	5.17049e-14	2.26724e-13	0.000425933	0.0215605	BOTH
FBgn0028950	CG15255	2L:15610171-15611719	-	Known	YES	0.0130348	0.0252671	0.0925771	0.155249	0.865597	4.44089e-15	6.2669e-14	0.748944	1.14387e-08	3.32825e-08	8.2462e-12	2.32695e-09	BOTH
FBgn0029128	tyn	X:38595-97667	+	Known	YES	0.00999207	0.0503083	0.157237	0.0842029	0.830382	0.105746	0.190364	0.829693	2.70218e-18	1.71692e-17	2.77491e-09	5.54652e-07	BOTH
FBgn0029167	Hml	3L:13839154-13853101	+	Known	YES	0.0241716	0.00224846	0.0125358	0.025512	0.759299	0.508219	0.62929	0.880535	4.39123e-29	8.72293e-28	1.95344e-06	0.000212976	BOTH
FBgn0029661	CG16781	X:3356507-3358077	-	Known	YES	0.0022358	0.355447	0.618666	0.462703	0.943323	0.362415	0.4911	0.667425	1.58054e-11	5.71248e-11	0.000155824	0.00922854	BOTH
FBgn0029835	CG5921	X:5944861-5959679	+	Known	YES	0.000665726	0.614231	0.852838	0.505221	0.946647	1.50499e-05	7.14747e-05	0.593667	2.31187e-05	5.18622e-05	1.30055e-06	0.000147542	BOTH
FBgn0029836	CG5928	X:5961991-5963297	+	Known	YES	0.0118045	0.0333014	0.114717	0.0955807	0.834208	0.0112089	0.0296513	0.830657	6.76474e-13	2.71983e-12	4.41778e-15	2.08097e-12	BOTH
FBgn0029856	CG11700	X:6176070-6177608	-	Known	YES	0.00155903	0.440402	0.705501	0.226602	0.894606	0.0322468	0.0726619	0.676961	7.87089e-08	2.14777e-07	5.74916e-08	8.97939e-06	BOTH
FBgn0029895	CG14441	X:6593541-6613422	+	Known	YES	0.0156006	0.0143175	0.0590205	0.0309991	0.771133	0.0352357	0.0780917	0.527446	0.141558	0.201506	3.37493e-09	6.6275e-07	BOTH
FBgn0029986	CG15332	X:7847885-7850023	-	Known	YES	2.67616e-06	0.97451	1	0.125895	0.85495	0.00412932	0.0123501	0.54033	1.24594e-06	3.10238e-06	0.000849707	0.0373471	BOTH
FBgn0030005	CG2120	X:8029857-8031079	+	Known	YES	0.0179811	0.0085131	0.0385114	0.122549	0.85495	0.178972	0.287954	0.676296	4.40731e-13	1.79739e-12	0.000651931	0.0302374	BOTH
FBgn0030040	CG15347	X:8352527-8354931	-	Known	YES	0.00111262	0.514601	0.770956	0.118996	0.851663	1.57439e-08	1.0975e-07	0.57859	1.93068e-05	4.35934e-05	5.89754e-06	0.000556291	BOTH
FBgn0030098	CG12057	X:9085690-9086581	+	Known	YES	0.0379473	0.000122175	0.00099482	0.568117	0.953207	1.29754e-07	8.11945e-07	0.905512	3.71261e-31	9.0867e-30	2.25209e-08	3.74381e-06	BOTH
FBgn0030270	CG15199	X:11034507-11035868	-	Known	YES	0.000228147	0.767964	0.961602	0.285483	0.908483	1.20186e-11	1.17055e-10	0.785638	3.5943e-08	1.00664e-07	5.96716e-16	3.08273e-13	BOTH
FBgn0030332	CG9360	X:11657507-11658623	-	Known	YES	0.0385323	0.000108034	0.000891565	0.616997	0.961699	1.33415e-09	1.04625e-08	0.979303	6.80875e-68	1.03769e-64	7.17278e-05	0.00481724	BOTH
FBgn0030356	lncRNA:CR32661	X:11811839-11812711	-	Known	YES	0.00384521	0.225381	0.460835	0.177177	0.876296	0.0117969	0.030975	0.951137	3.64132e-51	7.64223e-49	0.000249351	0.0137041	BOTH
FBgn0030396	CG2556	X:12391221-12410598	+	Known	YES	0.00639431	0.11773	0.295115	0.306265	0.911864	0	0	0.626736	3.20394e-10	1.04934e-09	0.000577519	0.0275862	BOTH
FBgn0030482	CG1673	X:13290932-13295257	+	Known	YES	0.00964623	0.0544808	0.167044	0.767206	0.977961	3.50862e-11	3.25031e-10	0.790791	3.11601e-19	2.17447e-18	1.86028e-05	0.00155394	BOTH
FBgn0030607	dob	X:14961040-14963124	+	Known	YES	0.0323343	0.000398452	0.00282398	0.364937	0.925635	4.58559e-05	0.000202456	0.755909	3.27049e-17	1.88247e-16	8.69942e-05	0.00561782	BOTH
FBgn0030615	Cyp4s3	X:15007335-15010575	-	Known	YES	0.0109215	0.0406757	0.133503	0.564763	0.95288	6.03739e-13	6.80159e-12	0.8336	1.47501e-21	1.33255e-20	5.15032e-07	6.57596e-05	BOTH
FBgn0030665	CG15646	X:15561918-15565062	-	Known	YES	0.00112962	0.511404	0.768111	0.764544	0.977533	2.08131e-05	9.71683e-05	0.682083	7.79986e-13	3.11846e-12	0.000289242	0.0154267	BOTH
FBgn0030747	CG4301	X:16299542-16308684	+	Known	YES	0.00530018	0.154485	0.357674	0.158781	0.865729	0.209345	0.325694	0.707506	1.31763e-09	4.11552e-09	6.18424e-08	9.52599e-06	BOTH
FBgn0030757	CG9902	X:16436157-16441553	-	Known	YES	0.0682803	2.05449e-07	3.13876e-06	0.329528	0.917198	0.011112	0.0294158	0.502058	0.00210649	0.00391542	1.89181e-05	0.00157245	BASELINE
FBgn0030773	CG9676	X:16593185-16594203	-	Known	YES	1.77706e-05	0.934378	1	0.0299794	0.771133	0.0154789	0.0391162	0.856112	1.13216e-28	2.16873e-27	0.000211918	0.0120598	BOTH
FBgn0030774	spheroide	X:16594479-16596005	-	Known	YES	0.00374091	0.231791	0.470362	0.321718	0.916009	0.0130391	0.0337588	0.626517	2.90281e-09	8.85263e-09	0.000140854	0.00850697	BOTH
FBgn0030775	CG9673	X:16596819-16597917	-	Known	YES	0.0184138	0.00774986	0.0355693	0.359175	0.924768	0.00598746	0.0171306	0.686078	2.82447e-12	1.08197e-11	9.02102e-05	0.00580318	BOTH
FBgn0030776	CG4653	X:16598114-16599311	+	Known	YES	0.024383	0.00214934	0.0120815	0.59433	0.95702	0.000371251	0.00139915	0.62379	1.71696e-09	5.31729e-09	0.000247567	0.0136537	BOTH
FBgn0030777	CG9672	X:16600004-16600907	-	Known	YES	9.66594e-05	0.847715	1	0.91107	0.994818	6.31127e-06	3.16383e-05	0.78295	1.72668e-14	7.85236e-14	1.60777e-08	2.74055e-06	BOTH
FBgn0030837	CG8661	X:17177795-17178533	-	Known	YES	0.0206861	0.00474398	0.0235907	0.210512	0.888529	2.80665e-05	0.000128442	0.846971	0.000128766	0.000270975	7.36256e-32	1.45432e-28	BOTH
FBgn0030863	CG8188	X:17592950-17597057	-	Known	YES	0.00232863	0.345637	0.608251	0.110931	0.848255	0.000666721	0.00239239	0.549575	0.000104301	0.000221336	1.21604e-05	0.00106618	BOTH
FBgn0030929	CG15043	X:18387226-18388201	-	Known	YES	0.0244052	0.00213918	0.0120405	0.327203	0.917198	1.48323e-05	7.0541e-05	0.779188	7.9162e-06	1.84807e-05	6.37339e-19	4.45871e-16	BOTH
FBgn0030993	Mec2	X:19082068-19084226	+	Known	YES	0.017428	0.00960129	0.0424337	0.253749	0.897297	0.249146	0.371599	0.647656	3.54367e-10	1.1571e-09	0.000106434	0.00666799	BOTH
FBgn0031033	CG14219	X:19481381-19484203	-	Known	YES	0.0254035	0.00172934	0.0100469	0.985563	0.999388	7.12174e-06	3.54735e-05	0.562237	1.59881e-07	4.26604e-07	0.000868088	0.0380057	BOTH
FBgn0031034	CG14205	X:19486642-19489581	+	Known	YES	0.0120199	0.0317235	0.110597	0.721443	0.97329	1.08515e-09	8.60431e-09	0.73667	1.28485e-14	5.91191e-14	1.71594e-05	0.00144777	BOTH
FBgn0031037	CG14207	X:19499232-19505446	+	Known	YES	0.0330938	0.000339475	0.00245945	0.35196	0.922621	0.000357315	0.00135148	0.726507	1.03756e-14	4.81368e-14	6.14693e-05	0.00422979	BOTH
FBgn0031065	CG14234	X:19629603-19634489	+	Known	YES	0.0523412	5.93246e-06	6.66261e-05	0.696455	0.970217	0.16418	0.269383	0.652699	4.66867e-12	1.75598e-11	0.00104143	0.0441555	BOTH
FBgn0031248	CG11912	2L:318362-319259	-	Known	YES	0.025779	0.00159655	0.00937602	0.0350459	0.771133	0.0681326	0.134077	0.887565	2.25647e-23	2.46253e-22	3.9654e-12	1.16805e-09	BOTH
FBgn0031249	CG11911	2L:320279-321248	-	Known	YES	0.0730711	7.43518e-08	1.23417e-06	0.722957	0.973383	0.000239456	0.000937715	0.943031	2.26289e-42	1.68115e-40	1.00494e-07	1.44832e-05	BOTH
FBgn0031251	CG4213	2L:396595-402198	-	Known	YES	0.00486251	0.172674	0.386019	0.691355	0.969445	0.0612099	0.122741	0.884296	1.2375e-31	3.16492e-30	2.99244e-05	0.00229347	BOTH
FBgn0031258	CG4297	2L:458876-475016	-	Known	YES	0.0108237	0.0415913	0.135963	0.912446	0.994823	0.0109165	0.0289669	0.836537	3.91473e-24	4.67152e-23	1.64495e-05	0.00139489	BOTH
FBgn0031317	Charon	2L:1170753-1172805	-	Known	YES	0.000638353	0.621611	0.858399	0.472821	0.943323	0.00247852	0.00786621	0.628904	6.47727e-05	0.000139993	1.0483e-08	1.88246e-06	BOTH
FBgn0031412	CG16995	2L:2307948-2308872	+	Known	YES	0.00484871	0.173286	0.387035	0.281865	0.907173	2.01388e-08	1.3883e-07	0.79213	3.21994e-09	9.79133e-09	3.34965e-15	1.65414e-12	BOTH
FBgn0031461	daw	2L:2805261-2812376	+	Known	YES	0.0477407	1.56037e-05	0.00015964	0.38695	0.929861	0	0	0.764426	6.06674e-16	3.11453e-15	4.31984e-06	0.000425397	BOTH
FBgn0031490	CG17264	2L:3018508-3021506	+	Known	YES	0.324674	1.94809e-34	5.94699e-32	0.0425411	0.777096	0.385584	0.514602	0.841903	2.22278e-20	1.75502e-19	9.66908e-09	1.74563e-06	BOTH
FBgn0031514	CG3332	2L:3275800-3280534	-	Known	YES	0.0301614	0.000630487	0.00420743	0.165591	0.868766	0	0	0.697216	2.76428e-10	9.09597e-10	9.09444e-07	0.000108295	BOTH
FBgn0031558	CG16704	2L:3692123-3692587	-	Known	YES	0.0103289	0.0465672	0.148272	0.415978	0.935077	0	0	0.860248	9.09201e-30	1.94465e-28	0.000381974	0.0196127	BOTH
FBgn0031559	CG3513	2L:3692699-3693182	-	Known	YES	0.15987	3.57424e-16	1.85221e-14	0.859517	0.98754	0.469218	0.594079	0.827853	1.55295e-25	2.15666e-24	0.000414705	0.0210997	BOTH
FBgn0031571	bark	2L:3787167-3802726	+	Known	YES	0.0537048	4.4531e-06	5.14563e-05	0.147569	0.860752	0.67849	0.770552	0.7336	3.65005e-13	1.4962e-12	2.20039e-06	0.000237586	BOTH
FBgn0031646	CG2837	2L:4903865-4906762	-	Known	YES	0.0100849	0.0492468	0.154697	0.140081	0.857312	1.59687e-08	1.11224e-07	0.778351	4.70722e-14	2.06923e-13	1.48785e-08	2.56216e-06	BOTH
FBgn0031653	Jon25Biii	2L:4949941-4950767	-	Known	YES	0.00232976	0.34552	0.608101	0.522319	0.947915	8.28974e-10	6.6532e-09	0.839556	1.11211e-23	1.25951e-22	4.801e-06	0.000464604	BOTH
FBgn0031654	Jon25Bii	2L:4952243-4953136	-	Known	YES	0.0181312	0.00824005	0.0374629	0.921106	0.994948	0.439433	0.566842	0.772325	7.31089e-18	4.4612e-17	2.99831e-05	0.00229347	BOTH
FBgn0031805	CG9505	2L:6367882-6370190	+	Known	YES	0.0224617	0.00324048	0.0171093	0.0393057	0.771133	0	0	0.70141	1.83373e-12	7.13768e-12	2.69288e-05	0.00211278	BOTH
FBgn0031910	CG15818	2L:7410909-7412229	+	Known	YES	0.121317	2.15192e-12	6.9953e-11	0.776713	0.978449	0	0	0.918779	1.23746e-28	2.35878e-27	2.67451e-13	9.35521e-11	BOTH
FBgn0031969	pes	2L:7986786-7994184	-	Known	YES	0.0498174	1.00853e-05	0.000107889	0.147825	0.861074	2.29816e-13	2.71001e-12	0.619234	1.16969e-08	3.40043e-08	9.42573e-05	0.00601741	BOTH
FBgn0031970	CG7227	2L:7994388-7998151	-	Known	YES	0.053416	4.73204e-06	5.42698e-05	0.126631	0.85495	0.141968	0.23994	0.819818	3.4662e-25	4.62252e-24	0.000823998	0.0364557	BOTH
FBgn0032002	CG8353	2L:8214045-8215239	+	Known	YES	0.00399917	0.216301	0.448275	0.53994	0.949726	2.26929e-08	1.5532e-07	0.672783	0.000890251	0.00172592	5.75288e-13	1.85752e-10	BOTH
FBgn0032049	Bace	2L:8494893-8496307	-	Known	YES	0.0434121	3.87416e-05	0.000360273	0.970475	0.998941	0.174642	0.28249	0.83288	2.09191e-19	1.48543e-18	1.21519e-08	2.15905e-06	BOTH
FBgn0032066	LManIII	2L:8765273-8768710	-	Known	YES	0.000465008	0.673581	0.898929	0.790627	0.980629	0	0	0.711305	2.15528e-14	9.71989e-14	0.000180312	0.0104575	BOTH
FBgn0032068	LManV	2L:8772946-8776263	-	Known	YES	0.00119049	0.500232	0.758682	0.136415	0.856572	0	0	0.838763	2.05541e-23	2.25557e-22	3.71529e-06	0.000372416	BOTH
FBgn0032069	LManVI	2L:8777661-8781252	-	Known	YES	0.00846398	0.0717398	0.205111	0.121196	0.853515	3.46047e-05	0.000155626	0.813646	3.74003e-21	3.20956e-20	1.01642e-05	0.000905344	BOTH
FBgn0032087	CG9568	2L:9010583-9011358	+	Known	YES	0.0372577	0.000141247	0.00113498	0.240669	0.894987	5.05151e-13	5.75074e-12	0.727621	1.21702e-14	5.6106e-14	4.92249e-05	0.00349466	BOTH
FBgn0032144	CG17633	2L:9769060-9770409	+	Known	YES	0.00879344	0.0664122	0.193924	0.567378	0.953136	0	0	0.82647	1.13806e-21	1.04387e-20	2.45975e-06	0.000261387	BOTH
FBgn0032253	LManI	2L:10452677-10457241	-	Known	YES	0.00391712	0.221084	0.454903	0.923057	0.995075	0	0	0.864024	2.03054e-29	4.19603e-28	0.000126164	0.00768891	BOTH
FBgn0032283	CG7296	2L:10686124-10687066	-	Known	YES	0.0131301	0.0247351	0.0909952	0.478458	0.943323	0.00250589	0.00793734	0.698268	3.93238e-13	1.60967e-12	0.000102674	0.00646863	BOTH
FBgn0032297	CG17124	2L:10744075-10756325	-	Known	YES	0.0331663	0.000334322	0.00242789	0.118891	0.851663	0.0819663	0.155441	0.80067	9.29614e-21	7.63798e-20	4.12731e-05	0.00301294	BOTH
FBgn0032381	Mal-B1	2L:11847226-11849169	+	Known	YES	0.105403	7.09383e-11	1.89809e-09	0.0749094	0.819152	3.88155e-06	2.00233e-05	0.889261	2.32042e-29	4.76574e-28	2.59192e-07	3.46759e-05	BOTH
FBgn0032382	Mal-B2	2L:11849958-11852881	+	Known	YES	0.101616	1.61782e-10	4.1032e-09	0.597201	0.957757	1.14908e-13	1.39924e-12	0.810573	9.03985e-24	1.03603e-22	0.000527873	0.0259911	BOTH
FBgn0032387	CG16965	2L:11981591-11984380	+	Known	YES	0.00275148	0.305245	0.562205	0.777678	0.978562	0	0	0.712775	9.36107e-09	2.74393e-08	4.21174e-09	8.12818e-07	BOTH
FBgn0032400	CG6770	2L:12045343-12046118	-	Known	YES	0.000912159	0.555163	0.805391	0.774127	0.978388	4.44089e-16	6.85785e-15	0.844872	7.68556e-06	1.79622e-05	1.0476e-28	1.8515e-25	BOTH
FBgn0032428	CG6405	2L:12424904-12426440	+	Known	YES	0.0199206	0.00559458	0.0271443	0.988871	0.999388	2.31193e-12	2.44537e-11	0.691179	4.15483e-14	1.83144e-13	0.000734003	0.0333529	BOTH
FBgn0032433	Oatp33Ea	2L:12441401-12445924	-	Known	YES	0.00194389	0.38892	0.654404	0.200045	0.88363	2.87156e-05	0.000131126	0.93358	3.41009e-39	1.82342e-37	9.57063e-08	1.39126e-05	BOTH
FBgn0032435	Oatp33Eb	2L:12448484-12452047	+	Known	YES	0.0591422	1.41685e-06	1.82151e-05	0.092022	0.833784	0.000124748	0.000514691	0.651297	6.13944e-07	1.5648e-06	1.47695e-07	2.09266e-05	BOTH
FBgn0032506	CG9395	2L:13349823-13355073	-	Known	YES	0.00519067	0.158823	0.364642	0.247944	0.89588	2.92766e-06	1.53742e-05	0.421143	0.21493	0.295079	9.11028e-06	0.000819636	BASELINE
FBgn0032507	CG9377	2L:13359901-13361565	-	Known	YES	0.00227464	0.351297	0.614116	0.379764	0.928629	0.000148453	0.000604103	0.838524	3.3016e-12	1.25829e-11	4.68875e-17	2.81157e-14	BOTH
FBgn0032514	CG9302	2L:13376455-13378538	-	Known	YES	0.00352579	0.245721	0.488997	0.26111	0.90079	0.673734	0.766901	0.536059	1.38041e-05	3.15228e-05	0.000191265	0.0109789	BOTH
FBgn0032680	Ntf-2r	2L:18454649-18455419	+	Known	YES	0.0234422	0.00262736	0.0143063	0.554216	0.951188	2.59833e-11	2.43459e-10	0.915391	4.86712e-40	2.83254e-38	0.000332786	0.0173524	BOTH
FBgn0032699	CG10383	2L:18690904-18695602	-	Known	YES	0.0269695	0.00123971	0.00755159	0.810873	0.982268	2.22045e-16	3.53964e-15	0.685681	2.48386e-12	9.55528e-12	0.000101759	0.00642304	BOTH
FBgn0032772	CG17350	2L:19380930-19383093	+	Known	YES	0.00225661	0.353215	0.616251	0.4046	0.932596	4.90701e-11	4.4705e-10	0.778377	2.67229e-20	2.09174e-19	0.000388029	0.0198931	BOTH
FBgn0032775	CG17544	2L:19390370-19398493	-	Known	YES	0.0205785	0.00485513	0.0240572	0.0332242	0.771133	0.000321904	0.00122792	0.659946	8.09165e-07	2.04299e-06	4.07463e-08	6.60995e-06	BOTH
FBgn0032923	CG9248	2L:21158847-21160903	+	Known	YES	0.000152335	0.809492	0.989097	0.742621	0.975679	0.461862	0.587423	0.773431	0.0635675	0.0965837	3.09341e-27	4.51638e-24	BOTH
FBgn0032945	CG8665	2L:21371227-21377995	+	Known	YES	6.18109e-06	0.96127	1	0.848184	0.986165	4.34143e-06	2.22622e-05	0.822776	1.6463e-17	9.71919e-17	2.70462e-09	5.47116e-07	BOTH
FBgn0032966	CG1421	2L:21902993-21903739	+	Known	YES	0.494761	1.34965e-58	1.61862e-55	0.516455	0.947326	0.0726531	0.141185	0.922162	1.85324e-37	8.47846e-36	1.0719e-06	0.000124981	BOTH
FBgn0033065	Cyp6w1	2R:2061189-2063700	+	Known	YES	0.0385546	0.000107529	0.000888272	0.898754	0.993171	4.50431e-05	0.00019905	0.970651	1.12144e-60	7.53162e-58	7.26767e-05	0.00486152	BOTH
FBgn0033067	CG11211	2R:2068431-2069131	-	Known	YES	0.0359863	0.000184575	0.00143939	0.0774839	0.823976	0.000196681	0.000782623	0.875942	9.73213e-27	1.54153e-25	1.51087e-07	2.12281e-05	BOTH
FBgn0033128	Tsp42Eg	2R:2916416-2920738	+	Known	YES	0.00667997	0.109809	0.280859	0.102134	0.841166	0.0607858	0.122044	0.709476	1.03274e-15	5.20324e-15	0.00117385	0.0485443	BOTH
FBgn0033133	Tsp42Ek	2R:2930161-2932215	+	Known	YES	0.0298553	0.000672657	0.00444467	0.49294	0.944901	0.00156253	0.00517841	0.792772	2.16367e-21	1.90849e-20	0.000274173	0.0148018	BOTH
FBgn0033205	CG2064	2R:3553333-3554848	+	Known	YES	0.0962255	5.20484e-10	1.20787e-08	0.822138	0.982533	1.59848e-08	1.11314e-07	0.957156	7.29939e-50	1.25699e-47	1.2743e-06	0.000145548	BOTH
FBgn0033216	CG1946	2R:3602428-3604286	+	Known	YES	0.00306407	0.279249	0.530813	0.694975	0.970192	1.13134e-05	5.46338e-05	0.786365	9.06994e-15	4.22777e-14	1.53632e-08	2.63213e-06	BOTH
FBgn0033246	ACC	2R:3861620-3879367	-	Known	YES	0.0224137	0.00327398	0.0172645	0.577451	0.955118	0	0	0.639392	1.93679e-11	6.95142e-11	0.00121361	0.0495778	BOTH
FBgn0033250	CG14762	2R:3896624-3901260	-	Known	YES	0.0286593	0.000866396	0.00552585	0.111667	0.848499	0.000112453	0.000468339	0.813702	3.18911e-20	2.46923e-19	2.3631e-06	0.000253524	BOTH
FBgn0033271	CG8708	2R:4046911-4049070	-	Known	YES	4.07133e-06	0.968563	1	0.198432	0.88363	7.54313e-08	4.84666e-07	0.826539	1.27003e-18	8.31336e-18	1.09391e-08	1.9539e-06	BOTH
FBgn0033294	Mal-A4	2R:4346320-4348389	+	Known	YES	0.00476232	0.177174	0.392858	0.730913	0.973956	0	0	0.691422	2.66663e-14	1.1941e-13	0.000917499	0.039652	BOTH
FBgn0033301	CG12780	2R:4439364-4439795	-	Known	YES	0.0398412	8.20443e-05	0.000697834	0.597936	0.957896	0	0	0.832659	4.28895e-18	2.6785e-17	9.03154e-10	1.95664e-07	BOTH
FBgn0033366	Ance-4	2R:4927233-4929647	-	Known	YES	0.00174428	0.414442	0.679676	0.355952	0.923785	0	0	0.692889	1.49221e-13	6.30692e-13	0.000304984	0.0161212	BOTH
FBgn0033395	Cyp4p2	2R:5125017-5127336	+	Known	YES	0.00103589	0.529476	0.783458	0.0460438	0.785501	0	0	0.812608	1.57583e-20	1.26142e-19	4.62847e-06	0.000450504	BOTH
FBgn0033438	Mmp2	2R:5498644-5571363	-	Known	YES	0.000276058	0.745524	0.94814	0.304639	0.911631	6.44055e-05	0.000278207	0.612472	2.19477e-07	5.79314e-07	1.73374e-05	0.00145912	BOTH
FBgn0033443	CG1698	2R:5680831-5685511	+	Known	YES	0.0449586	2.79952e-05	0.000270371	0.665641	0.965701	0.254792	0.378139	0.679775	5.02895e-07	1.29038e-06	5.6455e-09	1.06503e-06	BOTH
FBgn0033494	KCNQ	2R:6033402-6079899	-	Known	YES	0.00232635	0.345874	0.608372	0.473365	0.943323	0.256328	0.379949	0.877952	3.61534e-33	1.07531e-31	0.000750498	0.0339189	BOTH
FBgn0033521	CG12896	2R:6314385-6315420	-	Known	YES	0.0243217	0.0021776	0.0122178	0.942011	0.996236	0.00110554	0.00379658	0.917786	4.31048e-36	1.72522e-34	7.35265e-07	9.07728e-05	BOTH
FBgn0033524	Cyp49a1	2R:6336855-6346397	-	Known	YES	0.021793	0.00373984	0.0193266	0.627822	0.961717	2.58127e-13	3.03638e-12	0.79693	3.65293e-22	3.53706e-21	0.00042633	0.0215605	BOTH
FBgn0033582	CG9084	2R:7104921-7107276	-	Known	YES	0.00391593	0.221155	0.454992	0.658354	0.965599	7.83817e-14	9.73883e-13	0.778168	2.26294e-20	1.78547e-19	0.000434347	0.0218671	BOTH
FBgn0033615	CG7741	2R:7189421-7193112	+	Known	YES	0.00111893	0.51341	0.770035	0.0192543	0.739814	0.0419703	0.0900337	0.479758	0.016081	0.0268198	8.24199e-06	0.000748016	BOTH
FBgn0033659	Damm	2R:7752681-7753888	-	Known	YES	0.00707306	0.0998483	0.261987	0.224761	0.893844	2.54381e-06	1.34299e-05	0.669931	0.00216956	0.00402575	1.88587e-13	6.80941e-11	BOTH
FBgn0033680	CG13186	2R:7968781-7969562	+	Known	YES	0.000311239	0.730387	0.93784	0.521425	0.947915	0.080149	0.152754	0.95604	1.0779e-52	2.7215e-50	0.000115048	0.00713602	BOTH
FBgn0033698	CG8858	2R:8079879-8086359	-	Known	YES	0.0101438	0.0485852	0.153062	0.620389	0.961699	4.25735e-09	3.16154e-08	0.568221	6.79636e-07	1.72634e-06	0.000216544	0.012283	BOTH
FBgn0033733	CG8834	2R:8307316-8310040	-	Known	YES	0.00417831	0.206277	0.43428	0.499607	0.946451	8.80703e-10	7.0515e-09	0.705407	4.88308e-11	1.69974e-10	1.45537e-06	0.000161826	BOTH
FBgn0033760	CG8785	2R:8528195-8535729	-	Known	YES	0.00325204	0.264956	0.512779	0.726726	0.973383	0.0301725	0.0687258	0.600369	6.76929e-09	2.00505e-08	0.000550025	0.026652	BOTH
FBgn0033774	CG12374	2R:8649618-8651330	+	Known	YES	0.016865	0.010855	0.0468585	0.113912	0.848499	1.33395e-05	6.38302e-05	0.714126	1.8927e-09	5.84215e-09	1.76073e-08	2.98613e-06	BOTH
FBgn0033775	Cyp9h1	2R:8728318-8730063	-	Known	YES	0.0851624	5.63384e-09	1.11811e-07	0.587584	0.95643	1.50679e-12	1.63128e-11	0.845951	1.44126e-27	2.4883e-26	0.000305334	0.0161212	BOTH
FBgn0033787	CG13321	2R:8840617-8843217	+	Known	YES	0.00201342	0.380559	0.646065	0.195489	0.88363	0.000219233	0.000864265	0.656113	1.49748e-05	3.41125e-05	2.32768e-09	4.79531e-07	BOTH
FBgn0033788	CG13323	2R:8932200-8934761	-	Known	YES	0.0194485	0.00619493	0.0295519	0.908446	0.994505	0	0	0.836286	6.10778e-10	1.95836e-09	6.18706e-20	4.61692e-17	BOTH
FBgn0033789	CG13324	2R:8936651-8937161	-	Known	YES	0.000610904	0.629212	0.863932	0.90428	0.994217	1.29896e-14	1.76339e-13	0.863912	1.39254e-12	5.46663e-12	9.79824e-21	8.43654e-18	BOTH
FBgn0033826	CG4734	2R:9184707-9185972	-	Known	YES	0.00492412	0.169972	0.381987	0.794899	0.980849	2.8897e-08	1.95473e-07	0.906914	1.28944e-30	2.96803e-29	4.87511e-09	9.35463e-07	BOTH
FBgn0033865	CG6220	2R:9579212-9580874	-	Known	YES	0.00122453	0.494165	0.753781	0.0891492	0.832897	0.692813	0.782266	0.782437	1.28975e-21	1.17722e-20	0.00117687	0.0485762	BOTH
FBgn0033873	CG6337	2R:9721080-9722601	-	Known	YES	0.0500285	9.64763e-06	0.000103736	0.50382	0.946647	6.12409e-11	5.54771e-10	0.78438	8.0303e-20	5.95402e-19	0.000101562	0.0064227	BOTH
FBgn0033875	CG6357	2R:9727558-9729248	+	Known	YES	0.0185176	0.0075775	0.0349235	0.53432	0.949726	0	0	0.910424	5.86792e-40	3.38565e-38	0.00111309	0.0464784	BOTH
FBgn0033915	CG8485	2R:10123292-10127208	-	Known	YES	0.0970906	4.31641e-10	1.01431e-08	0.213431	0.88959	1.38316e-11	1.33897e-10	0.602213	1.81189e-08	5.19627e-08	0.00025269	0.0138423	BOTH
FBgn0033926	Arc1	2R:10245432-10247802	-	Known	YES	0.000289448	0.739643	0.94444	0.367831	0.926629	0.0368222	0.0808498	0.907988	3.19138e-35	1.18678e-33	6.32082e-06	0.000592886	BOTH
FBgn0033978	Cyp6a23	2R:10763334-10765159	+	Known	YES	0.0381967	0.000115934	0.000950685	0.473905	0.943323	0	0	0.947589	3.12427e-47	3.88566e-45	1.11811e-05	0.000990664	BOTH
FBgn0033980	Cyp6a20	2R:10769623-10771551	+	Known	YES	0.254926	3.12108e-26	4.38518e-24	0.0409728	0.771475	3.53538e-06	1.83588e-05	0.950727	1.08867e-49	1.83706e-47	5.23445e-05	0.00368497	BOTH
FBgn0034140	Lst	2R:12462084-12464091	-	Known	YES	0.00057702	0.63889	0.871969	0.707993	0.971547	3.37508e-14	4.35298e-13	0.96441	1.37443e-55	5.12817e-53	1.80351e-05	0.00151404	BOTH
FBgn0034153	Acp53C14b	2R:12636320-12636965	-	Known	YES	7.22912e-05	0.8681	1	0.841358	0.985363	1.05979e-05	5.13705e-05	0.757921	9.94398e-08	2.6942e-07	8.58293e-14	3.35133e-11	BOTH
FBgn0034160	CG5550	2R:12704094-12705082	+	Known	YES	0.0330077	0.000345689	0.0025007	0.211124	0.88865	0.0498853	0.103925	0.775405	8.09572e-10	2.57121e-09	9.86759e-13	3.09676e-10	BOTH
FBgn0034187	CG6967	2R:12950280-12954051	+	Known	YES	0.00184736	0.400968	0.6659	0.284596	0.907834	0.000313968	0.00120144	0.682205	5.07663e-08	1.40377e-07	4.65587e-08	7.51655e-06	BOTH
FBgn0034221	CG10764	2R:13340904-13343234	+	Known	YES	0.0310026	0.000527807	0.00360826	0.398117	0.931648	0.663128	0.758312	0.873739	2.38242e-30	5.34056e-29	5.89092e-05	0.0040787	BOTH
FBgn0034275	CG5002	2R:13637798-13640719	+	Known	YES	0.00388172	0.223187	0.457687	0.589751	0.956711	8.07497e-06	3.98432e-05	0.860888	3.37772e-25	4.51348e-24	5.51177e-07	6.98435e-05	BOTH
FBgn0034279	CG18635	2R:13655313-13657494	-	Known	YES	0.00723088	0.0961297	0.254959	0.414759	0.935077	0.0048345	0.0141738	0.52939	0.00602619	0.0106488	6.1938e-07	7.73189e-05	BOTH
FBgn0034289	CG10910	2R:13907773-13909911	+	Known	YES	0.0243321	0.00217276	0.0121927	0.221941	0.892293	3.60089e-08	2.40479e-07	0.863454	3.77139e-15	1.80996e-14	3.63003e-17	2.25734e-14	BOTH
FBgn0034291	CG5770	2R:13931551-13932578	-	Known	YES	0.0249822	0.00189163	0.0108279	0.378765	0.928575	0.000358217	0.00135429	0.777982	9.92849e-14	4.25308e-13	8.0825e-09	1.46708e-06	BOTH
FBgn0034292	CG5767	2R:13933891-13934989	-	Known	YES	0.00607372	0.127376	0.312257	0.793391	0.980629	1.46023e-10	1.26837e-09	0.829276	2.91368e-12	1.11551e-11	1.07535e-15	5.47126e-13	BOTH
FBgn0034293	CG14495	2R:13936309-13937427	-	Known	YES	0.0121863	0.0305576	0.107436	0.887932	0.991787	2.22045e-16	3.53964e-15	0.678729	0.000710143	0.00139266	3.25364e-13	1.10361e-10	BOTH
FBgn0034294	Muc55B	2R:13937524-13939612	-	Known	YES	0.014462	0.018401	0.0719666	0.865483	0.989005	2.22199e-06	1.18089e-05	0.609293	1.09223e-08	3.18406e-08	0.00021225	0.0120598	BOTH
FBgn0034295	CG10911	2R:13940055-13941571	-	Known	YES	0.0095205	0.0560868	0.170814	0.915232	0.994823	2.72005e-14	3.54355e-13	0.654443	0.000479488	0.000957778	2.46246e-11	6.51097e-09	BOTH
FBgn0034296	CG10912	2R:13943569-13944570	-	Known	YES	0.00791913	0.0815781	0.225372	0.800944	0.981673	2.03637e-12	2.16963e-11	0.814728	7.37546e-08	2.01717e-07	5.03148e-20	3.92923e-17	BOTH
FBgn0034318	CG14500	2R:14076483-14077159	+	Known	YES	0.0667952	2.81368e-07	4.1881e-06	0.828154	0.983508	0.00202	0.00654335	0.873647	6.91782e-26	9.96997e-25	6.5556e-08	1.00519e-05	BOTH
FBgn0034356	CG10924	2R:14414935-14423254	+	Known	YES	0.107042	4.96088e-11	1.35436e-09	0.511218	0.946718	0.830714	0.886257	0.928364	1.85139e-36	7.58167e-35	1.24881e-08	2.19554e-06	BOTH
FBgn0034390	CG15093	2R:14663174-14664483	-	Known	YES	0.000443594	0.680762	0.90395	0.527024	0.948116	0.000423328	0.00158139	0.727444	4.41587e-16	2.29508e-15	0.000373814	0.0193118	BOTH
FBgn0034407	DptB	2R:14754896-14755400	+	Known	YES	0.000532328	0.6522	0.882711	0.53878	0.949726	2.83493e-05	0.000129612	0.513597	4.52602e-05	9.91544e-05	0.000312644	0.016428	BOTH
FBgn0034436	CG11961	2R:15245037-15250629	+	Known	YES	0.0014711	0.453601	0.717386	0.0893444	0.832897	0.309195	0.436844	0.790378	2.27891e-19	1.61243e-18	2.40969e-05	0.00194239	BOTH
FBgn0034443	cer	2R:15283720-15284277	-	Known	YES	0.00787568	0.0824226	0.227144	0.139445	0.856766	3.5546e-12	3.69917e-11	0.674483	3.05181e-13	1.25897e-12	0.00092358	0.0398123	BOTH
FBgn0034471	Obp56e	2R:15599850-15600437	+	Known	YES	0.168445	4.91142e-17	2.91388e-15	0.054683	0.80245	0.0672514	0.132708	0.720708	1.11889e-15	5.62462e-15	0.000417794	0.0211926	BOTH
FBgn0034480	CG16898	2R:15891125-15892508	-	Known	YES	0.000947036	0.547693	0.798903	0.236649	0.894606	1.18737e-10	1.04216e-09	0.930814	2.86825e-45	2.96357e-43	0.00105154	0.0442608	BOTH
FBgn0034511	GNBP-like3	2R:16413816-16414330	+	Known	YES	0.000348783	0.715256	0.927096	0.932288	0.99566	0	0	0.786942	9.1852e-21	7.54868e-20	0.000253544	0.0138665	BOTH
FBgn0034512	CG18067	2R:16421750-16423340	+	Known	YES	0.00340374	0.254078	0.499594	0.0848149	0.830632	5.42566e-13	6.14668e-12	0.711598	1.4732e-14	6.74346e-14	0.000220384	0.0123676	BOTH
FBgn0034540	Lrt	2R:16533865-16548575	+	Known	YES	0.00323881	0.265932	0.513926	0.367638	0.926602	1.0761e-06	5.95859e-06	0.737704	0.00017976	0.000374115	5.45493e-17	3.21363e-14	BOTH
FBgn0034582	Cht9	2R:16955497-16956791	-	Known	YES	0.0042568	0.202058	0.428439	0.726473	0.973383	9.64198e-11	8.54316e-10	0.829366	1.98916e-25	2.71971e-24	0.000292988	0.015592	BOTH
FBgn0034647	pirk	2R:17548472-17550500	-	Known	YES	0.00100601	0.535478	0.788622	0.793941	0.980707	4.47675e-06	2.29036e-05	0.675531	1.77866e-12	6.92976e-12	0.00030624	0.0161437	BOTH
FBgn0034659	CG4021	2R:17660800-17662381	+	Known	YES	0.00121541	0.495779	0.754988	0.45446	0.941937	9.70018e-07	5.39788e-06	0.813965	8.83007e-23	9.05662e-22	9.62771e-05	0.00612308	BOTH
FBgn0034662	CG13492	2R:17708167-17718914	-	Known	YES	0.00754025	0.0892687	0.241076	0.000559725	0.504783	3.55802e-06	1.84621e-05	0.754972	4.19988e-13	1.7153e-12	1.00254e-07	1.44832e-05	BOTH
FBgn0034664	CG4377	2R:17722953-17723862	-	Known	YES	0.00207156	0.373761	0.638917	0.385879	0.929861	0	0	0.722526	1.60773e-16	8.71046e-16	0.00101496	0.043142	BOTH
FBgn0034711	CG3290	2R:18093510-18095492	-	Known	YES	0.021396	0.00407252	0.0207803	0.709455	0.972214	0.0569019	0.115714	0.759897	3.43023e-16	1.80403e-15	1.17543e-05	0.00103327	BOTH
FBgn0034712	CG3264	2R:18095969-18098270	-	Known	YES	0.00190779	0.393365	0.658776	0.44162	0.938402	1.40646e-05	6.70573e-05	0.669545	0.00022493	0.000463811	8.73961e-12	2.44563e-09	BOTH
FBgn0034715	Oatp58Db	2R:18108685-18111095	-	Known	YES	0.0707362	1.22063e-07	1.94722e-06	0.135169	0.856531	0.00141041	0.00472556	0.909455	4.37521e-39	2.32101e-37	0.000553287	0.0267714	BOTH
FBgn0034723	CG13506	2R:18270639-18281520	+	Known	YES	0.00219799	0.359552	0.623548	0.842118	0.985404	0.813965	0.874361	0.923348	4.71087e-33	1.38158e-31	2.79647e-10	6.43189e-08	BOTH
FBgn0034740	nsr	2R:18538061-18541100	+	Known	YES	0.0385577	0.000107459	0.000887908	0.0402606	0.771133	1.9984e-15	2.92333e-14	0.787324	8.75605e-20	6.46927e-19	6.59609e-05	0.00448374	BOTH
FBgn0034741	CG4269	2R:18484750-18488200	+	Known	YES	0.000216756	0.77367	0.96529	0.528663	0.948654	0.1	0.18217	0.8632	2.20126e-25	2.99264e-24	4.28592e-07	5.51422e-05	BOTH
FBgn0034784	CG9826	2R:18728262-18730500	+	Known	YES	0.00533513	0.153129	0.35542	0.541698	0.949726	0.000706727	0.00252541	0.622238	6.10687e-06	1.43888e-05	3.17303e-07	4.17844e-05	BOTH
FBgn0034900	CG12491	2R:19638169-19638748	+	Known	RARE	0	1	1	0.889536	0.991994	0.164903	0.270344	0.651082	0.0210046	0.03441	4.09749e-14	1.68307e-11	BASELINE
FBgn0034942	CG13566	2R:19849000-19850100	-	Known	YES	0.0216535	0.0038535	0.0198133	0.543436	0.949726	0.035296	0.0781945	0.606241	0.00258972	0.00477005	9.19322e-10	1.9789e-07	BOTH
FBgn0035094	CG9380	2R:21071151-21142841	-	Known	YES	3.60778e-05	0.906607	1	0.17056	0.870482	0	0	0.687445	8.19023e-08	2.23219e-07	1.4534e-08	2.51573e-06	BOTH
FBgn0035176	CG13905	3L:902898-903810	+	Known	YES	0.0454662	2.51634e-05	0.000246424	0.100178	0.84066	0.000486852	0.00179769	0.795453	3.85562e-20	2.95935e-19	3.60271e-05	0.00268843	BOTH
FBgn0035206	CG9186	3L:1311719-1313377	-	Known	YES	0.0422153	4.98175e-05	0.000449575	0.431512	0.937679	0.179804	0.289001	0.917782	1.71835e-36	7.07134e-35	1.36013e-06	0.000153177	BOTH
FBgn0035227	Iml1	3L:1523414-1534034	-	Known	YES	6.36727e-05	0.876144	1	0.261632	0.90079	1.18029e-06	6.49903e-06	0.885583	6.28385e-33	1.81907e-31	0.000118507	0.00730177	BOTH
FBgn0035355	CG16985	3L:2599297-2600242	+	Known	YES	0.0507589	8.27435e-06	9.01241e-05	0.406632	0.932987	0	0	0.54352	3.74897e-06	8.98383e-06	0.000319346	0.0167296	BOTH
FBgn0035409	CG14963	3L:3171614-3172545	-	Known	YES	0.0157099	0.0139779	0.057862	0.606899	0.958746	0	0	0.865634	4.15415e-31	1.00719e-29	0.000696975	0.032017	BOTH
FBgn0035611	CG13285	3L:5527068-5528859	-	Known	YES	0.0238578	0.00240417	0.013263	0.612615	0.960657	0.000337519	0.00128384	0.716178	1.49287e-13	6.30893e-13	3.19336e-05	0.00243159	BOTH
FBgn0035619	CG10592	3L:5585841-5588372	-	Known	YES	0.0174528	0.00954955	0.0422774	0.605465	0.95855	0.833149	0.888008	0.823537	1.92971e-21	1.71247e-20	2.91622e-06	0.000306021	BOTH
FBgn0035620	CG5150	3L:5588642-5590522	+	Known	YES	0.000393956	0.698226	0.915876	0.91213	0.994818	0.188131	0.299631	0.772593	1.03647e-15	5.22044e-15	8.98585e-07	0.000107383	BOTH
FBgn0035623	mthl2	3L:5597890-5600290	+	Known	YES	0.0629624	6.32737e-07	8.74375e-06	0.0158448	0.730615	0.574471	0.686902	0.722536	2.29782e-13	9.56264e-13	1.17399e-05	0.00103327	BOTH
FBgn0035665	Jon65Aiii	3L:6043857-6044790	+	Known	YES	0.0274599	0.00111719	0.00691271	0.622876	0.961699	7.21309e-05	0.000309348	0.722442	5.41315e-16	2.79012e-15	0.000533247	0.0260647	BOTH
FBgn0035666	Jon65Aii	3L:6045421-6046315	+	Known	YES	0.0213853	0.0040819	0.020825	0.775456	0.978388	9.90457e-10	7.8758e-09	0.969009	1.2306e-58	6.88725e-56	2.30213e-05	0.00187181	BOTH
FBgn0035667	Jon65Ai	3L:6046593-6047543	-	Known	YES	0.00531818	0.153785	0.356414	0.203235	0.885414	0.0033309	0.0102127	0.73707	9.71712e-14	4.16785e-13	3.8584e-06	0.000384466	BOTH
FBgn0035743	CG15829	3L:7122003-7122773	+	Known	YES	0.029301	0.00075635	0.00492691	0.839791	0.984832	2.63816e-10	2.23488e-09	0.782425	0.0196008	0.0322771	7.71333e-27	1.03605e-23	BOTH
FBgn0035779	CG8562	3L:7391385-7393012	+	Known	YES	0.028541	0.000888384	0.00565427	0.715779	0.972748	2.66987e-10	2.2606e-09	0.869019	2.8217e-29	5.73911e-28	3.86077e-05	0.00285561	BOTH
FBgn0035780	CG18417	3L:7393170-7394771	+	Known	YES	0.0117311	0.0338573	0.116191	0.14514	0.859346	0.000285035	0.00110003	0.960201	8.66152e-55	3.02973e-52	0.000120132	0.00738835	BOTH
FBgn0035781	CG8560	3L:7395432-7397281	-	Known	YES	0.00105961	0.524796	0.779384	0.0530139	0.798703	0	0	0.787593	3.1164e-10	1.02166e-09	2.06729e-13	7.38506e-11	BOTH
FBgn0035806	PGRP-SD	3L:7644280-7645000	+	Known	YES	3.56639e-06	0.970576	1	0.526293	0.948062	1.43688e-05	6.84242e-05	0.674743	4.38542e-09	1.32003e-08	1.10843e-06	0.000128349	BOTH
FBgn0035875	Cpr66Cb	3L:8329772-8331695	+	Known	YES	0.000594788	0.633773	0.867984	0.162919	0.868589	0.0902131	0.167912	0.804648	1.38432e-21	1.25637e-20	7.35816e-05	0.00491227	BOTH
FBgn0035886	Jon66Ci	3L:8384640-8385477	+	Known	YES	0.0419059	5.31633e-05	0.00047606	0.500962	0.946647	0.305502	0.432701	0.756097	2.03466e-16	1.09178e-15	2.68572e-05	0.0021121	BOTH
FBgn0035933	CG13309	3L:8803495-8804365	+	Known	YES	0.0371708	0.000143854	0.00115399	0.18685	0.880184	8.62783e-11	7.67904e-10	0.903485	2.21791e-32	6.07978e-31	3.71279e-07	4.85119e-05	BOTH
FBgn0035976	PGRP-LC	3L:9331910-9341436	+	Known	YES	0.00808237	0.078487	0.218849	0.303809	0.911631	6.1472e-06	3.08758e-05	0.88981	1.19549e-22	1.21136e-21	2.95624e-13	1.01297e-10	BOTH
FBgn0035977	PGRP-LF	3L:9342709-9344589	+	Known	YES	0.00148182	0.451959	0.716241	0.128808	0.855742	8.88178e-16	1.34255e-14	0.672825	1.37235e-12	5.38861e-12	0.000446998	0.0224033	BOTH
FBgn0036015	CG3088	3L:9593590-9594425	-	Known	YES	0.00482697	0.174255	0.388545	0.00322665	0.676853	0.322921	0.451133	0.810793	1.89197e-20	1.50266e-19	5.52738e-06	0.00052432	BOTH
FBgn0036022	CG8329	3L:9631212-9632121	+	Known	YES	0.00283878	0.297685	0.552939	0.915881	0.994823	3.69429e-05	0.00016519	0.958682	5.10213e-51	1.05759e-48	2.31402e-06	0.000249053	BOTH
FBgn0036024	CG18180	3L:9634113-9635013	+	Known	YES	0.0163626	0.012115	0.0513338	0.954722	0.997891	1.29623e-05	6.21228e-05	0.774741	2.71865e-17	1.57591e-16	9.12876e-06	0.000819636	BOTH
FBgn0036181	Muc68Ca	3L:11603678-11613201	-	Known	YES	5.43926e-06	0.963666	1	0.435643	0.937679	0.00512132	0.0149066	0.728142	4.58944e-17	2.60767e-16	0.00118475	0.0486951	BOTH
FBgn0036262	CG6910	3L:12178084-12180960	+	Known	YES	0.00198122	0.384399	0.649802	0.605728	0.95855	0	0	0.801643	6.00018e-23	6.27292e-22	0.000611654	0.0286462	BOTH
FBgn0036320	CG10943	3L:12854817-12856020	-	Known	YES	0.0301015	0.000638528	0.00425432	0.314493	0.914048	0	0	0.781296	1.24047e-15	6.20976e-15	1.9841e-07	2.71944e-05	BOTH
FBgn0036321	CG14120	3L:12878139-12882344	+	Known	YES	8.5068e-05	0.857033	1	0.61158	0.960143	5.9835e-08	3.88621e-07	0.874643	2.81588e-27	4.69733e-26	5.26922e-07	6.70229e-05	BOTH
FBgn0036324	CG12520	3L:12894347-12895837	-	Known	YES	0.00111051	0.515001	0.771226	0.627326	0.961717	0.559308	0.67415	0.799194	3.48596e-20	2.68853e-19	2.24392e-05	0.00183335	BOTH
FBgn0036369	CG10089	3L:13458652-13467887	-	Known	YES	0.0254239	0.00172187	0.0100105	0.582803	0.955603	0.134361	0.229919	0.849678	6.06177e-29	1.1876e-27	0.000833297	0.0368186	BOTH
FBgn0036381	CG8745	3L:13853127-13860005	-	Known	YES	0.000369759	0.707201	0.921662	0.963388	0.998005	0.546881	0.663242	0.767842	2.16726e-17	1.26722e-16	2.65226e-05	0.00210054	BOTH
FBgn0036422	CG3868	3L:14393869-14395825	-	Known	YES	0.0227551	0.00304318	0.0162129	0.391096	0.930074	2.32389e-08	1.58798e-07	0.734363	3.07897e-14	1.37288e-13	1.22899e-05	0.00107473	BOTH
FBgn0036428	Gbs-70E	3L:14534037-14544075	-	Known	YES	0.00907513	0.0621909	0.184436	0.149265	0.862648	0	0	0.657446	2.95725e-11	1.04531e-10	0.000240889	0.0133263	BOTH
FBgn0036449	bmm	3L:14769596-14779512	-	Known	YES	0.000362601	0.709919	0.923495	0.784097	0.979332	0	0	0.707198	7.19559e-13	2.88718e-12	2.81995e-05	0.00219708	BOTH
FBgn0036489	CG7011	3L:15153976-15156728	-	Known	YES	0.000693695	0.606885	0.847226	0.414116	0.935077	0.00249512	0.00791141	0.836901	1.12093e-26	1.7622e-25	0.000429005	0.0216632	BOTH
FBgn0036610	CG13058	3L:16321941-16322634	+	Known	RARE	0.00223597	0.35543	0.618666	0.935734	0.99566	0.835358	0.889741	0.278671	1	1	0.000164773	0.00970714	ETOH
FBgn0036619	Cpr72Ec	3L:16358994-16360440	-	Known	YES	0.023623	0.00252779	0.0138373	0.165918	0.869121	0.0662864	0.131089	0.93838	2.81813e-41	1.90792e-39	2.31925e-07	3.14034e-05	BOTH
FBgn0036738	CG7542	3L:17542926-17544080	+	Known	YES	0.00275592	0.304855	0.561702	0.649983	0.964841	0.733525	0.814348	0.887932	1.26893e-34	4.35246e-33	0.000529245	0.0260206	BOTH
FBgn0036766	CG5506	3L:17876749-17877476	-	Known	YES	3.97932e-07	0.990169	1	0.80621	0.98219	1.35263e-07	8.44848e-07	0.779699	2.80062e-11	9.92243e-11	1.96537e-11	5.23786e-09	BOTH
FBgn0036767	CG16775	3L:17879048-17879745	-	Known	YES	2.99002e-05	0.914944	1	0.535506	0.949726	0.145747	0.244908	0.86966	1.11051e-27	1.9392e-26	3.44491e-06	0.000350905	BOTH
FBgn0036824	CG3902	3L:18886220-18891393	-	Known	YES	0.0354827	0.000205216	0.00157692	0.32334	0.916743	0.00839709	0.023056	0.77018	4.94613e-18	3.06951e-17	5.03502e-05	0.0035595	BOTH
FBgn0036835	CG14075	3L:18978061-18978734	+	Known	YES	0.000116483	0.833035	1	0.983293	0.999388	0.000891848	0.00312245	0.6035	4.44885e-08	1.2368e-07	0.000122428	0.00748099	BOTH
FBgn0036836	CG11619	3L:18979005-18981423	-	Known	YES	0.0346162	0.0002463	0.0018536	0.321886	0.916009	0.244953	0.36673	0.847064	1.86861e-27	3.18356e-26	0.000222256	0.0123982	BOTH
FBgn0036837	CG18135	3L:18983126-18991383	-	Known	YES	0.00230714	0.347875	0.610422	0.724723	0.973383	0.0608098	0.122056	0.83559	1.37851e-21	1.25177e-20	3.59784e-07	4.71936e-05	BOTH
FBgn0036875	CG9449	3L:19485153-19490823	-	Known	YES	0.000627653	0.624549	0.860475	0.330073	0.917198	1.03006e-07	6.51368e-07	0.859529	2.46511e-24	2.99813e-23	1.79441e-07	2.47968e-05	BOTH
FBgn0036876	CG9451	3L:19491297-19493898	-	Known	YES	0.00169477	0.42115	0.686983	0.584373	0.955603	2.22045e-16	3.53964e-15	0.87045	2.75641e-25	3.70685e-24	5.51648e-08	8.65623e-06	BOTH
FBgn0036945	Ssk	3L:20181622-20182879	+	Known	YES	0.0384551	0.000109801	0.000905257	0.380427	0.928629	4.06472e-09	3.02306e-08	0.870725	1.42858e-25	1.98805e-24	8.45845e-08	1.25679e-05	BOTH
FBgn0036948	CG7298	3L:20195170-20196787	-	Known	YES	0.00141505	0.462339	0.725721	0.32959	0.917198	0.000303308	0.0011636	0.824108	1.96393e-11	7.04282e-11	4.38099e-16	2.33514e-13	BOTH
FBgn0036995	atk	3L:20447790-20457962	-	Known	YES	0.0153421	0.0151548	0.061707	0.107159	0.845392	0.448927	0.575463	0.866075	1.80504e-29	3.75082e-28	9.05588e-05	0.00581447	BOTH
FBgn0036996	mag	3L:20453783-20455374	+	Known	YES	0.00940226	0.0576429	0.174328	0.400238	0.931648	0.00310137	0.00958212	0.907768	6.53467e-27	1.05194e-25	1.68286e-12	5.09103e-10	BOTH
FBgn0037065	CG12974	3L:21274852-21279062	-	Known	YES	0.13023	2.96674e-13	1.09838e-11	0.0630077	0.809468	1.20437e-12	1.31661e-11	0.694402	3.33723e-10	1.0915e-09	1.0789e-06	0.000125362	BOTH
FBgn0037115	CG11249	3L:21665239-21667618	+	Known	YES	0.18806	4.87306e-19	3.58854e-17	0.00026197	0.366452	0.000713594	0.00254724	0.79655	8.37396e-23	8.59931e-22	0.000945762	0.0405085	BOTH
FBgn0037419	Osi12	3R:2104253-2108217	+	Known	YES	0.000837702	0.571777	0.82021	0.532646	0.949611	0.960537	0.97489	0.819453	8.36857e-21	6.91308e-20	2.19357e-06	0.000237586	BOTH
FBgn0037443	Dmtn	3R:2214884-2231617	-	Known	YES	0.00057126	0.640569	0.873681	0.106485	0.844994	0	0	0.748081	1.57542e-14	7.18981e-14	3.6213e-06	0.000364082	BOTH
FBgn0037562	CG11671	3R:4113598-4114335	+	Known	YES	0.00479361	0.175755	0.390938	0.767059	0.977961	1.33548e-08	9.39538e-08	0.780074	2.76938e-05	6.17378e-05	5.27399e-20	4.02501e-17	BOTH
FBgn0037612	CG8112	3R:4538655-4540985	+	Known	YES	0.00448428	0.190389	0.411991	0.892642	0.9921	5.70988e-13	6.4521e-12	0.694611	2.40642e-14	1.08104e-13	0.000747478	0.0338279	BOTH
FBgn0037635	CG9837	3R:4633401-4639301	-	Known	YES	5.09989e-05	0.889065	1	0.0944565	0.833784	0	0	0.706466	1.4304e-13	6.05098e-13	8.87362e-05	0.00571931	BOTH
FBgn0037684	CG8129	3R:5191120-5193485	+	Known	YES	0.0167234	0.0111958	0.0480763	0.745245	0.976446	2.16057e-08	1.48242e-07	0.786316	1.0003e-20	8.19869e-20	0.000260964	0.0141799	BOTH
FBgn0037724	Fst	3R:5470700-5471876	-	Known	YES	0.00101867	0.532921	0.786513	0.538574	0.949726	1.10666e-10	9.7591e-10	0.782899	6.19136e-18	3.8064e-17	7.93057e-06	0.000723665	BOTH
FBgn0037782	Npc2d	3R:5881078-5881805	-	Known	YES	3.44993e-07	0.990847	1	0.887042	0.991787	1.15641e-08	8.17499e-08	0.759912	4.65043e-12	1.74971e-11	5.12427e-09	9.72164e-07	BOTH
FBgn0037801	CG3999	3R:6077240-6080990	+	Known	YES	0.00136086	0.471046	0.733422	0.573985	0.955118	4.63907e-12	4.74825e-11	0.624896	1.59939e-10	5.36057e-10	0.000994329	0.0423726	BOTH
FBgn0037897	CG5270	3R:7247814-7255691	+	Known	YES	0.000859855	0.566735	0.815622	0.651877	0.965029	1.66533e-15	2.4586e-14	0.601464	6.08751e-09	1.80981e-08	0.000545859	0.0265282	BOTH
FBgn0037906	PGRP-LB	3R:7278571-7286274	-	Known	YES	0.00320974	0.268092	0.516557	0.809029	0.982258	1.82692e-06	9.8165e-06	0.682758	4.77348e-09	1.4317e-08	4.13349e-07	5.35884e-05	BOTH
FBgn0037989	ATP8B	3R:7894097-7916334	-	Known	YES	0.0243694	0.00215556	0.0121104	0.289596	0.909259	0.0368111	0.0808362	0.726631	0.000319992	0.000649972	2.0046e-16	1.14092e-13	BOTH
FBgn0037996	CG4830	3R:8033881-8036082	-	Known	YES	3.14787e-05	0.912737	1	0.742327	0.975663	3.9706e-07	2.32962e-06	0.544035	3.89358e-05	8.5814e-05	4.61818e-05	0.00332786	BOTH
FBgn0038020	GstD9	3R:8191885-8193286	-	Known	YES	0.0290405	0.000799223	0.00515618	0.613691	0.961052	5.29341e-05	0.000231786	0.925256	8.5729e-44	7.49682e-42	0.00120274	0.0493014	BOTH
FBgn0038071	Dtg	3R:8473780-8478632	+	Known	YES	5.07538e-05	0.889331	1	0.132321	0.855742	2.14447e-06	1.14258e-05	0.618763	4.88691e-10	1.58004e-09	0.000785248	0.0351582	BOTH
FBgn0038074	Gnmt	3R:8500330-8501806	+	Known	YES	0.010126	0.0487842	0.153531	0.534871	0.949726	5.08719e-10	4.19212e-09	0.681915	4.01277e-10	1.30507e-09	3.74132e-06	0.00037391	BOTH
FBgn0038083	CG5999	3R:8567680-8569402	-	Known	YES	0.0334326	0.000316072	0.00230933	0.429202	0.937679	1.57236e-06	8.5266e-06	0.875142	1.4847e-32	4.134e-31	0.000641656	0.0299261	BOTH
FBgn0038098	CG7381	3R:8793497-8803193	-	Known	YES	0.00161648	0.432095	0.697517	0.410269	0.933988	0.00681499	0.0191908	0.723917	1.06317e-08	3.10256e-08	6.76094e-10	1.48387e-07	BOTH
FBgn0038136	CG8774	3R:9124490-9128056	+	Known	YES	0.00895704	0.0639248	0.188232	0.910373	0.994818	0.0612596	0.122812	0.820439	4.18832e-21	3.57145e-20	2.97556e-06	0.000310308	BOTH
FBgn0038147	CCHa2	3R:9214781-9220919	-	Known	YES	0.0285551	0.000885745	0.00563961	0.805454	0.982053	0	0	0.694934	3.91209e-14	1.7283e-13	0.00055493	0.0267738	BOTH
FBgn0038168	omd	3R:9505162-9512932	-	Known	YES	0.00975718	0.0531038	0.163828	0.966384	0.998005	0.00823321	0.0226562	0.540731	0.00038411	0.000773797	6.46623e-06	0.000603155	BOTH
FBgn0038209	CG9722	3R:9978607-9979551	-	Known	YES	0.0848721	5.99544e-09	1.18637e-07	0.54381	0.949804	0.0213335	0.0515629	0.774032	7.03722e-13	2.82667e-12	2.63197e-09	5.35645e-07	BOTH
FBgn0038292	CG3987	3R:10965680-10967437	+	Known	YES	0.0912443	1.52514e-09	3.31698e-08	0.178235	0.877312	0	0	0.779412	1.26609e-11	4.61371e-11	4.95999e-11	1.2523e-08	BOTH
FBgn0038299	Spn88Eb	3R:11032425-11034484	-	Known	YES	0.0232384	0.0027443	0.0148443	0.922791	0.995075	2.03556e-09	1.56451e-08	0.665593	3.5546e-11	1.24909e-10	0.000107517	0.00672332	BOTH
FBgn0038313	CG4338	3R:11101244-11102196	+	Known	YES	0.34467	6.07692e-37	2.12565e-34	0.797797	0.981397	0.400225	0.528823	0.499693	0.0296925	0.0476248	7.48292e-07	9.17067e-05	BOTH
FBgn0038353	CG5399	3R:11520963-11522864	+	Known	YES	0.0340004	0.000280419	0.00207915	0.282256	0.907173	7.70319e-06	3.81658e-05	0.785776	7.88817e-16	4.00794e-15	1.35609e-07	1.93776e-05	BOTH
FBgn0038416	CG17930	3R:12153571-12155344	+	Known	YES	0.00103938	0.528783	0.782709	0.659591	0.965599	4.35441e-11	3.99743e-10	0.699715	2.31228e-06	5.63921e-06	5.13824e-11	1.28763e-08	BOTH
FBgn0038449	CG17562	3R:12441031-12442876	+	Known	YES	0.00831308	0.0743306	0.21028	0.432552	0.937679	0.0571856	0.116178	0.841877	1.17556e-26	1.84723e-25	0.000193557	0.0110727	BOTH
FBgn0038450	CG17560	3R:12443672-12445600	+	Known	YES	0.00322491	0.266962	0.515146	0.991379	0.999439	0.017056	0.0426044	0.858986	6.85159e-29	1.3361e-27	0.000166214	0.0097749	BOTH
FBgn0038481	CG17475	3R:12955061-12956148	-	Known	YES	0.0707779	1.2099e-07	1.93294e-06	0.542302	0.949726	1.35519e-09	1.06102e-08	0.791747	4.12341e-18	2.57896e-17	2.80565e-06	0.000296269	BOTH
FBgn0038484	CG5246	3R:12961833-12962917	+	Known	YES	0.0843731	6.6719e-09	1.30942e-07	0.594571	0.95702	3.29927e-10	2.76977e-09	0.618831	4.74212e-10	1.53425e-09	0.000795771	0.0355435	BOTH
FBgn0038505	CG17283	3R:13233598-13235182	+	Known	YES	0.0359251	0.000186965	0.00145465	0.0268612	0.765253	0.977929	0.986154	0.568135	4.37326e-07	1.12756e-06	0.000299372	0.0158563	BOTH
FBgn0038530	AttD	3R:13450990-13451808	+	Known	YES	0.00989337	0.0514636	0.160015	0.657955	0.965599	0.0349438	0.077582	0.643554	7.18049e-10	2.29137e-09	9.2453e-05	0.00591347	BOTH
FBgn0038613	Vha100-4	3R:14212563-14215527	-	Known	YES	6.31761e-05	0.876625	1	0.142458	0.858354	5.39905e-05	0.000236134	0.795934	0.00899279	0.0155171	8.66843e-28	1.38612e-24	BOTH
FBgn0038638	CG7702	3R:14495112-14500401	+	Known	YES	0.00450809	0.189214	0.410002	0.218824	0.891504	0.137632	0.234187	0.640006	1.21111e-09	3.79059e-09	8.64748e-05	0.00560584	BOTH
FBgn0038652	CG7720	3R:14584958-14620891	-	Known	YES	0.0195389	0.00607511	0.0290974	0.0810453	0.827899	0.141674	0.23955	0.780118	1.88637e-19	1.34403e-18	0.000105048	0.0066058	BOTH
FBgn0038718	CG17752	3R:15435947-15438159	+	Known	YES	0.00856385	0.0700783	0.201665	0.932821	0.99566	1.64538e-08	1.14461e-07	0.924983	1.51711e-40	9.38207e-39	2.91819e-05	0.00225271	BOTH
FBgn0038719	CG16727	3R:15439103-15441506	+	Known	YES	0.0188494	0.0070519	0.032935	0.433697	0.937679	0	0	0.886543	1.98175e-33	6.01692e-32	0.000177053	0.010304	BOTH
FBgn0038740	CG4562	3R:15691139-15701400	-	Known	YES	0.00156297	0.439824	0.704888	0.869823	0.989718	3.74507e-06	1.93549e-05	0.512516	9.74469e-06	2.25378e-05	0.00104791	0.0442608	BOTH
FBgn0038756	CG4783	3R:15774165-15774629	+	Known	YES	0.234779	5.30871e-24	6.32151e-22	0.245623	0.894987	1.49236e-12	1.61722e-11	0.942065	6.67806e-46	7.42547e-44	2.98922e-05	0.00229347	BOTH
FBgn0038790	MtnC	3R:16186030-16186356	+	Known	YES	0.00612701	0.125714	0.309266	0.959836	0.99797	0	0	0.802943	1.47584e-23	1.64374e-22	0.00105415	0.0443032	BOTH
FBgn0038818	Nep4	3R:16478289-16485626	-	Known	YES	0.0561821	2.64359e-06	3.2222e-05	0.588615	0.956711	3.45446e-06	1.79602e-05	0.671896	5.10695e-12	1.91675e-11	0.000217695	0.0123271	BOTH
FBgn0038828	CG17270	3R:16642167-16644651	-	Known	YES	0.0050452	0.1648	0.373972	0.0358336	0.771133	0.00979143	0.0263671	0.596115	0.00281747	0.00516716	2.59864e-09	5.32088e-07	BOTH
FBgn0038846	CG5697	3R:16841671-16842842	+	Known	YES	0.00943556	0.0572001	0.173355	0.187262	0.880184	0.290864	0.416934	0.914154	1.47808e-38	7.41913e-37	8.0963e-05	0.00535184	BOTH
FBgn0038873	CG5892	3R:17068340-17071140	+	Known	YES	0.00812221	0.0777518	0.217286	0.559743	0.95229	0.908836	0.940666	0.333828	0.365745	0.475962	0.000546688	0.0265286	BOTH
FBgn0038973	Pebp1	3R:18291756-18292401	+	Known	YES	0.0179575	0.00855687	0.0386885	0.630225	0.961805	0.308066	0.435506	0.587059	8.56013e-06	1.99092e-05	6.19295e-06	0.000582519	BOTH
FBgn0039064	CG4467	3R:19053449-19074625	-	Known	YES	0.00765224	0.0869172	0.236541	0.582957	0.955603	0.913345	0.943849	0.645898	9.00914e-10	2.85161e-09	6.46691e-05	0.00440485	BOTH
FBgn0039073	CG4408	3R:19187611-19189296	-	Known	YES	0.0274079	0.00112958	0.00697777	0.147035	0.860501	1.47016e-12	1.59419e-11	0.877022	1.67328e-29	3.49216e-28	8.78632e-06	0.000793131	BOTH
FBgn0039091	CG10182	3R:19412842-19415541	-	Known	YES	0.0491375	1.16346e-05	0.000122665	0.753753	0.977119	0.957933	0.97334	0.687348	1.60581e-12	6.27595e-12	0.00011569	0.00714131	BOTH
FBgn0039099	GILT2	3R:19504617-19505577	+	Known	YES	0.107106	4.89229e-11	1.33672e-09	0.514794	0.947304	2.62346e-13	3.08061e-12	0.907635	3.17788e-39	1.70197e-37	0.00100536	0.0427884	BOTH
FBgn0039109	CG10365	3R:19549053-19557221	+	Known	YES	0.0126183	0.0277342	0.0996377	0.643623	0.964347	0.531202	0.649412	0.731697	5.32983e-17	3.01052e-16	0.00079597	0.0355435	BOTH
FBgn0039154	Npc2f	3R:19963617-19966658	+	Known	YES	0.00493917	0.169319	0.380978	0.364427	0.925635	0	0	0.765147	4.06265e-17	2.32053e-16	2.48681e-05	0.00198826	BOTH
FBgn0039203	CG13618	3R:20350516-20353255	+	Known	YES	0.149785	3.60313e-15	1.65066e-13	0.0363844	0.771133	0.0416708	0.0895113	0.881001	3.03731e-30	6.72777e-29	9.68364e-06	0.000867138	BOTH
FBgn0039241	CG11089	3R:20702767-20707200	+	Known	YES	0.00785586	0.0828111	0.227878	0.566727	0.95288	1.33626e-12	1.4537e-11	0.583759	3.89808e-08	1.08817e-07	0.00054589	0.0265282	BOTH
FBgn0039250	Mink	3R:20748195-20750882	+	Known	YES	0.00741925	0.0918869	0.246333	0.444122	0.939157	4.63862e-11	4.23749e-10	0.709333	5.13495e-10	1.65609e-09	1.16656e-07	1.67407e-05	BOTH
FBgn0039310	CG11878	3R:21099559-21100959	+	Known	YES	0.0180647	0.00835992	0.0379206	0.511753	0.946797	0	0	0.811008	9.18963e-24	1.05248e-22	0.000494925	0.0245126	BOTH
FBgn0039312	CG10514	3R:21104149-21105568	-	Known	YES	0.0133832	0.0233783	0.0872076	0.28182	0.907173	0.00104648	0.00361111	0.714845	8.68975e-16	4.39858e-15	0.000813639	0.0361881	BOTH
FBgn0039313	CG11892	3R:21107270-21108959	+	Known	YES	0.00367761	0.235789	0.475943	0.479354	0.943323	0.0263066	0.0613777	0.732268	6.37819e-16	3.26344e-15	0.000187996	0.0108283	BOTH
FBgn0039378	alpha4GT2	3R:21657952-21668600	+	Known	YES	0.245111	3.87454e-25	4.9283e-23	0.16656	0.869834	0.095882	0.176197	0.822245	2.4681e-25	3.34188e-24	0.000708672	0.0324331	BOTH
FBgn0039419	CG12290	3R:22055970-22060422	+	Known	YES	0.0216963	0.00381829	0.0196533	0.328976	0.917198	1.11022e-15	1.66469e-14	0.589592	8.10426e-07	2.04586e-06	3.91121e-05	0.00287393	BOTH
FBgn0039452	CG14245	3R:22554449-22555063	+	Known	YES	0.0118181	0.0331992	0.114483	0.977946	0.999388	1.88187e-11	1.79077e-10	0.808784	4.61878e-23	4.88345e-22	0.000283162	0.0152093	BOTH
FBgn0039453	CG6403	3R:22561139-22562029	-	Known	YES	0.00131659	0.478355	0.740375	0.733683	0.974452	3.34501e-08	2.24553e-07	0.755541	6.85137e-17	3.82619e-16	5.75551e-05	0.00400975	BOTH
FBgn0039470	CG6296	3R:22828958-22831191	-	Known	YES	3.28147e-07	0.991073	1	0.117749	0.851603	0.251666	0.374476	0.92385	2.98537e-30	6.61707e-29	5.66355e-13	1.84643e-10	BOTH
FBgn0039471	CG6295	3R:22831621-22832777	-	Known	YES	0.0113474	0.0369262	0.124098	0.223547	0.892487	0.445359	0.572178	0.936479	1.60746e-39	8.92209e-38	3.5657e-08	5.81244e-06	BOTH
FBgn0039474	CG6283	3R:22845960-22847100	-	Known	YES	0.00627189	0.121315	0.301692	0.66401	0.965644	0.0226476	0.0542044	0.916105	1.95141e-22	1.93928e-21	1.47657e-19	1.07789e-16	BOTH
FBgn0039475	CG6277	3R:22847793-22848939	-	Known	YES	0.00024218	0.761144	0.957569	0.795987	0.981138	0.425516	0.5534	0.850776	5.73122e-11	1.98509e-10	9.33811e-21	8.25194e-18	BOTH
FBgn0039521	CG5402	3R:23327812-23328678	-	Known	YES	0.000743591	0.59423	0.837394	0.0388153	0.771133	0.302132	0.429014	0.96015	1.90707e-53	5.38146e-51	2.3293e-05	0.00188932	BOTH
FBgn0039593	Sid	3R:24496426-24497743	+	Known	YES	0.0141394	0.019763	0.0761755	0.553719	0.951188	0	0	0.849208	3.20836e-27	5.31508e-26	0.000115326	0.00713602	BOTH
FBgn0039629	CG11842	3R:24878402-24879635	+	Known	YES	0.000477027	0.669635	0.896575	0.00125496	0.569307	4.21885e-15	5.9661e-14	0.837343	3.45037e-26	5.16325e-25	0.000222782	0.0124063	BOTH
FBgn0039685	Obp99b	3R:25541976-25542618	-	Known	YES	0.00716865	0.0975779	0.257625	0.650888	0.964855	0.0143429	0.0366203	0.764958	7.77447e-15	3.63957e-14	5.90981e-07	7.46058e-05	BOTH
FBgn0039703	CG7829	3R:25642460-25643486	-	Known	YES	0.104231	9.15827e-11	2.40449e-09	0.150274	0.863364	0.231572	0.351797	0.794332	5.29225e-12	1.98363e-11	5.2737e-12	1.51826e-09	BOTH
FBgn0039756	CG9743	3R:26022082-26028720	-	Known	YES	0.00100142	0.536411	0.789338	0.110576	0.848255	0.180826	0.290394	0.711658	6.21776e-09	1.84707e-08	7.56511e-09	1.38654e-06	BOTH
FBgn0039760	CG9682	3R:26076650-26078552	+	Known	YES	0.00408743	0.211292	0.441078	0.526953	0.948116	2.55906e-07	1.53922e-06	0.87075	1.72754e-31	4.35843e-30	0.000431669	0.021765	BOTH
FBgn0039761	CG18404	3R:26078904-26079819	+	Known	YES	0.00709055	0.0994287	0.261198	0.493297	0.944901	2.22045e-16	3.53964e-15	0.916188	1.08058e-27	1.8899e-26	1.28483e-13	4.90281e-11	BOTH
FBgn0039768	CG15533	3R:26254542-26257084	+	Known	YES	0.0316436	0.00046099	0.00320697	0.480849	0.943323	0	0	0.690064	5.30315e-12	1.9875e-11	4.0423e-05	0.00296377	BOTH
FBgn0039778	Jon99Fi	3R:26314685-26315617	+	Known	YES	0.00187646	0.397281	0.662533	0.862063	0.988083	0.00188431	0.00613995	0.913921	2.89491e-30	6.42931e-29	1.14306e-10	2.68418e-08	BOTH
FBgn0039784	CG9698	3R:26340546-26342641	+	Known	YES	0.0198809	0.00564272	0.0273416	0.0401261	0.771133	0.0046006	0.0135758	0.866799	7.76e-25	1.00031e-23	6.69006e-08	1.02115e-05	BOTH
FBgn0039817	CG15553	3R:26924590-26926891	-	Known	YES	0.000417706	0.68972	0.910123	0.789426	0.980629	0	0	0.889124	4.29638e-32	1.1551e-30	1.69626e-05	0.00143477	BOTH
FBgn0039818	CG11318	3R:26932084-26934913	-	Known	YES	0.0283721	0.000920739	0.00583697	0.629061	0.961805	2.05649e-07	1.25346e-06	0.566747	1.0997e-06	2.75047e-06	0.000167842	0.0098534	BOTH
FBgn0039827	CG1544	3R:27022638-27029444	+	Known	YES	0.049779	1.01671e-05	0.000108576	0.723216	0.973383	0.972575	0.982525	0.707815	5.58859e-15	2.65176e-14	0.000544159	0.0265282	BOTH
FBgn0039858	CycG	3R:27422364-27438386	-	Known	YES	0.0073318	0.0938309	0.250325	0.810161	0.982258	0.956203	0.972247	0.706588	3.28308e-08	9.23333e-08	2.72855e-09	5.48651e-07	BOTH
FBgn0039872	salt	3R:27577547-27580427	-	Known	YES	0.0183679	0.00782742	0.035849	0.515556	0.947326	0	0	0.788457	4.36139e-22	4.18803e-21	0.00104318	0.0441738	BOTH
FBgn0039941	CG17167	XHet:47119-59962	+	Known	YES	0	1	1	0.696547	0.970217	0	0	0.495271	3.76558e-05	8.30802e-05	0.00105182	0.0442608	BOTH
FBgn0039972	CG17018	2L:22308755-22368796	+	Known	YES	0.167418	6.2345e-17	3.65671e-15	0.299639	0.911085	0.0146072	0.0372328	0.655653	7.16373e-12	2.65399e-11	0.000654817	0.0303293	BOTH
FBgn0040069	vanin-like	X:6094221-6096592	-	Known	YES	0.0361079	0.000179911	0.00140727	0.295371	0.910006	3.66095e-11	3.3821e-10	0.895629	6.92198e-29	1.34826e-27	1.42264e-08	2.47525e-06	BOTH
FBgn0040099	lectin-28C	2L:7857077-7860120	+	Known	YES	0.00328889	0.262261	0.509678	0.738409	0.975441	0	0	0.948387	2.0511e-49	3.32734e-47	0.000121225	0.00743364	BOTH
FBgn0040107	lectin-21Ca	2L:624617-625556	+	Known	YES	0.0502392	9.22952e-06	9.94632e-05	0.463124	0.943323	0.113964	0.202272	0.924091	2.49468e-15	1.21725e-14	1.06366e-32	2.48274e-29	BOTH
FBgn0040364	CG11378	X:1064861-1067830	+	Known	YES	0.00492949	0.169738	0.381641	0.114186	0.848499	0.0168675	0.0421902	0.625079	2.03761e-08	5.8163e-08	3.87666e-05	0.00286106	BOTH
FBgn0040502	CG8343	2R:2067231-2067861	+	Known	YES	0.000351531	0.714185	0.926173	0.285761	0.908483	0.000400163	0.00149936	0.886112	1.13513e-33	3.50993e-32	0.000259736	0.014159	BOTH
FBgn0040532	CG8369	3R:4647730-4648560	+	Known	YES	0.00515699	0.160184	0.366991	0.780627	0.9787	0.71255	0.798109	0.839688	1.10897e-15	5.57721e-15	5.16522e-13	1.71731e-10	BOTH
FBgn0040582	CG5791	3R:17912797-17913551	+	Known	YES	0.0933962	9.5906e-10	2.13704e-08	0.734001	0.97453	0	0	0.751699	2.25936e-14	1.01729e-13	1.70767e-06	0.000188011	BOTH
FBgn0040730	CG15127	2R:15568273-15568896	-	Known	YES	0.0429082	4.30677e-05	0.000395681	0.912057	0.994818	2.72104e-09	2.06442e-08	0.538444	7.26171e-06	1.70059e-05	0.000269684	0.0146064	BOTH
FBgn0040732	CG16926	2R:15387800-15388923	-	Known	YES	0.00137702	0.468423	0.731033	0.219971	0.891504	0.997527	0.998465	0.790294	1.69078e-18	1.0948e-17	6.51034e-06	0.000605587	BOTH
FBgn0040736	IM3	2R:14275400-14276239	+	Known	YES	0.0133169	0.0237262	0.0881432	0.883043	0.991519	0	0	0.608895	1.03122e-09	3.24723e-09	0.000983208	0.0419519	BOTH
FBgn0040958	Peritrophin-15b	2L:8394446-8394940	-	Known	YES	0.0301775	0.00062835	0.004194	0.741127	0.975474	0.000809441	0.00286048	0.783616	4.09195e-15	1.95738e-14	4.98993e-08	7.97914e-06	BOTH
FBgn0040959	Peritrophin-15a	2L:8395665-8396096	-	Known	YES	0.0174308	0.00959538	0.0424243	0.763335	0.977318	4.89553e-05	0.000215206	0.859876	5.03382e-17	2.85148e-16	2.44943e-14	1.05451e-11	BOTH
FBgn0041160	comm2	3L:15690694-15692950	-	Known	YES	4.13868e-06	0.968304	1	0.413584	0.935077	2.22045e-16	3.53964e-15	0.664207	2.94465e-12	1.12685e-11	0.000568261	0.0272993	BOTH
FBgn0041184	Socs36E	2L:18138675-18152417	-	Known	YES	0.0083549	0.0736027	0.208923	0.944922	0.996893	0.0121902	0.0318597	0.565981	0.00207275	0.00385526	9.40195e-08	1.37268e-05	BOTH
FBgn0041195	Pkd2	2L:12398274-12402023	+	Known	YES	0.0301499	0.00063203	0.00421604	0.0269319	0.765253	5.78948e-12	5.84906e-11	0.8102	6.58161e-24	7.66334e-23	0.000650451	0.0302104	BOTH
FBgn0041579	AttC	2R:9281210-9282172	+	Known	YES	7.95276e-07	0.986103	1	0.6873	0.968909	2.18097e-05	0.000101539	0.610746	6.95252e-05	0.000149927	7.1767e-08	1.08556e-05	BOTH
FBgn0041581	AttB	2R:10636728-10637670	+	Known	YES	0.0119812	0.0320012	0.111281	0.470529	0.943323	0.000201117	0.000798947	0.610178	1.71489e-08	4.92695e-08	0.000145284	0.00872741	BOTH
FBgn0043470	lambdaTry	2R:7224345-7225296	+	Known	YES	0.000522777	0.655131	0.885106	0.770729	0.977966	0	0	0.743168	6.13544e-13	2.47451e-12	4.07522e-07	5.30411e-05	BOTH
FBgn0043471	kappaTry	2R:7225302-7226238	-	Known	YES	0.0146276	0.0177397	0.069926	0.748396	0.976718	0	0	0.649148	6.51652e-10	2.08663e-09	6.14281e-05	0.00422979	BOTH
FBgn0043575	PGRP-SC2	2R:4604455-4605200	+	Known	YES	0.000411469	0.691926	0.911508	0.447024	0.940349	0.656471	0.753266	0.885125	1.37617e-30	3.16087e-29	5.60669e-06	0.000530345	BOTH
FBgn0043578	PGRP-SB1	3L:16720399-16721089	-	Known	YES	0.0094009	0.0576611	0.17434	0.216179	0.889732	1.86683e-05	8.75569e-05	0.810358	1.56489e-19	1.12742e-18	1.3639e-06	0.000153177	BOTH
FBgn0043791	phu	3R:5320523-5322445	+	Known	YES	0.00783847	0.0831535	0.228633	0.362346	0.925394	0.000102238	0.000429095	0.697927	9.48694e-14	4.07328e-13	0.000255343	0.0139422	BOTH
FBgn0046302	CG10650	2L:18993360-18995934	-	Known	YES	0.0084021	0.0727903	0.207249	0.729806	0.97388	3.19744e-14	4.14138e-13	0.618932	1.21361e-09	3.79804e-09	0.00044337	0.0222547	BOTH
FBgn0050043	CG30043	2R:8246941-8250670	+	Known	YES	0.0335003	0.000311589	0.00227856	0.429111	0.937679	0.89133	0.928818	0.751246	5.27787e-16	2.72411e-15	2.5904e-05	0.00206127	BOTH
FBgn0050046	CG30046	2R:8201622-8205078	+	Known	YES	0.0586922	1.55785e-06	1.98832e-05	0.584506	0.955603	9.92111e-06	4.82852e-05	0.712653	6.06857e-16	3.11499e-15	0.0011864	0.0487033	BOTH
FBgn0050281	CG30281	2R:18002502-18003694	+	Known	YES	0.164745	1.15915e-16	6.50907e-15	0.000834376	0.549759	2.6678e-11	2.4948e-10	0.792581	2.9065e-19	2.03801e-18	1.50464e-05	0.00127914	BOTH
FBgn0050289	CG30289	2R:17407918-17409353	-	Known	YES	0.00243428	0.334912	0.596067	0.545111	0.950186	0.0550774	0.112658	0.485908	0.00113791	0.00217876	0.000106067	0.00665743	BOTH
FBgn0050362	boly	2R:4253055-4254193	-	Known	YES	0.000694887	0.606576	0.847107	0.433946	0.937679	0.00218813	0.00703235	0.85112	0.0536575	0.0825879	1.71984e-40	5.77521e-37	BOTH
FBgn0050429	CG30429	2R:21133990-21135107	+	Known	YES	0.0702737	1.34647e-07	2.13578e-06	0.707686	0.971477	0.915747	0.945429	0.934787	1.24524e-15	6.2327e-15	7.57707e-37	2.31307e-33	BOTH
FBgn0050463	CG30463	2R:12560740-12620421	-	Known	YES	0.00157982	0.437368	0.702685	0.445281	0.939649	0.0465912	0.0982698	0.647957	1.31134e-11	4.77239e-11	0.000819964	0.036373	BOTH
FBgn0050502	fa2h	2R:3333694-3339058	-	Known	YES	0.00188255	0.396515	0.662102	0.461402	0.943323	6.04625e-06	3.0396e-05	0.678466	1.61994e-08	4.65891e-08	2.22528e-07	3.0253e-05	BOTH
FBgn0051004	mesh	3R:27004111-27021484	-	Known	YES	0.0156862	0.0140509	0.0580978	0.0709856	0.81912	0.904972	0.938141	0.675371	2.93143e-05	6.52291e-05	6.99871e-11	1.71545e-08	BOTH
FBgn0051041	CG31041	3R:25415792-25416628	-	Known	YES	0.0696098	1.55004e-07	2.43567e-06	0.153603	0.865597	0.022638	0.0541931	0.80038	2.33055e-17	1.35844e-16	1.8087e-07	2.48919e-05	BOTH
FBgn0051087	CG31087	3R:21136749-21139555	-	Known	YES	0.00338126	0.255654	0.501533	0.485011	0.943909	4.44089e-16	6.85785e-15	0.659039	1.65927e-06	4.09e-06	2.0922e-08	3.49533e-06	BOTH
FBgn0051091	CG31091	3R:21725625-21727894	+	Known	YES	0.0526712	5.53472e-06	6.2641e-05	0.784025	0.979332	0	0	0.719709	1.57634e-15	7.82693e-15	0.000377807	0.0194284	BOTH
FBgn0051092	LpR2	3R:21524449-21566187	-	Known	YES	0.0141428	0.0197483	0.0761365	0.377043	0.928536	0.117729	0.20741	0.808176	1.71037e-21	1.52954e-20	3.89295e-05	0.00286678	BOTH
FBgn0051106	CG31106	3R:21042019-21044430	+	Known	YES	0.000756189	0.591122	0.835075	0.811863	0.982269	0	0	0.74394	1.44897e-14	6.63798e-14	6.53491e-06	0.000606195	BOTH
FBgn0051148	Gba1a	3R:19526343-19528327	+	Known	YES	0.00633275	0.119518	0.298417	0.676848	0.967632	0	0	0.726362	1.02597e-07	2.77682e-07	3.27883e-11	8.46948e-09	BOTH
FBgn0051198	CG31198	3R:17580046-17583480	+	Known	YES	0.00480919	0.175052	0.389875	0.822223	0.982533	0.854554	0.903167	0.754866	5.02689e-10	1.62326e-09	1.01489e-10	2.40001e-08	BOTH
FBgn0051233	CG31233	3R:17575689-17578959	+	Known	YES	0.00542482	0.14971	0.350209	0.882224	0.991299	2.27083e-09	1.73817e-08	0.555152	9.161e-07	2.30415e-06	0.00041766	0.0211926	BOTH
FBgn0051267	CG31267	3R:12959919-12961005	+	Known	YES	0.0605052	1.06288e-06	1.40022e-05	0.186779	0.880184	0.000647803	0.00233348	0.722959	1.29602e-14	5.96004e-14	7.74355e-05	0.00512876	BOTH
FBgn0051300	CG31300	3R:21109342-21110946	+	Known	YES	0.00389696	0.222279	0.456299	0.170987	0.870726	0	0	0.869881	7.78481e-32	2.0307e-30	0.000746269	0.0338188	BOTH
FBgn0051323	CG31323	3R:21996569-22013029	+	Known	YES	0.0216052	0.00389365	0.0199952	0.14651	0.860045	1.06305e-06	5.88727e-06	0.459814	0.00046339	0.000926834	0.00106782	0.044766	BOTH
FBgn0051343	CG31343	3R:17570988-17574725	+	Known	YES	0.00762326	0.0875194	0.237833	0.964354	0.998005	7.03e-05	0.000301998	0.732073	1.43568e-12	5.6307e-12	9.13731e-07	0.000108421	BOTH
FBgn0051410	Npc2e	3R:5879054-5880070	+	Known	YES	0.00225996	0.352859	0.615798	0.738474	0.975441	0.0446988	0.0948684	0.702428	8.67152e-05	0.000185518	1.88109e-13	6.80941e-11	BOTH
FBgn0051416	tRNA:Asp-GTC-3-1	3R:20740782-20740853	-	Known	RARE	0.000166388	0.801074	0.983845	0.743454	0.975773	0.514316	0.634713	0.334424	0.999998	1	3.49947e-05	0.00262304	BASELINE
FBgn0051446	CG31446	3R:11518808-11519916	+	Known	YES	0.00304704	0.280592	0.532422	0.208583	0.88685	0.000855899	0.00300504	0.763774	9.78153e-16	4.93633e-15	3.35001e-06	0.000344016	BOTH
FBgn0051522	CG31522	3R:267137-288605	-	Known	YES	0.00266876	0.312639	0.570567	0.414754	0.935077	4.42653e-06	2.26605e-05	0.866199	1.37368e-31	3.50251e-30	0.00107242	0.0449027	BOTH
FBgn0051526	lncRNA:CR31526	3R:358970-359662	+	Known	YES	0.00864748	0.0687186	0.198655	0.853077	0.986685	0.517585	0.637571	0.808653	3.3056e-19	2.29913e-18	1.06727e-06	0.000124875	BOTH
FBgn0051619	nolo	2L:21684106-21729051	+	Known	YES	0.000112836	0.835632	1	0.143943	0.859346	0.0042888	0.0127668	0.849349	4.86296e-07	1.2497e-06	3.70434e-27	5.18299e-24	BOTH
FBgn0051720	mthl15	2L:10234585-10238317	-	Known	YES	0.0100448	0.0497018	0.15582	0.535081	0.949726	0	0	0.605895	8.90339e-05	0.000190285	8.92051e-08	1.30808e-05	BOTH
FBgn0051792	CG31792	2L:18997448-19002713	+	Known	YES	0.000519165	0.656248	0.885867	0.99911	0.99991	0.409683	0.53846	0.901384	6.63082e-38	3.16283e-36	0.00104971	0.0442608	BOTH
FBgn0051810	CG31810	2L:16849018-16852368	-	Known	YES	0.082827	9.28969e-09	1.77748e-07	0.662759	0.965599	0.0189875	0.0466904	0.930161	3.7589e-31	9.17325e-30	8.42085e-14	3.32673e-11	BOTH
FBgn0051901	Mur29B	2L:8352187-8355172	+	Known	YES	0.000789782	0.582993	0.828928	0.352459	0.92267	0.00250508	0.0079355	0.838942	2.67387e-07	7.00924e-07	9.17915e-25	1.10084e-21	BOTH
FBgn0051942	tRNA:Arg-TCT-2-1	2L:1965426-1965498	+	Known	RARE	0	1	1	0.467194	0.943323	0.213228	0.330509	0.297886	0.999999	1	0.000151108	0.0089968	ETOH
FBgn0052054	CG32054	3L:10085868-10087838	-	Known	YES	0.0234749	0.00260904	0.014218	0.074477	0.81912	0	0	0.651167	5.04856e-11	1.75534e-10	0.000285377	0.0152838	BOTH
FBgn0052073	CG32073	3L:11100108-11100682	-	Known	YES	0.065378	3.79747e-07	5.51554e-06	0.0692234	0.818937	0.345983	0.474347	0.956457	3.0015e-38	1.46711e-36	2.62614e-16	1.46976e-13	BOTH
FBgn0052107	CG32107	3L:12850382-12854405	-	Known	YES	0.0841422	7.01026e-09	1.36784e-07	0.294167	0.910006	8.4893e-11	7.56377e-10	0.684389	3.94646e-10	1.28413e-09	2.90195e-06	0.000305478	BOTH
FBgn0052284	CG32284	3L:3186664-3187245	+	Known	YES	0.0256952	0.00162529	0.0095215	0.494861	0.945182	0.000529795	0.00194428	0.665184	2.72859e-10	8.98206e-10	2.69947e-05	0.00211301	BOTH
FBgn0052475	mthl8	3L:22428-26308	+	Known	YES	0.533607	3.00399e-65	6.30462e-62	0.0503165	0.789664	0.706965	0.793601	0.811563	2.08579e-20	1.65152e-19	4.55456e-06	0.000444599	BOTH
FBgn0052594	be	X:14918469-14936093	+	Known	YES	2.618e-05	0.920393	1	0.06778	0.817718	5.69348e-09	4.16249e-08	0.816202	1.22019e-24	1.53807e-23	0.00070508	0.0323451	BOTH
FBgn0052676	stx	X:10605196-10638976	-	Known	YES	0.00169612	0.420965	0.686814	0.592009	0.95702	1.04653e-06	5.80156e-06	0.520333	0.000864148	0.00167725	1.3082e-05	0.00113252	BOTH
FBgn0052720	CG32720	X:7429658-7430992	-	Known	YES	0.00537579	0.151568	0.353153	0.632119	0.962565	2.19192e-05	0.000101992	0.813127	1.29628e-09	4.05036e-09	3.81076e-17	2.32664e-14	BOTH
FBgn0052750	CG32750	X:6088770-6090472	-	Known	YES	0.0133659	0.0234687	0.0874477	0.194798	0.883554	4.23825e-06	2.1763e-05	0.809095	1.6954e-21	1.51737e-20	3.41266e-05	0.00256944	BOTH
FBgn0053017	CG33017	2R:12159619-12165160	+	Known	YES	0.00415412	0.207598	0.435777	0.332563	0.918584	0.0446301	0.0947425	0.764872	1.34298e-11	4.88278e-11	7.57558e-10	1.65187e-07	BOTH
FBgn0053054	CG33054	3L:21190511-21195982	-	Known	YES	0.0442652	3.23851e-05	0.000307201	0.626558	0.961704	0.108343	0.194133	0.758192	2.17649e-19	1.54289e-18	0.00109941	0.0459753	BOTH
FBgn0053137	CG33137	2R:9062900-9063580	+	Known	YES	1.73682e-05	0.935124	1	0.954249	0.997891	0.00122432	0.00416737	0.656989	5.99159e-08	1.6497e-07	7.44468e-07	9.15723e-05	BOTH
FBgn0053143	CG33143	2R:18501833-18521589	+	Known	YES	8.29717e-06	0.955133	1	0.320611	0.915612	0.00668144	0.0188654	0.67904	0.000259837	0.000532682	1.61755e-12	4.93793e-10	BOTH
FBgn0053192	MtnD	3R:16360684-16361023	+	Known	YES	0.098696	3.04869e-10	7.35453e-09	0.421309	0.935254	0	0	0.868458	1.04849e-27	1.83664e-26	4.73602e-06	0.00045964	BOTH
FBgn0053258	CG33258	3L:16075651-16076738	+	Known	YES	0.00552616	0.14595	0.344364	0.126077	0.85495	0	0	0.814217	2.28969e-18	1.46509e-17	8.68356e-08	1.27892e-05	BOTH
FBgn0053265	Muc68E	3L:11960443-11966079	-	Known	YES	0.0434871	3.81365e-05	0.000355334	0.462506	0.943323	0	0	0.783399	1.5128e-08	4.36087e-08	3.52331e-15	1.69018e-12	BOTH
FBgn0053282	CG33282	2L:3327903-3329792	+	Known	YES	0.0312152	0.000504634	0.00346749	0.381631	0.928629	0.00111685	0.00383186	0.924102	2.6949e-36	1.08637e-34	7.23376e-08	1.08928e-05	BOTH
FBgn0053346	CG33346	3R:24494955-24496174	+	Known	YES	0.219117	2.63189e-22	2.63032e-20	0.438012	0.938247	0	0	0.943177	3.52753e-37	1.55452e-35	5.28996e-12	1.51826e-09	BOTH
FBgn0053532	lectin-37Da	2L:19418317-19419029	+	Known	YES	0.00895654	0.0639322	0.188237	0.897345	0.993001	5.75984e-13	6.50637e-12	0.877279	1.5137e-22	1.52186e-21	2.89949e-11	7.54766e-09	BOTH
FBgn0053533	lectin-37Db	2L:19419075-19419767	+	Known	YES	0.010024	0.04994	0.156362	0.732804	0.974359	0	0	0.676168	1.9338e-09	5.96355e-09	1.90971e-06	0.000208887	BOTH
FBgn0053926	CG33926	3L:9436332-9439488	+	Known	YES	0.109199	3.0964e-11	8.65754e-10	0.127664	0.855594	9.44654e-07	5.26547e-06	0.889288	6.74866e-25	8.76674e-24	5.71791e-11	1.42228e-08	BOTH
FBgn0053965	CG33965	3L:1232882-1234015	+	Known	YES	0.142223	2.00496e-14	8.4581e-13	0.416609	0.935077	0.000101108	0.000424619	0.804665	2.39523e-20	1.88586e-19	1.2553e-05	0.00109205	BOTH
FBgn0053978	CG33978	4:178201-196265	-	Known	YES	0.0956755	5.86218e-10	1.34646e-08	0.506086	0.946647	0.00316265	0.00975081	0.831742	0.00376269	0.00681101	1.10903e-32	2.48274e-29	BOTH
FBgn0058198	CG40198	3RHet:2504376-2506001	-	Known	YES	0	1	1	0.210578	0.888529	0	0	0.883372	3.75215e-31	9.17009e-30	1.94002e-05	0.00160458	BOTH
FBgn0062412	Ctr1B	3R:4143334-4144927	+	Known	YES	0.00677442	0.107321	0.276155	0.913226	0.994823	1.03229e-12	1.13738e-11	0.602513	1.65848e-07	4.41964e-07	4.9399e-05	0.00349962	BOTH
FBgn0062928	hpRNA:CR33940	3L:19479846-19481539	-	Known	YES	0.00446144	0.191525	0.413861	0.843219	0.9856	0.403056	0.53156	0.948477	5.84024e-50	1.01614e-47	0.000220613	0.0123676	BOTH
FBgn0063497	GstE3	2R:14288218-14288972	+	Known	YES	0.00139083	0.466198	0.728764	0.510273	0.946647	0.00315413	0.00972631	0.887302	6.79777e-33	1.95603e-31	7.66411e-05	0.00508618	BOTH
FBgn0063923	Kaz1-ORFB	3L:216625-218058	+	Known	YES	0.00115851	0.506049	0.763976	0.724377	0.973383	0	0	0.88747	1.04416e-30	2.42818e-29	3.59192e-06	0.000362212	BOTH
FBgn0067783	DPCoAC	3R:16378107-16383389	-	Known	YES	0.013023	0.025334	0.0927616	0.13289	0.855742	1.25899e-13	1.52643e-12	0.546245	3.37335e-06	8.11556e-06	0.000289422	0.0154267	BOTH
FBgn0084001	CG41434	2L:22037860-22039772	+	Known	YES	0.000482045	0.668005	0.895259	0.108856	0.84556	0.23109	0.35135	0.696361	1.78656e-10	5.95933e-10	1.4478e-06	0.000161519	BOTH
FBgn0085195	CG34166	2L:14743193-14743879	+	Known	YES	0.00973046	0.053432	0.164602	0.765056	0.977599	8.63619e-09	6.19517e-08	0.892209	5.41529e-33	1.57578e-31	2.62257e-05	0.00208194	BOTH
FBgn0085223	CG34194	2R:13431695-13432550	+	Known	YES	0.00572622	0.138834	0.331957	0.47247	0.943323	4.24278e-11	3.90243e-10	0.451592	0.00111284	0.00213307	0.000806091	0.0359476	BOTH
FBgn0085227	CG34198	2R:15569951-15570482	-	Known	YES	0.0468729	1.87249e-05	0.000188033	0.792369	0.980629	0	0	0.569277	5.4286e-08	1.49924e-07	0.0011162	0.0465038	BOTH
FBgn0085261	CG34232	2R:8052414-8053317	-	Known	YES	0.64014	8.48076e-87	9.49279e-83	0.233359	0.894606	5.72935e-08	3.72836e-07	0.627121	1.41665e-09	4.41395e-09	0.000218056	0.0123271	BOTH
FBgn0085313	CG34284	3R:14728060-14728655	-	Known	YES	8.09455e-05	0.860504	1	0.525808	0.947915	0.0360422	0.0795378	0.967404	7.36879e-15	3.45592e-14	5.29498e-62	3.55611e-58	BOTH
FBgn0085320	CG34291	3R:22251012-22251503	-	Known	YES	0.280808	3.47521e-29	6.30798e-27	0.964762	0.998005	0.00150964	0.00502344	0.8364	1.85913e-22	1.85141e-21	1.30039e-06	0.000147542	BOTH
FBgn0085384	CG34355	3R:19629581-19676827	+	Known	YES	0.00292301	0.290617	0.544673	0.558783	0.951658	0.822106	0.880178	0.720759	1.55902e-14	7.11787e-14	8.64524e-05	0.00560584	BOTH
FBgn0085413	CG34384	3R:3640083-3681114	+	Known	YES	0.027364	0.00114014	0.0070327	0.687795	0.968964	1.83944e-07	1.12978e-06	0.738646	4.83839e-16	2.50537e-15	0.000114273	0.00710609	BOTH
FBgn0085415	CG34386	2R:13949920-13981133	+	Known	YES	0.0031832	0.270082	0.518842	0.657004	0.965523	3.9968e-15	5.676e-14	0.648346	1.70284e-11	6.13732e-11	0.000684732	0.0315842	BOTH
FBgn0085419	Rgk2	2R:14427090-14436474	+	Known	YES	0.00738778	0.0925815	0.247775	0.939049	0.995786	0	0	0.734845	8.24537e-15	3.85465e-14	2.8577e-05	0.0022162	BOTH
FBgn0085424	nub	2L:12587625-12628135	+	Known	YES	0.00543083	0.149484	0.349868	0.260137	0.90001	0.0625554	0.124992	0.718772	5.90506e-06	1.39279e-05	5.88921e-13	1.88343e-10	BOTH
FBgn0250757	CG42235	3R:21732744-21746768	+	Known	YES	0.0148015	0.0170716	0.067858	0.758413	0.977318	0.29926	0.426018	0.843988	3.08259e-25	4.13393e-24	2.04935e-05	0.0016867	BOTH
FBgn0250831	BG642167	3R:21632167-21632683	+	Known	YES	0.0933913	9.60071e-10	2.13788e-08	0.525826	0.947915	0.608578	0.714572	0.71764	3.15328e-08	8.87794e-08	5.41084e-10	1.20328e-07	BOTH
FBgn0250836	CG8628	3L:7123974-7124605	+	Known	YES	0.126152	7.36101e-13	2.57482e-11	0.803412	0.981871	1.395e-09	1.09092e-08	0.796368	2.09118e-21	1.84843e-20	0.000177391	0.0103059	BOTH
FBgn0259213	side-II	2L:14907489-14972300	-	Known	YES	0.016395	0.0120293	0.051048	0.965717	0.998005	3.10197e-07	1.85038e-06	0.571602	5.77992e-08	1.59286e-07	0.000928854	0.0399884	BOTH
FBgn0259227	CG42327	3R:7481871-7499696	+	Known	YES	6.24069e-05	0.877372	1	0.175834	0.874664	0.0631644	0.12598	0.730344	1.63793e-15	8.11955e-15	0.000130128	0.00790183	BOTH
FBgn0259237	CG42335	3R:17584486-17595023	+	Known	YES	0.00814267	0.0773772	0.216471	0.787337	0.980113	0	0	0.934018	3.96747e-38	1.91144e-36	1.2268e-08	2.16821e-06	BOTH
FBgn0259682	Jabba	2R:14644579-14648587	-	Known	YES	0.0107506	0.0422895	0.137792	0.386438	0.929861	9.06702e-07	5.07246e-06	0.67784	1.06575e-09	3.35124e-09	2.61802e-06	0.000277328	BOTH
FBgn0259748	CG42397	3L:11966185-11966890	-	Known	YES	0.0101177	0.0488774	0.153739	0.826866	0.983351	2.57572e-14	3.36467e-13	0.914457	1.25159e-18	8.19748e-18	3.64114e-24	4.21619e-21	BOTH
FBgn0259938	cwo	3R:6213980-6226474	+	Known	YES	0.0282643	0.000942015	0.00595058	0.131443	0.855742	0.664684	0.759548	0.572178	1.44073e-07	3.85589e-07	0.000493098	0.0244944	BOTH
FBgn0260000	CG17570	2L:20263419-20264424	-	Known	YES	0.00665914	0.110367	0.281876	0.439924	0.938247	0.0016947	0.00557353	0.592879	0.00010459	0.000221894	2.74664e-07	3.66e-05	BOTH
FBgn0260396	CG42521	3L:10616166-10616676	-	Known	YES	0.00457425	0.185992	0.405665	0.558612	0.951658	0.00081262	0.0028705	0.867082	7.70738e-20	5.7247e-19	2.14552e-12	6.37579e-10	BOTH
FBgn0260474	CG30002	2R:5591889-5593652	+	Known	YES	0.0547487	3.5748e-06	4.22236e-05	0.93449	0.99566	0	0	0.763213	8.73129e-17	4.83061e-16	1.92576e-05	0.00159671	BOTH
FBgn0260658	CG42541	X:3785530-3824611	-	Known	YES	0.00691535	0.103721	0.269182	0.81481	0.982269	8.1446e-13	9.07201e-12	0.763606	2.14436e-17	1.25405e-16	4.53474e-05	0.00327477	BOTH
FBgn0260945	Atg1	3L:12777529-12798216	-	Known	YES	0.00146695	0.454239	0.718014	0.683521	0.968295	0.00440705	0.0130701	0.49027	0.000688975	0.00135321	0.000129531	0.0078798	BOTH
FBgn0261399	Pp1-Y1	U:8549518-8550146	+	Known	YES	0	1	1	0.158695	0.865729	0.014245	0.0364036	0.945398	9.05158e-47	1.08943e-44	1.87188e-05	0.00155975	BOTH
FBgn0261675	Npc1b	X:20805896-20810530	+	Known	YES	0.00182424	0.403934	0.668743	0.175981	0.875092	1.84312e-08	1.27503e-07	0.64035	3.3263e-06	8.00524e-06	8.66047e-08	1.27892e-05	BOTH
FBgn0261703	gce	X:15191799-15213107	+	Known	YES	0.00475727	0.177405	0.39314	0.382513	0.928629	1.0424e-09	8.27906e-09	0.604432	3.29008e-08	9.25222e-08	0.000141615	0.00853758	BOTH
FBgn0261801	CG42747	3L:6393690-6479064	+	Known	YES	0.00505145	0.164538	0.373618	0.555483	0.951188	0.701548	0.789224	0.417746	0.0178492	0.0295609	0.000361159	0.0187446	BOTH
FBgn0261802	CG42748	2L:22131221-22166221	+	Known	YES	0.00373635	0.232077	0.470771	0.0740051	0.81912	5.68608e-05	0.00024772	0.782196	1.71688e-10	5.73661e-10	1.44395e-12	4.44843e-10	BOTH
FBgn0261853	CG42782	2R:8306619-8306900	-	Known	YES	0.0589359	1.47984e-06	1.89741e-05	0.0808895	0.827899	0.00654997	0.0185419	0.946651	3.50912e-50	6.23473e-48	0.000630816	0.0295025	BOTH
FBgn0261989	CG42807	2R:9458100-9460264	-	Known	YES	0.00848083	0.0714566	0.20444	0.598056	0.957962	1.33227e-15	1.98345e-14	0.792384	1.84701e-20	1.46729e-19	8.54244e-05	0.00555921	BOTH
FBgn0262003	CG42821	3R:13238799-13239361	+	Known	YES	0.0328875	0.000354566	0.00255665	0.0755304	0.821254	0.130874	0.225284	0.846473	8.02323e-23	8.24419e-22	2.85621e-07	3.77604e-05	BOTH
FBgn0262007	CG42825	3L:10088854-10091215	-	Known	YES	0.0151128	0.0159394	0.0642166	0.544166	0.949804	2.14504e-07	1.30247e-06	0.908243	2.36851e-25	3.20833e-24	3.48731e-14	1.4638e-11	BOTH
FBgn0262509	nrm	3L:22991472-23033400	+	Known	YES	0.0362107	0.00017606	0.00138181	0.306596	0.912019	0.495477	0.617773	0.694159	7.90532e-11	2.70878e-10	3.59135e-06	0.000362212	BOTH
FBgn0262532	CR43086	3L:17861840-17863673	+	Known	YES	0.0153014	0.0152911	0.0621641	0.762992	0.977318	0.00458154	0.0135254	0.934049	4.47346e-46	5.04089e-44	0.000863969	0.0378748	BOTH
FBgn0262580	CG43120	3L:14375013-14376399	+	Known	YES	0.0173616	0.00974109	0.0429498	0.066874	0.817718	0	0	0.926506	7.41183e-37	3.16653e-35	6.13857e-08	9.49923e-06	BOTH
FBgn0262679	CG43149	3L:53873-54751	-	Known	YES	0.00710854	0.098999	0.260409	0.794579	0.980849	0.591394	0.701078	0.942395	3.26544e-13	1.34429e-12	2.1998e-45	1.05527e-41	BOTH
FBgn0262734	eIF4H1	X:16342698-16349005	+	Known	YES	0.0766399	3.48002e-08	6.08958e-07	0.540904	0.949726	0	0	0.491777	6.03471e-05	0.000130731	0.000902659	0.0391619	BOTH
FBgn0262825	lncRNA:CR43196	3R:13207851-13208489	-	Known	YES	0.00380785	0.227652	0.464095	0.117729	0.851603	1.68281e-11	1.60955e-10	0.84686	1.84248e-23	2.0312e-22	7.65409e-07	9.34633e-05	BOTH
FBgn0262962	CG43273	3R:20656023-20656695	+	Known	YES	0.0165887	0.0115303	0.0492419	0.101025	0.840948	0.000238559	0.000934638	0.792281	6.11309e-20	4.58823e-19	4.21365e-05	0.00306265	BOTH
FBgn0262967	lncRNA:CR43278	X:7382986-7387309	-	Known	YES	0.000842675	0.570638	0.819205	0.163327	0.868766	2.26001e-07	1.36856e-06	0.786415	0.00670058	0.0117613	4.47344e-26	5.77761e-23	BOTH
FBgn0262969	lncRNA:CR43280	3L:18433830-18434971	+	Known	YES	0.0233924	0.00265543	0.0144345	0.0385943	0.771133	0.00022527	0.000886402	0.876808	1.86441e-07	4.94447e-07	2.39379e-32	5.02397e-29	BOTH
FBgn0263089	lncRNA:CR43357	2L:15202259-15203967	+	Known	YES	0.192967	1.51189e-19	1.18898e-17	0.69684	0.970217	1.50653e-05	7.1538e-05	0.689004	3.22088e-12	1.22892e-11	6.27968e-05	0.0043035	BOTH
FBgn0263321	CG43402	2L:1442627-1443832	+	Known	YES	0.0304779	0.000589697	0.00396675	0.872802	0.989829	2.04483e-07	1.24725e-06	0.861903	1.04675e-29	2.22468e-28	0.000265556	0.0144061	BOTH
FBgn0263328	lncRNA:CR43409	2L:11290632-11291077	-	Known	YES	0.0756108	4.33248e-08	7.45693e-07	0.292869	0.910006	3.45399e-05	0.000155418	0.833583	2.58553e-26	3.91267e-25	0.000456286	0.0228347	BOTH
FBgn0263330	lncRNA:CR43411	2L:14613258-14613621	+	Known	YES	0.0582838	1.69787e-06	2.14583e-05	0.747167	0.97652	0.0534319	0.109888	0.888422	5.95702e-34	1.90289e-32	0.000218949	0.0123568	BOTH
FBgn0263337	lncRNA:CR43418	2R:14702443-14703146	+	Known	YES	0.00468069	0.180941	0.398348	0.25379	0.897297	0.600841	0.708764	0.86688	1.21206e-28	2.31651e-27	2.56716e-05	0.00204763	BOTH
FBgn0263492	asRNA:CR43481	3L:9371260-9374219	+	Known	YES	0.00047024	0.671856	0.897852	0.587375	0.95643	0.955716	0.971928	0.737318	2.11776e-15	1.0409e-14	5.25876e-05	0.00368662	BOTH
FBgn0263506	lncRNA:CR43495	X:4768033-4768415	-	Known	YES	0.172724	1.81115e-17	1.13892e-15	0.125804	0.85495	0.372898	0.501821	0.863429	1.86401e-27	3.17894e-26	1.00887e-05	0.000901003	BOTH
FBgn0263624	lncRNA:CR43633	3R:21619788-21620143	-	Known	YES	0.00436928	0.196187	0.42015	0.729601	0.97388	0.000165024	0.000666128	0.802989	4.73247e-21	4.01304e-20	4.46774e-05	0.00323334	BOTH
FBgn0263748	CG43673	X:15673179-15674247	+	Known	YES	0.0125904	0.0279081	0.10008	0.181241	0.877545	0	0	0.795703	4.30742e-20	3.28959e-19	3.24654e-05	0.00245538	BOTH
FBgn0263842	CG43703	2L:3765494-3765863	+	Known	YES	0.00444091	0.192552	0.415311	0.399226	0.931648	0.723708	0.806865	0.487663	0.0209473	0.0343195	3.21173e-06	0.000330828	ETOH
FBgn0263843	lncRNA:CR43704	2L:3769926-3770454	-	Known	YES	0.0252945	0.00176994	0.0102421	0.67666	0.967607	0.00198628	0.00644284	0.555604	0.0241854	0.0392342	6.22734e-09	1.16175e-06	BOTH
FBgn0264081	CG43750	2L:2389578-2390689	-	Known	YES	0.146702	7.26585e-15	3.24451e-13	0.523938	0.947915	2.01508e-11	1.91186e-10	0.770127	2.10547e-18	1.34978e-17	8.53945e-05	0.00555921	BOTH
FBgn0264272	mwh	3L:1200786-1232700	+	Known	YES	0.0678565	2.24744e-07	3.40718e-06	0.469311	0.943323	0.000591141	0.00214828	0.705504	1.93011e-14	8.73963e-14	0.000329962	0.0172319	BOTH
FBgn0264295	CG43773	2L:4007690-4007984	+	Known	YES	0.00425278	0.202272	0.42867	0.411671	0.93466	7.56416e-06	3.75102e-05	0.572433	0.000213311	0.000440799	8.38593e-07	0.000100932	BOTH
FBgn0264296	CG43774	2L:4008653-4009090	+	Known	YES	0.152286	2.03632e-15	9.59043e-14	0.238187	0.894606	9.97642e-07	5.54124e-06	0.911714	5.03445e-33	1.47134e-31	5.27034e-08	8.38759e-06	BOTH
FBgn0264367	lncRNA:CR43819	2L:17085650-17086419	+	Known	YES	0.102616	1.30165e-10	3.34939e-09	0.906595	0.99439	0.00102496	0.00354304	0.807454	4.38179e-24	5.1938e-23	0.00111421	0.0464784	BOTH
FBgn0264474	lncRNA:CR43882	3L:4745911-4746632	-	Known	YES	0.0256445	0.00164291	0.0096113	0.0584833	0.803469	0.986974	0.992056	0.799003	6.90956e-20	5.1641e-19	1.48878e-05	0.00126886	BOTH
FBgn0264502	CG43901	X:10799800-10817469	+	Known	YES	5.63037e-05	0.883478	1	0.871942	0.989829	1.14427e-09	9.0551e-09	0.592439	0.297577	0.396014	2.23602e-13	7.90374e-11	BOTH
FBgn0264515	lncRNA:CR43914	3L:13209203-13210627	+	Known	YES	0.00475824	0.17736	0.39314	0.964577	0.998005	0.00844751	0.0231718	0.853918	1.89926e-17	1.11616e-16	5.31015e-13	1.74818e-10	BOTH
FBgn0264518	lncRNA:CR43917	3L:3884481-3884801	-	Known	YES	0.00258362	0.320495	0.580279	0.244661	0.894987	0.00479903	0.0140895	0.69431	2.17893e-12	8.42956e-12	4.88666e-05	0.00348395	BOTH
FBgn0264727	lncRNA:CR43995	3L:22065469-22065720	+	Known	YES	0.0695064	1.58439e-07	2.48533e-06	0.551041	0.950959	3.66443e-08	2.4448e-07	0.383155	0.0412865	0.0647609	0.000877671	0.0383492	BOTH
FBgn0264750	CG44008	2L:11841502-11842445	-	Known	YES	0.050025	9.65476e-06	0.000103779	0.720311	0.97329	0	0	0.671236	1.2635e-12	4.97169e-12	0.000533233	0.0260647	BOTH
FBgn0264753	Rgk1	2R:15198653-15244030	-	Known	YES	0.00263691	0.315548	0.574532	0.471046	0.943323	1.74796e-09	1.35401e-08	0.690192	1.91031e-14	8.65113e-14	0.00121059	0.0495149	BOTH
FBgn0264775	CG44013	3R:11334618-11335639	-	Known	YES	0.0100027	0.0501852	0.156921	0.259499	0.899656	0.488642	0.611933	0.895815	1.13652e-27	1.98153e-26	1.35773e-09	2.84954e-07	BOTH
FBgn0264776	CG44014	3R:11333662-11334608	-	Known	YES	0.170141	3.3087e-17	2.01644e-15	0.941164	0.996077	2.1863e-11	2.06639e-10	0.794981	3.21497e-12	1.2268e-11	7.92666e-12	2.25574e-09	BOTH
FBgn0264907	CG44098	3R:576131-598919	-	Known	YES	6.18323e-06	0.961263	1	0.156404	0.865597	0.381626	0.51064	0.588922	0.0131629	0.0222328	4.75874e-10	1.06532e-07	BOTH
FBgn0264953	Piezo	2L:8163073-8190137	+	Known	YES	0.0147693	0.0171933	0.0682124	0.182237	0.877627	0	0	0.748417	2.05788e-18	1.3218e-17	0.000904426	0.0391879	BOTH
FBgn0265070	asRNA:CR44181	2L:10695058-10698195	+	Known	YES	0.000166626	0.800935	0.983774	0.211835	0.888851	0.00963108	0.0259999	0.748527	4.93498e-17	2.79785e-16	0.000154873	0.00918838	BOTH
FBgn0265185	CG44250	2R:8837909-8839798	-	Known	YES	0.00101075	0.534517	0.787897	0.119147	0.851663	3.82979e-07	2.25094e-06	0.723483	1.73546e-07	4.61416e-07	2.8056e-11	7.36031e-09	BOTH
FBgn0265186	CG44251	2R:8835853-8839798	-	Known	YES	0.0135393	0.0225799	0.0847419	0.135681	0.856572	6.17561e-07	3.52298e-06	0.637074	0.00165667	0.00311274	3.8111e-11	9.6952e-09	BOTH
FBgn0265314	asRNA:CR44287	3R:23144050-23144968	+	Known	YES	0.0583602	1.67078e-06	2.11397e-05	0.808523	0.982258	0.0103223	0.0275907	0.898434	2.89385e-23	3.1146e-22	2.77743e-14	1.18058e-11	BOTH
FBgn0265416	Neto	X:13339936-13421315	+	Known	YES	1.04572e-06	0.984065	1	0.760535	0.977318	0.737509	0.817825	0.829883	4.64607e-26	6.85781e-25	0.000575396	0.0275239	BOTH
FBgn0265449	lncRNA:CR44349	3R:13343932-13344806	-	Known	YES	0.312503	6.01878e-33	1.61689e-30	0.468722	0.943323	0.598038	0.70642	0.859717	5.94581e-29	1.16556e-27	0.000157121	0.00928894	BOTH
FBgn0265510	asRNA:CR44372	2R:11578559-11581392	-	Known	YES	0.114019	1.07606e-11	3.20925e-10	0.0425034	0.777096	0.195995	0.309281	0.873983	3.03538e-19	2.12262e-18	4.10993e-14	1.68307e-11	BOTH
FBgn0265541	CR44391	2R:13023100-13023830	+	Known	YES	0.0442466	3.25116e-05	0.000308053	0.869882	0.989718	0.00126625	0.00429096	0.830824	1.11571e-19	8.14644e-19	3.23955e-08	5.30654e-06	BOTH
FBgn0265586	lncRNA:CR44413	2L:17625098-17625690	-	Known	YES	0.215083	7.10525e-22	6.81698e-20	0.730161	0.97388	0.00780839	0.0216236	0.869126	1.36378e-13	5.77864e-13	2.77501e-20	2.2728e-17	BOTH
FBgn0265592	lncRNA:CR44419	2R:13892900-13893500	+	Known	YES	0.0137167	0.0217066	0.082112	0.823872	0.982894	0.030617	0.0696014	0.622362	1.83816e-08	5.26801e-08	5.25585e-05	0.00368662	BOTH
FBgn0265613	asRNA:CR44431	X:20914577-20915051	-	Known	YES	0.0401281	7.72438e-05	0.000662033	0.374232	0.928287	0.280215	0.406086	0.610024	1.39032e-06	3.44757e-06	4.36325e-06	0.000428415	BASELINE
FBgn0265702	asRNA:CR44509	2R:15599600-15600354	-	Known	YES	0.00391064	0.221468	0.455468	0.266781	0.902503	0.00386705	0.0116539	0.876956	7.60074e-16	3.86716e-15	9.66608e-19	6.62422e-16	BOTH
FBgn0265811	asRNA:CR44600	2L:13398858-13399831	-	Known	YES	0.0600977	1.15829e-06	1.51543e-05	0.367956	0.926629	0.200214	0.314563	0.690648	6.87431e-13	2.76256e-12	0.00014661	0.00876009	BOTH
FBgn0265864	asRNA:CR44653	2R:16449750-16450200	+	Known	YES	0.0055894	0.143657	0.340445	0.0265223	0.765253	0.565871	0.679791	0.335868	0.586137	0.720838	0.000199604	0.0113798	BASELINE
FBgn0265914	asRNA:CR44703	2R:16955765-16956950	+	Known	YES	0.0174016	0.00965657	0.0426275	0.193513	0.881995	0.502356	0.623663	0.83789	5.2512e-22	4.99675e-21	4.54586e-07	5.82633e-05	BOTH
FBgn0265922	lncRNA:CR44711	X:21454829-21455602	+	Known	YES	0.00454226	0.187542	0.407641	0.656317	0.965503	0.0285314	0.0656694	0.723706	2.78105e-15	1.35207e-14	0.00018494	0.0106706	BOTH
FBgn0265938	lncRNA:CR44725	2R:17419100-17419700	-	Known	YES	0.0201752	0.00529572	0.0258801	0.48283	0.943323	0.00546114	0.0157802	0.568575	0.0219298	0.0357964	1.88296e-09	3.92732e-07	BOTH
FBgn0265974	ttv	2R:10413772-10475422	+	Known	YES	0.0424187	4.77333e-05	0.000433329	0.401697	0.932135	4.36645e-06	2.23802e-05	0.607916	2.25752e-06	5.51166e-06	3.38754e-06	0.00034681	BOTH
FBgn0265988	mv	3L:1950306-1964178	-	Known	YES	0.0308392	0.000546351	0.00371687	0.203698	0.885614	0	0	0.679508	3.1948e-13	1.31645e-12	0.000604813	0.0283654	BOTH
FBgn0266095	lncRNA:CR44832	X:5684985-5685569	-	Known	YES	0.00190708	0.393453	0.658861	0.629883	0.961805	0.74771	0.825456	0.887919	3.21576e-17	1.85192e-16	3.31978e-19	2.37188e-16	BOTH
FBgn0266143	asRNA:CR44849	2L:14019395-14020325	+	Known	YES	0.00242493	0.335843	0.59711	0.772034	0.977966	0.10109	0.183713	0.653284	7.10635e-11	2.44249e-10	0.000193541	0.0110727	BOTH
FBgn0266324	asRNA:CR44989	2L:7220567-7221093	+	Known	YES	0.0649303	4.17453e-07	5.99576e-06	0.622675	0.961699	0.00195831	0.00636184	0.592193	2.29633e-08	6.52707e-08	0.000436997	0.0219676	BOTH
FBgn0266358	lncRNA:CR45006	2L:1345965-1346331	-	Known	YES	0.358669	9.63899e-39	3.8533e-36	0.605556	0.95855	0.575885	0.688053	0.709262	2.91005e-15	1.41131e-14	0.00068757	0.0316525	BOTH
FBgn0266573	tRNA:Thr-TGT-2-3	2R:7292204-7292275	+	Known	RARE	0	1	1	0.954417	0.997891	0.331647	0.460275	0.271395	0.999999	1	0.000881173	0.0384283	BASELINE
FBgn0266694	lncRNA:CR45184	3L:826720-830190	-	Known	YES	0.0150486	0.0161664	0.0648985	0.965992	0.998005	0.0404139	0.0872804	0.32037	0.341288	0.447744	0.00116462	0.0482554	ETOH
FBgn0266698	lncRNA:CR45188	3R:771800-773000	+	Known	YES	0.287783	5.33664e-30	1.11307e-27	0.608696	0.959067	0.00209162	0.0067493	0.838925	6.7265e-19	4.53202e-18	1.03139e-09	2.206e-07	BOTH
FBgn0266702	asRNA:CR45192	3R:1661200-1661900	-	Known	YES	0.0901248	1.94078e-09	4.15104e-08	0.7981	0.981445	5.55391e-09	4.06931e-08	0.841712	5.17812e-24	6.08828e-23	5.24413e-06	0.00050086	BOTH
FBgn0266738	lncRNA:CR45211	3R:11637370-11637630	-	Known	YES	0.00263104	0.316088	0.575359	0.917529	0.994948	0.071223	0.139058	0.799782	1.50903e-18	9.82228e-18	1.59288e-06	0.000176532	BOTH
FBgn0266800	lncRNA:CR45262	2L:9261820-9262804	-	Known	YES	0.0517473	6.72174e-06	7.46416e-05	0.231119	0.894606	0.476063	0.600247	0.787881	1.5086e-15	7.50724e-15	5.50883e-08	8.65623e-06	BOTH
FBgn0266819	asRNA:CR45281	2R:5446760-5452695	-	Known	YES	0.160448	3.12853e-16	1.64407e-14	0.480824	0.943323	0.870065	0.913733	0.869757	2.28102e-30	5.13039e-29	0.000136302	0.00826176	BOTH
FBgn0266824	lncRNA:CR45286	2L:2471644-2472978	-	Known	YES	0.00162718	0.430574	0.696136	0.327308	0.917198	0.00346067	0.0105591	0.869633	3.22164e-22	3.13755e-21	1.84106e-10	4.26365e-08	BOTH
FBgn0266834	lncRNA:CR45296	2L:4256798-4257295	-	Known	YES	0.00302016	0.282727	0.535295	0.812009	0.982269	0.0591085	0.119405	0.538406	6.82588e-05	0.000147271	4.19245e-05	0.00305385	BOTH
FBgn0266961	lncRNA:CR45412	3L:6932149-6932802	-	Known	YES	0.045903	2.29571e-05	0.000226402	0.913777	0.994823	0.00213201	0.00686712	0.492367	0.000235566	0.000484908	0.000295461	0.0156987	BOTH
FBgn0266968	lncRNA:CR45419	3L:6363073-6363691	-	Known	YES	0.0448706	2.85172e-05	0.000274701	0.762737	0.977318	0.602157	0.709768	0.803868	3.15496e-23	3.38154e-22	0.000646412	0.0301061	BOTH
FBgn0266983	lncRNA:CR45434	3L:19447860-19448772	+	Known	YES	0.00193493	0.390016	0.655689	0.697605	0.970217	0.898345	0.933375	0.9457	4.44856e-35	1.62372e-33	5.91012e-15	2.68192e-12	BOTH
FBgn0267035	asRNA:CR45479	X:2067513-2069888	+	Known	YES	0.033722	0.000297364	0.00218788	0.183465	0.878586	0.407313	0.535995	0.957846	0.00059392	0.00117427	9.56676e-80	1.07084e-75	BOTH
FBgn0267121	lncRNA:CR45561	3R:6795389-6796000	+	Known	YES	0.0461367	2.18569e-05	0.000216722	0.962213	0.998005	0.459129	0.584901	0.429051	0.0098017	0.0168222	0.000364463	0.0188577	BOTH
FBgn0267154	lncRNA:CR45594	3R:9456595-9457101	-	Known	YES	0.00210716	0.369683	0.634459	0.131081	0.855742	0.162877	0.267716	0.484377	0.00136525	0.00259027	9.79237e-05	0.00621603	BOTH
FBgn0267164	asRNA:CR45604	X:10983264-10989176	-	Known	YES	0.00975708	0.053105	0.163828	0.836152	0.984416	0.065889	0.130434	0.708539	1.18772e-13	5.05755e-13	8.14726e-05	0.00536441	BOTH
FBgn0267190	lncRNA:CR45630	3R:12232363-12232829	+	Known	YES	0.0296366	0.000704504	0.00462598	0.0837221	0.830382	0.00658801	0.0186314	0.679129	2.39488e-09	7.34028e-09	1.14912e-06	0.000132149	BOTH
FBgn0267246	asRNA:CR45686	3L:1806043-1806932	-	Known	YES	0.00122149	0.494702	0.754135	0.322374	0.91625	0.00556198	0.0160391	0.910317	1.65773e-37	7.62555e-36	6.73641e-05	0.00456066	BOTH
FBgn0267317	lncRNA:CR45753	3L:13279488-13280286	-	Known	YES	0.024384	0.00214886	0.0120812	0.804973	0.982022	0.883773	0.923208	0.710189	1.35515e-12	5.32422e-12	1.31194e-05	0.00113252	BOTH
FBgn0267562	lncRNA:CR45902	3R:2660065-2660689	-	Known	YES	0.197786	4.75904e-20	3.9073e-18	0.914501	0.994823	0.203838	0.319037	0.685089	1.14095e-13	4.8644e-13	0.000688098	0.0316525	BOTH
FBgn0267681	lncRNA:CR46017	3R:8440114-8440922	-	Known	YES	0.00882448	0.0659326	0.192842	0.545469	0.950282	0.301689	0.42855	0.845841	3.45003e-19	2.39413e-18	3.14438e-10	7.18157e-08	BOTH
FBgn0267687	lncRNA:CR46023	3R:10360967-10361945	-	Known	YES	0.0948296	7.038e-10	1.60011e-08	0.437227	0.937861	0.348101	0.476415	0.911637	2.25882e-19	1.59889e-18	2.81974e-22	2.78491e-19	BOTH
FBgn0267692	lncRNA:CR46028	3R:11748651-11749909	-	Known	YES	0.0102731	0.0471658	0.149658	0.38272	0.928629	0.692549	0.782073	0.758126	1.49874e-18	9.75721e-18	0.000402805	0.0205253	BOTH
FBgn0267694	lncRNA:CR46030	3R:12352653-12353138	-	Known	YES	0.0100374	0.0497867	0.155987	0.466	0.943323	0.709409	0.795599	0.72353	9.02816e-11	3.08064e-10	8.40475e-08	1.25436e-05	BOTH
FBgn0267923	lncRNA:CR46204	2L:17450494-17452384	+	Known	YES	0.0122653	0.0300197	0.105996	0.676855	0.967632	0.024589	0.0580604	0.473168	0.000631684	0.00124542	0.000394279	0.0201521	BOTH
FBgn0267986	lncRNA:CR46253	U:3533522-3534680	+	Known	YES	1.11022e-16	1	1	0.899139	0.993311	1.45114e-06	7.9023e-06	0.770953	3.99055e-20	3.05663e-19	0.000710568	0.0324638	BOTH
XLOC_000225		2L:1790694-1792283	+	Anti-Sense	YES	0.0327717	0.000363334	0.00260978	0.139784	0.857031	0.221525	0.340243	0.780178	2.03767e-18	1.30982e-17	2.41376e-05	0.00194239	BOTH
XLOC_000553		2L:4012433-4013411	+	Intergenic	RARE	0.00123757	0.491874	0.751841	0.783126	0.979123	0.0436671	0.0930907	0.301041	0.62518	0.76268	0.000976705	0.0417274	BOTH
XLOC_000985		2L:7039590-7039877	+	Intronic	YES	0.00294399	0.288889	0.542921	0.911427	0.994818	0.962511	0.976296	0.397915	0.0663141	0.100412	0.000230454	0.0127911	BOTH
XLOC_001061		2L:7678934-7680538	+	Intronic	YES	0.00389412	0.222448	0.456561	0.925223	0.995075	2.5659e-07	1.54294e-06	0.310242	0.444092	0.565321	0.00120391	0.0493014	ETOH
XLOC_001864		2L:13610636-13615374	+	Intronic	YES	0.00781217	0.0836742	0.229599	0.994531	0.999564	0.00162386	0.00535943	0.585002	1.6151e-08	4.64541e-08	0.000882927	0.0384548	BOTH
XLOC_002157		2L:15838492-15838621	+	Intergenic	RARE	0.0149429	0.0165473	0.066079	0.28445	0.907834	0.127913	0.221322	0.658924	1	1	3.6301e-21	3.29456e-18	BASELINE
XLOC_002261		2L:16435555-16437375	+	Intronic	YES	0.000929074	0.551517	0.802259	0.773364	0.978333	0.246564	0.368583	0.858398	1.05521e-28	2.02596e-27	0.000146473	0.00876009	BOTH
XLOC_002553		2L:18649725-18654520	+	Anti-Sense	YES	0.0107586	0.0422129	0.137582	0.151961	0.863604	0.0129889	0.0336569	0.789205	3.62078e-10	1.18171e-09	1.17529e-13	4.53635e-11	BOTH
XLOC_002705		2L:19820814-19822811	+	Intronic	YES	0.00110427	0.516183	0.772434	0.683305	0.968295	0.185494	0.296317	0.304491	0.594078	0.729242	0.000921072	0.0397553	ETOH
XLOC_002917		2L:21707738-21710553	+	Intronic	YES	0.00654975	0.113345	0.287124	0.611679	0.960143	0.000626148	0.00226268	0.75878	3.09246e-17	1.78428e-16	6.44494e-05	0.0043988	BOTH
XLOC_003064		2L:22822304-22825797	+	Intronic	YES	0.000457849	0.67596	0.900422	0.258526	0.899215	0.198551	0.31252	0.592257	2.92896e-07	7.65406e-07	7.09894e-05	0.00478544	BOTH
XLOC_003327		2L:2024375-2030837	-	Anti-Sense	YES	0.0635513	5.58716e-07	7.83042e-06	0.0929637	0.833784	0.968798	0.980273	0.816458	2.62201e-20	2.05478e-19	1.67327e-06	0.00018483	BOTH
XLOC_003519		2L:3495926-3499316	-	Intronic	YES	0.00032776	0.723609	0.933561	0.138959	0.856759	0.0487744	0.102068	0.407231	0.0121375	0.0205857	0.000932771	0.0401056	BOTH
XLOC_003550		2L:3644122-3644835	-	Intronic	YES	0.000218485	0.772793	0.964705	0.80522	0.982022	0.0559081	0.114059	0.411275	0.78615	0.929616	8.02933e-07	9.76184e-05	ETOH
XLOC_004075		2L:7937464-7937689	-	Intronic	YES	0.0111515	0.0386041	0.128336	0.366375	0.926062	0.00886312	0.0241755	0.381728	0.404467	0.520703	3.25899e-05	0.00245925	ETOH
XLOC_004080		2L:7953539-7956807	-	Intronic	YES	0.0071679	0.0975953	0.257625	0.00229042	0.637596	5.9508e-13	6.70853e-12	0.808056	8.88038e-22	8.25591e-21	5.8796e-05	0.0040787	BOTH
XLOC_004195		2L:8720483-8723171	-	Intronic	YES	0.0281174	0.000971808	0.00611913	0.431121	0.937679	1.113e-08	7.88302e-08	0.74431	2.23254e-15	1.09507e-14	2.27964e-05	0.00185802	BOTH
XLOC_004330		2L:9556421-9560083	-	Intronic	YES	0.00439037	0.195108	0.418936	0.817712	0.982376	0.0245815	0.0580468	0.803442	1.95593e-21	1.73435e-20	7.11118e-05	0.00478544	BOTH
XLOC_004752		2L:12933007-12933501	-	Intergenic	RARE	6.31087e-06	0.960866	1	0.00435763	0.70164	0.000111319	0.000463962	0.401925	0.446917	0.568357	7.24863e-06	0.000666874	BOTH
XLOC_004824		2L:13538234-13540664	-	Intronic	YES	0.000192259	0.786515	0.97415	0.14444	0.859346	0.304214	0.431302	0.362568	0.285693	0.381835	0.00018838	0.0108318	ETOH
XLOC_005031		2L:14952119-14953719	-	Intronic	YES	0.000535523	0.651227	0.881942	0.255065	0.898047	0.999362	0.99969	0.383365	0.162499	0.228658	0.000148468	0.00885536	ETOH
XLOC_005156		2L:15641084-15641208	-	Intergenic	RARE	0.00112942	0.511441	0.768111	0.257022	0.898166	0.163814	0.268974	0.281056	0.999999	1	0.000571804	0.0273911	BASELINE
XLOC_005414		2L:17656002-17657051	-	Intronic	YES	0.00911568	0.061607	0.183222	0.192789	0.881547	0.00819035	0.0225493	0.546906	1	1	1.30721e-13	4.93215e-11	ETOH
XLOC_005739		2L:20113722-20119074	-	Intergenic	YES	0.00064486	0.619839	0.856975	0.586465	0.956092	0.0126669	0.0329295	0.604343	8.33356e-08	2.26923e-07	7.2288e-05	0.00484517	BOTH
XLOC_005772		2L:20332319-20334062	-	Intronic	YES	0.00825556	0.0753443	0.212414	0.360257	0.925155	0.0794095	0.151655	0.907811	4.97633e-28	9.00352e-27	1.90879e-11	5.16914e-09	BOTH
XLOC_005889		2L:21298091-21298310	-	Intronic	YES	0.00230508	0.348091	0.610573	0.956678	0.997891	0.494266	0.616835	0.289812	0.928777	1	0.000670108	0.0309522	ETOH
XLOC_005923		2L:21697927-21698121	-	Intronic	RARE	1.11022e-16	1	1	0.192768	0.881547	0.000781677	0.00277115	0.878187	1	1	5.65794e-55	3.16656e-51	BASELINE
XLOC_005936		2L:21751544-21753046	-	Intronic	YES	0.0107467	0.0423275	0.137862	0.265999	0.902442	0.315975	0.443957	0.337189	0.466291	0.590335	0.000297251	0.0157689	ETOH
XLOC_006275		2R:50504-52495	+	Intergenic	YES	0.00388544	0.222965	0.457372	0.53358	0.949654	0.00284695	0.00887691	0.689209	0.000108276	0.000229352	1.24078e-12	3.85789e-10	BOTH
XLOC_006591		2R:2553482-2554069	+	Intronic	YES	0.000293693	0.737811	0.943436	0.28978	0.909259	0.0023479	0.00749202	0.27372	0.999999	1	0.000350132	0.0182004	BOTH
XLOC_006674		2R:3362085-3369955	+	Anti-Sense	YES	3.99043e-06	0.968877	1	0.464744	0.943323	0.648944	0.747438	0.543322	0.00164625	0.00309429	9.95371e-07	0.000117279	BOTH
XLOC_006851		2R:5045249-5046778	+	Anti-Sense	YES	0.0725216	8.35585e-08	1.37477e-06	0.094517	0.833784	1.87944e-05	8.80993e-05	0.87971	2.61546e-21	2.28063e-20	7.12235e-13	2.25631e-10	BOTH
XLOC_006861		2R:5100160-5100373	+	Intergenic	RARE	0.00362048	0.239468	0.480998	0.540174	0.949726	0.600864	0.708766	0.363701	0.286743	0.383054	0.000176036	0.0102626	BASELINE
XLOC_006895		2R:5369257-5369379	+	Intergenic	RARE	-2.22045e-16	1	1	0.721676	0.97329	0.0382297	0.0833895	0.6126	0.964236	1	7.10653e-17	4.11443e-14	BASELINE
XLOC_006956		2R:6016535-6019126	+	Intronic	YES	0.00568881	0.140134	0.334182	0.49437	0.945182	4.44089e-16	6.85785e-15	0.462732	0.000526881	0.00104696	0.000823616	0.0364557	BOTH
XLOC_007051		2R:7021666-7021782	+	Intergenic	RARE	0.00658272	0.112438	0.285393	0.632601	0.962565	0.0014251	0.00476861	0.419624	0.999999	1	1.47e-07	2.09163e-05	BASELINE
XLOC_007420		2R:9801624-9802487	+	Intronic	YES	0.0412283	6.12982e-05	0.000540402	0.477937	0.943323	0.703397	0.790785	0.737549	6.29239e-14	2.73951e-13	5.00802e-06	0.00048186	BOTH
XLOC_007470		2R:10354846-10354975	+	Intergenic	RARE	0	1	1	0.901347	0.993891	0.00898388	0.0244751	0.587093	0.959616	1	3.45865e-15	1.68321e-12	BASELINE
XLOC_007486		2R:10423164-10438302	+	Anti-Sense	YES	0.00929	0.0591625	0.177795	0.143527	0.859346	3.44169e-15	4.92097e-14	0.663978	2.48131e-12	9.54655e-12	0.000638856	0.029837	BOTH
XLOC_007488		2R:10440610-10443038	+	Anti-Sense	YES	0.0004251	0.68713	0.908662	0.668533	0.966042	0.0544971	0.111716	0.416339	0.0479946	0.0744656	0.00012253	0.00748099	BOTH
XLOC_007641		2R:11636104-11636862	+	Intronic	YES	0.0039375	0.219884	0.453267	0.30126	0.911631	0.136364	0.232611	0.385952	0.999999	1	5.95856e-07	7.49395e-05	BASELINE
XLOC_007905		2R:13724044-13725376	+	Intronic	YES	0.0182626	0.0080083	0.0365577	0.51044	0.946647	0.0946387	0.174447	0.353994	0.5104	0.638214	0.000100427	0.00636291	ETOH
XLOC_008056		2R:15070793-15071810	+	Intronic	YES	0.160968	2.77485e-16	1.48375e-14	0.878902	0.99055	0.663999	0.758905	0.351027	0.626472	0.763924	7.48966e-05	0.00498025	BASELINE
XLOC_008080		2R:15124964-15125242	+	Intronic	YES	0.00168352	0.422697	0.688201	0.980947	0.999388	2.62372e-05	0.000120679	0.393343	0.577897	0.71206	6.84566e-06	0.000633271	ETOH
XLOC_008093		2R:15181870-15182673	+	Intronic	YES	0.00656235	0.112997	0.28644	0.705399	0.970886	0.66832	0.76234	0.498923	0.947875	1	1.77009e-10	4.12775e-08	ETOH
XLOC_008206		2R:15960863-15963174	+	Intergenic	YES	0.00201729	0.380102	0.645582	0.881492	0.990917	0.72828	0.810267	0.922714	2.10428e-25	2.86923e-24	6.9259e-18	4.38814e-15	BOTH
XLOC_008455		2R:17640641-17640765	+	Intergenic	RARE	0	1	1	0.374972	0.928287	1.09568e-05	5.3011e-05	0.598559	0.999998	1	2.78029e-16	1.53053e-13	BASELINE
XLOC_008515		2R:18151327-18151883	+	Intronic	YES	0.00216575	0.363104	0.627364	0.945073	0.996993	0.393418	0.5224	0.430733	0.813527	0.956286	1.62056e-07	2.25802e-05	ETOH
XLOC_008585		2R:18856278-18856392	+	Intergenic	RARE	3.34956e-06	0.971484	1	0.436399	0.937679	0.843662	0.895546	0.282647	0.999999	1	0.000283532	0.0152093	BOTH
XLOC_008670		2R:19531519-19532101	+	Intronic	YES	0.000717	0.600904	0.842485	0.250535	0.896484	0.967775	0.979677	0.392227	0.781274	0.924718	3.1539e-06	0.000326877	BOTH
XLOC_008960		2R:707548-709348	-	Intronic	YES	0.00161649	0.432093	0.697517	0.984636	0.999388	0.93834	0.960313	0.676451	1.79613e-08	5.15241e-08	2.56041e-07	3.43914e-05	BOTH
XLOC_009002		2R:1014028-1014637	-	Intronic	YES	0.000958319	0.545317	0.796909	0.268035	0.903651	0.000628957	0.00227242	0.245251	1	1	0.00117752	0.0485762	ETOH
XLOC_009127		2R:2158969-2159172	-	Intergenic	YES	0.0139512	0.0206054	0.0788075	0.298203	0.910864	0.938119	0.960269	0.374687	0.999999	1	9.47955e-07	0.000112086	BOTH
XLOC_009204		2R:2826038-2826473	-	Intronic	YES	0.00202965	0.378645	0.643998	0.475274	0.943323	0.119483	0.209793	0.293649	0.760941	0.904509	0.000906946	0.0392465	ETOH
XLOC_009255		2R:3415513-3416325	-	Intronic	YES	0.00142733	0.460402	0.723662	0.748543	0.976731	5.57545e-09	4.08242e-08	0.666818	8.17014e-12	3.01388e-11	0.000248997	0.0137041	BOTH
XLOC_009595		2R:6256920-6257934	-	Intronic	YES	0.000886203	0.560849	0.810315	0.343744	0.921448	0.0394214	0.0855388	0.51092	0.824829	0.96764	9.50126e-11	2.26278e-08	ETOH
XLOC_009708		2R:7322871-7323425	-	Intergenic	YES	0.00178517	0.409018	0.674186	0.270676	0.90406	5.51051e-07	3.16562e-06	0.405129	0.999999	1	1.4917e-07	2.10467e-05	BASELINE
XLOC_010385		2R:12591219-12591754	-	Intronic	YES	0.00963892	0.0545728	0.167265	0.0679698	0.817718	0.283021	0.409057	0.418084	0.183908	0.256091	1.48005e-05	0.00126463	BOTH
XLOC_010461		2R:13329053-13329397	-	Anti-Sense	YES	2.38149e-05	0.924062	1	0.0142991	0.728283	0.727143	0.809351	0.41599	0.52169	0.650635	1.88264e-06	0.000206598	ETOH
XLOC_010636		2R:14747399-14747564	-	Intergenic	RARE	0.00159532	0.435127	0.700492	0.186094	0.880184	8.93832e-05	0.000378169	0.569645	0.633745	0.7717	2.92332e-13	1.01201e-10	BASELINE
XLOC_010713		2R:15306330-15306981	-	Intronic	YES	0.000986669	0.539428	0.792146	0.904757	0.994217	0.583497	0.694287	0.361496	0.739281	0.882324	2.66606e-05	0.00210156	BOTH
XLOC_010714		2R:15308241-15308573	-	Intronic	YES	1.9454e-05	0.931347	1	0.0215051	0.75061	0.127062	0.220207	0.354967	0.754288	0.897682	3.72536e-05	0.00276765	ETOH
XLOC_010734		2R:15422665-15423289	-	Intronic	YES	0.00148849	0.450943	0.715018	0.262938	0.901554	0.285424	0.41152	0.537424	0.000120211	0.00025372	2.66513e-05	0.00210156	BOTH
XLOC_010820		2R:15836530-15837281	-	Intergenic	YES	0.128134	4.73503e-13	1.71154e-11	0.645701	0.964347	6.29485e-08	4.0829e-07	0.456323	0.00857615	0.0148432	8.48071e-05	0.00554051	BASELINE
XLOC_011029		2R:17321729-17322013	-	Intronic	YES	2.42402e-07	0.992327	1	0.350282	0.922526	0.945848	0.965186	0.764091	0.781798	0.925175	5.8028e-31	1.08255e-27	ETOH
XLOC_011438		2R:20943279-20945128	-	Intergenic	YES	0.182059	2.02064e-18	1.40141e-16	0.871574	0.989829	0.494018	0.616664	0.828856	2.09808e-14	9.46701e-14	4.44548e-13	1.49279e-10	BOTH
XLOC_011672		2RHet:1364378-1422812	+	Intergenic	RARE	0	1	1	0.0388666	0.771133	0.0332652	0.0745463	0.788825	1	1	6.00002e-36	1.67901e-32	BASELINE
XLOC_011717		2RHet:1952928-1954207	+	Intronic	YES	0	1	1	0.948901	0.997654	0.123131	0.214896	0.394328	0.428674	0.548168	1.30893e-05	0.00113252	BASELINE
XLOC_011739		2RHet:2355703-2357866	+	Intergenic	RARE	0	1	1	0.940652	0.996077	0.901984	0.935969	0.398386	0.0295156	0.0473638	0.000585992	0.027798	BOTH
XLOC_011853		2RHet:623448-624599	-	Intronic	YES	0	1	1	0.487556	0.944258	0.651613	0.749664	0.548981	2.33418e-05	5.23557e-05	5.05534e-05	0.00356635	BOTH
XLOC_011910		2RHet:935206-935919	-	Intronic	YES	0	1	1	0.566075	0.95288	0.00441327	0.0130874	0.595792	5.89415e-07	1.50468e-06	3.09034e-05	0.00235849	BOTH
XLOC_011979		2RHet:1607236-1607966	-	Intronic	YES	0	1	1	0.575439	0.955118	0.42067	0.548627	0.464275	0.00274745	0.00504508	0.00017133	0.0100252	BOTH
XLOC_012011		2RHet:1963869-1968537	-	Anti-Sense	YES	0	1	1	0.376641	0.928536	0.00211962	0.00683111	0.857642	1.31258e-29	2.76167e-28	0.000494383	0.0245126	BOTH
XLOC_012108		2RHet:3269675-3269823	-	Intergenic	YES	0	1	1	0.986689	0.999388	1.89071e-13	2.24849e-12	0.560165	0.958991	1	1.37396e-13	5.12638e-11	BASELINE
XLOC_012109		2RHet:3274601-3274728	-	Intergenic	RARE	1.11022e-16	1	1	0.391927	0.930552	0.00424813	0.0126625	0.348488	0.989362	1	2.42013e-05	0.00194239	BASELINE
XLOC_012114		3L:29004-33134	+	Intergenic	RARE	0.617368	1.06151e-81	6.28292e-78	0.326376	0.917198	0.59674	0.705273	0.696009	2.20502e-08	6.27708e-08	1.80992e-08	3.05413e-06	BOTH
XLOC_012170		3L:680872-682779	+	Anti-Sense	YES	0.00743273	0.0915912	0.245736	0.670354	0.966042	0.862689	0.908565	0.313602	0.852726	0.994893	0.000260622	0.0141799	BASELINE
XLOC_012248		3L:1211209-1211942	+	Intronic	YES	0.0433696	3.9089e-05	0.0003629	0.00580382	0.703237	0.0402218	0.0869272	0.642853	1.63043e-11	5.88646e-11	0.00104741	0.0442608	BOTH
XLOC_012525		3L:3495574-3496815	+	Intronic	YES	0.0109972	0.0399813	0.131819	0.176994	0.876213	0.708932	0.795171	0.434216	0.151651	0.214618	7.04589e-06	0.000650002	ETOH
XLOC_012544		3L:3541862-3542618	+	Intronic	YES	0.00182842	0.403395	0.668161	0.483885	0.943412	0.168837	0.27545	0.270352	0.999999	1	0.000598519	0.0281883	BASELINE
XLOC_012554		3L:3564753-3564994	+	Intronic	YES	0.00198204	0.384301	0.64979	0.614682	0.961163	0.230383	0.350529	0.351468	0.390096	0.504153	0.000196798	0.0112389	ETOH
XLOC_012566		3L:3587254-3587502	+	Intronic	YES	0.00394243	0.219596	0.452894	0.4662	0.943323	0.94275	0.963216	0.286163	0.78691	0.930339	0.00118422	0.0486951	ETOH
XLOC_013020		3L:6880667-6880794	+	Intergenic	RARE	0	1	1	0.537367	0.949726	0.0108933	0.0289121	0.447111	1	1	5.89182e-09	1.10529e-06	BASELINE
XLOC_013141		3L:7613629-7616594	+	Intronic	YES	0.0031918	0.269435	0.518014	0.331859	0.918132	0.000131308	0.000539041	0.393953	0.01802	0.0298319	0.00122425	0.0499517	BOTH
XLOC_013456		3L:9761009-9761937	+	Intronic	YES	0.00755252	0.0890079	0.240767	0.911533	0.994818	0.195201	0.308329	0.266386	0.999999	1	0.000561996	0.0270758	BASELINE
XLOC_013476		3L:9971936-9972378	+	Intronic	YES	0.00584531	0.134783	0.324655	0.500406	0.94658	0.218506	0.336503	0.812594	2.28432e-24	2.78734e-23	0.000816802	0.0362807	BOTH
XLOC_013702		3L:11290920-11295812	+	Intergenic	YES	0.0893125	2.31135e-09	4.87533e-08	0.261853	0.900893	0.0935857	0.172981	0.491855	0.00131372	0.00249757	6.25741e-05	0.00429701	BOTH
XLOC_014867		3L:18644154-18644900	+	Intronic	YES	0.000684187	0.609361	0.849095	0.686361	0.968909	0.672461	0.765803	0.259933	1	1	0.00116543	0.0482554	ETOH
XLOC_015422		3L:23334703-23337033	+	Intronic	YES	0.00102207	0.532236	0.786225	0.626862	0.961717	0	0	0.530476	0.118013	0.170541	3.72203e-09	7.22461e-07	ETOH
XLOC_015466		3L:23747375-23748356	+	Intergenic	YES	0.0726142	8.19307e-08	1.35063e-06	0.420121	0.935077	0.174064	0.281763	0.825211	6.0464e-12	2.25373e-11	1.44896e-15	7.26212e-13	BOTH
XLOC_015538		3L:24221987-24223875	+	Intronic	YES	0.116525	6.19963e-12	1.91149e-10	0.122454	0.85495	0.384086	0.51303	0.624323	8.02721e-10	2.54994e-09	0.000388856	0.0199051	BOTH
XLOC_015562		3L:19704-27775	-	Anti-Sense	YES	0.563913	7.80771e-71	2.62183e-67	0.0861131	0.831485	0.0976854	0.178768	0.910447	3.80041e-25	5.04617e-24	6.51587e-15	2.91737e-12	BOTH
XLOC_015563		3L:28828-38527	-	Intergenic	YES	0.514886	5.62092e-62	8.20654e-59	0.0101531	0.713503	0.178378	0.287246	0.888284	5.9614e-34	1.90289e-32	0.000225651	0.0125453	BOTH
XLOC_015597		3L:464585-473972	-	Intronic	YES	0.000298476	0.735763	0.941927	0.125655	0.85495	0.655037	0.752263	0.556608	3.36886e-05	7.46167e-05	2.05942e-05	0.00169084	BOTH
XLOC_015709		3L:1178381-1179180	-	Intergenic	RARE	0.00986044	0.0518552	0.160785	0.539605	0.949726	0.613308	0.718722	0.254692	0.999999	1	0.00094805	0.0405548	ETOH
XLOC_016733		3L:8711211-8711530	-	Intergenic	RARE	0.169029	4.28725e-17	2.57082e-15	0.346979	0.921448	0.195583	0.308805	0.505125	4.88742e-05	0.000106821	0.000491714	0.0244618	BOTH
XLOC_017042		3L:11078860-11080211	-	Intronic	YES	0.0264997	0.00136978	0.00823439	0.376496	0.928536	0.114924	0.20361	0.466051	0.000556008	0.0011023	0.000657024	0.0303896	BOTH
XLOC_017108		3L:11492195-11492330	-	Intergenic	RARE	-2.22045e-16	1	1	0.660142	0.965599	0.0369541	0.0810918	0.368696	0.96699	1	7.45267e-06	0.000683773	BASELINE
XLOC_017189		3L:12046079-12046970	-	Intronic	YES	0.000672389	0.612464	0.851578	0.845585	0.98566	0.20017	0.314524	0.380347	0.398799	0.514253	3.6483e-05	0.00271641	ETOH
XLOC_017259		3L:12534776-12535192	-	Anti-Sense	YES	0.012843	0.0263736	0.0956398	0.823356	0.98274	1.2333e-05	5.92674e-05	0.769437	0.100831	0.147818	2.07496e-27	3.16714e-24	BOTH
XLOC_017551		3L:14488075-14489236	-	Intronic	YES	0.0626673	6.73422e-07	9.26025e-06	0.606136	0.95855	0.264236	0.38836	0.514671	0.00031654	0.000643154	5.38062e-05	0.00376419	BOTH
XLOC_017693		3L:15343241-15344634	-	Intergenic	YES	0.0181047	0.00828759	0.0376434	0.879528	0.990639	0.134983	0.230786	0.476674	0.000374689	0.00075577	0.000502481	0.0248137	BOTH
XLOC_017832		3L:15947109-15947624	-	Intronic	YES	0.191319	2.24146e-19	1.70676e-17	0.460394	0.943208	1.74527e-13	2.07995e-12	0.422237	0.586709	0.721409	8.70665e-07	0.000104418	BOTH
XLOC_018019		3L:17190711-17191953	-	Intronic	YES	0.0079103	0.0817489	0.225665	0.58474	0.955603	0.00297727	0.0092395	0.32826	0.941097	1	9.07497e-05	0.0058156	ETOH
XLOC_018077		3L:17606821-17607913	-	Intronic	YES	0.00138398	0.4673	0.72979	0.146808	0.860501	0.082508	0.15623	0.297303	1	1	0.000171366	0.0100252	ETOH
XLOC_018139		3L:18170871-18171913	-	Intronic	YES	0.000122448	0.828878	1	0.620284	0.961699	0.919693	0.94829	0.35698	1	1	8.12646e-06	0.00073953	ETOH
XLOC_018333		3L:19377471-19378222	-	Intronic	YES	0.0276487	0.00107334	0.00666839	0.226073	0.894591	0.469275	0.594106	0.388543	0.771229	0.914775	4.21207e-06	0.000417231	ETOH
XLOC_018344		3L:19487137-19487432	-	Intronic	YES	0.0196248	0.00596339	0.02864	0.022436	0.75061	8.99155e-10	7.18896e-09	0.732877	9.07474e-05	0.000193688	5.15949e-16	2.70712e-13	BOTH
XLOC_018352		3L:19572131-19572798	-	Intronic	YES	0.00618209	0.124021	0.306313	0.406973	0.933006	0.598109	0.706435	0.358041	1	1	2.43234e-06	0.000259295	ETOH
XLOC_018411		3L:20115890-20116017	-	Intergenic	RARE	1.11022e-16	1	1	0.573247	0.95477	0.014137	0.0361756	0.631725	0.972127	1	2.86446e-18	1.92377e-15	BASELINE
XLOC_018636		3L:21829232-21829644	-	Anti-Sense	YES	0.00595148	0.131282	0.318791	0.992103	0.999564	0.220333	0.33887	0.372595	0.0653677	0.0990725	0.000878217	0.0383492	BOTH
XLOC_018870		3L:23605963-23612500	-	Anti-Sense	YES	0.0258243	0.00158126	0.00930574	0.513178	0.946876	0.000341796	0.00129835	0.811733	8.8659e-24	1.01714e-22	0.000458962	0.0229344	BOTH
XLOC_018872		3L:23624770-23630798	-	Anti-Sense	YES	0.0266493	0.00132693	0.00800976	0.835465	0.984416	0.499754	0.621444	0.819171	3.31995e-24	3.98442e-23	0.000282421	0.0151983	BOTH
XLOC_018924		3L:23935852-23936004	-	Intronic	YES	0	1	1	0.301754	0.911631	1.28755e-06	7.05724e-06	0.736607	1	1	2.82913e-28	4.7501e-25	BASELINE
XLOC_018926		3L:23946312-23947176	-	Intronic	YES	0.0139387	0.0206627	0.0789727	0.529985	0.94889	0.0552447	0.112945	0.334671	0.337252	0.442899	0.000600933	0.0282624	BOTH
XLOC_018936		3L:24013727-24013860	-	Intergenic	RARE	0.00426286	0.201736	0.427914	0.325035	0.917198	1.12457e-05	5.4338e-05	0.580286	1	1	5.46061e-15	2.51188e-12	BASELINE
XLOC_019222		3LHet:1749422-1750103	+	Intergenic	YES	0	1	1	0.92236	0.995075	0.0708598	0.13846	0.781822	2.85899e-21	2.4846e-20	0.000846363	0.0372489	BOTH
XLOC_019226		3LHet:1761813-1762876	+	Intergenic	YES	0	1	1	0.561422	0.952665	0.55593	0.671379	0.85293	3.51446e-26	5.25215e-25	1.41544e-05	0.00121873	BOTH
XLOC_019256		3LHet:1921556-1921773	+	Intergenic	YES	1.11022e-16	1	1	0.72415	0.973383	0.458166	0.584051	0.972993	2.25987e-50	4.26329e-48	7.29698e-14	2.91705e-11	BOTH
XLOC_019272		3LHet:2027642-2028553	+	Intergenic	YES	0	1	1	0.395386	0.931346	0.00281972	0.00880427	0.894113	3.42166e-28	6.28209e-27	6.78915e-09	1.25264e-06	BOTH
XLOC_019280		3LHet:2072558-2073630	+	Intergenic	YES	0	1	1	0.297654	0.910557	0.354543	0.482763	0.874897	2.02921e-28	3.79192e-27	2.97284e-06	0.000310308	BOTH
XLOC_019283		3LHet:2082007-2086738	+	Intergenic	YES	0	1	1	0.726597	0.973383	0.843192	0.895188	0.840995	4.13361e-21	3.53108e-20	4.74545e-08	7.62451e-06	BOTH
XLOC_019338		3LHet:2522290-2522557	+	Intronic	YES	-1.11022e-16	1	1	0.195533	0.88363	0.284476	0.41063	0.783681	4.72278e-21	4.00583e-20	0.000531575	0.0260647	BOTH
XLOC_019584		3R:492047-492574	+	Intronic	YES	0.00601573	0.129213	0.315126	0.597796	0.957896	0.557426	0.672558	0.789667	8.09007e-05	0.000173599	4.22949e-22	4.05789e-19	BOTH
XLOC_019738		3R:1952458-1954589	+	Anti-Sense	YES	0.00341502	0.253291	0.498866	0.920822	0.994948	0.06499	0.128968	0.82788	7.6032e-24	8.79186e-23	4.78641e-05	0.00342703	BOTH
XLOC_020046		3R:4228781-4228903	+	Intronic	RARE	-2.22045e-16	1	1	0.709295	0.972214	0.0221156	0.0531282	0.706684	0.964737	1	7.98708e-25	9.93356e-22	BASELINE
XLOC_020175		3R:5074898-5075381	+	Intronic	YES	0.0713606	1.06918e-07	1.73026e-06	0.972126	0.998989	0.553533	0.669207	0.750478	4.07593e-07	1.05341e-06	5.78894e-14	2.34208e-11	BOTH
XLOC_021257		3R:14776893-14777298	+	Intronic	YES	0.00350508	0.247115	0.490985	0.397391	0.931477	0.0155394	0.0392453	0.424187	0.015878	0.0265055	0.000287169	0.0153553	ETOH
XLOC_021351		3R:15381009-15381564	+	Intronic	YES	0.0229707	0.00290596	0.0155882	0.26382	0.901862	0.640861	0.740823	0.337288	0.537892	0.668409	0.000222255	0.0123982	ETOH
XLOC_021386		3R:15531285-15531419	+	Intergenic	RARE	0	1	1	0.116905	0.851377	0.0139642	0.0358059	0.508383	1	1	3.68104e-11	9.43582e-09	BASELINE
XLOC_021418		3R:15737583-15737829	+	Intronic	YES	0.00927408	0.0593815	0.178289	0.78279	0.978978	0	0	0.426116	0.00874428	0.0151178	0.000480279	0.0239284	BOTH
XLOC_021545		3R:16820304-16820526	+	Intronic	YES	3.31548e-05	0.910453	1	0.115276	0.848867	0.796788	0.862339	0.30229	0.999999	1	6.12994e-05	0.00422979	ETOH
XLOC_021587		3R:17263144-17263947	+	Intergenic	YES	0.00136443	0.470463	0.732737	0.0534187	0.800256	0	0	0.530848	0.999999	1	1.8916e-12	5.67141e-10	BASELINE
XLOC_021865		3R:19553098-19553946	+	Intronic	YES	0.0242863	0.00219411	0.0122982	0.183763	0.878696	0.614085	0.719282	0.610318	7.77878e-09	2.29354e-08	0.000247621	0.0136537	BOTH
XLOC_022074		3R:21353101-21356586	+	Intronic	YES	0.0320582	0.000422362	0.00297087	0.122617	0.85495	5.8425e-05	0.000254051	0.57459	1.10234e-06	2.75667e-06	9.56862e-05	0.00609705	BOTH
XLOC_022478		3R:24958227-24958993	+	Intronic	YES	0.000862357	0.566171	0.815104	0.851424	0.986404	0	0	0.295412	1	1	8.66473e-05	0.0056062	BOTH
XLOC_023305		3R:3154543-3156356	-	Intergenic	YES	0.00222538	0.356572	0.620027	0.125474	0.85495	0.967993	0.979754	0.450034	0.00137782	0.00261322	0.000730223	0.0332261	BOTH
XLOC_023589		3R:5205965-5206347	-	Intronic	YES	0.000744362	0.594039	0.837265	0.9513	0.997891	0.210205	0.326744	0.392331	0.504535	0.63175	1.02358e-05	0.000909303	ETOH
XLOC_023629		3R:5660327-5660690	-	Intronic	YES	0.00269529	0.310242	0.567846	0.259523	0.899656	0.158473	0.261952	0.586447	0.10276	0.150377	9.44815e-12	2.62206e-09	BOTH
XLOC_023713		3R:6421636-6422145	-	Intronic	YES	0.0196709	0.0059044	0.0284014	0.810594	0.982258	0.189297	0.300989	0.362069	0.791538	0.934791	2.1263e-05	0.00174149	ETOH
XLOC_024222		3R:10260811-10261418	-	Intronic	YES	0.0085526	0.0702634	0.202059	0.358321	0.924426	0.848945	0.899285	0.355135	0.451869	0.574067	0.000121311	0.00743364	ETOH
XLOC_024397		3R:11729189-11729658	-	Intronic	YES	5.55112e-16	1	1	0.0418739	0.773688	0.119204	0.209387	0.971447	1.13151e-53	3.333e-51	6.38454e-10	1.41048e-07	BOTH
XLOC_024874		3R:15430657-15433506	-	Anti-Sense	YES	0.0209599	0.00447262	0.0224433	0.907959	0.994505	0.0505065	0.104954	0.686127	1.39176e-13	5.89273e-13	0.000564945	0.0271788	BOTH
XLOC_025185		3R:18074149-18074284	-	Intronic	RARE	0	1	1	0.442724	0.938826	0.00938887	0.0254504	0.313041	0.897777	1	0.000233603	0.0129445	BASELINE
XLOC_025198		3R:18101315-18103276	-	Intronic	YES	0.0247711	0.00197868	0.0112636	0.199347	0.88363	0.077245	0.148323	0.357758	0.384662	0.498012	0.000143706	0.00864814	BOTH
XLOC_025212		3R:18168193-18168776	-	Intergenic	RARE	0.00192726	0.390958	0.656583	0.606164	0.95855	0.128793	0.222463	0.277156	0.999999	1	0.000146237	0.00876009	BASELINE
XLOC_025403		3R:19684480-19685131	-	Intergenic	YES	0.00992477	0.051093	0.159171	0.80178	0.981673	0.388956	0.517867	0.24953	0.999999	1	0.000779856	0.0349633	BASELINE
XLOC_025419		3R:19831029-19831234	-	Intronic	YES	0.00162222	0.431278	0.69676	0.810081	0.982258	0.0376715	0.0823646	0.361273	0.115628	0.167434	0.00076308	0.0343488	ETOH
XLOC_025799		3R:22598479-22600697	-	Intergenic	YES	0.217655	3.77457e-22	3.72795e-20	0.530635	0.94936	0.476075	0.600247	0.747868	5.04858e-15	2.40197e-14	8.43869e-06	0.000763804	BOTH
XLOC_025979		3R:24485448-24486498	-	Intergenic	RARE	0.000885065	0.561101	0.810468	0.477406	0.943323	0.0261727	0.0611037	0.247547	0.999999	1	0.00106333	0.0446331	BASELINE
XLOC_025988		3R:24544114-24544924	-	Anti-Sense	YES	0.349361	1.53051e-37	5.58635e-35	0.28173	0.907173	0.891209	0.928779	0.777019	5.46105e-21	4.60759e-20	0.0010251	0.043518	BOTH
XLOC_026004		3R:24684349-24684675	-	Intronic	YES	0.00290508	0.292103	0.546331	0.0900911	0.833389	0.0475694	0.0999087	0.482334	0.237787	0.323335	6.91161e-08	1.05019e-05	BOTH
XLOC_026121		3R:25744131-25744264	-	Intronic	YES	0.0304825	0.000589122	0.00396368	0.28593	0.908619	0	0	0.486775	0.223099	0.30516	5.43525e-08	8.60923e-06	BOTH
XLOC_026234		3R:26658545-26661394	-	Anti-Sense	YES	0.0439078	3.49104e-05	0.000328097	0.253983	0.897322	0.840388	0.89324	0.794319	8.42729e-22	7.85424e-21	0.000376782	0.0194054	BOTH
XLOC_026268		3R:26845563-26845729	-	Intergenic	RARE	0.0413471	5.97876e-05	0.000528194	0.724171	0.973383	0.743833	0.822609	0.386514	0.0333485	0.0530957	0.000937189	0.040244	BOTH
XLOC_026279		3R:26908257-26909129	-	Anti-Sense	RARE	6.42063e-07	0.987513	1	0.196913	0.88363	0.252981	0.375996	0.304492	0.999999	1	6.37239e-05	0.00435815	BASELINE
XLOC_026303		3R:27014700-27016036	-	Intronic	YES	0.0123352	0.0295525	0.104748	0.106758	0.845103	0.87223	0.915141	0.368158	0.586048	0.720755	3.23401e-05	0.00245142	BASELINE
XLOC_026380		3R:27727179-27727548	-	Intronic	YES	0.00416246	0.207141	0.435391	0.987876	0.999388	0.000352595	0.00133529	0.364817	1	1	4.30324e-06	0.000425008	BASELINE
XLOC_026550		3RHet:1851949-1853362	+	Anti-Sense	YES	0	1	1	0.374384	0.928287	0.0567889	0.115533	0.881035	1.19527e-14	5.51639e-14	3.27509e-21	3.05493e-18	BOTH
XLOC_026584		3RHet:2009241-2009602	+	Intronic	YES	0	1	1	0.698595	0.970217	0.317797	0.44584	0.470069	0.0211297	0.0345917	1.14394e-05	0.00101088	ETOH
XLOC_026774		4:286675-288914	+	Anti-Sense	YES	0.000279327	0.744074	0.947119	0.552513	0.950959	0.00180862	0.00591112	0.418271	0.35892	0.468006	3.92159e-06	0.000389607	BOTH
XLOC_026901		4:1271364-1271820	+	Intronic	YES	0.00478929	0.17595	0.391253	0.45952	0.942896	0.192844	0.30527	0.282267	0.999999	1	0.00054526	0.0265282	BOTH
XLOC_027021		4:949775-949919	-	Intronic	YES	0.00295714	0.287814	0.541748	0.779826	0.9787	0.00964287	0.0260233	0.524635	1	1	4.96607e-12	1.45009e-09	ETOH
XLOC_027065		4:1272492-1276624	-	Anti-Sense	YES	0.0186282	0.007398	0.0342268	0.10925	0.846224	0.0414644	0.0891535	0.791099	9.06683e-21	7.4587e-20	0.000152358	0.00905516	BOTH
XLOC_027082		U:192004-194181	+	Intronic	YES	0	1	1	0.0312737	0.771133	0.130071	0.224211	0.572468	5.65826e-06	1.33636e-05	2.95078e-05	0.00227264	BOTH
XLOC_027158		U:1442872-1442997	+	Intergenic	RARE	0	1	1	0.656183	0.965503	0.0475972	0.0999454	0.824992	0.999999	1	2.89474e-42	1.08006e-38	BASELINE
XLOC_027195		U:2119411-2180251	+	Intergenic	YES	0	1	1	0.197174	0.88363	0.284101	0.410301	0.757982	1.96308e-19	1.39751e-18	0.00118177	0.0486919	BOTH
XLOC_027198		U:2236763-2236941	+	Intergenic	RARE	-2.22045e-16	1	1	0.278946	0.90685	0.0181979	0.0450181	0.65978	2.41708e-10	7.98324e-10	4.84143e-05	0.00345905	BOTH
XLOC_027234		U:3560582-3561407	+	Intergenic	YES	0	1	1	0.535228	0.949726	0.695571	0.784483	0.7298	4.1764e-13	1.70613e-12	3.19545e-06	0.000330164	BOTH
XLOC_027419		U:8656900-8658274	+	Intergenic	YES	0	1	1	0.128157	0.855742	0.541367	0.658483	0.845203	6.22462e-16	3.18778e-15	1.84195e-13	6.79701e-11	BOTH
XLOC_027434		U:9237722-9238875	+	Intergenic	YES	0	1	1	0.239821	0.894982	0.259594	0.383451	0.845809	7.54568e-20	5.61454e-19	1.26155e-09	2.66433e-07	BOTH
XLOC_027593		U:2820966-2821232	-	Intergenic	RARE	-2.22045e-16	1	1	0.932429	0.99566	0.373766	0.502627	0.309293	1	1	0.000115392	0.00713602	BASELINE
XLOC_027655		U:4025673-4029911	-	Intergenic	YES	0	1	1	0.250169	0.896484	0.47954	0.603404	0.933382	2.88921e-35	1.07919e-33	7.9579e-11	1.93642e-08	BOTH
XLOC_027772		U:7459338-7459488	-	Intergenic	RARE	-2.22045e-16	1	1	0.955646	0.997891	7.68661e-05	0.000328398	0.361036	0.959107	1	1.24644e-05	0.00108715	BASELINE
XLOC_027774		U:7488587-7489934	-	Intergenic	RARE	-2.22045e-16	1	1	0.452212	0.940882	0.568788	0.682221	0.458346	0.0161466	0.0269163	3.56511e-05	0.00266629	BOTH
XLOC_027825		U:9237676-9464587	-	Intergenic	YES	0	1	1	0.204448	0.885985	0.00201116	0.00651852	0.887958	4.87193e-27	7.91865e-26	6.58808e-09	1.22225e-06	BOTH
XLOC_027835		U:9594271-9618295	-	Intergenic	YES	0	1	1	0.828922	0.983668	2.33978e-07	1.41406e-06	0.634483	3.05447e-05	6.7868e-05	1.37143e-08	2.39857e-06	BOTH
XLOC_027920		Uextra:693731-695063	+	Intergenic	YES	0	1	1	0.49902	0.946331	7.19003e-05	0.000308478	0.959102	2.82118e-45	2.92393e-43	9.03872e-11	2.168e-08	BOTH
XLOC_027935		Uextra:979075-1221282	+	Intergenic	YES	1.11022e-16	1	1	0.125103	0.85495	0.286689	0.412843	0.945766	2.53507e-47	3.22454e-45	3.21409e-05	0.00244184	BOTH
XLOC_027962		Uextra:1566536-1567649	+	Intergenic	YES	0	1	1	0.100267	0.84066	0.0326685	0.0734543	0.650058	8.75067e-11	2.98869e-10	0.000220055	0.0123676	BOTH
XLOC_027969		Uextra:1833699-1833824	+	Intergenic	RARE	-2.22045e-16	1	1	0.702687	0.970504	0.0101944	0.0273186	0.328903	0.965015	1	8.11323e-05	0.0053525	BASELINE
XLOC_028036		Uextra:4353206-4353753	+	Intergenic	RARE	-3.10862e-15	1	1	0.883428	0.991525	0.0828777	0.15678	0.704608	1.02723e-12	4.06964e-12	2.88972e-05	0.00223587	BOTH
XLOC_028063		Uextra:5812689-5813422	+	Intergenic	RARE	0	1	1	0.771589	0.977966	0.26407	0.388219	0.408213	0.0529704	0.0815901	0.000172501	0.010074	BASELINE
XLOC_028086		Uextra:7150438-7150572	+	Intergenic	RARE	-2.22045e-16	1	1	0.979853	0.999388	0.0995836	0.181549	0.830679	0.959006	1	7.93478e-43	3.33063e-39	BASELINE
XLOC_028130		Uextra:9403092-9575605	+	Intergenic	RARE	0	1	1	NA	NA	NA	NA	0.999902	1	1	0	0	BASELINE
XLOC_028140		Uextra:10963510-10964263	+	Intergenic	YES	0	1	1	0.35525	0.923371	1.32958e-05	6.36392e-05	0.934195	2.92914e-42	2.15231e-40	7.65046e-06	0.000700006	BOTH
XLOC_028179		Uextra:15561751-15562135	+	Intergenic	YES	-1.11022e-16	1	1	0.1347	0.855742	0.312104	0.439861	0.380964	0.999999	1	6.03804e-07	7.56558e-05	BOTH
XLOC_028251		Uextra:23507821-23507946	+	Intergenic	RARE	1.9984e-15	1	1	0.225936	0.894471	0.000122628	0.000506818	0.575211	0.999999	1	1.2871e-14	5.68697e-12	BASELINE
XLOC_028294		Uextra:27542955-27543340	+	Intergenic	RARE	1.11022e-16	1	1	0.258068	0.898696	0.277933	0.40351	0.289275	0.835005	0.977691	0.000896046	0.0389253	BOTH
XLOC_028330		Uextra:105158-142164	-	Intergenic	YES	0	1	1	0.242629	0.894987	0.00500223	0.0146119	0.867084	1.04791e-26	1.65284e-25	1.41486e-06	0.00015837	BOTH
XLOC_028344		Uextra:282061-282734	-	Intergenic	RARE	-1.11022e-16	1	1	0.490249	0.944258	0.249285	0.37174	0.290992	0.72594	0.868685	0.00113561	0.0472538	BOTH
XLOC_028510		Uextra:5171269-5171404	-	Intergenic	RARE	0	1	1	0.246298	0.894987	0.00416316	0.0124402	0.628567	0.999999	1	3.71084e-18	2.44333e-15	BASELINE
XLOC_028535		Uextra:6837052-6837183	-	Intergenic	RARE	0	1	1	0.0856073	0.831163	0.0422718	0.0905417	0.694625	0.999998	1	5.43528e-24	6.08389e-21	BASELINE
XLOC_028546		Uextra:7309128-7309237	-	Intergenic	RARE	6.66134e-16	1	1	0.271568	0.904136	1.65081e-05	7.79852e-05	0.571137	0.999999	1	2.39388e-14	1.04398e-11	BASELINE
XLOC_028549		Uextra:7434859-7434963	-	Intergenic	RARE	1.11022e-16	1	1	0.212199	0.888851	0.02128	0.0514522	0.327159	1	1	7.42554e-05	0.00494742	BASELINE
XLOC_028552		Uextra:7494338-7494473	-	Intergenic	RARE	-2.22045e-16	1	1	0.0298005	0.771133	0.0658325	0.130337	0.48268	1	1	3.37952e-10	7.61639e-08	BASELINE
XLOC_028602		Uextra:11675783-11675911	-	Intergenic	RARE	-3.33067e-15	1	1	0.61108	0.95985	0.014068	0.0360363	0.65635	0.969695	1	3.40312e-20	2.72087e-17	BASELINE
XLOC_028604		Uextra:11909947-11910071	-	Intergenic	RARE	2.22045e-16	1	1	0.0833973	0.830382	0.0120887	0.0316445	0.77666	0.999999	1	6.93033e-34	1.79016e-30	BASELINE
XLOC_028645		Uextra:16107909-16108040	-	Intergenic	RARE	0	1	1	0.971827	0.998989	0.00798975	0.0220672	0.415789	0.959031	1	2.80263e-07	3.71985e-05	BASELINE
XLOC_028789		X:25824-27313	+	Intronic	YES	0.0132088	0.0243049	0.089747	0.104556	0.842449	0.0284088	0.0654367	0.52313	1.74917e-05	3.96071e-05	0.000363722	0.0188484	BASELINE
XLOC_028832		X:610146-612296	+	Intronic	YES	0.00326114	0.264287	0.511938	0.417188	0.935077	0.578781	0.690628	0.416364	0.617692	0.754944	1.1576e-06	0.000132669	BOTH
XLOC_028991		X:2658413-2660921	+	Intronic	YES	0.00434862	0.19725	0.421567	0.526708	0.948062	0.0564727	0.11498	0.471036	0.0070635	0.012366	4.11047e-05	0.00300718	BOTH
XLOC_029012		X:2766013-2772715	+	Anti-Sense	RARE	0.0136324	0.0221171	0.0834113	0.751616	0.977119	8.59796e-05	0.000364412	0.486362	0.00011682	0.00024678	0.000739945	0.0335775	BOTH
XLOC_029097		X:3912564-3912927	+	Intergenic	YES	0.000958256	0.54533	0.796909	0.463854	0.943323	0.55649	0.671863	0.624276	2.6218e-07	6.87706e-07	5.20825e-06	0.000499695	BOTH
XLOC_029107		X:3941336-3941698	+	Anti-Sense	RARE	0.00631718	0.119975	0.29929	0.364703	0.925635	0.128261	0.221775	0.560077	4.86734e-06	1.15525e-05	8.44004e-05	0.00552469	BOTH
XLOC_029170		X:4630923-4640119	+	Intergenic	YES	0.0212176	0.00423165	0.0214456	0.781885	0.9787	7.30399e-08	4.7002e-07	0.797071	6.56373e-09	1.94554e-08	3.4657e-16	1.87707e-13	BOTH
XLOC_029390		X:6203522-6207028	+	Intronic	RARE	0.000352991	0.713618	0.925789	0.179015	0.877312	0.720092	0.804303	0.343525	0.259121	0.349393	0.00059144	0.027894	BOTH
XLOC_029485		X:7783296-7786042	+	Anti-Sense	YES	0.0321747	0.0004121	0.00290721	0.978325	0.999388	0.86976	0.913557	0.747596	1.24844e-17	7.46217e-17	0.00037449	0.019317	BOTH
XLOC_029753		X:10798312-10798799	+	Intergenic	RARE	0.0138876	0.0208984	0.0797235	0.955999	0.997891	0.781957	0.851394	0.621837	0.00151842	0.00286693	3.16519e-10	7.18157e-08	BOTH
XLOC_029805		X:11410681-11411591	+	Intronic	YES	0.000891646	0.559647	0.80917	0.41	0.933709	0.332168	0.460723	0.339592	0.456937	0.57976	0.000272938	0.0147589	ETOH
XLOC_030059		X:13912660-13913112	+	Intergenic	RARE	0.00130625	0.48009	0.7421	0.835995	0.984416	0.811021	0.872481	0.498928	4.85823e-05	0.000106231	0.00070893	0.0324331	BOTH
XLOC_030588		X:19352875-19355488	+	Intronic	YES	0.000621862	0.626153	0.86173	0.0360225	0.771133	0.00740733	0.0206802	0.372175	0.288392	0.384966	0.000108983	0.0068023	ETOH
XLOC_030652		X:20180852-20182739	+	Anti-Sense	RARE	0.00698392	0.102017	0.266222	0.652766	0.965029	0.666911	0.761275	0.650586	2.20697e-08	6.28212e-08	3.49184e-06	0.000354248	BOTH
XLOC_030950		X:2428470-2429690	-	Intronic	YES	0.0113791	0.036662	0.123383	0.892899	0.9921	0.0307217	0.0697752	0.364059	0.185701	0.258362	0.000344777	0.0179498	BOTH
XLOC_030961		X:2511415-2511543	-	Intergenic	RARE	0.00019192	0.786698	0.974306	0.908865	0.994505	0.0257068	0.0602212	0.380692	0.961727	1	3.44844e-06	0.000350905	BASELINE
XLOC_031434		X:8313648-8315314	-	Intronic	YES	0.000195792	0.78461	0.972952	0.83029	0.983952	0.0194977	0.0477411	0.37572	0.297254	0.39568	8.43867e-05	0.00552469	BOTH
XLOC_031447		X:8457193-8459806	-	Anti-Sense	YES	0.00366056	0.23688	0.477342	0.244139	0.894987	0.529106	0.647587	0.676066	5.72858e-13	2.31598e-12	0.000571671	0.0273911	BOTH
XLOC_031865		X:12512969-12513561	-	Intronic	RARE	0.0046575	0.182028	0.400032	0.471156	0.943323	0.0549521	0.112477	0.776826	0.00079116	0.00154236	1.48739e-22	1.51354e-19	BOTH
XLOC_031878		X:12632361-12632799	-	Intronic	YES	0.0217828	0.00374803	0.0193601	0.855493	0.987155	0.306248	0.433483	0.389404	0.371633	0.482875	2.42365e-05	0.00194239	ETOH
XLOC_032128		X:15298310-15299090	-	Intronic	YES	0.000153397	0.808842	0.988628	0.201797	0.883851	0.218261	0.336183	0.419234	0.0991964	0.145618	3.75697e-05	0.00278497	ETOH
XLOC_032170		X:15744757-15745111	-	Intronic	YES	0.0243191	0.00217882	0.0122206	0.986817	0.999388	3.66374e-15	5.22289e-14	0.401782	0.171354	0.240004	4.66426e-05	0.00335387	BOTH
XLOC_032549		X:19419735-19420728	-	Anti-Sense	YES	0.00803758	0.0793224	0.22061	0.196595	0.88363	1.01166e-11	9.93662e-11	0.436865	1	1	2.20134e-09	4.56301e-07	BASELINE
XLOC_032652		X:20796904-20797490	-	Intronic	YES	0.000267199	0.749502	0.950499	0.956315	0.997891	0.0186222	0.0459288	0.299881	0.683841	0.82439	0.000856849	0.0376117	BOTH
XLOC_032789		XHet:10266-11282	+	Intronic	YES	0	1	1	0.229859	0.894606	0.000159371	0.000645248	0.263178	1	1	0.00046747	0.0233249	ETOH

## Sheet: C. LxT Genes
LxT Both Sexes FlyBase Gene ID	LxT Both Sexes Gene Symbol		LxT Females FlyBase Gene ID	LxT Females Gene Symbol		LxT Males FlyBase Gene ID	LxT Males Gene Symbol
FBgn0033246	ACC		FBgn0000427	dec-1		FBgn0034153	Acp53C14b
FBgn0020508	Ag5r2		FBgn0087012	5-HT2A		FBgn0015010	Ag5r
FBgn0016123	Alp4		FBgn0032839	AANATL3		FBgn0039378	alpha4GT2
FBgn0015568	alpha-Est1		FBgn0031170	ABCA		FBgn0015574	alpha-Est6
FBgn0015575	alpha-Est7		FBgn0023416	Ac3		FBgn0263492	asRNA:CR43481
FBgn0000078	Amy-d		FBgn0000042	Act5C		FBgn0265070	asRNA:CR44181
FBgn0033366	Ance-4		FBgn0027932	Akap200		FBgn0265314	asRNA:CR44287
FBgn0033926	Arc1		FBgn0025595	AkhR		FBgn0265510	asRNA:CR44372
FBgn0020762	Atet		FBgn0000061	al		FBgn0265613	asRNA:CR44431
FBgn0037989	ATP8B		FBgn0015569	alpha-Est10		FBgn0265702	asRNA:CR44509
FBgn0031571	bark		FBgn0015570	alpha-Est2		FBgn0265811	asRNA:CR44600
FBgn0028482	bdl		FBgn0000079	Amy-p		FBgn0265864	asRNA:CR44653
FBgn0036449	bmm		FBgn0020506	Amyrel		FBgn0265914	asRNA:CR44703
FBgn0027844	CAH1		FBgn0004569	aos		FBgn0266143	asRNA:CR44849
FBgn0000277	CecA2		FBgn0000099	ap		FBgn0266324	asRNA:CR44989
FBgn0039091	CG10182		FBgn0065032	Arpc3B		FBgn0266702	asRNA:CR45192
FBgn0039312	CG10514		FBgn0000120	Arr1		FBgn0266819	asRNA:CR45281
FBgn0035619	CG10592		FBgn0000121	Arr2		FBgn0267035	asRNA:CR45479
FBgn0046302	CG10650		FBgn0265295	asRNA:CR42871		FBgn0267164	asRNA:CR45604
FBgn0034289	CG10910		FBgn0265901	asRNA:CR44690		FBgn0267246	asRNA:CR45686
FBgn0034295	CG10911		FBgn0031453	Bacc		FBgn0260945	Atg1
FBgn0034296	CG10912		FBgn0037205	BoYb		FBgn0036995	atk
FBgn0034356	CG10924		FBgn0031150	bves		FBgn0020236	ATPCL
FBgn0036320	CG10943		FBgn0036715	Cad74A		FBgn0012042	AttA
FBgn0037562	CG11671		FBgn0039722	Capa		FBgn0041581	AttB
FBgn0039310	CG11878		FBgn0011571	caz		FBgn0041579	AttC
FBgn0039313	CG11892		FBgn0039396	CCAP-R		FBgn0038530	AttD
FBgn0031248	CG11912		FBgn0052183	Ccn		FBgn0032049	Bace
FBgn0030098	CG12057		FBgn0034197	Cda9		FBgn0052594	be
FBgn0039419	CG12290		FBgn0039774	CDase		FBgn0250831	BG642167
FBgn0033774	CG12374		FBgn0038865	cDIP		FBgn0050362	boly
FBgn0033301	CG12780		FBgn0000279	CecC		FBgn0027843	CAH2
FBgn0035933	CG13309		FBgn0032785	CG10026		FBgn0013995	Calx
FBgn0033788	CG13323		FBgn0034440	CG10073		FBgn0038147	CCHa2
FBgn0033789	CG13324		FBgn0035695	CG10226		FBgn0034443	cer
FBgn0034723	CG13506		FBgn0039108	CG10232		FBgn0036369	CG10089
FBgn0039203	CG13618		FBgn0027562	CG10345		FBgn0039109	CG10365
FBgn0031034	CG14205		FBgn0037531	CG10445		FBgn0032699	CG10383
FBgn0031033	CG14219		FBgn0035661	CG10477		FBgn0034221	CG10764
FBgn0034293	CG14495		FBgn0039311	CG10513		FBgn0039241	CG11089
FBgn0034318	CG14500		FBgn0003057	CG10598		FBgn0033067	CG11211
FBgn0014903	CG14630		FBgn0032726	CG10621		FBgn0037115	CG11249
FBgn0033250	CG14762		FBgn0036289	CG10657		FBgn0039818	CG11318
FBgn0035409	CG14963		FBgn0032836	CG10680		FBgn0040364	CG11378
FBgn0030929	CG15043		FBgn0033821	CG10799		FBgn0036836	CG11619
FBgn0030270	CG15199		FBgn0027552	CG10863		FBgn0029856	CG11700
FBgn0028950	CG15255		FBgn0037228	CG1092		FBgn0039629	CG11842
FBgn0039768	CG15533		FBgn0039930	CG11077		FBgn0031249	CG11911
FBgn0031910	CG15818		FBgn0037204	CG11131		FBgn0034436	CG11961
FBgn0035743	CG15829		FBgn0034507	CG11192		FBgn0034900	CG12491
FBgn0015336	CG15865		FBgn0029568	CG11381		FBgn0036324	CG12520
FBgn0031558	CG16704		FBgn0035484	CG11594		FBgn0033521	CG12896
FBgn0038719	CG16727		FBgn0033538	CG11883		FBgn0037065	CG12974
FBgn0030482	CG1673		FBgn0031636	CG12194		FBgn0036610	CG13058
FBgn0034480	CG16898		FBgn0030596	CG12398		FBgn0033680	CG13186
FBgn0040732	CG16926		FBgn0035171	CG12502		FBgn0035611	CG13285
FBgn0032387	CG16965		FBgn0030439	CG12716		FBgn0033787	CG13321
FBgn0033443	CG1698		FBgn0030847	CG12991		FBgn0034662	CG13492
FBgn0035355	CG16985		FBgn0036563	CG13075		FBgn0034942	CG13566
FBgn0031412	CG16995		FBgn0032809	CG13078		FBgn0035176	CG13905
FBgn0032297	CG17124		FBgn0032088	CG13102		FBgn0036835	CG14075
FBgn0031490	CG17264		FBgn0033792	CG13325		FBgn0036321	CG14120
FBgn0038481	CG17475		FBgn0035097	CG13405		FBgn0031037	CG14207
FBgn0032144	CG17633		FBgn0036419	CG13482		FBgn0032966	CG1421
FBgn0025837	CG17636		FBgn0034928	CG13562		FBgn0031065	CG14234
FBgn0038718	CG17752		FBgn0040600	CG13631		FBgn0039452	CG14245
FBgn0034512	CG18067		FBgn0039277	CG13650		FBgn0029895	CG14441
FBgn0036024	CG18180		FBgn0035582	CG13705		FBgn0027578	CG14526
FBgn0039761	CG18404		FBgn0031937	CG13795		FBgn0034390	CG15093
FBgn0033216	CG1946		FBgn0035323	CG13807		FBgn0040730	CG15127
FBgn0260474	CG30002		FBgn0035313	CG13810		FBgn0029986	CG15332
FBgn0050043	CG30043		FBgn0035158	CG13895		FBgn0030040	CG15347
FBgn0050281	CG30281		FBgn0040949	CG13998		FBgn0039827	CG1544
FBgn0050463	CG30463		FBgn0036359	CG14105		FBgn0039817	CG15553
FBgn0036015	CG3088		FBgn0040393	CG14265		FBgn0030665	CG15646
FBgn0051041	CG31041		FBgn0030038	CG1440		FBgn0036767	CG16775
FBgn0051087	CG31087		FBgn0032896	CG14400		FBgn0029661	CG16781
FBgn0051091	CG31091		FBgn0034317	CG14499		FBgn0039972	CG17018
FBgn0051106	CG31106		FBgn0039611	CG14528		FBgn0039941	CG17167
FBgn0051343	CG31343		FBgn0037485	CG14606		FBgn0038828	CG17270
FBgn0051446	CG31446		FBgn0030157	CG1468		FBgn0038505	CG17283
FBgn0052107	CG32107		FBgn0038238	CG14854		FBgn0032772	CG17350
FBgn0034712	CG3264		FBgn0030938	CG15047		FBgn0032775	CG17544
FBgn0052750	CG32750		FBgn0040734	CG15065		FBgn0038450	CG17560
FBgn0034711	CG3290		FBgn0040850	CG15210		FBgn0038449	CG17562
FBgn0053258	CG33258		FBgn0028526	CG15293		FBgn0260000	CG17570
FBgn0031514	CG3332		FBgn0039769	CG15534		FBgn0038416	CG17930
FBgn0053346	CG33346		FBgn0029697	CG15570		FBgn0036837	CG18135
FBgn0053926	CG33926		FBgn0031632	CG15628		FBgn0035780	CG18417
FBgn0053978	CG33978		FBgn0038832	CG15695		FBgn0028518	CG18480
FBgn0085195	CG34166		FBgn0035569	CG15876		FBgn0034279	CG18635
FBgn0085227	CG34198		FBgn0033446	CG1648		FBgn0033205	CG2064
FBgn0085313	CG34284		FBgn0030816	CG16700		FBgn0030005	CG2120
FBgn0085320	CG34291		FBgn0035348	CG16758		FBgn0030396	CG2556
FBgn0027571	CG3523		FBgn0035356	CG16986		FBgn0031646	CG2837
FBgn0036422	CG3868		FBgn0036550	CG17026		FBgn0050046	CG30046
FBgn0038292	CG3987		FBgn0032285	CG17108		FBgn0050289	CG30289
FBgn0250757	CG42235		FBgn0039051	CG17109		FBgn0050429	CG30429
FBgn0259748	CG42397		FBgn0039485	CG17189		FBgn0051198	CG31198
FBgn0260396	CG42521		FBgn0039472	CG17192		FBgn0051233	CG31233
FBgn0034741	CG4269		FBgn0032414	CG17211		FBgn0051267	CG31267
FBgn0261802	CG42748		FBgn0031489	CG17224		FBgn0051300	CG31300
FBgn0261989	CG42807		FBgn0027070	CG17322		FBgn0051323	CG31323
FBgn0262003	CG42821		FBgn0038717	CG17751		FBgn0051522	CG31522
FBgn0262007	CG42825		FBgn0028480	CG17841		FBgn0051792	CG31792
FBgn0262679	CG43149		FBgn0038919	CG17843		FBgn0051810	CG31810
FBgn0038313	CG4338		FBgn0061356	CG18003		FBgn0052054	CG32054
FBgn0263748	CG43673		FBgn0036873	CG18294		FBgn0052073	CG32073
FBgn0034664	CG4377		FBgn0033904	CG18327		FBgn0052284	CG32284
FBgn0264296	CG43774		FBgn0033458	CG18446		FBgn0052720	CG32720
FBgn0264502	CG43901		FBgn0038701	CG18493		FBgn0053017	CG33017
FBgn0264750	CG44008		FBgn0031929	CG18585		FBgn0053054	CG33054
FBgn0264775	CG44013		FBgn0036469	CG18649		FBgn0053137	CG33137
FBgn0264776	CG44014		FBgn0042175	CG18858		FBgn0053143	CG33143
FBgn0264907	CG44098		FBgn0039911	CG1909		FBgn0053282	CG33282
FBgn0265185	CG44250		FBgn0026563	CG1979		FBgn0053965	CG33965
FBgn0265186	CG44251		FBgn0029990	CG2233		FBgn0085223	CG34194
FBgn0033826	CG4734		FBgn0033484	CG2269		FBgn0085261	CG34232
FBgn0027584	CG4757		FBgn0050334	CG30334		FBgn0085384	CG34355
FBgn0038756	CG4783		FBgn0029608	CG3091		FBgn0085413	CG34384
FBgn0037996	CG4830		FBgn0051030	CG31030		FBgn0085415	CG34386
FBgn0035620	CG5150		FBgn0051077	CG31077		FBgn0031559	CG3513
FBgn0038484	CG5246		FBgn0051205	CG31205		FBgn0036824	CG3902
FBgn0038353	CG5399		FBgn0051380	CG31380		FBgn0037801	CG3999
FBgn0036766	CG5506		FBgn0051463	CG31463		FBgn0058198	CG40198
FBgn0034160	CG5550		FBgn0051663	CG31663		FBgn0034659	CG4021
FBgn0034292	CG5767		FBgn0051769	CG31769		FBgn0084001	CG41434
FBgn0034291	CG5770		FBgn0051869	CG31869		FBgn0031251	CG4213
FBgn0040582	CG5791		FBgn0051955	CG31955		FBgn0259227	CG42327
FBgn0038083	CG5999		FBgn0029887	CG3198		FBgn0259237	CG42335
FBgn0039475	CG6277		FBgn0052267	CG32267		FBgn0260658	CG42541
FBgn0039474	CG6283		FBgn0043783	CG32444		FBgn0261801	CG42747
FBgn0039471	CG6295		FBgn0052483	CG32483		FBgn0261853	CG42782
FBgn0039453	CG6403		FBgn0052581	CG32581		FBgn0031258	CG4297
FBgn0032400	CG6770		FBgn0052645	CG32645		FBgn0030747	CG4301
FBgn0036262	CG6910		FBgn0053155	CG33155		FBgn0027073	CG4302
FBgn0031970	CG7227		FBgn0053229	CG33229		FBgn0262580	CG43120
FBgn0036948	CG7298		FBgn0053301	CG33301		FBgn0262962	CG43273
FBgn0038098	CG7381		FBgn0053306	CG33306		FBgn0263321	CG43402
FBgn0036738	CG7542		FBgn0053307	CG33307		FBgn0263842	CG43703
FBgn0028945	CG7631		FBgn0035154	CG3344		FBgn0264081	CG43750
FBgn0039703	CG7829		FBgn0053494	CG33494		FBgn0264295	CG43773
FBgn0028532	CG7968		FBgn0034997	CG3376		FBgn0039073	CG4408
FBgn0037684	CG8129		FBgn0034999	CG3394		FBgn0039064	CG4467
FBgn0030863	CG8188		FBgn0053966	CG33966		FBgn0038740	CG4562
FBgn0040502	CG8343		FBgn0054054	CG34054		FBgn0030776	CG4653
FBgn0032002	CG8353		FBgn0036008	CG3408		FBgn0034275	CG5002
FBgn0035781	CG8560		FBgn0083972	CG34136		FBgn0037897	CG5270
FBgn0035779	CG8562		FBgn0085237	CG34208		FBgn0039521	CG5402
FBgn0250836	CG8628		FBgn0085244	CG34215		FBgn0038846	CG5697
FBgn0030837	CG8661		FBgn0085256	CG34227		FBgn0038873	CG5892
FBgn0033271	CG8708		FBgn0085265	CG34236		FBgn0029835	CG5921
FBgn0036381	CG8745		FBgn0085297	CG34268		FBgn0029836	CG5928
FBgn0033760	CG8785		FBgn0085330	CG34301		FBgn0033865	CG6220
FBgn0033733	CG8834		FBgn0038463	CG3534		FBgn0039470	CG6296
FBgn0033698	CG8858		FBgn0031417	CG3597		FBgn0033873	CG6337
FBgn0032923	CG9248		FBgn0031562	CG3604		FBgn0033875	CG6357
FBgn0035094	CG9380		FBgn0038702	CG3739		FBgn0032428	CG6405
FBgn0036875	CG9449		FBgn0032131	CG3841		FBgn0025827	CG6421
FBgn0036876	CG9451		FBgn0029866	CG3842		FBgn0034187	CG6967
FBgn0031805	CG9505		FBgn0036821	CG3961		FBgn0036489	CG7011
FBgn0030777	CG9672		FBgn0038469	CG4009		FBgn0032283	CG7296
FBgn0030773	CG9676		FBgn0011824	CG4038		FBgn0038638	CG7702
FBgn0039760	CG9682		FBgn0263830	CG40486		FBgn0038652	CG7720
FBgn0039756	CG9743		FBgn0259239	CG42337		FBgn0033615	CG7741
FBgn0037635	CG9837		FBgn0259821	CG42402		FBgn0037612	CG8112
FBgn0022702	Cht2		FBgn0259823	CG42404		FBgn0036022	CG8329
FBgn0000370	crc		FBgn0260657	CG42540		FBgn0040532	CG8369
FBgn0005664	Crys		FBgn0264979	CG4267		FBgn0033915	CG8485
FBgn0062412	Ctr1B		FBgn0261611	CG42700		FBgn0032945	CG8665
FBgn0039858	CycG		FBgn0261616	CG42705		FBgn0038136	CG8774
FBgn0015035	Cyp4e3		FBgn0261848	CG42780		FBgn0033582	CG9084
FBgn0033395	Cyp4p2		FBgn0261999	CG42817		FBgn0035206	CG9186
FBgn0030615	Cyp4s3		FBgn0262357	CG43055		FBgn0032514	CG9302
FBgn0015714	Cyp6a17		FBgn0262531	CG43085		FBgn0030332	CG9360
FBgn0000473	Cyp6a2		FBgn0262572	CG43112		FBgn0032507	CG9377
FBgn0033978	Cyp6a23		FBgn0262816	CG43187		FBgn0032506	CG9395
FBgn0013772	Cyp6a8		FBgn0030456	CG4332		FBgn0032087	CG9568
FBgn0033065	Cyp6w1		FBgn0263038	CG43333		FBgn0030775	CG9673
FBgn0033659	Damm		FBgn0263080	CG43348		FBgn0039784	CG9698
FBgn0031461	daw		FBgn0263081	CG43349		FBgn0038209	CG9722
FBgn0024806	DIP2		FBgn0034663	CG4363		FBgn0034784	CG9826
FBgn0037443	Dmtn		FBgn0264488	CG43896		FBgn0030757	CG9902
FBgn0004240	DptA		FBgn0264489	CG43897		FBgn0031317	Charon
FBgn0038071	Dtg		FBgn0035982	CG4461		FBgn0023395	Chd3
FBgn0000557	eEF1alpha2		FBgn0038752	CG4462		FBgn0022700	Cht4
FBgn0011554	etaTry		FBgn0266354	CG45002		FBgn0034582	Cht9
FBgn0037724	Fst		FBgn0035006	CG4563		FBgn0041160	comm2
FBgn0051148	Gba1a		FBgn0031306	CG4577		FBgn0035875	Cpr66Cb
FBgn0261703	gce		FBgn0029935	CG4615		FBgn0036619	Cpr72Ec
FBgn0001114	Glt		FBgn0035040	CG4741		FBgn0262532	CR43086
FBgn0038074	Gnmt		FBgn0031220	CG4822		FBgn0265541	CR44391
FBgn0010038	GstD2		FBgn0032219	CG4995		FBgn0000395	cv-2
FBgn0038020	GstD9		FBgn0032235	CG5096		FBgn0259938	cwo
FBgn0025583	IM2		FBgn0039342	CG5107		FBgn0033524	Cyp49a1
FBgn0040736	IM3		FBgn0038354	CG5404		FBgn0014469	Cyp4e2
FBgn0035227	Iml1		FBgn0039430	CG5455		FBgn0015037	Cyp4p1
FBgn0020906	Jon25Bi		FBgn0035293	CG5687		FBgn0033980	Cyp6a20
FBgn0031653	Jon25Biii		FBgn0026570	CG5704		FBgn0033775	Cyp9h1
FBgn0035667	Jon65Ai		FBgn0038930	CG5778		FBgn0010497	dmGlut
FBgn0035666	Jon65Aii		FBgn0029834	CG5937		FBgn0030607	dob
FBgn0039778	Jon99Fi		FBgn0029831	CG5966		FBgn0067783	DPCoAC
FBgn0043470	lambdaTry		FBgn0030647	CG6324		FBgn0034407	DptB
FBgn0040099	lectin-28C		FBgn0036104	CG6418		FBgn0010388	Dro
FBgn0053532	lectin-37Da		FBgn0040606	CG6503		FBgn0010381	Drs
FBgn0053533	lectin-37Db		FBgn0030887	CG6867		FBgn0000504	dsx
FBgn0025692	Lfg		FBgn0032652	CG6870		FBgn0262734	eIF4H1
FBgn0032253	LManI		FBgn0034191	CG6984		FBgn0000594	Est-P
FBgn0032066	LManIII		FBgn0031930	CG7025		FBgn0050502	fa2h
FBgn0032068	LManV		FBgn0031968	CG7231		FBgn0023550	FarO
FBgn0032069	LManVI		FBgn0036229	CG7248		FBgn0004509	Fur1
FBgn0262825	lncRNA:CR43196		FBgn0032286	CG7300		FBgn0036428	Gbs-70E
FBgn0266095	lncRNA:CR44832		FBgn0030976	CG7378		FBgn0027341	Gfat1
FBgn0001234	lncRNA:Hsromega		FBgn0038631	CG7695		FBgn0039099	GILT2
FBgn0034540	Lrt		FBgn0038641	CG7708		FBgn0034511	GNBP-like3
FBgn0002565	Lsp2		FBgn0033047	CG7882		FBgn0063497	GstE3
FBgn0004427	LysD		FBgn0028534	CG7916		FBgn0029167	Hml
FBgn0036996	mag		FBgn0028533	CG7953		FBgn0062928	hpRNA:CR33940
FBgn0033294	Mal-A4		FBgn0038115	CG7966		FBgn0259682	Jabba
FBgn0032381	Mal-B1		FBgn0033999	CG8093		FBgn0027654	jdp
FBgn0002645	Map205		FBgn0034030	CG8192		FBgn0010052	Jhe
FBgn0010241	Mdr50		FBgn0035703	CG8270		FBgn0031654	Jon25Bii
FBgn0011661	Moe		FBgn0034052	CG8299		FBgn0035665	Jon65Aiii
FBgn0014865	Mtk		FBgn0034143	CG8303		FBgn0035886	Jon66Ci
FBgn0038790	MtnC		FBgn0030852	CG8316		FBgn0043471	kappaTry
FBgn0053265	Muc68E		FBgn0035791	CG8539		FBgn0063923	Kaz1-ORFB
FBgn0051901	Mur29B		FBgn0034479	CG8654		FBgn0033494	KCNQ
FBgn0264272	mwh		FBgn0030707	CG8916		FBgn0040107	lectin-21Ca
FBgn0010246	Myo61F		FBgn0033674	CG8964		FBgn0016675	Lectin-galC1
FBgn0015773	NetA		FBgn0028920	CG8997		FBgn0051526	lncRNA:CR31526
FBgn0002939	ninaD		FBgn0031752	CG9044		FBgn0030356	lncRNA:CR32661
FBgn0051619	nolo		FBgn0032913	CG9259		FBgn0262967	lncRNA:CR43278
FBgn0261675	Npc1b		FBgn0034564	CG9344		FBgn0262969	lncRNA:CR43280
FBgn0051410	Npc2e		FBgn0032076	CG9510		FBgn0263089	lncRNA:CR43357
FBgn0039154	Npc2f		FBgn0029939	CG9650		FBgn0263328	lncRNA:CR43409
FBgn0262509	nrm		FBgn0031515	CG9664		FBgn0263330	lncRNA:CR43411
FBgn0034471	Obp56e		FBgn0039787	CG9702		FBgn0263337	lncRNA:CR43418
FBgn0039685	Obp99b		FBgn0038143	CG9813		FBgn0263506	lncRNA:CR43495
FBgn0013307	Odc1		FBgn0039591	CG9988		FBgn0263624	lncRNA:CR43633
FBgn0040959	Peritrophin-15a		FBgn0034553	CG9993		FBgn0263843	lncRNA:CR43704
FBgn0011822	Pgcl		FBgn0261290	CheA84a		FBgn0264367	lncRNA:CR43819
FBgn0037906	PGRP-LB		FBgn0250907	Cht10		FBgn0264474	lncRNA:CR43882
FBgn0035976	PGRP-LC		FBgn0004859	ci		FBgn0264515	lncRNA:CR43914
FBgn0035977	PGRP-LF		FBgn0026084	cib		FBgn0264518	lncRNA:CR43917
FBgn0043575	PGRP-SC2		FBgn0035533	Cip4		FBgn0264727	lncRNA:CR43995
FBgn0035806	PGRP-SD		FBgn0261612	CngA		FBgn0265449	lncRNA:CR44349
FBgn0043791	phu		FBgn0035282	CNMa		FBgn0265586	lncRNA:CR44413
FBgn0023479	teq		FBgn0000346	comt		FBgn0265592	lncRNA:CR44419
FBgn0014396	tim		FBgn0034499	Cpr56F		FBgn0265922	lncRNA:CR44711
FBgn0015316	Try29F		FBgn0035985	Cpr67B		FBgn0265938	lncRNA:CR44725
FBgn0022355	Tsf1		FBgn0036109	Cpr67Fa2		FBgn0266358	lncRNA:CR45006
FBgn0040069	vanin-like		FBgn0039307	CR13656		FBgn0266694	lncRNA:CR45184
FBgn0038613	Vha100-4		FBgn0046776	CR14033		FBgn0266698	lncRNA:CR45188
			FBgn0085644	CR41423		FBgn0266738	lncRNA:CR45211
			FBgn0263834	CR43696		FBgn0266800	lncRNA:CR45262
			FBgn0264910	CR44101		FBgn0266824	lncRNA:CR45286
			FBgn0031689	Cyp28d1		FBgn0266834	lncRNA:CR45296
			FBgn0031432	Cyp309a1		FBgn0266961	lncRNA:CR45412
			FBgn0031693	Cyp4ac1		FBgn0266968	lncRNA:CR45419
			FBgn0031695	Cyp4ac3		FBgn0266983	lncRNA:CR45434
			FBgn0033292	Cyp4ad1		FBgn0267121	lncRNA:CR45561
			FBgn0005670	Cyp4d1		FBgn0267154	lncRNA:CR45594
			FBgn0023541	Cyp4d14		FBgn0267190	lncRNA:CR45630
			FBgn0039519	Cyp6a18		FBgn0267317	lncRNA:CR45753
			FBgn0033981	Cyp6a21		FBgn0267562	lncRNA:CR45902
			FBgn0010385	Def		FBgn0267681	lncRNA:CR46017
			FBgn0086898	dgo		FBgn0267687	lncRNA:CR46023
			FBgn0000449	dib		FBgn0267692	lncRNA:CR46028
			FBgn0085358	Diedel3		FBgn0267694	lncRNA:CR46030
			FBgn0000157	Dll		FBgn0267923	lncRNA:CR46204
			FBgn0037580	DppIII		FBgn0267986	lncRNA:CR46253
			FBgn0030723	dpr18		FBgn0051092	LpR2
			FBgn0038282	dpr9		FBgn0002564	Lsp1gamma
			FBgn0052274	Drsl1		FBgn0034140	Lst
			FBgn0052282	Drsl4		FBgn0004425	LysB
			FBgn0035434	Drsl5		FBgn0004431	LysX
			FBgn0035290	dsb		FBgn0032382	Mal-B2
			FBgn0000527	e		FBgn0030993	Mec2
			FBgn0026438	Eaat2		FBgn0027592	MED15
			FBgn0037762	eloF		FBgn0051004	mesh
			FBgn0013953	Esp		FBgn0004228	mex1
			FBgn0040001	FASN3		FBgn0010651	MFS14
			FBgn0266084	Fhos		FBgn0014342	mia
			FBgn0038914	fit		FBgn0039250	Mink
			FBgn0036862	Gbs-76A		FBgn0033438	Mmp2
			FBgn0262869	Gfrl		FBgn0004174	Mst84Dc
			FBgn0267252	Ggamma30A		FBgn0051720	mthl15
			FBgn0039098	GILT3		FBgn0035623	mthl2
			FBgn0024963	GluClalpha		FBgn0052475	mthl8
			FBgn0028422	GluRIID		FBgn0002869	MtnB
			FBgn0264574	Glut1		FBgn0053192	MtnD
			FBgn0004919	gol		FBgn0034294	Muc55B
			FBgn0085423	GramD1B		FBgn0036181	Muc68Ca
			FBgn0015946	grim		FBgn0265988	mv
			FBgn0010041	GstD5		FBgn0038818	Nep4
			FBgn0063495	GstE5		FBgn0265416	Neto
			FBgn0063493	GstE7		FBgn0027929	NimB1
			FBgn0030484	GstT4		FBgn0010222	Nmdmc
			FBgn0010114	hig		FBgn0037782	Npc2d
			FBgn0260484	HIP		FBgn0034740	nsr
			FBgn0028519	hll		FBgn0032680	Ntf-2r
			FBgn0001218	Hsc70-3		FBgn0085424	nub
			FBgn0038233	HtrA2		FBgn0002973	numb
			FBgn0020415	Idgf2		FBgn0032433	Oatp33Ea
			FBgn0044050	Ilp3		FBgn0032435	Oatp33Eb
			FBgn0040653	IM4		FBgn0034715	Oatp58Db
			FBgn0004784	inaC		FBgn0038168	omd
			FBgn0086359	Invadolysin		FBgn0037419	Osi12
			FBgn0015001	iotaTry		FBgn0004394	pdm2
			FBgn0029966	Ir7c		FBgn0038973	Pebp1
			FBgn0038465	Irc		FBgn0040958	Peritrophin-15b
			FBgn0032706	Irk3		FBgn0031969	pes
			FBgn0010395	Itgbn		FBgn0043578	PGRP-SB1
			FBgn0033958	jef		FBgn0264953	Piezo
			FBgn0027339	jim		FBgn0034647	pirk
			FBgn0023197	Jon74E		FBgn0028410	Pk34A
			FBgn0003358	Jon99Ci		FBgn0041195	Pkd2
			FBgn0003357	Jon99Ciii		FBgn0003134	Pp1alpha-96A
			FBgn0039777	Jon99Fii		FBgn0261399	Pp1-Y1
			FBgn0263973	jv		FBgn0014011	Rac2
			FBgn0015399	kek1		FBgn0014018	Rel
			FBgn0028369	kirre		FBgn0264753	Rgk1
			FBgn0266450	Kr-h1		FBgn0085419	Rgk2
			FBgn0038839	Ktl		FBgn0003248	Rh2
			FBgn0010877	l(3)05822		FBgn0028699	Rh50
			FBgn0016031	lama		FBgn0002842	sa
			FBgn0262976	lawc		FBgn0039872	salt
			FBgn0001258	Ldh		FBgn0003328	scb
			FBgn0032264	Lip4		FBgn0039593	Sid
			FBgn0034381	List		FBgn0259213	side-II
			FBgn0033593	Listericin		FBgn0019890	Smg5
			FBgn0027611	LManII		FBgn0041184	Socs36E
			FBgn0051781	lncRNA:CR31781		FBgn0030774	spheroide
			FBgn0058469	lncRNA:CR40469		FBgn0038299	Spn88Eb
			FBgn0262993	lncRNA:CR43301		FBgn0036945	Ssk
			FBgn0263336	lncRNA:CR43417		FBgn0052676	stx
			FBgn0263406	lncRNA:CR43452		FBgn0051942	tRNA:Arg-TCT-2-1
			FBgn0265377	lncRNA:CR44318		FBgn0051416	tRNA:Asp-GTC-3-1
			FBgn0266405	lncRNA:CR45045		FBgn0266573	tRNA:Thr-TGT-2-3
			FBgn0267191	lncRNA:CR45631		FBgn0024361	Tsp2A
			FBgn0026197	lncRNA:noe		FBgn0033128	Tsp42Eg
			FBgn0030608	Lsd-2		FBgn0033133	Tsp42Ek
			FBgn0002563	Lsp1beta		FBgn0265974	ttv
			FBgn0002570	Mal-A1		FBgn0029128	tyn
			FBgn0002569	Mal-A2		FBgn0003961	Uro
			FBgn0002571	Mal-A3		FBgn0028554	x16
			FBgn0050360	Mal-A6
			FBgn0033296	Mal-A7
			FBgn0033297	Mal-A8
			FBgn0265487	mbl
			FBgn0032116	Mco1
			FBgn0019985	mGluR
			FBgn0021776	mira
			FBgn0263316	Mrp4
			FBgn0266369	Mtp
			FBgn0040299	Myo28B1
			FBgn0040705	ND-B8
			FBgn0002926	ndl
			FBgn0031081	Nep3
			FBgn0260011	NimC4
			FBgn0035092	Nplp1
			FBgn0040813	Nplp2
			FBgn0261613	Oaz
			FBgn0043535	Obp57a
			FBgn0039678	Obp99a
			FBgn0038980	Octbeta1R
			FBgn0038516	P5cr-2
			FBgn0034950	Pask
			FBgn0035231	Pcyt2
			FBgn0038237	Pde6
			FBgn0017558	Pdk
			FBgn0043576	PGRP-SC1a
			FBgn0263235	Phae2
			FBgn0016926	Pino
			FBgn0003091	Pkc53E
			FBgn0025739	pon
			FBgn0031802	ppk7
			FBgn0032358	Ppt2
			FBgn0041194	Prat2
			FBgn0033520	Prx2540-1
			FBgn0004368	Ptp4E
			FBgn0034085	Ptp52F
			FBgn0020385	pug
			FBgn0051864	Qtzl
			FBgn0004636	Rap1
			FBgn0260943	Rbp6
			FBgn0010263	Rbp9
			FBgn0265959	rdgC
			FBgn0021800	Reph
			FBgn0085426	Rgk3
			FBgn0003250	Rh4
			FBgn0027376	rha
			FBgn0004635	rho
			FBgn0025836	RhoGAP1A
			FBgn0014380	RhoL
			FBgn0039152	Root
			FBgn0003285	rst
			FBgn0034276	Sardh
			FBgn0003326	sca
			FBgn0261453	scaRNA:MeU2-C41
			FBgn0028993	scro
			FBgn0005590	scw
			FBgn0037912	sea
			FBgn0264273	Sema2b
			FBgn0031406	Send1
			FBgn0019928	Ser8
			FBgn0003386	Shaw
			FBgn0038880	SIFaR
			FBgn0035539	slow
			FBgn0038257	smp-30
			FBgn0065070	snoRNA:291
			FBgn0263475	snoRNA:CG16892-a
			FBgn0082925	snoRNA:Or-aca1
			FBgn0086603	snoRNA:Or-CD2
			FBgn0263484	snoRNA:Pi4KIIalpha-a
			FBgn0083058	snoRNA:Psi18S-1086
			FBgn0083057	snoRNA:Psi18S-110
			FBgn0083054	snoRNA:Psi18S-1347a
			FBgn0083049	snoRNA:Psi18S-1377c
			FBgn0083048	snoRNA:Psi18S-1377d
			FBgn0083047	snoRNA:Psi18S-1377e
			FBgn0083046	snoRNA:Psi18S-1389a
			FBgn0086659	snoRNA:Psi18S-176
			FBgn0026169	snoRNA:Psi18S-1820
			FBgn0083042	snoRNA:Psi18S-1854a
			FBgn0083040	snoRNA:Psi18S-1854c
			FBgn0083028	snoRNA:Psi18S-525k
			FBgn0083027	snoRNA:Psi18S-531
			FBgn0083016	snoRNA:Psi18S-841d
			FBgn0083013	snoRNA:Psi28S-1060
			FBgn0083012	snoRNA:Psi28S-1135a
			FBgn0083011	snoRNA:Psi28S-1135b
			FBgn0083010	snoRNA:Psi28S-1135c
			FBgn0083009	snoRNA:Psi28S-1135d
			FBgn0083005	snoRNA:Psi28S-1175a
			FBgn0083004	snoRNA:Psi28S-1175b
			FBgn0083003	snoRNA:Psi28S-1175c
			FBgn0083001	snoRNA:Psi28S-1192a
			FBgn0082994	snoRNA:Psi28S-1837c
			FBgn0082987	snoRNA:Psi28S-2444
			FBgn0086670	snoRNA:Psi28S-2622
			FBgn0082980	snoRNA:Psi28S-2996
			FBgn0082979	snoRNA:Psi28S-3091a
			FBgn0086662	snoRNA:Psi28S-3186
			FBgn0082973	snoRNA:Psi28S-3308
			FBgn0082966	snoRNA:Psi28S-3327b
			FBgn0082962	snoRNA:Psi28S-3385a
			FBgn0263468	snoRNA:SC35-a
			FBgn0032840	sNPF
			FBgn0004187	snRNA:U1:95Cc
			FBgn0003930	snRNA:U4:39B
			FBgn0003938	snRNA:U5:63BC
			FBgn0024289	Sodh-1
			FBgn0039232	sosie
			FBgn0039938	Sox102F
			FBgn0029768	SPR
			FBgn0014033	Sr-CI
			FBgn0025702	Srpk79D
			FBgn0033887	St4
			FBgn0266719	stac
			FBgn0038721	subdued
			FBgn0040271	Sulf1
			FBgn0037130	Syn1
			FBgn0261089	Sytalpha
			FBgn0041182	Tep2
			FBgn0041180	Tep4
			FBgn0011555	thetaTry
			FBgn0261560	Thor
			FBgn0003710	tipE
			FBgn0261575	tobi
			FBgn0036494	Toll-6
			FBgn0029114	Tollo
			FBgn0028396	TotA
			FBgn0044812	TotC
			FBgn0035719	tow
			FBgn0019650	toy
			FBgn0052493	tRNA:Gln-TTG-2-1
			FBgn0005614	trpl
			FBgn0031760	Tsp26A
			FBgn0034046	tun
			FBgn0039434	TwdlM
			FBgn0039441	TwdlN
			FBgn0038542	TyrR
			FBgn0003943	Ubi-p63E
			FBgn0003944	Ubx
			FBgn0026755	Ugt37b1
			FBgn0051352	Unc-115a
			FBgn0034013	unc-5
			FBgn0031424	VGlut
			FBgn0085362	Vml
			FBgn0086680	vvl
			FBgn0266418	wake
			FBgn0031176	whe
			FBgn0010194	Wnt5
			FBgn0016080	xmas-1
			FBgn0004047	Yp3
			FBgn0035917	Zasp66
			FBgn0033097	Zip42C.2
			FBgn0039714	Zip99C

## Sheet: D. Female LxT enrichment
Gene Ontology Category	Gene Ontology Term	Number Genes in Genome	Number Genes in List	Expected Number in List	Over (+) or Under (-) Represented	Fold Enrichment	P-value	FDR
Biological Process	cellular macromolecule metabolic process (GO:0044260)	2199	26	108.43	-	0.24	7.98e-23	6.21e-19
	cellular protein metabolic process (GO:0044267)	1664	19	82.05	-	0.23	1.96e-17	7.62e-14
	nucleic acid metabolic process (GO:0090304)	1077	9	53.11	-	0.17	8.88e-14	2.3e-10
	organelle organization (GO:0006996)	1761	31	86.83	-	0.36	1.69e-12	3.29e-09
	regulation of nucleobase-containing compound metabolic process (GO:0019219)	1358	19	66.96	-	0.28	4.12e-12	4.58e-09
	regulation of macromolecule biosynthetic process (GO:0010556)	1356	19	66.86	-	0.28	4.05e-12	5.25e-09
	regulation of cellular macromolecule biosynthetic process (GO:2000112)	1351	19	66.62	-	0.29	4.01e-12	6.24e-09
	regulation of gene expression (GO:0010468)	1618	28	79.78	-	0.35	9.34e-12	9.08e-09
	regulation of RNA metabolic process (GO:0051252)	1316	19	64.89	-	0.29	1.57e-11	1.36e-08
	cellular metabolic process (GO:0044237)	3832	113	188.95	-	0.6	2.87e-11	2.03e-08
	RNA metabolic process (GO:0016070)	819	6	40.38	-	0.15	2.79e-11	2.17e-08
	regulation of nitrogen compound metabolic process (GO:0051171)	1796	35	88.56	-	0.4	3.45e-11	2.24e-08
	gene expression (GO:0010467)	1118	14	55.13	-	0.25	4.01e-11	2.4e-08
	regulation of macromolecule metabolic process (GO:0060255)	1978	42	97.53	-	0.43	6.97e-11	3.88e-08
	regulation of nucleic acid-templated transcription (GO:1903506)	1167	16	57.54	-	0.28	9.76e-11	4.22e-08
	regulation of primary metabolic process (GO:0080090)	1825	37	89.99	-	0.41	1.06e-10	4.33e-08
	cellular macromolecule biosynthetic process (GO:0034645)	751	5	37.03	-	0.14	8.37e-11	4.34e-08
	regulation of transcription, DNA-templated (GO:0006355)	1167	16	57.54	-	0.28	9.76e-11	4.47e-08
	regulation of RNA biosynthetic process (GO:2001141)	1167	16	57.54	-	0.28	9.76e-11	4.75e-08
	heterocycle metabolic process (GO:0046483)	1415	24	69.77	-	0.34	1.8e-10	7.02e-08
	nucleobase-containing compound metabolic process (GO:0006139)	1337	22	65.93	-	0.33	2.46e-10	9.13e-08
	macromolecule biosynthetic process (GO:0009059)	770	6	37.97	-	0.16	2.61e-10	9.23e-08
	regulation of metabolic process (GO:0019222)	2138	50	105.42	-	0.47	4.33e-10	1.46e-07
	regulation of cellular biosynthetic process (GO:0031326)	1408	25	69.43	-	0.36	6.31e-10	1.96e-07
	macromolecule modification (GO:0043412)	1216	19	59.96	-	0.32	6.12e-10	1.99e-07
	cellular protein modification process (GO:0006464)	1117	16	55.08	-	0.29	7.49e-10	2.16e-07
	protein modification process (GO:0036211)	1117	16	55.08	-	0.29	7.49e-10	2.24e-07
	chromosome organization (GO:0051276)	555	2	27.37	-	0.07	1.11e-09	3.09e-07
	regulation of biosynthetic process (GO:0009889)	1416	26	69.82	-	0.37	1.61e-09	4.31e-07
	regulation of cellular metabolic process (GO:0031323)	1953	45	96.3	-	0.47	1.74e-09	4.52e-07
	cellular localization (GO:0051641)	1004	14	49.51	-	0.28	3.35e-09	8.42e-07
	cellular aromatic compound metabolic process (GO:0006725)	1460	29	71.99	-	0.4	6.34e-09	1.54e-06
	establishment of protein localization (GO:0045184)	454	1	22.39	-	0.04	1.2e-08	2.84e-06
	cellular nitrogen compound metabolic process (GO:0034641)	1768	41	87.18	-	0.47	1.86e-08	4.25e-06
	protein transport (GO:0015031)	432	1	21.3	-	0.05	2.48e-08	5.51e-06
	intracellular transport (GO:0046907)	662	6	32.64	-	0.18	3.06e-08	6.61e-06
	organic cyclic compound metabolic process (GO:1901360)	1519	33	74.9	-	0.44	3.74e-08	7.87e-06
	cellular macromolecule localization (GO:0070727)	579	5	28.55	-	0.18	1.32e-07	2.71e-05
	intracellular protein transport (GO:0006886)	340	0	16.76	-	< 0.01	1.46e-07	2.92e-05
	cellular process (GO:0009987)	7284	289	359.16	-	0.8	1.61e-07	3.12e-05
	establishment of localization in cell (GO:0051649)	796	11	39.25	-	0.28	1.92e-07	3.65e-05
	positive regulation of metabolic process (GO:0009893)	893	14	44.03	-	0.32	2.34e-07	4.34e-05
	protein localization (GO:0008104)	679	8	33.48	-	0.24	2.57e-07	4.54e-05
	regulation of cellular process (GO:0050794)	3662	122	180.57	-	0.68	2.56e-07	4.64e-05
	positive regulation of cellular metabolic process (GO:0031325)	815	12	40.19	-	0.3	2.84e-07	4.91e-05
	regulation of biological process (GO:0050789)	3924	134	193.49	-	0.69	3.64e-07	6.17e-05
	positive regulation of nitrogen compound metabolic process (GO:0051173)	733	10	36.14	-	0.28	4.62e-07	7.66e-05
	humoral immune response (GO:0006959)	46	14	2.27	+	6.17	5.21e-07	8.45e-05
	antibacterial humoral response (GO:0019731)	26	11	1.28	+	8.58	6.35e-07	0.000101
	macromolecule metabolic process (GO:0043170)	3165	103	156.06	-	0.66	9.49e-07	0.000148
	carbohydrate metabolic process (GO:0005975)	246	33	12.13	+	2.72	9.99e-07	0.000152
	cellular protein localization (GO:0034613)	525	5	25.89	-	0.19	1.63e-06	0.000239
	organelle assembly (GO:0070925)	397	2	19.58	-	0.1	1.62e-06	0.000242
	RNA processing (GO:0006396)	552	6	27.22	-	0.22	1.97e-06	0.000278
	biological regulation (GO:0065007)	4362	157	215.08	-	0.73	1.95e-06	0.000281
	regulation of transcription by RNA polymerase II (GO:0006357)	862	15	42.5	-	0.35	2.09e-06	0.00029
	positive regulation of macromolecule metabolic process (GO:0010604)	807	14	39.79	-	0.35	3.71e-06	0.000507
	positive regulation of biosynthetic process (GO:0009891)	536	6	26.43	-	0.23	3.89e-06	0.000514
	positive regulation of cellular biosynthetic process (GO:0031328)	536	6	26.43	-	0.23	3.89e-06	0.000522
	antimicrobial humoral response (GO:0019730)	33	11	1.63	+	6.76	4.22e-06	0.000547
	positive regulation of macromolecule biosynthetic process (GO:0010557)	493	5	24.31	-	0.21	4.48e-06	0.000572
	positive regulation of nucleobase-containing compound metabolic process (GO:0045935)	498	5	24.56	-	0.2	4.57e-06	0.000574
	cell cycle (GO:0007049)	599	8	29.54	-	0.27	5.16e-06	0.000618
	peptidyl-amino acid modification (GO:0018193)	373	2	18.39	-	0.11	5.06e-06	0.000624
	positive regulation of cellular process (GO:0048522)	1587	42	78.25	-	0.54	5.16e-06	0.000627
	response to biotic stimulus (GO:0009607)	381	42	18.79	+	2.24	5.8e-06	0.000664
	response to other organism (GO:0051707)	381	42	18.79	+	2.24	5.8e-06	0.000674
	response to external biotic stimulus (GO:0043207)	381	42	18.79	+	2.24	5.8e-06	0.000684
	defense response (GO:0006952)	348	39	17.16	+	2.27	7.28e-06	0.000821
	cellular component organization or biogenesis (GO:0071840)	2795	92	137.82	-	0.67	9.19e-06	0.00101
	positive regulation of RNA metabolic process (GO:0051254)	480	5	23.67	-	0.21	9.06e-06	0.00101
	chromatin organization (GO:0006325)	351	2	17.31	-	0.12	1.02e-05	0.0011
	protein localization to organelle (GO:0033365)	246	0	12.13	-	< 0.01	1.13e-05	0.00121
	translation (GO:0006412)	305	1	15.04	-	0.07	1.32e-05	0.00139
	cellular component biogenesis (GO:0044085)	1200	29	59.17	-	0.49	1.53e-05	0.00159
	immune response (GO:0006955)	360	39	17.75	+	2.2	1.77e-05	0.00181
	biological process involved in interspecies interaction between organisms (GO:0044419)	406	42	20.02	+	2.1	1.97e-05	0.002
	response to external stimulus (GO:0009605)	902	75	44.48	+	1.69	2.1e-05	0.0021
	carboxylic acid biosynthetic process (GO:0046394)	120	19	5.92	+	3.21	2.7e-05	0.00259
	defense response to other organism (GO:0098542)	330	36	16.27	+	2.21	2.63e-05	0.00259
	organic acid biosynthetic process (GO:0016053)	120	19	5.92	+	3.21	2.7e-05	0.00262
	cellular component organization (GO:0016043)	2640	89	130.17	-	0.68	4.62e-05	0.00439
	positive regulation of nucleic acid-templated transcription (GO:1903508)	435	5	21.45	-	0.23	4.9e-05	0.00449
	positive regulation of transcription, DNA-templated (GO:0045893)	435	5	21.45	-	0.23	4.9e-05	0.00454
	positive regulation of RNA biosynthetic process (GO:1902680)	435	5	21.45	-	0.23	4.9e-05	0.00459
	immune system process (GO:0002376)	457	44	22.53	+	1.95	5.91e-05	0.00534
	peptide biosynthetic process (GO:0043043)	310	2	15.29	-	0.13	6.42e-05	0.00575
	nitrogen compound transport (GO:0071705)	594	10	29.29	-	0.34	7.25e-05	0.00641
	microtubule-based process (GO:0007017)	460	6	22.68	-	0.26	7.89e-05	0.0069
	negative regulation of nucleobase-containing compound metabolic process (GO:0045934)	389	4	19.18	-	0.21	8.29e-05	0.00717
	male gamete generation (GO:0048232)	300	2	14.79	-	0.14	9.22e-05	0.00788
	positive regulation of biological process (GO:0048518)	1717	52	84.66	-	0.61	9.35e-05	0.00791
	lipid catabolic process (GO:0016042)	123	18	6.06	+	2.97	0.000108	0.00903
	ncRNA metabolic process (GO:0034660)	335	3	16.52	-	0.18	0.000127	0.0105
	cellular component assembly (GO:0022607)	1029	26	50.74	-	0.51	0.000149	0.0122
	negative regulation of RNA metabolic process (GO:0051253)	373	4	18.39	-	0.22	0.000166	0.0135
	cell cycle process (GO:0022402)	503	8	24.8	-	0.32	0.00017	0.0136
	gamete generation (GO:0007276)	885	21	43.64	-	0.48	0.00018	0.0143
	cellular nitrogen compound biosynthetic process (GO:0044271)	712	15	35.11	-	0.43	0.000206	0.0162
	cellular macromolecule catabolic process (GO:0044265)	435	6	21.45	-	0.28	0.00021	0.0162
	negative regulation of cellular macromolecule biosynthetic process (GO:2000113)	437	6	21.55	-	0.28	0.000214	0.0162
	response to bacterium (GO:0009617)	226	26	11.14	+	2.33	0.000209	0.0163
	negative regulation of macromolecule biosynthetic process (GO:0010558)	437	6	21.55	-	0.28	0.000214	0.0163
	proteolysis (GO:0006508)	849	67	41.86	+	1.6	0.000266	0.0199
	covalent chromatin modification (GO:0016569)	181	0	8.92	-	< 0.01	0.000277	0.0203
	histone modification (GO:0016570)	181	0	8.92	-	< 0.01	0.000277	0.0205
	negative regulation of nucleic acid-templated transcription (GO:1903507)	354	4	17.46	-	0.23	0.00032	0.0228
	negative regulation of transcription, DNA-templated (GO:0045892)	354	4	17.46	-	0.23	0.00032	0.023
	negative regulation of RNA biosynthetic process (GO:1902679)	354	4	17.46	-	0.23	0.00032	0.0232
	fatty acid biosynthetic process (GO:0006633)	69	12	3.4	+	3.53	0.000379	0.0268
	mRNA metabolic process (GO:0016071)	339	4	16.72	-	0.24	0.000433	0.0304
	establishment of protein localization to organelle (GO:0072594)	177	0	8.73	-	< 0.01	0.000438	0.0304
	mannose metabolic process (GO:0006013)	10	5	0.49	+	10.14	0.000457	0.0315
	monocarboxylic acid biosynthetic process (GO:0072330)	72	12	3.55	+	3.38	0.000532	0.0363
	cellular process involved in reproduction in multicellular organism (GO:0022412)	822	20	40.53	-	0.49	0.000538	0.0364
Molecular Function	hydrolase activity (GO:0016787)	1571	152	77.46	+	1.96	3.33e-15	9.57e-12
	nucleic acid binding (GO:0003676)	1691	27	83.38	-	0.32	2.42e-13	3.48e-10
	serine hydrolase activity (GO:0017171)	321	50	15.83	+	3.16	1.48e-11	1.42e-08
	hydrolase activity, hydrolyzing O-glycosyl compounds (GO:0004553)	84	22	4.14	+	5.31	3.22e-09	2.31e-06
	peptidase activity (GO:0008233)	514	60	25.34	+	2.37	7.13e-09	3.42e-06
	serine-type peptidase activity (GO:0008236)	260	39	12.82	+	3.04	6.99e-09	4.02e-06
	hydrolase activity, acting on glycosyl bonds (GO:0016798)	95	22	4.68	+	4.7	2.2e-08	9.01e-06
	catalytic activity (GO:0003824)	3791	253	186.93	+	1.35	8.43e-08	3.03e-05
	serine-type endopeptidase activity (GO:0004252)	240	34	11.83	+	2.87	2.2e-07	7.04e-05
	heterocyclic compound binding (GO:1901363)	2668	80	131.56	-	0.61	2.89e-07	8.32e-05
	DNA binding (GO:0003677)	936	16	46.15	-	0.35	4.51e-07	0.000118
	alpha-1,4-glucosidase activity (GO:0004558)	10	8	0.49	+	16.22	6.57e-07	0.000145
	maltose alpha-glucosidase activity (GO:0032450)	10	8	0.49	+	16.22	6.57e-07	0.000157
	organic cyclic compound binding (GO:0097159)	2689	83	132.59	-	0.63	9.13e-07	0.000187
	glucosidase activity (GO:0015926)	16	9	0.79	+	11.41	1.1e-06	0.000211
	endopeptidase activity (GO:0004175)	376	43	18.54	+	2.32	1.54e-06	0.000277
	alpha-glucosidase activity (GO:0090599)	12	8	0.59	+	13.52	1.74e-06	0.000294
	RNA binding (GO:0003723)	676	10	33.33	-	0.3	4.5e-06	0.000718
	heme binding (GO:0020037)	139	22	6.85	+	3.21	6.42e-06	0.000971
	tetrapyrrole binding (GO:0046906)	140	22	6.9	+	3.19	7.11e-06	0.00102
	iron ion binding (GO:0005506)	153	23	7.54	+	3.05	8.48e-06	0.00116
	carbohydrate binding (GO:0030246)	121	19	5.97	+	3.18	2.98e-05	0.0039
	carboxypeptidase activity (GO:0004180)	28	9	1.38	+	6.52	4.03e-05	0.00503
	lipase activity (GO:0016298)	93	16	4.59	+	3.49	4.78e-05	0.00572
	chromatin binding (GO:0003682)	217	0	10.7	-	< 0.01	5.86e-05	0.00674
	peptidoglycan binding (GO:0042834)	16	7	0.79	+	8.87	6.21e-05	0.00687
	transcription regulator activity (GO:0140110)	720	14	35.5	-	0.39	7.08e-05	0.00753
	protein binding (GO:0005515)	2290	75	112.92	-	0.66	8.06e-05	0.00827
	glycosaminoglycan binding (GO:0005539)	40	10	1.97	+	5.07	9.16e-05	0.00908
	carboxylic ester hydrolase activity (GO:0052689)	137	19	6.76	+	2.81	0.000132	0.0127
	exopeptidase activity (GO:0008238)	82	14	4.04	+	3.46	0.00015	0.0139
	catalytic activity, acting on a nucleic acid (GO:0140640)	362	4	17.85	-	0.22	0.000227	0.0204
	scavenger receptor activity (GO:0005044)	21	7	1.04	+	6.76	0.000244	0.0213
	triglyceride lipase activity (GO:0004806)	56	11	2.76	+	3.98	0.000264	0.0223
	chitin binding (GO:0008061)	123	17	6.06	+	2.8	0.000305	0.025
	metallocarboxypeptidase activity (GO:0004181)	23	7	1.13	+	6.17	0.000387	0.0309
	structural constituent of ribosome (GO:0003735)	173	0	8.53	-	< 0.01	0.000413	0.0321
	oxidoreductase activity, acting on paired donors, with incorporation or reduction of molecular oxygen (GO:0016705)	168	20	8.28	+	2.41	0.00066	0.0499
Cellular Component	intracellular organelle (GO:0043229)	5451	124	268.78	-	0.46	1.53e-31	2.05e-28
	organelle (GO:0043226)	5549	129	273.61	-	0.47	4.1e-31	2.75e-28
	intracellular anatomical structure (GO:0005622)	6531	178	322.03	-	0.55	2.16e-28	9.67e-26
	intracellular membrane-bounded organelle (GO:0043231)	4825	107	237.91	-	0.45	5.42e-28	1.82e-25
	membrane-bounded organelle (GO:0043227)	5019	115	247.48	-	0.46	7.08e-28	1.9e-25
	nucleus (GO:0005634)	2763	44	136.24	-	0.32	1.99e-22	4.45e-20
	protein-containing complex (GO:0032991)	2708	49	133.53	-	0.37	7.08e-19	1.36e-16
	extracellular region (GO:0005576)	1031	120	50.84	+	2.36	3.24e-17	5.44e-15
	Unclassified (UNCLASSIFIED)	2938	229	144.87	+	1.58	4.77e-13	6.4e-11
	cellular_component (GO:0005575)	10873	452	536.13	-	0.84	4.77e-13	7.12e-11
	extracellular space (GO:0005615)	683	82	33.68	+	2.43	1.73e-12	2.11e-10
	catalytic complex (GO:1902494)	984	9	48.52	-	0.19	5.4e-12	6.04e-10
	nuclear protein-containing complex (GO:0140513)	830	6	40.93	-	0.15	1.92e-11	1.71e-09
	non-membrane-bounded organelle (GO:0043228)	1574	27	77.61	-	0.35	1.83e-11	1.76e-09
	intracellular non-membrane-bounded organelle (GO:0043232)	1574	27	77.61	-	0.35	1.83e-11	1.89e-09
	cytoplasm (GO:0005737)	4433	145	218.58	-	0.66	1.04e-09	8.69e-08
	intracellular organelle lumen (GO:0070013)	1001	14	49.36	-	0.28	4.83e-09	3.81e-07
	nuclear lumen (GO:0031981)	812	9	40.04	-	0.22	7.12e-09	5.31e-07
	membrane-enclosed lumen (GO:0031974)	1002	15	49.41	-	0.3	1.34e-08	9.01e-07
	organelle lumen (GO:0043233)	1002	15	49.41	-	0.3	1.34e-08	9.49e-07
	transferase complex (GO:1990234)	482	2	23.77	-	0.08	3.71e-08	2.37e-06
	intracellular protein-containing complex (GO:0140535)	520	4	25.64	-	0.16	2.81e-07	1.64e-05
	ribonucleoprotein complex (GO:1990904)	564	5	27.81	-	0.18	2.7e-07	1.65e-05
	mitochondrion (GO:0005739)	854	14	42.11	-	0.33	8.05e-07	4.5e-05
	chromosome (GO:0005694)	574	6	28.3	-	0.21	1.01e-06	5.41e-05
	organelle envelope (GO:0031967)	451	4	22.24	-	0.18	4.95e-06	0.000246
	envelope (GO:0031975)	451	4	22.24	-	0.18	4.95e-06	0.000255
	nucleoplasm (GO:0005654)	538	7	26.53	-	0.26	1.76e-05	0.000844
	microtubule cytoskeleton (GO:0015630)	369	4	18.19	-	0.22	0.00016	0.00739
	chromatin (GO:0000785)	278	2	13.71	-	0.15	0.000278	0.012
	ribosome (GO:0005840)	185	0	9.12	-	< 0.01	0.000293	0.0123
	cellular anatomical entity (GO:0110165)	9084	401	447.92	-	0.9	0.000276	0.0124
	ribosomal subunit (GO:0044391)	174	0	8.58	-	< 0.01	0.000417	0.0169
	mitochondrial membrane (GO:0031966)	298	3	14.69	-	0.2	0.000509	0.0201
	mitochondrial protein-containing complex (GO:0098798)	258	2	12.72	-	0.16	0.00056	0.0215
	mitochondrial envelope (GO:0005740)	323	4	15.93	-	0.25	0.000841	0.0314
	ubiquitin ligase complex (GO:0000151)	159	0	7.84	-	< 0.01	0.000943	0.0342
	cell surface (GO:0009986)	69	11	3.4	+	3.23	0.00124	0.0438
PANTHER Protein Class	hydrolase (PC00121)	384	59	18.93	+	3.12	3.3e-13	6.18e-11
	metabolite interconversion enzyme (PC00262)	1529	133	75.39	+	1.76	3.4e-10	3.18e-08
	nucleic acid metabolism protein (PC00171)	616	3	30.37	-	0.1	6.59e-10	4.11e-08
	amylase (PC00048)	15	11	0.74	+	14.87	9.22e-09	4.31e-07
	RNA metabolism protein (PC00031)	475	3	23.42	-	0.13	4.12e-07	1.54e-05
	oxygenase (PC00177)	109	19	5.37	+	3.54	8.13e-06	0.000253
	lipase (PC00143)	78	15	3.85	+	3.9	2.65e-05	0.000708
	metalloprotease (PC00153)	148	20	7.3	+	2.74	0.000122	0.00254
	protease (PC00190)	501	46	24.7	+	1.86	0.00012	0.0028
	gene-specific transcriptional regulator (PC00264)	589	11	29.04	-	0.38	0.000236	0.00442
	ribosomal protein (PC00202)	172	0	8.48	-	< 0.01	0.00041	0.00639
	translational protein (PC00263)	314	3	15.48	-	0.19	0.000377	0.00642
	serine protease (PC00203)	203	23	10.01	+	2.3	0.000627	0.00902
	DNA-binding transcription factor (PC00218)	556	11	27.42	-	0.4	0.000748	0.00999
	microtubule or microtubule-binding cytoskeletal protein (PC00157)	152	0	7.49	-	< 0.01	0.00143	0.0168
	chaperone (PC00072)	146	0	7.2	-	< 0.01	0.00136	0.0169
	DNA metabolism protein (PC00009)	135	0	6.66	-	< 0.01	0.00315	0.0347
Reactome Pathway	Gene expression (Transcription) (R-DME-74160)	537	3	26.48	-	0.11	2e-08	2.83e-05
	Digestion and absorption (R-DME-8963743)	43	15	2.12	+	7.07	4.66e-08	3.3e-05
	RNA Polymerase II Transcription (R-DME-73857)	463	3	22.83	-	0.13	5.75e-07	0.000271
	Digestion (R-DME-8935690)	36	12	1.78	+	6.76	1.54e-06	0.000546
	Metabolism of lipids (R-DME-556833)	416	45	20.51	+	2.19	3.09e-06	0.000876
	Metabolism of RNA (R-DME-8953854)	485	6	23.91	-	0.25	2.93e-05	0.00691
	Generic Transcription Pathway (R-DME-212436)	363	3	17.9	-	0.17	4.49e-05	0.00795
	Metabolism (R-DME-1430728)	1145	89	56.46	+	1.58	4.1e-05	0.00829
	Cytochrome P450 - arranged by substrate type (R-DME-211897)	26	8	1.28	+	6.24	0.00014	0.0165
	Endogenous sterols (R-DME-211976)	26	8	1.28	+	6.24	0.00014	0.018
	Glycerophospholipid biosynthesis (R-DME-1483206)	105	16	5.18	+	3.09	0.00017	0.0185
	SLC-mediated transmembrane transport (R-DME-425407)	197	24	9.71	+	2.47	0.000138	0.0196
	Lysosomal oligosaccharide catabolism (R-DME-8853383)	7	5	0.35	+	14.49	0.000136	0.0213
	Regulation of insulin secretion (R-DME-422356)	37	9	1.82	+	4.93	0.000244	0.0247
	Integration of energy metabolism (R-DME-163685)	47	10	2.32	+	4.31	0.000286	0.027
	Estrogen biosynthesis (R-DME-193144)	40	9	1.97	+	4.56	0.000402	0.0335
	Synthesis of PA (R-DME-1483166)	59	11	2.91	+	3.78	0.000392	0.0347
	Na+/Cl- dependent neurotransmitter transporters (R-DME-442660)	41	9	2.02	+	4.45	0.00047	0.037
	Fatty acid metabolism (R-DME-8978868)	117	16	5.77	+	2.77	0.000504	0.0376
	Metabolism of steroid hormones (R-DME-196071)	43	9	2.12	+	4.24	0.000635	0.0428
	Metabolism of Angiotensinogen to Angiotensins (R-DME-2022377)	43	9	2.12	+	4.24	0.000635	0.0449

## Sheet: E. Male LxT enrichment
Gene Ontology Category	Gene Ontology Term	Number Genes in Genome	Number Genes in List	Expected Number in List	Over (+) or Under (-) Represented	Fold Enrichment	P-value	FDR
Biological Process	cellular macromolecule metabolic process (GO:0044260)	2199	32	83.27	-	0.38	2.86e-11	2.22e-07
	regulation of cellular process (GO:0050794)	3662	76	138.67	-	0.55	1.19e-10	4.65e-07
	cellular protein metabolic process (GO:0044267)	1664	21	63.01	-	0.33	4.46e-10	1.16e-06
	organelle organization (GO:0006996)	1761	24	66.69	-	0.36	8.06e-10	1.57e-06
	defense response to bacterium (GO:0042742)	197	29	7.46	+	3.89	3.69e-09	2.87e-06
	response to biotic stimulus (GO:0009607)	381	42	14.43	+	2.91	3.68e-09	3.18e-06
	response to bacterium (GO:0009617)	226	31	8.56	+	3.62	4.82e-09	3.41e-06
	regulation of macromolecule biosynthetic process (GO:0010556)	1356	16	51.35	-	0.31	5.89e-09	3.53e-06
	response to other organism (GO:0051707)	381	42	14.43	+	2.91	3.68e-09	3.58e-06
	antibacterial humoral response (GO:0019731)	26	12	0.98	+	12.19	5.59e-09	3.63e-06
	defense response to other organism (GO:0098542)	330	38	12.5	+	3.04	7.22e-09	4.01e-06
	regulation of cellular macromolecule biosynthetic process (GO:2000112)	1351	16	51.16	-	0.31	8.24e-09	4.01e-06
	response to external biotic stimulus (GO:0043207)	381	42	14.43	+	2.91	3.68e-09	4.09e-06
	defense response (GO:0006952)	348	39	13.18	+	2.96	9.01e-09	4.12e-06
	regulation of primary metabolic process (GO:0080090)	1825	28	69.11	-	0.41	8.24e-09	4.28e-06
	humoral immune response (GO:0006959)	46	15	1.74	+	8.61	3.32e-09	4.31e-06
	regulation of biological process (GO:0050789)	3924	89	148.6	-	0.6	2.91e-09	4.52e-06
	biological process involved in interspecies interaction between organisms (GO:0044419)	406	42	15.37	+	2.73	1.98e-08	8.57e-06
	cellular component organization or biogenesis (GO:0071840)	2795	57	105.84	-	0.54	2.72e-08	1.11e-05
	regulation of nitrogen compound metabolic process (GO:0051171)	1796	29	68.01	-	0.43	4.72e-08	1.75e-05
	antimicrobial humoral response (GO:0019730)	33	12	1.25	+	9.6	4.7e-08	1.83e-05
	immune response (GO:0006955)	360	38	13.63	+	2.79	5.96e-08	2.02e-05
	regulation of nucleobase-containing compound metabolic process (GO:0019219)	1358	18	51.43	-	0.35	5.85e-08	2.07e-05
	cellular process (GO:0009987)	7284	213	275.83	-	0.77	7.73e-08	2.51e-05
	defense response to Gram-positive bacterium (GO:0050830)	47	13	1.78	+	7.3	1.88e-07	5.84e-05
	regulation of RNA metabolic process (GO:0051252)	1316	18	49.83	-	0.36	2.07e-07	6.19e-05
	macromolecule modification (GO:0043412)	1216	16	46.05	-	0.35	2.86e-07	8.25e-05
	regulation of cellular biosynthetic process (GO:0031326)	1408	21	53.32	-	0.39	3.46e-07	8.97e-05
	cellular component organization (GO:0016043)	2640	56	99.97	-	0.56	3.42e-07	9.17e-05
	regulation of nucleic acid-templated transcription (GO:1903506)	1167	15	44.19	-	0.34	3.89e-07	9.18e-05
	cellular localization (GO:0051641)	1004	11	38.02	-	0.29	3.36e-07	9.33e-05
	regulation of transcription, DNA-templated (GO:0006355)	1167	15	44.19	-	0.34	3.89e-07	9.46e-05
	regulation of cellular metabolic process (GO:0031323)	1953	36	73.96	-	0.49	4.22e-07	9.66e-05
	regulation of RNA biosynthetic process (GO:2001141)	1167	15	44.19	-	0.34	3.89e-07	9.77e-05
	response to external stimulus (GO:0009605)	902	67	34.16	+	1.96	4.56e-07	0.000101
	gene expression (GO:0010467)	1118	14	42.34	-	0.33	5.31e-07	0.000115
	biological regulation (GO:0065007)	4362	113	165.18	-	0.68	6.82e-07	0.000143
	regulation of metabolic process (GO:0019222)	2138	42	80.96	-	0.52	8.1e-07	0.000162
	regulation of biosynthetic process (GO:0009889)	1416	22	53.62	-	0.41	8.02e-07	0.000164
	proteolysis (GO:0006508)	849	63	32.15	+	1.96	9.18e-07	0.000179
	nucleic acid metabolic process (GO:0090304)	1077	14	40.78	-	0.34	1.36e-06	0.00024
	RNA metabolic process (GO:0016070)	819	8	31.01	-	0.26	1.33e-06	0.000241
	regulation of macromolecule metabolic process (GO:0060255)	1978	38	74.9	-	0.51	1.31e-06	0.000243
	establishment of protein localization (GO:0045184)	454	1	17.19	-	0.06	1.31e-06	0.000249
	defense response to Gram-negative bacterium (GO:0050829)	103	17	3.9	+	4.36	1.62e-06	0.000281
	establishment of localization in cell (GO:0051649)	796	8	30.14	-	0.27	2.6e-06	0.000439
	positive regulation of cellular process (GO:0048522)	1587	28	60.1	-	0.47	2.82e-06	0.000458
	protein transport (GO:0015031)	432	1	16.36	-	0.06	2.82e-06	0.000467
	immune system process (GO:0002376)	457	40	17.31	+	2.31	3.77e-06	0.000599
	cellular component biogenesis (GO:0044085)	1200	18	45.44	-	0.4	4.28e-06	0.000666
	cellular protein modification process (GO:0006464)	1117	16	42.3	-	0.38	4.54e-06	0.000679
	protein modification process (GO:0036211)	1117	16	42.3	-	0.38	4.54e-06	0.000693
	protein localization (GO:0008104)	679	6	25.71	-	0.23	5.43e-06	0.000797
	reproductive process (GO:0022414)	1150	17	43.55	-	0.39	6.04e-06	0.00087
	cellular macromolecule localization (GO:0070727)	579	4	21.93	-	0.18	7.35e-06	0.00104
	regulation of defense response to bacterium (GO:1900424)	69	13	2.61	+	4.98	7.78e-06	0.00108
	intracellular transport (GO:0046907)	662	6	25.07	-	0.24	1.08e-05	0.00148
	regulation of gene expression (GO:0010468)	1618	31	61.27	-	0.51	1.36e-05	0.00179
	regulation of cellular component organization (GO:0051128)	740	8	28.02	-	0.29	1.34e-05	0.0018
	animal organ development (GO:0048513)	1128	18	42.72	-	0.42	2.4e-05	0.00311
	cellular metabolic process (GO:0044237)	3832	103	145.11	-	0.71	3.3e-05	0.00421
	defense response to insect (GO:0002213)	7	5	0.27	+	18.86	4.06e-05	0.0051
	cellular protein localization (GO:0034613)	525	4	19.88	-	0.2	4.28e-05	0.00529
	peptide catabolic process (GO:0043171)	29	8	1.1	+	7.28	4.51e-05	0.0054
	anatomical structure morphogenesis (GO:0009653)	1429	27	54.11	-	0.5	4.47e-05	0.00543
	cellular process involved in reproduction in multicellular organism (GO:0022412)	822	11	31.13	-	0.35	5.33e-05	0.00619
	developmental process involved in reproduction (GO:0003006)	863	12	32.68	-	0.37	5.31e-05	0.00627
	positive regulation of biological process (GO:0048518)	1717	36	65.02	-	0.55	5.7e-05	0.00652
	multi-organism process (GO:0051704)	1016	16	38.47	-	0.42	6.33e-05	0.00675
	cell differentiation (GO:0030154)	1554	31	58.85	-	0.53	6.29e-05	0.0068
	sexual reproduction (GO:0019953)	1015	16	38.44	-	0.42	6.29e-05	0.0069
	multicellular organismal reproductive process (GO:0048609)	1006	16	38.1	-	0.42	6.17e-05	0.00695
	multi-organism reproductive process (GO:0044703)	1015	16	38.44	-	0.42	6.29e-05	0.007
	positive regulation of metabolic process (GO:0009893)	893	13	33.82	-	0.38	7.04e-05	0.00711
	chromosome organization (GO:0051276)	555	5	21.02	-	0.24	7.13e-05	0.00711
	oogenesis (GO:0048477)	553	5	20.94	-	0.24	7.03e-05	0.00719
	RNA processing (GO:0006396)	552	5	20.9	-	0.24	6.99e-05	0.00725
	gamete generation (GO:0007276)	885	13	33.51	-	0.39	6.93e-05	0.00729
	developmental process (GO:0032502)	2704	67	102.4	-	0.65	7.44e-05	0.00733
	nitrogen compound transport (GO:0071705)	594	6	22.49	-	0.27	7.94e-05	0.00772
	cellular developmental process (GO:0048869)	1568	32	59.38	-	0.54	9.14e-05	0.00878
	intracellular protein transport (GO:0006886)	340	1	12.88	-	0.08	9.33e-05	0.00885
	cellular component assembly (GO:0022607)	1029	17	38.97	-	0.44	0.000103	0.00961
	regulation of transcription by RNA polymerase II (GO:0006357)	862	13	32.64	-	0.4	0.000123	0.0114
	cellular macromolecule biosynthetic process (GO:0034645)	751	10	28.44	-	0.35	0.000134	0.0123
	positive regulation of cellular metabolic process (GO:0031325)	815	12	30.86	-	0.39	0.000171	0.0154
	macromolecule biosynthetic process (GO:0009059)	770	11	29.16	-	0.38	0.000173	0.0155
	multicellular organismal process (GO:0032501)	3422	93	129.59	-	0.72	0.000188	0.0166
	heterocycle metabolic process (GO:0046483)	1415	29	53.58	-	0.54	0.000205	0.0179
	peptidyl-amino acid modification (GO:0018193)	373	2	14.12	-	0.14	0.000207	0.0179
	female gamete generation (GO:0007292)	604	7	22.87	-	0.31	0.000228	0.0195
	germ cell development (GO:0007281)	686	9	25.98	-	0.35	0.000241	0.0204
	nucleobase-containing compound metabolic process (GO:0006139)	1337	27	50.63	-	0.53	0.000254	0.0213
	regulation of developmental growth (GO:0048638)	231	0	8.75	-	< 0.01	0.000288	0.0238
	regulation of response to biotic stimulus (GO:0002831)	178	18	6.74	+	2.67	0.000305	0.025
	anatomical structure development (GO:0048856)	2577	66	97.59	-	0.68	0.000354	0.0287
	regulation of defense response (GO:0031347)	165	17	6.25	+	2.72	0.000365	0.029
	positive regulation of macromolecule biosynthetic process (GO:0010557)	493	5	18.67	-	0.27	0.000361	0.029
	multicellular organism development (GO:0007275)	2226	55	84.29	-	0.65	0.000397	0.0312
	organic cyclic compound metabolic process (GO:1901360)	1519	33	57.52	-	0.57	0.000418	0.0326
	system development (GO:0048731)	1611	36	61.01	-	0.59	0.000456	0.0351
	positive regulation of macromolecule metabolic process (GO:0010604)	807	13	30.56	-	0.43	0.000506	0.0386
	positive regulation of defense response (GO:0031349)	95	12	3.6	+	3.34	0.00052	0.0393
	positive regulation of nitrogen compound metabolic process (GO:0051173)	733	11	27.76	-	0.4	0.000566	0.0423
	cellular aromatic compound metabolic process (GO:0006725)	1460	32	55.29	-	0.58	0.000589	0.0432
	ncRNA metabolic process (GO:0034660)	335	2	12.69	-	0.16	0.000583	0.0432
	neutral lipid metabolic process (GO:0006638)	34	7	1.29	+	5.44	0.000632	0.0447
	regulation of biosynthetic process of antibacterial peptides active against Gram-negative bacteria (GO:0002813)	15	5	0.57	+	8.8	0.000624	0.0449
	acylglycerol metabolic process (GO:0006639)	34	7	1.29	+	5.44	0.000632	0.0451
	positive regulation of defense response to bacterium (GO:1900426)	45	8	1.7	+	4.69	0.000621	0.0451
	triglyceride metabolic process (GO:0006641)	24	6	0.91	+	6.6	0.000645	0.0452
	lipid localization (GO:0010876)	99	12	3.75	+	3.2	0.000726	0.05
	regulation of immune response (GO:0050776)	201	19	7.61	+	2.5	0.00072	0.05
Molecular Function	hydrolase activity (GO:0016787)	1571	126	59.49	+	2.12	1.71e-15	4.93e-12
	peptidase activity (GO:0008233)	514	55	19.46	+	2.83	3.38e-11	4.86e-08
	nucleic acid binding (GO:0003676)	1691	24	64.04	-	0.37	5.54e-09	5.31e-06
	endopeptidase activity (GO:0004175)	376	41	14.24	+	2.88	7.57e-09	5.44e-06
	serine hydrolase activity (GO:0017171)	321	37	12.16	+	3.04	1.12e-08	6.43e-06
	serine-type endopeptidase activity (GO:0004252)	240	31	9.09	+	3.41	1.72e-08	8.22e-06
	serine-type peptidase activity (GO:0008236)	260	31	9.85	+	3.15	8.96e-08	3.68e-05
	hydrolase activity, acting on glycosyl bonds (GO:0016798)	95	18	3.6	+	5	1.33e-07	4.24e-05
	catalytic activity (GO:0003824)	3791	200	143.56	+	1.39	1.6e-07	4.59e-05
	hydrolase activity, hydrolyzing O-glycosyl compounds (GO:0004553)	84	17	3.18	+	5.34	1.3e-07	4.66e-05
	carbohydrate binding (GO:0030246)	121	20	4.58	+	4.36	1.93e-07	5.05e-05
	protein binding (GO:0005515)	2290	49	86.72	-	0.57	4.13e-06	0.000989
	DNA binding (GO:0003677)	936	12	35.44	-	0.34	8.8e-06	0.00181
	metallopeptidase activity (GO:0008237)	145	19	5.49	+	3.46	8.54e-06	0.00189
	metalloexopeptidase activity (GO:0008235)	60	12	2.27	+	5.28	1.02e-05	0.00196
	heterocyclic compound binding (GO:1901363)	2668	63	101.03	-	0.62	1.52e-05	0.00273
	chitin binding (GO:0008061)	123	16	4.66	+	3.44	4.71e-05	0.00796
	organic cyclic compound binding (GO:0097159)	2689	66	101.83	-	0.65	5.64e-05	0.00852
	iron ion binding (GO:0005506)	153	18	5.79	+	3.11	5.37e-05	0.00857
	cation binding (GO:0043169)	1064	67	40.29	+	1.66	6.69e-05	0.00962
	peptidoglycan muralytic activity (GO:0061783)	23	7	0.87	+	8.04	8.1e-05	0.0111
	peptidoglycan binding (GO:0042834)	16	6	0.61	+	9.9	0.000104	0.0136
	exopeptidase activity (GO:0008238)	82	12	3.11	+	3.86	0.000154	0.0192
	transition metal ion binding (GO:0046914)	704	48	26.66	+	1.8	0.000185	0.0222
	metal ion binding (GO:0046872)	1038	64	39.31	+	1.63	0.00021	0.0242
	RNA binding (GO:0003723)	676	9	25.6	-	0.35	0.000329	0.0364
	alkaline phosphatase activity (GO:0004035)	13	5	0.49	+	10.16	0.000366	0.039
	galactose binding (GO:0005534)	14	5	0.53	+	9.43	0.000482	0.0495
Cellular Component	intracellular organelle (GO:0043229)	5451	110	206.42	-	0.53	1.04e-18	1.4e-15
	organelle (GO:0043226)	5549	115	210.13	-	0.55	4.81e-18	3.22e-15
	intracellular anatomical structure (GO:0005622)	6531	149	247.32	-	0.6	9.69e-18	4.33e-15
	protein-containing complex (GO:0032991)	2708	35	102.55	-	0.34	3.2e-16	1.07e-13
	membrane-bounded organelle (GO:0043227)	5019	106	190.06	-	0.56	4.79e-15	1.29e-12
	intracellular membrane-bounded organelle (GO:0043231)	4825	100	182.71	-	0.55	5.78e-15	1.29e-12
	nucleus (GO:0005634)	2763	42	104.63	-	0.4	1.48e-13	2.84e-11
	extracellular region (GO:0005576)	1031	88	39.04	+	2.25	5.43e-12	9.11e-10
	extracellular space (GO:0005615)	683	63	25.86	+	2.44	5.45e-10	8.13e-08
	non-membrane-bounded organelle (GO:0043228)	1574	21	59.6	-	0.35	4.37e-09	5.33e-07
	intracellular non-membrane-bounded organelle (GO:0043232)	1574	21	59.6	-	0.35	4.37e-09	5.87e-07
	cellular_component (GO:0005575)	10873	358	411.74	-	0.87	9.71e-08	1e-05
	Unclassified (UNCLASSIFIED)	2938	165	111.26	+	1.48	9.71e-08	1.09e-05
	catalytic complex (GO:1902494)	984	12	37.26	-	0.32	1.78e-06	0.000171
	cytoplasm (GO:0005737)	4433	118	167.87	-	0.7	2.56e-06	0.000229
	ribonucleoprotein complex (GO:1990904)	564	4	21.36	-	0.19	1.02e-05	0.000855
	intracellular organelle lumen (GO:0070013)	1001	14	37.91	-	0.37	1.16e-05	0.000916
	membrane-enclosed lumen (GO:0031974)	1002	15	37.94	-	0.4	2.73e-05	0.00193
	organelle lumen (GO:0043233)	1002	15	37.94	-	0.4	2.73e-05	0.00203
	chromosome (GO:0005694)	574	5	21.74	-	0.23	3.56e-05	0.00239
	nuclear protein-containing complex (GO:0140513)	830	11	31.43	-	0.35	3.9e-05	0.00249
	mitochondrial protein-containing complex (GO:0098798)	258	0	9.77	-	< 0.01	0.000136	0.00832
	nuclear lumen (GO:0031981)	812	13	30.75	-	0.42	0.000514	0.03
	intracellular protein-containing complex (GO:0140535)	520	6	19.69	-	0.3	0.000539	0.0301
	cell surface (GO:0009986)	69	10	2.61	+	3.83	0.000576	0.0309
PANTHER Protein Class	hydrolase (PC00121)	384	39	14.54	+	2.68	1.01e-07	1.89e-05
	metalloprotease (PC00153)	148	22	5.6	+	3.93	2.48e-07	2.32e-05
	protease (PC00190)	501	44	18.97	+	2.32	9.31e-07	5.8e-05
	metabolite interconversion enzyme (PC00262)	1529	91	57.9	+	1.57	2.22e-05	0.00104
	nucleic acid metabolism protein (PC00171)	616	6	23.33	-	0.26	4.1e-05	0.00153
	gene-specific transcriptional regulator (PC00264)	589	6	22.3	-	0.27	7.85e-05	0.00245
	oxygenase (PC00177)	109	14	4.13	+	3.39	0.000156	0.00417
	DNA-binding transcription factor (PC00218)	556	6	21.05	-	0.28	0.000208	0.00485
	translational protein (PC00263)	314	2	11.89	-	0.17	0.00119	0.0247
	lipase (PC00143)	78	10	2.95	+	3.39	0.00135	0.0252
	serine protease (PC00203)	203	18	7.69	+	2.34	0.00151	0.0257
	RNA metabolism protein (PC00031)	475	6	17.99	-	0.33	0.00186	0.0289
	zinc finger transcription factor (PC00244)	233	1	8.82	-	0.11	0.00252	0.0363
	ribosomal protein (PC00202)	172	0	6.51	-	< 0.01	0.00321	0.0428
Reactome Pathways	Metabolism of RNA (R-DME-8953854)	485	4	18.37	-	0.22	0.000115	0.0408
	Gene expression (Transcription) (R-DME-74160)	537	4	20.34	-	0.2	3.06e-05	0.0433

## Sheet: F. Both Sexes LxT Enrichment
Gene Ontology Category	Gene Ontology Term	Number Genes in Genome	Number Genes in List	Expected Number in List	Over (+) or Under (-) Represented	Fold Enrichment	P-value	FDR
Biological Processes	regulation of cellular process (GO:0050794)	3662	24	65.49	-	0.37	1.07e-10	8.31e-07
	regulation of biological process (GO:0050789)	3924	29	70.18	-	0.41	4.97e-10	1.93e-06
	cellular process (GO:0009987)	7284	82	130.27	-	0.63	1e-09	2.61e-06
	cellular macromolecule metabolic process (GO:0044260)	2199	9	39.33	-	0.23	1.69e-09	3.28e-06
	biological regulation (GO:0065007)	4362	37	78.01	-	0.47	3.96e-09	6.16e-06
	cellular protein metabolic process (GO:0044267)	1664	5	29.76	-	0.17	1.4e-08	1.82e-05
	regulation of primary metabolic process (GO:0080090)	1825	8	32.64	-	0.25	1.61e-07	0.000179
	regulation of nucleobase-containing compound metabolic process (GO:0019219)	1358	4	24.29	-	0.16	3.71e-07	0.000361
	regulation of macromolecule biosynthetic process (GO:0010556)	1356	4	24.25	-	0.16	5.71e-07	0.000404
	regulation of cellular macromolecule biosynthetic process (GO:2000112)	1351	4	24.16	-	0.17	5.57e-07	0.000433
	organelle organization (GO:0006996)	1761	8	31.49	-	0.25	5.03e-07	0.000435
	regulation of RNA metabolic process (GO:0051252)	1316	4	23.54	-	0.17	7.99e-07	0.000518
	macromolecule modification (GO:0043412)	1216	3	21.75	-	0.14	9.07e-07	0.000543
	regulation of macromolecule metabolic process (GO:0060255)	1978	11	35.38	-	0.31	1.16e-06	0.000642
	antibacterial humoral response (GO:0019731)	26	7	0.46	+	15.05	1.37e-06	0.000713
	cellular localization (GO:0051641)	1004	2	17.96	-	0.11	4.22e-06	0.00149
	regulation of gene expression (GO:0010468)	1618	8	28.94	-	0.28	4.42e-06	0.0015
	humoral immune response (GO:0006959)	46	8	0.82	+	9.72	4.2e-06	0.00156
	regulation of nitrogen compound metabolic process (GO:0051171)	1796	10	32.12	-	0.31	3.23e-06	0.00157
	gene expression (GO:0010467)	1118	3	19.99	-	0.15	4.13e-06	0.00161
	regulation of metabolic process (GO:0019222)	2138	14	38.24	-	0.37	4.12e-06	0.00169
	antimicrobial humoral response (GO:0019730)	33	7	0.59	+	11.86	5.4e-06	0.00175
	cellular protein modification process (GO:0006464)	1117	3	19.98	-	0.15	4.11e-06	0.00178
	cellular component organization or biogenesis (GO:0071840)	2795	23	49.99	-	0.46	5.87e-06	0.00183
	protein modification process (GO:0036211)	1117	3	19.98	-	0.15	4.11e-06	0.00188
	regulation of nucleic acid-templated transcription (GO:1903506)	1167	4	20.87	-	0.19	1.16e-05	0.00321
	RNA metabolic process (GO:0016070)	819	1	14.65	-	0.07	1.22e-05	0.00328
	regulation of transcription, DNA-templated (GO:0006355)	1167	4	20.87	-	0.19	1.16e-05	0.00333
	regulation of RNA biosynthetic process (GO:2001141)	1167	4	20.87	-	0.19	1.16e-05	0.00346
	regulation of cellular metabolic process (GO:0031323)	1953	13	34.93	-	0.37	1.64e-05	0.00425
	cellular component organization (GO:0016043)	2640	22	47.21	-	0.47	1.71e-05	0.0043
	regulation of cellular biosynthetic process (GO:0031326)	1408	7	25.18	-	0.28	2.38e-05	0.0058
	cellular component biogenesis (GO:0044085)	1200	5	21.46	-	0.23	2.75e-05	0.00648
	nucleic acid metabolic process (GO:0090304)	1077	4	19.26	-	0.21	5.05e-05	0.0116
	reproductive process (GO:0022414)	1150	5	20.57	-	0.24	5.57e-05	0.0124
	cellular macromolecule localization (GO:0070727)	579	0	10.36	-	< 0.01	5.98e-05	0.0129
	regulation of biosynthetic process (GO:0009889)	1416	8	25.32	-	0.32	6.73e-05	0.0138
	heterocycle metabolic process (GO:0046483)	1415	8	25.31	-	0.32	6.72e-05	0.0141
	response to biotic stimulus (GO:0009607)	381	19	6.81	+	2.79	8.53e-05	0.0154
	chromosome organization (GO:0051276)	555	0	9.93	-	< 0.01	8.87e-05	0.0157
	response to other organism (GO:0051707)	381	19	6.81	+	2.79	8.53e-05	0.0158
	mannose metabolic process (GO:0006013)	10	4	0.18	+	22.37	8.11e-05	0.0162
	response to external biotic stimulus (GO:0043207)	381	19	6.81	+	2.79	8.53e-05	0.0162
	multi-organism process (GO:0051704)	1016	4	18.17	-	0.22	9.83e-05	0.0163
	defense response (GO:0006952)	348	18	6.22	+	2.89	8.46e-05	0.0165
	sexual reproduction (GO:0019953)	1015	4	18.15	-	0.22	9.81e-05	0.0166
	cellular component assembly (GO:0022607)	1029	4	18.4	-	0.22	0.000102	0.0166
	multi-organism reproductive process (GO:0044703)	1015	4	18.15	-	0.22	9.81e-05	0.017
	cellular protein localization (GO:0034613)	525	0	9.39	-	< 0.01	0.000129	0.0194
	establishment of localization in cell (GO:0051649)	796	2	14.24	-	0.14	0.000129	0.0197
	protein localization (GO:0008104)	679	1	12.14	-	0.08	0.000124	0.0197
	defense response to other organism (GO:0098542)	330	17	5.9	+	2.88	0.00014	0.0198
	response to external stimulus (GO:0009605)	902	33	16.13	+	2.05	0.000137	0.0198
	triglyceride metabolic process (GO:0006641)	24	5	0.43	+	11.65	0.000135	0.0199
	cellular metabolic process (GO:0044237)	3832	42	68.53	-	0.61	0.000129	0.02
	multicellular organismal reproductive process (GO:0048609)	1006	4	17.99	-	0.22	0.000146	0.0203
	gamete generation (GO:0007276)	885	3	15.83	-	0.19	0.000168	0.023
	organic cyclic compound metabolic process (GO:1901360)	1519	10	27.17	-	0.37	0.000175	0.0235
	nucleobase-containing compound metabolic process (GO:0006139)	1337	8	23.91	-	0.33	0.00018	0.0237
	biological process involved in interspecies interaction between organisms (GO:0044419)	406	19	7.26	+	2.62	0.000187	0.0243
	cellular developmental process (GO:0048869)	1568	11	28.04	-	0.39	0.000226	0.0288
	positive regulation of cellular process (GO:0048522)	1587	11	28.38	-	0.39	0.000232	0.0292
	developmental process involved in reproduction (GO:0003006)	863	3	15.43	-	0.19	0.000242	0.0299
	proteolysis (GO:0006508)	849	31	15.18	+	2.04	0.000261	0.0317
	regulation of cellular component organization (GO:0051128)	740	2	13.23	-	0.15	0.000265	0.0318
	cell differentiation (GO:0030154)	1554	11	27.79	-	0.4	0.00031	0.0365
	cellular aromatic compound metabolic process (GO:0006725)	1460	10	26.11	-	0.38	0.000323	0.0375
	immune response (GO:0006955)	360	17	6.44	+	2.64	0.00037	0.0423
Molecular Function	hydrolase activity (GO:0016787)	1571	68	28.1	+	2.42	6.55e-12	1.88e-08
	nucleic acid binding (GO:0003676)	1691	6	30.24	-	0.2	5.71e-08	8.2e-05
	peptidase activity (GO:0008233)	514	29	9.19	+	3.15	9.52e-08	9.12e-05
	hydrolase activity, hydrolyzing O-glycosyl compounds (GO:0004553)	84	11	1.5	+	7.32	8.39e-07	0.000482
	serine hydrolase activity (GO:0017171)	321	21	5.74	+	3.66	6.78e-07	0.000487
	endopeptidase activity (GO:0004175)	376	22	6.72	+	3.27	2.11e-06	0.00101
	hydrolase activity, acting on glycosyl bonds (GO:0016798)	95	11	1.7	+	6.47	2.52e-06	0.00103
	serine-type endopeptidase activity (GO:0004252)	240	17	4.29	+	3.96	2.99e-06	0.00108
	carbohydrate binding (GO:0030246)	121	12	2.16	+	5.55	3.88e-06	0.00124
	serine-type peptidase activity (GO:0008236)	260	17	4.65	+	3.66	8.15e-06	0.00234
	alkaline phosphata+B70:I90se activity (GO:0004035)	13	5	0.23	+	21.51	1.14e-05	0.00299
	catalytic activity (GO:0003824)	3791	100	67.8	+	1.47	1.45e-05	0.00347
	protein binding (GO:0005515)	2290	18	40.96	-	0.44	2.74e-05	0.00525
	heterocyclic compound binding (GO:1901363)	2668	23	47.72	-	0.48	2.73e-05	0.0056
	peptidoglycan binding (GO:0042834)	16	5	0.29	+	17.47	2.6e-05	0.00575
	DNA binding (GO:0003677)	936	3	16.74	-	0.18	8.29e-05	0.0149
	chitin binding (GO:0008061)	123	10	2.2	+	4.55	0.000119	0.019
	organic cyclic compound binding (GO:0097159)	2689	25	48.09	-	0.52	0.000118	0.0199
	iron ion binding (GO:0005506)	153	11	2.74	+	4.02	0.000152	0.023
	alpha-mannosidase activity (GO:0004559)	14	4	0.25	+	15.98	0.000234	0.0337
	mannosidase activity (GO:0015923)	15	4	0.27	+	14.91	0.000293	0.0401
Cellular Component	intracellular organelle (GO:0043229)	5451	37	97.49	-	0.38	1.15e-16	1.54e-13
	organelle (GO:0043226)	5549	39	99.24	-	0.39	2.62e-16	1.76e-13
	intracellular anatomical structure (GO:0005622)	6531	55	116.8	-	0.47	1.08e-15	4.85e-13
	intracellular membrane-bounded organelle (GO:0043231)	4825	33	86.29	-	0.38	3.69e-14	1.24e-11
	membrane-bounded organelle (GO:0043227)	5019	37	89.76	-	0.41	1.86e-13	4.99e-11
	nucleus (GO:0005634)	2763	11	49.41	-	0.22	3.92e-12	8.76e-10
	Unclassified (UNCLASSIFIED)	2938	98	52.54	+	1.87	1.16e-10	1.95e-08
	cellular_component (GO:0005575)	10873	149	194.46	-	0.77	1.16e-10	2.23e-08
	protein-containing complex (GO:0032991)	2708	13	48.43	-	0.27	1.82e-10	2.44e-08
	extracellular region (GO:0005576)	1031	50	18.44	+	2.71	1.75e-10	2.6e-08
	extracellular space (GO:0005615)	683	36	12.21	+	2.95	1.23e-08	1.5e-06
	non-membrane-bounded organelle (GO:0043228)	1574	7	28.15	-	0.25	1.98e-06	0.000204
	intracellular non-membrane-bounded organelle (GO:0043232)	1574	7	28.15	-	0.25	1.98e-06	0.000221
	intracellular organelle lumen (GO:0070013)	1001	2	17.9	-	0.11	4.16e-06	0.000398
	catalytic complex (GO:1902494)	984	2	17.6	-	0.11	6.33e-06	0.000567
	nuclear protein-containing complex (GO:0140513)	830	1	14.84	-	0.07	7.79e-06	0.000653
	nuclear lumen (GO:0031981)	812	1	14.52	-	0.07	1.18e-05	0.000928
	cytoplasm (GO:0005737)	4433	48	79.28	-	0.61	1.27e-05	0.000948
	membrane-enclosed lumen (GO:0031974)	1002	3	17.92	-	0.17	2.71e-05	0.00182
	organelle lumen (GO:0043233)	1002	3	17.92	-	0.17	2.71e-05	0.00191
	ribonucleoprotein complex (GO:1990904)	564	0	10.09	-	< 0.01	5.75e-05	0.00368
	cellular anatomical entity (GO:0110165)	9084	132	162.46	-	0.81	8.25e-05	0.00503
	mitochondrion (GO:0005739)	854	3	15.27	-	0.2	0.000238	0.0139
	cell surface (GO:0009986)	69	7	1.23	+	5.67	0.00037	0.0207
	lysosome (GO:0005764)	105	8	1.88	+	4.26	0.000849	0.0456
	lytic vacuole (GO:0000323)	106	8	1.9	+	4.22	0.0009	0.0464
PANTHER Protein Class	hydrolase (PC00121)	384	28	6.87	+	4.08	8.79e-10	1.64e-07
	metabolite interconversion enzyme (PC00262)	1529	53	27.35	+	1.94	3.34e-06	0.000312
	nucleic acid metabolism protein (PC00171)	616	0	11.02	-	< 0.01	2.57e-05	0.0016
	metalloprotease (PC00153)	148	11	2.65	+	4.16	0.000116	0.00541
	oxygenase (PC00177)	109	9	1.95	+	4.62	0.000234	0.00873
	RNA metabolism protein (PC00031)	475	0	8.5	-	< 0.01	0.00047	0.0126
	protease (PC00190)	501	21	8.96	+	2.34	0.000444	0.0138
	lipase (PC00143)	78	7	1.39	+	5.02	0.000731	0.0171
Reactome Pathways	Glycerophospholipid biosynthesis (R-DME-1483206)	105	11	1.88	+	5.86	6.11e-06	0.00865
	Lysosomal oligosaccharide catabolism (R-DME-8853383)	7	4	0.13	+	31.95	2.79e-05	0.00986
	Digestion and absorption (R-DME-8963743)	43	7	0.77	+	9.1	2.49e-05	0.0118
	Synthesis of PA (R-DME-1483166)	59	8	1.06	+	7.58	2.16e-05	0.0153
	Phospholipid metabolism (R-DME-1483257)	137	11	2.45	+	4.49	6.06e-05	0.0172
	Metabolism of lipids (R-DME-556833)	416	20	7.44	+	2.69	8.95e-05	0.0181
	Antimicrobial peptides (R-DME-6803157)	23	5	0.41	+	12.16	0.000114	0.0201
	Digestion (R-DME-8935690)	36	6	0.64	+	9.32	8.55e-05	0.0202
	Metabolism of RNA (R-DME-8953854)	485	0	8.67	-	< 0.01	0.000293	0.046

## Sheet: G. Female-Specific LxT Enrich
Gene Ontology Category	Gene Ontology Term	Number Genes in Genome	Number Genes in List	Expected Number in List	Over (+) or Under (-) Represented	Fold Enrichment	P-value	FDR
Biological Process	cellular macromolecule metabolic process (GO:0044260)	2199	17	69.1	-	0.25	8.82e-15	6.86e-11
	macromolecule biosynthetic process (GO:0009059)	770	0	24.2	-	< 0.01	3.83e-11	1.49e-07
	cellular macromolecule biosynthetic process (GO:0034645)	751	0	23.6	-	< 0.01	9.26e-11	2.4e-07
	cellular protein metabolic process (GO:0044267)	1664	14	52.29	-	0.27	1.76e-10	3.42e-07
	nucleic acid metabolic process (GO:0090304)	1077	5	33.84	-	0.15	9.37e-10	1.46e-06
	cellular metabolic process (GO:0044237)	3832	71	120.42	-	0.59	5.19e-08	6.73e-05
	nucleobase-containing compound metabolic process (GO:0006139)	1337	14	42.01	-	0.33	4.55e-07	0.000442
	regulation of gene expression (GO:0010468)	1618	20	50.84	-	0.39	5.38e-07	0.000465
	organelle organization (GO:0006996)	1761	23	55.34	-	0.42	4.49e-07	0.000499
	regulation of macromolecule biosynthetic process (GO:0010556)	1356	15	42.61	-	0.35	8.65e-07	0.000561
	RNA metabolic process (GO:0016070)	819	5	25.74	-	0.19	1.05e-06	0.000583
	cellular nitrogen compound metabolic process (GO:0034641)	1768	24	55.56	-	0.43	1.02e-06	0.000608
	regulation of nucleobase-containing compound metabolic process (GO:0019219)	1358	15	42.67	-	0.35	8.62e-07	0.00061
	regulation of cellular macromolecule biosynthetic process (GO:2000112)	1351	15	42.45	-	0.35	1.19e-06	0.000619
	heterocycle metabolic process (GO:0046483)	1415	16	44.47	-	0.36	8.6e-07	0.00067
	regulation of RNA metabolic process (GO:0051252)	1316	15	41.35	-	0.36	2.21e-06	0.000819
	regulation of nitrogen compound metabolic process (GO:0051171)	1796	25	56.44	-	0.44	1.69e-06	0.000824
	regulation of nucleic acid-templated transcription (GO:1903506)	1167	12	36.67	-	0.33	2.21e-06	0.00086
	regulation of transcription, DNA-templated (GO:0006355)	1167	12	36.67	-	0.33	2.21e-06	0.000905
	regulation of RNA biosynthetic process (GO:2001141)	1167	12	36.67	-	0.33	2.21e-06	0.000955
	gene expression (GO:0010467)	1118	11	35.13	-	0.31	2.14e-06	0.000981
	macromolecule metabolic process (GO:0043170)	3165	60	99.46	-	0.6	3.74e-06	0.00132
	regulation of biosynthetic process (GO:0009889)	1416	18	44.5	-	0.4	6.8e-06	0.00203
	regulation of cellular biosynthetic process (GO:0031326)	1408	18	44.25	-	0.41	6.66e-06	0.00207
	chromosome organization (GO:0051276)	555	2	17.44	-	0.11	7.19e-06	0.00207
	regulation of macromolecule metabolic process (GO:0060255)	1978	31	62.16	-	0.5	6.46e-06	0.00209
	cellular aromatic compound metabolic process (GO:0006725)	1460	19	45.88	-	0.41	6.32e-06	0.00214
	intracellular transport (GO:0046907)	662	4	20.8	-	0.19	1.42e-05	0.00394
	regulation of metabolic process (GO:0019222)	2138	36	67.18	-	0.54	1.73e-05	0.00464
	establishment of protein localization (GO:0045184)	454	1	14.27	-	0.07	1.95e-05	0.00505
	regulation of cellular metabolic process (GO:0031323)	1953	32	61.37	-	0.52	2.16e-05	0.00543
	regulation of primary metabolic process (GO:0080090)	1825	29	57.35	-	0.51	2.36e-05	0.00573
	cellular protein modification process (GO:0006464)	1117	13	35.1	-	0.37	2.73e-05	0.00626
	protein modification process (GO:0036211)	1117	13	35.1	-	0.37	2.73e-05	0.00645
	intracellular protein transport (GO:0006886)	340	0	10.68	-	< 0.01	4e-05	0.00866
	positive regulation of nitrogen compound metabolic process (GO:0051173)	733	6	23.03	-	0.26	3.97e-05	0.00882
	protein transport (GO:0015031)	432	1	13.58	-	0.07	4.35e-05	0.00914
	macromolecule modification (GO:0043412)	1216	16	38.21	-	0.42	5.73e-05	0.0114
	organic cyclic compound metabolic process (GO:1901360)	1519	23	47.73	-	0.48	5.71e-05	0.0117
	cell cycle (GO:0007049)	599	4	18.82	-	0.21	8.21e-05	0.016
	positive regulation of biosynthetic process (GO:0009891)	536	3	16.84	-	0.18	9.38e-05	0.0166
	positive regulation of cellular metabolic process (GO:0031325)	815	8	25.61	-	0.31	9.03e-05	0.0167
	positive regulation of cellular biosynthetic process (GO:0031328)	536	3	16.84	-	0.18	9.38e-05	0.017
	cellular localization (GO:0051641)	1004	12	31.55	-	0.38	9e-05	0.0171
	positive regulation of metabolic process (GO:0009893)	893	10	28.06	-	0.36	0.000125	0.0216
	translation (GO:0006412)	305	0	9.58	-	< 0.01	0.000134	0.0227
	carbohydrate metabolic process (GO:0005975)	246	20	7.73	+	2.59	0.000193	0.0319
	carboxylic acid biosynthetic process (GO:0046394)	120	13	3.77	+	3.45	0.000211	0.0334
	organic acid biosynthetic process (GO:0016053)	120	13	3.77	+	3.45	0.000211	0.0341
	G protein-coupled receptor signaling pathway (GO:0007186)	213	18	6.69	+	2.69	0.000258	0.0402
	positive regulation of macromolecule biosynthetic process (GO:0010557)	493	3	15.49	-	0.19	0.000264	0.0403
	positive regulation of nucleobase-containing compound metabolic process (GO:0045935)	498	3	15.65	-	0.19	0.000272	0.0407
	DNA metabolic process (GO:0006259)	281	0	8.83	-	< 0.01	0.0003	0.044
Molecular Function	nucleic acid binding (GO:0003676)	1691	21	53.14	-	0.4	3.85e-07	0.00111
	serine hydrolase activity (GO:0017171)	321	29	10.09	+	2.87	1.07e-06	0.00154
	hydrolase activity (GO:0016787)	1571	84	49.37	+	1.7	1.97e-06	0.00188
	alpha-1,4-glucosidase activity (GO:0004558)	10	6	0.31	+	19.09	4.77e-06	0.00274
	maltose alpha-glucosidase activity (GO:0032450)	10	6	0.31	+	19.09	4.77e-06	0.00343
	alpha-glucosidase activity (GO:0090599)	12	6	0.38	+	15.91	1.05e-05	0.00503
	glucosidase activity (GO:0015926)	16	6	0.5	+	11.93	3.81e-05	0.0156
	signaling receptor binding (GO:0005102)	262	22	8.23	+	2.67	6.01e-05	0.0192
	serine-type peptidase activity (GO:0008236)	260	22	8.17	+	2.69	5.41e-05	0.0194
	hydrolase activity, hydrolyzing O-glycosyl compounds (GO:0004553)	84	11	2.64	+	4.17	0.000144	0.0415
Cellular Component	organelle (GO:0043226)	5549	90	174.37	-	0.52	2.21e-17	1.49e-14
	intracellular organelle (GO:0043229)	5451	87	171.29	-	0.51	1.68e-17	2.26e-14
	membrane-bounded organelle (GO:0043227)	5019	78	157.72	-	0.49	1.69e-16	7.55e-14
	intracellular membrane-bounded organelle (GO:0043231)	4825	74	151.62	-	0.49	5.04e-16	1.69e-13
	intracellular anatomical structure (GO:0005622)	6531	123	205.23	-	0.6	2.67e-15	7.15e-13
	nucleus (GO:0005634)	2763	33	86.83	-	0.38	2.13e-12	4.77e-10
	protein-containing complex (GO:0032991)	2708	36	85.1	-	0.42	1.83e-10	3.51e-08
	extracellular region (GO:0005576)	1031	70	32.4	+	2.16	2.71e-09	4.55e-07
	catalytic complex (GO:1902494)	984	7	30.92	-	0.23	3.95e-07	5.89e-05
	nuclear protein-containing complex (GO:0140513)	830	5	26.08	-	0.19	7.34e-07	9.85e-05
	non-membrane-bounded organelle (GO:0043228)	1574	20	49.46	-	0.4	1.34e-06	0.00015
	intracellular non-membrane-bounded organelle (GO:0043232)	1574	20	49.46	-	0.4	1.34e-06	0.000163
	extracellular space (GO:0005615)	683	46	21.46	+	2.14	3.64e-06	0.000376
	transferase complex (GO:1990234)	482	1	15.15	-	0.07	9.23e-06	0.000885
	cytoplasm (GO:0005737)	4433	97	139.3	-	0.7	1.3e-05	0.00116
	cellular_component (GO:0005575)	10873	303	341.68	-	0.89	1.83e-05	0.00145
	Unclassified (UNCLASSIFIED)	2938	131	92.32	+	1.42	1.83e-05	0.00154
	intracellular protein-containing complex (GO:0140535)	520	2	16.34	-	0.12	2.22e-05	0.00166
	chromosome (GO:0005694)	574	3	18.04	-	0.17	3.19e-05	0.00226
	intracellular organelle lumen (GO:0070013)	1001	12	31.46	-	0.38	8.99e-05	0.00524
	membrane-enclosed lumen (GO:0031974)	1002	12	31.49	-	0.38	8.99e-05	0.00548
	organelle lumen (GO:0043233)	1002	12	31.49	-	0.38	8.99e-05	0.00574
	nuclear lumen (GO:0031981)	812	8	25.52	-	0.31	8.91e-05	0.00598
	cell periphery (GO:0071944)	1820	84	57.19	+	1.47	0.00042	0.0235
	intrinsic component of plasma membrane (GO:0031226)	521	32	16.37	+	1.95	0.000538	0.0289
	egg chorion (GO:0042600)	41	7	1.29	+	5.43	0.00058	0.03
	organelle envelope (GO:0031967)	451	3	14.17	-	0.21	0.000741	0.0332
	mitochondrion (GO:0005739)	854	11	26.84	-	0.41	0.000708	0.0339
	ribonucleoprotein complex (GO:1990904)	564	5	17.72	-	0.28	0.000686	0.0341
	envelope (GO:0031975)	451	3	14.17	-	0.21	0.000741	0.0343
Protein Class	amylase (PC00048)	15	8	0.47	+	16.97	2.28e-07	4.27e-05
	nucleic acid metabolism protein (PC00171)	616	3	19.36	-	0.15	1.1e-05	0.000515
	hydrolase (PC00121)	384	31	12.07	+	2.57	6.24e-06	0.000583
	metabolite interconversion enzyme (PC00262)	1529	80	48.05	+	1.67	9.51e-06	0.000593
	RNA metabolism protein (PC00031)	475	3	14.93	-	0.2	0.000371	0.0139
Reactome Pathways	Regulation of insulin secretion (R-DME-422356)	37	9	1.16	+	7.74	8.42e-06	0.0119
	Integration of energy metabolism (R-DME-163685)	47	9	1.48	+	6.09	4.42e-05	0.0209
	Digestion and absorption (R-DME-8963743)	43	8	1.35	+	5.92	0.00014	0.0397
	RNA Polymerase II Transcription (R-DME-73857)	463	2	14.55	-	0.14	9.58e-05	0.0339
	Gene expression (Transcription) (R-DME-74160)	537	2	16.87	-	0.12	1.58e-05	0.0112

## Sheet: H. Male-Specific LxT Enrichment
Gene Ontology Category	Gene Ontology Term	Number Genes in Genome	Number Genes in List	Expected Number in List	Over (+) or Under (-) Represented	Fold Enrichment	P-value	FDR
Biological Process	response to bacterium (GO:0009617)	226	19	4.52	+	4.21	3.6e-07	0.0014
	defense response to bacterium (GO:0042742)	197	18	3.94	+	4.57	2.37e-07	0.00185
	response to biotic stimulus (GO:0009607)	381	23	7.61	+	3.02	4.78e-06	0.00743
	defense response to other organism (GO:0098542)	330	21	6.59	+	3.18	5.86e-06	0.0076
	response to other organism (GO:0051707)	381	23	7.61	+	3.02	4.78e-06	0.00929
	biological process involved in interspecies interaction between organisms (GO:0044419)	406	23	8.11	+	2.83	1.27e-05	0.011
	defense response to Gram-positive bacterium (GO:0050830)	47	8	0.94	+	8.52	1.08e-05	0.012
	defense response (GO:0006952)	348	21	6.95	+	3.02	1.26e-05	0.0122
	response to external biotic stimulus (GO:0043207)	381	23	7.61	+	3.02	4.78e-06	0.0124
	immune response (GO:0006955)	360	21	7.19	+	2.92	2.03e-05	0.0158
	peptide catabolic process (GO:0043171)	29	6	0.58	+	10.35	5.39e-05	0.0381
	defense response to Gram-negative bacterium (GO:0050829)	103	10	2.06	+	4.86	7.45e-05	0.0446
	humoral immune response (GO:0006959)	46	7	0.92	+	7.61	7.32e-05	0.0475
Molecular Function	hydrolase activity (GO:0016787)	1571	58	31.39	+	1.85	5.86e-06	0.0168
	peptidase activity (GO:0008233)	514	26	10.27	+	2.53	2.26e-05	0.0325
Cellular Component	protein-containing complex (GO:0032991)	2708	22	54.12	-	0.41	1.84e-07	0.000246
	organelle (GO:0043226)	5549	76	110.89	-	0.69	1.69e-05	0.00566
	intracellular organelle (GO:0043229)	5451	73	108.93	-	0.67	8.8e-06	0.00591
	intracellular anatomical structure (GO:0005622)	6531	94	130.52	-	0.72	1.38e-05	0.00619
	membrane-bounded organelle (GO:0043227)	5019	69	100.3	-	0.69	8.17e-05	0.0219
	nucleus (GO:0005634)	2763	31	55.22	-	0.56	0.000172	0.0384
	intracellular membrane-bounded organelle (GO:0043231)	4825	67	96.42	-	0.69	0.000201	0.0385
PANTHER Protein Class	metalloprotease (PC00153)	148	11	2.96	+	3.72	0.000298	0.0279
	protease (PC00190)	501	23	10.01	+	2.3	0.000292	0.0546

## Sheet: I. Human Orthologs
Significant Sex	FlyBase Gene ID	Fly Gene Symbol	Human Species Gene ID	Human Gene Symbol	DIOPT Score	Rank	Prediction Derived From
Both Sexes	FBgn0033246	ACC	84	ACACA	14	high	eggNOG, Hieranoid, Homologene, Inparanoid, Isobase, OMA, OrthoDB, OrthoFinder, OrthoInspector, orthoMCL, Panther, Phylome, RoundUp, TreeFam
	FBgn0033246	ACC	85	ACACB	13	moderate	Compara, eggNOG, Hieranoid, Inparanoid, OMA, OrthoDB, OrthoFinder, OrthoInspector, orthoMCL, Panther, Phylome, RoundUp, TreeFam
	FBgn0020508	Ag5r2	28392	GLIPR1L1	4	moderate	Compara, eggNOG, Inparanoid, OrthoDB
	FBgn0020508	Ag5r2	16904	CRISP3	3	low	Compara, OrthoDB, Panther
	FBgn0020508	Ag5r2	12024	CRISP2	3	low	eggNOG, OrthoDB, Panther
	FBgn0020508	Ag5r2	304	CRISP1	3	low	eggNOG, OrthoDB, Panther
	FBgn0020508	Ag5r2	21245	PI16	3	low	eggNOG, OrthoDB, Panther
	FBgn0020508	Ag5r2	33849	CLEC18B	3	low	eggNOG, OrthoDB, Panther
	FBgn0020508	Ag5r2	30388	CLEC18A	3	low	eggNOG, OrthoDB, Panther
	FBgn0020508	Ag5r2	8946	PI15	3	low	eggNOG, Inparanoid, OrthoDB
	FBgn0020508	Ag5r2	16249	R3HDML	3	low	eggNOG, Inparanoid, OrthoDB
	FBgn0020508	Ag5r2	28592	GLIPR1L2	2	low	eggNOG, OrthoDB
	FBgn0020508	Ag5r2	17001	GLIPR1	2	low	eggNOG, OrthoDB
	FBgn0020508	Ag5r2	18007	GLIPR2	2	low	eggNOG, OrthoDB
	FBgn0020508	Ag5r2	18206	CRISPLD1	2	low	eggNOG, OrthoDB
	FBgn0020508	Ag5r2	25248	CRISPLD2	2	low	eggNOG, OrthoDB
	FBgn0016123	Alp4	439	ALPP	7	moderate	Compara, eggNOG, Homologene, OrthoFinder, orthoMCL, Panther, Phylome
	FBgn0016123	Alp4	441	ALPG	6	moderate	Compara, eggNOG, OrthoFinder, orthoMCL, Panther, Phylome
	FBgn0016123	Alp4	437	ALPI	6	moderate	Compara, eggNOG, OrthoFinder, orthoMCL, Panther, Phylome
	FBgn0016123	Alp4	438	ALPL	6	moderate	Compara, eggNOG, OrthoFinder, orthoMCL, Panther, Phylome
	FBgn0015568	alpha-Est1	26741	CES4A	5	moderate	Compara, eggNOG, Hieranoid, OrthoDB, OrthoFinder
	FBgn0015568	alpha-Est1	1863	CES1	5	moderate	Compara, eggNOG, Hieranoid, OrthoDB, OrthoFinder
	FBgn0015568	alpha-Est1	1864	CES2	5	moderate	Compara, eggNOG, Hieranoid, OrthoDB, OrthoFinder
	FBgn0015568	alpha-Est1	26459	CES5A	5	moderate	Compara, eggNOG, Hieranoid, OrthoDB, OrthoFinder
	FBgn0015568	alpha-Est1	1865	CES3	5	moderate	Compara, eggNOG, Hieranoid, OrthoDB, OrthoFinder
	FBgn0015568	alpha-Est1	108	ACHE	5	moderate	Compara, eggNOG, Isobase, OrthoDB, OrthoFinder
	FBgn0015568	alpha-Est1	-	LOC107987423	2	moderate	OrthoDB, OrthoFinder
	FBgn0015568	alpha-Est1	983	BCHE	3	low	eggNOG, OrthoDB, OrthoFinder
	FBgn0015568	alpha-Est1	14287	NLGN4X	3	low	Compara, eggNOG, OrthoDB
	FBgn0015568	alpha-Est1	1848	CEL	3	low	Compara, eggNOG, OrthoDB
	FBgn0015568	alpha-Est1	14291	NLGN1	3	low	Compara, eggNOG, OrthoDB
	FBgn0015568	alpha-Est1	14290	NLGN2	3	low	Compara, eggNOG, OrthoDB
	FBgn0015568	alpha-Est1	11764	TG	3	low	Compara, eggNOG, OrthoDB
	FBgn0015568	alpha-Est1	14289	NLGN3	3	low	Compara, eggNOG, OrthoDB
	FBgn0015568	alpha-Est1	15529	NLGN4Y	2	low	Compara, OrthoDB
	FBgn0015575	alpha-Est7	1865	CES3	6	high	Compara, eggNOG, Hieranoid, OMA, OrthoDB, OrthoFinder
	FBgn0015575	alpha-Est7	26741	CES4A	5	moderate	Compara, eggNOG, Hieranoid, OrthoDB, OrthoFinder
	FBgn0015575	alpha-Est7	1863	CES1	5	moderate	Compara, eggNOG, Hieranoid, OrthoDB, OrthoFinder
	FBgn0015575	alpha-Est7	1864	CES2	5	moderate	Compara, eggNOG, Hieranoid, OrthoDB, OrthoFinder
	FBgn0015575	alpha-Est7	26459	CES5A	5	moderate	Compara, eggNOG, Hieranoid, OrthoDB, OrthoFinder
	FBgn0015575	alpha-Est7	108	ACHE	4	moderate	Compara, eggNOG, OrthoDB, OrthoFinder
	FBgn0015575	alpha-Est7	-	LOC107987423	2	moderate	OrthoDB, OrthoFinder
	FBgn0015575	alpha-Est7	983	BCHE	3	low	eggNOG, OrthoDB, OrthoFinder
	FBgn0015575	alpha-Est7	14287	NLGN4X	3	low	Compara, eggNOG, OrthoDB
	FBgn0015575	alpha-Est7	1848	CEL	3	low	Compara, eggNOG, OrthoDB
	FBgn0015575	alpha-Est7	14291	NLGN1	3	low	Compara, eggNOG, OrthoDB
	FBgn0015575	alpha-Est7	14290	NLGN2	3	low	Compara, eggNOG, OrthoDB
	FBgn0015575	alpha-Est7	11764	TG	3	low	Compara, eggNOG, OrthoDB
	FBgn0015575	alpha-Est7	14289	NLGN3	3	low	Compara, eggNOG, OrthoDB
	FBgn0015575	alpha-Est7	15529	NLGN4Y	2	low	Compara, OrthoDB
	FBgn0000078	Amy-d	478	AMY2B	12	moderate	eggNOG, Hieranoid, Homologene, Inparanoid, OMA, OrthoDB, OrthoFinder, OrthoInspector, orthoMCL, Panther, RoundUp, TreeFam
	FBgn0000078	Amy-d	477	AMY2A	8	moderate	Hieranoid, Inparanoid, OMA, OrthoFinder, OrthoInspector, Panther, RoundUp, TreeFam
	FBgn0000078	Amy-d	476	AMY1C	8	moderate	eggNOG, Hieranoid, Inparanoid, OMA, OrthoFinder, OrthoInspector, orthoMCL, TreeFam
	FBgn0000078	Amy-d	474	AMY1A	6	moderate	eggNOG, OMA, OrthoFinder, orthoMCL, Panther, TreeFam
	FBgn0000078	Amy-d	475	AMY1B	6	moderate	eggNOG, Isobase, OMA, OrthoFinder, orthoMCL, TreeFam
	FBgn0033366	Ance-4	2707	ACE	4	moderate	eggNOG, OrthoDB, OrthoFinder, Panther
	FBgn0033366	Ance-4	13557	ACE2	3	low	eggNOG, OrthoFinder, Panther
	FBgn0033926	Arc1	648	ARC	2	high	OrthoFinder, Phylome
	FBgn0020762	Atet	13884	ABCG4	12	high	Compara, eggNOG, Hieranoid, Homologene, Inparanoid, Isobase, OMA, OrthoDB, OrthoFinder, Panther, Phylome, TreeFam
	FBgn0020762	Atet	73	ABCG1	10	moderate	Compara, eggNOG, Hieranoid, Inparanoid, OMA, OrthoDB, OrthoFinder, Panther, Phylome, TreeFam
	FBgn0020762	Atet	74	ABCG2	2	low	eggNOG, OrthoFinder
	FBgn0020762	Atet	13887	ABCG8	2	low	Compara, eggNOG
	FBgn0037989	ATP8B	13534	ATP8B2	12	high	Compara, eggNOG, Hieranoid, Homologene, Inparanoid, Isobase, OMA, OrthoDB, orthoMCL, Panther, Phylome, TreeFam
	FBgn0037989	ATP8B	13536	ATP8B4	9	moderate	eggNOG, Hieranoid, Inparanoid, OMA, OrthoDB, orthoMCL, Panther, Phylome, TreeFam
	FBgn0037989	ATP8B	3706	ATP8B1	8	moderate	Compara, eggNOG, Hieranoid, OrthoDB, orthoMCL, Panther, Phylome, TreeFam
	FBgn0037989	ATP8B	13535	ATP8B3	6	moderate	Compara, eggNOG, OrthoDB, orthoMCL, Panther, Phylome
	FBgn0037989	ATP8B	13554	ATP11C	4	moderate	Compara, eggNOG, OrthoDB, orthoMCL
	FBgn0037989	ATP8B	13552	ATP11A	4	moderate	Compara, eggNOG, OrthoDB, orthoMCL
	FBgn0037989	ATP8B	13543	ATP10B	3	low	Compara, eggNOG, OrthoDB
	FBgn0037989	ATP8B	13549	ATP10D	3	low	Compara, eggNOG, OrthoDB
	FBgn0037989	ATP8B	13531	ATP8A1	3	low	eggNOG, OrthoDB, orthoMCL
	FBgn0037989	ATP8B	13553	ATP11B	3	low	eggNOG, OrthoDB, orthoMCL
	FBgn0037989	ATP8B	13533	ATP8A2	3	low	eggNOG, OrthoDB, orthoMCL
	FBgn0037989	ATP8B	13540	ATP9A	2	low	Compara, OrthoDB
	FBgn0037989	ATP8B	13542	ATP10A	2	low	eggNOG, OrthoDB
	FBgn0031571	bark	13869	LOXL3	2	moderate	Isobase, RoundUp
	FBgn0028482	bdl	18132	IGSF9	6	moderate	eggNOG, OrthoDB, OrthoFinder, Panther, Phylome, TreeFam
	FBgn0028482	bdl	32326	IGSF9B	5	moderate	eggNOG, OrthoDB, OrthoFinder, Phylome, TreeFam
	FBgn0036449	bmm	30802	PNPLA2	12	high	eggNOG, Hieranoid, Inparanoid, Isobase, OrthoDB, OrthoFinder, OrthoInspector, orthoMCL, Panther, Phylome, RoundUp, TreeFam
	FBgn0036449	bmm	18590	PNPLA3	11	moderate	eggNOG, Hieranoid, Inparanoid, OrthoDB, OrthoFinder, OrthoInspector, orthoMCL, Panther, Phylome, RoundUp, TreeFam
	FBgn0036449	bmm	24888	PNPLA5	8	moderate	eggNOG, Inparanoid, OrthoDB, OrthoInspector, Panther, Phylome, RoundUp, TreeFam
	FBgn0036449	bmm	21246	PNPLA1	6	moderate	eggNOG, OrthoDB, Panther, Phylome, RoundUp, TreeFam
	FBgn0036449	bmm	24887	PNPLA4	2	moderate	eggNOG, OrthoDB
	FBgn0027844	CAH1	14914	CA13	10	high	eggNOG, Hieranoid, Inparanoid, OMA, OrthoDB, OrthoFinder, OrthoInspector, orthoMCL, Panther, RoundUp
	FBgn0027844	CAH1	1381	CA7	10	high	eggNOG, Hieranoid, Homologene, Inparanoid, OMA, OrthoFinder, OrthoInspector, Panther, Phylome, RoundUp
	FBgn0027844	CAH1	1373	CA2	10	high	Compara, eggNOG, Hieranoid, Inparanoid, Isobase, OMA, OrthoFinder, OrthoInspector, Panther, RoundUp
	FBgn0027844	CAH1	1378	CA5B	9	moderate	eggNOG, Hieranoid, Inparanoid, OrthoDB, OrthoFinder, OrthoInspector, Panther, Phylome, TreeFam
	FBgn0027844	CAH1	1374	CA3	8	moderate	eggNOG, Hieranoid, Inparanoid, OrthoDB, OrthoFinder, OrthoInspector, Panther, RoundUp
	FBgn0027844	CAH1	1368	CA1	8	moderate	eggNOG, Hieranoid, Inparanoid, OMA, OrthoDB, OrthoFinder, OrthoInspector, Panther
	FBgn0027844	CAH1	1377	CA5A	8	moderate	eggNOG, Hieranoid, Inparanoid, OrthoDB, OrthoInspector, Panther, Phylome, TreeFam
	FBgn0027844	CAH1	1375	CA4	3	low	eggNOG, OrthoDB, OrthoFinder
	FBgn0027844	CAH1	1370	CA11	2	low	eggNOG, OrthoDB
	FBgn0027844	CAH1	1371	CA12	2	low	eggNOG, OrthoDB
	FBgn0027844	CAH1	1372	CA14	2	low	eggNOG, OrthoDB
	FBgn0027844	CAH1	1380	CA6	2	low	eggNOG, OrthoDB
	FBgn0027844	CAH1	1369	CA10	2	low	eggNOG, OrthoDB
	FBgn0027844	CAH1	1383	CA9	2	low	eggNOG, OrthoDB
	FBgn0000277	CecA2
	FBgn0039091	CG10182	-	LOC112268211	2	high	OrthoDB, OrthoFinder
	FBgn0039312	CG10514
	FBgn0035619	Alp10	441	ALPG	10	moderate	Compara, eggNOG, Hieranoid, Inparanoid, OrthoDB, OrthoFinder, OrthoInspector, orthoMCL, Panther, Phylome
	FBgn0035619	Alp10	437	ALPI	10	moderate	Compara, eggNOG, Hieranoid, Inparanoid, OrthoDB, OrthoFinder, OrthoInspector, orthoMCL, Panther, Phylome
	FBgn0035619	Alp10	439	ALPP	10	moderate	Compara, eggNOG, Hieranoid, Inparanoid, OrthoDB, OrthoFinder, OrthoInspector, orthoMCL, Panther, Phylome
	FBgn0035619	Alp10	438	ALPL	10	moderate	Compara, eggNOG, Hieranoid, Inparanoid, OrthoDB, OrthoFinder, OrthoInspector, orthoMCL, Panther, Phylome
	FBgn0046302	CG10650
	FBgn0034289	CG10910
	FBgn0034295	CG10911	41983	NPIPA8	1	low	eggNOG
	FBgn0034295	CG10911	41978	NPIPA3	1	low	eggNOG
	FBgn0034295	CG10911	41979	NPIPA2	1	low	eggNOG
	FBgn0034295	CG10911	41980	NPIPA5	1	low	eggNOG
	FBgn0034295	CG10911	7909	NPIPA1	1	low	eggNOG
	FBgn0034295	CG10911	41982	NPIPA7	1	low	eggNOG
	FBgn0034295	CG10911	20125	AHNAK2	1	low	eggNOG
	FBgn0034296	CG10912
[truncated: 4,600 more rows]
