# Supplementary material for: Modulation of the Drosophila transcriptome by developmental exposure to alcohol
Source: BMC Genomics. 2022 May 6;23:347. doi: 10.1186/s12864-022-08559-9 (PMC9074282; doi:10.1186/s12864-022-08559-9)
Supplement: Supplementary file 7 — Additional file 7. Mixed model ANOVAs for sleep and activity phenotypes. Line, Sex, and Treatment are fixed effects, Replicate (Rep) is random. "df": degrees of freedom; "SS": Type III Sums of Squares; "MS": Mean square. [file 12864_2022_8559_MOESM7_ESM.xlsx]

## Sheet: Sheet1
Additional File 7. Mixed model ANOVAs for sleep and activity phenotypes. Line, Sex, and Treatment are fixed effects, Replicate (Rep) is random. "df": degrees of freedom; "SS": Type III Sums of Squares; "MS": Mean square.
Analysis	Source of Variation	df	SS	MS	F-value	P-value
Proportion of Daytime Asleep; Full Model	Line	5	58.1268	11.6254	154.08	<.0001
	Sex	1	7.15984	7.15984	95.54	<.0001
	Treatment	1	0.145712	0.145712	1.94	0.1766
	Line×Sex	5	2.72085	0.54417	7.21	0.0003
	Line×Treatment	5	1.00022	0.200044	2.65	0.0491
	Sex×Treatment	1	0.342631	0.342631	4.57	0.0433
	Line×Sex×Treatment	5	0.376924	0.075385	1	0.4402
	Rep(Line×Sex×Treatment)	23	1.74859	0.076026	4.91	<.0001
	Error	1367	21.1618	0.01548
Proportion of Daytime Asleep; by Sex - Females	Line	5	33.0675	6.6135	103.93	<.0001
	Treatment	7	0.016337	0.016337	0.26	0.6217
	Line×Treatment	5	0.805708	0.161142	2.53	0.0924
	Rep(Line×Treatment)	11	0.701734	0.063794	3.95	<.0001
	Error	663	10.6995	0.016138
Proportion of Daytime Asleep; by Sex - Males	Line	5	28.4594	5.69188	65.99	<.0001
	Treatment	1	0.475107	0.475107	5.57	0.0359
	Line×Treatment	5	0.553967	0.110793	1.28	0.3325
	Rep(Line×Treatment)	12	1.04685	0.087238	5.87	<.0001
	Error	704	10.4623	0.014861
Proportion of Nighttime Asleep; Full Model	Line	5	28.4722	5.69444	112.82	<.0001
	Sex	1	1.37554	1.37554	27.41	<0.0001
	Treatment	1	0.203982	0.203982	4.06	0.0556
	Line×Sex	5	0.868331	0.173666	3.44	0.0181
	Line×Treatment	5	0.867998	0.1736	3.44	0.0181
	Sex×Treatment	1	0.226307	0.226307	4.51	0.0446
	Line×Sex×Treatment	5	0.155268	0.031054	0.61	0.6894
	Rep(Line×Sex×Treatment)	23	1.1688	0.050817	3.41	<.0001
	Error	1367	20.3837	0.014911
Proportion of Nighttime Asleep; by Sex - Females	Line	5	11.2811	2.25623	34.2	0.9289
	Treatment	1	0.000548	0.000548	0.01	<.0001
	Line×Treatment	5	0.377901	0.07558	1.15	0.3932
	Rep(Line×Treatment)	11	0.72758	0.066144	4.7	<.0001
	Error	663	9.3334	0.014078
Proportion of Nighttime Asleep; by Sex - Males	Line	5	18.0095	3.60189	98.73	<.0001
	Treatment	1	0.444933	0.444933	12.29	0.0042
	Line×Treatment	5	0.635965	0.127193	3.49	0.0349
	Rep(Line×Treatment)	12	0.44122	0.036768	2.34	0.006
	Error	704	11.0503	0.015696
Sleep Bout Count, Day; Full Model	Line	5	9353.27	1870.65	35.92	<.0001
	Sex	1	46.5842	46.5842	0.9	0.3525
	Treatment	1	182.887	182.887	3.53	0.0728
	Line×Sex	5	1227.7	245.539	4.71	0.0041
	Line×Treatment	5	467.062	93.4123	1.79	0.1538
	Sex×Treatment	1	35.2944	35.2944	0.68	0.4173
	Line×Sex×Treatment	5	226.045	45.2089	0.87	0.5174
	Rep(Line×Sex×Treatment)	23	1206.92	52.4747	4.75	<.0001
	Error	1367	15101	11.0472
Sleep Bout Count, Day; by Sex - Females	Line	5	6884.34	1376.87	19.1	<.0001
	Treatment	1	172.024	172.024	2.4	0.1499
	Line×Treatment	5	363.808	72.7616	11.014	1.01
	Rep(Line×Treatment)	11	794.946	72.2678	5.06	<.0001
	Error	663	9470.74	14.2847
Sleep Bout Count, Day; by Sex - Males	Line	5	3704.11	740.821	21.81	<.0001
	Treatment	1	31.2205	31.2205	0.93	0.354
	Line×Treatment	5	308.015	61.603	1.81	0.1842
	Rep(Line×Treatment)	12	411.973	34.3311	4.29	<.0001
	Error	704	5630.75	7.99822
Sleep Bout Count, Night; Full Model	Line	5	15074	3014.71	202.16	<.0001
	Sex	1	31.6141	31.6141	2.13	0.1577
	Treatment	1	37.5885	37.5885	2.53	0.125
	Line×Sex	5	88.0429	17.6086	1.18	0.3487
	Line×Treatment	5	425.065	85.0129	5.7	0.0014
	Sex×Treatment	1	92.9615	92.9615	6.27	0.0198
	Line×Sex×Treatment	5	164.635	32.927	2.21	0.0881
	Rep(Line×Sex×Treatment)	23	345.06	15.0026	2.69	<.0001
	Error	1367	7616.12	5.57142
Sleep Bout Count, Night; by Sex - Females	Line	5	6764.38	1352.88	83.76	<.0001
	Treatment	1	121.473	121.473	7.54	0.0189
	Line×Treatment	5	315.842	63.1684	3.91	0.0277
	Rep(Line×Treatment)	11	178.054	16.1867	2.73	0.0018
	Error	663	3924.08	5.91868
Sleep Bout Count, Night; by Sex - Males	Line	5	8485.57	1697.11	122.98	<.0001
	Treatment	1	6.31213	6.31213	0.46	0.5097
	Line×Treatment	5	266.375	53.275	3.86	0.0253
	Rep(Line×Treatment)	12	167.006	13.9171	2.65	0.0017
	Error	704	3692.04	5.24438
Locomotor Activity; Full Model	Line	5	329503853	65900771	97.74	<.0001
	Sex	1	16148912	16148912	24.1	<.0001
	Treatment	1	800324	800324	1.19	0.2859
	Line×Sex	5	9987561	1997512	2.96	0.0329
	Line×Treatment	5	13516327	2703265	4.01	0.0091
	Sex×Treatment	1	541464	541464	0.81	0.378
	Line×Sex×Treatment	5	4093576	818715	1.21	0.3338
	Rep(Line×Sex×Treatment)	23	15615633	678941	3.69	<.0001
	Error	1367	251284541	183822
Locomotor Activity; by Sex - Females	Line	5	124369090	24873818	48.08	<.0001
	Treatment	1	2175.38	2175.38	0	0.9494
	Line×Treatment	5	2583794	516759	1	0.4619
	Rep(Line×Treatment)	11	5705125	518648	3.99	<.0001
	Error	663	86113875	129885
Locomotor Activity; by Sex - Males	Line	5	220278843	44055769	53.87	<.0001
	Treatment	1	1411977	1411977	1.74	0.211
	Line×Treatment	5	15287749	3057550	3.74	0.0282
	Rep(Line×Treatment)	12	9910508	825876	3.52	<.0001
	Error	704	165170666	234617
